# Supplementary material for: A revised genome annotation of the model cyanobacterium Synechocystis based on start and stop codon-enriched ribosome profiling and proteogenomics
Source: Research Square preprint supplement (doi:10.21203/rs.3.rs-8767029/v1), 2026-02-16
Supplement: Supplementary file 1 [file 3f09c013912dbe80979a7468.docx]

Reviewer access to our associated private datasets in public repositories:

**Synechocystis Publication RIBOBASE:**

<https://www.bioinf.unifreiburg.de/~ribobase/synechocystisbrowsepublic/overview.html>

Reviewer Access:

USER: reviews; PWD: !8d.k12!n

**GEO accession** GSE246336 - Go to:

<https://www.ncbi.nlm.nih.gov/geo/query/acc.cgi?acc=GSE246336>

Enter token “utcxayuinxwphmz” into the box.

**Mass spectrometry data:**

The mass spectrometry proteomics datasets analyzed during this study are available online through the ProteomeXchange Consortium via the PRIDE database at http://www.ebi.ac.uk/pride with the dataset identifier PXD060427;

Reviewer account details - Username: “reviewer_pxd060427@ebi.ac.uk”, Password: “DxTVqxUGgPpj".

Alternatively, reviewers can access the dataset by logging in to the PRIDE website using the following details - Project accession: “PXD060427”; Token: “fpUXqyzBu42m”.
