# Supplementary material for: A revised genome annotation of the model cyanobacterium Synechocystis based on start and stop codon-enriched ribosome profiling and proteogenomics
Source: Research Square preprint supplement (doi:10.21203/rs.3.rs-8767029/v1), 2026-02-16
Supplement: Supplementary file 2 [file ce6531ec26cb783f1d64f753.xlsx]

## Sheet: Table S1
Identifier	Genome	Source	Feature	Start	Stop	Strand	Locus_tag	RefSeq_ID	Name	Length	Codon_count	Proteomics	RIBO-WT-1_TE	RIBO-WT-2_TE	RIBO-WT-avg_TE	TIS-WT-1_TE	TIS-WT-2_TE	TIS-WT-avg_TE	RIBO-WT-1_rpkm	RIBO-WT-2_rpkm	RNA-WT-1_rpkm	RNA-WT-2_rpkm	RNATIS-WT-1_rpkm	RNATIS-WT-2_rpkm	TIS-WT-1_rpkm	TIS-WT-2_rpkm	Start_codon	Stop_codon	15nt upstream	Nucleotide_seq	Aminoacid_seq	Product	Note
NC_000911.1:2159620-2172219:+	NC_000911.1	HRIBO	CDS	2159620	2172219	+	slr0408	SGL_RS12090		12600	4200	Yes	0.544924	1.34006	0.942491	0.528977	2.64986	1.58942	14.01	9.3	25.71	6.94	25.71	6.94	13.6	18.39	ATG	TAA	CAATTAATCGAACTT	ATGACTATCAATTTGGCCGATCGCCTGTCTGCGCTCACCACAGATTCAGCAGGAACGACCCATGTTGTGTGGGTGGAAAATACCAGTCTTTGGCACGCTGTCTATGATCCGAACTCCGCCATGTGGGTTAATGCCCAGGTGATCGCCAATGTGGGTAATCAATCCCTCACTAGTCTAAATTTAATCGCCAATGACAAGTTAATTCAGCCCCCTGGTAATAACAGTAACGCCGCTCCGGCCCCTGGTTTAGTGGTGGTTTATCAACAGGGCAGTGGCAATGACAGTGATATTTTTTACACCGCCGCTCGTTACAACTCCGGGGGCAGGACGGAATGGTTAAGCACTCCCCAGGCCCTAACTTCAGACCAAGTGGGAGATTTGGCCCCCAGGGCGATCGCC…	MTINLADRLSALTTDSAGTTHVVWVENTSLWHAVYDPNSAMWVNAQVIANVGNQSLTSLNLIANDKLIQPPGNNSNAAPAPGLVVVYQQGSGNDSDIFYTAARYNSGGRTEWLSTPQALTSDQVGDLAPRAIAEENGTVLVVGQKVDAEQAKNQAIREDTDLYYQSFTVNQNQFSSNQNSPASGNIIQGNSYNYLGRNRNAPAASYEVLSAGEASFLGNKPTYQGLGLNWNASNEFNINALSLILAKKLGQEPEKVLKSMFGPLILSISLQGSSGNNPEWSLFGGGESTKGRLLLNSLATVGRKQRRNVGNSEDSNRFDKWRSQGRGALSPDSQEGFDLSFTLSSLYSYGNSNGNSDGKFPLYLETGGALASLAGSIPLFGFDDILNRGLNFNFGLFFN…	unknown protein	unknown protein
NC_000911.1:646129-658047:+	NC_000911.1	HRIBO	CDS	646129	658047	+	slr1028	SGL_RS04910		11919	3973	Yes	0.646967	4.72117	2.68407	0.451011	2.61704	1.53403	12.48	54.86	19.29	11.62	19.29	11.62	8.7	30.41	ATG	TAA	TGGAGCCTAGCCTTA	ATGAGTATAACTTTATCTGATCGCCTTTCTGCCGTTGTTCAAGACAGTGCCGGAACGAGTCATATTGTTTGGCTAGAAGGAACCAATATTTGGCACGCTGTTTATGACCCAGTTTCTCAGACATGGAAAAATGCCCAGGCCATTGTCAATACCGCTGGTCAGAACATCCGAAGTCTTAATTTGGTTGCCGATTCAGGGTTAATTGTCGAATCTGGAACAAGCAATAATACGCTGATTCCAGGCGTGGCAGTTATTTATCAAGAAGGTCTGGAAAACGACAGTAACTTTTTCTATACCGCGGCGCGCTATGACAATGTTGGCAAACTGCAATGGCTCGAAGCCCCCCAGGCCCTGACAGCGGATCAAGTGGGGGATTTAGAACCTCGGGCGGTGGTAGAC…	MSITLSDRLSAVVQDSAGTSHIVWLEGTNIWHAVYDPVSQTWKNAQAIVNTAGQNIRSLNLVADSGLIVESGTSNNTLIPGVAVIYQEGLENDSNFFYTAARYDNVGKLQWLEAPQALTADQVGDLEPRAVVDNGVITVVGQKVDLVKAQNQAIREDADPYYQTFQIYSNQFSTIPSTPVTPIAAYAPQITKDGVVQGNYIQRDQNTVAALPSATYQPLTLAETQSSSFQGWGANWTVSQTFDTNLSNLKLFKGMAGVPEALLTPIFKKFNITGTLLGSSGNNPNLSFFGGGISTEGILLNASMAVQFNEDDQDTNNTSSGTAGSSLNPAENTTQLSRKPEISLSAIAATLYTFDKSLGEDNLSYPLTVETGSLGLTVGFTFPIPIEGTPILFNFLGSA…	unknown protein	unknown protein
NC_005229.1:116886-118712:+	NC_005229.1	HRIBO	CDS	116886	118712	+	MYO_RS16565			1827	609		1.30226	0.353533	0.827898	2.77113	1.77999	2.27556	221.45	118.78	170.05	335.98	170.05	335.98	471.23	598.04	CTA	AAC	CCTGCGTAATGTGAG	CTAAACTAGCTCTTTCAAACTTTCTACAGACCACATTTGCTCAGCAATGCCTCGATACAAAGCGAATCGCTCCTCAAAACTAACCTTTGTAAACTGAGATTTCCCATCCTCTTGGTAAATAGGCTTAAGATCTAAACCAGTTCTTTCTTGCATTTGTTTGACTTTTGGCTTATTTTCATATGTCTGCGGATGTAGAGAACCAGCCAAAAGATTCTGAGTAGAGTAGACATTCACCTTATGACTATAGGGTTTGTCCTGAAGACTTGCATTCACAGACTTTGGTAACAGAACTAAACCCCCCAAACGATTGCGATAGTCCCGAAATTCATACTCATGAGAAAACTCGTCTGTATGCTCCTCAAAATGATTTGCCCAGATATGCTCAATCTCAGAATCGTT…	LN	DUF262 domain-containing protein	Derived by automated computational analysis using gene prediction method: Protein Homology.
NC_000911.1:2351323-2360412:+	NC_000911.1	HRIBO	CDS	2351323	2360412	+	slr0364	SGL_RS19945		9090	3030	Yes	0.690274	0.75	0.720137	0.263886	3.47115	1.86752	28.46	0.78	41.23	1.04	41.23	1.04	10.88	3.61	ATG	TAG	CTTTTTGTCCCGAAT	ATGCCTAACTCGACCTTGTTCGTCCTCGATTCCCGGGTGTTCCATGGGGGTCTGCTTCAGGCGGCTACTCTACCCAATATTGCGGTAATAACCCTAGATCCCGACCAAAGCGGTCTCCGGCAGATTACGGAAGCTTTGGGAAGACAAGGCGCTGTTCGTTCTCTGCATATTCTTTGCCATGGCTCTCCTGGCTGTCTGCACCTAGGTGATGGCCATCTGGGCTTAGATAATTTGGTCTACCACAGTGACGAGTTAAAAAGCTGGTTTGTCGGGGTTGAGTCTCCCCAACTATTTCTCTACGGCTGTAATGTAGCCGCTGGTGATGCCGGTACGGAATTTATTGAAAAGTTGGCCGGCTTGGCGGGGGCCGGGGTCTCCGCTTCTACCACGGCGATCGGG…	MPNSTLFVLDSRVFHGGLLQAATLPNIAVITLDPDQSGLRQITEALGRQGAVRSLHILCHGSPGCLHLGDGHLGLDNLVYHSDELKSWFVGVESPQLFLYGCNVAAGDAGTEFIEKLAGLAGAGVSASTTAIGHQALGGNWVLDFQKGDIVMENIFSAPELAAYPGILDGNGQWSLFDLVDSSGIYTERLDALQPLVQEQLSSFFAQSDYLTQLAIPFSATASTDDWTNNAESLRSSISNGSYQIRLEVRSSAELQGALGAYSATGTTDTPTVYLNADWFATASQEQIVAVLLEEIGHDFDQILNDGADSQGDEGEIFANLVKLGEVNPTYLETLKTQNDTGFAFIDGQKINLENAEDTVLNINFQNFVFNTNFTTSTPPPGVQEVRLYTNIIPTFTTQ…	hypothetical protein	hypothetical protein
NC_000911.1:1170571-1179621:+	NC_000911.1	HRIBO	CDS	1170571	1179621	+	slr1403	SGL_RS20135		9051	3017	Yes	1.55419	0.452763	1.00348	2.35792	0.749943	1.55393	150.85	39.49	97.06	87.22	97.06	87.22	228.86	65.41	ATG	TGA	TTACATAAGGTATTT	ATGGCTGCCTCTACCCAGACTCCGGCGATCGCCGTTGACTCGAACGGTTTTACACATTTAGTTTGGAACCAAAATAACGTCATTTACCACGCCTACTACGACCCTTCTGTCGGGCGGTGGCGGGAATCTGCTCCGATCGCCAATAGTGTCAGTGCCAAAGAACTTAAAATTACCACAGGAGTACGAAGCCAAGGGGAAGAAACAGGAAGTTCCGTAGAGGGGATTTTTATTTCTTGGATCGAAGGAGAAGGAAATAACAGCGATATTCATGGCGCTAGCGGCATTCTCAATAGCCTAGGGCAATATAACTGGGGCCAAACATTCAAGCTCACCGATGACGCAGTGAGTGATGAAAATATGCGGTTGCAGACCACTGCCGACGGTAATCTGCTCCTAATC…	MAASTQTPAIAVDSNGFTHLVWNQNNVIYHAYYDPSVGRWRESAPIANSVSAKELKITTGVRSQGEETGSSVEGIFISWIEGEGNNSDIHGASGILNSLGQYNWGQTFKLTDDAVSDENMRLQTTADGNLLLITEKIDLDDPQADRDLYSQVIDLRNRETLHNTLTQVKPLNPSNFIAPNASPTLALGDGDIQVPGTFLITKENKKEYQLPLSFFNGKLEFKNALALGGGINFTNLINSGDPGLSAFLQLQDELSGALSFGKNKVSLKGRLQGKLQLDFLLNGDGNTFSASDALRLRGEYERNLLPGKTTYDIGFSVGGVPISLLDAEVQLGLLFDLAFTLKQKWSTDFDLTPQALVTGGSTLAETQTENTTVEYWYSLVRADGTPAQPGDDPSQLYWL…	unknown protein	unknown protein
NC_000911.1:1124071-1130007:-	NC_000911.1	HRIBO	CDS	1124071	1130007	-	sll1265	SGL_RS07125		5937	1979	Yes	0.225469	2.62086	1.42316	0.221905	3.62508	1.92349	9.49	43.48	42.09	16.59	42.09	16.59	9.34	60.14	ATG	TAA	TTTTGCCAAGTATCC	ATGAGCAATAATCCTTCCCCTCACAGTGCGGGGGCGATCGCCAAATTGAGACGTTGGCTAACTAGACCCAGCACCTTGATCACCCTAGGGGGACTGACGGTGGTTGGTACGGGCCTATATCTGGGGGGACAACACCTGGCCTACCGGGAAGCATCACCGTTTTTGGAGTCGGAATTATCCAGATTGTTGGGTCGGCCGGTGGACATTGGCCCGGTGGAAGATTTTCGTTTACTGGGGGTGCGCCTTGGGGCTTCTTCCCTGCCCCGGACCGTTGATGATGCCACGGCGATCGCCATTGAAGCCATTGAGATAGATGTCAATCCCCTCCCTTTCCTGGTGGGACAACCGGTGGAAGTTAGGGCCACCATCATTAATCCCCAGGTGAACCTGGAGCAAAAA…	MSNNPSPHSAGAIAKLRRWLTRPSTLITLGGLTVVGTGLYLGGQHLAYREASPFLESELSRLLGRPVDIGPVEDFRLLGVRLGASSLPRTVDDATAIAIEAIEIDVNPLPFLVGQPVEVRATIINPQVNLEQKPTGQWTTIKLPEGDKPFSLPLDLTVGVNVQNAQLQLLPQGLQQPVQITAAGQGGYQYRRQGDRQTVSYDLGVQSLGSDLQAQGQTVLNTGESQTNVTINRLDLPALASLLPPLPVALETGEISGQVRGSLPSWQQWSALQTLGNVELKQLQARIDKVKAPLQVGLDLGFTGQKLQINQGLINLGPLNAALQGTIDWRSGYDLQFTTKAIDTAAFLDTIAVPLPLPITGQVQAQGQLQGTLTSPQLQGQLTNVAAVTVDRVPLDRLG…	unknown protein	unknown protein
NC_000911.1:587228-593125:+	NC_000911.1	HRIBO	CDS	587228	593125	+	slr2046	SGL_RS04640		5898	1966	Yes	0.750257	3.47749	2.11387	0.764645	4.12051	2.44258	21.9	76.47	29.19	21.99	29.19	21.99	22.32	90.61	ATG	TAG	ATTTGAGAATTTTCT	ATGAGCGTCTACAATCTTGATTTGTCCTTAGTCTATGGGAAACTGTCCGCTTTTGCAGGCTTGGAGAGTTTTTGGCAGAATTTCGAGATTATTTATGGAAATAATTATGATGTTGTCGCCGTAGAAGCTTTGCGAAGTCGTTGGGCTATTGGAGATTTTAGCGATCTTCCTGTCATTGAAGTACTCAGTGCCGAAACCTTGGGCTCTGCTGTGGGAGCCTATGCCCAAAGTATCAATAAAATTTATCTGTCTGACCAATTTGTTGCCACTGCCCCCCCAGACGCTCTGATTGAAGTCATCCTCGAAGAGATTGGACATTTTGTGGATGCTCAAGTTAACGCAGTCGATACCATAGGAGATGAAGGACAATTATTTGCAGATCTAGTGTTGGGAGATGTT…	MSVYNLDLSLVYGKLSAFAGLESFWQNFEIIYGNNYDVVAVEALRSRWAIGDFSDLPVIEVLSAETLGSAVGAYAQSINKIYLSDQFVATAPPDALIEVILEEIGHFVDAQVNAVDTIGDEGQLFADLVLGDVVSASELARIKAEDDTHTIIINGQSLQVEQSVQSLIGESVTVNVRFTGSGSDGSFNFDLFTQTFTVTSGQEITDQAITATFNSSGSPQTLTGNVDIDVSENTIYVNFSGTQQGGALTFIFTSLADESIGSVESVIQTNVSGFTTGVNQPLTPSVSNNNVTVGFFPFGSQPGVNLSQTSTLTYGTPPTDNTPPNAPSTPDLSASSDSGLSSTDNITNDTTPTFNGTAEANSTVTLFSGGSTQIGSTTANGSGNWTITASTPADGNYSI…	unknown protein	unknown protein
NC_000911.1:404545-410184:-	NC_000911.1	HRIBO	CDS	404545	410184	-	sll0656	SGL_RS03825	nucH	5640	1880	Yes	0.171293	0.92233	0.546811	0.340206	2.17753	1.25887	2.16	6.65	12.61	7.21	12.61	7.21	4.29	15.7	GTG	TAA	GAGGAGATTTTTGAC	GTGTCTAACTTAATTATTACCGGTATTATTGACGGACCACTGCCCGGTGGACTCCCGAAGGCGATCGAGTTATACGTCCTAGCTGACATTGCCGATCTCAGTATGTATGGCATTGAAGCCGCCACCAATGGCAATGCGAGCACCGGCCCAGAATTTACCCTCTCCGGCTCTGCAACGGCAGGGGATTACATTTACGTTGCCAGTGAGACATCAGGATTTAATAGCTTTTTTGGGTTTAATCCCAACTTTACCGATGGTGTAGCGAATATAAATGGGGACGATACAATAATTCTTTTTGAAAATGGTTCAATTGTTGATGTATTTGGCGAAATTGGTATAGACGGTACTGGCAGGCCCTGGGAACACCTTGACGGTTGGGCCTATCGCAACAATGGCGCC…	VSNLIITGIIDGPLPGGLPKAIELYVLADIADLSMYGIEAATNGNASTGPEFTLSGSATAGDYIYVASETSGFNSFFGFNPNFTDGVANINGDDTIILFENGSIVDVFGEIGIDGTGRPWEHLDGWAYRNNGALPSSTFNASEWTFSGVDALDDDAANVNATATPSWPIASFSAGGTNGLDLSTYVRIGRYDLPVPTRTVAPPAGSELALEVSAITYNPDTNTLFVLGDEGTAIVEIDKRGQLISSMTLTAGDFADPEGLTYVGNGQFVLVEERLRQANLFTYAAGGTLSRADVQAVTLGTTVGNIGLEGVSKDPVTGGFIFVKEVNPQGIFQTTIDFGAGTASNGSPTTQDSSNLFDPALLGMTDIADVFALANSSFVSGAIANNLLVLGQEDGRLVE…	unknown protein	unknown protein
NC_000911.1:3436529-3441844:-	NC_000911.1	HRIBO	CDS	3436529	3441844	-	sll0723	SGL_RS17765		5316	1772	Yes	0.262741	1.09658	0.679659	0.470555	3.37775	1.92415	4.64	8.97	17.66	8.18	17.66	8.18	8.31	27.63	ATG	TAG	AAGAGCTTCTTTGCC	ATGGCTAACAAATTCAAATTTACTGGTAATTTACTCGAACAAAAAACTGTCTTCCTGGAAAATGGAACAGAGGCAACTAAATCGGTCTACGATGATGTCAAGCTTTATTGGGATGGTACTGCATTAATTCAGGTTGGGGACGGTCGTCGCAGTGATGGCAATTACATCGAAGTTTTAGAGTATGTAAACAAAGATGGAAAAAAGATTCAAAATGTAGCTGCCCTGGGAACATTTTATAGTCTTGCAGGTCCTCAGCCCATCAGGCTTTTCCGGGGAGCTGTCGCTTTTAATGATGTTTTATCGGAGAAGAATAAAGATAAGTTGGTAGGTCAAGTAAAGCGTAGTGACCGTATTGAAGGTGGCTATGATCCAGTGCAGGACATCATCGGTCTCAATTAC…	MANKFKFTGNLLEQKTVFLENGTEATKSVYDDVKLYWDGTALIQVGDGRRSDGNYIEVLEYVNKDGKKIQNVAALGTFYSLAGPQPIRLFRGAVAFNDVLSEKNKDKLVGQVKRSDRIEGGYDPVQDIIGLNYQNITFFDGENNAGAVSYRAAPDIFPGINIPTTDSFFDLTFPGGTPTISGGRIQLPDINLGNAFNWYYQKKNKGAFNIPTFEPRDPKPGKPDDPKKPIKIGGITGVALEINSIDKYVQVQGKADVDLFKMAKIGVDIAGQRFIRIFDNDVQTVFLASIEFVDFGAVRINLLSFDFNSIKKQATVAGEILIRPWNNLKVGGRIGTEFTTNPAGGIADIRISTIGLYADNLNALISTPESQIYLQRIGVDFENIPPLAPGQSFNLGGSL…	unknown protein	unknown protein
NC_000911.1:524346-529595:+	NC_000911.1	HRIBO	CDS	524346	529595	+	slr1753			5250	1750	Yes	0.316453	3.69006	2.00325	0.189505	1.75414	0.971824	13.81	66.79	43.64	18.1	43.64	18.1	8.27	31.75	GTG	TAA	CCTTCCCTGGGCTTT	GTGGTGGAAATATTGTTAATTTCACCCCTGATAGCCGTGTTGAACCCCAGTTTACGCCTCTTTTGCCTAGCTTTACTGGCTTGTTCGTCTAGTTTTTCTGGCAATGTTCTGGCCCAAAACATTACCCCAGCTCCGGACGGCACTGGCACCACTGTCGATGCCCAGGGCAATCAATTCAACATTGGTGGGGGGAGTTTGTCAGGGGATGGACAAAATTTATTCCACAGTTTGCAACAGTTTGGGCTAGACCAAGGACAAATTGCCAATTTCCTTTCCAACCCTGATATTCGTAACATTCTCACCCGAATTGTGGGGGGAGATGCGTCCATTATTAACGGTCTCATCCAAGTAAGCGGGGGCAATGCCAATCTCTTTTTGATGAACCCAGCGGGCATGATT…	VVEILLISPLIAVLNPSLRLFCLALLACSSSFSGNVLAQNITPAPDGTGTTVDAQGNQFNIGGGSLSGDGQNLFHSLQQFGLDQGQIANFLSNPDIRNILTRIVGGDASIINGLIQVSGGNANLFLMNPAGMIFGPNASINVPGDFVVTTGSAIGFGNDQWFQVFSDNDYNALIGNPSQFAFDLANPGLIINAGDLSVTEGKNLTFLAGNIVNTGSLAAPGGNITVAAVPGQNRIRISQAGSLLSLEVEVSPQMNQGGSFSVLDLPTLLTQGASNLDLGLAVQPNGSVTTNGTNALVSPLPGSVTISGNVDASGKSTNISSGGQVAIAGDQIAVQGATVDVSGNGGGGTVRIGGDFQGQLTLPNASQTLIDSNSVVKADALLTGNGGTVIVWADDSTRF…	hypothetical protein	hypothetical protein
NC_000911.1:1499299-1504548:-	NC_000911.1	HRIBO	CDS	1499299	1504548	-	sll1586	SGL_RS08890		5250	1750	Yes	0.225386	2.0202	1.12279	0.167525	1.33677	0.752147	14.88	49.01	66.02	24.26	66.02	24.26	11.06	32.43	ATG	TAG	ATAGCGCCTGAAATT	ATGGTCACCGATCGCCAAAAGTCTGAGTCCCCCTTGGGGGTGCCCCGGTTAGCAGAGCATTCCAGGGCGGTTTTCCCCTGGGCAATGGTGGTGGGCTTTAGCAGTGGCGTGGTAGTGGCGATCGCCGGGGGGGTGACCTACGGTCATTATTGGGTGCAACGAAATGTGTCTCCCTTGGTGGGGCAAGCGGTGGAACATTTCTTGAATCGTCCGGTGGAGTTGGGGCCATTAACCAGTGTTTCCCTCACCCATCTAGAATTTGGTGCCACTAGCATTCCGGCTACAGCCACCGACCCCAACTGGGTACAACTCCAAAGTTTAAAGATTAGCTATAACCCCTGGCAATATCTCCAAGATGAACATCTCGGGCTGACCATCACCGCCATGGAACCCCAAGCC…	MVTDRQKSESPLGVPRLAEHSRAVFPWAMVVGFSSGVVVAIAGGVTYGHYWVQRNVSPLVGQAVEHFLNRPVELGPLTSVSLTHLEFGATSIPATATDPNWVQLQSLKISYNPWQYLQDEHLGLTITAMEPQAYFEQGRSGQWWHTEMGQLAEDFPFQLEKLIVRRGRGTVVSRNGHQALNQPIQLRLNDAQFWQGSNQELFRFRLQGQLLPLVERHSYLNLEGTIDPAQERWQLQVKSRHLPLTALKQILPLPLNFQRGTLDSDLAIAVEDQQLASLDGEVDLHQASLQLPQLARPLTAINGPLTFQGRKIQLGQVKGQLGEIQAQSKGHIDWQDGFNLAIATAPLEVNKIFQGLQFPPATMPISGQLSSTVTIQGPLENPQINVALQKAGKNSLQIE…	unknown protein	unknown protein
NC_000911.1:2360457-2365685:+	NC_000911.1	HRIBO	CDS	2360457	2365685	+	slr0366			5229	1743	Yes	0.276674	0.957377	0.617026	0.15699	3.80328	1.98013	21.73	2.92	78.54	3.05	78.54	3.05	12.33	11.6	GTG	TAG	ACCAACACCTTGGCA	GTGACCTTTAACGGCACGACCTATACCTTTGGGGAAAATCCTCAGCTAACAGTCAGTGGCAACAACTGGACCCTAGACCTCAGCGGTATCACCACCCCTCCAGGGGATTACGTCATCACTGCTGTCACCACTGACTTAGCTAACAACACCAGCCAAGCCACTCAAAACGTCACGATCGACACCACAGCACCCAATGCCAGCATCACACTGACATCCAACATCACAGCAGATGATGTCATCAATGCCGTCGAAGCCGGTCAGCTCATTCCGATCACCGGCACCGTCGGTGGCAACGTCAGAGCCGGTGACATTGTCACCCTCGCGATCGGTGGTCAAACCTTCACAGGAGCAGTCGCCAATGGTGGTACCTTCAGCATCGATGTTCCAGGTAGCGCCTTA…	VTFNGTTYTFGENPQLTVSGNNWTLDLSGITTPPGDYVITAVTTDLANNTSQATQNVTIDTTAPNASITLTSNITADDVINAVEAGQLIPITGTVGGNVRAGDIVTLAIGGQTFTGAVANGGTFSIDVPGSALVADPDRTIQASVTTTDLAGNSTTATDTESYTVDTTVPGAPIVTITEDVNNDGLISVGELSGLVDVSIAIPGGVVAGDILTISDGTTPQTIVLTAAQINAGVVTTQVAVPNPGTTLTVTAFVTDIAGNQGTSGRDSAVLDTTAPGAPTVTITEDTNNDGFISAGELNGLVDVSIALPTGLVAGDTLTISDGTTPQTIVLTTAQITAGVVTTQVAVPNPGTTLTVTAFVTDIAGNQGPSGRDSAVLDTTAPEAPVVTIAEDANNDGLI…	unknown protein	unknown protein
NC_000911.1:1422426-1427651:-	NC_000911.1	HRIBO	CDS	1422426	1427651	-	sll1951			5226	1742	Yes	0.511222	6.46222	3.48672	0.157561	0.696841	0.427201	124.82	773.14	244.16	119.64	244.16	119.64	38.47	83.37	ATG	TAA	GTTTTAAGAAGTCCT	ATGGCACTAAGTCCTAACGTAATTGCGGCTCTACAGATCATGTACACCGGCCGTGGTGTATCCGCCAGTGATCTGAATTGGTGGGCCACAGATGGGGCAAACATCACCTATGCAGAAGCAGTTGCCCTGTTTGCCAGCAGCCCCGATGCAGCTATTAAGTATCCCTTTTTCCAAGCGCCCCAAACCGCTGACAAACGCCAGTATGTAGCCCAGGTTTTTGCCAATCTCTACAACATTGACATTAACGATACCTCCCTGGTCCCCACGGAGGAATTGGACTACTGGATTAACTGGTTGTCCCTGTCCCCCGACAACTATCTAGATTTCCCCAACGCGCTGAACAATGCTTCCGCCGCTGCTGGTCTGACCGATCGCCTCGAGGCGCTGACCAACAAAGCT…	MALSPNVIAALQIMYTGRGVSASDLNWWATDGANITYAEAVALFASSPDAAIKYPFFQAPQTADKRQYVAQVFANLYNIDINDTSLVPTEELDYWINWLSLSPDNYLDFPNALNNASAAAGLTDRLEALTNKADVSLSYTEALSTAGVNTFTEAQYAEAAGIIATVDDTNASVLAAEAQIVEIAASLSVFTIAQAQATPNLPPAYTISDTADNLIAGADDPVVTGANNVIANQSPAAPLSVEDANILLATADELAAGVTWDILDTAADVLAGGAAVSGAASVGITDIVDVATASQLLALGNFDGVYAIADTSANIVADPGVSGGATAITLSDPDVPVSVASATFLQGLGIPVGPSYIVEDTSANILAALSTPAIVNAAEVIVNNTDVPLSVAQAEDLLS…	unknown protein	unknown protein
NC_000911.1:2319555-2324636:-	NC_000911.1	HRIBO	CDS	2319555	2324636	-	sll0163	SGL_RS12775		5082	1694	Yes	0.854496	2.7172	1.78585	0.567734	1.06968	0.818707	44.28	93.2	51.82	34.3	51.82	34.3	29.42	36.69	ATG	TAA	ACTAACTTCACACCG	ATGACTGTTATGTTATCTTGCCTCACCCAGCAACAAGAACTTTTGCAATCCCTCGCTGACCGGGTTGGGCAACCAGCGATCCAGGATAACCTTTACTTTTGCCTAGCTGGTCAATTCACGTGGGTGGAAGATTGGTACACAACGGCGATCGCCGGTGACGTCTTAATTTTTGATGCGGGGGAAAAGGAGCAACTGGCTAGGGTTTTGCAACAATGGGAGCAGTTTACGGGGCATGTTATCCTGATCACCGGCTTGACGGAAGAGCCCGATCCCCAAACTTTTTTAACCCAATTAGCCCTGGGAAAACAACAACGGTGCGGAGAAAGACATTTCCATTGGATCGTACTAGTTGACCCCACCATTGAAGAAGCTTTTCGCGGCCTACAGACTTTCTTGGAC…	MTVMLSCLTQQQELLQSLADRVGQPAIQDNLYFCLAGQFTWVEDWYTTAIAGDVLIFDAGEKEQLARVLQQWEQFTGHVILITGLTEEPDPQTFLTQLALGKQQRCGERHFHWIVLVDPTIEEAFRGLQTFLDGKSHWLDLRLGVGDLEQCTDELWQCVWLEPSPLAPEKRQEMLVNLPHWLAEIVDQKQNLELEPISLLQAKLSLLQGLARESRGEMGRKQAQCHYRESLDVWELLGDTEAIIWLSLRLGYLFLLQAYGEKSRGHQLWQQTRNYAQTAIAALENQQWHFTHGETLNLLGEILRGLEDWEQLRQAAENSLIFFYQLSPFAATDTTPERNQEKLWTELELQGLISLAHSYLCEALVEQWKFDEGKEALKRAFETRPKQVEERDYRPCLAN…	WD-repeat protein	WD-repeat protein
NC_000911.1:3354192-3358832:-	NC_000911.1	HRIBO	CDS	3354192	3358832	-	sll1499		glsF	4641	1547	Yes	0.456361	5.67575	3.06605	0.163811	0.891694	0.527753	45.02	170.84	98.65	30.1	98.65	30.1	16.16	26.84	ATG	TAG	CCGTTGCTAGCTCCT	ATGACAAACTCCTCTGTTGCCACCAATTCTAACCAACCATTCCTTGGTCAACCTTGGTTAGTGGAAGAACGAGATGCCTGTGGTGTGGGTTTTATTGCCAATCTCCGGGGTAAGCCGGACCATACCCTGGTGGAGCAGGCCCTAAAGGCTCTGGGGTGTATGGAACATCGGGGGGGATGCAGTGCCGATAACGATTCAGGGGACGGGGCCGGGGTGATGACCGCCATTCCTCGGGAACTACTGGCCCAGTGGTTTAACACCCGCAATTTGCCCATGCCCGATGGCGATCGCCTGGGGGTGGGAATGGTATTTTTACCCCAGGAACCCTCCGCTAGGGAAGTGGCCCGGGCCTACGTAGAAGAAGTGGTACGGCTGGAAAAATTAACAGTGTTAGGGTGG…	MTNSSVATNSNQPFLGQPWLVEERDACGVGFIANLRGKPDHTLVEQALKALGCMEHRGGCSADNDSGDGAGVMTAIPRELLAQWFNTRNLPMPDGDRLGVGMVFLPQEPSAREVARAYVEEVVRLEKLTVLGWREVPVNSDVLGIQAKNNQPHIEQILVTCPEGCAGDELDRRLYIARSIIGKKLAEDFYVCSFSCRTIVYKGMVRSIILGEFYLDLKNPGYTSNFAVYHRRFSTNTMPKWPLAQPMRLLGHNGEINTLLGNINWMAAREKELEVSGWTKAELEALTPIVNQANSDSYNLDSALELLVRTGRSPLEAAMILVPEAYKNQPALKDYPEISDFHDYYSGLQEPWDGPALLVFSDGKIVGAGLDRNGLRPARYCITKDDYIVLGSEAGVVDL…	ferredoxin-dependent glutamate synthase	ferredoxin-dependent glutamate synthase
NC_000911.1:2111141-2115742:-	NC_000911.1	HRIBO	CDS	2111141	2115742	-	sll0267			4602	1534	Yes	1.01441	2.67165	1.84303	0.654179	1.10621	0.880193	31.68	35.72	31.23	13.37	31.23	13.37	20.43	14.79	ATG	TAA	CACTGGCGCATAGAA	ATGGTTAGTCAACAGATGCGCCAACAGTTGCTGAGCCAGGTGGAAATGGTCTCCCTAAACCTAAACTTTCGACTTTTTCAAGAGCTTTCCTTCACCCCACAAGACTTGGAGAATCCTTCCTTCCAAAGACTCCACAATCAGATGGCTGCCTACGCTCAGACATTCGAGCACCGTAGCATATACACCATGGTTATAAGGAGTGGAAAAATTCTTTTTGGCCCTGATAGTCTTAAGTCCGGAGATTTTCTTGCCCGCGACCCTGGTGCCGTCTATAAAAATCCCCCGGAGGCGGTCCGACAGTTATTTGAGCTCCCTTCCAAAAAATTAGTCATTGGTCCATACCATAGTGAACGGGGTAATTTTGTTTCGGCCTATGCGCCCATCCTACAGCCCCAATCC…	MVSQQMRQQLLSQVEMVSLNLNFRLFQELSFTPQDLENPSFQRLHNQMAAYAQTFEHRSIYTMVIRSGKILFGPDSLKSGDFLARDPGAVYKNPPEAVRQLFELPSKKLVIGPYHSERGNFVSAYAPILQPQSERVLVIVAMDMEARQWHQKLQQKLWTPLLFSVGLIALILGGDYLLQERRRWRNSFITNQGEALATAIVGLFLTLALTAVVQENSLLNSQRNFSQLAIPRANLFAQKLWELQNYGLSSLNSFMESSAEVTRAEFARFTLPMIRKLSIQAWEWIPKVTAADRENFERRARQDGIENFQIFELNRRGKPVPAEGREVYYPIFYAEPLAGNDIALGFDVSSNESAKMALDEALENRLPTATNPLTLIQELGKQRGIVAYSPVFADGNLEN…	unknown protein	unknown protein
NC_000911.1:477668-482260:-	NC_000911.1	HRIBO	CDS	477668	482260	-	sll1502		gltB	4593	1531	Yes	0.599955	6.36573	3.48284	0.183382	0.886646	0.535014	53	220.7	88.34	34.67	88.34	34.67	16.2	30.74	ATG	TAG	ACGGTTACCAGTCCT	ATGAACAGCTCTCACCTCGCCCCCCAAGTCCAAGGTCTTTACGATCCGCAAAATGAACATGATGCCTGTGGGGTAGGTTTTATTGTGCAGATGAAGGGCAAAGTTTCCCACGATATTGTGGAGCAGGGCCTGCAAATGTTGGTTAATTTGGAGCATCGGGGGGCCTGTGGCTGTGAACCAAACACCGGGGATGGGGCCGGTATTTTAATCCAAGTTCCCCATAAATTTATCCAAAAAATAGCCGGGGCGGAAGGCATCACCATTCCTGCTCCGGGGCAGTATGCCGTGGGCAACATTTACGGTTCCCCCGATCCATTGGCCAGGGCTGAAGCTCGTCAAAAATTCAATGACATTGTTGCCCAAGAAGGCTTAAAAGTTTTGGGTTGGCGGGACATTCCT…	MNSSHLAPQVQGLYDPQNEHDACGVGFIVQMKGKVSHDIVEQGLQMLVNLEHRGACGCEPNTGDGAGILIQVPHKFIQKIAGAEGITIPAPGQYAVGNIYGSPDPLARAEARQKFNDIVAQEGLKVLGWRDIPTQNEPLGETAIASEPFMQQVYIARPEGLTDDLDFERKLYVIRKLTHGAIRSPKIDTYWYVASLSARTLVYKGMLTTAQVGQYYPELHDPDMESALALVHSRFSTNTFPSWERSHPYRYIAHNGEINTMRGNVNWMQARQALFESSLFGEDMAKVQPVINIDGSDSTIFDNALELLYLAGRSLPHAVMMMIPEPWSAHESMSQEKKAFYKYHSCLMEPWDGPASIAFTNGKMMGAVLDRNGLRPSRYYVTKDDLVIMASEAGVLPIE…	NADH-dependent glutamate synthase large subunit	NADH-dependent glutamate synthase large subunit
NC_000911.1:533086-537474:+	NC_000911.1	HRIBO	CDS	533086	537474	+	slr1759		hik14	4389	1463	Yes	0.163438	1.05476	0.6091	0.14891	0.964286	0.556598	1.35	4.43	8.26	4.2	8.26	4.2	1.23	4.05	ATG	TGA	GAATAGGTATTTATC	ATGGTTATTAGTGCCACTGTGATATCGATGAAATCTCCCCTGCGTCGCCTATTACTTTCCCCCGTACTACCAATTCTCATCGGGGCCGGGCTATCGGTAATGACTGTTCATACTTGGCTTTTTCTCTACAACCAAGTTCAAGAGCGACTGAAGCAGGTTTTGACCAATCGCCTAACTAACATCCACGAACAAATTGAAAACCAGCTCAATATCCATGTCCGTCAATTAGAGCAGATGGCCGGACGTTGGGAACGATCGCCGACGGGAACGGAGCAAACAGATTGGCGGTTAGATGCCAGGGCCCAAGCAGAAGGCTTCGATGGGTATCAGACGATTCAATGGGTAGATCCAAAGTTTGTGGTGCGGTGGGTTGAACCATTGCCCGATGATGAGCACGAC…	MVISATVISMKSPLRRLLLSPVLPILIGAGLSVMTVHTWLFLYNQVQERLKQVLTNRLTNIHEQIENQLNIHVRQLEQMAGRWERSPTGTEQTDWRLDARAQAEGFDGYQTIQWVDPKFVVRWVEPLPDDEHDIDYANQYPHQIQSLELAARQKNTILSGVVDLDQGEKGFLVYVPLFIGDRFDGFVVGVFQLDQFIGSVRPLSGNKPDQDSGLRSFGLRIFEGNQLIYNDVPDDWEQDIVVTQELAWANSLPQAEAMTSRWQLQLVPGPILLDQYGSSQWILFSGLLMAWAVAIAVYYLQKSSKHSEQLSESIKQQQKVEEFLKSTLQELAVQKTALDEAAIVAITDTEGVITYVNDKFVEVSGYSREELIGNTHRLVSSGYHSPEFFQQFWQTIRAG…	two-component hybrid sensor and regulator	two-component hybrid sensor and regulator
NC_000911.1:410315-414544:-	NC_000911.1	HRIBO	CDS	410315	414544	-	sll0654	SGL_RS03830		4230	1410	Yes	0.275534	1.36538	0.82046	0.204276	1.21923	0.711753	1.16	3.55	4.21	2.6	4.21	2.6	0.86	3.17	ATG	TAA	ATTTCTAAAGCAATT	ATGACCATTAACAGCGGCGTTAGTTTGATTAGCAAAATTGGCGGCTTTGCCAGTAGCAACGGGGCAGAAATTCCCGCCTTCGACCCCGGTACTAAGCGCCTATTTGTGGTCGCCGGTGACGTGATTGAAATTCTAGATTTAGCCGACCCCACTAACCCCGTCAAGATTGAAGATTTAGCCCTAAATTTCGATGGCATTCCCCCTGGTTTCAGTCCTGTGCCCAACAGTGTGGCAGTGGGTAAGGCCGGCACTCCCAGTGCGGGAATTGTGGCTGTATCTCTGGCAATTCGAGATGATTTGAATAACCAAGAAGCTGGTCAAGTGCAGTTTTTTGATGCAACCACAGGGGCTTTTTTGGGCAAAGTCTCAGTGGGCTTTCTGCCGGACATGGTTACCTTC…	MTINSGVSLISKIGGFASSNGAEIPAFDPGTKRLFVVAGDVIEILDLADPTNPVKIEDLALNFDGIPPGFSPVPNSVAVGKAGTPSAGIVAVSLAIRDDLNNQEAGQVQFFDATTGAFLGKVSVGFLPDMVTFSPDGTKILTANEGEPNESYTVDPVGSVSIVDITGGFTNLVAQNATFDGFNAQKAELQSAGVRFLGQIFDADGNVVRESTVAEDLEPEYIAFSGDGTKAWVTLQENNSVALIDIATTTVEAILPLGFKDHSLPGNGLDASDRDGGINIQNWPIFGMYMPDSIASFAVGDQTYYITANEGDARNRPSDDDLLPPPFDGEGDIFIEEARIKDLVLDPIAFPNAAELQADPAIGRLTVTTKLGDTDGDGDFDELYVYGSRSFSIWNSSGN…	alkaline phosphatase	alkaline phosphatase
NC_000911.1:3144213-3148421:-	NC_000911.1	HRIBO	CDS	3144213	3148421	-	sll0043	SGL_RS16475	pixL, taxAY1, hik18	4209	1403	Yes	0.828495	2.1362	1.48235	0.811806	0.515209	0.663507	120.14	158.72	145.01	74.3	145.01	74.3	117.72	38.28	ATG	TAA	TTCCCCTTTGCCCCC	ATGCTCAACTCCGACATTCGTGACCACGCCTACCAGTTTTTCATTGAAGAAGCACCGGAATTGCTCAGTGTGATTGAAATGGGGCTGTTGGAGTTGCGGGGAGAGAGGACACCAGCCCAGATCCATGGCATTATGCGGGCGGCCCATTCCATTAAGGGCGGGGCGGCCAGTGTGCAACTACCGGCCATTGAAGAATTAGCTCACCGGCTGGAGGACATTTTCAAGGCGCTCTATAGCGATGCGGTGGTGGTGGATGACAGGTTGGAAGGAATGCTCTTGGAAGGGTTCGATTATCTTAAACAAGCCCTCACCACCCAGATTGAAACGGGGCAGTTGGAGCATACTGAAGTTTTGGTGCAGGGGTTGCCGGTGATTGCGGCCATTGAGGAGCAGTTGGGG…	MLNSDIRDHAYQFFIEEAPELLSVIEMGLLELRGERTPAQIHGIMRAAHSIKGGAASVQLPAIEELAHRLEDIFKALYSDAVVVDDRLEGMLLEGFDYLKQALTTQIETGQLEHTEVLVQGLPVIAAIEEQLGEHLAAGEQFLPSSADLGVDIVASLFEVDVAQGLAEIGEALAGDDEERLRGTLAAQTEIFAGLAEILNLPGFKEITDLVAQGLDNPGLSVGELALVAVENWQHSCGQVLEKGDRQRGGEPSEALLALVRGQGERDLAAIAGLEEVFGGGEVGEEFWGMDFPELGDIPTAISTAEENVFAAWEETPTEMTFQPGEGDIPASDRQPSLGPERVNLEEPAYRFFIEEAPTLLQEIETGLLTIGQDRSAAVVHGIMRAAHSLKGGAASVGL…	positive phototaxis protein, homologous to chem otaxis protein CheA, two-component hybrid histidine kinas e	positive phototaxis protein, homologous to chemota xis protein CheA, two-component hybrid histidine kinase
NC_000911.1:862262-866377:-	NC_000911.1	HRIBO	CDS	862262	866377	-	sll1124	SGL_RS05945	plpA, hik3	4116	1372	Yes	0.304994	1.61093	0.957961	0.212036	1.10874	0.66039	11.91	29.48	39.05	18.3	39.05	18.3	8.28	20.29	ATG	TAG	AGCTGTGCCAGAACT	ATGACTTTTGCCGCCACTCCCAGGGAAGTCACCGCCAGCGCCATTCAATGGGCCTGTCTTTGTTTGCCAGGAGAATTGAGTGCGGCAGAGGCCCTTAACCGCTGGCATCGCCATGGCCAACGTTCCTGGGAGCCCCCGGCAGAGGCTAAGGCTTTTCCCCCCTGGGCTTTGGTGCTAGATAACGACGGTCAACTGTTGGGTTTATTACCGGATTGGCAATTGGCCGCCGCCCTGTGGACTGAACATTTTTCCCCGGCGATCGCCTTGGCGGAACTGTGTTTGCCTTGCTCCCTGCGGCTAGACCTAGAAAAGTTGCCTAGTTTAGGGGAAGTTATGCAGATTTTTGCCACCTGGGGCTACGGCTGGGACGTAATCCCTGTGGCGGATCGACAACACCAA…	MTFAATPREVTASAIQWACLCLPGELSAAEALNRWHRHGQRSWEPPAEAKAFPPWALVLDNDGQLLGLLPDWQLAAALWTEHFSPAIALAELCLPCSLRLDLEKLPSLGEVMQIFATWGYGWDVIPVADRQHQTWGLLSIGNLIRSVNLCQLWQNLPLQVTASPPLCLGTETTLGELVHHCFERQISSFPVVYSSPLLPAAAPRIPLGNVSLSNYFKGPNYGSLGLDNPIGPDLSPTFPLCTINQTYCHARELLRRQNDDYVIITNISGAFVGWVGPQQWLATVQPDVLLEALQREVEMPRIVQHLEARIVWQQQQQQRNQHLIQKLLSRNPNLIYLYDLVKNEIVYLNIPGSLLEGGSGGAPIPNPMVETDPRQDLLLPPRYFGLEELAALQAHEKKE…	two-component sensor histidine kinase, phytochr ome-like protein	two-component sensor histidine kinase, phytochrome -like protein
NC_000911.1:508515-512510:+	NC_000911.1	HRIBO	CDS	508515	512510	+	slr1055	SGL_RS04275	chlH	3996	1332	Yes	0.892318	9.70523	5.29877	0.110527	0.664569	0.387548	40.77	200.51	45.69	20.66	45.69	20.66	5.05	13.73	ATG	TAA	GAGAACACCACTTAT	ATGTTTACTAACGTCAAGTCCACCATCCGCCGTGTTGATCCCGAAGCGTTGAATGGACGCCAGCTACTCAAGGTGGTTTATGTGGTCTTGGAATCCCAGTATCAGAGCGCTTTGTCGGCGGCCGTTAGAAACATTAACCGTACCAACTCCAGCCTGGCCATTCAGTTAACGGGCTATTTGATCGAGGAGTTGCGGGACCCGGAAAATTACGCCAACTTTAAACATGACGTCAGCGAAGCTAATCTCTTCATTGCTTCCCTGATTTTTATTGAAGATCTGGCCGATAAGGTGGTGGAAGCGGTAACTCCCTATCGGGACAATTTGGATGCGGCGATCGTGTTCCCCTCCATGCCCCAGGTGATGCGCCTGAACAAAATGGGTTCCTTTTCCATGGCGCAA…	MFTNVKSTIRRVDPEALNGRQLLKVVYVVLESQYQSALSAAVRNINRTNSSLAIQLTGYLIEELRDPENYANFKHDVSEANLFIASLIFIEDLADKVVEAVTPYRDNLDAAIVFPSMPQVMRLNKMGSFSMAQLGQSKSAIAQFMKKRKENSSGAGFQDAMLKLLRTLPTVLKYLPVEKAQDARNFMLSFQYWLGGSQENLENFLLMLTDKYVYPDLGLDKLVNYQEPVVYPDMGIWHPLSMQMFENVKDYLEWYNQRPDISEDLKDPLAPCIGLIMQRTHLVTGDDAHYVGMVQELEAMGARVICVFSGGLDFSKPVNEYFWDKSVNGVEPLPIVDAVVSLTGFALVGGPARQDHPRAIESLKKLNRPYMCALPLVFQTTEEWEASDLGLHPIQVALQ…	magnesium protoporphyrin IX chelatase subunit H	magnesium protoporphyrin IX chelatase subunit H
NC_000911.1:2755703-2759662:-	NC_000911.1	HRIBO	CDS	2755703	2759662	-	sll0178	SGL_RS14735		3960	1320	Yes	0.285849	1.65559	0.97072	0.0830189	0.559968	0.321493	9.09	20.43	31.8	12.34	31.8	12.34	2.64	6.91	ATG	TAA	CCCGTTCGGCTGAGC	ATGTCGCAACAAAACTATAATTGGAAGCGGTTCTGGTGTCCTCGCTCAGGTAACATAAGTCTGAGAGATGGCGGTTACTTAGACGATCCAAATACAAAATGGGGCAAAGCATGTAACCCAGATCTGGTGAGTTTAGAAGATATTGCTGAGATTCCTTGCCTTGTTTTATTGGGGGAGCCTGGCGTTGGCAAAACCCACGAACTAGAAAAGCTACAACGATTTACCGAAGAAACAATCTGCGAATATAGTAAAGTCCTGGGCTTGAATCTTCGAACCTTTACTAATTTAAAAGAGGATTTGTTTAGGGATAAAACTTTTTCCGACTGGTTAGAGGGTCATTATCACCTCCATTTGTTTTTGGACAGTCTTGATGAAGGACTCTTGAACGTCAAATCCTTG…	MSQQNYNWKRFWCPRSGNISLRDGGYLDDPNTKWGKACNPDLVSLEDIAEIPCLVLLGEPGVGKTHELEKLQRFTEETICEYSKVLGLNLRTFTNLKEDLFRDKTFSDWLEGHYHLHLFLDSLDEGLLNVKSLAIGLVDEFKKPKYRSHINRLHLRLTCRTLAFPSILEEALKALWEESNFAIYELAPLRRIDVINAVEAEGFSSDDFLKAINQRDIVPLAIKPISLGFLLNTYRRHNSQFPPEQKRYESYLEGCKCLCEEVSKCRHALKETGNLDIDQRLIVAARIAAVTIFANRFAVWIDVEQGQVPAEDVPRQKLCFGYEESNGREFEITQEVIQEVLDTGLFSSRGLHRMGWAHQTYAEFFAAWYLTQRNIDLSKIKTLLYSSADSTPKLIPQLH…	hypothetical protein	hypothetical protein
NC_000911.1:853497-857450:-	NC_000911.1	HRIBO	CDS	853497	857450	-	sll1789	SGL_RS05925	rpoC2	3954	1318	Yes	0.25701	6.48638	3.37169	0.03211	0.331632	0.181871	98.53	711.75	383.37	109.73	383.37	109.73	12.31	36.39	ATG	TAA	CAATCTTGGAGCGTT	ATGACGTTTTATAACTACACCATCGACAAAGGCCGCCTGAAAAAACTCATTGCCCTTGCCTACCGTCGTTACGGTTCTGCCCGCTGTTCACAGTTGGCTGATGAACTGAAGGAACTGGGGTTTCGTTTTGCCACCAAAGCGGGGGTTTCCATTAGTGTAGATGACCTAACTATTCCTCCAGAGAAAAAGCAAATGCTGGAGGCGGCGGAAAAGGAAATTCGCACCACGGAGGAACGCTATGCTCGGGGGGAAATCACCGAGGTAGAACGGTTCCAAAAGGTAATTGATACCTGGAACGGTACTTCGGAGGAGTTGAAGGATCAGGTGGTGGTTAACTTCCGCAAAACCGATCCTCTCAACTCCGTCTATATGATGGCTTTCTCCGGTGCCCGGGGGAAC…	MTFYNYTIDKGRLKKLIALAYRRYGSARCSQLADELKELGFRFATKAGVSISVDDLTIPPEKKQMLEAAEKEIRTTEERYARGEITEVERFQKVIDTWNGTSEELKDQVVVNFRKTDPLNSVYMMAFSGARGNMSQVRQLVGMRGLMADPQGEIIDLPIKTNFREGLTVTEYVISSYGARKGLVDTALRTADSGYLTRRLVDVSQDVIVREQDCGTERSLRVTAMTDGDQVKISLADRLFGRLLAKDVVGPDGEIIAKRNDEIDEALANRIAAVTDEVYVRSPLTCEAARSVCQNCYGWSLAHGHKVDLGEAVGIIAAQSIGEPGTQLTMRTFHTGGVFTGEVARQEKAPEDGTVKWGKGLSTRKVRTRHGEDAEQVEIAGDLIWKGEGKKAATQTYSL…	RNA polymerase beta prime subunit	RNA polymerase beta prime subunit
NC_000911.1:3443514-3447386:-	NC_000911.1	HRIBO	CDS	3443514	3447386	-	sll0721			3873	1291	Yes	0.2474	1.29286	0.770132	0.452107	2.44115	1.44663	4.52	13.95	18.27	10.79	18.27	10.79	8.26	26.34	GTG	TGA	AAGTATTAGAGTCCA	GTGGAGGGTTTCAAAATGGGGAAAATATGGCAAGGCTCGGAATCAGCTGACAACATCGATCTCAGACCATCTGATCGTCATAAATTCGATGTTGTTTGGGCAAAATCCGGAGATGATCTTGTCCATGGTCGAAATTTTTCCAGCCTATCAGGAGCCAATGACACCATATCTGGAGCGAATGGGAACGATGTCATCTACGGCCACCACGGAGATGATTTTCTTTCAGGTGAAGGGGATTCGGACACAATTTATGGCGGCTTTGGAAATGACGCCATCCGTGGGGGGTACCACGACTGGATTCCTGGTGGAACTCCTGATGGAGCAGATAAACTTTACGGAGAAGAAGGTGATGACATGATTCTCGCAGAAGGAGGAGATGATCAGATCTGGGGAGGCCCT…	VEGFKMGKIWQGSESADNIDLRPSDRHKFDVVWAKSGDDLVHGRNFSSLSGANDTISGANGNDVIYGHHGDDFLSGEGDSDTIYGGFGNDAIRGGYHDWIPGGTPDGADKLYGEEGDDMILAEGGDDQIWGGPGNDRLFGEHGNDQIWGEDGDDYIDVGPGLDSAWGGNGNDTITSNWMAGRKYLSGEDGNDTIFGAENSDIIEGGPGDDVLWGLRAYPSSVGDAIDRIYGGPGNDLIYGDSFYFPNDGLWSSVLQYTQDIIWGGLGNDTIQGMAGNDTIYGGEGNDIIYGGYDPSGSFIPPAEFHGDNFIDVGTGHNFAYGGPGNDVIKVSGEISEQGFNILIGGDGDDLIQGGDNSVPIEDLVVLPGLEEQVKELKEFIKTLENAEGVVPTIGDFID…	unknown protein	unknown protein
NC_000911.1:2863093-2866923:-	NC_000911.1	HRIBO	CDS	2863093	2866923	-	sll0821	SGL_RS15220	cph2	3831	1277	Yes	0.307292	1.46567	0.886482	0.167014	1.02182	0.594417	8.85	27.54	28.8	18.79	28.8	18.79	4.81	19.2	ATG	TAG	CCGCCGAGTCAAAAC	ATGAACCCTAATCGATCCTTAGAAGATTTTCTCCGTAACGTCATCAATAAGTTCCACCGGGCTTTGACTTTACGGGAAACCCTCCAGGTAATTGTGGAAGAGGCTCGTATCTTTTTAGGAGTGGACCGGGTAAAAATTTACAAATTTGCCAGCGATGGCAGCGGGGAAGTGTTGGCAGAGGCAGTTAACAGAGCTGCTTTGCCATCCTTGTTGGGGCTACATTTTCCGGTGGAGGACATTCCGCCCCAGGCCAGGGAAGAGTTGGGTAACCAAAGGAAGATGATCGCCGTGGATGTGGCCCACCGTCGGAAAAAATCCCACGAGTTGTCCGGTCGCATTAGTCCGACGGAGCATAGTAATGGCCATTACACAACAGTGGATAGTTGTCATATTCAATAT…	MNPNRSLEDFLRNVINKFHRALTLRETLQVIVEEARIFLGVDRVKIYKFASDGSGEVLAEAVNRAALPSLLGLHFPVEDIPPQAREELGNQRKMIAVDVAHRRKKSHELSGRISPTEHSNGHYTTVDSCHIQYLLAMGVLSSLTVPVMQDQQLWGIMAVHHSKPRRFTEQEWETMALLSKEVSLAITQSQLSRQVHQQQVQEALVQRLETTVAQYGDRPETWQYALETVGQAVEADGAVLYIAPDLTGSVAQHYQWNLRFDWGNWLETSLWQELMRGQPSAAMEPMAAVQSTWEKPRPFTSVAPLPPTNCVPHGYTLGELEQRSDWIAPPESLSAENFQSFLIVPLAADQQWVGSLILLRKEKSLVKHWAGKRGIDRRNILPRLSFEAWEETQKLVPTW…	phytochrome-like protein	phytochrome-like protein
NC_000911.1:1563115-1566900:+	NC_000911.1	HRIBO	CDS	1563115	1566900	+	slr2098	SGL_RS09190	hik21	3786	1262	Yes	0.346648	1.88611	1.11638	0.172282	0.928901	0.550591	9.98	28.65	28.79	15.19	28.79	15.19	4.96	14.11	ATG	TAG	ATCTATGGGCAACCT	ATGTTTTGGCAACCTGTTAGTCCCCTCAACGCTGACCAGCTTAATTATCAGGGTTCCTATGACCCTAAATTAGTTCTGCTCTCTGTGGCGATCGCCATTTTTACGGCCTATATGGCTTTCTTGATGGCCAGTTCCGCCCTATCGTTGCCGGGGCGTTGGTCACGGAAAATTGCCTTAGCCCTCAGTGGGACTGTTATGGGGTTAGGTATTTGGGCCATGCACTTCATTGGCATGCTGGGGTTTGAGTTGCCCTGCCCCATCAGCTACGATCCCTTGATCACGTTTATTTCTGTTATACCGGCGATCGCCGCTAGCATTTACGCTCTGAACTTTTTGAGTTTCCAGGCCCCGACGGCGAAAAACCTCATGGTGGGGGCTATCTGGTTTGGTTTGGGCATT…	MFWQPVSPLNADQLNYQGSYDPKLVLLSVAIAIFTAYMAFLMASSALSLPGRWSRKIALALSGTVMGLGIWAMHFIGMLGFELPCPISYDPLITFISVIPAIAASIYALNFLSFQAPTAKNLMVGAIWFGLGIGTMHYSGMAALELHGNIYYELPLFVLSLVIAVMLAFVALLFRFHSAKIFHTTHGPALGSSALVMGLSTSGMHYTAMTATHFICRPWGEFFIQGIDIQEVAIAVTISITLLTGGVMLFVLREISIQNQQQKILVATESWYRQIIEYAPEGIMVLDAQGNIILANTSIEKLFGYSQTELIGQSIALLGLAELLQQSLHLLQEGEDVGPTCPLDQEEFEILGTRYDGSEFPIEVSLTSLPSLSQREMNIFASVRDISARQEAQQQILRQ…	two-component hybrid sensor and regulator	two-component hybrid sensor and regulator
NC_000911.1:3084677-3088435:+	NC_000911.1	HRIBO	CDS	3084677	3088435	+	slr0697	SGL_RS16205		3759	1253	Yes	0.548681	3.70083	2.12475	0.279345	2.47603	1.37769	6.03	22.39	10.99	6.05	10.99	6.05	3.07	14.98	ATG	TGA	AAGATAAAAATAATC	ATGACCAAATTTTTTGTGGACCGGGGCGGCACCTTTACCGATATTGTTGCCATTACCAAAGATACAAAATTAGCCCAACATTCCGCTAAAGATAGGCGATTTAGCGTATTTATCCTACCCACAAAAGAAACGGTAATTTTATTTAAATTATTATCAGAAAATCCGGAACTTTATGACGATGCAGTTATCCATGGCATCCGAATTATTTTAGGTTTATCTTCCAACGAACCCATCGCCCCAGAAAAAGTTAGCATGGTTAAAATGGGCACCACCGTAGCCACCAATGCGTTGCTGGAACAGAAAGGAGATCCCCTAGTTTTAGTGATGACCCAAGGATTTCGAGACGGGTTGGCGATCGCCTATCAAAATCGGCCGGACATTTTTGCCTTGGAGATTAAA…	MTKFFVDRGGTFTDIVAITKDTKLAQHSAKDRRFSVFILPTKETVILFKLLSENPELYDDAVIHGIRIILGLSSNEPIAPEKVSMVKMGTTVATNALLEQKGDPLVLVMTQGFRDGLAIAYQNRPDIFALEIKKPSLLYGPVIEAMERINAQGEILQPLDKHRIHQDLQQAYDQGIRSVAIALMHSYLYPDHELIITEIAQNIGFTQISRSSEVSPLIKYIYRGDTTVVDAYLSPLLRRYVDQVQGQLPGITVQFMQSHGGLVDGSHFQGRDSILSGPAGGIVGAVKTSQRAGFRNIITFDMGGTSTDVAHFNGTYERLWETEIAGVRLRVPSLAIHTVAAGGGSILHFDGQRYQVGPDSAGANPGPACYRRGGPLTVTDANVMVGRVQKSYFPPVFGP…	5-oxoprolinase homolog	5-oxoprolinase homolog
NC_000911.1:2340322-2344056:+	NC_000911.1	HRIBO	CDS	2340322	2344056	+	slr0359			3735	1245	Yes	0.133823	0.99037	0.562097	0.113338	0.719506	0.416422	12.02	40.11	89.82	40.5	89.82	40.5	10.18	29.14	ATG	TGA	CCCCCTCCCATCCCC	ATGGACAAGGGAGGAAAGACCTATAATTTGGCCATGATCCCCGGGGATGTTGTGACTCCGGGGACGCCTTTTTTCGCTCAGATGCCTTGGATGAACATTTGGTCTCGTTTCAAGTTTCCCCCGATGCCATGGTGGGTTGCTAAACAAAGAAGCTTGGGGGGATTATCCCTGACTCCTAGTTTGTGGGAATTGGAACGGGACAACCAAGAACGTAAACCCACCGCCACTAATTTGGAGCATCGACAACAGCGGGAAATTGACCAACTCAAACGGCAGTTACTGGAAGCGGAACAAGCGAAGGAAAAATTAGCCCGGGAATTAGCCCAACATCAGAATTCGCCGTCCCAACCCCCGCCTCCCGTTTCCGGTTTGCAAACGGCTTTAGCTCGCCTGGGACAG…	MDKGGKTYNLAMIPGDVVTPGTPFFAQMPWMNIWSRFKFPPMPWWVAKQRSLGGLSLTPSLWELERDNQERKPTATNLEHRQQREIDQLKRQLLEAEQAKEKLARELAQHQNSPSQPPPPVSGLQTALARLGQWGILSRDLYGFFDQATELIRTALGVDYCGLWELLPNRSALVLCAGDGWDKALVGNYTIDATNRSYAGYTIQHNGDRRMEDYEPIVELDLRISTKFRASPLLHNLGIVSGINLMVAGPRTAFGVLGVYSLTARKFTEEEIEFLKVASHILAAAIDRQEYEERLLLLQQAIDASSNGILITDALGSDNAVVYANQGFETITGFNREEVIGQNCRFLLNEDRQGEQNKQLEKLRTAIAHGQECEVVLKNYRKDGASFWNHLYLSPIYNQ…	hypothetical protein	hypothetical protein
NC_005231.1:32698-36411:+	NC_005231.1	HRIBO	CDS	32698	36411	+	slr8038	SGL_RS01315		3714	1238	Yes	0.310688	1.47173	0.891211	0.176871	0.374557	0.275714	5068.59	15907.8	16314.1	10808.9	16314.1	10808.9	2885.48	4048.55	ATG	TAA	TGGGTAGTACTAACC	ATGCCGTTTGAAGATGCCCTTGCGATCGTTAATGCCGCCATGCAGACATTACTGGGGCGGCAACTCAGCGACATCGAAACTCTCATTTTTGAAGGTTCCTGGCAGAGCAAAACCTATCCTCAAATCGCCGATGGGGCCGGCTACTCCATCAACTACCTGACCACCGACGTCGGCCCCAAATTCTGGAAAGTCCTCAGCCAAGCTTTGGGAGAACCTGTCAACAAGAAAAACTTCAAGGCCGCAATTCGAAGGTATTGTGTAGTCCAATCGGGGGGCGAGTGGGAGAGTGAGGGTTTTCAGACCCAGTTACCCAGCTACCCATCTATCCTCTCCTGGGGCGAAGCACCGGATGTCAGCCAGTTTTACGGACGGGAAGAGGAACAAGCTCTACTACAACGC…	MPFEDALAIVNAAMQTLLGRQLSDIETLIFEGSWQSKTYPQIADGAGYSINYLTTDVGPKFWKVLSQALGEPVNKKNFKAAIRRYCVVQSGGEWESEGFQTQLPSYPSILSWGEAPDVSQFYGREEEQALLQRWIEAERCRLIAVLGMGGIDKSTLTTKVVQGFVQGDGVEEWEGDNINIKKIQNPLQEGQSPTKFKIQHLPSSPATPFTHIIWRSLRNAPPLEALLAELIDLLSEHQETVGDRARLLHWLRKTRCLIVLDNLETILQAGDHAGYYRDGYGDYGELIQLLGETPHQSCVLLTSREKPAEIAVLEGLDGNTRTLQLSGSVATAIAIIQQKGLQGTEEQQQVLCDRYSYNPLALKIVSTTIQDLFDGDISAFLTEDAVIFNSIRRLLDAQF…	WD repeat-containing protein	Derived by automated computational analysis using gene prediction method: Protein Homology.
NC_005232.1:82675-86385:+	NC_005232.1	HRIBO	CDS	82675	86385	+	slr6090			3711	1237		3.38718	2.36857	2.87787	3.23423	1.34032	2.28727	1778.54	1929.01	525.08	814.42	525.08	814.42	1698.23	1091.58	ATG	TGA	AAGGAGGCTTCTGAG	ATGAAGCATTATAAAACTTCACACGGGTCCTATTCTAGCGCATTCTCCCCCCTCCTAGTCAATAACCCGAACCATTCCAGCTTTGGGGAGAACAAATTACAACCCACCAGCCGCCACAATCCTTGCCCAGTCTGCGCTAAAACCAATGGCAATTGCCGCACCATAGCCGATGGTGGGGTGCTGTGCATGACTTTCCCCGACGGAGATGGTCATCCCGATCATCGCTACGTCAAACCCAGTGAGAATGGACTTTGGGGTGTTCATTACCCCCGCAAGGATGGTGATTTTGACCGACAAGCCTGGGAAAAAAGGAAGGAGGAGAGGGAAACCAGAAATCAGGAAATTGAACGGCAAAGCCGAGAAAAATGTCTCAGCCCAGAGCAACGGGATAGGGGCTAT…	MKHYKTSHGSYSSAFSPLLVNNPNHSSFGENKLQPTSRHNPCPVCAKTNGNCRTIADGGVLCMTFPDGDGHPDHRYVKPSENGLWGVHYPRKDGDFDRQAWEKRKEERETRNQEIERQSREKCLSPEQRDRGYKAILDQLTLTDEDRSYLEGRGILPEVIARCRSVKKWQKLSHTAHVNLPGVNRYGSGLNNPADGILIAIPGIGGYLTNLRLNVPLDLNRKYSAISSANRGLKPNLEDGGTPFGIFFPENWTDFTHIGICEGPEYKAPSAAQRLNFPVVGFEGAAGMTTIKRYPARLKQIEDYVKEQLCKLTKNEYLKLSSVWQSTMMSFATFLTGQTTKDTQTEYSFPVQISAQFAFKILGVCLFPTMNGQKIGTIFTESKKLLKEWSTPSSFGTKE…	hypothetical protein	slr6090_Derived by automated computational analysis using gene prediction method: Protein Homology.
NC_000911.1:2569772-2573401:-	NC_000911.1	HRIBO	CDS	2569772	2573401	-	sll0068			3630	1210	Yes	0.311281	2.94169	1.62649	0.196494	1.59782	0.897157	11.01	53.98	35.37	18.35	35.37	18.35	6.95	29.32	ATG	TGA	TTGTTGGCAACTACC	ATGGTCCACTCCTCCAGCCTTTCAGGGACAGCGAACAATCACCACGGTCAAGAAAATAACCAGGAAAGTTCCCCGAATGTCCCCGACTGGGCCACGGTATGTCAACAGTTGCTCTACCGGGCTCTCCCCTGCACCTCAGTGCAAACTCAGCCGGAATGGGTTGTGAAAAAAGCCGGTCGCATTCCCCGTTCCCTTAAGGTTATTGCCAGCGGATCTACCGGCGGCCACAACGCCCCGGCTAGCTATGGCCCCCTGGAATTTTTGGACAGTTTATTAACTCCCATCGCCGAGGGAGGGGAAAAAAGCCGTTACCTGGCGATCGTGGGGGAAGCGGGATCTGGGAAAACAATTTTTTTGCAACATTTTGCCCAGGGGCTCTGGCAACGCCACCAAGAAGGC…	MVHSSSLSGTANNHHGQENNQESSPNVPDWATVCQQLLYRALPCTSVQTQPEWVVKKAGRIPRSLKVIASGSTGGHNAPASYGPLEFLDSLLTPIAEGGEKSRYLAIVGEAGSGKTIFLQHFAQGLWQRHQEGQAHCLPIWLNPSRFKHRSIKDYLFGPWLQEAMALEEEIPPATWRDSLLLGLQTGQFWLVLDGIDYTFTDPSQMSGAQGSLTWLKDSLAEVPTTPVLLSCRPDTRRNDPRGLAGFTRYQIEPLVYPDNVEIAIEDYFSADRPGQPENPGKPNALANALKEALANPSVRYLRPYLLRPRRLMLCCRFWADQPRDFPVSSGALYNKLVKAFYLWQSEWAPTKPGQQDELAQLLGQLAKQMLGENRADHRPLAPVEVEKIFGKDSPLLRS…	unknown protein	unknown protein
NC_005229.1:14340-14639:-	NC_005229.1	HRIBO	CDS	14340	14639	-	MYO_RS16585	SGL_RS00025		300	100		0.217521	1.11303	0.665274	0.0799338	0.489648	0.284791	854.15	1808.49	3926.75	1624.84	3926.75	1624.84	313.88	795.6	ATG	TAG	AGTGATAGCTTCCCA	ATGGATTACGAAGGCGAAGGCTTACCAGAGCAACCAGAACCATGGTCCACTGGCGGCCTAGGGGATAGGGATGAATGGGAGCTGGCCCCACCGGCCGGGGAAGCTTGTTATCGGCAACCGGAGCTGGAAGGGCTACTCCATTCCCTTTATTCCGCTCGGTCAGTGTTGGTGACATCGGGGGAAGGCATGGGCAAAACCTATCTGGTGCGGCAGGTGTGGGAACGACTGTTATCCGATGGGGTGACGTGCCAATACTTTGAACCAGCTACCCCCAAAACCCTCCTGATGGCGATGGCTTAG	MDYEGEGLPEQPEPWSTGGLGDRDEWELAPPAGEACYRQPELEGLLHSLYSARSVLVTSGEGMGKTYLVRQVWERLLSDGVTCQYFEPATPKTLLMAMA	ATP-binding protein	Derived by automated computational analysis using gene prediction method: GeneMarkS+.
NC_000911.1:869668-873270:-	NC_000911.1	HRIBO	CDS	869668	873270	-	sll1120	SGL_RS05960	smc	3603	1201	Yes	0.392901	3.20568	1.79929	0.166055	1.56178	0.863918	9.63	41.77	24.51	13.03	24.51	13.03	4.07	20.35	ATG	TAG	CCGTCCCCAACCTCC	ATGGTTTATGTCAAGCGCATCGAACTATCCCATTTCAAATCCTTTGGGGGAACCACCGCCATTCCTTTTTTGCCGGGGTTTACGGTGGTGTCTGGGCCCAATGGTTCGGGCAAGTCAAATATCCTCGATGCATTGCTATTTTGTTTGGGGTTAGCCACTTCCAAGGGCATGCGGGCTGAACGACTACCGGATTTGGTCAATAACACTTTCAAGGGGAACCGGGGCAGTTCCGAAGCTAGTGTGTCAGTCACCTTTGAATTGCATGATGGGGAAAACCTATCCGAGCCAGGGGCTAACCATAATGGCAACGGCAACGGAGCAAAAATTTCTAAGGAATGGACTGTTACCCGTCGCCTGAAGGTGACCAAAGGGGGCAATTATTCCTCCAACTATTACATC…	MVYVKRIELSHFKSFGGTTAIPFLPGFTVVSGPNGSGKSNILDALLFCLGLATSKGMRAERLPDLVNNTFKGNRGSSEASVSVTFELHDGENLSEPGANHNGNGNGAKISKEWTVTRRLKVTKGGNYSSNYYINGETATVTELHEQLNELRIYPEGYNIVLQGDVTRIITMNSKERREIIDELAGVAEFDRKIVKTKETLTEVQDREERCQIIATELERTLERLAADRQKAEKYQALRQQVQEKQGWAKVIQYKAVEQQRQKLWGQLERDREQSQQIQQALDQRSQAIQTQQTELEKLNAQVKALGEEEQLAVAAQLATQKAQRDQLQQRYNDGDRQITNHQQQVGQIQAEISQSQQQFLHIQQEKSFHNTQTLPQLEAAVQTSQQQLEQLRHQAQAIA…	chromosome segregation protein SMC1	chromosome segregation protein SMC1
NC_000911.1:3128387-3131986:-	NC_000911.1	HRIBO	CDS	3128387	3131986	-	sll0741	SGL_RS16420	nifJ	3600	1200	Yes	0.734331	4.44228	2.5883	0.377923	2.85366	1.61579	7.85	27.32	10.69	6.15	10.69	6.15	4.04	17.55	ATG	TAG	GAGGACGATTCGTTT	ATGAGTTTACCTACCTATGCCACCCTCGACGGTAATGAAGCGGTGGCCCGTGTGGCCTACCTGCTCAGTGAAGTGATTGCCATTTATCCCATCACCCCTTCCTCGCCCATGGGGGAATGGTCCGATGCTTGGGCAGCAGAACACCGGCCCAATTTGTGGGGCACCGTACCATTGGTGGTGGAAATGCAAAGCGAGGGGGGAGCCGCCGGTACTGTCCATGGCGCTCTGCAATCGGGAGCTTTGACCACAACATTTACCGCTTCCCAGGGCTTAATGTTGATGTTGCCCAATATGCACAAAATTGCTGGGGAATTAACAGCCATGGTTTTGCATGTGGCGGCCCGTTCTTTAGCGGCCCAGGGCCTATCTATTTTTGGGGATCACAGTGATGTGATGGCG…	MSLPTYATLDGNEAVARVAYLLSEVIAIYPITPSSPMGEWSDAWAAEHRPNLWGTVPLVVEMQSEGGAAGTVHGALQSGALTTTFTASQGLMLMLPNMHKIAGELTAMVLHVAARSLAAQGLSIFGDHSDVMAARNTGFAMLSSNSVQEAHDFALIATATSFATRIPGLHFFDGFRTSHEEQKIELLPQEVLRGLIKDEDVLAHRGRALTPDRPKLRGTAQNPDVYFQARETVNPFYASYPNVLEQVMEQFGQLTGRHYRPYEYCGHPEAERVIVLMGSGAETAQETVDFLTAQGEKVGLLKVRLYRPFAGDRLVNALPKTVQKIAVLDRCKEPGSIGEPLYQDVLTAFFEAGMMPKIIGGRYGLSSKEFTPAMVKGVLDHLNQTNPKNHFTVGINDDL…	pyruvate flavodoxin oxidoreductase	pyruvate flavodoxin oxidoreductase
NC_000911.1:2751026-2754613:+	NC_000911.1	HRIBO	CDS	2751026	2754613	+	slr0212	SGL_RS14710	metH	3588	1196	Yes	0.554549	3.75316	2.15385	0.0922003	0.592468	0.342334	45.29	145.51	81.67	38.77	81.67	38.77	7.53	22.97	ATG	TAA	GTCTCCGACCTCCCT	ATGAAAAGTGCTTTTTTAGACCGTATCCACAGTCCCGATCGCCCGGTATTAGTCTTTGACGGGGCTATGGGTACAAACCTGCAGGTACAGAACCTAACGGCGGCGGATTTTGGTGGGGCGGAATACGAAGGTTGCAATGAATATTTAGTCCATACCAAGCCAGAGGCCGTGGCTACGGTGCATCGTGCTTTTTACGAAGCGGGGGCCGATGTCGTGGAAACGGATACTTTTGGGGGAACGCCCCTGGTGCTGGCGGAGTACGATTTAGCAGACCAAAGTTATTACTTAAATAAAGCAGCGGCGGAGTTGGCCAAGGCGGTAGCAGCGGAATTTTCTACCCCAGAAAAGCCTCGATTCGTGGCCGGCTCCATGGGACCAGGCACCAAGCTACCCACCCTA…	MKSAFLDRIHSPDRPVLVFDGAMGTNLQVQNLTAADFGGAEYEGCNEYLVHTKPEAVATVHRAFYEAGADVVETDTFGGTPLVLAEYDLADQSYYLNKAAAELAKAVAAEFSTPEKPRFVAGSMGPGTKLPTLGHVDYDSLKDAYVVQVRGLYDGGVDLLLVETCQDVLQIKAALNAIEQVFAEKGDRLPLMVSVTMETMGTMLVGTEMAAALAILEPYPIDILGLNCATGPDLMKEHVKYLSEHSPFVVSCIPNAGLPENVGGQAFYRLTPMELQMSLMHFIEDLGVQVIGGCCGTRPDHIKALADIAKDLQPKQRQPHYEPSAASIYSTQTYAQENSFLIIGERLNASGSKKCRDLLNAEDWDSLVSLAKSQVKEGAQILDVNVDYVGRDGVRDMKE…	5-methyltetrahydrofolate--homocysteine methyltr ansferase	5-methyltetrahydrofolate--homocysteine methyltrans ferase
NC_000911.1:2173197-2176772:+	NC_000911.1	HRIBO	CDS	2173197	2176772	+	slr0143	SGL_RS12100	hat	3576	1192	Yes	0.343825	2.08445	1.21414	0.225795	2.15022	1.18801	10.05	27.89	29.23	13.38	29.23	13.38	6.6	28.77	ATG	TAA	AACATAGCTGAAACA	ATGTCGCCGATCGCCCTCAATTTATTGCAGTCAACCCCCTATCAGGTGGGGGGGAGCTTGGCCGCTAATCATCCCAGCTACAGTCAACGGGAAGCGGATCGGGAACTATTGGCCCAGTTGCGAGCGGGCAAATTTTGCTATGTGTTCAACTGCCGGCAGATGGGTAAATCTAGCCTGCGGGTGCGGGCCATGCATCAACTGCAACAGGACGGGGTGGTGTGTGTGTCCATTGACATCACCAGTTTAGGCACCGAAGCTGACCCTCAGAAGTGGTATAACGGCATTATTACCCAGCTTTACCTCGGTTTGCCTTTGGCGGGGAAGGTGGCCCTCAAGCCTTGGTTACGGGAGCGGGAACAACTCAGTCCCATTCAAAAGCTACGGGAATTTGTTGAAACA…	MSPIALNLLQSTPYQVGGSLAANHPSYSQREADRELLAQLRAGKFCYVFNCRQMGKSSLRVRAMHQLQQDGVVCVSIDITSLGTEADPQKWYNGIITQLYLGLPLAGKVALKPWLREREQLSPIQKLREFVETIILQTIGDRQIVIFIDEIDKVLSLPFSLDDFFSYIRFCYNQRADDHEYNRLSFALFGVATPSDLIDNKTQTPFNIGQAIALTGFTLTEALPLSAGLPVDEVSAREILGEILAWTGGQPFLTQKVCELVAEALQKGDLDCQSQTIATTIAQLIEEKIIRHWESNDEPVHFRTIGDRLLKDQARSGQLLGLYQEILHKGAIPADDSVEQTVLRLTGLVVKVKGQLRPYNPIYQAIFNAQWVSKELNKLRPYGTNLQAWINSNYQDSSR…	WD-repeat protein, Hat protein, involved in the control of a high-affinity transport system for inorgani c carbon	WD-repeat protein, Hat protein, involved in the co ntrol of a high-affinity transport system for inorganic c arbon
NC_000911.1:2518321-2521857:+	NC_000911.1	HRIBO	CDS	2518321	2521857	+	slr0222	SGL_RS13585	hik25	3537	1179	Yes	0.504955	1.96967	1.23731	0.338454	1.91882	1.12864	10.19	22.08	20.18	11.21	20.18	11.21	6.83	21.51	ATG	TGA	TTGACCTTGGAACCC	ATGCCTATCATTCCTAGCCCCAAAGTCCTGTTAGTGGATGATCAGCGGGAAAATCTTGTTGCTCTGTCACGGGCCCTGGATTCCCTGCCAGTGGAAATAATCACCGCTAACTCCGGCCAAGAGGCGATCGCCACCGCCGCCACCACAGAATTTGCCTTGATGATTTTGGCCCAGGAAATGTCTGAATTGGACGGGCTAAACACCGCTAAAATTCTTCGTTCTTTTCCCCTGGCTGAACAAACTCCAATTATTTTTCTAGCTCGGCAAGAAATTATCACCAAAGCAATGGCAGAAATAAATATTTTGGGGTTGGTTGACTTTCTGGCACAACCGCCTAACCAAAATTTTCTTCAGGTGAAAGCTAAACTTTATTTGCAGCTTTTCCAGCAGAAACAAACT…	MPIIPSPKVLLVDDQRENLVALSRALDSLPVEIITANSGQEAIATAATTEFALMILAQEMSELDGLNTAKILRSFPLAEQTPIIFLARQEIITKAMAEINILGLVDFLAQPPNQNFLQVKAKLYLQLFQQKQTLQYYNNYLESSVKSVHFDVKNNHSEQLSEIILANISDTVFVTDLSGKFTFICSNIDNIFGYSLAEVNAMGTVETLLGDFRFNEYELKEKGELKNLRHDVQDKQGKIHYLLINLKKVAINGGIYLYSCRDISEWARKEQAIRNSEANFRDIFASIKDGLLVLDEDNYICYANAQAVKLLNCTLEELVGTIGSPLEDTEFSLLVDDGTIYTVDVSVTEITWYGQTAKLVSLRDISDRKRMENQLRENQNKYYRLLENLDNGVIVHNAN…	two-component hybrid sensor and regulator	two-component hybrid sensor and regulator
NC_000911.1:2057469-2060975:-	NC_000911.1	HRIBO	CDS	2057469	2060975	-	sll1527	SGL_RS11605		3507	1169	Yes	0.263379	1.66555	0.964466	0.175586	0.920847	0.548217	4.38	14.94	16.63	8.97	16.63	8.97	2.92	8.26	ATG	TGA	TATTTTGCTCTGGTA	ATGAAAAAATTTGTTGTTATTGACCATTCCCTGTGCAACTTGCAAGGACATCACTATGAGTGTAGTGTTGCTGTGGCAGAAGCAGCCCAGAGACAAGGCTATCAACCGATTATCATTGCCAATCAAATTCTGAAGGAGTCTTTAGCGGCTGGAGATATAAAAATTATTCCAGCTTTTCAAGTAGATTGGTTCAACCAGCCAACCAATGGCGAAAATATAGAATCTATTGCCCCCGATTTATTAAATCTAACCCAACCTTGGCAAGAAAGGTGGCGTCATCAACTTTATCTGTGGCAACAAAATCATCCAGAACTAAGAATACTTTTGGAAAAAGTAAAAGGTAGCACCCAACGGTTGAAAGGGTGGTTTAAAGCCGATCTTAGATCTTTGCGGTCCATA…	MKKFVVIDHSLCNLQGHHYECSVAVAEAAQRQGYQPIIIANQILKESLAAGDIKIIPAFQVDWFNQPTNGENIESIAPDLLNLTQPWQERWRHQLYLWQQNHPELRILLEKVKGSTQRLKGWFKADLRSLRSIPLANTTWGLLKILWGVTRLVGKISIKIINKTVDKFNQSEGNSVVETKSFTQTLEEILPALELTAADHILIHTFGIEQLEELFYFLNNQNQDDLPTYHLLFRRDTEDPLVVNATGIGLKKCLEKFCQTELWPGKIRFYTDTKDLVRKHNQLSPAIFTQVPIPFRQEKLKLENFHKGDSNKNFVHIIYLGDARSEKGYQHLPVLVADLWTDYLKPGLAKFTIQSNYNVVGGEEVILEAKLKLCQYPCSAVELIDHALEPDAYYHLLAS…	unknown protein	unknown protein
NC_000911.1:2701931-2705419:-	NC_000911.1	HRIBO	CDS	2701931	2705419	-	sll0377		mfd	3489	1163	Yes	0.587008	4.19048	2.38874	0.389768	1.41485	0.902309	17.44	51.92	29.71	12.39	29.71	12.39	11.58	17.53	ATG	TAG	TCTGCTCTGAACCCA	ATGACCTTTTCCTCCATACTCCGCCATCTGCAAACCTTACCGTTGAGCAAAGACCTGCGGGAAAAATTGCAAAAGCGGGGCCATGTGCAACTCAGTGGCCTACCCCGGTTACCCAAAGGCCTAATCGTTTCCAGTTTGGCCCAGTCCCTGGAGAAAAATCTTTTGGTCATCACTGCCACGTTGGAGGAAGCGGGGCGCTGGACAGCCCAGTTGGAACTGATGGGTTGGCAAACCGTTAATTTTTACCCCACTTCTGAAGCTTCCCCCTATGACCCTGGGCGACTAGAGTCGGAAATGGTTTGGGGACAAATGCAGGTGTTGGCAGAATTAATCCAGGGCCATCAGGTTAAGGGCAAGGCGATCGTCGCTACAGAAAAGGCCCTACAGCCCCATTTACCC…	MTFSSILRHLQTLPLSKDLREKLQKRGHVQLSGLPRLPKGLIVSSLAQSLEKNLLVITATLEEAGRWTAQLELMGWQTVNFYPTSEASPYDPGRLESEMVWGQMQVLAELIQGHQVKGKAIVATEKALQPHLPPVATLREYCLALRRGQEMDSKSLELTLARLGYERGSTVETEGQWSRRGDIVDIFPVSAELPVRLEWFGDELEKIREFDPASQRSLDDLTGLVLTPTSFDQVIEPALNAQAIDLSAWGEDAETEQLFGKEGLQRFLGLAFTEPACLLDYLPTETVCVLDEPEQCAAHSERWFEAVAQDWSALQLPNLPQLHRNFSALGDRLKTDFQYITLSEIHEANGDSLDISARPIPTMPHQFAKLAEILRGKREIYSGLTLGQYSTWLISAQPS…	transcription-repair coupling factor	transcription-repair coupling factor
NC_005232.1:43696-47151:+	NC_005232.1	HRIBO	CDS	43696	47151	+	slr6047	SGL_RS01585		3456	1152	Yes	3.8859	3.49574	3.69082	6.07492	3.49454	4.78473	10639.5	9698.06	2737.97	2774.25	2737.97	2774.25	16632.9	9694.72	ATG	TAA	AAGGGTTAAACGTCC	ATGTCTTCAATCTATGACAATTGTGATTTTCCTCTACTGCCAGAGCTTAAGCATTGTCTAAAGGAAGGTTATCGTTCGGATTTTTGTGTTGGCTACTTTAACCTGCGTGGTTGGCGAGAGTTAGAGGATGAAGTCGAGCAATTTACTGCCGGGAAAGGTCAAAATTGTCGTTTACTGGTGGGGATGCAGAGGCCGCCTAACGATGAACTTAGGCGTAGTTTATCTATTACGAAGCGTGCAAATCAGCGGATGTCGAACGAACAGGCAAATAAGTTGAAAAAGATTATGGCTCATGAGTTTCGAGAGCAGTTAACCTATGGCGTTCCTACTGCAAGGGATGAAGCAAGTCTCAAACGATTAAAAGCGCAATTGCAAGCTGAAAAACTAGAAGTTAAACTA…	MSSIYDNCDFPLLPELKHCLKEGYRSDFCVGYFNLRGWRELEDEVEQFTAGKGQNCRLLVGMQRPPNDELRRSLSITKRANQRMSNEQANKLKKIMAHEFREQLTYGVPTARDEASLKRLKAQLQAEKLEVKLFLRHLLHAKLYLIHREDKITPRIGYVGSSNLTFSGLSGQGELNVEVTDRDDTKKLEEWFIERWEDNFSLDISQDLIKVIDESWAGKQLPPFYIYLKMAYHLSQEARDGLSRYQAPKNFGLLEFQEQAVRVAMQHIDKRNGVVIGDVVGLGKTLVGTAIAHVCEEEYGTSTLIICPKNLESMWQGYVDRYGLRGKVVPISQVEQRLPEVPARFRLVLIDESHNLRNREGKRYQAIKEYIEQSGSRCILLTATPYNKGYLDLSSQLRL…	helicase	slr6047_Derived by automated computational analysis using gene prediction method: Protein Homology.
NC_005232.1:27957-31322:+	NC_005232.1	HRIBO	CDS	27957	31322	+	slr6031	SGL_RS01515		3366	1122		1.96719	1.98067	1.97393	1.68653	0.96963	1.32808	557.58	802.19	283.44	405.01	283.44	405.01	478.03	392.71	ATG	TGA	AAGGAGGCTTCTGAG	ATGAAGCATTATAAAACTTCACACGGGGCCTATTCTAGCGCATTCTCCCCCCTCCTAGTCAATAACCCGAACCATTCCAGCTTTGGGCAGAACAAATTACAACCCACCAGCCGCCACAATCCTTGCCCAGTCTGCGCTAAAACCAATGGCAATTGCCGCACCATAGCCGATGGTGGGGTACTGTGCATGACTTTCCCCGACGGAGATGGTCATCCCGATTATCGCTACGTCAAACCCAGTGAGAATGGACTTTGGGGTGTTCATTACCCCCGCAAGGATGGTGATTTTGACCGACAAGCCTGGGAAAAAAGGAAGGAGGAGAGGGAAACCAGAAACCGAGAAATTGAACGGCAACGGCTAGAGAAATGCCTAGACCCGGATCGTCGGGATGCTGAAATA…	MKHYKTSHGAYSSAFSPLLVNNPNHSSFGQNKLQPTSRHNPCPVCAKTNGNCRTIADGGVLCMTFPDGDGHPDYRYVKPSENGLWGVHYPRKDGDFDRQAWEKRKEERETRNREIERQRLEKCLDPDRRDAEIRGILSQLTLTDGARRYLENRSVPPEIIDRCRSVKRWQKLAQPAHVNLAGVSKLGNQLNNGWDGILEVVPDHLGRLIAMRLHDPDHKTTGNPKYVWLSSKKRGITPHLANGENPIGLFWPGGLASTAKPQRIGLCEGLEFKAPAAANRLEFPVIGFSGYQFLQSPETLKEIITNLNPDAQLVLIPDGGSVQDARISRSHGETLATLTNPVTVAWWGQFTKADGDIDEIAGDRLVEFISPEQFLSYCPQRPKSKVEQFADWITKQVKR…	hypothetical protein	slr6031_Derived by automated computational analysis using gene prediction method: Protein Homology.
NC_000911.1:716309-719665:-	NC_000911.1	HRIBO	CDS	716309	719665	-	sll1582	SGL_RS05205		3357	1119	Yes	0.31989	1.51382	0.916855	0.0898258	0.667085	0.378456	3.49	12.05	10.91	7.96	10.91	7.96	0.98	5.31	ATG	TAG	TACTGAACATTGTTG	ATGAACGATAAGCAAAAAGCTTCAGGAATATGCGAAAGTTTATACTTACTTGGTGAAGCTAAGCTGAGCTTAAAGGAAAAATTTTATGAAATCTCTAAGCTTTTTTATCAGTTCATCAAAGCTTTTACTGAACCTGAAAATATAGTTTTCAGAAATTTTTATGCAAAATTTAGGTATTGTATTAGCAAAATAAATCTAGACGAAGAAGATGTAAGCAATTTTGAAGCTTTCCGGAAATTTATCCGCAGGGGATTTTCTGAAAAAGTCAACCAAGTTGCCATTGAGCAAGGAATCTTGTTGCTCCAAAAATTATGCCTGCAAGCAACTGAAAATTCCGAACTACTGGGATTCACTTTTGACAATAGTAAATATAACAATCAATATTTTACCAAGCTTTTT…	MNDKQKASGICESLYLLGEAKLSLKEKFYEISKLFYQFIKAFTEPENIVFRNFYAKFRYCISKINLDEEDVSNFEAFRKFIRRGFSEKVNQVAIEQGILLLQKLCLQATENSELLGFTFDNSKYNNQYFTKLFQARRSPSTKYLKLLYTGHHRSQSKRAFHLYGFDLENLQTNIVIECDWFNAPHLFYLIDILKEDTLIACHNLVPVAENKYQAKSESLIVIEPDFLVDASAISECFGNKNTSSDIFWLTKLVGELAGAAAFKGTIVGYCLDELVRNKQINIAQIFTDYKKSDALRSAYLGEQEMTNIQTSIVQEHLPNISQLVQRLQAENLRIWIEPTFFSQHYGLQGRLDLLTIDSNGSKDIIELKSGGAPYPGREWKNHKMQVVAYNMMLESTYGN…	unknown protein	unknown protein
NC_000911.1:1065660-1069010:-	NC_000911.1	HRIBO	CDS	1065660	1069010	-	sll1360	SGL_RS06875	dnaX	3351	1117	Yes	0.34965	2.04167	1.19566	0.258741	1.2585	0.758622	7.5	24.01	21.45	11.76	21.45	11.76	5.55	14.8	ATG	TAG	CCCGGTTACCTTGCC	ATGGCCTACGAACCTCTGCACCATAAATATCGCCCCCAGACCTTTGCAGATTTGGTGGGCCAAACGGCGATCGCCGCCACATTGAGCAATGCCATTGAACAGGAGCGCATCGTACCTGCTTACCTATTTACGGGCCCCAGGGGAACGGGAAAAACTTCTTCAGCCCGAATTTTAGCCAAATCCTTAAACTGCATCGCTGGCGATCGGCCTACTGCCACTCCCTGCGGCCAATGTGCCACCTGTCGGGCTATTACTAACGGTTCAGCTTTAGACGTAATTGAAATTGATGCGGCCAGTAATACAGGGGTAGATAATATCCGAGAAATTATTGAACGGGCTCAATTTGCCCCAGTACAGTGCAGATATAAAGTATATGTGATCGATGAATGCTTAACGGGG…	MAYEPLHHKYRPQTFADLVGQTAIAATLSNAIEQERIVPAYLFTGPRGTGKTSSARILAKSLNCIAGDRPTATPCGQCATCRAITNGSALDVIEIDAASNTGVDNIREIIERAQFAPVQCRYKVYVIDECLTGDSQVLTRNGLMSIDNPQIKGREVLSYNETLQQWEYKKVLRWLDRGEKQTLSIKTKNSTVRCTANHLIRTEQGWTRAENITPGMKILSPASVDVDNLSQSTALTASLGGLSGAINYEAINTDKKNTTLSLSLKKQKPQDPFVNADVAKNLIFQHFCSAKEEKLKVSNPIGEDIPTKKATDFGISEQKKLHQGQNRWEQKFSVLSTEPCLGMEVLTIPTHIADSPACDGPTAPSSQNGWNIKRQDWDVCHPKYDSQPIKAMGKVPSAV…	DNA polymerase III subunit gamma/tau [Contains: Ssp dnaX intein]	DNA polymerase III subunit gamma/tau [Contains: Ss p dnaX intein]
NC_000911.1:857558-860866:-	NC_000911.1	HRIBO	CDS	857558	860866	-	sll1787	SGL_RS05930	rpoB	3309	1103	Yes	0.624787	8.74391	4.68435	0.140932	1.81396	0.977446	113.58	685.26	181.79	78.37	181.79	78.37	25.62	142.16	ATG	TAG	GACTTCTGAGCCACC	ATGACAAACCTTGCCACCACGATGTTGCCCGATTTAATTGAAATCCAACACGCTAGTTTCCACTGGTTTTTGGAGGAAGGTTTAATCGAGGAATTGAATAGTTTTTCGCCGATTTCTGACTACACAGGCAAGCTGGAACTCCACTTTTTGGGCAAAGATTACAAGCTCAAACAACCCAAGTATGATGTTGATGAATCCAAGCGACGGGATGCTAGTTATTCGGTGCAGATGTATGTGCCGACCCGTCTGATTAACAAAGAAACCGGGGAAATTAAGGAGCAGGAAGTCTTCATCGGCGATCTCCCCCTAATGACAGAGCGGGGAACCTTCATCATCAATGGTGCGGAGCGGGTCATCGTTAACCAAATTGTGCGATCGCCAGGGGTTTACTACAAAAAA…	MTNLATTMLPDLIEIQHASFHWFLEEGLIEELNSFSPISDYTGKLELHFLGKDYKLKQPKYDVDESKRRDASYSVQMYVPTRLINKETGEIKEQEVFIGDLPLMTERGTFIINGAERVIVNQIVRSPGVYYKKELDKNGRRTYSASLIPNRGAWLKFETDKNGLVYVRIDKTRKLSAQVLLKAIGLSDNEILDSLSHPEFYQKTLDKEGNPTEEEALVELYKKLRPGEPPTVSGGQQLLESRFFDPKRYDLGRVGRYKLNKKLRLNEADTTRVLTPQDILAAINYLINLEFDVGTTDDIDHLGNRRVRSVGELLQNQIRVGLNRLERIIRERMTVSESDALTPASLVNPKPLVAAIKEFFGSSQLSQFMDQTNPLAELTHKRRISALGPGGLTRERAGF…	RNA polymerase beta subunit	RNA polymerase beta subunit
NC_005232.1:47827-51129:+	NC_005232.1	HRIBO	CDS	47827	51129	+	slr6050	SGL_RS01600		3303	1101	Yes	5.32464	4.75564	5.04014	0.618031	0.534876	0.576453	7694.59	6499.49	1445.09	1366.69	1445.09	1366.69	893.11	731.01	ATG	TAG	TTAAAAGATTTTTTT	ATGAAATTGAACCGTACAAGTACCCAAAAATATCTTAAGAATTTTGATTTTGAATCTCTTTTTATCGAAGAATTAGGTTGGGATACAACCGACCCAATAGCATTGCCGTTAGAAATTGATGAGGCTATTTTTGAAGCGATTGCCATTGCCCAGAAGCGTGGTTTTACGGCGTATTATTGTTCCACTACTGAGATTCCAGAGCGAAAGGTTAGGTTGGCTCTTGATCGTCAATTATCGGATTATTCTAAATCTCACTTATTAATTTTTGGGGATGAAGCGCAAACAGGACAGGTTTGGCTATGGGTGAGGCAGGAACTTGGAAAACCTTTAGCTCCTAAATTTGAACAATATCGGATTGGTCAATCGCCAGAACGGCTTTTACAGAAATTAGAAGCTTTG…	MKLNRTSTQKYLKNFDFESLFIEELGWDTTDPIALPLEIDEAIFEAIAIAQKRGFTAYYCSTTEIPERKVRLALDRQLSDYSKSHLLIFGDEAQTGQVWLWVRQELGKPLAPKFEQYRIGQSPERLLQKLEALAITFEEEECLTLVEVNRRVKKAFDVEKTTKKFYTEFEKQHKQFLKYIDGINNDFDRSWYASLMLNRLMFVYFIQRKGFLNRDIDYLQNRLKLCQEKFGNDEFYSFYRYFLMQIFHEGLGKSDRNQELDKLLGNIPYLNGGFFDVHQLEIKYENIQIPDDAFEQLFVFFGNWDWHLDNRITKNQNEINPDILGYIFEKYINQKQMGAYYTKEDITEYISKNTIIPFLFDATKKECEVTFRADGEIWSLLKENPNRYIYDAVLKGVDV…	hypothetical protein	slr6050_Derived by automated computational analysis using gene prediction method: Protein Homology.
NC_000911.1:2271581-2274868:+	NC_000911.1	HRIBO	CDS	2271581	2274868	+	slr0322	SGL_RS12550	hik43	3288	1096	Yes	0.53326	2.66003	1.59665	0.369689	0.951292	0.660491	86.98	241.93	163.11	90.95	163.11	90.95	60.3	86.52	ATG	TAA	GAGTAGCAAGAAGCA	ATGACTAGCGATCCCAATCCAGCCCAGGCATTTGAAAATTGGTTTGAGGAGGAAGAGGGGGATGACGCCTTTACTTCCCTCATTGCCGGTGAGGAGACTAACAGTGGGATTGAAGAACTGGATTTTGGCGATTTATTTGAGGGAGAACCCACCGTCATCCAGGGTGAAGGGTTTGGCTCGCCGTCCTCTGGAGAGGAAGATCCGCCGGTCCGCATGACCCTAGATTTTAATTCCCCGGAAGCGGAACTAGACGCTCTCTTTACCGATGAGGATGCCCCCACAACGGCGATCGATCCCTTTGAAAGCTCCAGTTGGCTAGAAATCGACCAGATGATGGAAGCTGATCCCCTGGCTTCCATTCCTGAGACCAATGCCCCCGCTTACCAGACCGCTGGTGGC…	MTSDPNPAQAFENWFEEEEGDDAFTSLIAGEETNSGIEELDFGDLFEGEPTVIQGEGFGSPSSGEEDPPVRMTLDFNSPEAELDALFTDEDAPTTAIDPFESSSWLEIDQMMEADPLASIPETNAPAYQTAGGLDDNDLAELQDLLGVGDVEPAITNPGLHSFAGADRVTPLTNEVLLFAAIDDLDGLINAPVLDEEFSFTELETLIDTPAPKSFATISHPFRLPVAMEEDEDEFKDLEALLEQADSSLGGGIAGMGGARLPARPRQVKSRSFEQTMRVPIKQLDNLSNLIGELVVKRNRLEQDQERLRQFLDNLLNQAQNLSDVGGRMQDLYERTLLEGALLASRSTNSRHHSSKTTYPDARITASSSSTMNDQPLDALEMDRFTGFHLLSQEMIELI…	two-component hybrid sensor and regulator	two-component hybrid sensor and regulator
NC_000911.1:893984-897262:+	NC_000911.1	HRIBO	CDS	893984	897262	+	slr1211	SGL_RS06070	cobN	3279	1093	Yes	0.613455	1.825	1.21923	0.216648	1.25227	0.73446	5.38	8.03	8.77	4.4	8.77	4.4	1.9	5.51	ATG	TAA	TTAAAAATACGTTTG	ATGCCTCAATTTAAAGCTATTACGACTATTGCAATTATTTTTTATCGTTCCCATTATTTGTCTGGCAATACAACTCCCATTGATGCTCTTTGTCAAGCTTTAGAAAAACATAATTTAAATCCCCTTGCTATCTATGTGTCTTCCCTGCGGGAGCCTGACGTACAAGCAGAAATTTTAGCTATTCTAGAAAATTTGGACCAGCCCTTGGGAGCTATTTTAAACACCACTAGTTTTTCCCTCGCCAAGTTACAAAGACAGATCGGCAATCTGGAAATGATTCCCCTCTGGCAAAAACTAAATGTCCCGGTGCTCCAGGTAATTCTTAGTGGTGGCGATCGCCAACAATGGCAGGAAGGGTTGCGGGGACTGAACCCACGGGACTTAGCCATGAATGTGGCT…	MPQFKAITTIAIIFYRSHYLSGNTTPIDALCQALEKHNLNPLAIYVSSLREPDVQAEILAILENLDQPLGAILNTTSFSLAKLQRQIGNLEMIPLWQKLNVPVLQVILSGGDRQQWQEGLRGLNPRDLAMNVALPEVDGRIITRAISFKAMAARHPQLETEVAIYEPVLDRVEWIAELTKNIINCAQTEIFQRKIALILANYPNKDGRLANGVGLDTPASCLQILEALKIAGYHLSAIPKDTETLIKQLTQGVTNDQELAQYRTVNQTIVTEKVWQFFYSLPQSVQQAMTERWQVRENWDNLPDQFAISGIQFGNIFVGIQPARGYDFDPSLNYHAPDLEPTLHYLAFYLWLRQEFSAQAIIHLGKHGNLEWLPGKSVVLSDHCHPEIALGPLPNFYPF…	cobalt-chelatase subunit CobN	cobalt-chelatase subunit CobN
NC_000911.1:2713371-2716616:-	NC_000911.1	HRIBO	CDS	2713371	2716616	-	sll0370	SGL_RS14530	pyrA	3246	1082	Yes	1.04481	5.78906	3.41693	0.213688	0.686458	0.450073	42.44	111.15	40.62	19.2	40.62	19.2	8.68	13.18	ATG	TAG	CGGACAGTTTTACCT	ATGCCACGCCGCAACGACTTAAACAAAATTATGATTTTGGGGGCTGGCCCCATTGTTATTGGTCAAGCTTGCGAATTTGATTATTCGGGCACCCAGGCGTGTAAGGCGTTGAAGGAAGAAGGTTATGAAGTGGTGTTGGTAAACTCCAACCCAGCATCGATCATGACTGACCCGGAGTTGGCGGATCGCACCTACATTGAGCCGCTCATTCCGGAAATTGTGGAAAAAATTATTGAAAAAGAACGGCCGGACGCAGTTTTACCCACCATGGGGGGGCAAACGGCATTGAACCTGGCGGTATCTCTGTCTAAGTCCGGGGTGCTGGAAAAATATGGGGTGGAATTAATTGGGGCGAAACTGCCGGCGATCGAAATGGGGGAAGACCGGGAATTATTCAAG…	MPRRNDLNKIMILGAGPIVIGQACEFDYSGTQACKALKEEGYEVVLVNSNPASIMTDPELADRTYIEPLIPEIVEKIIEKERPDAVLPTMGGQTALNLAVSLSKSGVLEKYGVELIGAKLPAIEMGEDRELFKEAMARIGVPVCPSGIASSIEEARQVAHEIGSYPLIIRPAFTLAGTGGGIAYNQEEYEEMVQYGLDQSPMSQILVEKSLLGWKEYELEVMRDLADNVVIICSIENFDPMGVHTGDSITVAPAQTLTDKEYQRLRDYSIAIIREIGVETGGSNIQFSVNPANGDVIVIEMNPRVSRSSALASKATGFPIAKFAAKLAVGYTLNEISNDITKKTPASFEPTIDYVVTKIPRFAFEKFPGAEPILNTQMKSVGEAMAIGRTFQESFQKAL…	carbamoyl-phosphate synthase, pyrimidine-specif ic, large chain	carbamoyl-phosphate synthase, pyrimidine-specific, large chain
NC_000911.1:1264328-1267564:-	NC_000911.1	HRIBO	CDS	1264328	1267564	-	sll2005	SGL_RS07790	gyrB	3237	1079	Yes	0.492207	3.1687	1.83045	0.262343	1.79451	1.02843	52.74	166.23	107.15	52.46	107.15	52.46	28.11	94.14	GTG	TAG	CAGCCTGATTTTGGA	GTGACCATGACGACCACGAACTACGGTGCCGATCAAATTCAAGTCTTGGAAGGGTTGGAACCAGTCCGTAAGCGCCCAGGGATGTATATTGGCTCCACGGGGCCCAAGGGTCTGCATCACCTAGTGTATGAAGTGGTTGACAATGCCATTGATGAGGCTTTGGCCGGCTATTGTACCCATATTGAAATTGACATTAATGCCGACGGTTCCGTCACCGTAGTGGACAATGGCCGGGGGATTCCCACCGATATTCACCCCACCACCGGGCGATCGGCCTTGGAAACAGTGTTGACGGTACTCCATGCCGGGGGCAAGTTTGGGGGCGGTGGCTATAAGGTATCCGGTGGTTTGCACGGGGTAGGGGTTTCCGTTGTTAACGCCCTGTCCGAATGGGTGGAA…	VTMTTTNYGADQIQVLEGLEPVRKRPGMYIGSTGPKGLHHLVYEVVDNAIDEALAGYCTHIEIDINADGSVTVVDNGRGIPTDIHPTTGRSALETVLTVLHAGGKFGGGGYKVSGGLHGVGVSVVNALSEWVEVKVWRQGKEHFQRFERGNPIGTLEATPNEGHSTGTQVSFLPDTQIFKDGIEFDYHTLASRLKELAYLNAGVRITFGDRRADSLKEEQFYYEGGIREYVTYMTTDKTPLHEEIIYTSGEKNDVQVEVALQWCVDAYSDTLLGFANNIRTIDGGTHLEGLKAVLTRTLNSVARKRNKLKDGDSNLGGENIREGLTGVISVKVPDPEFEGQTKTKLGNTEVRGIVDTLVGEALTEFLEFNPGVADAIIEKAVQAFKAAEAARRARELVR…	DNA gyrase B subunit [Contains: Ssp gyrB intei n]	DNA gyrase B subunit [Contains: Ssp gyrB intein]
NC_000911.1:2197732-2200959:-	NC_000911.1	HRIBO	CDS	2197732	2200959	-	sll0142	SGL_RS12200		3228	1076	Yes	0.402388	2.38228	1.39233	0.258281	0.895012	0.576647	23.93	68.3	59.47	28.67	59.47	28.67	15.36	25.66	ATG	TAA	ATCCCCCCAGCCCCT	ATGTCCTCCCCCAACTCCGTTTTTAGTCTGAGTGGCCTGGCCATCCGTCGGCACATTGCCACCCTTATGCTCACCCTGGCCATTATTGTGTTGGGGGTTTTCGCTGTTTTTTCCCTGCCGGTGGATCTGTTGCCTTCCATCACCTATCCCCGCATTGGCGTGCGACTAGATGCTCCAGGGGTATCTCCGGAAGTGGCGGTGGACGAAATTACCAGACCCTTGGAAGCGGCCCTGTCAGCCACGGAAGGGGTGGTGCAGGTTTACTCTCAAACCAGGGAGGGGCAAATTAGCCTGGATTTGTTTTTCGAGCCGGGGGGCAATATTGACCAAGCGTTGAATGACGCCACCGCTACCTTTAACCGGGCCCGCAACCAGTTGCCGGATGATCTGGAAACCCCC…	MSSPNSVFSLSGLAIRRHIATLMLTLAIIVLGVFAVFSLPVDLLPSITYPRIGVRLDAPGVSPEVAVDEITRPLEAALSATEGVVQVYSQTREGQISLDLFFEPGGNIDQALNDATATFNRARNQLPDDLETPRLFKFDPSQLPVYEFAVTSPELSGPSLRVFAEEELARELGVVPGVASVNVSGAAQEEVRINVDLQRLQRSGVSLTQVLDALQSRNVDISGGRIVGTESEPLTRTVGRFASAQEIEDLVVGTVSGLEDQSAQKVYLRDVATVIDGTEEERIFVTLNGNPAVKVSVQKQPEANTIEVVDGVKKRLEELRTEGIIPQAAELTPTLDDSVFIRNSVNNVVVSGLIGTVLAAIAVLLFLGSLRQTLIIVLAIPLATMAAIIVMKAFGLSLN…	probable cation efflux system protein	probable cation efflux system protein
NC_000911.1:3486693-3489911:-	NC_000911.1	HRIBO	CDS	3486693	3489911	-	sll0446	SGL_RS17980		3219	1073	Yes	0.558095	3.51369	2.03589	0.244863	0.726148	0.485506	29.06	79.55	52.07	22.64	52.07	22.64	12.75	16.44	ATG	TAA	ATTGCCTGACTAACC	ATGACTAACCAACCCCTACTTCCCAAAACTAATCAAGATTTTGCTGGTGGCGCTGCTCCAGGGGAATGGATCGCCGAGGGAGTGGGATTGTTTAACCGCTTGGGTAATAGTTTGGAGTTTGAAGCAGGAGCCTACCGGGAAGTAAATTCTATCCCTAGTCCTTGGTCTCGGCCGTTGCAATTAATTTCGGCTTTTCGCAACCGACAATACCCCAGTCGGGATTGGTTAATTGAGCAATATCGAGGTTTATTAACGGCTTTAGCCCTGGCGGAAAATTTAAATCTTAAGATCACTGCCACCCAGGTGCGGCTCAAGGATTATCAAGATAAGGAATTTGCCCGCTGTCTTTGGAAATTGCGCCCCAACGATAAAGATAATGTGTTGGCCATGGTTCCCCCC…	MTNQPLLPKTNQDFAGGAAPGEWIAEGVGLFNRLGNSLEFEAGAYREVNSIPSPWSRPLQLISAFRNRQYPSRDWLIEQYRGLLTALALAENLNLKITATQVRLKDYQDKEFARCLWKLRPNDKDNVLAMVPPDGPWAELYLFELDGVAIGMTSPATIVCPTGYFPEHLSRRIAWIKNGFFTNPIGNGLAPNQKEVLLPWLENLKGNLMRNPQNEDLAGRVSGMIDDYIQDLGVTTSNVFQPTTKNLPFGIPLAPPPLNALYPAEAVQNPSNVRVIASASRNPSKQLYILDPVQLPGLLGKQPQEINVIDASPLLNFDPNLHRRSDAIFATPADIFQDNLYFHKTKGLLPGTWLDQKLNLDNLTILLPFKPFLREYFSSEDLEKQVELAPVSTPEGPGV…	unknown protein	unknown protein
NC_000911.1:2765554-2768766:+	NC_000911.1	HRIBO	CDS	2765554	2768766	+	slr0897	SGL_RS14770		3213	1071	Yes	0.218319	1.53465	0.876486	0.336261	1.43663	0.886447	3.48	15.5	15.94	10.1	15.94	10.1	5.36	14.51	ATG	TAG	TTAACGCTCCTCCCT	ATGAATAGCATCCTTTCCCCCATTACCGTAGCGGTGGGCGGCTCCCTCTGGTGGAATGGCTTCACCGCTGATTTCACCATCACCAACACTTCTACCACTAGCCTCAGCAATTGGACTTACACCTTCGACACTGTCCACAAAATTTCCGGTAATCCCTGGGGCGCAACTTTTACCAGCGTGGATTTGGGCAATGGCATCACCCGCTACACATTAACTGGGGCTGGTTGGGCATCGAGTATTCCCCCCGGTGGTTCCGTCACCATTGGTTTTAATGGTACCCAGGGAACGGCGATCGGTAATAGCGGCTCTTTGACTTCTGCTTTATTATTCACCGACGTTAATGCCAATACTGGGGGGACTGGGGGAGAACATCAGCATCCAGATCCTATTCCTCCCACG…	MNSILSPITVAVGGSLWWNGFTADFTITNTSTTSLSNWTYTFDTVHKISGNPWGATFTSVDLGNGITRYTLTGAGWASSIPPGGSVTIGFNGTQGTAIGNSGSLTSALLFTDVNANTGGTGGEHQHPDPIPPTDPVVDPTPNPGTGRVFAANPAAADIVGFNPAVDRLDFGDVSVHNLILGKTSTGKVAIINPWAWTPEFQIIRGVSFDDLTAANFGIVQNEHLRQDIGGVLSWELGLGARNSNTVYVRSHEYGVQERIENFNPATMKLSFLYYGTRERLTVSDTPEGLLIATQPTGQTLLLVGVTRSQLIPANLEFHHDQVVEDRLEDAFGVTVEQVTVVSRTGLATPQGPAGQITDGHQSRPGNGLTPIGGGEFSGGAGGHGSGHDHGDHDHGGGMD…	probable endoglucanase	probable endoglucanase
NC_000911.1:1375351-1378545:+	NC_000911.1	HRIBO	CDS	1375351	1378545	+	slr1243	SGL_RS08320		3195	1065	Yes	0.748518	2.60136	1.67494	0.328535	0.786395	0.557465	8.84	19.12	11.81	7.35	11.81	7.35	3.88	5.78	ATG	TGA	AAACACATAAGGCTT	ATGGATTTTACTAAAATAAAGAGAATTGAAGAGAATTTAAACAGGCTTGAGGACTGTTCTGTTGATGAGTTAAAAGTTTTAACTGATGAACTGTTAGCTTCCATTTGTGAAACCTTAAATATTTCTCAGAGTTCTAACCTTATTTCAGCTTTATTTAATGAGCGAACAAGTACCAACCAAAAAAAACTAATAGCCGTATCTATGCTAAGAGCCTTATGCAGGAATCAAAGCGTAGTTTGGAATCACAATAGTGTCACACTACGCAATAAAACATTTGATTTATTCGATGAGATTTTAGTGGATATTTATAAGCAGTTTCAGATAGATATTAAATCAGATAAAGAAGAAAAAACATCAAAACTTCAAGAAATTGAAGGAAATTTAAATCGCAAGTTCTTT…	MDFTKIKRIEENLNRLEDCSVDELKVLTDELLASICETLNISQSSNLISALFNERTSTNQKKLIAVSMLRALCRNQSVVWNHNSVTLRNKTFDLFDEILVDIYKQFQIDIKSDKEEKTSKLQEIEGNLNRKFFNLEQSICDLKDLDKFKSDFMQFLFADKVNSFIFRQFSDEDILSKPKIQSLFKILQDYQKSNSVESKINYYDNIKNSYQEFIDQCSKQSELVETCIGNFFKRLLNLVDEDYTKRDDIVPTIIRVELIKKKYPLHIKDQLLNIEIQVNNIGKGKAFDIEVTLDVDDSLLMLYDPKIYIGNLEPLESTHRIFEAKILVQKNKEKLEEIILGRVDWYNCDKTRCHEEFSGELLPQNTELNWEKLSKEKPYSLEAISKENDLIGRSEQIRQ…	unknown protein	unknown protein
NC_005232.1:94710-97901:+	NC_005232.1	HRIBO	CDS	94710	97901	+	slr6102			3192	1064	Yes	6.35974	4.3331	5.34642	7.97296	9.08041	8.52668	6560.83	5429.59	1031.62	1253.05	1031.62	1253.05	8225.06	11378.2	GTG	TGA	GCCTAAATTAAATCA	GTGTCTAGGATTATGAAATCAAGCCCTGAATATCTTTATTCTGAAAAACCTACCCTAGATGAATTAAAAAAACTTGGCTGGCAATATGTTCCTGGCTGTTTGGAAGATCAACCTGTTCCTACTGATCCACTGATTACTGAACGGGAAAGTTTTAAGCAGATTCTTATTAAGCCCCGACTTCAGCAAGCCCTTAAGCGCATTAATCTGACTGATGATGGAGAGCCATGGCTAGATGACTACCAAATTGAGTCGGCCATTTCCCAGCTAGAGCGGGCTGTCACCACCGAAAAGCTGATCGAAGCCAATCAACTCATCACAGAACTGCTCTGGAATGGTGTGACTGTATTCGTTCCCAATGGTAAAGATGAAATTGTTCAGTTCATTGATTTCGAGAATATT…	VSRIMKSSPEYLYSEKPTLDELKKLGWQYVPGCLEDQPVPTDPLITERESFKQILIKPRLQQALKRINLTDDGEPWLDDYQIESAISQLERAVTTEKLIEANQLITELLWNGVTVFVPNGKDEIVQFIDFENIEQNDFLAINQYRVDPPSSNGKHFSIPDIVLFVNGIPLVVMECKSPTLQNPLTDAIEDLLKYSNQRNSEQPEGIEKLFHYNLMMVAMSQNRAVVGAVCAKHDEYLAWKDVYPATPESIAQIFAVEKLIGDRQTLVAGLLKPDIVLDVLRNFTMFSTHTGKLEKVLPRYLQYRAILKAIDRLQNNSTRQDHSDDRRGGIVWHTQGSGKSLSMVYLIRKIRRTPNLKRFKIVIVTDRTDLEKQLSATVKLTKEPLQIAKNVKQLEHYLA…	type I restriction-modification system R subunit	Derived by automated computational analysis using gene prediction method: Protein Homology.
NC_000911.1:1644905-1648090:+	NC_000911.1	HRIBO	CDS	1644905	1648090	+	slr2131	SGL_RS09605		3186	1062	Yes	0.188166	2.06309	1.12563	0.102241	0.633724	0.367982	8.65	36.95	45.97	17.91	45.97	17.91	4.7	11.35	ATG	TAG	GCCTTTTTCCCCGCC	ATGTTCGTTGATTTTTTCATTAAGCGCCCTGTTTTCTCCAGCGTTTGCGCCATCATCATTTTGCTGGTGGGGACGATTAGCATTTTTAGCTTACCGATCGCCCAATTTCCGGAAGTAGCCCCAACCACCATTCAGGTTAGTTCCAACTACAGCGGGGCCAATGCGGAAGTGGTGGAAAGGGCCGTCACCGACATTTTGGAGCGGCAGATCAACGGGGTGCAGGGGATGAGGTACATTTCCTCTACCAGCAGTAACGATGGCACCAGTAGCATCACCGTCACCTTTGACCGGAGCCAGAATAAGGACATTGCCGCCGTCGATGTGCAAAACCGCGTGGCTCTGGCAGAACCGCAACTGCCGGAAGCAGTGAGAAGAACGGGGATCAGGGTTAATAAAGAA…	MFVDFFIKRPVFSSVCAIIILLVGTISIFSLPIAQFPEVAPTTIQVSSNYSGANAEVVERAVTDILERQINGVQGMRYISSTSSNDGTSSITVTFDRSQNKDIAAVDVQNRVALAEPQLPEAVRRTGIRVNKESNALLLGIGITSPDGEYDNVFLSNYADRYLVDPIRRLEGVGDVRIFGERLYAMRLWVDPMKLAAQQLTMADLSRALQEQNLQVGAGQIGAEPAPPGQEYQLDLLASSQLVEVKDFEDLIVKSGASGSVVRFKDIGRVELGAQNYNSFLRFRGDEAVGLGIYQLLDSNALEVARLVKDEMARLAQNFPEGIEYSVAFDTTEFVQESLSEVVETLLIAVVLVILVILVFLQDWRSALIPALTIPLALIGTFAFVKVFNFSINSLTLFG…	RND multidrug efflux transporter	RND multidrug efflux transporter
NC_000911.1:3051772-3054936:+	NC_000911.1	HRIBO	CDS	3051772	3054936	+	slr0794	SGL_RS16065	nrsA	3165	1055	Yes	0.150668	1.03046	0.590563	0.149453	1.23604	0.692747	1.24	4.06	8.23	3.94	8.23	3.94	1.23	4.87	ATG	TAA	TGCCTTTATTGACCT	ATGTTAAATACGCTTCTCAATCAAATTCTCAAAACCTCGATCGCCCAACGGTGGTTCATTGTTATTGCGGCCATTGGCATCACCCTTTGGGGGATTATCAGCGTGGGCCAAATGCCCCTGGATGTGTTTCCTGAATTTGCGCCGCCCCAGGTGGATATTCACACCGAAGCTCCTGGTCTGGCACCGGAAGAAGTGGAAACCCAAATTACCGTTCCCATTGAAAGTGCGGTGAATGGTTTACCGGGGGTGACAACGGTGCGCTCTTCTTCTAAGGTGGGCCTCTCCATGGTCAGCGTGGTCTTTGACCAGGATGCAGATGTCTATAAAGCCCGTCAAACAGTGACGGAACGCTTGCAACAGGTAACTAATCAACTACCGGAAGGTAGTCATCCCCCGGAA…	MLNTLLNQILKTSIAQRWFIVIAAIGITLWGIISVGQMPLDVFPEFAPPQVDIHTEAPGLAPEEVETQITVPIESAVNGLPGVTTVRSSSKVGLSMVSVVFDQDADVYKARQTVTERLQQVTNQLPEGSHPPEISPLVSPLGTIVQYAFTIKDGGSSNLMDLRRLLETTVGNQLLSVPGVSQVTLYGGDERQEQVLVDPAKLRALKVSLNEVTQASAEANSNAPGGFLIGGGQELLVRGLGQMQSIEDLRRSVVKVVDGKPILLEDVAEVKTGSALKRGDGSFNGQPAIVMMVNKQPDVDTPTVTKAVEAVVESLKPTFPADVQIAQTFRQANFIDSAIRNVSTSLLEGIVIVSVIMLIFLMNWRTAAITLTAIPLSLLIGLMFMKAWGLGINTMTLGG…	cation efflux system protein involved in nickel and cobalt tolerance	cation efflux system protein involved in nickel an d cobalt tolerance
NC_005232.1:39171-42311:+	NC_005232.1	HRIBO	CDS	39171	42311	+	slr6043	SGL_RS01565		3141	1047	Yes	3.08844	3.09229	3.09036	1.57485	1.54723	1.56104	1523.68	949.61	493.35	307.09	493.35	307.09	776.95	475.14	ATG	TAA	CTATTTACCTAGAAA	ATGCTTAATGCCATCCTCAAATGGTCGATCGCCCAACGTTGGCTAGTGGTTATTGGGGCCGTGTTGGTGGCTATTTTAGGGAGCTACAACCTCACCCGGATGCCCCTAGATGTGTTTCCCCCCTTTGCCCCTCCCCAGGTGGAAATCCAAACGGAAGCCCCAGGCTTAGCACCGGAGGAAGTGGAAACTCTAATTACTCTGCCCATTGAAAGTGCGGTGAATGGCACCCCAGGGGTAGAAATGGTGCGGTCTTCCTCAGCGGTGGGCATTTCCGTGGTTAAGGCTATTTTTGCCGATAACACAGACATTTACCGAGCCAGACAATTGGTGACGGAACGGCTACAATCTGCCCGGAGTAAATTACCCAGCGGGGCAGAGGAACCACAAATTTCTCCTGTA…	MLNAILKWSIAQRWLVVIGAVLVAILGSYNLTRMPLDVFPPFAPPQVEIQTEAPGLAPEEVETLITLPIESAVNGTPGVEMVRSSSAVGISVVKAIFADNTDIYRARQLVTERLQSARSKLPSGAEEPQISPVSSPISTILMYALTVEESPTNPQSNLMEVRRRVDREITNQILAVPGVSQVVAYGGDVKQYQVLVDPARLKGFNISLQQVTKAVEEANVNAAGGFLLTADQEDVIRGLGRIENLSQLADSVVTARDGTPILLRDVAEVTIGPALMRGDGSVDGQRAVVLVIDKQPQADTPTVTKAVERTMAEVKAALPAGVNLQVTFRQESFIDAAIANVRDSLRDGIIIVAVVMVVFLMNWRTAIITLSAIPLSILIGMMILGWFGQGINAMTLGGL…	cation transporter	slr6043_Derived by automated computational analysis using gene prediction method: Protein Homology.
NC_000911.1:2274868-2277996:+	NC_000911.1	HRIBO	CDS	2274868	2277996	+	slr0323	SGL_RS12555	ams1	3129	1043	Yes	0.279192	1.68021	0.979699	0.0390974	0.324307	0.181702	10.64	26.06	38.11	15.51	38.11	15.51	1.49	5.03	ATG	TAA	AAGTGCAGACGAGTA	ATGACAGAATCGTTGAGTCCCTTACTGCCGGAAATTAGTATCGCCCTGGTGCTGGAACAACTAAGGCGTTTATGTCGGCAAAATTGTCAAAGCCATTGGTATTGCTTACCTGGTGCGCCTTGGGAGATTTCTGATTGGCAAACTTATCCATTGGGTAAAGTTAACGAGAAGGGTTATTTAATTTGGGAAAAAGGCGAAAAAACCCAATGGTTTGCCCAAACTTTTACCGTGCCTAAAGCTTTGGCGGACTATCCTTTAGATGGTTTGACATTGCGGTTAGCTTTAACTTGGTGGGCCAAGGATGCTCAAATTTTTGTTAATGGCGAGTTAGTTCAAGCTGGGGATTTATTTGATTCTAAAGCTAGAGTTTTGTTAACTGATAACTCCCAAATTGGTCGA…	MTESLSPLLPEISIALVLEQLRRLCRQNCQSHWYCLPGAPWEISDWQTYPLGKVNEKGYLIWEKGEKTQWFAQTFTVPKALADYPLDGLTLRLALTWWAKDAQIFVNGELVQAGDLFDSKARVLLTDNSQIGRTFTVALKLTSSGHDIGGLMQSQLIFERKYPDLDPGFIADEIEVLSLYLAQFESERLAQLSKTLEAITWNKISDQEQFDQSLLQLRQRLLLLTEGLKQQQINLLGHAHLDMAWLWQLEETWEVGERTFQSVINLQTEFADLVFGHTSPVLYQWIEEHLPALFEQIQVAIKKGNWELLGGMWVEPEVNIISGESLARQFLYGQRYFEAKFGQISKVAWLPDSFGFCGQLPQIFHQSGIDYFVTGKLHWNDTNSFPHGAFHWRSPDGTE…	putative alpha-mannosidase	putative alpha-mannosidase
NC_000911.1:3305654-3308773:-	NC_000911.1	HRIBO	CDS	3305654	3308773	-	sll1366	SGL_RS17180		3120	1040	Yes	0.256527	1.09599	0.676258	0.288466	0.547994	0.41823	10.12	21.58	39.45	19.69	39.45	19.69	11.38	10.79	ATG	TGA	CAGAAACTAGATCCT	ATGGCGACTATCCACGGTAATTGGCAACCCTCCCACGGGGAAAACGGCGGCAAACTGTTTCTTTGGGCGGATACCTGGGGTCATCCTTTGCCAGAAACCATTGGCGATCGCCATCCCTTTGCGTTGGATCTGCCGGATTTGCTACAGGCCTGGTCGAATTTGCCCCTGGCCTTCCCCAAGGCGGATGGGGTGACAGAGGCAGCCCTTACTCTGCATTTACCCAGCCATCGCCAGCAAAAAATTCCCCTACCCTTTGTCACAGGGCAAGATCCGGTGGCCATGGATGCGAAATATCTCCACTGGCGATCGTGGCAGGTAACCGGGGTAAATCTGACCCCAAGCCAAACGTTAACGTTGCTCCAATCTATTCCCCTGGGGGGCCAAGCCTTAGCTAACTTA…	MATIHGNWQPSHGENGGKLFLWADTWGHPLPETIGDRHPFALDLPDLLQAWSNLPLAFPKADGVTEAALTLHLPSHRQQKIPLPFVTGQDPVAMDAKYLHWRSWQVTGVNLTPSQTLTLLQSIPLGGQALANLGSEFYFYGQLHRWCLDLVLRGKFVPGLEQRGEDGNYYAQWIPILDSIQDQTHLAQFSQRVPACALANLTDSQEPQMLVVDLLQKLLQAQIGAVSPSLANVKEVWLNDWLRGLTHGGQTSLGTGKALQRLATSLDHWYLPVQNYLGQKNNQALAQRQWRGALRLQPPADDGGGTWQLDYGLQALDDGEFWLPAASLWAMAGDRLVWQGRRVDQGAESLLRGLGVAAQIYEPIAASLTERCPTGCGLDAIQAYEFILAIAHQLRDRGL…	putative SNF2 helicase	putative SNF2 helicase
NC_000911.1:3254560-3257670:+	NC_000911.1	HRIBO	CDS	3254560	3257670	+	slr0554			3111	1037		0.20716	2.75411	1.48064	0.159427	2.60891	1.38417	4.34	28.45	20.95	10.33	20.95	10.33	3.34	26.95	GTG	TAA	ACGCTACCATATTTA	GTGTTTTGCCCCTACAATGAGACTCCCCGCACACTAGATATGGAGTCTTGTTCCGGCAAGACCGATGGCAAAATGAATCACTTGCAAGAATGGCGGCAAAGTTGTGTAGACGACCAACTAACCCGCCTCAATGTCACTCCCCTTTTAGGGGATGCCCCCGCCCAACATTTGCTTTATGCTGAAGCGCTCCAGCGCCGTAATGACGGCCGAGTTAGTGACGGTTTAATGAAACGTTATGCCCACGTGGCCTCGGGGGGCTGGTGGTGTTCTGGCATTGATTTACTGTCCGGGGAAAAAGATCTATGGGGGTGTTTTAAGCCCGATCGCCCGAGACAGGATGGGGAAAGCAGTAAGACCATTAAATATGAGCATCCTCCCAAAACACCCACGGGAATTTTT…	VFCPYNETPRTLDMESCSGKTDGKMNHLQEWRQSCVDDQLTRLNVTPLLGDAPAQHLLYAEALQRRNDGRVSDGLMKRYAHVASGGWWCSGIDLLSGEKDLWGCFKPDRPRQDGESSKTIKYEHPPKTPTGIFALRVPLHLWERIAAKAGVVLTEEDQDPDQPDLGFWQWLMGHPEIPLVITEGAKKAGALLTAGYGAIALPGVHNGYRTPRDDQGQRIGKCQLIPALGKLAAPGRQILIAFDQDSKPKTIQQVNLAIQRLGYLFSRQGCEVKVLQWEHHLGKGVDDVIAHQGSDYLQQLVGKALPLEIWKAQRLNRLTHSRGMEVEARYLPPLTIPAEEKLIALQSPKGTGKTEFLARIVRQAQAEHRPVLVIGHRIRLVQELCHRFQLPYVGDLSSS…	hypothetical protein	hypothetical protein
NC_000911.1:1994147-1997251:-	NC_000911.1	HRIBO	CDS	1994147	1997251	-	sll0920	SGL_RS11290	ppc	3105	1035	Yes	0.854096	3.53084	2.19247	0.566968	0.778719	0.672843	78.5	179.19	91.91	50.75	91.91	50.75	52.11	39.52	ATG	TGA	GTCCTAGAGGTTCCC	ATGAACTTGGCAGTTCCTGCATTCGGTCTTTCCACTAACTGGTCTGGTAATGGCAATGGTTCCAACTCTGAAGAAGAGTCGGTGCTTTACCAGCGGTTAAAGATGGTGGAGGAATTGTGGGAAAGGGTGCTCCAAAGCGAATGTGGCCAGGAATTGGTGGATTTGCTGACGGAATTAAGGCTTCAGGGTACCCATGAGGCGATCACCAGCGAAATTTCCGAAGAAGTCATCATGGGTATTACCCAGCGCATTGAGCATTTAGAACTCAATGATGCCATCCGGGCGGCTCGGGCCTTTGCCCTATATTTCCAGTTGATCAACATCGTTGAACAGCACTACGAACAAAACGAGCAACAACGGAATCGTTGGGAAGCTTCCCAGGAAACCAACTTCTATGAG…	MNLAVPAFGLSTNWSGNGNGSNSEEESVLYQRLKMVEELWERVLQSECGQELVDLLTELRLQGTHEAITSEISEEVIMGITQRIEHLELNDAIRAARAFALYFQLINIVEQHYEQNEQQRNRWEASQETNFYEQAGNEEEMVPPSRLGASTEPLPVGIDQNELQASVGTFHWLMRELKRLNVPPQHIQNLLDHLDIRLVITAHPTEIVRHTIRRKQRRVDRILRKLDQLQGSVTGRDWLNTWDAKTAIAQLTEEIRFWWRTDELHQFKPTVLDEVDYSLHYFDEVLFDAVPELSKRLGQAIKETFPHLRAPRANFCYFGSWVGGDRDGNPSVTPEVTWQTACYQRGLVLGKYLFSLGELVAILSPSLHWCKVSQELLDSLERDRIQLPEIYEELSLRYR…	phosphoenolpyruvate carboxylase	phosphoenolpyruvate carboxylase
NC_000911.1:2366089-2369181:+	NC_000911.1	HRIBO	CDS	2366089	2369181	+	slr0369			3093	1031	Yes	0.242641	3.2913	1.76697	0.103546	0.970898	0.537222	28.19	118.75	116.18	36.08	116.18	36.08	12.03	35.03	GTG	TAG	GTAACCACCAACTAT	GTGGGCTCCGATGCCCAAACTGCAGTGGATAATGTCACCACTGTGCTAGAGCGGCAGATTAACGGTACGGAGCAAGTCATTTATATGAACTCCACCACCGACAACACTGGCACTAGCACCATCAACGTCTATTTCCCGGTGGAAATGGACCGCAACATTGCCCAGGTACTCGTCCAAAATAACGTGGCGATCGCCGCTTCCAGTTTGCCGGAAGTTGTCAACCGCCAGGGGGTAACGACCCAGACCCAATCCCCCTCTGTCACCATTGCCTATGGGGTTTACTCAGAAAACGATGACCAGGGCAAACCGATCTATGACGACATCTTTGTCAGTAACTTTGTTGACCGGGTGTTGCTGGATGAAATTAAACGGATTGACGGGGTGGGTTCGGCCATTTTA…	VGSDAQTAVDNVTTVLERQINGTEQVIYMNSTTDNTGTSTINVYFPVEMDRNIAQVLVQNNVAIAASSLPEVVNRQGVTTQTQSPSVTIAYGVYSENDDQGKPIYDDIFVSNFVDRVLLDEIKRIDGVGSAILIGASEYAMRFWLDPDALAARDLTAADVTNAIRSQNIQVGVGGVNLPPVTDQQRFQINARALSRFTTPEEAEQIVVKVGDDGTLIRIKDVGRATIGTQNYIQTALFNNAPAVAFVIYQLPGTNALDTANMVKEKMAELRPLFPPGLNAEVALDNTLFVTASLEEAALTLIEAILLVILVIFIFLQNWRTTLIPALAIPVSLIGAMAFALAFGFSLNQLTLFGVILATGLVVDDGILVVEAIEVKLDQGMKPFQAALDAMGELTGAVI…	RND multidrug efflux transporter	RND multidrug efflux transporter
NC_000911.1:2781403-2784447:+	NC_000911.1	HRIBO	CDS	2781403	2784447	+	slr0907	SGL_RS14830		3045	1015	Yes	0.641709	4.82155	2.73163	0.296932	2.15236	1.22464	17.57	57.28	27.38	11.88	27.38	11.88	8.13	25.57	ATG	TAG	CCCTTGATTATCACC	ATGGTCGAATTAACTGAAAATCACTACAACCTACAACAGGAACTGGCCGATGCCCTCCAATCCCTGGGCCGTAGTATTCATTCTTTGGAAAGGGACATAGTTATTAGCCATTGTGAAATTAATGCCGACCATGGGGTGGGGGTTTTACTGCAAAGGCTTTTTCCCAACTCAGATGAGCTATTGACAATTCGCTCCCATGATCTTTACGGCGGGCAACAGGAGTTTGGCGATCGCCATTTTTTAGTGCAGGGAGGAAGTTTTGTCACCATTGCCCAACAGGTGCAGTGGCTGTTGCACTATTATGCTCCCCGAAGATTTTTATCGGTACCTTATTTCCCAGAGGATTACCAAATTTCCATTGCCCTAAAGCGACTGTATAACTGTCCATTGTGTGTTTTC…	MVELTENHYNLQQELADALQSLGRSIHSLERDIVISHCEINADHGVGVLLQRLFPNSDELLTIRSHDLYGGQQEFGDRHFLVQGGSFVTIAQQVQWLLHYYAPRRFLSVPYFPEDYQISIALKRLYNCPLCVFIMDDQNIYSPQVPDSLVDELLYRADICLGISRPLCDAYEAKFKRKFWFVPPVVQGHLIKTEPPQSWDRSPSKRQGVMIGNVWSQQWLDQLRSLCRATGVKIDWYGNPNRDWLNFNEAELGEDGINFKGFVPEDELIDILRTADFAVIPTGISDQSGDRPELTKLSLPSRSCFITATANLPILVVGSPESAVAQFVQSQGIGTVCAYQPEDFSAKIDYLLENQGPMRKQAFKLGQNLSADGIAQWIWDSLAQGQAMDARFEAQSAKI…	unknown protein	unknown protein
NC_000911.1:1441002-1444046:-	NC_000911.1	HRIBO	CDS	1441002	1444046	-	sll1905	SGL_RS08635	hik19	3045	1015	Yes	0.367259	2.24502	1.30614	0.190076	1.40895	0.799513	18.8	50.67	51.19	22.57	51.19	22.57	9.73	31.8	ATG	TAG	ACGGGCCAATTTGTA	ATGTCCCCATCCCAGCCCCACCCACCCATTGCTACTTTTGAGCCGGAGAGTTTTCTCATTCTGGTGGTGGATGACGTAAAAGAGAATATTTATGTGATTTCGGAACTGTTGGAAGGGGAAGGTTACAGCACTACTTTTGTGACCTCCGGGCCGGAAGCTTTGCAACGGGTGACCCAGGCCCAACCGGATCTCATTCTGCTGGATTTGATGATGCCCGGCATGGATGGGCTGGAGGTGTGCGATCGCCTTAAACAAGATCCCCAAACCAGGGATATTCCGGTAATTTTTCTCACTGCTAGCAACGAAAAACAAGATTTGCTGCAAGCCTTTGCCAAGGGGGCAGTGGACTATGTCACCAAACCCTTTAGCCCGCCGGAACTGTTGGCTAGGGTAAAAACC…	MSPSQPHPPIATFEPESFLILVVDDVKENIYVISELLEGEGYSTTFVTSGPEALQRVTQAQPDLILLDLMMPGMDGLEVCDRLKQDPQTRDIPVIFLTASNEKQDLLQAFAKGAVDYVTKPFSPPELLARVKTHLELKQTRDNLHHTLLEQARTAEALACTSTRLGILVQNMQAGVLMTDAQGTIVVVNPEFARLFNLGFPADLLLGKNLTAIAPRINGLISHGQGVTHNFLAIESPEPLLKVELALEDGRFFERDYVPIMLGDSSQGHFWLYRDISQRKQVEMIQGQSLEMERRMRQQLAEQNQELVAATTAAEAANRSKSEFLATMSHEIRTPMNAIIGMTGLLLDTDLTTQQKYFAQTIRNSGETLLTLINDILDFSKIEAGKLDLEVYPFDLGQC…	two-component hybrid sensor and regulator	two-component hybrid sensor and regulator
NC_000911.1:1850707-1853742:-	NC_000911.1	HRIBO	CDS	1850707	1853742	-	sll1180	SGL_RS10630	hlyB	3036	1012	Yes	0.373512	4.28701	2.33026	0.12065	1.91749	1.01907	32.63	156.39	87.36	36.48	87.36	36.48	10.54	69.95	ATG	TAG	AAATTATCTGTTGCT	ATGAGTCTGACCATTGCCGATTATCAATCCTTCTTGCGGGAAATTGAACCCTTTGCTCAACTTCCTGCCCCGGCGATCGCCGAGATAGCGGCAAAACTGAGGCCGCTAAGGTTTCGCATGGGACAGATAATTCTTGCCCGGGGAAAGTTGGCCAATAATGTTTATTTCTTAGTCAGTGGGCAAGCAAGACTACTCGGTTACGACCCCGGCACTGGTTACCCCGCCACCATGGCTTTGCTCCAGAATGGGGCAGTGATTGGGGATAACAACGCCATCAGAAATGTCCCCTGTGAAACGGCGATCGCCTCTACGGAAACTATTTGCGCCAGCCTCACTAGGGACGAGTTTTTAGCTTTGGTAGATAAGTATCCTGAACTAGCCAGGGTTTATCGCCACCAA…	MSLTIADYQSFLREIEPFAQLPAPAIAEIAAKLRPLRFRMGQIILARGKLANNVYFLVSGQARLLGYDPGTGYPATMALLQNGAVIGDNNAIRNVPCETAIASTETICASLTRDEFLALVDKYPELARVYRHQCGRVELFDLLGEQLQRTAQGNVDLRQLTLEMLPQSQVYELQPGSHSLPSDLPDPERLWLVSSGELEQCPRGSALPDPDSALVLKAQTLVRLIGLPPLPRFFPGSSGSKTNGNGNGHGEVPLATVTRLAPEDSPWDDIPYADPNQLGEPLPEPTVVKSGRKSYPVVRGQNPTDAGVACFQMISQYFGMPFRRDIIQRIVTEEIKRSEALSLPICGAIVELMGLTSQLVRIPKGVFGQMQVPFLIRWQDSLALVYEAGDREVKIAVPE…	toxin secretion ABC transporter ATP-binding pro tein	toxin secretion ABC transporter ATP-binding protei n
NC_000911.1:70944-73973:-	NC_000911.1	HRIBO	CDS	70944	73973	-	sll1060			3030	1010	Yes	0.55699	0.589507	0.573249	0.617911	0.565722	0.591817	79.36	51.8	142.48	87.87	142.48	87.87	88.04	49.71	ATG	TAG	AAGGGGGTTAGGGCC	ATGAAAGGGTGGGTCAAGGGGGCGATTGTTCTGGCCATTGCTTTGGTGGGTTTGGAAGTCATTGCCCGCATCTATGTGGAAAATCTCTGGTTCCAGGAGTTAAGCTTCCAGTCCGTCTTTTGGAAGCGGGTGCGCTGGCAAGGGAGCATTGCTCTGATTACAGGCTTTATTTCCTGGGGCTTTATTGTCTTCCAGGTTAAAGTCACTAATCGCCTGATCCAAGAGGAGGCCCAACTGAAAGGCCTGGCCGTTGCCCAAGCTGTTTATGCACCAGTGCCCGTGGCGATCGGTTCTCGTTACTTGCCCATGCCCGCTCCCCCGGTGGGCCCCAAAGCCCATTCCCGTCCCCTGCAACTACCCGTTCTACTGCCCCTAATTATTGTCCTACAACTGATTCTG…	MKGWVKGAIVLAIALVGLEVIARIYVENLWFQELSFQSVFWKRVRWQGSIALITGFISWGFIVFQVKVTNRLIQEEAQLKGLAVAQAVYAPVPVAIGSRYLPMPAPPVGPKAHSRPLQLPVLLPLIIVLQLILISLVMYYVFITIQVWTPDYTLPNITPAVPQPFRLHFLFTSFSGMGSQLGVTALAGMLALIGVLRGPRLLPGLVFILSAVWGLLLSGNWFRLLLSVNSQPFNTIDPQFHHDISFYIFQIPLWQLLESWWRGLFLFSLLGVTLIILKSADSLSEGRFPGFSAAQLRHISALGAAVALTLGVEHWLKRYDYLFANHGVVYGANYTDIHWRLPVETGLAIFSMAIAIWLGWLSVKGWPRAKGTGAPQRRGQLPIIGLWLPVAVYLLILLL…	hypothetical protein	hypothetical protein
NC_000911.1:498076-501096:+	NC_000911.1	HRIBO	CDS	498076	501096	+	slr1048	SGL_RS04230	sbcC	3021	1007	Yes	0.455115	2.60485	1.52998	0.262213	1.49123	0.876721	10.9	31.18	23.95	11.97	23.95	11.97	6.28	17.85	ATG	TAG	GGGGGATGATTGACT	ATGGTGCCCCAACAATTAATTTTAAAAAATTTCCTCAGTTATCAGGATGTGAGCCTGAACTTTCGGGGCCTGCATACGGCCTGTATCTGTGGGTCTAACGGTGCGGGTAAATCGTCTTTGTTGGAAGCAATCACTTGGGCAATTTGGGGCAAATGTCGGGCTGAAAGTGAGGATGATGTGCTCCATAACGGCACCGACCAAGTGAGAGTGGATTTTGAATTTATTAGTAATAACCAAACCTATCGAATTATTCGTAGTCGCCAACGGGGGCGCAGTAGTGTAACGGAATTTCAGATCAAAAGCGGTGATCATTTCCGCACCCTTTCCGCCAAAGGACTCAGGGCCACCCAAGAAAAAATCACCAACACCTTAAAGTTAGATTACGAAACTTTTGTCAAT…	MVPQQLILKNFLSYQDVSLNFRGLHTACICGSNGAGKSSLLEAITWAIWGKCRAESEDDVLHNGTDQVRVDFEFISNNQTYRIIRSRQRGRSSVTEFQIKSGDHFRTLSAKGLRATQEKITNTLKLDYETFVNSAYLRQGRADEFMLRKPSERKQILADLLKLDQYEMLATRAKDISKEAKGKINILDERLQILEQDLNQRPDVVANQAKLVAEITEVQAQQQQTQWQLQQLQTSQNQRQQWQKQAGWQQRQCQELTTEIARLENQNEEINQQCQKLKLLLEQEAVIQVNFQRYQTLQSQETELAKAFQQYQNLQQQRQDLEQQLQRQENELARQTEQQLLRLEHLDKQLAELQPILAQQQDIEADLDKLKIAKQKLSQLDNLQHQVAPLLQRRSALQG…	hypothetical protein	hypothetical protein
NC_000911.1:3493885-3496905:+	NC_000911.1	HRIBO	CDS	3493885	3496905	+	slr0451	SGL_RS18000	ski2	3021	1007	Yes	0.987776	0.801032	0.894404	1.46061	0.747734	1.10417	116.36	51.25	117.8	63.98	117.8	63.98	172.06	47.84	GTG	TAA	CTTTTGCCTAAATCT	GTGAAAACCCTAGCCTACGCTAACCCTGCTGATCTATTCGCCTTTCCCTTGGATGACTTCCAACAAGAGGCGATCGCCGCCCTGGACCAAGACCAGTCAGTGGTAGTGTGTGCCCCCACAGGTTCCGGTAAAACGGTAGTCGGAGAATATGCCATCTATCGAGCCATTGCCAGGGGAAAAAGGGTTTTTTATACTACGCCTTTGAAGGCCTTGTCCAATCAAAAAATTCGGGATTTCCAGGAAAAATTAGAGAAGTTAGGCCTAGAAAATGCGGCCCAACTAGTGGGCTTAATTACCGGTGATACGGTGATCAATGCCGATGCCCCGGTGGTGGTAATGACCACGGAAATTTTTAGGAATATGCTCTACGAAACCCCCATTGGGGAAGTAGGCACTTCT…	VKTLAYANPADLFAFPLDDFQQEAIAALDQDQSVVVCAPTGSGKTVVGEYAIYRAIARGKRVFYTTPLKALSNQKIRDFQEKLEKLGLENAAQLVGLITGDTVINADAPVVVMTTEIFRNMLYETPIGEVGTSLEDVETVVFDEVHYISDRGRGTVWEESIIYCPSTIQLVGLSATIGNPEQLTEWINQVRTGVSLKVLRQGEQRNDSPPCVLVNSDFRPVPLTFHYSTRKGLFPLLNEKKTGVNTRLLPKAGNKNTRSGKNRRMRREDCPYPLLVMQQLQERNLLPVIYVIFSRRGCEQAAQSLEDLSLVEPAEQESIQLQLLDFFFGKNPLLRQKLERDLANGLPDLVQAVVAYLDHPQDSEAAQRLLTALAIDPEGMFKLWGWIAQSSPMTRFEQI…	putative helicase	putative helicase
NC_000911.1:134437-137442:+	NC_000911.1	HRIBO	CDS	134437	137442	+	slr0744	SGL_RS02480	infB	3006	1002	Yes	0.414247	5.10096	2.7576	0.141922	1.25488	0.698402	60.77	308.2	146.7	60.42	146.7	60.42	20.82	75.82	ATG	TAG	TCAGGGGGACAGTGG	ATGAACAACGCCAAAGTCAGAATTTATGACCTATCAAAAGAATTAAATCTGGAGAATCGAGATATTTTAGACATCTGCGAACGGCTCAACGTGGCTGCTAAAAGTCATAGCAGTACCATCAGTGAATCCGATGCGGAGCGCATCAAAGCGGCAGCTGAAAAATTCACCCCCCAACAACCGAAAAAGCCTAGAGTGGCATCCCGTCCGGAGTCGAAAGAGGATAAGTCAGATCCCAAGCAGCAAAAGATTCTAGCAATTCACCACAAACAGGAAAAATCTGGCGGTCCATCTCCGGCCCGGCCCACCCCCCCTCCCCGGCCAAAACTACAAGCGCCGAAGGCCCCCACGCCCCCCCAACCCCCCGTGGCCAAAGCTTCAGCTCCAAAGATTCAGAAACAG…	MNNAKVRIYDLSKELNLENRDILDICERLNVAAKSHSSTISESDAERIKAAAEKFTPQQPKKPRVASRPESKEDKSDPKQQKILAIHHKQEKSGGPSPARPTPPPRPKLQAPKAPTPPQPPVAKASAPKIQKQEEPAQEAPKSVAPPTQPLAPPPVPSLQSPPSKPAPPTPPAKKAAPAPRLAGPPGRTASPNKTAVPAPAKPKVNRPEIVSLKDNRGQARSPGDREEKVAIAAPEPPKPKVELRRPKPPRPEEDENLPELLEFPPLSRGKGVDGDNDADDGDLLSTEKPKPKLKRPTPPRLGKPDQWEDDEDEKANKAKAANKGKRRPKMDDDDDDLDIDGDNGPKPTLVSLSIARPPKPKSLAAKPSTPTVAKVKKPTLKSEAGSSAGGSSRSRGDR…	translation initiation factor IF-2	translation initiation factor IF-2
NC_000911.1:3148975-3151977:-	NC_000911.1	HRIBO	CDS	3148975	3151977	-	sll0041	SGL_RS16485	pixJ1, pisJ1, taxD1	3003	1001	Yes	1.03527	4.02543	2.53035	0.712496	3.46626	2.08938	57.83	237.42	55.86	58.98	55.86	58.98	39.8	204.44	ATG	TGA	TGGTAAGTTTTAACC	ATGACCCAAAATCCTTCCTCCGATCGCCGTCCTGACACTGCCCAATCCGTCGCCAATGGCGAGACCCTTGATGGCGCTCTTTTTACTGGGTTGACGGACACGGCCGCTGCCCAGGACGAATCGTCGGAAACCAGCGCTTCTTTTGCCACCATCGATGGAGAGGATAAAAGTGAGGTAGGGGATGCCCTGGATTGGTTTAGCGATGGCAAGGAAACTGACATCAACGGGGATGAGGCAGACCGTGGAATCCAGGCAGATACACAAGCAAAAACATTGGTTTCCCTGGAAAATTTGACCGAGGAACCGGAGATAGATGGGGCTGAGTTCATGGCAGAGGCTTTTATAGCAGAAAATACCGCCGTGGAGGATGTTTCCCCTAACCCCAACCCCGCCATTGAC…	MTQNPSSDRRPDTAQSVANGETLDGALFTGLTDTAAAQDESSETSASFATIDGEDKSEVGDALDWFSDGKETDINGDEADRGIQADTQAKTLVSLENLTEEPEIDGAEFMAEAFIAENTAVEDVSPNPNPAIDTDALAALTQSAVELTPPPPINLPKVELPPMQPLAPLMAIADPDNLSPMSTSIQAPTQSGGLSLRNKAVLIALLIGLIPAGVIGGLNLSSVDRLPVPQTEQQVKDSTTKQIRDQILIGLLVTAVGAAFVAYWMVGENTKAQTALALKAKHSHRNLDQPLAVAGDELAIADQTIDALSAQVEKLRHQQDLSLKQAELLTELSRANLSDIDEIQGVIQKNLDQARALFGCERLVFYYHPRYQPEAMVVQALDLTTQGLIDSKDPHPWGQ…	phytochrome-like photoreceptor protein for posi tive phototaxis, homologous to methyl-accepting chemotaxi s protein	phytochrome-like photoreceptor protein for positiv e phototaxis, homologous to methyl-accepting chemotaxis p rotein
NC_000911.1:1084757-1087753:-	NC_000911.1	HRIBO	CDS	1084757	1087753	-	sll1353	SGL_RS06945	hik15	2997	999	Yes	0.445645	2.03167	1.23866	0.393516	2.11333	1.25342	7.01	12.19	15.73	6	15.73	6	6.19	12.68	ATG	TAG	CAGCTCCGGTTTCCC	ATGGGCAAATTTCTTGATCTCCTACAAAAATACTGGCTTTTGCCCTGCCTTTTGCTAGCGGGTTACGGGGGAAACTATTTCAAGTTACATATATTTTTTGGAGTTGATTTTCTTTTTGGCAGCATTGCCACTTTACTGGTTTTGGTTTGCTATAGCTTGCCCTGGGGTCTAGTTAGTGCGGCGATCGCCGGTAGTCACACCCTGATCATTTGGCGCCATGGCTACGGCATATTAATAATCATCCTGGAAGCCCTGGTGGTGGGCTTGATGTTGCGCCGCCGGCAAACAAACTTAGTCCTAATTAATAGTCTCTTTTGGCTATTAATTGGCATACCGTTGGTTTATATTTTTTACCGTTGGGGCTTAAATATGACCTCGGTTACCACCAGTTTAATCACT…	MGKFLDLLQKYWLLPCLLLAGYGGNYFKLHIFFGVDFLFGSIATLLVLVCYSLPWGLVSAAIAGSHTLIIWRHGYGILIIILEALVVGLMLRRRQTNLVLINSLFWLLIGIPLVYIFYRWGLNMTSVTTSLITLKQATNGIFNSLIASFLITGFGLSKQKFSPSTNPAFFPWKKLSFEQTLFNLLVAFVFFPLFFITVVNGQEAFVQMEKQTVQELTALSIPIQNSVEDWYQSHLEGAEVFATEILPLVAAINQGNGAQLPALSLMTHTIQTAFTGFSNIYVGDRQGQIIASSPEFNEVGESRLGLIQAEKIAGFSIPSQIQVSPLHRTNVNVDPHVAITIPLVANNSFEGFINASLNLAKMKDLLYANRVSKELNITLINGQNQVVASTIANVLPLEI…	two-component sensor histidine kinase	two-component sensor histidine kinase
NC_000911.1:2054482-2057472:-	NC_000911.1	HRIBO	CDS	2054482	2057472	-	sll1528	SGL_RS11600		2991	997	Yes	0.327956	3.58933	1.95864	0.128242	1.83847	0.983357	16.06	73.33	48.97	20.43	48.97	20.43	6.28	37.56	ATG	TAA	CCTAGATTTGCTTTC	ATGAAGGTATTAATCACAGATTTTGACCTATTTGCCAAAGTAGGTGGCGGGCAAACTTTTTACCGCAGTTTAATTCGGAAAAACCCCGATATTGACTTTTATTACCTGATTGACAAAGAAGCTCGTGTAACTGAACGCCCTGATAATGCCCACGGAGTCCCCTTTCAGGAAAAATATTTCCTCGCCGATTTAAACAATTTTTTTGACGTTAATCCCCCTAAATGGGTTTATCGTTCCTTCATCAGGGCCAGTAATATTGCCACGTCAGTGGCCGGCATGGAATTTGATTTGATCGATTCCCCTGACTATGAACAATGGGCGATTTTTTTGCGTCCAGCCCTGGATTACCATCGGGTGAAATTTGCTAAGATTGCCCTTTCTCTCCACGGCAAAATTTCC…	MKVLITDFDLFAKVGGGQTFYRSLIRKNPDIDFYYLIDKEARVTERPDNAHGVPFQEKYFLADLNNFFDVNPPKWVYRSFIRASNIATSVAGMEFDLIDSPDYEQWAIFLRPALDYHRVKFAKIALSLHGKISTTLKLDWFNQGKENIPLELEEWKQYATVDLRYGISKSYIDEWQSLSRFSAHYYHPLHFFELPQPLEAIASGDRPDLNFVGRTEKRKGPDIFIDIAWWLNRNLYHEANIIGPHSFNDTGTISSETYLRSMLGDRQSPVKFLPPKPQQELMGLFARKTVTFVPSRYDTLNLVALESLFSGCPTVVGGGAGVCRLLKEDFPDVPFVEIDLDNIYSCLPAIENILSDYNNYRRRLVDSVKNSTAIADSPILADIYQQTGQYEEEIRDELQ…	unknown protein	unknown protein
NC_000911.1:1966146-1969118:-	NC_000911.1	HRIBO	CDS	1966146	1969118	-	sll1561	SGL_RS11170	putA	2973	991	Yes	0.328621	4.17589	2.25226	0.133359	1.12355	0.628455	25.8	97.34	78.51	23.31	78.51	23.31	10.47	26.19	ATG	TAA	CCCAGAAGATAAGCC	ATGGTTGCACAAATCGATTCACAACAACAGTATGAACAGGCCACCCAGGCGATCGCCAAGGAACTATTAGCCCAGACCAGGGAGAAAAGATCGCTGTGGGACAAAATTGGCGATAATCTGCGGCTCGATGACAAGTTGCTGGATTGGACCATGGGTCATCCTGGATTGCGGGTGCAATTGTTCAAATTTATCGACTGTCTGCCAGCGTTGCAGAGTAACAGTGAGATTGCCAACCATCTCCAGCAGTATATGAGCGAAGAGGAGGTGGAATTACCAGAAGCACTGAAAAAATTGTTGAATTTTGCCGATGCCCACTCGACGCCGGCCCAGATTGCAGCGGGAACGGTGAGTAAAGCGACGGAACAGTTGGCTTTTAAATACATTGCTGGGGAAACGATC…	MVAQIDSQQQYEQATQAIAKELLAQTREKRSLWDKIGDNLRLDDKLLDWTMGHPGLRVQLFKFIDCLPALQSNSEIANHLQQYMSEEEVELPEALKKLLNFADAHSTPAQIAAGTVSKATEQLAFKYIAGETIAQVIKTVERLRKEKMGFTIDLLGEAVITESEAAEYWQNYLDLMAQLSQQAKSWSKVPQIDQADGEILPQVQVSVKLTAFYSQFDPLDPAGSKAKVCERIRELLRRAQELGVAVHFDMEQYHYKDLILNILKELLVEEEFRSRTDVGITMQAYLRDSTEDLEALIPWAKHRGYPVTVRLVKGAYWDQETIKAQQNHWQIPVYVEKAQTDANYERMTRLLLENHEYLYAAIGSHNVRSQALACAIAEELNIPKRRYEMQILYGMGEPL…	proline oxidase	proline oxidase
NC_000911.1:1062238-1065204:-	NC_000911.1	HRIBO	CDS	1062238	1065204	-	sll1362	SGL_RS06865	ileS	2967	989	Yes	0.452211	4.91328	2.68274	0.128674	1.16463	0.646654	17.08	72.52	37.77	14.76	37.77	14.76	4.86	17.19	GTG	TAG	CTGCCCCAAGCCACT	GTGACTGAAGCCAAAAGTTATAAAGACACCGTTAACTTGCCCCAAACCCGCTTTGATATGCGGGCCAACGCTAACAAAAGAGAGCCGGAAATTCAGCAATATTGGCAGGAAAAAGGAATTTACGCAGATTTAGCCGACAATAATCCCAAAGATTTGTTTGTGCTCCACGATGGGCCGCCCTACGCCAACGGTGCCCTCCACATGGGCCATGCTTTAAACAAAGTTCTCAAGGACATTATTAATAAGTATAAACTATTACAGGGGCATAAAGTCCATTACGTTCCCGGTTGGGACTGCCACGGTTTGCCCATTGAGTTGAAAGTTCTACAAAGTTTAAAAAGCAGTGAACGGGCGGAATTAACTCCCCTCACCCTCCGTCACAAAGCCAGGGATTTTGCC…	VTEAKSYKDTVNLPQTRFDMRANANKREPEIQQYWQEKGIYADLADNNPKDLFVLHDGPPYANGALHMGHALNKVLKDIINKYKLLQGHKVHYVPGWDCHGLPIELKVLQSLKSSERAELTPLTLRHKARDFALKAQQEQAVGFQRYGIWGDWKKPYLTLTPEYEAAQIGVFGAMALKGYIYRGLKPVHWSPSSRTALAEAELEYPEGHTSRSIYVSFPITQAGEKAAEILAPYIDDLAVAIWTTTPWTLPGNLAVALNPELTYAVVETESHIFHRSYLIVALDLVEKLSETFGVKLTVKVTLQGESLENTCYQHPLFDRVSPIVIGGDYVTTESGTGLVHTAPGHGQEDYVVGQRYGLPILSPVDAAGNLTEEAGKFAGLNVLNDANEAIINALQDQK…	isoleucyl-tRNA synthetase	isoleucyl-tRNA synthetase
NC_000911.1:3104142-3107102:+	NC_000911.1	HRIBO	CDS	3104142	3107102	+	slr0707	SGL_RS16290	polA	2961	987	Yes	0.665446	2.1959	1.43068	0.573455	1.12645	0.849951	14.54	24.66	21.85	11.23	21.85	11.23	12.53	12.65	ATG	TAG	CTTGCTTCTTGGTGC	ATGTTTATGTCTGCTAAATCCCCTTTGTTATTGTTAGTTGATGGTCATTCCCTGGCATTCCGGGCTTACTATGCCTTTGGTTTGTCTAAAAAAGGCCCTCTGCGGACAACGGCCGGCATTCCCACCAGTGTATGTTTTGGATTTTTAAATTCCCTCATGCAGGTGATGGAGTCCCAAAAACCAGCGGCGATCGCCATTGCCTTTGACCGTCGGGAACCCACTTTTCGCCATGAGGCCGATGGGGCTTACAAATCAAACCGCCAGGAAACCCCAGAAGATTTTGCCGAAGATTTAAGTTATCTCCAGCAATTGTTGGAAGCTCTCAATTTACAAACCATCACCTATGCGGGCTATGAAGCCGATGACATTTTGGGCACTCTAGCTTGCCAGGGGAGTGAC…	MFMSAKSPLLLLVDGHSLAFRAYYAFGLSKKGPLRTTAGIPTSVCFGFLNSLMQVMESQKPAAIAIAFDRREPTFRHEADGAYKSNRQETPEDFAEDLSYLQQLLEALNLQTITYAGYEADDILGTLACQGSDAGYQVKILSGDRDLFQLVSPEKNISVLYLTRNPFSSNTGYDELDWQGVVDKMGVTPAQIVDFKALCGDKSDCIPGINGIGEKTAIKLLAEYETLEKVYENLAQIKGALKTRLDNGKDDAMHSQMLARIVVDVPLPVTWEDLQLTGFSTDRLVPLLEKLELRTFIDKIQAFHRNFSDNQSPVPMGNEADNGEPKKTVKAKKSKEKVNPDDSQQLSLFDGVPVVNQEDGLITIQLPKQIQPQIITTIAQLEALVEELKKHTDADFPVA…	DNA polymerase I	DNA polymerase I
NC_000911.1:2134202-2137153:+	NC_000911.1	HRIBO	CDS	2134202	2137153	+	slr0293	SGL_RS11955	gcvP	2952	984	Yes	0.346441	5.41805	2.88224	0.15774	1.07299	0.615366	15.33	81.65	44.25	15.07	44.25	15.07	6.98	16.17	ATG	TAG	CCCTACTCCGCCATT	ATGCCCAACCTAGAGCCCGCCGTTGTTGTCCCTACCTCCGAGGCGATCGCCGTTGACCTGACTAAGCTAGAGGAGAAGTTAGCTCCGGCGGATAGTTTTTTGGATCGTCACTTGGGCCCCGGAGAAACGGAACAGCGGCAAATGCTCCAGACACTGGGTTTTGATACTTTGGGGGATTTGATTGACCAAGCCGTGCCCCCGGCCATTCGCTTTCCCCGGTCTTTGCAACTACCAGCTTCCCAAAGTGAGTATGGGGCGATCGCCCAACTGAAATCCATTGCCTCCAAAAATCAAGTTTTTCGCTCCTATATTGGCATGGGGTACTACGACACCATCACCCCGCCGGTTATCCAACGGAACATTTTAGAAAACCCCGGTTGGTACACAGCCTATACCCCC…	MPNLEPAVVVPTSEAIAVDLTKLEEKLAPADSFLDRHLGPGETEQRQMLQTLGFDTLGDLIDQAVPPAIRFPRSLQLPASQSEYGAIAQLKSIASKNQVFRSYIGMGYYDTITPPVIQRNILENPGWYTAYTPYQAEIAQGRLEALLNFQTMVMDLTGLEIANASLLDEGTAAAEAMALSYGVSKSKANAFFVAQDCHPQTIEVIKTRANPLGIEVIVGDHHTFSFSTSIFGALLQYPATDGAVYDYRSFIDKAHQHQALVTLAADPLSLTLLTPPGELGADIAVGSTQRFGIPLGYGGPHAAYFATKAEYQRKMPGRIVGVSKDAHGNPALRLALQTREQHIRRDKATSNICTAQVLLAVMASMYGVYHGSTGLKNIALRIHQLTVLLAIGLKRLNYS…	glycine dehydrogenase	glycine dehydrogenase
NC_005230.1:182-490:-	NC_005230.1	HRIBO	CDS	182	490	-	sll7001			309	103		2.42542	1.28767	1.85654	13.782	15.4776	14.6298	159.18	35.72	65.63	27.74	65.63	27.74	904.51	429.35	GTG	TAG	AAATGGTGGGAATTA	GTGATGTGTGCATATTGTATGATTTGTTTTTATGATGAGAATTTTAATTCGACTCTAAATTCAACGTCAAAGTATCATCAAAAGCATGAAAAATGGGATAAAGAAGAAGGGTGGAAAAAATGGCTAAACAACCTACGATTAGTGATCTCTGTATTTAATGCAATAAATCTTATCAAAAAGTGGTTAAAAGTATTTCCATTTGCCCATATTTTGGATGAATTAACTAAACTTTACAACAAGGTTAATAAGCTAGATCGATTAAAGTATTTGCTAAATTCATGGAATACATTCTATTCTTCTTCTGCCTAG	VMCAYCMICFYDENFNSTLNSTSKYHQKHEKWDKEEGWKKWLNNLRLVISVFNAINLIKKWLKVFPFAHILDELTKLYNKVNKLDRLKYLLNSWNTFYSSSA	transposase	ORF_ID:sll7001
NC_005230.1:706-1287:-	NC_005230.1	HRIBO	CDS	706	1287	-	sll7002	SGL_RS00635		582	194		0.557513	0.351184	0.454348	1.50067	1.283	1.39184	140.85	113.78	252.64	323.99	252.64	323.99	379.13	415.68	ATG	TAA	TCAGTACTGCATTTC	ATGACAGATTTTCCTTGGGAATTAAAAGAATTAGAAAAAAGAAGATTAAATATTATCTTAGAAATTTTAGAAGGAAGAGAAATAATAGTAATAATAGATGAAACAGGAGACCCCAAAAAAGGGAAAACAACAGATTATGTAAAAAGACAATATATTGGAAATTTAGGAAAAATAGAAAGCGGTATAGTGTCAGTAAATGCTTATGGTTACTGCGATGGAGTAACGTTTACTCTAGAATCAAAAGTATTTAAACCAAAAGAAAGATTAAAAGAGGGAGATAAGTATAAAACAAAGCCGGAATTAGCAGTAGAGATAATAAAAGAACTAGAAGAAAGTGGTTTTAAAATAAAAAGAGTAGTGTCAGATAGCTTATATGGAGAAAGCCATAGCAATTTTATC…	MTDFPWELKELEKRRLNIILEILEGREIIVIIDETGDPKKGKTTDYVKRQYIGNLGKIESGIVSVNAYGYCDGVTFTLESKVFKPKERLKEGDKYKTKPELAVEIIKELEESGFKIKRVVSDSLYGESHSNFISAVEELKIEYAVGIWSNHGVWLPKEAKVRANKWRRFEHIRWDGKQEDRYIREIVYGKKAQ	transposase	ORF_ID:sll7002
NC_000911.1:701343-704267:+	NC_000911.1	HRIBO	CDS	701343	704267	+	slr1393		hik1	2925	975	Yes	0.235679	1.84584	1.04076	0.333508	1.59758	0.965541	9.01	31.97	38.23	17.32	38.23	17.32	12.75	27.67	GTG	TGA	AAGCGGAAGCCACGG	GTGGTCATAATTGGATTACTCCTAGTAAAAGTCTATGTTAACTATTGTAACACTTTTTTAAGGAATGTAACAATGTCCCCTTCTTCCCATGGCACCGCAGTCCAACAGGCGATCGCCGATCAACTGTTGGAAATGATTCTCCAGTCCCAGGATTTACATAATGCTTATCGACTGGTGGTGGAAGGATTACAGCGGGGTTTGGGGGTAGACCGGGTGTTGTTGGTGCAAAATGCAGTGTTCCCGAACCGTCAATCCCGCCTTGTGGCCCAGGCCATCGCTCCGGCCAGGGATATTATGCTTTTGGATGAACCCTGTGCCGATTGTCGTTGGCTCCATCTGCTGGGGCAGCTTCCCCACTACGGGCTGTGGACAGTGTGGGAGGGGGAAGGTGAATTTGTC…	VVIIGLLLVKVYVNYCNTFLRNVTMSPSSHGTAVQQAIADQLLEMILQSQDLHNAYRLVVEGLQRGLGVDRVLLVQNAVFPNRQSRLVAQAIAPARDIMLLDEPCADCRWLHLLGQLPHYGLWTVWEGEGEFVQLDPVQGEFCRTLGIKSLLHLPLVINQRHWGVLSLQYLHQARPWPLEDQQFAQRIAHLFCLGLMKTELWIHCQNHKNALQTVVAEGQVQRETYLKSAQRERAIADVIDKIRFALDLRSLFQTTVTEVRKLLVADRVMIIKVRQNKNFSWGEIQAEAQTDDKLCLLPPKERVPLSSRWIDHFAKGLILAMDDTDDQRADFDQSMLALAKANLVVPLFSGDRLWGVLSVHQCDGPRVWESSDIEFALKIALNLGVALQQAELLTESQR…	phytochrome-like protein, two-component sensor histidine kinase	phytochrome-like protein, two-component sensor his tidine kinase
NC_000911.1:962888-965800:+	NC_000911.1	HRIBO	CDS	962888	965800	+	slr1844	SGL_RS06380	uvrA	2913	971	Yes	0.262995	1.46786	0.865429	0.185953	0.898089	0.542021	8.5	25.35	32.32	17.27	32.32	17.27	6.01	15.51	ATG	TAA	GCCTTGTCTCCCCCT	ATGCCCGAACAAAATAGCATCCGTATTCGAGGCGCTAGACAACATAACCTAAAAAATGTGAATCTAGACCTGCCCCGCGATCGCCTGATTGTGTTTACGGGGGTGTCGGGGTCAGGCAAATCTTCCCTAGCTTTTGACACTATCTTTGCAGAGGGACAACGGCGTTATGTGGAATCCCTCAGTGCTTACGCCCGACAGTTTTTGGGGCAGTTGGATAAGCCTGATGTGGACAGCATCGAAGGGTTGAGTCCGGCTATTTCCATCGATCAGAAATCCACTTCCCACAATCCCCGCTCCACCGTGGGTACGGTAACGGAAATTTACGACTACCTCCGTCTGTTATTTGGCAGGGCTGGCAGTCCCCATTGTCCCCACTGCCAACGGAATATTGCCCCCCAA…	MPEQNSIRIRGARQHNLKNVNLDLPRDRLIVFTGVSGSGKSSLAFDTIFAEGQRRYVESLSAYARQFLGQLDKPDVDSIEGLSPAISIDQKSTSHNPRSTVGTVTEIYDYLRLLFGRAGSPHCPHCQRNIAPQTIDQMCDRVMELPDRTKFQILAPVVKGKKGTHVQLLSSLVSQGFVRVRINGEVRELSDNIELKKNQAHTIEIVIDRLIKKEGLQERLVDSLSTCLKQAEGTAIIDILDKPTLAVLDGGKKDDKEALKAAENGQAYHAELPKEIIFSENFACPEHGAVMDELSPRLFSFNSPYGACPDCHGIGFVRSFCPDLVIPDPEKPVYVAIAPWSEKDNSYYLSLLYSLGQHFDFQLQTPWKKLTKEQKEIILYGTEEEIWFEGESRYRNKQG…	excinuclease ABC subunit A	excinuclease ABC subunit A
NC_000911.1:1306436-1309348:-	NC_000911.1	HRIBO	CDS	1306436	1309348	-	sll1687		hik17	2913	971	Yes	0.270308	2.32183	1.29607	0.133253	1.24097	0.687112	13.51	43.07	49.98	18.55	49.98	18.55	6.66	23.02	GTG	TAG	GTTAACCTGAAGAAG	GTGAGGGTATCTGACAAAAATTCCAGATTACACAGTTATCAATATCAACTCTATCCGTTAGTCAATGGCGGCTCTCAGAATTATATGGGCGATGAGCACCAAGATATTGGCAAGGTAATAGCAAAACTGGAAACTTCAAAGGAAGTCGTTGCTAACCTAAAACTCCAGACCTTTCTTCGTTCTGCTTTTCTCTCAGAGGCATCACATATTAACAGTGGTGAGGATGTCGGCAAATTTCTAGAGGCTATCCTTCAAGAAGGGGAAGAAATGTTTAATTACCTTGCCAACCACGCCCCGGTTTTGATCTGGATTGCTGGCTTAGACAAAGGCTGTTTTTATTTTAATCAACCTTGGCTCAATTTTACTGGTCGCACTCTGGAACAAGAGCAGGGCAATGGT…	VRVSDKNSRLHSYQYQLYPLVNGGSQNYMGDEHQDIGKVIAKLETSKEVVANLKLQTFLRSAFLSEASHINSGEDVGKFLEAILQEGEEMFNYLANHAPVLIWIAGLDKGCFYFNQPWLNFTGRTLEQEQGNGWAEGVHPDDFDRCWQTYVEAFDARQPFTMEYRLRNRGGEYRWLLDNGVPRLAPDGEFLGYIGSCIDITERYEARQAIEESEEKYRSLVESINTIIVRWLPTGEITFANEYCHNFFGFSKEEMVGKSVFDTIVPRTSSSGQNLEAMVADICRNPENYKYNENENVRKNGDRVWVAWTNEPIFDSQGNLLEILGSGIDITSRKLAEEQLRQREAELSEAQSLAKLGTWKFLSGSGEIQWSEEILRMFGLEHPPSYEELTASIHPGDRQ…	unknown protein	unknown protein
NC_000911.1:803466-806354:-	NC_000911.1	HRIBO	CDS	803466	806354	-	sll1076	SGL_RS05605	pacL	2889	963	Yes	0.830144	1.08399	0.957067	0.751507	0.943832	0.84767	31.67	20.65	38.15	19.05	38.15	19.05	28.67	17.98	ATG	TGA	ATCTTTGTTGCACCG	ATGAATTCCTCCACCACGGTTTGGTCTATTGCCCCAGAAGCGGTTTACGAAAGGTTGGAGACGAGTCCCCAAGGTTTATCCGGCGAGGAAGCGGCCCGAAGATTGCAACGCTATGGACTGAACGAGCTGGCGGAACCGGTACAACGACCTTTATGGTTGCGTTTTGTTGATCAGATGACCCATTTCATGGCGTTATTGCTCTGGGTGGCGGGCATTCTGGCTTTTGTTTCCGGTACGCCGCAGTTGGGCTGGGCCATTTGGGCGGTGATTTGGATTAATGGTTTATTTAGTTTTAGTCAGGAATTTCGGGCCGAAAAAGCCCTGGCGACCCTCAAGAAAGTTCTCCCAGCCCAGGTAAAAGTTTATCGGGACGGCACTTTACAGTCTGTTCTGGCTAGG…	MNSSTTVWSIAPEAVYERLETSPQGLSGEEAARRLQRYGLNELAEPVQRPLWLRFVDQMTHFMALLLWVAGILAFVSGTPQLGWAIWAVIWINGLFSFSQEFRAEKALATLKKVLPAQVKVYRDGTLQSVLARELVRGDVVQLEEGDRVSADLRLVSADSLYVDVSVMTGESLPVARFAESAQIREVVPKRGGQVLVHGGERALQDPVKAQEIRNLVLAGSTIATGRGVGVVYATGAETEFGHMAHLTTNVKREPSTLEVQISQIVRVITLIAVGMGVLVFVLASLVTHLELKESFIFAIGIIVALVPEGLLPTVTLSLAMGVQRMAKRNALVRRLSAVETLSATTVICTDKTGTLTKNEMTVRSLWIPATNHGQTLTVPGEGYDPSTGKITFPPGKDE…	cation-transporting ATPase PacL	cation-transporting ATPase PacL
NC_005230.1:1399-1827:-	NC_005230.1	HRIBO	CDS	1399	1827	-	sll7003	SGL_RS00640		429	143	Yes	2.0479	1.20731	1.6276	2.30195	1.7716	2.03678	18745.4	5994.01	9153.49	4964.77	9153.49	4964.77	21070.9	8795.58	ATG	TAA	TTGAGCGAATACAGG	ATGACAGAGCCAGTCAAATATTTGATTGATACCAACGTTATTAGTGAGCTACGGAAACAAGATAGGGCCGACCCCGGTGTACTAGCATTTTTTCAGCAAGCTCAGCATCTCTATTTGAGTGTGATTACCATTGGGGAATTGCGGCGGGGTGTGGAATTAATCAGGCATCGGGGAGATGTTCAACAAGCCAATTTACTGGAGGAGTGGTTGGAAATTGTAATTGCTGATTACGCTGACCACATCCTAGATTTCACCATCTTCGAGGCTCAAGTTTTGGGAAAGTTGCGGGTTCCTAATCCCCATAACGCCCTAGATAAACAAATTGCCGCCACTGCCCTTAGTTATGGACTGACCCTAGTTACTCGCAATGTCAAGGATTTTGCCGACACAGGAGTTTGT…	MTEPVKYLIDTNVISELRKQDRADPGVLAFFQQAQHLYLSVITIGELRRGVELIRHRGDVQQANLLEEWLEIVIADYADHILDFTIFEAQVLGKLRVPNPHNALDKQIAATALSYGLTLVTRNVKDFADTGVCLLNPFTGNQ	plasmid stability protein	ORF_ID:sll7003
NC_000911.1:1713409-1716270:+	NC_000911.1	HRIBO	CDS	1713409	1716270	+	slr0822	SGL_RS09955		2862	954	Yes	0.254045	1.50949	0.881765	0.229773	1.30352	0.766648	7.85	22.28	30.9	14.76	30.9	14.76	7.1	19.24	ATG	TAA	TAAGCCTACTTTTTA	ATGTCTGACCCTGATGTGTCCGTCTCCCCAGTTAAGGCCGAGGCTTGGTATAGCTATGGCATCGATAAAACCCTGCATCGGTTGACCACTGCTCCCCACCGGGGGTTGGCAGAAAAAACTGTGATGGAACGAAGACGCACCTATGGACTAAATGAAATTACCACGATCGCCGGTCGTAATAATTGGCAAATTTTGCTGGATCAGTTCACCAATGTCATGCTCTTGATGTTGATCGGGGTGGCAATTATTTCTGGAGCATTAGATCTGATCAGCTTAAGGTTGGGGGAAGAAACCATGGAGGGTTTTCCCTTCAAGGACACGATCGCCATTTTTGCCATTGTTATCCTGAACGGTTTATTAGGCTATTTCCAGGAAAGTCGGGCGGAAAAAGCTTTAGCT…	MSDPDVSVSPVKAEAWYSYGIDKTLHRLTTAPHRGLAEKTVMERRRTYGLNEITTIAGRNNWQILLDQFTNVMLLMLIGVAIISGALDLISLRLGEETMEGFPFKDTIAIFAIVILNGLLGYFQESRAEKALAALKKMASPKVQVLRDGDRQEIKAASLVPGDIILLEAGSQLCADGQLIEAANLLIRESALTGEAQPVEKNASNTGLPLDTPLGDRQNMVFSGTEVVQGRGKVVITNTGMATELGKIAEMLQRVAPEPTPLQKRMENLAGVLVSGSLLLVTLVIILGVWQSGWGELRQLVETSLSMAVAVVPEGLPAVITVTLALGTQRMIKRHALIRKLPAVETLGSVNVICSDKTGTLTQNKMVVREVLTHGDRLSIGGEGYQPQGNIIHLSDGEQ…	cation-transporting P-type ATPase PacL	cation-transporting P-type ATPase PacL
NC_000911.1:687391-690252:-	NC_000911.1	HRIBO	CDS	687391	690252	-	sll1294	SGL_RS05080	pilJ	2862	954	Yes	0.641376	7.75272	4.19705	0.216179	0.753668	0.484923	60.02	327.63	93.58	42.26	93.58	42.26	20.23	31.85	ATG	TAA	TTACTTTTAATCGCC	ATGGTTAGCACCCCCACTAAACCCCAATTTTCCCAAGAGATTCTGGAACTGCAAGCAGCAGCCATGGCTGCCCCGGATGATCTATTTGCCCAGATCGTCCTGGCCGGTGCTCTCCAGCAAGAGGGTTTTTGGGAGGAAGCGGCCCAATACTATCGTCAAGCCCAGGAGTTGGACAGTGACGGCATTTATGGCGAAACCATCAGTAAGGCTTTAGCGGAAATTCAGCCTAATTTACCAGCGGTGGAGGAAATCCCCGCTATTCCCCAACCCCTGACTGAGGAAGAGAAGAAGCAGGTCTATCCGCCAGAGATTCTTATGCTCCAGGAGACGGTGCAAGAGAGGCCCGACGATCTGGTGGCCCAAATAAGTTTCGCCAGTGCCCTAGAAGCGGGGGGATTT…	MVSTPTKPQFSQEILELQAAAMAAPDDLFAQIVLAGALQQEGFWEEAAQYYRQAQELDSDGIYGETISKALAEIQPNLPAVEEIPAIPQPLTEEEKKQVYPPEILMLQETVQERPDDLVAQISFASALEAGGFLTDALQAYEDLKINDEEGIFHATCDQAIAGIEAQLADPNRITPAMAWTGTLKYAAATDDLALDEERSNLTLQKRWANLPIATKQFTALLVSSAITVVAVVGTGMMIAISSGRFQLKNQTLAELVVTEGNYNIKIDQMSFGFRGQSDNLAIIQAARLYSERQPIPAPLAAQVRDILKNETASRDIEYATLVGQDQRIIASANAQRNGQIFDPSNLVTLRMGYPGQIKFSTIVSKEELEKELPPGIDNLEQENALIRYTVTPVQDPQS…	methyl-accepting chemotaxis protein	methyl-accepting chemotaxis protein
NC_000911.1:1572849-1575701:+	NC_000911.1	HRIBO	CDS	1572849	1575701	+	slr2104	SGL_RS09220	hik22	2853	951	Yes	0.277406	2.12903	1.20322	0.129812	1.00572	0.567764	26.52	52.14	95.6	24.49	95.6	24.49	12.41	24.63	ATG	TAG	TCTGTCTCCCCCAGA	ATGAAGTCTTTTTTCCTCAACACATTTTCTCCGTTGCGTAGTACGGCCAGATTCTGGGTGTTAGTGGCCTTACTCACTTCCATGGAGTTATCTGCCAGCCAGTTGAGGGATACGGAACAAGCGGTGGCCATAGAGGAGTCAAAATGCACCGATTGCGTTGAAGGTAGGGGGACAGGAATTGTTCGGGGGGAAAGTTTTGCCCAGGTTGAAACGGTTCCCACCGAGGCCAAGGTGGAGCAGATAAAGCCAATGATCGAAAGAATAAGTCCACATCTAGGATTGGTGGGGTTCGGACTGGCGTTTATCGGGGTATTATGGCTGACTTATTTGCTCAAAAAAGATCGGCAAACCAAGGCGCAATTAGCTTTTCAAGCACGGCGGTCCGATGTTTTGTTGGAA…	MKSFFLNTFSPLRSTARFWVLVALLTSMELSASQLRDTEQAVAIEESKCTDCVEGRGTGIVRGESFAQVETVPTEAKVEQIKPMIERISPHLGLVGFGLAFIGVLWLTYLLKKDRQTKAQLAFQARRSDVLLELPQYADRLSEVEFLQRGQEFAEELTKSKIAFIHFVNDDEQTIELVAWSRATLANYCRVVAASHYPVEEAGIWADALRLRRPVLINDYATHQGKKGLPEGHAYLARLISVPVIDDGKVVMLTGVGNKDVFYTDQDVETVQLISNEIWRIARSRRLVKKLTESENRYRLAQAIAKIGNWELDYATNVLFWSPEVFNLFEIAPQDFAGTYEAFLNLIHPGDRELVDEAYQCHLQKYQPYDIVHRLLMPDGRIKYVQEQCNTVFDKNNLP…	two-component hybrid sensor and regulator	two-component hybrid sensor and regulator
NC_000911.1:3214581-3217427:-	NC_000911.1	HRIBO	CDS	3214581	3217427	-	sll0499			2847	949	Yes	0.357038	3.31094	1.83399	0.321114	3.30518	1.81315	4.87	17.25	13.64	5.21	13.64	5.21	4.38	17.22	ATG	TAA	CCTTATTTAATCTTG	ATGGATGGGGAAGGTAATAAGTTGGCAGAAAATGATGATTTATATGACACTAATGCGGGGATTTTAATCAATCAAATCGATCCCCAAGGGTATGGGGTAGTGGTTACTAGTAATAAATCAGGGGTAACGGGAAAATATAAACTGCAAATTATTCTGCCCGATGCTAACCAACTAGTCGAAATCCAAGGGCATCAATCCTTAATTAAAGCCCAGGCCATGATGGATGAAGGTTCAAAGGAATCCTTACTCCAGGCCATCGAATTATTTACCCAAGGTTTGGAATTTTATCGGCAAATAGGCATTGTTAATCGGGAAACAGTATTTGCTCTCAATCGTTTAGGCACCATCTATTCTGACTTTGGCGAAAAATCCCAAGCTCTGGCCTATTATGAACAAGCG…	MDGEGNKLAENDDLYDTNAGILINQIDPQGYGVVVTSNKSGVTGKYKLQIILPDANQLVEIQGHQSLIKAQAMMDEGSKESLLQAIELFTQGLEFYRQIGIVNRETVFALNRLGTIYSDFGEKSQALAYYEQAIPLAQQLQDKALEGATLNNIGSIYNALADRKKAIDFYQQALVLIRQAGDKTEEMTTINNLGVAYDNLGESEKALQYYAEALALGKSLNDLETIGTSLSNIGLAYNNLGEREKALEYYQEALTMSRSVGDRQGEAVRLNNIALVYDGFGEKDKALQYYIESLIIAEAVGDQSLQGSVISNIALVLDGLGQKAQALEYYQQALELARLVGDRSGEGIRLNNIALLYDSVGEKDEALTYYKEALKISQETGDRLVEGAILSNIGYVYDG…	hypothetical protein	hypothetical protein
NC_000911.1:1734382-1737210:-	NC_000911.1	HRIBO	CDS	1734382	1737210	-	sll1253	SGL_RS10075	pcnB	2829	943	Yes	0.294386	2.2747	1.28454	0.202191	1.01285	0.607518	6.45	23.02	21.91	10.12	21.91	10.12	4.43	10.25	ATG	TAG	TTTGTTAGAAAACCT	ATGGATTTAATTCTTTGCCATCAAACGGCGGACTTTGATGTGTTAGGGGCGGCGGTGGGGCTAGCCAAACTCCATCCCGGCAGTCGCATTGTCTTGACTGGTGGTTCCCATCCCACAGTGCGGCAATTTTTAGCACTCCATCGTAACGAATTTCCCCTCATTGAACTGCGGAGCGTCAACCCCGACAAAATTCGTTCCCTCTACATTGTCGATAATCAACAAGGTGATCGCCTGGGCAAAGCAGCGGACTGGTTAACGTTGCCCCATCTGCGACAGGTTGCCATTTATGACCATCATCTCAACAGTCCTAGGGATATCGAAGCGGATATTTGGGAGCTGGAAGCGGTGGGGGCCAGTACAACTTTAATTGTGGAGAAATTACAACGGGCTGATATAAGT…	MDLILCHQTADFDVLGAAVGLAKLHPGSRIVLTGGSHPTVRQFLALHRNEFPLIELRSVNPDKIRSLYIVDNQQGDRLGKAADWLTLPHLRQVAIYDHHLNSPRDIEADIWELEAVGASTTLIVEKLQRADISLSMVEASVMALGIHVDTGSLTFTQTTVRDVKALAWLMEQGANLRLIAEYADPGFPPPLQFLFAEAMQNLHKEMVRGYWLGSVLLTTENFVPGLSHLTERLLSLTECDALLLGHVYDKGKDKTKNDEQREKTGVISNQRFSLIGRTRIPDTDLTQLLEPYGGGGHAQAAAVNLRDVEPTTVMAEIYQALQRQIPKPLLARDFMSSPVRTIRPHTTIEQAQRVLFRYGHSGLTVVNQEEKLVGIISRRDLDLALHHGFSHAPVKGYMT…	similar to polyA polymerase	similar to polyA polymerase
NC_000911.1:1962705-1965524:-	NC_000911.1	HRIBO	CDS	1962705	1965524	-	sll1563			2820	940	Yes	0.412803	1.59879	1.0058	0.309004	1.43911	0.874057	13.8	31.64	33.43	19.79	33.43	19.79	10.33	28.48	GTG	TAA	GGAAAAGCAGTTGAT	GTGTATATCAGAGTGGATTCGACAGGAGCTAAATTCGTAATGAGATCTTTGAAATATTTGACTTGGCTAGATGTTAAAAGATTTATTCGTAAAATTACTTTCAATGGAGAAAAACTGCCAGATTGTATTAATTCGATTTCATGCTTTTCTGATGCACTAGAAATTGGGATTCCAAATTTGAACTGTATAGAGGCTGCTCAAGGAATTTTAACTAAGTGGTTTCAAGACTGGTATCAGCTAGATCAGAATCTTATTCGCTTAGATCTTGGCGATGCAGCTTTGCCTATTGAGTTTTATGAAAATGAACCTTCACAATTTGATATTTCAGGTTTTATTCGTCCTTTCTGGCAGGAAATTGCATATATAAGCAGTGATTCAGATAGTAATATTGATTTAGTT…	VYIRVDSTGAKFVMRSLKYLTWLDVKRFIRKITFNGEKLPDCINSISCFSDALEIGIPNLNCIEAAQGILTKWFQDWYQLDQNLIRLDLGDAALPIEFYENEPSQFDISGFIRPFWQEIAYISSDSDSNIDLVKLTSKFHFPETALSSPKIIAFYSFKGGVGRTLHLASFLFALLEASKEHNKRITVLVVDADLEAPGLTYWDKSEKQRPAISFIDFLEAYHYTPIDRQETIVLLAEEIKKTPRYEEGSTFYFLPACLSNEQLLDTPVLPEHLARSPEGEWSCGNALHQLGIALSADYVLIDLRAGLSEISSPIIFDPRIQRFFVTTATEQSTAGMSLVLEQISHIAPSEEEISSGKFYDPSIIISFLTPELKKLSAFENSLEKFNSAYNPGDQSDDEN…	unknown protein	unknown protein
NC_000911.1:3098729-3101536:-	NC_000911.1	HRIBO	CDS	3098729	3101536	-	sll0672		pacL	2808	936	Yes	0.44067	3.00303	1.72185	0.281845	1.72755	1.0047	19.2	49.49	43.57	16.48	43.57	16.48	12.28	28.47	ATG	TAA	TATTTTTTCATCTCT	ATGCCTCCATCTGCTTCTTTTCAGGGCCAACCTTTGATTACCTGGCATACTCTTTCTGCAGATCAAGTCGTCAGTGACTTACATGGCGATCGCCAACAAGGATTAAGCCAGCAACAGGTGGCTGAAAATTTGCAAGTTTATGGAAAAAACGAGTTGATAGAAACGGGGGGGAGAACTTCCTGGAACATTTTAGTTGATCAGTTTACAAACATTATGTTGTTGTTGCTGATCGCTGTTGCAGTGATTTCGGCCGCAATTGATATTTATCAAGCCCAACAATTGGGTAAATTTATTTTTCCTAAAGATGCAGTTGCTATTTTTACCGTTGTATTACTGAATGGTATTTTGGGGTATGTGCAGGAACGGGGAGCGGAAAAGGCCCTAGCAGCCCTCAAAGAC…	MPPSASFQGQPLITWHTLSADQVVSDLHGDRQQGLSQQQVAENLQVYGKNELIETGGRTSWNILVDQFTNIMLLLLIAVAVISAAIDIYQAQQLGKFIFPKDAVAIFTVVLLNGILGYVQERGAEKALAALKDLSTSRVRVIREGKTTEVESTELVPGDLILLEAGVKVPADGRILEGANLQIREAALTGEAEAVMKQGDVLLPADSALGDRLNLVYSGTEVVQGRGTVIVTATGMKTELGKIASALQSVEPEPTPLQKRMTQLGNVLVSGSLILVAIVVVGGTLFKPDLFMQLVEVSLSMAVAVVPEGLPAVITVTLALGTQRMAKRNALIRQLSAVETLGSVTTICSDKTGTLTQNKMVVQSIISDRHRLVVTGEGYNPVGEFQAGEGEDLKIENIP…	cation-transporting p-type ATPase PacL	cation-transporting p-type ATPase PacL
NC_000911.1:1773346-1776150:+	NC_000911.1	HRIBO	CDS	1773346	1776150	+	slr1968			2805	935	Yes	0.358989	3.82371	2.09135	0.195065	1.35101	0.773039	6.11	24.51	17.02	6.41	17.02	6.41	3.32	8.66	GTG	TGA	TTTATTGGAGAAAAA	GTGGTCATGGCAGTGCGTTTTTTGTTCAACTTAACCTTTGCCTCCGTGGTCACAGTTTGTGTTTTGGGGGGCGGGAAATGGAGTTATATATCTTTAGCCCAGTCTCCCCCAGAAGTCATCTTGAAAGGAGAAAGTAAAACTCCGATCGCCACTGCTCAGCAATATTTTAATCAGGGTCTCAAGCATTATCAGCAGGGTAACCTAACAGATTTTCAAGCGGCCCAAAGTTCCTGGGAAGAGGCCTTGGCCCTCTGGCGGCAGGAAAATAATTTACCCCAGATAGCGGTCACGTTAAATTTTCTTTGTTTGGTTCAGCGTCAGTTGGCTCCCCCGACAAAGGCCTTAGCCTGTTACCAAGAGTTATTAACCACCGCCCAAGCCTTGAAAGATACCCAAACG…	VVMAVRFLFNLTFASVVTVCVLGGGKWSYISLAQSPPEVILKGESKTPIATAQQYFNQGLKHYQQGNLTDFQAAQSSWEEALALWRQENNLPQIAVTLNFLCLVQRQLAPPTKALACYQELLTTAQALKDTQTEANGLVAIAQLQLQQGNYQEAFESLEKSLPLWQQANFKTGEVISQNELGQMYLTLGATTQAEYFYNKALAQAQSLGNRGNIAGIEHNLAQVKLASGDLKGALALEENAFQHWQGLIHDLGDRATPDLVRGQAAGLNNLAFMQVQNQQLNLAQENYQKALIIWQRLGDKNGEASSLNNLGYLAFLQGDLPTALDYYQRALILRQTTGDRLKESLTRYWLAVAWKQQGEVQQAMAEIEEAIYLLENLRQAIGNEDLRASFLASKQDYY…	unknown protein	unknown protein
NC_000911.1:2647386-2650184:-	NC_000911.1	HRIBO	CDS	2647386	2650184	-	sll0616	SGL_RS14240	secA	2799	933	Yes	0.635015	4.26142	2.44822	0.498264	1.18671	0.842486	100.58	278.91	158.39	65.45	158.39	65.45	78.92	77.67	ATG	TAA	CCTATCCCAAGTCCC	ATGTTAAAAGCCCTCTTTGGTGATCCCAATACCCGCAAACTGAAAAAGTTTCAACCCTACGTGGCGGAGGTCAACCTCTACGAAGAGGACATTGAAAAGCTGTCTGACGATGAGTTGAAGTATAAAACCGTCGAATTTCGGGAAGCGTTGGATAAGGCCCGCAGCGATGCGGAAACAGAAGAAATCCTAGACGAAATTTTGCCAGAAGCCTTTGCCGTGGTGCGGGAAGCGGGGAAACGGGTGTTGGGTATGCGTCACTTTGACGTGCAACTGTTGGGGGGCATTATTCTCCACAAAGGGCAAATTGCGGAAATGAAAACTGGGGAAGGAAAAACCCTGGTGGCCACTCTACCTTCCTATCTGAACGGTTTAACGGGCAAAGGGGTCCATGTGGTGACG…	MLKALFGDPNTRKLKKFQPYVAEVNLYEEDIEKLSDDELKYKTVEFREALDKARSDAETEEILDEILPEAFAVVREAGKRVLGMRHFDVQLLGGIILHKGQIAEMKTGEGKTLVATLPSYLNGLTGKGVHVVTVNDYLARRDAEWMGQIHRFLGLTVGLVQSGMNPEERKKNYACDITYTTNSELGFDYLRDNMSTAMIEVVQRPFNFCIIDEVDSILIDEARTPLIISGQVERPTEKYLQASDIAAQLEPEIHYEVDEKQRNVLMTDEGFEKAEQLLQTTDLFDKNDPWAHYIFNAIKAKELFLKDVNYIVRNGEVVIVDEFTGRIMVGRRWSDGLHQAIEAKERVEIQKESQTLATITYQNFFLLYPKLSGMTGTAKTEETELEKVYNLQVTITPTN…	preprotein translocase SecA subunit	preprotein translocase SecA subunit
NC_000911.1:1528472-1531261:-	NC_000911.1	HRIBO	CDS	1528472	1531261	-	sll0242			2790	930	Yes	0.480591	2.74562	1.61311	0.229958	2.03501	1.13248	11.39	23.53	23.7	8.57	23.7	8.57	5.45	17.44	ATG	TGA	AGGAGACAAGTAACC	ATGGACTTTGTCGAAGCCGAGCAAATGTATTATGATTGGTGTCAGCAGTTGCATGAGCGTCATATTTCAGCAACAGAATTTACTGCTTGGTTAGACCGTCTTCGGGTGCAGGATGCCCAGGGGAACTGGTGGCACATTGAACATCCCGGTGGTATGTGGCTCTGTTGGAATGGCCAAGCTTGGGAACGCAAGAATCCACCTAAAGAAGCAACCGATTCACCGCCAGGAACAGCATTAACCCAACAAATGAAAGAACCCCAAAACTTGGGACAACTCCTCGGCTGGCTCGCCGGTTCGGTACTCAAAGGAATTCCCAAGCAAATAGTTTTAGGAATTTTTCTCATTGTTATTGTTTGGCTGCTTCATCTTTTTCTACTCGTTGTCGTCAATGACGGGTTT…	MDFVEAEQMYYDWCQQLHERHISATEFTAWLDRLRVQDAQGNWWHIEHPGGMWLCWNGQAWERKNPPKEATDSPPGTALTQQMKEPQNLGQLLGWLAGSVLKGIPKQIVLGIFLIVIVWLLHLFLLVVVNDGFNLTGTNPWFDSVLVLGGEVIAGSLFWIFTGILLSQLIHGTLGQYLKAITSFPATVVSFCQQSSQFKAPILWLGFSGALVFALLFGNLLVSLQILLFTLVALQESTHFLRLVLKLSWQDAQKLIRKGKSLHPLTSDQCQQLLSGMAVGFGLAALLLWLAPSLLRLFFIAAIAVTLWQFFSGKRSTTSALSLFIIFTAGSLTLGQMEPVWADDGGWAECGQSLQTWIQCGGTDQAILNSGLAGLAIWLGWILGGLQIPSASMASSGVI…	unknown protein	unknown protein
NC_000911.1:684560-687334:-	NC_000911.1	HRIBO	CDS	684560	687334	-	sll1296	SGL_RS05075	hik39	2775	925	Yes	0.393934	5.70017	3.04705	0.0518886	0.270354	0.161121	41.3	203.04	104.84	35.62	104.84	35.62	5.44	9.63	ATG	TAA	GAATTTGGTCAACGT	ATGTTTGATGCCGCCACCCTCGCCGCCATTACCGCCGAAGCCCGTCAGGCCTTTTTGGAGGAAGACGCGCCGGAATGTCTAGCACAGTTGACAGTGGGTTTCCAGTCCTTGGAACGGGTGTTAGGCCCCGCTGGGGATTCCCAACAACGGCAAAAGCTGATTCAGGATATGGGACGGGCGGCCCATTCCCTCAAGGGGGGAGCGGGAATGTCGGCTTTAACCCCTCTGCAGACCCTCTGTCACCGGTTGGAGGATTTATTTGAGGCTCTAGAACAGGGAAGGGTGGAAGATAAATCCATGGCAGTGGGTTTGATTGCCATGACCATCGAGGAAACCCAGGCCATGGTGGAGTTGGCCAACAGTGGTCGTTTACAGGACACGGATGAGCCGCCGGAACTT…	MFDAATLAAITAEARQAFLEEDAPECLAQLTVGFQSLERVLGPAGDSQQRQKLIQDMGRAAHSLKGGAGMSALTPLQTLCHRLEDLFEALEQGRVEDKSMAVGLIAMTIEETQAMVELANSGRLQDTDEPPELALALGEFLETCQPQPSQEEAIAGDVSQFVRTSLTVELEACLERVERRLERGGTATELRESFSLLLEECTLLGQALSCDWLEEAGNRWRGELVRPQVDLLTLLPTAIAELRSLREQFLAGELTPPAPEIVAEPDPEPLPEVKPVTAVIAPPVPGVPIPAVVTAKASPAPSTRQTLRIPLDRLNKLSNTVSELLINQERLLEYDKQLRQASRNLKRRGQQLIPMREQVESLYDELSFSDQTKISPSNGGGNQNGDSQSSLGIAGLVDF…	two-component hybrid sensor and regulator	two-component hybrid sensor and regulator
NC_000911.1:576934-579696:-	NC_000911.1	HRIBO	CDS	576934	579696	-	sll1941	SGL_RS04580	gyrA	2763	921	Yes	0.248582	2.37295	1.31077	0.116039	0.967213	0.541626	4.82	23.16	19.39	9.76	19.39	9.76	2.25	9.44	ATG	TAA	CAGGTTCCCAGCGGC	ATGGCCAGAAAATCTTTCCCCAGCGGTCAAATTATCCCCACCGATCTCCACGAAGAAATGGAACGTTCCTACCTGGAATATGCCATGAGTGTGATTGTGGGGCGGGCATTACCCGATGTGCGGGACGGTCTAAAACCGGTGCATCGTCGCATTCTCTACGCCATGTACGAGTTGGGGCTGACCCCCGATCGCCCGTTTCGGAAATGTGCCCGGGTGGTGGGGGACGTGTTGGGCAAATACCATCCCCACGGTGACCAGTCTGTGTACGATGCCCTGGTGCGGATGGTGCAGGATTTTTCCAGTCGTTATCCCCTCCTGGCTGGCCATGGCAACTTCGGTTCCGTGGACAATGATCCTCCGGCCGCCATGCGTTACACCGAAACCCGCTTAGCACCCATC…	MARKSFPSGQIIPTDLHEEMERSYLEYAMSVIVGRALPDVRDGLKPVHRRILYAMYELGLTPDRPFRKCARVVGDVLGKYHPHGDQSVYDALVRMVQDFSSRYPLLAGHGNFGSVDNDPPAAMRYTETRLAPIAMGAMLEGISEAIVDFTGNFDNSQEEPTVVPAQLPLLLLNGCSGIAVGMATSIPPHNLGEVVDGLIGLINKPDLSDQELFKLIPGPDFPTGGHILDSEGILQAYQTGRGLIPVRGVSHIETIRGEKKRSHNRTAIVITELPFQVNKAAWIEKIASLVNDGKLDGISDLRDESDRTGMRVVIELKRDAEPNAILQKLYRMTPLQSNFGVIFLALVNNQPVQMSLRQILQEFLQFREDTLLRQYENELGENRRRLELLTGLLIGLENL…	DNA gyrase A subunit	DNA gyrase A subunit
NC_000911.1:1372455-1375193:-	NC_000911.1	HRIBO	CDS	1372455	1375193	-	sll1165		mutS	2739	913	Yes	0.514594	2.51763	1.51611	0.478671	2.94606	1.71236	11.46	24.27	22.27	9.64	22.27	9.64	10.66	28.4	ATG	TAG	ACTATATTTTTTCCT	ATGGATTGCCGACTTAAGTGCACTAATCAATGCACTAGTTTGATGATGGCTTTCGATAAATCTCATACAATTAAAGGCTGCTCCACAGAATTTTCCCTTTCCATGACTGATACTCCGATCCTCGGCACTGTTAAAGAACCCCAACGGGACTATCGCACCCTCGATCGCCAGAAGTTGACGCCGATGTTCCAGCACTACACGGAGGTTAAGGAACAGTATCAAGGGGCTTTGTTGCTTTACCGGGTGGGGGACTTTTTTGAGTGTTTTTTCCAGGATGCGGTGATCATTGCTAGGGAATTGGAACTGATTTTAACTAGCAAAGAGGGGGGCAAGGAAATCGGCCGGGTGGCCATGACTGGGGTACCCCACCACGCCTTGGATCGCTATGCGCGGCAGTTG…	MDCRLKCTNQCTSLMMAFDKSHTIKGCSTEFSLSMTDTPILGTVKEPQRDYRTLDRQKLTPMFQHYTEVKEQYQGALLLYRVGDFFECFFQDAVIIARELELILTSKEGGKEIGRVAMTGVPHHALDRYARQLVEKGYAVAICDQVEDAAEAQAEKRMVERQVTKLLTPGTLTDDSMLPAKRNNFLAAIAMVEDKWGLAHADISTGEFFTCQSSNLDDLAVELLRLQPSEVLIPTSAPDIRNILRPGEPSEHIPKQLPTSFCYSLRSQAPFSLVEAKQRLLTTFRVKSLEGMGCEGLPLAIRAAGGLLEYIEDTQKAHVVPIQPLKTYGLTDFLVLDHQTRRNLEINQTVRDGSFHGSLLWALDRTSTTMGSRALRRWLLQPLLDLKGIQARQDTIQEL…	DNA mismatch repair protein	DNA mismatch repair protein
NC_000911.1:3264290-3267022:+	NC_000911.1	HRIBO	CDS	3264290	3267022	+	slr0557	SGL_RS16980	valS	2733	911	Yes	0.338467	2.84661	1.59254	0.202582	1.01107	0.606827	29.89	105.41	88.31	37.03	88.31	37.03	17.89	37.44	ATG	TAA	AGTAAACTCCCTCCC	ATGACCACTTCCCTGCCGCCCCAATATGAACCCACCGTCACCGAAGCCAAATGGCAAACAGCGTGGGAAGAAAGTCATGCCTTTAAAGCCGATCCCGATCGCCCAGGGGAACCCTATTGCGTGGTGATTCCGCCCCCCAATGTGACAGGTAGTTTGCATATGGGCCACGCTTTTGAGAGTTCTTTAATAGATACTTTGGTTCGTTATCACCGCATGCGGGGGGACAATACCCTCTGGTTACCGGGAACGGACCATGCCAGTATTGCTGTGCAAACCATTTTGGAACGTCAGTTAAAAGCGGAGGGGAAAACGAGGGATGATTTGGGCCGGGAAAAGTTTTTGGAACGGGCCTGGCAATGGAAAGCGGAGTCCGGCAGTACTATTGTTAACCAACTGCGG…	MTTSLPPQYEPTVTEAKWQTAWEESHAFKADPDRPGEPYCVVIPPPNVTGSLHMGHAFESSLIDTLVRYHRMRGDNTLWLPGTDHASIAVQTILERQLKAEGKTRDDLGREKFLERAWQWKAESGSTIVNQLRRLGVSVDWTRERFTMDEGLSQAVKTAFIKLYEEGLIYRGNYLVNWCPASQSAVSDLEVENQEVDGHLWYFRYPLTDGSGELVVATTRPETMLGDTGVAVNPHDERYAAMVGKTITLPLVNREIPIVADELVDPEFGTGCVKVTPAHDPNDFVMGQRHNLPFINLLNKDGSLNENGGDFAGQDRFEARKNVVQALEAQGFLVKIEPYRHSVPYGDRGKVPVEPLLSTQWFVKIESLAQNALACLDEDNSPNFVPERWGKVYRDWLVK…	valyl-tRNA synthetase	valyl-tRNA synthetase
NC_000911.1:1457213-1459930:-	NC_000911.1	HRIBO	CDS	1457213	1459930	-	sll1614	SGL_RS08700	pma1	2718	906	Yes	0.778583	1.58193	1.18026	0.727858	1.60949	1.16868	9.67	10.33	12.42	6.53	12.42	6.53	9.04	10.51	ATG	TAA	TGCCCCCAAATCAGT	ATGGATTTCCCCACCTTAAGTTCTTACCTCCATCACCATCGACCAGGGGAAGACATTCTTGCAGATTTGCACACCGATCCAGGTTTAGGTCTGACAGCGGAGGCGGTGGCCCAGCGTTACGAACAATATGGCCGCAACGAATTGAAATTTAAACCGGGCAAACCAGCTTGGTTGCGTTTTCTGCTGCAATTTCACCAACCTCTGCTCTACATTCTGCTCATTGCTGGTACGGTTAAGGCTTTTCTCGGCTCCTGGACCAACGCCTGGGTTATTTGGGGAGTTACCCTAGTCAACGCCATCATTGGTTACATCCAAGAAGCGAAAGCAGAAGGGGCGATCGCCTCCTTGGCCAAGGCAGTAACAACAGAAGCCACAGTGTTGAGAGATGGGCAAAATCTA…	MDFPTLSSYLHHHRPGEDILADLHTDPGLGLTAEAVAQRYEQYGRNELKFKPGKPAWLRFLLQFHQPLLYILLIAGTVKAFLGSWTNAWVIWGVTLVNAIIGYIQEAKAEGAIASLAKAVTTEATVLRDGQNLRIPSQDLVIGDIVSLASGDKVPADLRLLKVRNLQVDESALTGEAVPVEKAVELLPEETPLAERLNMAYAGSFVTFGQGTGVVVATANATEMGQISQSMEKQVSLMTPLTRKFAKFSHTLLYVIVTLAAFTFAVGWGRGGSPLEMFEAAVALAVSAIPEGLPAVVTVTLAIGVNRMAKRNAIIRKLPAVEALGSATVVCSDKTGTLTENQMTVQAVYAGGKHYEVSGGGYSPKGEFWQVMGEEVDNVLLDGLPPVLEECLLTGMLCN…	cation-transporting P-type ATPase	cation-transporting P-type ATPase
NC_000911.1:2216476-2219175:-	NC_000911.1	HRIBO	CDS	2216476	2219175	-	sll1864	SGL_RS12280		2700	900	Yes	0.249821	1.62976	0.939792	0.284637	0.961887	0.623262	6.96	17.96	27.86	11.02	27.86	11.02	7.93	10.6	ATG	TAA	AATTCTCTTCTCTCC	ATGGCTTGGTTTCCCTTTTGGCAACGGTGGCAACAATGGTTGCGCTCTCGACACTATGGCCGCACTGCCATCGATAGCCGTTATGCGATCGCCGAAGCCTGTGTGATCGGATTTGTTTCTGCCCTAGCGGCCTTAGTAATTAAAAACGGAGTCAACTGGTTAGGGTCCAGCCGTTTGAGTCTGGCGGATACCTATGGGGCCATTTGGGTGCTGCCCTGTTTTGGCTTGGTGTTTGGGGGTTTGGCGGGGGCATTAATTGAACAATTTTCCCGACCGGCGGGGGGCGGTGGCATTCCCCAGGTGAAAGCGGCCCTGGCTCGGTATCCTATTCCCCTAGATTGGCGGGTGGCGGTGGTCAAGCTGTTGGGAACAGTGCTAGTGCTGGGGGGAGGCATGACC…	MAWFPFWQRWQQWLRSRHYGRTAIDSRYAIAEACVIGFVSALAALVIKNGVNWLGSSRLSLADTYGAIWVLPCFGLVFGGLAGALIEQFSRPAGGGGIPQVKAALARYPIPLDWRVAVVKLLGTVLVLGGGMTLGRRAPTVHIGAALAAQLSRWFPTSPEHRRQMIAAGAAAGLAAGFTTPIAGVLFVVEELMRDVSSLTLETAIVASFVGAVTSLVFQSSDLNLAHSLSNSPTVRFTTGEIPFYLLLGILAGILGVLLNRSILSLQNWQRKQNLSLVIRIGVVGLISGVAIALLPSFFRDNAGLREFVTSGELSWHQVVLTLVAHFILTILAYSTDAPGGLFAPALVMGSALGYLVGEFGSYWQDQVTQTTFALAGMGAFFTSVVRVPVTAIIIVFEL…	probable chloride channel protein	probable chloride channel protein
NC_000911.1:1414126-1416822:+	NC_000911.1	HRIBO	CDS	1414126	1416822	+	slr2058	SGL_RS08530	topA	2697	899	Yes	0.499548	5.49808	2.99881	0.101492	0.982692	0.542092	22.1	114.36	44.24	20.8	44.24	20.8	4.49	20.44	ATG	TAA	CGTTTCCCCTTCCCT	ATGTCCAAACTCGTTATCGTTGAATCCCCCACTAAAGCCCGCACTATCCGCAACTATCTGCCCCAGGATTATCGGGTGGAAGCTTCCATGGGCCATGTCCGGGATTTACCGGCTTCGGCGGAGGAAGTACCCGCGGCTTACAAAGATAAAAGTTGGGCTAATTTGGGAGTCAATGTGGAAGACCATTTCAGTCCCCTTTATGTGATTCCCAAAAGCAAAAAGAAAGTAGTTAAGGAATTGCAAACTGCCCTGAAAAATGCCGACGAAGTAATTCTGGCCACGGACGAAGACCGGGAAGGAGAAAGTATTAGCTGGCATTTGTTGCAACTGCTCCAGCCCAAAGTGCCCATTAAACGGATGGTGTTCCACGAAATTACCCAGGAAGCCATTCGCAGTGCG…	MSKLVIVESPTKARTIRNYLPQDYRVEASMGHVRDLPASAEEVPAAYKDKSWANLGVNVEDHFSPLYVIPKSKKKVVKELQTALKNADEVILATDEDREGESISWHLLQLLQPKVPIKRMVFHEITQEAIRSALENCRDIDENLVHAQETRRILDRLVGYTLSPLLWKKIAWGLSAGRVQSVAVRLIVQRERARRAFKTAGYWDLKAELEQNKNPFQAKLMTLGGTKLANGSDFDPNTGALLPDKQVVVLDEAQAIALKERLTGKPWAVVNTEEKPGVRKPSPPFTTSTLQQEANRKLGISARDTMRVAQKLYEEGYITYMRTDSVHLSDQAVTAARNCVQQMYGKEYLSPQPKQYTTKSKGAQEAHEAIRPAGTEFRIPNQTGLKDRELALYELIWKR…	DNA topoisomerase I	DNA topoisomerase I
NC_000911.1:2194405-2197101:+	NC_000911.1	HRIBO	CDS	2194405	2197101	+	slr0156	SGL_RS12190	clpB2	2697	899	Yes	0.434588	2.11051	1.27255	0.20378	0.93399	0.568885	26.21	70.66	60.31	33.48	60.31	33.48	12.29	31.27	ATG	TAA	CTCAAGCTAGTCTGA	ATGCAACCTACTGATCCAACCAAATTTACTGAACAAGCCTGGGACGCCATTGTTAAATCCCAAGAAGTAGCCCGTCGTTATAAGAACACAAATTTGGAAGTAGAGCATATTCTGCTGGCGTTGTTGGAGCAGGATATGGGTTTGGCGGCAAGGATTTTCCAGCGGGCGGCGGTGGATGGCGAGGGACTACGGCAACAGTTGGAAATTTTCACCAACCGGCAACCCAAGCAGGCTTATGTAGAACAACTTTACCTGGGGCGTAGTTTGGATGTGATGCTAGACCGGGCCGATGCCGCCCGTAGTAGCTGGGAAGATAAATTCATTTCCGTTGAACATTTACTGGTGGGGTTTGCAGAGGACGACCGGGTGGGGCGCAAAACCCTCCGCGCGTTTAACCTT…	MQPTDPTKFTEQAWDAIVKSQEVARRYKNTNLEVEHILLALLEQDMGLAARIFQRAAVDGEGLRQQLEIFTNRQPKQAYVEQLYLGRSLDVMLDRADAARSSWEDKFISVEHLLVGFAEDDRVGRKTLRAFNLDPQDLELAIKAIRGSQKVTEPNQEEKYEALDKYGRDLTEQARQGKLDPVIGRDEEIRRVIQVLSRRSKNNPVLIGEPGVGKTAIAEGLAQRIINGDVPESLKNRQLISLDMGSLIAGAKYRGEFEERLRSVMKEVTNSDGQIILFIDEVHTVVGAGGREGSGSMDAGNLLKPMLARGELRCIGATTLDEYRKNIEKDPALERRFQQVYVKQPSVDDTISILRGLKEKYEVHHGVKITDSALVAAATLSHRYIQDRFLPDKAIDLVD…	ClpB protein	ClpB protein
NC_000911.1:3561946-3564639:+	NC_000911.1	HRIBO	CDS	3561946	3564639	+	slr0603	SGL_RS18345	dnaE	2694	898	Yes	0.617639	4.62421	2.62093	0.203103	1.08648	0.64479	21.5	58.82	34.81	12.72	34.81	12.72	7.07	13.82	ATG	TAA	GTTATATTTCTAGCC	ATGTCCTTCGTCGGTCTCCATATCCACAGCGACTATAGCCTCCTGGATGGGGCTTCCCAATTACCCGCCTTGATTGACCGGGCCATTGAACTGGGTATGCCGGCGATCGCCCTGACGGACCATGGGGTGATGTATGGGGCGGTGGAATTGCTGAAAGTCTGCCGGGGCAAACCGATTAAACCCATCATTGGCAATGAAATGTATGTGATAAATGGTGACATTGAAATTAATAAGCGTCACCGTCGTTTCCACCAGGTAGTTTTAGCGAAGAATAATCAGGGTTACAGAAATTTAGTTAAACTCACCACCATTTCTAACTTGAAAGGTATTCAAGGCAGCGGCATTTTTGCTCGACCTTGTATTAACAAAGAGCTGCTAGAACAATACAAAGAAGGGTTG…	MSFVGLHIHSDYSLLDGASQLPALIDRAIELGMPAIALTDHGVMYGAVELLKVCRGKPIKPIIGNEMYVINGDIEINKRHRRFHQVVLAKNNQGYRNLVKLTTISNLKGIQGSGIFARPCINKELLEQYKEGLIVTSACLGGEVPQAILKGDLDHARQVAKWYKNLFGDDYYLEIQDHGSVEDRLVNINLVKIAQELDIKIVATNDSHFISCNDVEAHDALLCIQTGKLITEEKRLRYSGTEYLKSAEEMHLLFRDHLPDDIIETAIANTLEVADKVEAYSILGEPRIPHYPIPPNHTPETYVEDIAWDGLLERLKCRERADITPVYKERLEYELRMLEKMGFCTYFLVVWDYIKYARDHGIPVGPGRGSAAGSLVAYCMKITNIDPVHHGLIFERFLN…	DNA polymerase III alpha subunit [Contains: Ssp dnaE intein]	DNA polymerase III alpha subunit [Contains: Ssp dn aE intein]
NC_000911.1:2292188-2294878:+	NC_000911.1	HRIBO	CDS	2292188	2294878	+	slr0335	SGL_RS12650	apcE	2691	897	Yes	2.00741	8.73185	5.36963	0.476092	1.78436	1.13022	233	1042.67	116.07	119.41	116.07	119.41	55.26	213.07	ATG	TAG	AGATAATGAAATCCA	ATGAGTGTTAAGGCAAGTGGTGGCAGCTCACTAGCGCGACCCCAACTCTACCAAACCGTTCCCGTCTCCGCTATCAGCCAAGCAGAGCAACAGGATCGCTTCCTAGAAGGGTCAGAACTAAACGAGTTAACAGCGTATTTTCAGTCCGGTGCCCTGCGTCTAGAGATTGCAGAGACCCTAACCCAAAATGCCGACTTGATCGTCTCTAGGGCCGCCAATCGAATTTTCACCGGCGGTTCCCCCCTCTCCTACCTGGAAAAGCCCGTTGAGCGTCAACCTGCATTGGTGGGTGCCTCCAGTGATAGTCGCAATGGCAGTGTTACCTATGCCGAAAGCAATGGAAGCGGTGGTCTCTTTGGGGGACTCCGTTCTGTTTTTAGCAGTACTGGCCCCATTCCC…	MSVKASGGSSLARPQLYQTVPVSAISQAEQQDRFLEGSELNELTAYFQSGALRLEIAETLTQNADLIVSRAANRIFTGGSPLSYLEKPVERQPALVGASSDSRNGSVTYAESNGSGGLFGGLRSVFSSTGPIPPGFRPINIARYGPSNMQKSLRDMSWFLRYTTYAIVAGDPNIIVVNTRGLKEVIENACSIDATIVAIQEMRAASADYFRNNAQAKEIVLQYFDILLSEFKAPTPANKVRQGPSNDIQGLELPQSYFNAAAKRQKYAMKPGLSALEKNAVIKAAYRQIFERDITKAYSQSISYLESQVRNGDISMKEFVRRLAKSPLYRKQFFEPFINSRALELAFRHILGRGPSSREEVQKYFSIVSSGGLPALVDALVDSQEYADYFGEETVPYLR…	phycobilisome core-membrane linker polypeptide	phycobilisome core-membrane linker polypeptide
NC_000911.1:2490326-2493004:+	NC_000911.1	HRIBO	CDS	2490326	2493004	+	slr0019	SGL_RS13475		2679	893	Yes	0.341119	0.886525	0.613822	0.287105	2.33245	1.30978	7.01	10	20.55	11.28	20.55	11.28	5.9	26.31	ATG	TAA	TCCTAATCTAGGTCA	ATGGTGTTTCGATTCCCCTCGCCAGTACTAGTAATTATTTTGGCTAACTGCCTGATGACCGTCGTCGGGCTAATCCTACCCCAGTCAGCTAGAACAGAAACTTTTAGTGCTGATTTTCCCCCTCCCGATTCTGCCTTGGATTTGTTGCTGGGACAGGAAACTCCCTTAATGGAAACGACAATTCCAGAGCCGGAACAAGGGCAGGAGGATAACCAAAGCGCCCCGCCCTCTGAGCCAACACCGGGCAATTTGGGTAATGAAGACGATTTATTTGAGCGGGTATTCGGTCGGCCCCGCCCCACGGGGGTACAGCGTTTGGTGGCGCCCTTTTTCATCAACGATTTGCAACAGGGTCAAATTGTAGTGTTTGTTTCCCTGGGAGGGGGTAGTAGCCTACAA…	MVFRFPSPVLVIILANCLMTVVGLILPQSARTETFSADFPPPDSALDLLLGQETPLMETTIPEPEQGQEDNQSAPPSEPTPGNLGNEDDLFERVFGRPRPTGVQRLVAPFFINDLQQGQIVVFVSLGGGSSLQITASTLLLKMEEYARPDIQTRLADLVDDSGNLTLAALQSVGLDATFNDQLLELRIIIPPNLRKTIVYGSGNLQLPPGAATALRPSNFSGFINLIGTQPYAWDGTGDLGRQALNLGVEGALNYQGWVLEGSASFAEQSNNPWTRSDIRLVKDDPDNAVRYVLGDLFSTARSYQSFVPMVGFAMFRNFSLQPYLTTRPTGQFEFLLESPARVEIFVNGLLRQTLQLPAGPQDIRNFGLNTGLNNVTVKIIDSAGRVEELSFSAPLATD…	unknown protein	unknown protein
NC_000911.1:3504297-3506969:+	NC_000911.1	HRIBO	CDS	3504297	3506969	+	slr0454	SGL_RS18035		2673	891	Yes	0.145833	1.12388	0.634854	0.27954	1.78062	1.03008	4.69	16.24	32.16	14.45	32.16	14.45	8.99	25.73	ATG	TGA	TTAGGAATTCCCTCG	ATGCAGTCCCCCCGTGCTCCCCGCTGGAATCTTTCCCATTGGGCCATTGACCATCCCCGTTTTACCATCGGTTTTTGGTTGGCGATCGCCGTGGCGGGGCTATTGACTTTTAGTTCCCTCAAATATGCCCTCTTTCCGGAAGTGAGCTTTCCGGTGGTGATTGTCCAGAGCAGTGGTGCGGGGTTGGATTTGGCCCAAACGGAGCAGAAGTTAACCATTCCCCTGGAAGAAAAACTAGTTACCATTGCCGATGCGGACGTGCAATCTTCCACCTACCCGGGGCAAACGGTGGCATCGGTGATTTTTTTAATGGGCCAATCCCTGGAACAGGCCACCACGGCGGTGGAACAATCTTTACAGGGAGTAACTCTACCAGCGGGCAGCGAAATTACCGTTGCT…	MQSPRAPRWNLSHWAIDHPRFTIGFWLAIAVAGLLTFSSLKYALFPEVSFPVVIVQSSGAGLDLAQTEQKLTIPLEEKLVTIADADVQSSTYPGQTVASVIFLMGQSLEQATTAVEQSLQGVTLPAGSEITVAPYNLNESVAVTYAVASETLSLEEMAAPLQQELMPQLQNIAGVLRVDLLGDANFRSPGVKALAQQTINPPTLTRHNGQDVLAVQVVKTAQANTLEVVDRVEQLIVEQAPKFPQLKFIEAETTAGYIREATQATIEALLGAIVLAVLIIYPFLRSGWATLISAIAIPLSLLGTFIVMAALDFNLETLTLLALALIIGIVVDDAIVDVENIARHVEAGEPPKRAAKIGTEEIGLTVSATTFSIVVVFLPIALLGGTLGEFFFPFAVTVS…	RND multidrug efflux transporter	RND multidrug efflux transporter
NC_000911.1:1949613-1952270:+	NC_000911.1	HRIBO	CDS	1949613	1952270	+	slr1670	SGL_RS11090	gghA	2658	886	Yes	0.412587	2.50309	1.45784	0.279085	0.940329	0.609707	6.49	24.33	15.73	9.72	15.73	9.72	4.39	9.14	ATG	TAG	AGCTTATTTTTCAGT	ATGAAAACATTGAATCGTATCCATCTGGTCGAAGAAGAAACAGAAAAACTAATGGCTTGGGCCCGGAGTGTCACGGAATCGCCGGAGAACTATTTCCAAGCGGCCCGGGAAGTGGTGAAAAAATTGGGGGGCCATTACCAAGGGGATGGCCTAACCCAAGTGGGATTTTGGGTGCCCCGGTTAGCGGGGGAAGGGGCTTTTACTGAAAAGTTAATTTACCTAGAGGTGTTTACGCCCCTGGGGGAGATTGATTTCCAAGCGCCGGAACAAACTGGCTTGTTTCGTTGGGAAAGGATTGAATTGCCGCAACAGGGGGAATTTGTTTGGGCTGTGCTGTCGGGGATGCGGCCAGGCACCAGAGATCAAGCTGGTTCTTTCTATTGGTTGCGCTATTACGAT…	MKTLNRIHLVEEETEKLMAWARSVTESPENYFQAAREVVKKLGGHYQGDGLTQVGFWVPRLAGEGAFTEKLIYLEVFTPLGEIDFQAPEQTGLFRWERIELPQQGEFVWAVLSGMRPGTRDQAGSFYWLRYYDSILSNTLVIRDPLTYSLPYGVFAPAELYDVEKMQRERADLDYLRRSAALNHCQENPENVFDPEQLKAQRAAVLNPAIPVDQNLHPDEDSEAAICRVGAMANILQIHINTASPEGTLVGLTKIYQRLGEKILRHEPLSDAEQNYLGYDAIQLLPIEPTIEYRLEDFNQDHEFFSIAGEEVEEIEVEEGAVVVEEKIKVTLRKPNTQNWGYDVPILGSGATNPAVLGTLRPDELVDLIATLHNFPSGPIQVIYDLVYGHADNQALELL…	unknown protein	unknown protein
NC_000911.1:3075896-3078550:-	NC_000911.1	HRIBO	CDS	3075896	3078550	-	sll0779	SGL_RS16175		2655	885	Yes	0.518278	2.76528	1.64178	0.251179	1.75908	1.00513	8.79	31.22	16.96	11.29	16.96	11.29	4.26	19.86	ATG	TAA	GACTGACTGCTAGTT	ATGGCAATTTCCGCACAAAGTTTCATTAATGTTGCCAATGAAAGTTTAGTCTCCACGCTGGCGATCGCCGCCTTGGGATTAAGCCTGTTAGTGATCCTAAGTTTGGCCGTAATCCAGTCCATTAACCGCCCTCTCCGTCGCCTTCAACAGCAAACCCAGGCCCTGCAAAAAAGTGAAGAACGATTCCGCTTCGCCCTCGAATCAACCGATACAAGTTGGTGGGATTGGGATATCAAAACCAATGAGGTGGATTGGTCAGACACCTTTGATGCCATGGTGGGCCGCGCCCCCAACTCCTACCCCAAAAATATTGCTTCCTTCTTAAGTTTTCTCCATCCCGACGACGTAGAACCCACCCGGGCAAAGTTATACGATTCCTTAGAAAATGGGATTCCCTAT…	MAISAQSFINVANESLVSTLAIAALGLSLLVILSLAVIQSINRPLRRLQQQTQALQKSEERFRFALESTDTSWWDWDIKTNEVDWSDTFDAMVGRAPNSYPKNIASFLSFLHPDDVEPTRAKLYDSLENGIPYKTEFRFVHPDGTIRWIMARGMVQRDANGQALRMSGINLDITEQKLAEAALKENEATLRLALSAETANWWKWDIVNDQMYSAPSFHDLLGRHGDELPTTWADAIALIYPEDRAKVQTAVEATLNHDAPYRVEFRMIPPNGQMVWIADLAALERDETGRPIQLSGIMIDITERKQIEEALQKSGQRLRMTLESTSTNWWERDLITDQADWSEQSDHLLGYTPDSYEKNQDTFYKLVHPDDREHVQAGVNLAIATGEPYQGEFRLVQAD…	unknown protein	unknown protein
NC_000911.1:2141613-2144246:-	NC_000911.1	HRIBO	CDS	2141613	2144246	-	sll0362	SGL_RS11990	alaS	2634	878	Yes	0.536189	4.04182	2.28901	0.190547	2.18515	1.18785	25.41	86.01	47.39	21.28	47.39	21.28	9.03	46.5	ATG	TAG	AATCTTCAACTAGAC	ATGACCACTACCCCGCCCGTCCTCAGCGGTCCCGAAATTCGTCAACAGTTTTTAAACTTCTTTGCCGATCGCCAGCATCAAATTTTGCCCAGTGCGTCCCTGGTGCCGGAGGACCCCACCGTACTGTTGACCATTGCGGGGATGTTGCCGTTCAAGCCAATTTTTTTAGGACAAAAGTCGGCGGAATTTCCCCGGGCCACCACTTCCCAAAAATGCATCCGCACCAACGACATTGAAAACGTCGGCCGCACCGCCCGCCACCATACTTTCTTTGAAATGTTGGGCAACTTTAGCTTTGGGGATTACTTCAAATCCCAGGCGATCGCCTGGGCCTGGGAATTATCGACCCAAGTATTTAAACTGCCAGCGGAACGGTTAGTGGTCAGTGTGTTTGAAGAA…	MTTTPPVLSGPEIRQQFLNFFADRQHQILPSASLVPEDPTVLLTIAGMLPFKPIFLGQKSAEFPRATTSQKCIRTNDIENVGRTARHHTFFEMLGNFSFGDYFKSQAIAWAWELSTQVFKLPAERLVVSVFEEDDEAFAIWRDEIGIPAHRIQRMGADDNFWVSGPTGPCGPCSEIYYDFHPELGDEKLDLEDDSRFIEFYNLVFMQYNRDNAGNLTPLEKKNIDTGMGLERMAQILQKVPNNYETDLIFPIIQTAANIAGIDYAQANEKTKVSLKVIGDHVRSVVHMIADGISASNLGRGYVLRRLIRRVVRHGRLLGINGEFTTKVAATAVQLAQPVYPNVLERQSLIEQELQREEAAFLKTLERGEKLLADLMADGVTEIAGADAFTLYDTFGFPL…	alanyl-tRNA synthetase	alanyl-tRNA synthetase
NC_000911.1:1448060-1450681:+	NC_000911.1	HRIBO	CDS	1448060	1450681	+	slr2002	SGL_RS08660	cphA	2622	874	Yes	0.53964	3.07979	1.80972	0.28652	0.543504	0.415012	134.91	307.24	250	99.76	250	99.76	71.63	54.22	ATG	TAA	TGACTGACACAGATC	ATGAAAATTCTTAAAACCCTTACCCTCCGCGGCCCTAACTACTGGAGCATTCGACGCAAGAAGTTAATTGTAATGCGCCTCGACCTGGAGGATTTGGCGGAGCGACCCTCCAACAGTATTCCTGGTTTTTATGAAGGGTTGATCAGGGTGTTGCCTTCTCTTGTAGAACATTTTTGCTCCCCAGGACACCGGGGCGGCTTTTTGGCAAGGGTGCGGGAGGGAACCTATATGGGCCATATAGTCGAGCATGTGGCCCTGGAATTACAGGAGTTGGTGGGGATGACGGCGGGGTTTGGTCGCACCAGAGAAACCTCCACCCCAGGCATTTATAACGTTGTTTATGAATACGTAGATGAACAGGCAGGACGTTACGCTGGCCGAGCCGCGGTGCGCTTGTGT…	MKILKTLTLRGPNYWSIRRKKLIVMRLDLEDLAERPSNSIPGFYEGLIRVLPSLVEHFCSPGHRGGFLARVREGTYMGHIVEHVALELQELVGMTAGFGRTRETSTPGIYNVVYEYVDEQAGRYAGRAAVRLCRSLVDTGDYSLTELEKDLEDLRDLGANSALGPSTETIVTEADARKIPWMLLSARAMVQLGYGVHQQRIQATLSSHSGILGVELACDKEGTKTILQDAGIPVPRGTTIQYFDDLEEAINDVGGYPVVIKPLDGNHGRGITINVRHWEEAIAAYDLAAEESKSRSIIVERYYEGSDHRVLVVNGKLVAVAERIPAHVTGDGTSTITELIDKTNQDPNRGDGHANILTKIVVNKTAIDVMERQGYNLDSVLPKDEVVYLRATANLSTGG…	cyanophycin synthetase	cyanophycin synthetase
NC_000911.1:2839957-2842575:+	NC_000911.1	HRIBO	CDS	2839957	2842575	+	slr0833	SGL_RS15120	dnaB	2619	873	Yes	0.315789	1.40708	0.861435	0.231736	1.47472	0.853226	8.04	22.26	25.46	15.82	25.46	15.82	5.9	23.33	ATG	TAG	AATCATTCCAACTTG	ATGGCTGCTAACCCTGCCCTGCCCCCCCAAAACATTGAAGCTGAAGAGTGCATCCTGGGGGGGATTCTCCTCGATCCAGAGGCCATGGGGCGCATCATTGACCTCCTGGTAGTAGACGCTTTTTACGTCAAGGCCCATCGTTTGATCTATGAGGCCATGCTTAGTCTCCATGGCCAAAGTCAGCCCACGGATTTGATGTCTGTCAGCAGTTGGCTCCAAGATCACCATCATTTCGAGGCGATCGGGGGCATGGTGAAATTAACTCAATTATTAGATCGCACCATTTCAGCGGTGAACATTGACCGTTTTGCCGCCCTAATCATGGATAAATATTTGCGTCGCCAATTAATTGCAGCGGGGCATGACATCGTTGATTTGGGTTACGAAACTAGCAAAGAA…	MAANPALPPQNIEAEECILGGILLDPEAMGRIIDLLVVDAFYVKAHRLIYEAMLSLHGQSQPTDLMSVSSWLQDHHHFEAIGGMVKLTQLLDRTISAVNIDRFAALIMDKYLRRQLIAAGHDIVDLGYETSKELETIFDESEQKIFRLTQSRPQAGLVPLSETLVNTFIELDKLHEKLSSPGVETQFYDLDAMTGGLQRADLIILAGRPSMGKTAFGLGIAANIAKNQNLPVAIFSLEMSKEQLALRLVASESLIDSNRLRTGHFSQAEFEPLTAAMGTLSSLPIYIDDTASISVTQMRSQVRRLQSEQKGPLGMVLIDYLQLMEGGSDNRVQELSKITRSLKGLAREINAPVIALSQLSRAVESRTNKRPMMSDLRESGCISGDSLISLASTGKRVSI…	replicative DNA helicase [Contains: Ssp dnaB in tein]	replicative DNA helicase [Contains: Ssp dnaB intei n]
NC_000911.1:2062905-2065523:+	NC_000911.1	HRIBO	CDS	2062905	2065523	+	slr1641	SGL_RS11615	clpB1	2619	873	Yes	1.29615	6.95578	4.12597	0.502495	3.23016	1.86633	36.37	114.84	28.06	16.51	28.06	16.51	14.1	53.33	ATG	TAG	AATATAGAAAATTTT	ATGCAACCCACAGATCCTAATAAATTTACGGAGAAAGCTTGGGAGGCGATCGCCAAAACACCGGAGATTGCTAAACAGCATCGACAACAGCAAATTGAGACGGAACACCTACTCAGTGCCCTACTAGAACAAAATGGTCTGGCCACCAGCATCTTTAATAAGGCTGGGGCGAGCATTCCCCGAGTTAACGATCAAGTTAATAGCTTTATTGCCCAACAGCCAAAATTAAGTAATCCGAGTGAATCGATTTATTTAGGCCGCAGTCTCGATAAATTGTTGGACAATGCGGAAATAGCCAAGTCTAAATATGGAGACGACTATATTTCCATCGAGCACTTGATGGCGGCTTACGGCCAAGATGACCGCCTGGGCAAAAACTTATATCGAGAAATTGGCCTA…	MQPTDPNKFTEKAWEAIAKTPEIAKQHRQQQIETEHLLSALLEQNGLATSIFNKAGASIPRVNDQVNSFIAQQPKLSNPSESIYLGRSLDKLLDNAEIAKSKYGDDYISIEHLMAAYGQDDRLGKNLYREIGLTENKLAEIIKQIRGTQKVTDQNPEGKYESLEKYGRDLTELAREGKLDPVIGRDEEVRRTIQILSRRTKNNPVLIGEPGVGKTAIAEGLAQRIINHDVPESLRDRKLISLDMGALIAGAKYRGEFEERLKAVLKEVTDSQGQIILFIDEIHTVVGAGATQGAMDAGNLLKPMLARGALRCIGATTLDEYRKYIEKDAALERRFQEVLVDEPNVLDTISILRGLKERYEVHHGVKIADSALVAAAMLSNRYISDRFLPDKAIDLVDEA…	ClpB protein	ClpB protein
NC_000911.1:3275314-3277923:-	NC_000911.1	HRIBO	CDS	3275314	3277923	-	sll1343	SGL_RS17040	ape2	2610	870	Yes	0.434159	4.5062	2.47018	0.205128	2.45911	1.33212	19.98	72.73	46.02	16.14	46.02	16.14	9.44	39.69	ATG	TAG	GGCGAAACTTTCCCC	ATGTCGTTTTTAACCTTTGATACCGAGTCCAACCAACGGAAAAGCTTTGAACTGCCCGGTGCTAAGCCCCACTACAATCCAGATCGCCCGGGGCAGGTAAATCATATTTTTTTGGACTTGAAAATCAACCTGGAGGAACGGCATTTACAGGGAGTTTGTCGCATCGCCCTCACGCCGGTGCGAGCTGGCATTGAGCAATTGACGTTGGACGCAGTGGACTTGAAAATTGCCTGGGTCTTAATTAAGGGGGTGAGCCAAAGCTTTGACTATGACGGGGAAAAATTAACCATCAACCCATTGCAACCCCTGGGAACGGAACCGGTCACCCTGGAAATTCAGTACGAATTGAAAAATCCCCGCCGGGGCATTTATTTTATCCAGCCCGATCGCCATTACCCC…	MSFLTFDTESNQRKSFELPGAKPHYNPDRPGQVNHIFLDLKINLEERHLQGVCRIALTPVRAGIEQLTLDAVDLKIAWVLIKGVSQSFDYDGEKLTINPLQPLGTEPVTLEIQYELKNPRRGIYFIQPDRHYPDKPVQVWTQGEDEDSRYWFPCFDYPGQLATSEIRVQVAKPHRVISNGSLIEQKDLGNEQIFHWSQSQIHPTYLMTLAIGDFAEIVDHYGDLPVRYYVEKGREADGQRSMGKTPRMIEFFNQTFGYPYAYPNYDQVCVADFIFGGMENTSTTLLMDRCLLDERAALDNRNTESLVAHELAHQWFGDLVVVKHWSHAWLKEGMASYAEVLWTDHEYGQDEAAYYLLGEARNYLAEDSSRYRRPIVTHVYREAIELYDRHLYEKGACVY…	aminopeptidase	aminopeptidase
NC_000911.1:806716-809325:-	NC_000911.1	HRIBO	CDS	806716	809325	-	sll1074	SGL_RS05615	leuS	2610	870	Yes	0.299121	2.27106	1.28509	0.0883318	1.09088	0.589608	22.79	85.46	76.19	37.63	76.19	37.63	6.73	41.05	GTG	TAG	GAGATCTTGGTCGTC	GTGGCATCCCCATACAACGCTGGTGAAATCGAGCAAAAATGGCAACAACGCTGGGCTGAATGGGGGTTGGACAAAACACCGATCGCCTCTGATCTGCCTAAATTTTATGCCCTGTCCATGTTTCCCTATCCTTCCGGGAACCTCCACATGGGCCATGTGCGCAACTACACCATCACCGATGTCATTGCTCGGTTAAAACGGATGCAGGGTTACCAGGTGTTGCATCCTATGGGTTGGGATGCCTTTGGTTTACCGGCGGAAAATGCAGCCATTGAGCGGGGTATTCCCCCCAAGCAGTGGACAGAAAAAAATATTGCCCAGATGCGAGCCCAGTTGCAACAGTTGGGGCTTTCCATCGATTGGGAACGGGAAGTGGCCACCTGTGCCCCCGATTATTAC…	VASPYNAGEIEQKWQQRWAEWGLDKTPIASDLPKFYALSMFPYPSGNLHMGHVRNYTITDVIARLKRMQGYQVLHPMGWDAFGLPAENAAIERGIPPKQWTEKNIAQMRAQLQQLGLSIDWEREVATCAPDYYRWTQWLFLEFFQAGLAYQKEATVNWDPIDQTVLANEQVDSEGRSWRSGAMVERKLLRQWFLKITDYAEALLNDLEQLTGWPERVKLMQSHWIGKSVGAYLEFPIKDSQEKIAVFTTRPDTVYGVTYVVLAPEHPLTKVVTTAEQQGTVDEFVAMVAKESEIERTAEDKPKRGVKTGGIAINPFNGEEIPILIADYVLYEYGTGAVMGVPAHDQRDFKFAQDNNLPMQVVIIPDDADNSDVNLTVAYTEAGVMVNSAQFTGMASPKA…	leucyl-tRNA synthetase	leucyl-tRNA synthetase
NC_000911.1:492130-494739:+	NC_000911.1	HRIBO	CDS	492130	494739	+	slr1044	SGL_RS04210	ctr1	2610	870	Yes	0.334047	3.73212	2.03308	0.0980255	0.792987	0.445506	76.47	266.1	228.92	71.3	228.92	71.3	22.44	56.54	ATG	TAG	GAGGAAACCGGCAAA	ATGGCAACAGAAACCAATTTTTCGCAGCTTTATGGGTTGGCCTACGCCGCCTATGGACAGGGGAATTATCAAGAAGCTTCTTCCCATATTGAACAATTGGCCGCTGATTTTCCCGAAGATCCTAATGTATTGTTGCTCCGGGGGCATATCTATGTCGGCCTGGAACAATACGCCCTAGCCCACCAGGCTTATCAGGGGGTAATTCGGTTTTCCGATCGCCAAGACTTAATTGACTGCGCTAACCAGGCCCTAGGGCAAATCCAAGAAGAGGAACCAAGGGGCAACGGAGCCAAAGATTCCCTTGACCAGGATTGGCAAAGTGACATCGATGCCATTGACAATTCCATGGCCTGGGAAACAGGAGTGTTCACCGAAGAGGATTTCGGCGAGCCCACTTTG…	MATETNFSQLYGLAYAAYGQGNYQEASSHIEQLAADFPEDPNVLLLRGHIYVGLEQYALAHQAYQGVIRFSDRQDLIDCANQALGQIQEEEPRGNGAKDSLDQDWQSDIDAIDNSMAWETGVFTEEDFGEPTLGRAPSPTNPGMDHPFGRSSASFGTSGARSYEIENLDWSPEAFTDDLDSDDEQTMMPQTGESTFVVPPAFGEGIADFADLAADVSSAGIGGTDGAEYPPYQTWDGGDWSEALGLDDPEALAQAPTPTSGDYGAGNNLPSFDAFEEGVEDELSDFNLTDIAPELPDSSLFSQATNLDIGAVGRIDDTQGGDTVVHGGNAAPPGMATWLKPDGAATGDLSSATSPFNDRPTSEVDAGFLGWFTNASLFRKQIYMAIASGVFSGFAVLVL…	methyl-accepting chemotaxis protein, required f or the biogenesis of thick pilli	methyl-accepting chemotaxis protein, required for the biogenesis of thick pilli
NC_000911.1:3348690-3351296:+	NC_000911.1	HRIBO	CDS	3348690	3351296	+	slr0665	SGL_RS17360	acnB	2607	869	Yes	1.32053	10.7465	6.03353	0.295222	1.56796	0.931589	46.43	216.65	35.16	20.16	35.16	20.16	10.38	31.61	ATG	TAA	AGAGAGAACCATCCC	ATGTTGCAAGCCTACCGTCGCCACGTTGCCGATCGCCAAAAGTTAGGCATTCCCCCCCTGCCCCTCAACGCCCAGCAGACTACTGAACTATGTGAACTGCTAAAAAATCCCCCCGAAGCGGAAAAAGAGGAATTGATGATGTTATTGCGGGATCGGGTTCCCCCTGGGGTGGACGAGGCGGCCTATGTCAAAGCGGGTTTCCTCACGGCGATCGCCAAAGGCGAAGTAACCTGTCCATTAATCAGCGGCCAAGGGGCGGTGGACTTATTAGGAACCATGATCGGCGGATATAATGTTCAATCCTTGATCGAACTGCTCAAGTCAAAAGATACCAACATTGCCAGTGCGGCAGCCACAGCCCTGAGCAAAACCCTGTTAGTCTTTGATGCCTTTAATGAC…	MLQAYRRHVADRQKLGIPPLPLNAQQTTELCELLKNPPEAEKEELMMLLRDRVPPGVDEAAYVKAGFLTAIAKGEVTCPLISGQGAVDLLGTMIGGYNVQSLIELLKSKDTNIASAAATALSKTLLVFDAFNDVLHLSDTNGYAKQVIDAWAEGAWFINKPEVPERITVTVFKVPGETNTDDLSPAPHATTRPDIPLHALAMLEAKMPEGLGTIAELKQKGHPVAYVGDVVGTGSSRKSAINSVLWHIGTDIPFVPNKRAGGYILGGKIAPIFFNTAEDSGALPIECDVNQLNTGDVITIYPREGKITNKAGETITTFQLKPETILDEVRAGGRIPLLIGRALTDKTREALGLSPSPLFVRPTAPADTGKGFTLAQKMVGKACGVQGIRPGTSCEPIMT…	aconitate hydratase	aconitate hydratase
NC_000911.1:787809-790406:-	NC_000911.1	HRIBO	CDS	787809	790406	-	sll1084			2598	866	Yes	0.533136	3.46105	1.99709	0.122651	1.08655	0.604598	16.17	43.99	30.33	12.71	30.33	12.71	3.72	13.81	GTG	TAA	CTGCCCAACGCCAAA	GTGAAAACCATGCCAGTGCCCGTAGAAACCCTGATTAATGCCGAGATCCATAAGCCCGCCCGGTATCTAGGCAACGAATTGGGGACAGTGCACAAGGAATGGAAAAGTGCTACGGTGCGCTGGGTATTGACCTATCCCGAAGTTTATGAGCTGGGAGCCTCCAACCTGGGGCATATTTTGCTCTACAACATCATCAATGCCCAACCCAGGCAATTGTGCGATCGCACCTATCTCCCCGCCGCCGACTTGGCAACAAAACTGCGAGAAACAAATACGCCCTTATTCTCCTTGGAATCCCGTCGTTACTTACCAGAATTCGACATTTTAGGCTTTAGTTTGAGCTACGAATTGGGAGCCACTAATATTTTGGAAATGTTGGAATTGGCCCATATTCCCCTC…	VKTMPVPVETLINAEIHKPARYLGNELGTVHKEWKSATVRWVLTYPEVYELGASNLGHILLYNIINAQPRQLCDRTYLPAADLATKLRETNTPLFSLESRRYLPEFDILGFSLSYELGATNILEMLELAHIPLTWQERKEGDYPLIFAGGQTATSNPEPYADFFDFIALGDGEELLPEIGLVLEEGKLQGLSKENLLLDLAQVPGVYVPRFYDMANDGSVHPNRDDVPKRIMRRVATPIPAYSIGLVPLIETVHDRLTVEIRRGCTRGCRFCQPGMLTRPARDVEPEAVIDAIETGIRQTGYNEFSLLSLSCSDYLALPAVGLEIRNRLKNENIALTLPSQRVDRFDENIANILGGTRQGSLTFAPEAGTQRLRDVINKGLTNEELLRGIKTAVEQGWD…	hypothetical protein	hypothetical protein
NC_000911.1:25266-27857:-	NC_000911.1	HRIBO	CDS	25266	27857	-	sll1409		fhuA	2592	864	Yes	0.199601	0.640625	0.420113	0.702595	3.94141	2.322	1	1.64	5.01	2.56	5.01	2.56	3.52	10.09	GTG	TAA	ATTAATTATCAGTAA	GTGTGGGGAGCACAAAAAATGATCAAAATTTTGGAACAGACTTCGCTCGCCGTTTTGATTGGTTTGACGGCCTTACATTCTGGTGTTGCCCTAGGATCAGTAGGGGAAAGTAATTTATCTGAAAAAGAAAAATTAGAAGATCAGGAGTTACAGAATGAATATAAGGCAAATGTAAAGATAGAAAATTGGCAACAGCAAATATCCCAAGCTCAAATTAAAGAAGTTATCCAAATTGAACTTAAAGATACGCAAACTGGCATTGAATTAATTTTAAAAACGGCCGATCAATCCCAGCTAATACCCTTAATTATTAGTGAGGACAATATTCTCATCATCGATATTTTAGACGCAGTTTTAAGGCTACCAGATGGGGAAAATTTTATAGTTGAGAATCCCAGT…	VWGAQKMIKILEQTSLAVLIGLTALHSGVALGSVGESNLSEKEKLEDQELQNEYKANVKIENWQQQISQAQIKEVIQIELKDTQTGIELILKTADQSQLIPLIISEDNILIIDILDAVLRLPDGENFIVENPSEQISQITAVQTSSNSLRITVTGNGTVPAAQVIPSSENLILSLTPPINTVESEEEIEIVATREEEAAVQEFFVPNTSVATGTDTPIMDTPFSAQVVSEEVIRSQQAITLEDVLTNVSSVTFGGTTGGRETIFGIRGFGNQFSDTVPILRDGFRLYGGFQGITEVSHLQQVEVLKGPSSILYGQIEPGGVINLNSKKPLNEPFAEVEVQLGNQGLVRPRFDISGGLNPSGNLRYRLNGVYSNEASFRDFNQPLERFAYAPIVTYAITD…	ferrichrome-iron receptor	ferrichrome-iron receptor
NC_005232.1:465-3053:+	NC_005232.1	HRIBO	CDS	465	3053	+	slr6001			2589	863	Yes	4.31026	4.08433	4.1973	0.955254	1.08408	1.01967	7104.22	7973.6	1648.21	1952.24	1648.21	1952.24	1574.46	2116.39	GTG	TGA	GATGGGGTAAACAGC	GTGTCCGCCTCCCTGCAGAGAGTTATGTCGCTGAAAACAGCCGATATCATGGGTATACAACGTTATCCCATACGCCTATCCAATAGTACTTTTGAAGAAAAGTTTTGGAGTCCGGTAAATAGTCCCGTGTTAGATGAATTCGGAGCAGTCGAGTTTATTATGCACAGGGTAGAGGATGTGACGGCGATAGTTCATGAAAATAGTTTTGCCGTCCTCACAGAAATCACCAAAACTGAAAACCGCATTGCTCTTCAGGATATTATCCTGCGGTCAAGAGAACTAAAGCAGACTCTGTCGAAATTGCAGGAACATGAGGCTCGCATTCGCACTGCAGAGCGGATGCTAAGTCTTGGTACTTGGGAATATAATCCACAGACCGGCACGTTGAATTGGTCCAGG…	VSASLQRVMSLKTADIMGIQRYPIRLSNSTFEEKFWSPVNSPVLDEFGAVEFIMHRVEDVTAIVHENSFAVLTEITKTENRIALQDIILRSRELKQTLSKLQEHEARIRTAERMLSLGTWEYNPQTGTLNWSRHVFDIYGIPPTQKALDVEEYFAMVHPDDREASIAVYQSFMEENAPRIAFEHRVITRNGGVRCVKGVGERHWTPDGEIVVGCVQDITSFIRNRDKLTQAEYLLRLAGEKASLGGWRIELDPPVITWTSETAVIHGMPPDYSPPDVGTAVQFYAPEFREFIMEVFERCVQQGEPFDVICQLQVPDGRRPWIRAIGEAERDAQGKVIVVQGAFQDISTLREAQERFQLISKAANDVIWDWNFATNQVWWNDSITDLFGYALLDMEPGLE…	hybrid sensor histidine kinase/response regulator	Derived by automated computational analysis using gene prediction method: Protein Homology.
NC_000911.1:1031202-1033787:+	NC_000911.1	HRIBO	CDS	1031202	1033787	+	slr1227	SGL_RS06695	IAP75	2586	862	Yes	0.756959	3.13559	1.94628	0.339676	1.4419	0.890788	91.1	205.35	120.35	65.49	120.35	65.49	40.88	94.43	GTG	TAG	ATTGGGTGTCAGGAC	GTGTCAAACCAGAACAAAAGCGTGATTCTTTCTCCTTACTATCGACTTCTTTTGTTAACCAGTGGTCTTGTTCTGGGGGCATCTCCAGCCCAGGCAACTCAGGCATTTTCCCCCCTAAATATGTTGGCCGATGGGGACAACACGGAGCTATTAGTTTCGCCATCTTCAGAACTTAATTTCCCCGGCCCCACTTCCGAGTCAGAAGCTTCTAATTATTCAACTCTCCAGGAAGCTGCCCCCTCCGTCATAAACGCCCTCAATGGCGAGAATGGCGAGATCAGTGTTATCCCTCCTGAAATTGAGCAAATTGACGGCGATCGCCTGGGCCAGACAATGGAGATTAGTGCGGGTAATTTAGATGTCGGGGTTGATGATTTGCCCCCCATGGCCCCCGTTGAT…	VSNQNKSVILSPYYRLLLLTSGLVLGASPAQATQAFSPLNMLADGDNTELLVSPSSELNFPGPTSESEASNYSTLQEAAPSVINALNGENGEISVIPPEIEQIDGDRLGQTMEISAGNLDVGVDDLPPMAPVDSAELAQANELPHGNAVAQVAPRVAQVEQENLIAETKTDNQTDHVEPQSPLMAQAAVEEEVEAVEMEATEETTGVTEETPEETPSFTPDAPPTNTEGTPGPTQTLPSFTPPASPSTTTPAPAEEEPRVLVSEVLVTGTTPELELLVYNAIRTQPGRTTTRTQLQEDVNAIYATGYFSNVRVAPSDTPLGVRVTFEVQANPVFTGLNIRTVPETAEGKERILPQEVVDETFGEQYGKILNLRELQEGIKTINEWYSNQGYDLAQVVGS…	chloroplastic outer envelope membrane protein h omolog	chloroplastic outer envelope membrane protein homo log
NC_000911.1:3136019-3138604:-	NC_000911.1	HRIBO	CDS	3136019	3138604	-	sll0737	SGL_RS16440		2586	862	Yes	0.256703	0.252291	0.254497	0.348374	0.307046	0.32771	39.54	23.13	154.03	91.68	154.03	91.68	53.66	28.15	ATG	TAA	TGAGTATTGCCCAGT	ATGGCCGCCGATTCATCCTCTCCTCCGGTTAGTTCCCCTTCATCCACTTCCCCTTCTAGTAACCCAGGACGATTGTTGGGGCTATTGACGGCCTTACTCTATGGGCTATTCACCCTGTTACCTAATGGCCATAGCTTGATGGTGGGTTGGCCCTGGGTCTTTGTTTGGCAGACCTGGTTTTGGTTAACTGCGCTGTGGTGTTTGTGGCAAATCGGACAAAATAAACGCTTAATTTCCCTCGGATTAGGGTTCGACTGGTTAATGGTGGCGTTGGCGATCGCCGCAATGCTAAGTGTGGTAGGGGCGGAATTTCCCCAGCAGGCCCGTTGGTATGGCTGGATATTTTGCGCTTTTCTAGCCGGTTTATACGGCCTAAGAAGTTGGCTAAAAGTTCAAACC…	MAADSSSPPVSSPSSTSPSSNPGRLLGLLTALLYGLFTLLPNGHSLMVGWPWVFVWQTWFWLTALWCLWQIGQNKRLISLGLGFDWLMVALAIAAMLSVVGAEFPQQARWYGWIFCAFLAGLYGLRSWLKVQTNPLVSINKLLTFQGYVGFAFIVISLLLWFTQTLIPFWQSAAIAREMGITKTFTFGILELQNWAPIGHQNYVAGYLVLILPLLSVLIWLNEGKKRWFWSVALSLGLIDFYTTSSRGGLLGLATLLLLVIIGIGLLRQLPWRWWLGLGTLAIAVVGIFICTNDRLLTSFTGIMGGQGAGQFAYRLINFEIGWRMGSAHPWTGIGLGNVPLQYQLYRPVWAGRESEFIYQLHSTPAQLFAELGVWGILIPSLLIIGLIWQLIRSLIKQN…	hypothetical protein	hypothetical protein
NC_000911.1:2501221-2503803:-	NC_000911.1	HRIBO	CDS	2501221	2503803	-	sll0002		ponA	2583	861	Yes	0.432713	3.49605	1.96438	0.329479	2.46983	1.39965	25.82	110.65	59.67	31.65	59.67	31.65	19.66	78.17	GTG	TAA	GCGAACACATTGGAA	GTGGAGGAAGAGGTTAAATCTTCGGCGATCGAGGAAAAGACTCTCCCCGTTGCACAGGTTGCACAACATCTTGAGTCTGAAGCGCAAAATTCTGTCGATGGCGATGATGGGTTAATTTTCCCTGGGGATGGCGATGCCGCCGAACTGGAACCGGGTTATGGCAGGGGCAGGGAAATGGTTACAGCCATTAATATTCAAAACGTTCAACACCATAGCTCAGCCAATGGAGCAGCAGCAGCGGAGCAAAACAAAAGCAATGGTAATGGTAGTGAACCTGGGGCATCTACCGTCACTGCTGAGCAAGTTACGTCCGTTCCCCTATCCTCTGCCGACAATACATTGGAGAGGGGGAGCCGCCGCCGTCGCCGCCGCAAAAGGGGTAAACATAAACAGTCTGCG…	VEEEVKSSAIEEKTLPVAQVAQHLESEAQNSVDGDDGLIFPGDGDAAELEPGYGRGREMVTAINIQNVQHHSSANGAAAAEQNKSNGNGSEPGASTVTAEQVTSVPLSSADNTLERGSRRRRRRKRGKHKQSAPKTPLALVTGLKNVGRSVSQLTQQPRFWLVFGFGLGAGMGTSALAWGFYQLETMTQVAIADVVTYAPRGTMTIKAANGAILQEIGNVSHDKVTMGEIPPLVEQAFVASEDSRFREHRGIDLQGIMRASLSNVQSGGVMQGGSTITQQLARLVFLTQDRTLARKLKEVRLAQKIETALPKDQILERYLNLIYLGSGAYGVADAAHAYFSKTPEELTLGEAATLAGVVPAPSVYSPRQNLELATRRRNEVLNRMAEVGFITPAEAQAA…	penicillin-binding protein	penicillin-binding protein
NC_000911.1:2687952-2690534:+	NC_000911.1	HRIBO	CDS	2687952	2690534	+	slr0417	SGL_RS14415	gyrA	2583	861	Yes	1.03228	4.59333	2.81281	0.577996	1.52762	1.05281	79.94	140.51	77.44	30.59	77.44	30.59	44.76	46.73	ATG	TGA	CCTTGGAGTAATTGC	ATGACTGACTCGCCCGATCGCCTGATTGCGACTGACCTCAGAAACGAAATGTCACAGTCATACCTGGAATATGCCATGAGTGTGATTGTTGGGCGGGCGTTACCCGATGCACGGGATGGGTTGAAGCCAGTCCATCGGCGCATTCTCTATGCCATGTACGAGCTGGGGCTGACCCCCGATCGCCCCTTTCGGAAATGTGCCCGGGTGGTGGGGGAAGTGCTGGGGAAATATCATCCCCACGGTGATACGGCGGTGTACGATGCCTTGGTGCGCATGGCCCAGGACTTTTCCATGCGGGAACCGCTTATTGACGGCCACGGGAACTTTGGCTCCGTGGATAATGATCCCCCGGCGGCGATGCGGTACACGGAATCTCGCCTTAGACCCCTTTCCACCAAC…	MTDSPDRLIATDLRNEMSQSYLEYAMSVIVGRALPDARDGLKPVHRRILYAMYELGLTPDRPFRKCARVVGEVLGKYHPHGDTAVYDALVRMAQDFSMREPLIDGHGNFGSVDNDPPAAMRYTESRLRPLSTNSLLRDIEAETVDFIDNFDGSQQEPTVLPARIPQLLINGSSGIAVGMATNIPPHNLGEVIDGAIALIRNPEITEQELMQIIPGPDFPTGAQILGRSGIREAYLTGRGSITMRGVASIETMEHPGRPDRDAIIVTELPYQTNKAALIERIADLVNDKKIDGIADIRDESDRDGMRIVIELKRDAYARVVLNNLYKQTPIQSNFGANLLALVNGTPEVLTIKKFLTVFWEFRIETITRRTRYELRKAEERDHLLQGLLIALDNLDAVIR…	DNA gyrase subunit A	DNA gyrase subunit A
NC_000911.1:1117107-1119674:+	NC_000911.1	HRIBO	CDS	1117107	1119674	+	slr1367		glgP	2568	856	Yes	1.04575	7.78449	4.41512	0.380059	1.36944	0.87475	35.66	136.54	34.1	17.54	34.1	17.54	12.96	24.02	GTG	TAG	CGTCGGCTAGCCTGG	GTGATGTCACCCCGACTTTTTCATCAGGAACAATCAATGATTGATCAATCTACCCTAAACACTTCCCCTCAACCCACTATCACAATTGAAGATGACCGCACCGGCATGAGTGTGGCCACTTTGAAGCGGGCCTTTTTGGATAACCTTTTTTATCTACAGGGGATTGATCGTTCCCAGGCAACCCTCTACGACTACTACGTTGCCCTGGCCTATACCATCCGCGATCGCCTGTTGCATCGTTTCATCAAGACCGTCGCCACCTATAAGCAGGAAAAAGTGAAGGTGGTTTGTTACCTGTCGGCGGAATTCCTGATGGGACGGCATTTAGGCAATAACCTCATTAACCTGGGGTTGTACGACAAAATCGACCAGGTAATGAAAGAATTTGACCTGGACTTA…	VMSPRLFHQEQSMIDQSTLNTSPQPTITIEDDRTGMSVATLKRAFLDNLFYLQGIDRSQATLYDYYVALAYTIRDRLLHRFIKTVATYKQEKVKVVCYLSAEFLMGRHLGNNLINLGLYDKIDQVMKEFDLDLNEIIEQEPDPGLGNGGLGRLAACFLDSLASLEVPAIGYGIRYEFGIFHQRIQDGWQVEVPDNWLRFGNPWEIPRADESVEVKLGGHTEIIHNEKNQPKVVWIPERTILAIPYDTPVPGYQTNTVNPLRLWKAEASEEFNFEAFNSGLYDRAVAEKMDAETISKVLYPNDNTPAGRELRLAQQYFFVSASLQDLIRIHLRTHPNLDTFYELTAIQLNDTHPAVAIAELMRLFVDRYDYDWDKAWDITQKTFAYTNHTLMPEALERWS…	glycogen phosphorylase	glycogen phosphorylase
NC_000911.1:197624-200185:+	NC_000911.1	HRIBO	CDS	197624	200185	+	slr1102			2562	854	Yes	0.701266	5.53516	3.11821	0.304258	2.20451	1.25438	30.47	103.12	43.45	18.63	43.45	18.63	13.22	41.07	ATG	TAA	ACCATCCCCTGAGCC	ATGCCATCCATGAGTAACGATTCCATTGTCCGCCACGTCCTGGTCATTGAGGATCAGAAATCTCGTCGCATTGTTTCCCTAGAAGAAAACACCTACGACATCGGTCGGGACCCCAGCAGTGCCATCCCTATTTACGATCGCCAAGTTTCCCGTCACCACGCAACCCTGATCCGGGTTAACGACTATCAGAATCATCAATACACCTATAGATTAATTGACGGTAATCTCCAGGGAAAACGCAGCACCAATGGCGTGGTGGTCAACGGTCAATATTGTCTTTCCCATGAGTTGGAGCACGGGGACGTAATTCGCTTTGGCAATCAGTCCAAAGCCAGCTACCACATTATGAATCTGACCACAGAATCGGAGGAGCAACCCTACGGAGCCGAACCTGTGTCG…	MPSMSNDSIVRHVLVIEDQKSRRIVSLEENTYDIGRDPSSAIPIYDRQVSRHHATLIRVNDYQNHQYTYRLIDGNLQGKRSTNGVVVNGQYCLSHELEHGDVIRFGNQSKASYHIMNLTTESEEQPYGAEPVSVVANPIMGETYVDPLNFAMADHGYGEGAGFDHEAVEVEEDSSFSTAVVYNDEIPDVSRSAPLPSHRPPASLSENSTQLIVELTTAGQVIYANGATKALFPELMAIQAQHPLIQGLSNLSLTREGLQLERDIAIGQQIFHQRIFLGPDRSRLQCYSEDVTEYRKMEQGLNDLHHRLQAYREYSATGFLLVDARTKTVVEANSAFCQLLGYEESEVLDFTLYQLIAAERPVIEELLINLETQNYLSVPELEYRNREGQTVQVKGEVYR…	hypothetical protein	hypothetical protein
NC_000911.1:39802-42363:+	NC_000911.1	HRIBO	CDS	39802	42363	+	slr1490		fhuA	2562	854	Yes	0.0732255	0.458417	0.265821	0.113657	0.780688	0.447172	3.26	22.93	44.52	50.02	44.52	50.02	5.06	39.05	GTG	TAA	GAATTTCAAGCTTTG	GTGCAAGGAGTGATTATGAATCAAGTACAGTGGTCGGTTTTGTTGATGGGTATAGTTTCGCTACTATGTGCTCCCAGGGCGTGGGCCGAAACTAATCCGAACCAATTGAACAGGACGAATATTTTAGAATCTGGTAACTTAGAACGCACCAAAGCCGGTGATTTGCTCCCAGTTGCAACCACTGTTGATGAGTGGATAACCCAAATTGCCCAAGCTTCGATCATCGAAATCAAGGAAGCCCGGATCAATTTGACCGAAGCTGGACTGGAACTGACCCTGGCTACCACGGGCCGCTTATCAACACCAACCACTTCCGTAGTGGGCAATGCACTAATTGTAGATATTCCCAATGCCATCCTAGCCTTGCCGGATAGTGACGGACTGCAACAGGAAAACCCC…	VQGVIMNQVQWSVLLMGIVSLLCAPRAWAETNPNQLNRTNILESGNLERTKAGDLLPVATTVDEWITQIAQASIIEIKEARINLTEAGLELTLATTGRLSTPTTSVVGNALIVDIPNAILALPDSDGLQQENPTEEIALVSVTALPDNIVRIAITGVNVPPTVEVNATDQSLVLGLSPGKGVADEEDGNDAIQVVVTGEQDEGYAVDDATTATLTDTPLRDIPQSIQVVPQQVLEDRQIIRASEALQNVSGVQRGNTVGGTSEIFNIRGFQQFGGTLRDGFKFRDNFSIPDTANLQRIEVLKGPASVLYGNLDPGGVINYITKQPLSEPFYEVAMQAGNFGLVRPTIDLSGPLNSQRTALYRLNAAYEGGGNFRDFDTEVARFFISPVVTWQISDQTDL…	ferrichrome-iron receptor	ferrichrome-iron receptor
NC_000911.1:17853-20408:-	NC_000911.1	HRIBO	CDS	17853	20408	-	sll1206	SGL_RS01950	iutA	2556	852	Yes	0.228519	0.690537	0.459528	0.365631	1.46547	0.915552	1.25	2.7	5.47	3.91	5.47	3.91	2	5.73	GTG	TAA	ACAAGTAACTGACGT	GTGGGAGGACGTGACATGAAAACAAGATTAGTACGATTTGGCTGGACGATCGCCCTTGGAATAGTGATGGAAACGATGGCTATGCCCCTGGGGGCTCAAGAAATTATTAGTGAGCCATCCCCATCTGTGACAGTGGAACTGGATCAGGGGACATCGTTGGTACAAGTGCAGGAAGTGCGTCTAGAGCCATCGGGGCCAGGGTTAGAAATTATTTTGGTGACAGCGGGAGGGGCGATCGCCTCTCCGAACCTACAAACGGTGGGCAATGCCTTAATTATTGATCTTCCCAATACTTTGATGGCCTTACCTGGGGGCCAGGGGTTTGAAGAAGTGAGCCCCACTGCGGACATTGCGTTTGTCAGTGTTACCCAAATGACCGATAACCAAGTGCGCTTAGCT…	VGGRDMKTRLVRFGWTIALGIVMETMAMPLGAQEIISEPSPSVTVELDQGTSLVQVQEVRLEPSGPGLEIILVTAGGAIASPNLQTVGNALIIDLPNTLMALPGGQGFEEVSPTADIAFVSVTQMTDNQVRLAITGVNGPPEAEVKPNSQGLQLLIRPGVAGTTAEIEESEALQIVVSATRTEEEIANIPRSVTVIERAEIEQQTQVYSSLADILGQLVPGLAPSTGSASQFGQALRGRNVLVLIDGVPQTTNRNAFRDLQTIAPSAIERIEVIQGPTAIYGDGATGGVINIITRGPAPEPFLASTRLAINTDFDSVSNSLGRMVEQYVGGTLDYADYAFTASYESVGGFFDALGNRIPPDPNGQGGVSDTDSFNVLGKLGINMTDEQRLQITINHFQA…	ferric aerobactin receptor, FhuA homolog	ferric aerobactin receptor, FhuA homolog
NC_000911.1:1073080-1075629:-	NC_000911.1	HRIBO	CDS	1073080	1075629	-	sll1356	SGL_RS06895	glgP	2550	850	Yes	0.657878	8.17656	4.41722	0.623832	3.05728	1.84056	31.69	155.6	48.17	19.03	48.17	19.03	30.05	58.18	ATG	TAG	AAAGGCACAGCATTA	ATGGAGCACCTTCCCATGGCTTTTAACACCACCAATCCCCTCATTCAGGTGGAGGATGACCGCACTGGTCTGAGCGTGGAAACCCTCAAGCGGGCTTTGGCAGACAATTTGTTTTATCTCCAGGGTAAATTTCCCGCCATTGCCACTAAAAACGATTGTTATATGGCCCTGGCCTACACTATCCGCGATCGCCTCCTGCAACGGTGGTTAAATACATTCCAAACCTATCTCAACTGTGACAATCGGGTGGTGTGCTATCTGTCGGCGGAATATTTGCTGGGGCCCCATTTGGGTAATAACCTAATTAATTTAGGGCTATGGGAGCCGGTGCAACAGGCGGTGGAAGAATCGGGGTTGAGCTTGGATGAGTTAATTGATATTGAAGAAGAACCGGGGTTG…	MEHLPMAFNTTNPLIQVEDDRTGLSVETLKRALADNLFYLQGKFPAIATKNDCYMALAYTIRDRLLQRWLNTFQTYLNCDNRVVCYLSAEYLLGPHLGNNLINLGLWEPVQQAVEESGLSLDELIDIEEEPGLGNGGLGRLAACFMDSLATLEIPAIGYGIRYEFGIFDQEIKDGWQVEITDKWLQLGNPWEIARPESAVLVKLGGHTEPYTDDQGNYRVRWIAGSLVKGIPYDTPILGYKVSTANNLRLWKSEAAESFDFQRFNVGDYYGAVQDKMSSENLTKVLYPNDEQIQGKELRLAQQYFFVSCSLQDMIRIHLSDNPTLENFHEHFAVQMNDTHPSIAVAELMRLLVDEHHYEWQRAWAITEATFGFTNHTLLPEALEKWSLPLFGEMLPRHL…	glycogen phosphorylase	glycogen phosphorylase
NC_000911.1:3193999-3196542:+	NC_000911.1	HRIBO	CDS	3193999	3196542	+	slr0534		slt	2544	848	Yes	0.392337	1.06777	0.730053	0.560173	1.58595	1.07306	7.27	12.92	18.53	12.1	18.53	12.1	10.38	19.19	GTG	TAA	AGATAAGGTAGAGTT	GTGGTTTGGCATTATTCCAACATTATGCACAAGAAATCAAAGGCCCAATTGCAGGATTATTTCAAGGATTTAACCGCAATAGGGAATGCTTCATCGGAGCAGATGGAGGCCAACCGGGATGGCATCCAGGGGGAAACGGAGGAAAATATTAATCCTCCCCCGCAAAATCCGAAAAAAAGGCTATCTTTACCGAATTTATCTAGTCCGTCCTTGGCAGCAGAGGCGGAAAACCTAGAAAGTGCAGGGCAACCTGGGTCAGACTACTTATCTAATTCATTCGGCCAAGCTAATAAAGCCAATGTTGCCGTTGCGCCGGTAAATTCAGATTACATTGCCCCAGAGAAATTGGAAGATCAACCCGGGGATTTTTTCGGCGGTAAACGCTGGTTCTGGTTGGGA…	VVWHYSNIMHKKSKAQLQDYFKDLTAIGNASSEQMEANRDGIQGETEENINPPPQNPKKRLSLPNLSSPSLAAEAENLESAGQPGSDYLSNSFGQANKANVAVAPVNSDYIAPEKLEDQPGDFFGGKRWFWLGGILVLLVGGTALTLPKALEMVNGWRQEAQLKAYEQEQHQDSEVLRLALLPPDQRRSKLEAIANQEVLSLERSRARFLLAGDLLAEFEGGPALRVLEGLEVQYPVLAPYILLMRGRGYQLSNENDQAEATWQDILDQYPDSPVVVNALENLGSLDETYWQQAIADHPGHPRTLAILHQQLESEPNALEIQRQILQNHPTDGRTAAVINSLTANRQGELTPEDWQAMGDNFWHRRIYNQAIAPYEKAPSNARNLYRLARAQQISKLDN…	probable transglycosylase	probable transglycosylase
NC_000911.1:1785835-1788372:-	NC_000911.1	HRIBO	CDS	1785835	1788372	-	sll1885			2538	846	Yes	0.494659	0.690306	0.592482	1.35838	1.56292	1.46065	13.43	62.59	27.15	90.67	27.15	90.67	36.88	141.71	GTG	TAG	TGGTGTGAGTTTTGA	GTGAGGAACAACCGCATGACTTTCAAAAAGCCGGCCCAGATGCTTGGTCTTCTAGGAGCATGGTTAGTGCTTGGGGCCTGGAGCAGTAACACGGATCACCATGGTATCAGTTCTCCGTCGGCTTTGGCTGATCCCCCATTTCCCAATCAAAAAATTTCCCCTGTCTTCACTCAAAACAATGATTACAGTTCTACTATTTCCTTTTCCCCTGCAACCCTAGTTAGCCAACGCCCCAGTCGATCCGGTGGTCGTTCCATTTTAATGGTCGAAGCAGAGGAGGATAATTTTGCCGTTCTCCAAGCCGTTACCCTCACCGTTGATAACGTAATTTTGCACATTAACGGGCAACAAACCGCCGCTGAGTTGACCCTAGATTCCCGCACCAATCGTTTAGCTCTG…	VRNNRMTFKKPAQMLGLLGAWLVLGAWSSNTDHHGISSPSALADPPFPNQKISPVFTQNNDYSSTISFSPATLVSQRPSRSGGRSILMVEAEEDNFAVLQAVTLTVDNVILHINGQQTAAELTLDSRTNRLALVVEGVKLADSIPINQDNAGPDGTLMKRRLRIKQLDRGVVEVSLNAQEQSWTVRSHNQGLLLAPTAIANTAETLEIKDEVSQGELSPEETLILSQTTAIDGARVEETSVETTTTESAQNGITEESSDLNQTNGLDIITGPIEPTISSEESTVNVLETQRENDSNQEKLAVVQTDQIEVTEVEVTETETLDTVEFVQEEVVEESPPEESEITTPLLRQPLRILNLPTANQLLQGQVLGAFGQTQTFGGPGMGNQTYFIYADWGLTNDL…	unknown protein	unknown protein
NC_000911.1:897354-899888:+	NC_000911.1	HRIBO	CDS	897354	899888	+	slr1212	SGL_RS06075	ETR1	2535	845	Yes	0.406723	0.697443	0.552083	0.262185	0.625	0.443592	2.42	4.91	5.95	7.04	5.95	7.04	1.56	4.4	ATG	TAG	ACTAAAGGTACGTCC	ATGGCAATCACCGCATTTACCCTGGGGGATTTTTTCCAAGCCAACAGCTATATACCCCACGGCCATTGCTACCTTTGGCAAACTCCCCTGGTCTGGCTCCACGTCAGCGCTGATTTTTTCACGGCGATCGCCTACTACTCTATTCCCTTAACTCTGCTCTACTTTTTGCGGAAGCGCCAAGATATTCCTTTTCCTAATATTATTTTCCTGTTTAGTACTTTTATTTTATGCTGTGGCACCAGTCACTTTTTTGACATTATCACCCTTTGGTACCCTATTTATTGGATATCCGGTACAGTCAAAGCCTCCATGGCGATCGTCTCTATTATCACTGTGTTTGAATTAATTCAAATTGTACCCAATGCCCTAAATTTAAAATCCCCCACGGAATTAGCTACC…	MAITAFTLGDFFQANSYIPHGHCYLWQTPLVWLHVSADFFTAIAYYSIPLTLLYFLRKRQDIPFPNIIFLFSTFILCCGTSHFFDIITLWYPIYWISGTVKASMAIVSIITVFELIQIVPNALNLKSPTELATLNLALNQEIKERQTAEIALQELNNNLEKRVEDRTTQLAKINQQLEQEIEDKTRAKEDLEKNKDQLAQLAAIVESSQDAIISKTLDGNITSWNESAERLFGYTAEEMIGSHITKLIPEELILEEDLIAECIRQGQRINTYETQRQRKDGTKIDVALTISPIRDEHKNVVGASKIVRDITARLDVENALRESQYFIEKLANYSPQILYILDPIAWKNIYVNYQSFEILGYTPEEFKNGGTELLLNIVHPDDIPTLYENKNFWQKSQEG…	similar to two-component sensor histidine kinas e	similar to two-component sensor histidine kinase
NC_000911.1:3363266-3365797:-	NC_000911.1	HRIBO	CDS	3363266	3365797	-	sll1496	SGL_RS17400		2532	844	Yes	0.51298	2.51236	1.51267	0.694429	2.80999	1.75221	18.97	51.83	36.98	20.63	36.98	20.63	25.68	57.97	ATG	TGA	CACTGAGGTAAAGGA	ATGCGAGCTGTGTTGATGGCAGGGGGGGCAGGCACCCGTTTGAGACCCCTGACTTGCGATCTGCCCAAGCCCATGGTGCCCATTGTTAATCAACCGATCGCCGCCCATATTATCCATTTGCTCCGTCGCCATAACATTACTGAGGTGGTGGCCACCCTCCACTACCTCCCTGATGCCATGCGGGACTATTTCCTTGATGGCAGTGAATTTGGTGTTCAGATGACCTATGCAGTGGAGGACGAGCATCCCCTCGGTACGGCGGGTTGTGTAAAGAACATTGAAGAGTTATTGGATGATACTTTTTTGGTAATTAGTGGGGATAGCATCACCGATTTTAATCTCACCCAGGCGATCGCCTTCCACAAACAAAAACAAGCCAAGGCGACCCTGATTTTGACC…	MRAVLMAGGAGTRLRPLTCDLPKPMVPIVNQPIAAHIIHLLRRHNITEVVATLHYLPDAMRDYFLDGSEFGVQMTYAVEDEHPLGTAGCVKNIEELLDDTFLVISGDSITDFNLTQAIAFHKQKQAKATLILTKVPNPLEFGVVITDENQRVQRFLEKPSTSEVFSDTVNTGTYILEPEVLAYLPPKEEMDFSKDLFPLLLENDEPMYGFVADGYWCDVGNLDAYREAQYDALEKKVTLELGNLPRHSDIWIGENTTIDPTAILTPPLAIGDNCNIGSGTKLEAGTIIGDNVTIGAGAELKRAIVWNGVLIGDEAYLAACVVGRGCRIERRVQVLEGAVIGPLSIIGEEAQINSNVKVWPSKRVEPGAILNINLIWGSTGHRNLFGQRGVSGIVNIDMT…	mannose-1-phosphate guanyltransferase	mannose-1-phosphate guanyltransferase
NC_000911.1:309649-312171:+	NC_000911.1	HRIBO	CDS	309649	312171	+	slr1305	SGL_RS03320		2523	841	Yes	1.06997	2.38769	1.72883	0.641356	3.97208	2.30672	34.1	37.63	31.87	15.76	31.87	15.76	20.44	62.6	ATG	TGA	GTCCCTGAGAGGTCA	ATGTCATCCCCCCAAGTCCCCACAGTTTTTGCCATTGACGATAGCCCTTTGAATCTTAAAATTCTCCAGCGTTTTCTGGAAAAACAAGGCTGGAAAGTGTTCATAGCGGAGGATGGATTAACAGCCATTACTGAGATCAACCAAGTGCAACCGGACATAATTGTTTTGGATATTATGATGCCCGGTATAGATGGCTTTGAAGTTTGTCGTCGTCTCAAAGCGGCTCCAGCCACAGCGGAAATTCCGATCATTTTTCTTTCTGCCCTCACCGATCAAAAAAGCATTGTCAAAGGATTAGAATTGGGGGCAGTGGACTACATCCACAAACCATTTCAGCAAGAGGAAATTATCACCCGTTTACAACTACAACTCAAGTTACATCAAACAAACCAAGCTCTG…	MSSPQVPTVFAIDDSPLNLKILQRFLEKQGWKVFIAEDGLTAITEINQVQPDIIVLDIMMPGIDGFEVCRRLKAAPATAEIPIIFLSALTDQKSIVKGLELGAVDYIHKPFQQEEIITRLQLQLKLHQTNQALLQKNQQLEEQIEKTARTQAALMQSEINFAVAFNQSPDPIFIYGRNSGCIMDVNQPFCQFFGLTKQELVGVSRQQFYFWVDEQQRQSFLRDLLLWQKDGLVKFENREIEVYDQEKQVRTMLLSGEPMEFNRVDCLLFVMRDITERRKAEKQLKILSQACEQSPASIVITDVQGNITYVNPKFEEISGYKSAEVLGRNPRILKSGNKTQEDYELMWKTLASGRNWHGEFHNRRKNGELYWERASISPISNQQGIVTHYVAVKEDITKE…	two-component response regulator	two-component response regulator
NC_000911.1:999053-1001563:+	NC_000911.1	HRIBO	CDS	999053	1001563	+	slr1552			2511	837	Yes	0.447894	1.44162	0.944759	0.211752	1.28426	0.748008	4.04	5.68	9.02	3.94	9.02	3.94	1.91	5.06	ATG	TAG	TATCGGTCACCCGAA	ATGCCCCTAACTGAGTCATTCTTGGATCTAATGCTAATTCCTATAATCGGTTTTGGTTTGGCTGTTATTTTATTGATTGGATTTTTTCTGCTCTATCAGGAAGTCGGCATTTTTAAAAACTTAAAATTCCTCGTTATTCGGAAAAATAACCCCTTTTTTATTCTTGCTTTATTTTGTCTTATTACAGGCTTAGCTTTAGGATTAGTGGGCTATTGGGGCATTCTAGAACCAAAGCTTGGTGCGGCTGATTTACAAGCCTTAAGACGTAATTTAATCATCTTGAGTTTATTACTTTTTGGGGTAACGTTTCGTCAATATTTATTTGATTTGATTAAACCCGTTACCACCATGGCAATTTGGCGAAAAATTGGCACTTTTAACTATAAAAATCGTATTGCC…	MPLTESFLDLMLIPIIGFGLAVILLIGFFLLYQEVGIFKNLKFLVIRKNNPFFILALFCLITGLALGLVGYWGILEPKLGAADLQALRRNLIILSLLLFGVTFRQYLFDLIKPVTTMAIWRKIGTFNYKNRIAILTYVLLGLIALAWMAPMASTKIIFSINDHTSHIGYIVQGRMALEEGQFPLRVAPLENFGFRYPGFQFYSQLPYFFGAIIYKFLTPTNPYTAYKILLWSALWLGGIFIYRVGFFFTRSQIAAILGGVTYMSAPYFLNNVHARGAFTEAIAQGILAIVLFYAIQTFYYPHYRHLILGALAWCALGLTHIITFVYTTIFIALLGAIFLVKNKPNHWQKGITYISLSYIWAWLLALYFLAPVALESGSLAIRRQIQAINPFNTTDITPI…	unknown protein	unknown protein
NC_000911.1:1892918-1895425:+	NC_000911.1	HRIBO	CDS	1892918	1895425	+	slr1529	SGL_RS10820		2508	836	Yes	0.697138	7.06383	3.88048	0.22337	2.11489	1.16913	8.77	33.2	12.58	4.7	12.58	4.7	2.81	9.94	ATG	TAA	CTCAGGGGTTTTGCC	ATGACCGATCGCCTTTCCTATTTGCTTTCCTGGCTCCGACAACGGACGGAATTAGGCCAACTTGCCCCGGAGATTCTGGAGGCGATCGCCAGCCAATTAATTGAATTTTCCCTGGCTAAGGGTGAAAGTCTGCCCAAAGATAGGGACAAGGGAACGGACTTGTACATTCTTGGTCAAGGACAGTTGGAATCTGATGCCCGGAAATTTTGTTTATTGCCAGGGGCAATTATTAATCTAGAGGCATTCATAATTGATAGTCCCCTAGAACAGGATTTAGTCGCCCTTACTGACTGCCAATTGTGGTATTTACCAGGGCAAAAAATGCGGCAATTGCTGCAAGATTATCCCCAGATAACTCAGGCTTTTTCCCAACAATTGGTGCAGGAACTCAGGGAACTG…	MTDRLSYLLSWLRQRTELGQLAPEILEAIASQLIEFSLAKGESLPKDRDKGTDLYILGQGQLESDARKFCLLPGAIINLEAFIIDSPLEQDLVALTDCQLWYLPGQKMRQLLQDYPQITQAFSQQLVQELRELNAQLFFEQEKQKILRPYLVPAAKRAIMGKSRYAQKLREQIKAVSTDQKPVLLFGEPGLEKDNTAALIHFGSAQAQRSVMVKVNCALLSASGQELFGTNQGKPGILDALGQGTLLLNNIQELKPQLLPAIANLICEGIYQPVATAGGAEPTFRHSQAKVIAIAENIIPKLTSLFTNTIKIPPLRVRKADIEDYVDYYLSLICRSKGIEVPNLAPEALRRLQAYDFPNNIRELNNLVERAVTQLQGEKVITEEIIWPSQGKKQLFRLN…	nitrogen assimilation regulatory protein	nitrogen assimilation regulatory protein
NC_000911.1:253125-255629:-	NC_000911.1	HRIBO	CDS	253125	255629	-	sll1672	SGL_RS03040	hik12	2505	835	Yes	0.352699	1.82278	1.08774	0.275649	1.74013	1.00789	8.56	24.48	24.27	13.43	24.27	13.43	6.69	23.37	ATG	TAG	AAAATAGAAGATAAA	ATGCAAATCAATAACCATGTTTTCAAAGGTTTGGCTGATTTTCGATCAGTGTCTTGGCAAAGGCAAATTATAGTGGCGATCGCCATCTATGGAACTATCTATATTTCCCAATTATTTATTACCTATGCGGGCACCGCTTCATCGCCCATTTGGATTCCTACGGGTATGGCTGTAGGCTTTTTATCTATTTGGGGTTACCAAGTCTGGCCGGGTATGGTTGGGGGATTATTACTGGGAGAAATTATGGCTCTCCACGGTTTGGAAAGTGCTGCTAATTTCATACTAACGGTGGCGATCACTGGGGTAGTCAGTTTAGTCAATCTTTTTTCAGTCTATCTTAGTGACATTCTTACAGCCAATAATTATCTATTTTCTAAAATTAAGAATATTATTAGATTT…	MQINNHVFKGLADFRSVSWQRQIIVAIAIYGTIYISQLFITYAGTASSPIWIPTGMAVGFLSIWGYQVWPGMVGGLLLGEIMALHGLESAANFILTVAITGVVSLVNLFSVYLSDILTANNYLFSKIKNIIRFIVFVCFGSRLPAAIICPFLLYLFEKISFGLYSEIAYTWLLSDAFALLIVTPFIIACNHNFKVFIKLLQEQWLEAASIIFFILLIVKIIANGYPIEYLLIPFLLWSAFRFTEVGSSLLTIVVSALLVLILALDQEKAAIKDQLLLLQSILACISMTTLVLNAVLSENERSKNQLFTTNQILIEQNQKLQELYQQRELERAQREKILIEYNESLQKQVDLVRAKEIAESEAKAKSTFVANMSHELRSPLNAIIGFSQLMLRTKNLPME…	two-component hybrid sensor and regulator	two-component hybrid sensor and regulator
NC_000911.1:3395763-3398261:-	NC_000911.1	HRIBO	CDS	3395763	3398261	-	sll1477	SGL_RS17565		2499	833	Yes	0.213878	0.430995	0.322437	1.11287	2.74894	1.9309	4.87	26.42	22.77	61.3	22.77	61.3	25.34	168.51	ATG	TGA	TAGGGCAGTCCACAG	ATGAAGCAATGGCGCTGGCGGATGGTATTGGTGGCGATCGCCGCTCTGGTGGTGATTTCCCTAGCTACGCTGTTTCAACCTCAGGAAACCTCTGGCCGCATCCCGGATTATCAAATTAGCAGTCAGTTGCCCGCCAACCAGGTAGATTATTATCCTCTGCAACAGAATTTAGATGAGGCGTATTATCGGCCTTTGGGAGAGTGGTTGGGTCGTTTAATCCTGCCGACGGTGGAAGAAACTAAAGCCAGGACAGGAGATTGGGTTTGGTTGGAACTGTATCAAGCGCCTTCTATCCAACAGGGATTAGTGGGACAAAAACTCCGTCTCACCTGGCAGAGCAATGCTGATTTGGACAGATACCTCAAACTAGTGACCACGGATGTAAATTTTACCCCTGCC…	MKQWRWRMVLVAIAALVVISLATLFQPQETSGRIPDYQISSQLPANQVDYYPLQQNLDEAYYRPLGEWLGRLILPTVEETKARTGDWVWLELYQAPSIQQGLVGQKLRLTWQSNADLDRYLKLVTTDVNFTPAALKSEQAGNLLPNRLNGRSQVGPLQSLAGARPVDDVLVRFVQAQVNVPVGNQAEIKLATMPEMVTGRYQALVKIIGPAPNAPANAIPQDCPGTKPCPADLMLVQHYNPGSKEFDGPQETIRIPQQPHLNGDRFMSTPRDLASSPVGQAGWYVYGAQGKDGIFTVQSLNPRSLVQLQPDEQIFRLGPGRDYISHKNWQNTPARKGTVQKVLVDPRSDSPAVALGQWQEGDRLLGMHLFGGIGGALGEKIMLGTVTGHFSFSLPKVIR…	hypothetical protein	hypothetical protein
NC_000911.1:2107664-2110159:-	NC_000911.1	HRIBO	CDS	2107664	2110159	-	sll0270	SGL_RS11845	priA	2496	832	Yes	0.278592	1.91779	1.09819	0.144868	1.0593	0.602084	4.75	14.23	17.05	7.42	17.05	7.42	2.47	7.86	ATG	TAG	AAAAAGTAAGCAAAT	ATGACTGTTTCTCCCTCAGCCCTGGCGGAATTGGGGTTTAACTACCAGGAAGAAGATTCAGTGCGCCCTTGGGCGGCGGTGCTGGTGGATTTACCCCAAAATGAAGGGGTTTATACCTATGCCATTCCCCCAGGTTTAACCGTGCAGGATGGGGACATTGTGGCGGTGCCCTTTGGTAACCAGCAGTTGGGGGGCATTGTGGTGGGTTGTTTGACAAAACTGCCACCGGATTTGCCGCCGGAAAAAATTAAGCCCATTCAAGACGTAATTGTATCGGGCTTTTTTGCGCCCCATTATTGGCGGCTGTTGCATTGGTTGGCGGAATATTATTGCACCGAGTTAATCACCGTTATTCGCATGGCGTTGCCACCAGGTTTACTCCAGCGGTCCCAGCGTCGC…	MTVSPSALAELGFNYQEEDSVRPWAAVLVDLPQNEGVYTYAIPPGLTVQDGDIVAVPFGNQQLGGIVVGCLTKLPPDLPPEKIKPIQDVIVSGFFAPHYWRLLHWLAEYYCTELITVIRMALPPGLLQRSQRRIKLNGDRLPSDWPLFLSQPSHQGARQILTLLQSSKEGDYSYRYLRQKVPGLTKALRDLLKRQWVESYLEPPKAVQPQLPKMVTLLNFDPSFKLTELQARTLIVLKNQGGEMWLADLLKAVPCSASTIQSLAKKGLVAIAEREKLRLFQQPSINASQAPELTPAQKQACQTVLPLQGYHQVLLHGVTGSGKTEVYLQICGDRLGKGQSVLVLVPEIGLTPQLTDRFRARFGNKVAVYHSGLSSGEKYDTWRQTLLGHEQIVIGTRSA…	primosomal protein N'	primosomal protein N'
NC_000911.1:2497726-2500221:+	NC_000911.1	HRIBO	CDS	2497726	2500221	+	slr0020	SGL_RS13500	recG	2496	832	Yes	0.455567	1.78639	1.12098	0.42773	0.865633	0.646682	8.51	20.74	18.68	11.61	18.68	11.61	7.99	10.05	GTG	TAA	AACCGTCTTTAGCTG	GTGCAATGTAGCTTGGTTGAGGTGTCTGTGTCCGTTGATTGGCCTCGTTTACAAAAGGCTTTGACCGTGGAAGTGGAGCGGGGTTTTCAGAATTTGCAGGGTAAACAGCACCGCTTTGGCGACTTCCTCTGTTTAAGTTTTGGCAGTCCTCCCCCCCCTGGTAGTTCCCCCGGCGATCGCCAGAAATGGCGGGAGTTTGCCCAAAGATTTGCCCAGTATGACCAACTGGAGGAAGCTGAAAGAAAAAGTTTGGTGGCCAGTACCCGTCGTTTTTTACATCAATTACGTCGCAGTTTGGAATCTCCTCCTAGGGATTCTGTACCAAAAAAGGATTTACTAGCCCAGGTTAATCGTCCCCAAGTTTCCGAACCCCGTTATCCTAAATCGGGTCAAATTGAA…	VQCSLVEVSVSVDWPRLQKALTVEVERGFQNLQGKQHRFGDFLCLSFGSPPPPGSSPGDRQKWREFAQRFAQYDQLEEAERKSLVASTRRFLHQLRRSLESPPRDSVPKKDLLAQVNRPQVSEPRYPKSGQIELHTPLATVVSQSQHQTKLLKNLGLATVEDLLFYFPRDYLDYAQQVTIAELTAGETVTIVGRVVNCTCFTSPKNQNLNILQIQLRDQTGRIKLSRFYAGKRFAHRGWQEKIKKLYPPQAVVAASGLVKSSKFGLTLDNPEIEVLDRHSPSIDSFKVGRVLPVYPLTEGITADFLRKLVLACQTAIAKLSDPLPQEIREKYELIDLQTAIAQIHFPENTEKLSLARRRLVFDEFFYLQLGFLQRRYEQKQQQQSAIFTPHGELLEKFS…	DNA recombinase	DNA recombinase
NC_000911.1:2833378-2835867:+	NC_000911.1	HRIBO	CDS	2833378	2835867	+	slr0829			2490	830	Yes	0.279519	2.0943	1.18691	0.224729	1.27006	0.747392	9.54	34.2	34.13	16.33	34.13	16.33	7.67	20.74	GTG	TGA	CTAATTCTCCCCTTA	GTGCTGCAAGTTTTGCTGGTTATGGCAGTTTTGGTCTTTTCCGCGCTATCGTTAGATTTTTTCGGTCAACTTAATAATAATGTCTATCTTTTTCTAGTTCTGGGCATTATCATTTTTTTAATTCCCGCCCTGACTAGTCTCTACATTGCTCGTTTAGTCATTGAACCCCTACGAAAACTAGTTACTACCAGTCAAAATTTAGCCCAAGGCACTTCCCACGGCACCATAACACAACCAGTGGCCATTGCCGAAATTCAGCAGCTTGCCAAAGCCATCAATGGTATGGCCCTCCGGTTACAACAATCCCTGGCACAAACCAAGGAAGAACTCCAAGGCTCCAAAGAACTATATCGGCAAGTAGTACAAAGTCAGACAGATTTTATTTTACGCTCCCAACCA…	VLQVLLVMAVLVFSALSLDFFGQLNNNVYLFLVLGIIIFLIPALTSLYIARLVIEPLRKLVTTSQNLAQGTSHGTITQPVAIAEIQQLAKAINGMALRLQQSLAQTKEELQGSKELYRQVVQSQTDFILRSQPDTTITFANDALCQALGLALPEVIGLQWLDFIVEEDLKIVLDKIACLTPEQPQFINENQDKRAGGVLGYTQWVSRGIFNDKGQLIEIQSVGRDISALKETQLELRQSQKFIESIAEATPSLLYIYDHIKQANIYSNRSVAEFLGYSPEEIKTMGASLFTNICHPEDLPRILAAIENCQKLRDGEILEIEYRVRDARQQWRWLLSRDLVFTRTETGQLWQTLGTAQDITQRKEAEIELEKIKTFLASIVENIPDMIFVKDAKTLRFLE…	unknown protein	unknown protein
NC_000911.1:29968-32454:-	NC_000911.1	HRIBO	CDS	29968	32454	-	sll1406	SGL_RS01990	fhuA	2487	829	Yes	0.530726	1.37535	0.953038	0.587989	4.4902	2.53909	3.8	4.91	7.16	3.57	7.16	3.57	4.21	16.03	GTG	TAG	GTGTGAGGAGCAATT	GTGAATACCAAAATAAGCTTAGGCTTAACCATATGTTGCCTATGTTCGGGGCTAGTAGCCCCCTTGCCCATACTGGCCCAAATTAATAATTCTGGGGCCCAAACCAAAATACAAGCTCAAGTTGGCTCCATCTTGGTTACCGGAGTTAATCTAAAGTCCACAGAAAAGGGTCTAGAGCTGGAACTGGCCAACAATTCCCCCATCCCGGTCCAACCCCTGATTTATCCCCAAGGGAATCTGCTCATTATTGAGTTGACCGATGCCCTCTTGGACATTCCCGGAGGAGAATTTAACCAGGAAAATCCTAGTCCCCAAATTGCGGCGATCGCCATTACCCAAGGGGAAAACAACATAGTCCGCATTACGGTGACGGGCGTTGATAATAATCTTCCTGAAGTG…	VNTKISLGLTICCLCSGLVAPLPILAQINNSGAQTKIQAQVGSILVTGVNLKSTEKGLELELANNSPIPVQPLIYPQGNLLIIELTDALLDIPGGEFNQENPSPQIAAIAITQGENNIVRITVTGVDNNLPEVTVSSVDQNLVLSLTSSSTAIAPENPESEIEVVATQEGQGEASYFVPSASTATGLDTPLLDIPQSIQVVPQQVLQDRNVTELGPALQTVPGVSPAGGRGTSVFGPGFLIRGFPVNNSIFRDGIPYQSLAPLNTTDIEQIEVLKGPSSIVFGAGEPGGSINLISKKPLDEPYYNAAVSLGNYNDYRLDVDLSGPLLPEAIDTVNYRLNVSYETSGSFRDFVYGDLWVVSPTLTWNIGPDTKLNIYGQYTTNRETLDEGIPAPNIADLP…	ferrichrome-iron receptor	ferrichrome-iron receptor
NC_000911.1:1759941-1762424:+	NC_000911.1	HRIBO	CDS	1759941	1762424	+	slr1959	SGL_RS10205		2484	828	Yes	0.256126	1.53318	0.894652	0.211067	1.12922	0.670144	3.24	13.17	12.65	8.59	12.65	8.59	2.67	9.7	ATG	TGA	CTTCCCATCACAGCT	ATGGATAAACCCAGTTCCTTTTTCGTTGTAGATTCTGAAGGTTCTCAAATACTTAGGGAAATTTGCATTATTAATCACTGTGGGGAAGTGGTATATGAAGCATTGGTGGATGAAGTCTTAGCAGATCGAGCACAGGGTTTAAAAGTTTTTCCTCTGAAACAGGTGTTGGAAAATTTTTGGCGCATCACCCATGGGCATTTAGTCATTTTCCATTATGCTGACCATGACTGCCGTGTCTTACGAAATAGCTGTTTGCAGGTGGGCATTCCTTGGCGGCCAATAAGCACCCAATGTACTATTGAGTTGGCCAAGGAAAAATATCCCGGCCTAAGCAGTTACTCTTTGGAGTTTTTGAGCAAAAAATTTTTCTTAAAGGTTGAAGGCAAGTATTTCAACCAA…	MDKPSSFFVVDSEGSQILREICIINHCGEVVYEALVDEVLADRAQGLKVFPLKQVLENFWRITHGHLVIFHYADHDCRVLRNSCLQVGIPWRPISTQCTIELAKEKYPGLSSYSLEFLSKKFFLKVEGKYFNQESAHRARYDALFTHQLYNFLQDCNGFSKSMNIGINPFSSSRVDTPFQEHVDAKAIYQQQFEQLKAIIKEVRQDKNRQSKGVVVTGIPGSGKTHLMMRLTKEILQINRVLFIRHPNNQESIIYHIYSRILESFIYQIPGTSYSQLEFLLAHSFTKLISQMKNIRLTQKDQHIVDIVQQNPLNIYQLLGTEGTDKKRDYWDHIEKRASEWWTEHYGIGGNSPEIIKGIIKFCRYTERYRQQTTARWLAGQELSEEDLMLLGLSNWHEN…	unknown protein	unknown protein
NC_000911.1:563448-565925:-	NC_000911.1	HRIBO	CDS	563448	565925	-	sll1946	SGL_RS04505		2478	826	Yes	0.20212	1.33804	0.770082	0.207237	2.31196	1.2596	5.53	12.31	27.36	9.2	27.36	9.2	5.67	21.27	ATG	TAG	CGTCTAACCCCTGCT	ATGGTTAAGCAAATTTTGTCTAAATCCTGGGGAGTGCCCCTGCTGTTGGCCATGGTGTGGCTTGGTAGCAACGGCCTTGATCGCCTGTGGCTAGGGATGGATCAAACGGTGCCAGCTTGGGACCAGAGTAACCACTTATCCTACGGCCTGGAATATTTGCAAGCCCTACGATCGCCGGAGTTTTTGAGCGGGGAATGGTGGCGGAGCTTTTGGATGTTGTCCCCCAAATATCCCCCTTTGACCTACATAGTCAATGCTCCTTTCCAGGGGCTAGGCGGCCCAGGTAGTGATCTGGCTTTACTGAGTAATTGGCTCTGGAGTGGCATTTTAATTCTCTCTGTGTACGGCTTGGGAAAAAAGCTCTTCAGCCGGGAAATTGGTCTGTGGGCAGTGGCCATC…	MVKQILSKSWGVPLLLAMVWLGSNGLDRLWLGMDQTVPAWDQSNHLSYGLEYLQALRSPEFLSGEWWRSFWMLSPKYPPLTYIVNAPFQGLGGPGSDLALLSNWLWSGILILSVYGLGKKLFSREIGLWAVAIMVLIPRLIHSRLIVLLDSPLLAFTLLSFTCLTYWKEAEGRRSQWLWAIAAGVGLGLGLLSKQSIIFYLFFPLVGLGLWSIWTKQWQRLAQLLVGLLASIPLWYPWYRTNWIYLFSTAQNSNAIPATLEGDPPVNTLAAWTYYWQDLPNALSWVWLIPPLVGVILSLLNRFPASLQIPSWREAKPGLLWLGYYYGGTYLICSAIQNKDDRYILPYLPIVAIFLAFGLTRWCGRWLWVRWGTLAITILITLGNLFPIPGSNGIVQALN…	hypothetical protein	hypothetical protein
NC_000911.1:1217156-1219624:-	NC_000911.1	HRIBO	CDS	1217156	1219624	-	sll1772	SGL_RS07540	mutS	2469	823	Yes	0.180026	1.69866	0.939342	0.039108	0.842625	0.440867	5.57	24.07	30.94	14.17	30.94	14.17	1.21	11.94	GTG	TAA	GCGAAGACATAAAGA	GTGAGTGATTCCACCAATTTAACCATTGCGGAAGAGACCTTGGCCCTGTTGGAGTGGCCCAGGCTTTGTCAGCATTTGTCCACTTTTACCCAAACTCCCTTAGGGGCGATCGCCGCCCGCTACTTATTGCCCCCTTCCCAGTGGGAAGAAAGTCGGGAATTGCTAGCCCAAACCCAGGCGGTGGAATCGATTGAAAATTCTCCGGAAAGTAATTGGCATTTTAAAGGTATTGCCGACATTACTGAACCTTTGGCCCGGGTAGAACGGGGCGGTTTGGTTACGGGGCTGGAACTGTTGGCGATCGCCGGCACGTTAGCAGGGGTAAGGAGATTGCGGCGGGTCATCGAAGAACGGGATGACCTGGAAATTTTGCAAACCTTGGTGGCGGAAGTAAGAACC…	VSDSTNLTIAEETLALLEWPRLCQHLSTFTQTPLGAIAARYLLPPSQWEESRELLAQTQAVESIENSPESNWHFKGIADITEPLARVERGGLVTGLELLAIAGTLAGVRRLRRVIEERDDLEILQTLVAEVRTLPELEQAIHHCLGEDGKVAERASPKLGEIRQKLKAVREQIQQKLQKIIQRQSNALQEAVITQRGDRFVLPIKAGYKEQMPGIVHDSSASGNTLYVEPQAIVELGNKLRQARRQEQTEEERILRQLSDQVLEVLLDLEHLLAIATRLDLATARVRYSFWLGAHPPQWLTPGDEKPITLRQLRHPLLHWQAEKEGGPAVVPITLTIDSQIRVIAITGPNTGGKTVTLKTLGLVALMAKVGLYIPAKETVEMPWFAQILADIGDEQSLQ…	DNA mismatch repair protein MutS	DNA mismatch repair protein MutS
NC_000911.1:3500713-3503178:+	NC_000911.1	HRIBO	CDS	3500713	3503178	+	slr0453			2466	822	Yes	0.312821	3.11496	1.71389	0.18975	0.600958	0.395354	18.25	84.54	58.34	27.14	58.34	27.14	11.07	16.31	GTG	TAG	ACGCCAAAATAACTT	GTGGGTTCTACCCTGGTAGGGAAATGTACAAGTCTGGGAGTTTTTTCCATGGTTACATCCCCCTTTTCCCTTAGTCCCTTTGGTCAAGCTAGATCCACCGTCACTGGCAATCCCCTTGACCCGACAGAACTTAACCAAATGCACGGTTTTTGGCGGGCAGCCAACTACTTGGCAGTGGGCATGATTTATCTGCGGGATAATCCCCTTTTGCGGGAACCGCTTCAACCGGAACAGATCAAGCATCGCCTGTTGGGTCACTGGGGTTCTAGTCCCGGCATTAGTTTTCTCTACACCCATCTCAACCGCATTATCAGGAAATTTGACCAGGATATGCTGTACATGGTGGGGCCTGGCCACGGCGCACCAGGCTTTTTGGGGCCCTGCTACCTAGAAGGGAGC…	VGSTLVGKCTSLGVFSMVTSPFSLSPFGQARSTVTGNPLDPTELNQMHGFWRAANYLAVGMIYLRDNPLLREPLQPEQIKHRLLGHWGSSPGISFLYTHLNRIIRKFDQDMLYMVGPGHGAPGFLGPCYLEGSYSRFFAECSEDEDGMKRFFKQFSFPGGIGSHCTPETPGSIHEGGELGYCLSHAYGAAFDNPNLIVVGLAGDGESETGPLATSWHSNKFINPIRDGAVLPVLHLNGYKINNPSVLSRISHEELKALFEGYGYTPYFVEGSDPESMHQAMAATLDHCVSEIHQIQQEARSTGIAVRPRWPMVVMRTPKGWTGPDYVDGHKVEGFWRSHQVPMGGMHENPAHLQQLEAWMRSYKPEELFDEQGTLKPGFKAIAPEGDKRLGSTPYANGG…	hypothetical protein	hypothetical protein
NC_000911.1:2466407-2468872:-	NC_000911.1	HRIBO	CDS	2466407	2468872	-	sll0020	SGL_RS13375	clpC	2466	822	Yes	0.572679	5.42983	3.00125	0.132258	0.788303	0.460281	187.1	759.47	326.71	139.87	326.71	139.87	43.21	110.26	ATG	TAA	TGATGGATTTAGATT	ATGTTTGAACGCTTTACAGAAAAAGCCATTAAAGTAATCATGCTTGCTCAGGAGGAAGCTCGTCGCCTCGGACATAACTTCGTTGGCACGGAACAAATTCTGCTCGGCTTGATTGGCGAAGGGACTGGCGTCGCCGCCAAGGTTCTCAAATCCATGGGGGTTAATCTCAAAGATGCCCGCATCGAAGTAGAAAAAATTATCGGGCGGGGATCGGGCTTTGTGGCCGTGGAAATCCCCTTTACTCCCCGGGCCAAGCGGGTGCTGGAACTTTCCCTTGAGGAGGCTCGGCAACTGGGTCACAATTACATTGGCACCGAACACCTGCTGTTGGGTCTGATTCGAGAAGGGGAAGGGGTAGCTGCTCGGGTCCTAGAAAACCTTGGGGTTGATCTCTCCAAA…	MFERFTEKAIKVIMLAQEEARRLGHNFVGTEQILLGLIGEGTGVAAKVLKSMGVNLKDARIEVEKIIGRGSGFVAVEIPFTPRAKRVLELSLEEARQLGHNYIGTEHLLLGLIREGEGVAARVLENLGVDLSKVRTQVIRMLGETAEVAAGGGSGGRTKTPTLDEFGSNLTQMAAEGKLDPVVGRQKEIERVIQILGRRTKNNPVLIGEPGVGKTAIAEGLAQRIANKDIPDILEEKRVVTLDIGLLVAGTKYRGEFEERLKKIMDEIRQAGNIILVIDEVHTLIGAGAAEGAIDAANILKPALARGELQCIGATTLDEYRKHIERDAALERRFQPVMVGEPSVEETIEILYGLRERYEQHHKLKILDEALEAAAKLSDRYISDRFLPDKAIDLIDEAG…	ATP-dependent Clp protease ATPase subunit	ATP-dependent Clp protease ATPase subunit
NC_000911.1:3011672-3014128:+	NC_000911.1	HRIBO	CDS	3011672	3014128	+	slr0301	SGL_RS15890	ppsA	2457	819	Yes	0.881696	6.76039	3.82104	0.319196	2.09418	1.20669	15.8	48.81	17.92	7.22	17.92	7.22	5.72	15.12	ATG	TAG	TAGGGGTAAATAGAT	ATGGTAAGTTCAGTCGTCGAAAAAACCTCTGTAGCCCATAAAGAAACGGCTTTAATCCTCTGGTTTGAAGAGGTGGGCACCCATGATGTTGGTTTGGTAGGGGGTAAAAATTCTTCCCTGGGGGAAATGATTCAGCAGTTGACCAACAAAGGGGTGAATGTACCTTCTGGTTTTGCCACCACTGCCTATGCTTACCGCTATTTTATCCAAGAGGCGGGTCTGGAACAAAAACTGCGAGATCTCTTTACAGATCTCGATGTGAATGACATGGCCAATCTCCAGGAGCGGGGTCATTTAGCTCGGCAATTAATCTTAGACACCCCCTTCCCCCAAAATTTACAAACGGCGATCGCCGAAGCCTATGGTGCCATGTGTGAACGCTATGGCCAAAAAATGGGT…	MVSSVVEKTSVAHKETALILWFEEVGTHDVGLVGGKNSSLGEMIQQLTNKGVNVPSGFATTAYAYRYFIQEAGLEQKLRDLFTDLDVNDMANLQERGHLARQLILDTPFPQNLQTAIAEAYGAMCERYGQKMGRTGVDVAVRSSATAEDLPEASFAGQQETYLNVHSLSCVLESCHKCFASLFTDRAISYRHHNGFDHFAVALSVGVQKMVRSDLATSGVMFSIDTETGFKNAALITAAYGLGENVVQGAVNPDEYFVFKPTLKEGFKPILEKRLGSKAIKMVYDVGGSKLTKNVEVAEPEREKYCINDEEILQLARWACIIEDHYSGVRGVYTPMDIEWAKDGQTGELFIVQARPETVQSQKSANVIKTYELKDHSQVLATGRSVGAAIGQGKAQVIR…	phosphoenolpyruvate synthase	phosphoenolpyruvate synthase
NC_000911.1:1208749-1211202:-	NC_000911.1	HRIBO	CDS	1208749	1211202	-	sll1775	SGL_RS07495		2454	818	Yes	0.540454	2.81924	1.67985	0.290632	1.60994	0.950284	30.46	80.01	56.36	28.38	56.36	28.38	16.38	45.69	ATG	TGA	CAGCCCCTGCCGCCA	ATGTCCCTGTTAGTCCAGAAACCTGAAATTCCTGCCTGCGCTTGGCAACGATCCATTGGTAAGGATTGGGAAAAGCCCTACACTGTACGCTACGCCAGTAACCTTGACGATGGCCCGGACCATGGTATGCCCCTAGGGGGGTTTGGAGCCGGTTGCATTGGGCGATCGCCAACGGGGAAATTTAACCTGTGGCATTTGGACGGGGGCAACCACATTTTTAAAAATTTGCCTGCTTGTCAATTTAGTGTTTACGAACAGGTGGCAGGGGAAGAAGCCAAAGCCTATGCCATGGCAACGGAAGCCCCTGAAGATGGCAGTTTGGACCGTTGGCAATGGTACCCCAAAGAAAAGGGAGAATACAGCGCCCTCTATCCCCGCAGTTGGTACGAATATAAAGAC…	MSLLVQKPEIPACAWQRSIGKDWEKPYTVRYASNLDDGPDHGMPLGGFGAGCIGRSPTGKFNLWHLDGGNHIFKNLPACQFSVYEQVAGEEAKAYAMATEAPEDGSLDRWQWYPKEKGEYSALYPRSWYEYKDVFKSELICEQFSPVWGGNYQESSYPLAVFDWTVHNPTDKPITLSIMLTWQNSVGWFTNAIKSPTVKLRDDGSPEYEYQPRWGDSTGNFNQWIQDGFRVGCLFNRVQPHEALREGEGQMCIASVSNPSVEVFYHNRWNPSGDGADVWDWFAGNGSLPDIQDETAAEPGEQIAGAICLRFTVRPGKTKKIPFLLAWDLPITEFAQGVTYYRRYTDFYGRNGKNVWSMIRTALKHSDTWRKKIEAWQAPILENPRLPDWLKMSLFNELY…	hypothetical protein	hypothetical protein
NC_000911.1:2881378-2883819:+	NC_000911.1	HRIBO	CDS	2881378	2883819	+	slr0079	SGL_RS15295	gspE	2442	814	Yes	0.65377	5.57239	3.11308	0.305556	3.11729	1.71142	19.77	91.22	30.24	16.37	30.24	16.37	9.24	51.03	ATG	TAA	TCGGTCGCCCCTGCC	ATGGTCTTTTCCTCCGATTCCCCCGAATTTAGCCTCTCCCCTTTTGAACAAGCCCTCATTGAAGCGGGTTATCTTTCCCTTTCCCAAATTCATCAGGCTTTAATGGAGGCGCGTCGCACCGGCATTGCTCTGCCGACTTTGGTGGAAACAATATTGGGGGAATCTTTGCCCGATGAACTACATCGCCAGTACCAAGCTCAGCAACGGTTTGCCCTTTCGGTGATCCATGGGGTGAAGTTTTTTGACCAACATCAGTTAACGACCCTGGCCAACACCGAGGCGATCGCCAGTTTACTGAACCGTTACTTTCCTTTGCCCATCTGCCGTCAGTATGGTTTTTTACCCCTCCATTACCGGGAAAATCCGGGGGCTTTGTTAGTGGTGATGGTGGACCCCAGC…	MVFSSDSPEFSLSPFEQALIEAGYLSLSQIHQALMEARRTGIALPTLVETILGESLPDELHRQYQAQQRFALSVIHGVKFFDQHQLTTLANTEAIASLLNRYFPLPICRQYGFLPLHYRENPGALLVVMVDPSDPEASQFLQRQLAPHRLTLRRRGVTKDDFDNLIDQLYHDPEVQAALNAHRQTEISEDPYDGKATVVEVTEIIEDLPQQIAALQNTPPVAPPPVSAIAENTNDSNPEAKSEGPEVKLANKILILGLREGASEIHIDPQDNRVLVQIRQGGNLRMLLEPLPRELGPKLVARVKTMAHLDTSQTNIPQKARIRKSYNGQSVFFYVNILPSFYGEKILVRVVPHLEKLPDFAQLCGDRQSQESLQRLAQESQGLVVVIGAAYGGKTTTME…	probable general secretion pathway protein E	probable general secretion pathway protein E
NC_000911.1:1367129-1369567:+	NC_000911.1	HRIBO	CDS	1367129	1369567	+	slr0869	SGL_RS08290		2439	813	Yes	0.97535	8.07382	4.52458	0.222958	1.84262	1.03279	26.51	57.97	27.18	7.18	27.18	7.18	6.06	13.23	ATG	TAA	ACTAACGAGGCTTCC	ATGTCCAAGATTGCGCCCCAATGTCAGAATCTCCGTGAGCAAGTTAATCAGTTAATCGAGCTTCTGCGCCAGGAACCCACACTCCGCAGTCAGCAGGACACCAGCATTGTGGAAACGGCCTTAGGAAAGGCACTGTCCCCCCGGTTTGAAATTGTTTTTGCCGGGGCTTTTAGTGCCGGTAAGTCCATGCTGATCAATGCGTTGTTGGAGCGGGAATTGCTTTATAGTGCAGAAGGTCACGCCACGGGGACAGAATGTCATATTGAATATGCTAACGCCAATGAAGAAAGGGTAGTGTTAACTTTTTTGAGTGAAGCGGAAATTCGTCAGCAGGCTTTGATTTTAGCAAAATATCTCAATGTCAATGTGGGGGATTTAAATATTAATCAACCTGAAGCA…	MSKIAPQCQNLREQVNQLIELLRQEPTLRSQQDTSIVETALGKALSPRFEIVFAGAFSAGKSMLINALLERELLYSAEGHATGTECHIEYANANEERVVLTFLSEAEIRQQALILAKYLNVNVGDLNINQPEAVKVVSQYCQKIIAEEGGENKSERAKQANALHLLLIGFEQNRERINTVQNSTYSMDQLNFSSLAEAAGYARRGANSAVLKRLDYFCNHSLLKDGNVLVDLPGIDAPVKEDAERAYRKIESPDTSAVICVLKPAAAGDMSAEETQLLERISKNHGIRDRVFYVFNRIDDTWYNTQLRQRLEGLIQSQFRDNSRVYKTSGLLGFYGSQVKQTNSSTRFGLDSIFATTIKGFDGEEETPQFVSEFNNYCANSGKLLSTAFRVSVNGYETS…	hypothetical protein	hypothetical protein
NC_000911.1:2973268-2975703:+	NC_000911.1	HRIBO	CDS	2973268	2975703	+	slr0104	SGL_RS15710		2436	812	Yes	1.54979	1.82782	1.6888	1.39802	1.11493	1.25648	119.07	82.38	76.83	45.07	76.83	45.07	107.41	50.25	ATG	TAG	CCACCCATTGGTGCT	ATGAAAGCAATTTTTGCCCTCCGCCAAGCAGTGGCGTCCCAACTAAAAAAGTCCACTGCCTCTAGCCATCCTCTCCCCAGGACCACGGCCTCCACTTCCCAAGATGAAACCATTTGGCAAAAAATCCACCGCTCCAGGTTTGTACGCATTGCCCACCCACCAGTGATGTTGGGTATTACAGTGGTGTCCCTCACCGGGGTAGTGGGTTACCGTTTCTATAACCAGCCCCAGCTCAGCGTTGGCACCGAATCTCCCTACACCATTTACGCCCCGGAAGATGGCAGTTTTGTGGACGAAAGAACCACAGAGGAAAAGCGGAAGGAAGTGCGGGCCGGTACCATTCCCCGCCTACAAAGGGATAACGAGTTAACCGCCCAACTCAAACAAGAAAGAAGTCAA…	MKAIFALRQAVASQLKKSTASSHPLPRTTASTSQDETIWQKIHRSRFVRIAHPPVMLGITVVSLTGVVGYRFYNQPQLSVGTESPYTIYAPEDGSFVDERTTEEKRKEVRAGTIPRLQRDNELTAQLKQERSQYLDAINQLRYLAGTFPYIDTKIFTLEQQHLLRSLGPGEWQQLEDYISYGQPLPMASPQLAKLQQLFDQQKATTSPETMAGLLTSIRTAQDRYGRVTARLAEVKADRQITNNQIGALKLDGPTWQTTQQTIIQVHDRILTQGLPAGITAPLLGETVQLHLRNILPPQAHQVAENSLNNLLKDKYNLTVDKEATKNLAEKAVLAMENVKVSAEKNSVIVRAGEVITQEQFVLLDGYGLSQRQVNWQGLLRTAGLVGGALIIFCGVSRR…	hypothetical protein	hypothetical protein
NC_000911.1:1988834-1991266:-	NC_000911.1	HRIBO	CDS	1988834	1991266	-	sll1553	SGL_RS11275	pheT	2433	811	Yes	0.643563	1.86385	1.25371	0.395961	0.674058	0.53501	89.23	156.34	138.65	83.88	138.65	83.88	54.9	56.54	ATG	TAG	TAGAAAAGGAAACCC	ATGCGCATCTCTGTCAACTGGCTGCAATCCCTGGTTGAACTTAATTTGTCTCCAGAAGAGCTTGGGGAATTGCTAACGATCGCCGGTTTGGAAGTGGAAGAAATTGAAGACCGTCGGAGCTGGGCAGCGGGGGTGGTGCTGGGGCGAGTAATTTCCCGGGAAAAACACCCCAATGCCGATAAATTAAGCGTTTGCGTGGTGGATATTGGGACAGAGGAGCCTTCTACCATCGTCTGTGGTGCTGCCAATGTCAGGGCAGATATTTTGGTACCGGTGGCCACCCTGGGCAGTTACTTACCCAAAGTAGATCTAAAAATTAAACCCGCCAAGTTAAGGGGGGTAAAATCTTCCGGCATGATTTGTTCCCTAGCGGAATTGGGTCTGAGTAAGGAGTCTGAA…	MRISVNWLQSLVELNLSPEELGELLTIAGLEVEEIEDRRSWAAGVVLGRVISREKHPNADKLSVCVVDIGTEEPSTIVCGAANVRADILVPVATLGSYLPKVDLKIKPAKLRGVKSSGMICSLAELGLSKESEGIHIFPDLDLPSGSPVGPLLGLDDVILEISPTANRADALSMVGVAREVAALTGGKLSLPEIKAVSVSDQDLPISVTEPQACPTYVGTVIRGVKVGPSPDWLQQRLLAAGTRPINNVVDVTNYVLLEWGQPLHSFDQDKLQTLVGPEGFALGVRFAEEGEKLITLDDQERTLQPQNLLVTANDQPVAIAGVMGGAATEVDENTQNIVLETALFDGVTIRKSSKAINLRSESSTRYERGVNRCELEVALHRAIALMTELAGGTVVRQG…	phenylalanyl-tRNA synthetase	phenylalanyl-tRNA synthetase
NC_000911.1:2927280-2929700:-	NC_000911.1	HRIBO	CDS	2927280	2929700	-	sll0474	SGL_RS15510	hik28	2421	807	Yes	0.480892	2.13115	1.30602	0.452229	1.79918	1.1257	1.51	5.2	3.14	2.44	3.14	2.44	1.42	4.39	ATG	TAA	GGAGCGGTCTTAAGA	ATGGTTCAGGAGAAACCACGTTTTACCCGGCCTCTCCGTTACCAGTTGCTAGCTGGTTGCGCCCTTATTTTGATGATCACCAGCGCCATAGCCGTAGTTTTAACCAGGCAACAATTACAAGAAAAATCAAGAATTAATATTATCACAAGGGCCCAGCGATTAACCGAAGGTTTAGAGTTTGCGGCGGAAGGTTTGGTGGAAACCAAGGATGTTTATCGCCTCAATCGTTTGGCCCAAAACTATGCGACTTGGCCCAACGTACAAACAATTTCAATCGTTGATCCCAATGGCATTCTCATTGCCCATGGTGGAGAAATAAAAATGGTACGGGGAGAAAAATATGCCCAAGTCACACCAGCTCTTTTTCCTATTTTTGAACAGGTTTCCATCAGCGGTATC…	MVQEKPRFTRPLRYQLLAGCALILMITSAIAVVLTRQQLQEKSRINIITRAQRLTEGLEFAAEGLVETKDVYRLNRLAQNYATWPNVQTISIVDPNGILIAHGGEIKMVRGEKYAQVTPALFPIFEQVSISGIPQSLITQIEEEEVVVYALPFNTYSFPEQGESYRDQNSHRRGVAITILSKQELNREVNQGLLLVVGSFIIGIVVILLLLGLLIRYAVLLPLGKLHRALINYDNTEQFNLPPLPSNEIGFLGQTLVQTFNQLQIYQREALEIAERKYVEIAQRYELASQATRVWVWECQPKIHYFEVDPNLITWLGFEQPLEPADGDFFIHLGDRPMFWQAIEQSLEDPTMELSTELRLEAANGEIYHCLLRGQIHQEQGEAFVKIIGTIADITEIKK…	two-component hybrid sensor and regulator	two-component hybrid sensor and regulator
NC_000911.1:2347500-2349911:-	NC_000911.1	HRIBO	CDS	2347500	2349911	-	sll0350	SGL_RS12875		2412	804	Yes	0.260388	2.17784	1.21911	0.14507	3.0155	1.58029	10.59	47.76	40.67	21.93	40.67	21.93	5.9	66.13	ATG	TGA	AGTTCGTCGATTTAA	ATGCCCCCTATTGTTTCCCCTCCCCCTCCTCCGGTACCCATTGAAGTGATCAGTCCGAGGGAGACTGAAGAAATGCTGGCAACTGACGGGGCAACACTTTCCTCGTCCACCCCTCCATCGGCGGATCCGGCGATCGCCCAAGCTTCAGCTAAGGATCTTTACCTTAGCCCCAACTCTGGTTTATCCCTCGGGGGTCCCCCCGCTATCCCAGACGGAAAAATCGGCGATCGGTCTGTGGAAGTACCCATTGCCACGGCCAAGAAAATTATCAGTCAATCCCGGGATGGGGAAATTCAGGAGTATTTGATCACACCCCCCAGCGACTCGGAGCTGGAAGTAATCACCGGGCCCACTGGTGAGGCTGAGCCCGCCATTGAACAGGGCCAAGAGGCGATCGGT…	MPPIVSPPPPPVPIEVISPRETEEMLATDGATLSSSTPPSADPAIAQASAKDLYLSPNSGLSLGGPPAIPDGKIGDRSVEVPIATAKKIISQSRDGEIQEYLITPPSDSELEVITGPTGEAEPAIEQGQEAIGEVLEIDPGASPSPEATENDPEPNQFLDSSPIPATEENDVPIAPEVIELISDHQEFDSNREIVTATGNVTMRFANGLLLADRLRVNLPDRFAVAEGNVTLKRGEQILQGQRFEYFFVLNQGVIYDANGEIYQPSTARDFAQTVPTDFGNPIVSNQSLNDRLAVNQPVTNVVGQEGFSTGIGASTPGAQSASQTETGGQVNRLRFQAEQVDFDADGWRAKKVRITNDPFNPPELEVQAETADYYNVAPEVDELKLTGSRVLLDQTTSL…	hypothetical protein	hypothetical protein
NC_005232.1:18098-20500:+	NC_005232.1	HRIBO	CDS	18098	20500	+	slr6016	SGL_RS01445		2403	801	Yes	NaN	NaN	NaN	NaN	NaN	NaN	0	0	0	0	0	0	0	0	ATG	TAG	CGAGGATAACCGAAA	ATGACCAGACTCTTTAACCTAGAATCATACCCAGAAATCTGTAAGTACACGCAAATTTTTGGGGAATCGTTATCTTTAAATTCTCCTAATATTCCTTTTGCTTATCGAGATTTTTTAAATACCTATAAAGATCGTCATTTTATATCCCCTGCTAATCTTTCAAGTTATTATTCTAATACTATAGTTAGAGGTGAATATAAACCTCAATTCTTAGGTGACCAACTGGATGATCAGCAAGAAGGTGATTTAGTTATTGTTCGTGATATTGATGTGCTGAGCCTGCAAAATTTAGATTGTCCCTATATTTATGCCAGTGCTTATCGCTATTGGAACTACGTCACTCAGCTTCAAAATATTGCTAAAGAGAATAAACCATTAGTTATTTATGATTTAGACAGT…	MTRLFNLESYPEICKYTQIFGESLSLNSPNIPFAYRDFLNTYKDRHFISPANLSSYYSNTIVRGEYKPQFLGDQLDDQQEGDLVIVRDIDVLSLQNLDCPYIYASAYRYWNYVTQLQNIAKENKPLVIYDLDSLPCSYYLPISFQSHPNCSYSIPILDIRTPENYESLRLPFDPSNVYDTICEILAQYVIASDPNFVGIESSYLTQYLKKINVFNIIKNCLISNPNQEIVSLLIDFSNVDNTNLYLKAELPLTIVENIVSSVILVPRLKEIVQNNCEYNFVLISQYNCLSNFRLSLESHFSLPDISHSEFSKIWQEKQSQEFPLYGQFLDLITFQLANQISINVPSESERTNICYEGERKFHTFIGQYTIPSGETKSSFRIDKPQVILPIKINGKLIIK…	hypothetical protein	slr6016_Derived by automated computational analysis using gene prediction method: Protein Homology.
NC_005232.1:72816-75218:+	NC_005232.1	HRIBO	CDS	72816	75218	+	slr6075	SGL_RS01715		2403	801	Yes	NaN	NaN	NaN	NaN	NaN	NaN	0	0	0	0	0	0	0	0	ATG	TAG	CGAGGATAACCGAAA	ATGACCAGACTCTTTAACCTAGAATCATACCCAGAAATCTGTAAGTACACGCAAATTTTTGGGGAATCGTTATCTTTAAATTCTCCTAATATTCCTTTTGCTTATCGAGATTTTTTAAATACCTATAAAGATCGTCATTTTATATCCCCTGCTAATCTTTCAAGTTATTATTCTAATACTATAGTTAGAGGTGAATATAAACCTCAATTCTTAGGTGACCAACTGGATGATCAGCAAGAAGGTGATTTAGTTATTGTTCGTGATATTGATGTGCTGAGCCTGCAAAATTTAGATTGTCCCTATATTTATGCCAGTGCTTATCGCTATTGGAACTACGTCACTCAGCTTCAAAATATTGCTAAAGAGAATAAACCATTAGTTATTTATGATTTAGACAGT…	MTRLFNLESYPEICKYTQIFGESLSLNSPNIPFAYRDFLNTYKDRHFISPANLSSYYSNTIVRGEYKPQFLGDQLDDQQEGDLVIVRDIDVLSLQNLDCPYIYASAYRYWNYVTQLQNIAKENKPLVIYDLDSLPCSYYLPISFQSHPNCSYSIPILDIRTPENYESLRLPFDPSNVYDTICEILAQYVIASDPNFVGIESSYLTQYLKKINVFNIIKNCLISNPNQEIVSLLIDFSNVDNTNLYLKAELPLTIVENIVSSVILVPRLKEIVQNNCEYNFVLISQYNCLSNFRLSLESHFSLPDISHSEFSKIWQEKQSQEFPLYGQFLDLITFQLANQISINVPSESERTNICYEGERKFHTFIGQYTIPSGETKSSFRIDKPQVILPIKINGKLIIK…	hypothetical protein	slr6016_Derived by automated computational analysis using gene prediction method: Protein Homology.
NC_000911.1:758829-761228:+	NC_000911.1	HRIBO	CDS	758829	761228	+	slr2018			2400	800	Yes	0.500472	2.73555	1.61801	0.0706191	1.28021	0.675415	95.39	31.24	190.6	11.42	190.6	11.42	13.46	14.62	ATG	TAA	TTACTCACTAAAGTC	ATGAAAAATAAAGCGATTGGTAATCTTCGTCTGACTCTATTTTTATTCTCTAGAAATCCTAAGAGTAACCCTAGGGGTTATATGCTCTTTTTGGTCGTATCTCTACTAATTACCCTCTCCGGTTTGTTGGTAGCCTATGCTATTTTAGCCAAGCTTCATACCCTATCGTCTAAAGGAACTGCCATAGGAAGTAGTGGTTTCTACGGTGCAGAAGGAGCCCTGAATATGCGGGTAGAAGAATTACGGGAAGTTTTTCTGAGTGATAGAAATCCTAGCGGCACCAGTCCTAGCTCTTTAGACCAATGCCTACAGCAGTCTAACTTGGGGACCGGGGATTTCCGTTGCAAGGTGGCGAGTTTTGCTTCCCCCGATGACGCTACAGCCAATATTCTGGCTTAC…	MKNKAIGNLRLTLFLFSRNPKSNPRGYMLFLVVSLLITLSGLLVAYAILAKLHTLSSKGTAIGSSGFYGAEGALNMRVEELREVFLSDRNPSGTSPSSLDQCLQQSNLGTGDFRCKVASFASPDDATANILAYSYVVPENNGVATQGTVPPGDTFQGLNMLESRYAISAVSAKEGASPDEVIAMTEMVVKSRQIPMFQFAAFYANDLEILPGARMDLEGPVHTNGDLFLGANNNAPNGLTITGQVTVGNQLFNHRKNDNSTYPDGRVRIANGAGTLINLLSGGTGGTTQTTAAMNPANVNASWGSQVQLGVEALSIPTISTLGVGGNYAQQADINFVYAPEKTGVNVPGIGTTIIPFDVTATKRDALGAGTSTTLTNAQLASLRQPVLATGAAVTAGVC…	unknown protein	unknown protein
NC_005230.1:3041-3364:-	NC_005230.1	HRIBO	CDS	3041	3364	-	sll7006	SGL_RS00655		324	108	Yes	7.99902	7.69647	7.84775	2.57048	4.46988	3.52018	7134.89	4479.19	891.97	581.98	891.97	581.98	2292.79	2601.38	ATG	TAG	TAATAATAATTAAAT	ATGAGTCGTTTAACCTTAAGATTACCCGAAAGCTTACATCAACAATTAAGTCATCAAGCCTCACAAGAGGGAGTATCCTTAAATCAATATATTGTCTATGCCCTAACAAGACAAATTACCCAGCAATATCTTGTTAAGCCTGTTTTATCTGAAGATATAGAAAAACAACAGGCTTCATTTCTTAGTCTTCTTAACAATTTAGGTACAGCCACATCAGAAGATATTCAGTTAGTCTTAGAAGAACGGGAAATAGTAGCATCTGAAGATGAATTAACCCCAGATATTGTGGCTCAATTCCAGCAAAAAATAAAGACAAATTCTTAG	MSRLTLRLPESLHQQLSHQASQEGVSLNQYIVYALTRQITQQYLVKPVLSEDIEKQQASFLSLLNNLGTATSEDIQLVLEEREIVASEDELTPDIVAQFQQKIKTNS	unknown protein	ORF_ID:sll7006
NC_000911.1:1022278-1024653:-	NC_000911.1	HRIBO	CDS	1022278	1024653	-	sll1143		pcrA	2376	792	Yes	0.328812	2.48095	1.40488	0.197336	1.03844	0.617886	26.91	74.23	81.84	29.92	81.84	29.92	16.15	31.07	ATG	TGA	ACTGTTACTGTGCCC	ATGACTGTTGTCCCCGACTACCTTGCCCACCTCAATCCTTCCCAACGGCGGGCGGTGGAGCATTTTTGTGGCCCTCTTTTGGTGGTGGCCGGGGCCGGCTCAGGGAAAACTAGGGCACTAACCTACCGCATTGCCCATCTAATTCGTCAGCATCGCATCAATCCGGAAAATATCCTGGCGGTAACCTTTACCAATAAAGCCGCCAAGGAAATGAAGGAACGTTTGGAAAAGATTTTTGCCCAAGCCTGGGCCCAACAGGAATTTAGCCAACGGTGGGAATTGTTGGGGAAATATGAACAAAAACAGTTGCTTTCCAGGGTGTACAAAACAGTTACGAAACCCCTCTGGATTGGCACTTTCCACAGTCTATGTTCTCGTATTCTCCGCTACGACATTGAT…	MTVVPDYLAHLNPSQRRAVEHFCGPLLVVAGAGSGKTRALTYRIAHLIRQHRINPENILAVTFTNKAAKEMKERLEKIFAQAWAQQEFSQRWELLGKYEQKQLLSRVYKTVTKPLWIGTFHSLCSRILRYDIDKYQDSSGRRWTKQFSIFDESDVQSLFKTIVTKDMDLDEKQFNPKSIRYQVSNAKNLGQSPETYLRENPSYKGRVIAEVYQAYQNQLAANNALDFDDLILIPTRLFQQNESVLGYWHRKFNHILVDEYQDTNRIQYDLIRLLSTNGEERQSEWDWRGRSTFVVGDADQSIYSFRMADFTILLNFQEDFGDRLLDGETTTMVKLEENYRSRENILQAANHLIEHNSQRIDKILKATRSGGDDIILYQADDERDESRFVINKILSLRKN…	ATP-dependent helicase PcrA	ATP-dependent helicase PcrA
NC_005230.1:5340-6284:-	NC_005230.1	HRIBO	CDS	5340	6284	-	sll7009	SGL_RS00670		945	315	Yes	20.3728	15.2365	17.8046	13.6369	8.34638	10.9916	1093	829.17	53.65	54.42	53.65	54.42	731.62	454.21	ATG	TAA	TGTTTGAAGACTAGT	ATGAAATTTCAATACAATTCCTTAACCTTTGCCATTGAAGTCCTCAAAGCCTTGGCAAAAGAGCCTTGTTATCGCAAAAATCTCACAGAGCAATTAGAACTTTTTCTAGAACAGCATCAGCAACCTGCCGATGATGTTGCCCAAAAGCTGACTCGTACTATCCGAAAACTGCGGGATTGTGGCTTTGAGATTGAGAGTGCGCCCCATCGTCCCTATGTCCTCAAGAAGTCAAATTTTCCCGTTATTCTCTCCGCAGATCAGCGTCAAGCTCTTTATTTAGCAACCCATCTCCTTGAACAAATGGGTTTTTCTCAACAAGCTAGTCAACTTCAAGATATTTGTCCTCTCACAGAAGGCGATCGCCCAAGGCATCTCCGAGCAGATTTCAACCCCCCAGTA…	MKFQYNSLTFAIEVLKALAKEPCYRKNLTEQLELFLEQHQQPADDVAQKLTRTIRKLRDCGFEIESAPHRPYVLKKSNFPVILSADQRQALYLATHLLEQMGFSQQASQLQDICPLTEGDRPRHLRADFNPPVDYSDIKTKEIITNLQKRLETACRFTIRYRNSLGKEALWDLDRSELRLHNGSLYLFAYVPDILTQRIQKRPNIEQNVLFRIDRILSVNPSSNIHWLLSSFPTLKVQYRMIGSLSKYKPRRHNETVINRNVEQNYVEIETNEDCLFWFRQRILQYGSNVQILTPQWLHQEIVEEHLKAIQSTK	unknown protein	ORF_ID:sll7009
NC_000911.1:3078838-3081210:-	NC_000911.1	HRIBO	CDS	3078838	3081210	-	sll0778			2373	791	Yes	0.723949	3.18672	1.95534	0.234004	2.21162	1.22281	3.96	7.68	5.47	2.41	5.47	2.41	1.28	5.33	ATG	TGA	TTTCAATAATTTGAA	ATGGTCATGAATCAAAATAATAGACCATACATTATTGTCACTAATCAAGGTCAAAGCTTACCCCCTTTTGAATTAACTAAAAGTAAACATATTTTAGGTCGAGATTCCCAATTTGCCGACCTGATAGTCCCCACTGATTGGAGCATTATTAGTCGTTGTCAAGCTACTTTAGTAGAAGATCAAGGTAATTACTTTATTTATGACGGCGATCGCCTCAATCCCAGCAGTAACAAGCTATTTATTAATCATCATTTAATCACCCATGATATTGGCTACCCATTACAGAATGGAGATGTTATTAAGATTGGACAAAATATTAATATTCTTATTACTATTAAATATTTTACTCCCAATGGCTCTAGCCCTACCAATTTAACATCGCTATTATCCATCAATTTA…	MVMNQNNRPYIIVTNQGQSLPPFELTKSKHILGRDSQFADLIVPTDWSIISRCQATLVEDQGNYFIYDGDRLNPSSNKLFINHHLITHDIGYPLQNGDVIKIGQNINILITIKYFTPNGSSPTNLTSLLSINLKQKSVVIGRDETANLQLLSSAVSRQHAVLDYLEPNTYLLHDYSTNGVYVNGTKVNGKILINTAAIIKIVPYTLVLQNDQLFIADTGDNIRLDARNIVRTVQGNQSEEITLLNQISLPIEPGQLVALVGGSGAGKSTFMRTLLGIEPTTSGTVYLNGEDLRNNFNLYRNQIGYVPQKDIIHSSLTVEEALRYAAKLRLPQDADIDEIVEKTLGQIEMQERRHVLVKKLSGGQLKRVSIGVELLVDPKLFFLDEPTSGLDPGLDKKMM…	ABC transporter, ATP-binding protein	ABC transporter, ATP-binding protein
NC_000911.1:1868645-1871002:+	NC_000911.1	HRIBO	CDS	1868645	1871002	+	slr1277		gspD	2358	786	Yes	0.594343	5.13332	2.86383	0.221365	1.18543	0.703396	55.47	368.47	93.33	71.78	93.33	71.78	20.66	85.09	GTG	TAG	GATTTTAATTGGTGT	GTGAGGAGCAATTCTGTGAAAAATTTTCGGTTTTGGTTAACAACGGAAATAGCGACCTGTTGCTTGTTGGCCCTAGCGCCTGCCCAGGCAGAAACGGTTTCCCAGTCAAATACTTTGGATGGAGATTTGCGGACGGCGATCGCCGGTGACTCAAGTCGAGATTGGCTACAGTTTGAAAAGAGTTTGGAGCAGTCTCTCAAGCAAAAAGAAGAAATTGATTCTTGGAAACCATCATTGGAGTTGATGCAGGCTAAATCCCTTGTCAAACCAGGGCAAAAGTTGACGAATATTGAGTTGCTGGTGCAGGAGTTGGAAGCCTTATCCGACCCACTGGCATTAAATTTTCCAGAACCGAACCAGACCAGTGTTGCTCAAATGGCTCCCCCCAGCCGCCCTATG…	VRSNSVKNFRFWLTTEIATCCLLALAPAQAETVSQSNTLDGDLRTAIAGDSSRDWLQFEKSLEQSLKQKEEIDSWKPSLELMQAKSLVKPGQKLTNIELLVQELEALSDPLALNFPEPNQTSVAQMAPPSRPMPPPPAGSGQVMFPNPEIIIQQQGGVPQRGASPQVGNPSILSPAVPVAPVRSRAVPPPVGDLAISNINASFDMIDLGQRGQVNVPSLVLREAPAREVLAVLTRYAGMNLIFTDNQNNEGTPTPGTPPGGQVAPPQAQSTITLDIQNESVQDVFNYVLMASGLKASRRGNTIFAGANLLPSARNIITRTIRLNQASAESVASTLASQGAEVNILFEGQEDVQLAENAPPRVIKQPPTLVPLTVQKPANDSSVLILEGLVVSTDPRLNT…	pilus assembly protein homologous to general se cretion pathway protein D	pilus assembly protein homologous to general secre tion pathway protein D
NC_005229.1:32865-33350:-	NC_005229.1	HRIBO	CDS	32865	33350	-	MYO_RS16705	SGL_RS00145		486	162		0.462213	3.41921	1.94071	0.282215	0.894419	0.588317	42069.1	22862.9	91016.8	6686.59	91016.8	6686.59	25686.3	5980.61	ATG	TAA	TAGGTAGTTATCATA	ATGAACTCAGAAAATCTCGCGGCTCTTAAACCCTATCTCAGCTTTTTTCACCCCATTACCATGTGGGCTTTGCTAGCCCTGGCGATCTATACCCTATACCTCGGCATACAGGTTCGACGGACAAGGCTGGCGGAGGGAGAGCCGAAAAAGGAACTGATTAAGGGGCGGTTTGCCATTCGTCACCATCAAATTGGCTCTATGTTTTTGGCGCTAATCGTCATGGGGGCGATCGGGGGCATCACGGTTACTTACATCAACAGTGGCAAAATTTTTATTGGCCCCCACCTGTTTGCGGGGTTAGGAATAGTAGGGTTAGTTTCCACTTCCGCAGCGTTGGTACCCTTTATGTAAAAGCATAATTGGGTTCGCAATGTGCACGTTTCTTTGAATGTGGTTCTG…	MNSENLAALKPYLSFFHPITMWALLALAIYTLYLGIQVRRTRLAEGEPKKELIKGRFAIRHHQIGSMFLALIVMGAIGGITVTYINSGKIFIGPHLFAGLGIVGLVSTSAALVPFM	hypothetical protein	internal stop_Derived by automated computational analysis using gene prediction method: Protein Homology.
NC_000911.1:777066-779411:-	NC_000911.1	HRIBO	CDS	777066	779411	-	sll1910	SGL_RS05500	zam	2346	782	Yes	0.766605	6.03625	3.40143	0.219906	4.37879	2.29935	37.51	133.22	48.93	22.07	48.93	22.07	10.76	96.64	ATG	TAG	TCAGGATTCAGTTTC	ATGGATTATTCGATCGCCACACTTTTGTCCTATTTTGTTGACGACAAATTAGTAGCGGGTAAGTTTCTCGAAAAAAAACTAGGTTGTGAGAGTCCTGAGGCCATAGAAGCCCTACAGATTGCCCTCGATGCCCTGGAAAAAATGGGGGTACTAGTCAAAGAAAGGGGTAAATATAAGCGGGTGACCAGGGAAGATGTGGTGGAAGCCCGGCTGCGTTGTTCCAGTAAGGGTTTTTGTTTTGCCATCCAAGACGATGAAGATGCCACCGATATTTACGTCCGGGAAGGGAATCTCAGCAATGCCTGGAACGGCGATCGGGTTTTGGTCAAAGTGATTAAGGACGGTACCCGCCGCAAGTCCCCCGAAGGAGCAGTCCATCTCATTCTCGACCGAGCCAAT…	MDYSIATLLSYFVDDKLVAGKFLEKKLGCESPEAIEALQIALDALEKMGVLVKERGKYKRVTREDVVEARLRCSSKGFCFAIQDDEDATDIYVREGNLSNAWNGDRVLVKVIKDGTRRKSPEGAVHLILDRANPSLLAQVKKSEDNYRAVPLDDRLLFELELQDKEQNLGEAVDHLVHVSVLRYPIAQHPPLGEVTKVLGSDAEAAADTDIVSCKHDLPLGWTPEAIEALQSLPKVIEPGELKKRQDYRKLQLVTFGDGPRGETLPWQEVALSLESQANQWQVGIHITDIAHYIAEDSLLDQLARKRGTTVYLEEQICPLFPEGLIGRCSLIPDEDRLALSFFLTVDDRGEVTGFEYHSSVVKVDHQLDFSEVQTALADIESVSGELKPYGGLLQELFF…	protein conferring resistance to acetazolamide Zam	protein conferring resistance to acetazolamide Zam
NC_000911.1:2254112-2256454:+	NC_000911.1	HRIBO	CDS	2254112	2256454	+	slr1950	SGL_RS12475	ctaA	2343	781	Yes	0.477562	1.26945	0.873507	0.694949	1.06162	0.878284	45.76	48.62	95.82	38.3	95.82	38.3	66.59	40.66	ATG	TAA	TTTATTAACCCCACC	ATGGTTCAACTTTCCCCGACCCCTGCATCAACCCTGACTTACAAAGACGCAAATGGGCAAAATCGTACTGCTAGCTTGACCCTCGACGTGGGGGGCATGAAATGTGCCGGTTGTGTGGCGGCGGTGGAAAGACAATTGGATCAACTAACGGGAGTGACGGACAGTTGCGTCAATTTGGTCACAGCGGTGGCGGTGGTGCGTTATGAACCGGAAAAGATTCAACCCCAGGCGATCGCCGAACATTTGAGTCAGCGGGGATTTCCCAGTCAGATTCGTCATGGCCATGGCGCTATCCCTGCGACGATAGGGGAAAAAGAGACAAGGGAAAACGTTAACTGGGGTTTGACCATTGCCCTGGTGTTACTGCTCCTATCGGGGTTGGGGCATCTAAGCCATTTT…	MVQLSPTPASTLTYKDANGQNRTASLTLDVGGMKCAGCVAAVERQLDQLTGVTDSCVNLVTAVAVVRYEPEKIQPQAIAEHLSQRGFPSQIRHGHGAIPATIGEKETRENVNWGLTIALVLLLLSGLGHLSHFGGPMIPFFHHPIFHWSLATLAIAIPGREIFLDGWRGLRFGHANMNTLVALGTGSAYLTSCIAWAWPGLGWECFFDEPVMLLGMLLLGRTLESKARQKAKSALTELLALQPSLARLVGRGEDQGETGIEIPVEQVRVGEWVQVLPGEKIPVDGILVAGKTLVDESLLTGESLPVAKNVDDAVIAGAWNQSGAIIIAATHIGAETTLARIIQLVETAQTQKAPMQRLADQVAGWFAYGVLAIALVTLGFWAMVGQSLFPEMVADTGLS…	copper-transporting P-type ATPase CtaA	copper-transporting P-type ATPase CtaA
NC_000911.1:600942-603257:-	NC_000911.1	HRIBO	CDS	600942	603257	-	sll1932	SGL_RS04685	dnaK	2316	772	Yes	0.466174	2.88402	1.6751	0.232851	0.736105	0.484478	59.26	191.47	127.12	66.39	127.12	66.39	29.6	48.87	ATG	TAA	AGCAAAGAAAACAAC	ATGGGAAAAGTCGTCGGAATTGACCTTGGAACTACCAATTCAGTTGTGGCCGTCATGGAAGGCGGCAAACCCATTGTCATCGCCAATGCGGAAGGCATGCGTACTACCCCCTCCGTGGTGGGGTTCAACAAAGAAGGGGAATTGGTGGTGGGTCAGATGGGCCGGCGGCAAGCGGTGCTCAATCCCCAAAATACTTTCTATGGCGTCAAACGTTTTATGGGGAGGCGTTACACTGATTTAACTCCAGAATCTAAACGAGTAGCCTACACCATCCGGCGGGATGACCGGGATAACATTAAAGTGCGTTGTCCCCGGCTGAAAAAAGACTTTGCCCCGGAAGAAATTTCCGCCATGATTTTGCGGAAGTTGGCCGAAGAAGCCAGCCGCTACCTGGGGGAA…	MGKVVGIDLGTTNSVVAVMEGGKPIVIANAEGMRTTPSVVGFNKEGELVVGQMGRRQAVLNPQNTFYGVKRFMGRRYTDLTPESKRVAYTIRRDDRDNIKVRCPRLKKDFAPEEISAMILRKLAEEASRYLGEKVTGAVITVPAYFNDSQRQATRDAGKIAGLEVLRIINEPTAASLAYGLDQGRIQKILVFDLGGGTFDVSVLEVGDGIFEVKATSGDTQLGGNDFDRRIVDWLAEKFLEAEKVDLRQDRQALQRLTEAAEKAKIELSGVGTTEINLPFITATEDGPKHLETQLSRSEFEDLCGDLVTRLQRPVKRVLKDAGLSPVQIDEVVLVGGGTRMPMVKGLVRSFIDREPNENVNPDEVVAIGAAIQAGILDGEVKDILLLDVTPLSFGLETI…	DnaK protein	DnaK protein
NC_000911.1:867257-869569:-	NC_000911.1	HRIBO	CDS	867257	869569	-	sll1121	SGL_RS05955	sll1121-as4	2313	771	Yes	0.186422	1.91533	1.05088	0.100723	1.07153	0.586128	3.35	13.12	17.97	6.85	17.97	6.85	1.81	7.34	ATG	TAG	CAATTTGTTGCGCCA	ATGGGTAGATTGAGGGGAACACTAACGTCGGCGATCGCCATGAATCAAACTTCCCTGAACCTAGAGCAACTCCGCCAGAGTTTACGCAGCAGTCAACGACCTCTGGCGGATTGGCATGGGGGAGAGATGGCCGTTTCCGCCGTGCCCGGGGCTGGCAAATCCCATAGTCTTTCTGTGGCGGCGGCGATCGCCATTGCCCACCATGGTTTACATAACCAGGAAAAATTGCTGATTGTGACCTACACCCGTTCAGCGGCGGCGGCCATCAAAGGCAAGGTTAATCAACGTTTACGGGCCTTGGGCTTACCCAGTTTGGGATTTACGGTGCAGACCCTCCACGGTTTAGCCCTCAGCATTGCCCTACGCCATCCGGAAGTATCGGGGCTAGACCCGGAGCAA…	MGRLRGTLTSAIAMNQTSLNLEQLRQSLRSSQRPLADWHGGEMAVSAVPGAGKSHSLSVAAAIAIAHHGLHNQEKLLIVTYTRSAAAAIKGKVNQRLRALGLPSLGFTVQTLHGLALSIALRHPEVSGLDPEQQTLVSPQKGHRLIKDAVEQWRRENPKTYQTLVEAGNFDGETTETLRRQAVLSTEVLPELTKTVVAEAKSSGLSPQAVADMGRIAPGSELLLMGAGLFKHYQALMEAKNWIDYNDMILAALRVLEDPHLCRQWQEQFFGVFEDEAQDSSPLQEKLLTKLAQNADGTIRLIRVGDPNQAINSSFTPADPVYFDQFCQRCQALGSFATMDQAGRSNLQVIAAANFLLEWVNQDWQARFNSGPKGDATLPFRPQAIRPVEPGDPQPNPPA…	hypothetical protein	hypothetical protein
NC_000911.1:1464954-1467266:-	NC_000911.1	HRIBO	CDS	1464954	1467266	-	sll1608	SGL_RS08735		2313	771	Yes	0.296004	1.93885	1.11743	0.206216	2.15468	1.18045	6	21.56	20.27	11.12	20.27	11.12	4.18	23.96	ATG	TAA	CCTTTCTATCCATCC	ATGACTTTCTCCTTCCCCATGGCCCGTTGGCTAGAGCAATGGCAAGCCCGTCTGCAAAACTTGCCCGAGTCTAAAACGGAGGAATCGATTGTTTTCCGCATTTTGGTGCAGTTAATGGTGATTGTGGGCATTGTGGCCACAGACGTAGCGGCCCAAACCACCTGGAGTTTATGGGCCATTCCCCTCAGTGTCATTGGCTCTTGGTGGAGTTGGCGTCAAAGAAAAAAGAAGAATATTGCCCTCAAATTTCTGCTGGCGATCGCCATGGTGGCCATGTTGTTTGTCTTTTTGGGCAACTTGGTGGAAAATCTCAATGCTAGCCAGGTGGCCCTAGCGGGATTATTGGTGCAACTACAGGTATTGCACAGTTTTGATTTGCCTCAGCGGAAAGATTTAGGC…	MTFSFPMARWLEQWQARLQNLPESKTEESIVFRILVQLMVIVGIVATDVAAQTTWSLWAIPLSVIGSWWSWRQRKKKNIALKFLLAIAMVAMLFVFLGNLVENLNASQVALAGLLVQLQVLHSFDLPQRKDLGYSMVIGLILLGVAGTLSQTLAFAPWLLLFLAVAIPTLVLDYRSRLGLEEIPFSLPFWKSAEKARRSERTEYSPLVPKKLFALLAVTLAFGLLLFALMPRFPGYRLQSFPVSSPGEMQQQTFEGQNQDINNPGYRRGNGTGTGGEGDGSEPGQVDDTFYYGFNSRMNQNLRGEMTKQLVLRVRSQAPGFWKALSFDRYTGQGWEISDNEKITTVERSPWSYRFVLDNIDSFLETENVVQTYTAVEDLPNVIPSLYHPRFLYFPTREV…	hypothetical protein	hypothetical protein
NC_000911.1:2331505-2333817:-	NC_000911.1	HRIBO	CDS	2331505	2333817	-	sll0158	SGL_RS12820	glgB	2313	771	Yes	0.483257	4.89355	2.6884	0.101795	1.20289	0.652343	36.08	176.07	74.66	35.98	74.66	35.98	7.6	43.28	ATG	TAG	AATCACCATAGCCGA	ATGACCTACACCATCAACGCTGACCAAGTCCATCAGATTGTCCATAATCTTCACCACGATCCCTTTGAAGTGTTGGGCTGCCATCCCCTCGGGGACCACGGCAAGGTCAATCAATGGGTCATTCGTGCCTATTTACCCACGGCTGAAGCGGTAACGGTGTTGCTTCCCACCGATCGCCGGGAAGTGATTATGACCACGGTCCACCATCCCAACTTTTTTGAATGCGTGTTGGAGTTGGAAGAACCGAAGAATTATCAATTAAGAATTACCGAAAATGGCCACGAAAGGGTAATTTATGACCCCTATGGTTTTAAAACTCCCAAACTGACGGATTTTGACCTCCATGTGTTTGGGGAAGGCAACCACCACCGTATTTACGAAAAACTCGGTGCTCACCTG…	MTYTINADQVHQIVHNLHHDPFEVLGCHPLGDHGKVNQWVIRAYLPTAEAVTVLLPTDRREVIMTTVHHPNFFECVLELEEPKNYQLRITENGHERVIYDPYGFKTPKLTDFDLHVFGEGNHHRIYEKLGAHLMTVDGVKGVYFAVWAPNARNVSILGDFNNWDGRLHQMRKRNNMVWELFIPELGVGTSYKYEIKNWEGHIYEKTDPYGFYQEVRPKTASIVADLDGYQWHDEDWLEARRTSDPLSKPVSVYELHLGSWLHTAYDEPVKTLHGEGVPVEVSEWNTGARFLTYYELVDKLIPYVKELGYTHIELLPIAEHPFDGSWGYQVTGYYAPTSRFGSPEDFMYFVDQCHLNGIGVIIDWVPGHFPKDGHGLAFFDGTHLYEHGDPRKGEHKEWG…	1,4-alpha-glucan branching enzyme	1,4-alpha-glucan branching enzyme
NC_000911.1:3014390-3016696:+	NC_000911.1	HRIBO	CDS	3014390	3016696	+	slr0302	SGL_RS15895		2307	769	Yes	0.187706	1.44486	0.816285	0.0610561	0.98115	0.521103	4.55	15.33	24.24	10.61	24.24	10.61	1.48	10.41	ATG	TAA	TCGCCCGGCAAAACC	ATGAGCGATCGCCACAAAACCAAAGCTCAATTACTCCAGGAAATGGAGAGGTTGAGGGCGGATTTAGCAGATATTCAACGCATTGCTAAATTAGGCTTCTGGCGGTTTGACATTGCTTCCGGTGAGATCACCTGGTCAGCAGAAACTTACCAACTATTTGGTCTAGAGCCCCATCAATTTTCCCCTAGTTATGACTGGTTAGTCCAGACCATTCAGCCCGAATTTAGAGAACTGCACCAGAGTATTGCTGATAAGGTTATTGCCACCGGAAAAACTCAAACCATAGAGTATGCAATAACTCGGGCCGATGCTTCTATGGGGTGGATTTGGGCCAGGATTGAAGCGATTATCGATGACCGGGGCCAAGTCAATGGATTGCAAGGGGTGGCCATGGACATC…	MSDRHKTKAQLLQEMERLRADLADIQRIAKLGFWRFDIASGEITWSAETYQLFGLEPHQFSPSYDWLVQTIQPEFRELHQSIADKVIATGKTQTIEYAITRADASMGWIWARIEAIIDDRGQVNGLQGVAMDISDRKMAEIALRESEARFRNLFESNIVGMFFASNQGEIFDANDRFLQMIGFTKEELDLGLVHWDRLTPPEYDQKDQEIIARLRNHETPEPWQKEYYRKDGSRIPVLVGVASIDVELEYTVCIVVDMTEQQKTLDQCRLTEAKLAELNAQLEQRVLERTKSLQENEDRLKLAFNAANMGYWDLDLLTNGIVWSESLEQMMGLKPGSFDGDLEKVAQMMHPDDRGIVLKALEQSIHNDEPYDLEFRFIKPDGTLRWAASQATVIRDQNN…	unknown protein	unknown protein
NC_000911.1:78467-80773:-	NC_000911.1	HRIBO	CDS	78467	80773	-	sll1056		purL	2307	769	Yes	0.419561	2.79109	1.60533	0.283068	0.735021	0.509044	30.8	87.11	73.41	31.21	73.41	31.21	20.78	22.94	ATG	TAA	TTTACCCTCCTTGCC	ATGACCGCCCCCTTTACTCCCGCCGAAATCGCTGCCGAAGGTATCAAACCCGAAGAATACGAAGATATTGTGCAACGGCTCGGCCGCCATCCCAACAAAGCTGAACTGGGAATGTTCGGTGTCATGTGGTCAGAACATTGTTGTTATAAAAATTCCCGTCCCCTACTGAGTAACTTTCCCACCGAAGGAGAACGCATTTTAGTGGGGCCTGGGGAAAATGCCGGGGTCGTAGATTTGGGGGATGGCCTGAGATTGGCGTTTAAAATCGAATCCCATAACCATCCTTCCGCAGTGGAGCCATTCCAGGGAGCCGCCACCGGAGTAGGGGGGATTCTGCGGGATATTTTCACCATGGGAGCGAGGCCGATCGCCATTTTAAATTCCCTACGGTTCGGTAAT…	MTAPFTPAEIAAEGIKPEEYEDIVQRLGRHPNKAELGMFGVMWSEHCCYKNSRPLLSNFPTEGERILVGPGENAGVVDLGDGLRLAFKIESHNHPSAVEPFQGAATGVGGILRDIFTMGARPIAILNSLRFGNLDDARNRRIFTGVVDGISHYGNCVGVPTVGGEIYFDPAYSGNPLVNAMALGLMETEEIVKAGASGIGNPVLYVGSTTGRDGMGGASFASAELTDQSMDDRPAVQVGDPFLEKSLIEACLEAFKSGAVVAAQDMGAAGITCSTAEMAAKGGVGIELDLDKIPVRETGMVPYEYLLSESQERMLFVAQPGREQELIDIFHRWGLQAVVAGQVIADPIVRIFFQGGIAAEIPATALADNTPIYHRQLLDQAPDYAQQAWQWQESDLSPA…	phosphoribosylformyl glycinamidine synthetase I I	phosphoribosylformyl glycinamidine synthetase II
NC_000911.1:2432459-2434762:-	NC_000911.1	HRIBO	CDS	2432459	2434762	-	sll0322	SGL_RS13225	hypF	2304	768	Yes	0.844789	1.95618	1.40048	0.788618	1.18526	0.986938	11.43	9.82	13.53	5.02	13.53	5.02	10.67	5.95	ATG	TAA	AATGGAAGTAGAATA	ATGTTAAAAACCGTTGCCATACAGGTCCAGGGAAGGGTGCAAGGAGTGGGTTTTCGTCCCTTTGTTTATACCCTTGCCCAGGAAATGGGACTGAATGGTTGGGTGAATAATTCCACTCAAGGAGCTACCGTTGTCATTACCGCCGACGAAAAGGCGATCGCCGACTTTACGGAGAGATTAACGAAGACATTACCTCCCCCTGGTTTGATTGAACAATTAGCCGTTGAACAGTTACCGCTGGAAAGTTTTACTAACTTTACTATCCGCCCCAGTAGTGATGGCCCTAAAACTGCGAGTATTTTACCCGATTTATCCACTTGTTCCGCCTGCTTAACAGAACTATTTGACCCTAGCGATCGCCGTTATCTTTACCCCTTTATTAACTGTACCCATTGCGGT…	MLKTVAIQVQGRVQGVGFRPFVYTLAQEMGLNGWVNNSTQGATVVITADEKAIADFTERLTKTLPPPGLIEQLAVEQLPLESFTNFTIRPSSDGPKTASILPDLSTCSACLTELFDPSDRRYLYPFINCTHCGPRYTIIEALPYDRCRTTMARFRQCTDCEREYKQPGDRRFHAQPNACPRCGPQLAFWNRQGQVIAEANEALNFAVDNLKVGNIIAIKGLGGFHLCCDATDFEAVEKLRLRKHRPDKPLAVMYGNLGQIVEHYQPNNLEVELLQSAAAPIVLLNKKKQLILVENIAPGNPRVGVMLAYTPLHHLLLKKLKKPMVATSGNLAGEQICIDNIDALTRLQNIADGFLVHDRPIVCPVDDSVVQIVAGKPLFLRRARGYAPQPITLPKPTQK…	putative hydrogenase expression/formation prote in HypF	putative hydrogenase expression/formation protein HypF
NC_000911.1:1928323-1930626:+	NC_000911.1	HRIBO	CDS	1928323	1930626	+	slr1164	SGL_RS10995	nrdA	2304	768	Yes	1.10202	5.77103	3.43652	0.182156	1.02387	0.603015	26.68	106.36	24.21	18.43	24.21	18.43	4.41	18.87	ATG	TAG	TGACTGTCTTTTTCT	ATGCATCCCACCCTCATCAGCGCCCCTATCAGCTCCTCCGCCAATGATGCCCATGCCGGCACTAGCCAGGGTTCCCATCAGGGACATCGCATACAAGTGATCCGTAGAGATGGCTCCTCAACTCCCCTAAATATTGGCAAAATTCGGGCAGTGGTGGACTGGGCTTGCCTTGGGTTGGAAGTGAACTCCATCGCCCTAGAAGCAGGGCTAACGACTAGGTTGAGAGAGGGGATTAGCACTAGAGAGATTCAAGATAATTTAATTAGCTGCGCTCTGGAAATGTGCAGTCCCAACGAACCAGACTGGCGCTACGTGGCTGGCCGTTTACATGTTTGGAGTCTGTGGAAAGATACCCTAGTGCGTCGGGGATATCAGTATGGGCAGTATCTACGCACGGTA…	MHPTLISAPISSSANDAHAGTSQGSHQGHRIQVIRRDGSSTPLNIGKIRAVVDWACLGLEVNSIALEAGLTTRLREGISTREIQDNLISCALEMCSPNEPDWRYVAGRLHVWSLWKDTLVRRGYQYGQYLRTVQTKVTNGEYDSRILTYSEGELQEAGCWINSDWDTDYDYAGAVLLTSRYLLPNELPQEALLTCALLLASVEAPDRRLQWARRFYESIAARRISLATPILANLRVPGGSLTSCFIVAMEDNLESIFGEITNAARISKNGGGVGVNVSRIRATGSWVMGKPNASGGVIPWTKLLNDTAIAVNQGGRRAGAVTVGLDVWHLDVPEFLEMQAENGDQRRKAYDIFPQLILPDEFMRRVINKEDWTLVDPYEVREKMGIELAELWGEQFEGA…	ribonucleotide reductase subunit alpha	ribonucleotide reductase subunit alpha
NC_000911.1:186601-188898:-	NC_000911.1	HRIBO	CDS	186601	188898	-	sll1040			2298	766	Yes	0.201179	1.37167	0.786425	0.179808	1.78208	0.980945	2.73	11.33	13.57	8.26	13.57	8.26	2.44	14.72	ATG	TAG	TACAAAAACCCCAAC	ATGCCTATGGGTTGCCGATTTGCCACCGTCAAGCGTCTGATTCTGCTGGGTCTCTTGGCCTTCACCCTAGCGGTGCTCATCCCCCCTGCTACAGCGCAAATAACCCTTTCTTCGGGGGGAAACAATGGCAGTCAGAATACTTCTAGCACCCCTTGGTGGGATACCAATAAAGCAAGACGTTGTGGCCGGCTCTGGTGCAGTGATGTGTTTTTGCAGGGCAGTTCCCAGGTCACCTTCACTGTGGGTTTAATTCCCAATCCAGAGGAAAGTTCCCAAGCGGCCGCCCAGGCCATTGAAAATCGGGCTAAGCAAGTGGAATCGATTTTTAATTCGATCTATTCTCGGTTAATTAGCTTAAATACGGTGGAAATTCCCGAGAAGGACGTGCAGTTTCTCCGC…	MPMGCRFATVKRLILLGLLAFTLAVLIPPATAQITLSSGGNNGSQNTSSTPWWDTNKARRCGRLWCSDVFLQGSSQVTFTVGLIPNPEESSQAAAQAIENRAKQVESIFNSIYSRLISLNTVEIPEKDVQFLRSKVFDLRESRLGYHSNPSNWPGTSPAPPNSRDSTTTAPEINQNNQESSSVERRTPTTSFRNAPQSAIRIISSPAPNLANVAADEIHPFTPNVEVGIQNNETVIFVPSQPSLGLAQQTIVTVNQADEIINGKPINLLAHEWRDRIQSSFDKALWGHELDRQHPWDRYYISGAFMVVALAIVTIMGLIRSFFYRRDRYLRQELKVLAQSITKDIEAESAESVRLASQEVSEFPELGPDRQGEEGQNGHGSPSKERNFPLYVPLADQVR…	unknown protein	unknown protein
NC_000911.1:3375291-3377588:+	NC_000911.1	HRIBO	CDS	3375291	3377588	+	slr1567	SGL_RS17460		2298	766	Yes	0.248055	1.22207	0.735061	0.505263	2.15712	1.33119	5.42	17.5	21.85	14.32	21.85	14.32	11.04	30.89	ATG	TAG	TGACTATTAAAATAT	ATGAAACTTTTTCATTGGCTACTTTATTTCACCACGTTCAGTTTACCAGGAATAATTCCCTGCCCTGTTTTAGCCAATGAAGTTCTCAATTTTACTAACTTTACCCCTACCACGGCAGAATTAAATGATGACTTCCCATTGGAAAAGACAATCAGATTAGAGCCATTTATAGTAGAAAATATTGCCGATTTAAGAGCCGCTGAATCAAATCAAGAGCCATGGCAAACTTCCGTAGATTATTCCCATAGCTTGACCTCCAGCACCCTAACCACGGAGGATTTAAGGGGCCAGTCAACACAGTTGGTACAGCTTACAAGCCAAGCATTAACTGAGCCAACAAAAGAAGGAGAACAAGATTTTTTGCCAGCCATAACTCCAGAAAAAAGTTCCTATCCGGAG…	MKLFHWLLYFTTFSLPGIIPCPVLANEVLNFTNFTPTTAELNDDFPLEKTIRLEPFIVENIADLRAAESNQEPWQTSVDYSHSLTSSTLTTEDLRGQSTQLVQLTSQALTEPTKEGEQDFLPAITPEKSSYPESITQQSTNTENSEQLSPNPIADTAQNDGWQIFITPGAILPINAYGSARIRRVQGDYHLTTADILEKLTVYAGGRVEAWHGNWGIILDGFYYNLQGATTNQRDNFTGLASFSPINYLLNTDINNRLNGISDILVDQSDILQQKKSDINQSLDQIQSEFELVRNAAPDRQELMAAIASASAKIEALQALGNAIDREAIGAWAEQINELKKMVEEGNLGEREIEQKLAQLQTVLAAAQGFRDNAIGSIDRLEDRVQQRVTEIQTFAAQL…	unknown protein	unknown protein
NC_000911.1:1656043-1658325:+	NC_000911.1	HRIBO	CDS	1656043	1658325	+	slr1325	SGL_RS09660	spoT	2283	761	Yes	0.811721	5.79018	3.30095	0.328487	2.63775	1.48312	54.71	167.51	67.4	28.93	67.4	28.93	22.14	76.31	ATG	TAG	ACCCTCCCCAAAACT	ATGAATGCCGTCGCCGCTCTGCCCACCCCCACCATTCACACCACCTGTGCCCAAGACATTCACGATATTGAATTGCCCCAGTGGTTAGAGGATTGTTTACAGCAGTGGCAGAGGGAGATAGAACAGGGCCAGGACGAAACAACGGCGCCCCATTGTCTAATTTGTCGAGCGTTCTGTTTTGCCTACGATCTCCATGCCCAACAGCGGCGGAAATCCGGGGAACCCTACATTGCCCATCCGGTGGCGGTGGCGGGGCTACTGCGGGATTTGGGGGGAGATGAGGCAATGATTGCGGCGGGTTTTTTGCATGATGTGGTGGAAGATACGGACATTAGCATTGAACAAATTGAAGCTTTGTTTGGGGAAGAAACGGCCAGTTTGGTGGAAGGGGTAACTAAA…	MNAVAALPTPTIHTTCAQDIHDIELPQWLEDCLQQWQREIEQGQDETTAPHCLICRAFCFAYDLHAQQRRKSGEPYIAHPVAVAGLLRDLGGDEAMIAAGFLHDVVEDTDISIEQIEALFGEETASLVEGVTKLSKFNFSSTTEHQAENFRRMFLAMAKDIRVIVVKLADRLHNMRTLDALSPEKQRRIARETKDIFAPLANRLGIWRFKWELEDLSFKYLEPDSYRKIQSLVVEKRGDRESRLETVKDMLRFRLRDEGIEHFELQGRPKHLYGIYYKMTSQDKAFEEIYDIAALRIIVESKGECYRALSVVHDVFKPIPGRFKDYIGLPKPNRYQSLHTTVLGLTSRPLEIQIRTEEMHHVAEYGIAAHWKYKESGGSENATLTSTDEKFTWLRQLLD…	GTP pyrophosphokinase	GTP pyrophosphokinase
NC_000911.1:3032496-3034775:+	NC_000911.1	HRIBO	CDS	3032496	3034775	+	slr0311	SGL_RS15960	hik29	2280	760	Yes	0.217308	0.886394	0.551851	0.327869	2.68388	1.50587	5.7	19.74	26.23	22.27	26.23	22.27	8.6	59.77	ATG	TAA	GCGGAACACGCCCCA	ATGAATTACTTGCACAAATATCATCTAGTTGAAGCAGAAAAAGCGCGGGTCTTAGGGCAATTCTTTGAGGCTGAAGAGTTTTATGAGCGAGCGATCGCAGGTGCTGCTGAAAATGAGTTTATTCAAGAAGAAGCATTGGCTTATGAATTAGCGGCTAAACATTATCTAGCGCGAGGTCGAGAAAAAATTGCTCGAACTTATATGAAAGAAGCGCACTATTGCTACGATCGCTGGGGCGCAAAAGCTAAAGTTAAAGACTTAGAAAAACGGTATCCACAATTACTCAATTCCAACTTGATTCGGCAATCAACTTTGACTGAGGGAATGATCAGTCATTCGACCGCCGTGATGAAAGCGGCTCAAGCCCTCTCAGAAATTATCCATCTTGATCAATTGATT…	MNYLHKYHLVEAEKARVLGQFFEAEEFYERAIAGAAENEFIQEEALAYELAAKHYLARGREKIARTYMKEAHYCYDRWGAKAKVKDLEKRYPQLLNSNLIRQSTLTEGMISHSTAVMKAAQALSEIIHLDQLIARLLLMAQAAISLENARLYERLANYAKTLERKLEEQTQALQQEIINRERTEDALRQSEANYRNLLQTANSIIIRYDPQGRIHYINDYGVKLLGYKEHQILGRTLFETIIPDIEISGRDVKPMVHNLLRNPQSYPQGEGENLCRDGRRVWVAWSNQAIFNDRGEVVEILSVGNDTTQRRQAEEALQRSEAKFRNIFANSQVGIYRSRIGDGLILDANQRFADLFGFDSPQEMIGIEHTTGYWVNLSDRQQGIEVIKRDGEVRNYEAQ…	two-component sensor histidine kinase	two-component sensor histidine kinase
NC_000911.1:1082437-1084716:-	NC_000911.1	HRIBO	CDS	1082437	1084716	-	sll1354	SGL_RS06940	recJ	2280	760	Yes	0.365536	2.92687	1.6462	0.180199	1.66968	0.924939	10.67	35.62	29.19	12.17	29.19	12.17	5.26	20.32	ATG	TGA	TTCAATTCTCTAACC	ATGGCCCAATTTCGTTGGCAGTTAATTCCCCCTGTTACTCCCCCGGCTATTTTTGTCGAACAGGTGCGTCGCCATTGTGGCCAATCCAGCGGTCAATTTGCCGCCCAATTACTGTGGCAAAGGGGCATTCAGTCAGCGGATCAGTTGGGTGGGTTTCTTTCCCCGGATTGTTATACTCCCACCAGCCCTTGGGAATTTGGCCAGGAAATGAAATGGGCTGTACAAAGGTTGGGCCAGGCCATGGCCCAGAAGGAAAAAGTCACCATTTGGGGGGATTTCGATGCCGACGGCATTACTTCCACTGCAGTGTTATGGGAAGGATTGGGGCAATTTTTTCCCCAGGATAGCCAGTTGACCTACACCATCCCTAACCGTTTACGGGAGTCCCACGGCCTCAAC…	MAQFRWQLIPPVTPPAIFVEQVRRHCGQSSGQFAAQLLWQRGIQSADQLGGFLSPDCYTPTSPWEFGQEMKWAVQRLGQAMAQKEKVTIWGDFDADGITSTAVLWEGLGQFFPQDSQLTYTIPNRLRESHGLNRPGLERLATQGTKLIVTCDTGSTNLDEIVYAQQLGMDVIVTDHHTLPDDRPEVVAIINPRYFADGHPLFNLSGVAVAFKLVEALYNQYPTVPQQPLEDLLDLVAIGLIADLVTLQGDCRYLAQRGIAQLRTQKDPATATRPGIHALLNLCNRNGDRPTDIGFGIGPRINAISRIKGDASFGVELLTSRDTKVCNQLAAEAETLNSRRKGLQKSVIIEIDQRLQNIDLSTTGVVVLTDPQWPTGVLGLAASHVAQTCGRPAILLNTQ…	single-strand-DNA-specific exonuclease RecJ	single-strand-DNA-specific exonuclease RecJ
NC_000911.1:425468-427738:-	NC_000911.1	HRIBO	CDS	425468	427738	-	sll0646	SGL_RS03900	cya2	2271	757	Yes	0.209964	1.62624	0.918102	0.230133	1.45596	0.843044	12.18	52.43	58.01	32.24	58.01	32.24	13.35	46.94	ATG	TAG	TACCAGAGAACATTA	ATGGGTTGGACCATACCGTCAGCTTGGAAAAGGTTTGTTTGGCAATCCCGGGGTATTTGGATTGCGACCCCTGCTGTGACGGCCATGGTGATTTTGCTCCGCTTTACAGGGCTTTTACAGGTGCTGGAATGGCAGAGCTACGATGCTGGGGTAAGGCTTTTACCAAGGCACGAAGATGACCGCATTGTCATTGTCGGCATTGATGAACAGGACGTCACCTACCTCAACACCCCCATCATTGATGATCAACTGCTGGCCAAAATTCTGACCAAGCTGAAGGCCCAACAACCAGCGGCGATCGGGCTGGATCTCTACCGGGATTTACCCATGCCACCGGGCACAGACGAGTTAGCGGCAGTATTCACCAGTACCCCTAATTTGGTGGGCATTGAGAAGGTA…	MGWTIPSAWKRFVWQSRGIWIATPAVTAMVILLRFTGLLQVLEWQSYDAGVRLLPRHEDDRIVIVGIDEQDVTYLNTPIIDDQLLAKILTKLKAQQPAAIGLDLYRDLPMPPGTDELAAVFTSTPNLVGIEKVAGKPGIETVNPPPLLKENNQVGANDLIIDADNIVRRGFIYLVRDGEPHYSFGLHLALHFLDSLKIYPEPVREGSDDFRLNQVTFSPLQSDSGGYIRADDGGFQLLIDYQSTFPKVSLTDVLEDKLPADWGKGKIILLGKVGESFKDLYFTPNSSTFGLSRAVPGVEIHGNIISQILNAGMEGQPLLKSWSEPVEWLWVGLWSFFGAVITWQLRYATRRSGGQWLPIAAIVGSLGALLAISYGALLAGWWLPVIPPMLGLLGSGVFI…	guanylyl cyclase	guanylyl cyclase
NC_000911.1:345536-347806:-	NC_000911.1	HRIBO	CDS	345536	347806	-	sll0923	SGL_RS03505	epsB	2271	757	Yes	0.135345	1.25056	0.692952	0.0724949	0.796553	0.434524	63.01	302.61	465.55	241.98	465.55	241.98	33.75	192.75	ATG	TAG	ATTCCCCCCAAGATA	ATGACCTACAGTTACCCAGAATTGCCCCAAGGTAGCCCCCCCCCTCCGCTAGTTGGAGCATACGGTGCTGAAGAAGTGGACTCTTTTTCCCTTGGTAACCTGACAGGTGTATTGAGGAGGAGATGGTGGATTGTTGTCCTGGTGGCCCTAGCGGTGGGAGGCTTGAACCTCAAGCGGCAACTTGATAAGCCGCCGGTTTTTCAATCTAGTTTCCAATTACTGGTTTCCCCCCCCGAGAATGAAACGGTTAATCCCCTGGCCCAACTCCAAGGTTCGGGACTGCTGGGCAGCCTTCCCCGGGGCAAAGAATATTTGAACACCCAGTCGGAAATTCTACAAAGTAATATTCTATTGGAGCCGGTCTGGAGCCAAATTTATGACGCCCTCCCCCCAGAGGAG…	MTYSYPELPQGSPPPPLVGAYGAEEVDSFSLGNLTGVLRRRWWIVVLVALAVGGLNLKRQLDKPPVFQSSFQLLVSPPENETVNPLAQLQGSGLLGSLPRGKEYLNTQSEILQSNILLEPVWSQIYDALPPEEQISYSSFLASLSVMVVPDTGIVEISYRGNDQERVKAVLEALAEQYLDYTRREQARQESEKLRFVNDQLPKFQDRVAELQAQMLALQQQYKFFDPSQTAENLSSRLNEINVLRQNLSIKIQQLTAKRDALEQKTGIDNNSAFGLSSLGQSPVYAGLVSRLNEINLKLAEASTIYTGNSPQMEQLQEEKDNVLQLIRAEAEKEKGTLSNGELDQVLIATDVGGPKAEALQELASVGIELDILNIELESIIGSEAELRNQLENFTTIAG…	unknown protein	unknown protein
NC_000911.1:295076-297343:+	NC_000911.1	HRIBO	CDS	295076	297343	+	slr1298	SGL_RS03260		2268	756	Yes	0.329146	1.47412	0.901635	0.296482	1.77796	1.03722	3.93	8.83	11.94	5.99	11.94	5.99	3.54	10.65	ATG	TGA	ACCTACTTTTAACTG	ATGCTGGCTAAGCTCCGCCAACGCCTTGCTTTTTTAACCCGTACCAATGGGACTATTGATTGGGGTAGGGGCATTCGTACTTTTTGCGGCATGGCAGTCCCCTATCTGGGGGGCATGGCCCTGGGAAATCCCCAACTAGGTTTGGGCGTTGGTTTAGCTTCCCAATTAATTTTATTAGCGGACATGGGGGGACTATATTCCGTCCGTTTGAAGACTATTTTCGGGGCCTGGGTCGGGGCGGCGATCGCCATGGCAGTGGGAACTATAGTGCCCGATGGTTGGGGTTTAGGGCTAGCAATAACGGGCTTCGTTTTATTTGCTAGCGGTTATCTAGCGGTTTATGGGGAGCAGGGAGCCATGGTGGGCATTGTCACCACCTTTGCTTTTCTCCTCGGTGCC…	MLAKLRQRLAFLTRTNGTIDWGRGIRTFCGMAVPYLGGMALGNPQLGLGVGLASQLILLADMGGLYSVRLKTIFGAWVGAAIAMAVGTIVPDGWGLGLAITGFVLFASGYLAVYGEQGAMVGIVTTFAFLLGAQNVSTDSFEFTSLAIGGMWSLILAIFIWPFRPNQPLRQMVANNYSILGNYLRAMAAANFSPDDPQAQQLVVKLRQNLLKSRQTLVASQRGLWGQSKLRELLLVLIEHTERLNKCLMLLNEIVNFHNLPQLQTVEILMEDAFNALGEVCLDLGQMVLGKRRIPNTNRLQLLVQALQQQKKLQRQALTEDFNDYNSLTTVTQLVNHLENLIKQLEQTIQTAELLQNPQLFSDNNSNDQGKLNKVRLMPWWDPLGSNFHLNSPLLRHGL…	unknown protein	unknown protein
NC_000911.1:941686-943941:+	NC_000911.1	HRIBO	CDS	941686	943941	+	slr1834	SGL_RS06305	psaA	2256	752	Yes	0.716605	5.63938	3.17799	0.39481	2.18177	1.28829	613.6	3753.91	856.26	665.66	856.26	665.66	338.06	1452.32	ATG	TAG	CGAGGAGAACCCTGC	ATGACAATTAGTCCACCCGAAAGAGAGGCTAAGGCCAAAGTCTCGGTTGATAACAACCCGGTACCAACTTCCTTCGAGAAGTGGGGCAAGCCGGGTCACTTCGACCGGACTTTAGCTAGAGGTCCCAAAACCACCACTTGGATTTGGAATCTCCATGCCAATGCCCATGATTTTGATAGTCAGACCAGCGATTTAGAAGATGTTTCGCGCAAAATCTTCAGTGCTCACTTTGGGCACCTCGCTGTGGTCTTTGTTTGGTTAAGTGGAATGTACTTCCACGGCGCGAAATTTTCCAATTACGAAGGTTGGTTAGCCGACCCTACCCACATTAAACCCAGTGCCCAAGTGGTTTGGCCCATTGTCGGTCAAGGCATCTTGAACGGGGATGTGGGCGGTGGC…	MTISPPEREAKAKVSVDNNPVPTSFEKWGKPGHFDRTLARGPKTTTWIWNLHANAHDFDSQTSDLEDVSRKIFSAHFGHLAVVFVWLSGMYFHGAKFSNYEGWLADPTHIKPSAQVVWPIVGQGILNGDVGGGFHGIQITSGLFYLWRASGFTDSYQLYCTAIGGLVMAALMLFAGWFHYHVKAPKLEWFQNVESMMNHHLAGLLGLGSLGWAGHQIHVSMPINKLLDAGVAPKDIPLPHEFILEPSKMAELYPSFAQGLTPFFTLNWGVYSDFLTFKGGLNPVTGGLWLSDTAHHHLAIAVLFIIAGHMYRTNWGIGHSMKEILEAHKGPFTGEGHKGLYEILTTSWHAQLAINLALLGSLTIIVAQHMYAMPPYPYQAIDYATQLSLFTHHMWIGGF…	P700 apoprotein subunit Ia	P700 apoprotein subunit Ia
NC_000911.1:1777729-1779981:+	NC_000911.1	HRIBO	CDS	1777729	1779981	+	slr1969	SGL_RS10275	hik24	2253	751	Yes	0.301117	1.8242	1.06266	0.19561	1.45141	0.823512	7.82	20.65	25.97	11.32	25.97	11.32	5.08	16.43	ATG	TAA	TATGTTCAATTCGGC	ATGCTACCCGCTTTTTCCCCCATTTTCCGTCGACTCTTACCTGCTGTCACCTTTGAACGCTTGCTCCGTTTTTGGCGTACCCTGGCCCAACAAACAGGAGATGGGGTGCAGTGTTTTGTGGGGGATTTGCCCAGTAGTTTGAAGCCTCCCCCTGGGCCATCGGTGCTGGAGGCAGAGGTTGACCACCGTTTTGCCCTCCTGGTTAGTCCAGGGCAATGGGCCCTGTTGGAAGGAGAACAAATTTCTCCCCACCATTATGCGGTGTCCATCACTTTTGCCCAGGGTATCATCGAAGACTTCATTCAAAAGCAAAATTTGCCCGTGGTAGCGGAAGCCATGCCCCACCGGCCAGAGACTCCATCTGGTCCCACCATTGCCGAACAATTGACCCTGGGGCTA…	MLPAFSPIFRRLLPAVTFERLLRFWRTLAQQTGDGVQCFVGDLPSSLKPPPGPSVLEAEVDHRFALLVSPGQWALLEGEQISPHHYAVSITFAQGIIEDFIQKQNLPVVAEAMPHRPETPSGPTIAEQLTLGLLEILNSDSTSFSPEPSLQDSLQASQVKLLSQVIAQIRQSLDLSEILNNAVTAVQKFLFVDRLVIYQFHYSQPSLTPLEENQIPAPRPRQQYGEVTYEARRSPEIDTMLGIMTENDCFSQVFSYEQKYLKGAVVAVSDIENHYSSSYCLVGLLQRYQVRAKLVAPIIVEGQLWGLLIAHQCHHPRQWLDSEKNFLGQIGEHLAVAIVQSLLYSEVQKQKNNFEKRVIERTKELRDTLMAAQAANLLKSQFINNISHELRTPLTSIIG…	two-component sensor histidine kinase	two-component sensor histidine kinase
NC_000911.1:739682-741931:+	NC_000911.1	HRIBO	CDS	739682	741931	+	slr1710	SGL_RS05320	mrcB	2250	750	Yes	0.194054	2.55333	1.37369	0.117297	1.20401	0.660655	14.36	68.71	74	26.91	74	26.91	8.68	32.4	ATG	TAG	TTGCCCTAATTTGCC	ATGGCTACCCGTTCCCGCAAAGCCCCTTCTGCCCCTAAAAAAAGTCAAACTAACCTTTCCCAGGGTGGCAACAGCCAAAAGGTAGCCCTCAAAAAAGGCTCCAGGGTGGCCAAAATTCGTCTGCAGGAATCGGGCAAAAATTCCCAATCCCGGCGGGTATTTCCCCTCCTTGGCGATCGTTATTTTCTCGGCCGCAGTTCCAGTTGTGATATTCAACTGCAAAATCCCCTCGTGAGTCAGACCCATTGTTCCCTGCGGCGGGACCCTGACCATCCTAACCAGTTTTTTATTCGAGATGAAGGCTCTAGCAACGGCATTTATCTGCAACGTCGCCGCCTAAAAAGCTATCGTCTGCAGCATGGTGATGAAATTACCCTGGGGCCACCGGAATTGGTGGAT…	MATRSRKAPSAPKKSQTNLSQGGNSQKVALKKGSRVAKIRLQESGKNSQSRRVFPLLGDRYFLGRSSSCDIQLQNPLVSQTHCSLRRDPDHPNQFFIRDEGSSNGIYLQRRRLKSYRLQHGDEITLGPPELVDVPKLVYFNPPPLWLKGMRTFFSTGILFFLIITGAIAWQWSKIPVKPMPSGVTGPVKVYAGDGVTEINPVKQEIHREFDNLSDFSPYLPQAVIASEDTRFYWHFGVDPYGLGRAIYINLQDRDVKQGASTLTQQLARSLFSEVGRENTAGRKIREMFVALKLEAVYSKDDILKAYLNRVYLGAGNYGFEDAAQFYFDKSAQDLDVGEAATLVAMLPAPNLYNPVQDYQTSVQLRNRVIERMAMLGMIDEQEANRARRSRIQVSPKAT…	penicillin-binding protein	penicillin-binding protein
NC_000911.1:2607812-2610058:+	NC_000911.1	HRIBO	CDS	2607812	2610058	+	slr0473	SGL_RS14030	cph1, hik35	2247	749	Yes	1.19041	8.87763	5.03402	0.727313	4.00806	2.36769	80.15	253.19	67.33	28.52	67.33	28.52	48.97	114.31	ATG	TAA	TTAAGGGAAAAACCC	ATGGCCACCACCGTACAACTCAGCGACCAATCCCTCCGTCAGCTAGAAACCCTCGCCATCCACACCGCCCACCTGATTCAGCCCCACGGTTTAGTGGTGGTCCTGCAGGAACCAGACCTCACCATCAGCCAAATTAGCGCCAACTGCACCGGCATTTTAGGGCGATCGCCAGAGGATTTGTTGGGCAGAACCCTAGGGGAAGTGTTTGATAGCTTTCAGATTGATCCCATCCAGAGTCGCCTAACGGCCGGACAAATCAGCAGCCTCAACCCCAGTAAACTTTGGGCGCGGGTCATGGGGGACGACTTTGTCATTTTTGACGGGGTTTTTCATCGCAACAGTGACGGTTTATTGGTATGTGAACTAGAGCCAGCCTACACTTCCGATAATCTGCCCTTC…	MATTVQLSDQSLRQLETLAIHTAHLIQPHGLVVVLQEPDLTISQISANCTGILGRSPEDLLGRTLGEVFDSFQIDPIQSRLTAGQISSLNPSKLWARVMGDDFVIFDGVFHRNSDGLLVCELEPAYTSDNLPFLGFYHMANAALNRLRQQANLRDFYDVIVEEVRRMTGFDRVMLYRFDENNHGDVIAEDKRDDMEPYLGLHYPESDIPQPARRLFIHNPIRVIPDVYGVAVPLTPAVNPSTNRAVDLTESILRSAYHCHLTYLKNMGVGASLTISLIKDGHLWGLIACHHQTPKVIPFELRKACEFFGRVVFSNISAQEDTETFDYRVQLAEHEAVLLDKMTTAADFVEGLTNHPDRLLGLTGSQGAAICFGEKLILVGETPDEKAVQYLLQWLENRE…	cyanobacterial phytochrome 1, two-component sen sor histidine kinase	cyanobacterial phytochrome 1, two-component sensor histidine kinase
NC_000911.1:138295-140535:+	NC_000911.1	HRIBO	CDS	138295	140535	+	slr0237	SGL_RS02490	glgX	2241	747	Yes	0.423067	5.44346	2.93326	0.118398	1.51842	0.818411	16.58	42.84	39.19	7.87	39.19	7.87	4.64	11.95	GTG	TAG	TTTTTGGAATTGCCT	GTGCCACAGTTGATATCTGTTCCCAACCTGTCCACCGATGTCCACCTTGGCCAAACGTTTCCCTTAGGGGCAACGGTCTACGCCGATGGGGTTAATTTCTGCTTGTTTTCCAAACATGCGGAAAGGGTCACGCTATTGTTGTTTGATCGCCCTAATGATCCGGCCCCGGCCCGCACCATTGAGCTTCATCGAGGACGGAACCGCACCTTCTACTACTGGCATGTTTTTGTGAAGGGTTTAAAGGCGGGGCAGGTTTATGCTTACCGTGTTGATGGGCCCCACGAACCGGAAAAGGGCCATCGGTTTGACCCGGACAAAGTTTTGCTCGACCCCTACGCCAAGGCGATCGTCGGGAAGGATATTTACGACCGCAAAGCAGCCATGGCCCTCGGAGATAAC…	VPQLISVPNLSTDVHLGQTFPLGATVYADGVNFCLFSKHAERVTLLLFDRPNDPAPARTIELHRGRNRTFYYWHVFVKGLKAGQVYAYRVDGPHEPEKGHRFDPDKVLLDPYAKAIVGKDIYDRKAAMALGDNCAQALRSVVVDTSVYDWEDDHAPRTPYAASIIYELHVGGFTRNPNSGLSENKRGTYAGLIEKIPYLKELGITAVELLPVHYFDPEDAQPGLTNYWGYSTIGFFAPHQGYSAADDPLEVVDEFRDMVKALHKAGIEVILDVVFNHTAEGNEKGPTLSFRGIDNRTYYILDEDKSSYSNYSGCGNSVKANHPVVGGLILDSLRYWVSEMHVDGFRFDLASVLVRDTKGVPLHGSEIATANIIWAIESDPILAGTKLIAEAWDAAGLYS…	glycogen operon protein GlgX homolog	glycogen operon protein GlgX homolog
NC_000911.1:764301-766538:-	NC_000911.1	HRIBO	CDS	764301	766538	-	sll1920	SGL_RS05435	pacS	2238	746	Yes	0.554016	1.36496	0.95949	0.776348	0.829143	0.802746	33.59	50.49	60.63	36.99	60.63	36.99	47.07	30.67	ATG	TAG	TATTACCGATTAACC	ATGGCCCAAACCATCAATCTGCAACTAGAGGGAATGCGCTGTGCGGCCTGTGCTTCCAGCATTGAACGGGCGATCGCCAAAGTGCCGGGGGTGCAGTCTTGCCAGGTGAATTTTGCCCTGGAGCAGGCGGTGGTCAGTTATCACGGGGAAACGACCCCCCAAATCCTCACAGATGCGGTGGAGCGAGCGGGTTACCACGCTAGGGTGCTTAAACAACAGGTTTTATCTTCCCAGCAAACCGAGGATAGGAAACCCGTGTTTTCGGCCAAATTGGTAACGGGGTTAGTAATCAGCGCTGTGCTCTTTTTTGGCTCCTTGCCCATGATGCTGGGGGTAAATATTCCCCATTTTCCCCATATTTTCCATGATCCCTGGTTGCAATGGTTATTGGCTACGCCG…	MAQTINLQLEGMRCAACASSIERAIAKVPGVQSCQVNFALEQAVVSYHGETTPQILTDAVERAGYHARVLKQQVLSSQQTEDRKPVFSAKLVTGLVISAVLFFGSLPMMLGVNIPHFPHIFHDPWLQWLLATPVQFWSGAEFYRGAWKSVRTRSATMDTLVALGTSAAYFYSVAITLFPQWLTSQGLAAHVYFEAAAVVITLILLGRSLEQRARRETSAAIRKLMGLQPQTALVKRGEHWETVAIAELAINDVVRVRPGEKIPVDGVVVAGNSTVDESLVTGESFPVDKTVGTEVIGATLNKSGSLDIQVSKLGQDSVLAQIIQLVQQAQASKAPIQHFVDRITHWFVPTVIVVAIAAFCIWWLTTGNITLAVLTLVEVLIIACPCALGLATPTSVMVG…	copper-transporting P-type ATPase PacS	copper-transporting P-type ATPase PacS
NC_005229.1:38856-39641:+	NC_005229.1	HRIBO	CDS	38856	39641	+	MYO_RS16740			786	262		0.104189	0.601034	0.352612	8.10528	3.81932	5.9623	34.32	110.44	329.4	183.75	329.4	183.75	2669.88	701.8	ATG	TAA	TTTTCACCATAATTA	ATGATAATCCGAGAATTTTACAGCACGGACATCACTGATAGCCAGTAGCAATTGGTAGAACCTCATTTACCCAAAGCAAAAACTGGGGGAAGAAAACGGAAAACTAGTCTGAGGGAGATACTCAATGCTATTTTTTACATGCTCAGAACGGGGTGTGCCTGGCGACTTCTGCCCCATGATTTTCCTAAATGGCGAACGGTCTATGGTTATTTCCAGCAATGGCACGAAGATGGTACCTGGAAAAAATTAAACCGTATCTTCCGTGAGAAAGTTCGGCTCAAAGCTGGAAGAAATACTCACCCTAGTGCCGGTTGTTTAGATTCACAGTCACTTAAAAAGGCTGGAACTGGGCAAGAAACTGGCTATGACGGTGGAAAAAAGGTCAATGGTCGTAAACGT…	MIIREFYSTDITDSQ	IS5/IS1182 family transposase	internal stop_Derived by automated computational analysis using gene prediction method: Protein Homology.
NC_000911.1:3479829-3482039:-	NC_000911.1	HRIBO	CDS	3479829	3482039	-	sll0450		norB	2211	737	Yes	0.458019	5.79987	3.12894	0.166667	1.94198	1.05432	18.22	88.97	39.78	15.34	39.78	15.34	6.63	29.79	GTG	TAA	GTAGTTACTTTTTCT	GTGCTCCTGGGGGCAGGGGCTGCTATCTATAAAAATGCTCCCCCCATTCCCGTCACGATGGTTTCTCCCCAACAGGAGATCGTTATGACCCAAGCAGAAGTGCAACGGGGCCAAGCAACTTACCTGGCCCGGGGGGGACAACATATTGGTAGTGTGTGGGGCCATGGCAGTTACCTTGCTCCCGATTGGACGGCGGATGTGTTGCACCGTTGGGGGCTGGCTACGGCCGGTGTGCTCTACGATGGCGATGCAAATTTTAGCCAAACGGATTTGGAAGCATTGCCACCAGTGGCACAGGCCCAACTCCAGGCAGAAGTGAAACAGGAGTTTAAACCTAACCGTTACGATCCAGAAACGGGGATTTTAAGCCTAACCAATGCCCAAACCCAGGGTTTAGCT…	VLLGAGAAIYKNAPPIPVTMVSPQQEIVMTQAEVQRGQATYLARGGQHIGSVWGHGSYLAPDWTADVLHRWGLATAGVLYDGDANFSQTDLEALPPVAQAQLQAEVKQEFKPNRYDPETGILSLTNAQTQGLAQVFDDYQALLLNGSAIHSIPRDWFPEAGDRHDVTAFFAWTAWTAAANRPNSPLSYTANWPHDDLIGNQAPGQFIVWSIVSVIVLIAAIALFLFVYLTQEDAEEVQAVAERPALRLATPSQRITTLFFGVAMALFGVQLLMGMVTAHYAVEGEGFYGIPLQQYLPYAASRTWHLQLAVFWIATCWLAAGLYFAPRFGKHEPKGQAIGNGILLAALTLVVVGSLVGAWFGIQGYLGNDQSFWFGHQGYEYVELGRLWQLLLIGGMVFW…	cytochrome b subunit of nitric oxide reductase	cytochrome b subunit of nitric oxide reductase
NC_000911.1:2185870-2188077:-	NC_000911.1	HRIBO	CDS	2185870	2188077	-	sll0148	SGL_RS12155		2208	736	Yes	0.20939	2.08659	1.14799	0.0974951	0.694074	0.395785	27.92	90.85	133.34	43.54	133.34	43.54	13	30.22	ATG	TAG	AGAGTTGAATTGACA	ATGACCTTTGACCGACGGACATTTTTACGTAGCGGCATGGCCCTGGGCCTTGGTTCCTGGGCCTGGGCATGGTCCGGCAGAAATATGGGCCAATCCCTCGCATCCAACACCAATCAAAAGTGGGCCCTACTGTTGGCGGCGGGGCAAGGTAATGGAGCCAATGGCGATCGCCGGGGATTGATGGGATGCACCACCGATAGGCAATTGCTGGGGGAAGTTTTAACGGGGCGTTACGGTTTTGATCAAGCCAAGATTGCCGGGTTAGACCCCCAAGGTATTACCCTGTCAGCCCTGGAAATTTTATTTGATGAGCATCTACGGCAACAGGTGCAGAAAGGCGACCCAGTGGTGGTGGCCTTTAGTGGTTATGGCAGTTATAACCCACCAGCAGCCATGACC…	MTFDRRTFLRSGMALGLGSWAWAWSGRNMGQSLASNTNQKWALLLAAGQGNGANGDRRGLMGCTTDRQLLGEVLTGRYGFDQAKIAGLDPQGITLSALEILFDEHLRQQVQKGDPVVVAFSGYGSYNPPAAMTPNPTWEQALPHLGLFLDGEGEDNFLPLTTLINWLQSLKTKQVYLVLDCGFSTGVEEFEGNLRGRSGGRGGPIPPEVNPSNPPTKASLGNITLISATSPGQTAVEVQLGKQSAGLFTLALTQSLWENSSTSVMASLWDHSRNLLVPRLGTEQIPQWRSPNNSPDFLAPTTLTTGGEGMVTGLISGNSLQSQIVALAPLVQKRALVHSCYLTFPATETGSDLNSTDNSLWQVQSVKGQSATLTAITKTSSTKAESATSSTEANGGESK…	hypothetical protein	hypothetical protein
NC_000911.1:3449928-3452129:+	NC_000911.1	HRIBO	CDS	3449928	3452129	+	slr1651		hlyB	2202	734	Yes	0.367583	1.53134	0.949459	0.351664	2.09264	1.22215	2.54	5.62	6.91	3.67	6.91	3.67	2.43	7.68	ATG	TAA	TACATTTGATTTGAG	ATGGTATCGCTTAAGCAAAATTTACTTGGTGTAAAAAATCGCATTACTTGCATGGCTAAATATCAATGGGTTCAACAACAGAGTGGTGAGGACTGTGCGGCGGCAAGTTTGGCGATCATTGCAAAGCATCACGGACGCAATATCAGAATTAATCGAATTAGGGCGCTGGTGGGGACTCGCCAAGGGGGAACCACTTTACTCGGGCTTAAGTATGGGGCGCAGGAACTGGGCTTTATAACCTCAGCCATCCAAGCAGAACCGGAAATTCTCGACGAATTGGATGAGTGGGCTTTACCGGCAATTATTTTTTGGAAGGGATATCATTTCGTTGTTTTGTACGGGCAGGAAAAAGATAAATACGTCATTGCAGATCCGGCGATCGGGGTTCGTTATTTAGAC…	MVSLKQNLLGVKNRITCMAKYQWVQQQSGEDCAAASLAIIAKHHGRNIRINRIRALVGTRQGGTTLLGLKYGAQELGFITSAIQAEPEILDELDEWALPAIIFWKGYHFVVLYGQEKDKYVIADPAIGVRYLDRQEVIKGWQGGMMLLLEPDPKGFISQLDEDPVHPVDNLLKRLWEYREIFGKLFPLNLAVGIFSLSTPLLLKFLTDSVLTKSDTQKLTWVAIGVILITVVNAICSFLQSNLVASFAEELQKGLKLEFGLQILNLPITYHEARRSGTAIRRLSDIQRINLLVSQLVIDLPIKTFIGLVALGFIVFYSWQLAAIVAAIGGIMTLSTIAFQPIVRQTTYRSITMAGENAGLLAESFNGALATKTTAASPQLWLEIQHRLQREFKLNYRTA…	ABC transporter ATP-binding protein	ABC transporter ATP-binding protein
NC_000911.1:917816-920014:+	NC_000911.1	HRIBO	CDS	917816	920014	+	slr2077	SGL_RS06175		2199	733	Yes	0.359064	2.76663	1.56285	0.688889	3.02418	1.85654	6.14	22.88	17.1	8.27	17.1	8.27	11.78	25.01	ATG	TAA	AGCAGTTCCCCGTTA	ATGAATGGTATTCACCGTTGGCTTTTCCGTTTAAGCATTATCATCCAGTTGCTCTGGGGTTCGGCGCCGGTAACTGGAACCCAGGTGGTGCGGATCGGAGTTTATGAAAATCAACCAAAGATTTTTCTCAATGATCAAAATAGGCCAGTGGGCTTTTGGATTGACGTAATCGAGGCGATCGCCGCTGCGGAGAATTGGCAAATTGAATACCACCTTTGTGAATGGCAAGCCTGTTTGCAAAAGCTAGAGGCAGGGAAAATAGATCTAATGCCCGACGTAGCAGTCAATCCTGAAAGAGCAAAAAAGTTTCAATTTAATCAAGAAGTAGTTCTAAACAGTTGGTCAATTATTTATGCTGCGAACAATGCCAATATCAATTCTATTATTGATCTAGAAGGA…	MNGIHRWLFRLSIIIQLLWGSAPVTGTQVVRIGVYENQPKIFLNDQNRPVGFWIDVIEAIAAAENWQIEYHLCEWQACLQKLEAGKIDLMPDVAVNPERAKKFQFNQEVVLNSWSIIYAANNANINSIIDLEGKRIVVLKNSVQEKNLIKRLAELKIKAEIIQVDSFSELFKKIDAGEADAGAVNYFFGNRFSHQHRVRPTNMVVDTSQLFFAASRQTNPAILRNIDEQVNLLKADTDSIYYESQKRWLFNNPLLTIQNLRAIIHRLIIIFIIVTVAIVIIWNYRLQKEIKLRKASQNQLSYQALHDTLTGLANRALLLQRLEFAGHQIKNNPKSRFALLFIDLDHFKLINDSWGHSVGDALLIKIAEKLQINLRETDLAVRLGGDEFVIFLESITEIK…	probable ABC transporter, periplasmic binding p rotein	probable ABC transporter, periplasmic binding prot ein
NC_005231.1:25147-27345:+	NC_005231.1	HRIBO	CDS	25147	27345	+	slr8030	SGL_RS01275		2199	733	Yes	1.01087	2.56003	1.78545	0.428501	0.88258	0.655541	17405	34314.2	17217.8	13403.8	17217.8	13403.8	7377.84	11829.9	ATG	TAG	CACCCTACCTGCATT	ATGGTCTGGTCACGTCGAAATTTTCTTGCAGTGATGGGCTTAGGAGCGGGAGCGGCCCTGTTCAACCCCCGGCAGTATCCTTTAACAGCCGCTATTCCCAAAATCGGCGATCGCCACGGGGATTTGAGTTTTCAACCGATTGACTATCCTATTCCTCTGGCAACGGATGGATTAACCCCTGCTCAACAAAAAACCGCCTTTGCCACCTTTGCGGTTCAAGATGAGTTGGTTTTACCGTCGGACTTTTTTTACACCGTCCTGGGGCAATGGGGAGATCCGGTGGGAGATCACTGGTTTGGGTTTAATAATGATTATTTAGGGCTGGTGGAAACCGACGAAAATACGGCTTATTTGTTAATCAATTTTGAATATATTAGCTTTATCCCCTGGCGACAGGGC…	MVWSRRNFLAVMGLGAGAALFNPRQYPLTAAIPKIGDRHGDLSFQPIDYPIPLATDGLTPAQQKTAFATFAVQDELVLPSDFFYTVLGQWGDPVGDHWFGFNNDYLGLVETDENTAYLLINFEYISFIPWRQGYEMAIGKSLPIETVLTAAEAQGGKINAFALAADNPVKIDIEALCEAALVDQGMGVIRLERNGQGDWQRSPNATDRRITGLSGLTDSHYLTATGPAIAIFTNPTKQGYDDGLGEKIIGTFGNCAGGTTPWGTVLSAEENFQSQVPEAVYADGSAVDPAQCPLKISTNGLSGQGNVFGLAGNKYGWMVEIDPANANDYGVKHTALGRFRHEAVAVRATANQPLAVYSGCDRTSGHLYKFVSADTVKSPTDKGNSRLFTAGTLYGAKFN…	DUF839 domain-containing protein	slr8030_Derived by automated computational analysis using gene prediction method: Protein Homology.
NC_000911.1:3257692-3259887:-	NC_000911.1	HRIBO	CDS	3257692	3259887	-	sll0529	SGL_RS16950		2196	732	Yes	0.405252	7.40399	3.90462	0.209746	1.67556	0.942652	82.25	463.49	202.96	62.6	202.96	62.6	42.57	104.89	ATG	TAG	CTAGGATTTTTTCCC	ATGACCGTCGCCTCCACCGCCCCTGCTTTTTGCCAAGGAATTCGCTTTTTCGGTGAAAACCTGCCGGATTTTGATCGTTATGGCCAGGAAACGGCGATCGCCAGTGGGGCAAAGGCCATCAGTTCTGCCAATGATCCCCAGGCGGTGTATCAAACTTTGTTGGCGGCGGATGCCCTCAGATATTTAACGCTCCAAACCACAGCCAGTAAAGAATCGGGTCACCCCGGCGGTTTTGCCAGCATTGCGGAGGCGATCGCCGCTCTGGTCATGTTGGGCTACAAAAATACGGTGACGGAAGTGGGCCACCATGCCCCCGGTTTTTACAGCACCATGTTTTTGGATCGTTCCCTGGAAGCCATGGGGATTAATAATGTCCAAGAACTTGGCGATCGGTTCCGG…	MTVASTAPAFCQGIRFFGENLPDFDRYGQETAIASGAKAISSANDPQAVYQTLLAADALRYLTLQTTASKESGHPGGFASIAEAIAALVMLGYKNTVTEVGHHAPGFYSTMFLDRSLEAMGINNVQELGDRFREMHGLLGHLSGQIPGLLAPAGPLGQGQHFAMAGAKLYPGVLFPVTIGDGGLGEPYIMSSFGHFHTAYPQVTNFLPILVWNGFSQEHHSMVSTQSNEAMVNYWQGNGFKNVILVNAKDFDDSNQAGDFVDSTKFSFQQRLAFTQAVLEATDKAAQAALGGTLTVLIVKQLKGAGVHKSGAKSHNLYPGDSLDKDYIVSALQERALSPEAWQLVRTNFERSHGGPASQTVVTESVLPLADLGTLPLKEFALEDKQVATTAMGELVVHV…	hypothetical protein	hypothetical protein
NC_000911.1:944187-946382:+	NC_000911.1	HRIBO	CDS	944187	946382	+	slr1835	SGL_RS06310	psaB	2196	732	Yes	2.23159	11.107	6.66931	1.43777	5.71921	3.57849	514.76	3575.91	230.67	321.95	230.67	321.95	331.65	1841.3	ATG	TAA	ATTTCCGAAAAAGCT	ATGGCAACTAAATTTCCTAAATTTAGCCAGGATCTCGCCCAAGACCCGACTACACGGCGTATTTGGTACGGGATTGCTACGGCCCACGACTTTGAAACCCACGATGGGATGACTGAGGAGAATCTTTACCAAAAGATTTTTGCCTCCCACTTTGGACACATCGCCATCATTTTCCTGTGGACGTCTGGCACCCTTTTCCACGTTGCGTGGCAAGGTAATTTTGAACAATGGATTAAAGATCCTTTAAACATTCGCCCGATCGCCCATGCGATTTGGGACCCCCACTTTGGCGAGGGAGCTGTCAATGCTTTCACCCAAGCTGGGGCTTCTAACCCGGTTAACATTGCTTATTCCGGGGTTTACCACTGGTTCTACACCATTGGTATGACCACCAACCAA…	MATKFPKFSQDLAQDPTTRRIWYGIATAHDFETHDGMTEENLYQKIFASHFGHIAIIFLWTSGTLFHVAWQGNFEQWIKDPLNIRPIAHAIWDPHFGEGAVNAFTQAGASNPVNIAYSGVYHWFYTIGMTTNQELYSGAVFLLVLASLFLFAGWLHLQPKFRPSLAWFKNAESRLNHHLAGLFGVSSLAWAGHLVHVAIPEARGQHVGWDNFLSTPPHPAGLMPFFTGNWGVYAADPDTAGHIFGTSEGAGTAILTFLGGFHPQTESLWLTDIAHHHLAIAVIFIIAGHMYRTNWGIGHSIKEILNAHKGPLTGAGHTNLYDTINNSLHFQLGLALASLGVITSLVAQHMYSLPSYAFIAQDHTTQAALYTHHQYIAGFLMVGAFAHGAIFFVRDYDPV…	P700 apoprotein subunit Ib	P700 apoprotein subunit Ib
NC_005232.1:11315-13507:+	NC_005232.1	HRIBO	CDS	11315	13507	+	slr6012			2193	731	Yes	NaN	NaN	NaN	NaN	NaN	NaN	0	0	0	0	0	0	0	0	ATG	TAA	ACAATTTTTTAAATT	ATGGACAGCCCCCGGCAATTGTCATCGCCTACCTTGACGAACGTTATTCCTCTTGCAGCAGGGATAATTGTCGCATTAGTAGGAATAGCCGCAAAAATTCAACCGCTTCAATCTGGAATAATGGGATTTACCGCAGGAGTCAGCGGGGCGGCAACAGCAAGTTTAGCGACAAAAAAAGAAAGGGAAATTTTGCTCTTAGCAGAACAGGAGCTTAGCAAAACAAAAATTAACAATACGCTTTCTGAGTTACAAGAACAGAAAAAAATAATTGATAAAGATATCACTCGATTAGAAGAACGCCGGAGCCAATCAGAAAAAATTGCTGGGGAGTTAGAGATTCGGCAGGCAAAGCGGGATAGCATCGAAGCCGAAATTAAAAATTTACAAGCGGTACAACAA…	MDSPRQLSSPTLTNVIPLAAGIIVALVGIAAKIQPLQSGIMGFTAGVSGAATASLATKKEREILLLAEQELSKTKINNTLSELQEQKKIIDKDITRLEERRSQSEKIAGELEIRQAKRDSIEAEIKNLQAVQQNLESRVAEINKANPTLENLEIRQKEISRLQSIIKQLEGELFAYKSKIAEMEQKKAGLEEKEALYLKREIEIKEISEQIQQGQVKLKDLNRQAVELELLRNTYDALEREKQTYESQKEHLYAEVIRLGAEKDRILAEIKELEGRAQESDRLRAEIADLKAKRRIAEDLLRDIQREIEQHEIIKDNLINDIARKDAEINRKKNNVSELEQRIRELKQEISDLEDSARVALQTLEEPIKDLIPVQRQGINEDDFLNQFSNSLKVKGLDF…	hypothetical protein	slr6012_Derived by automated computational analysis using gene prediction method: Protein Homology.
NC_005232.1:66033-68225:+	NC_005232.1	HRIBO	CDS	66033	68225	+	slr6071			2193	731	Yes	NaN	NaN	NaN	NaN	NaN	NaN	0	0	0	0	0	0	0	0	ATG	TAA	ACAATTTTTTAAATT	ATGGACAGCCCCCGGCAATTGTCATCGCCTACCTTGACGAACGTTATTCCTCTTGCAGCAGGGATAATTGTCGCATTAGTAGGAATAGCCGCAAAAATTCAACCGCTTCAATCTGGAATAATGGGATTTACCGCAGGAGTCAGCGGGGCGGCAACAGCAAGTTTAGCGACAAAAAAAGAAAGGGAAATTTTGCTCTTAGCAGAACAGGAGCTTAGCAAAACAAAAATTAACAATACGCTTTCTGAGTTACAAGAACAGAAAAAAATAATTGATAAAGATATCACTCGATTAGAAGAACGCCGGAGCCAATCAGAAAAAATTGCTGGGGAGTTAGAGATTCGGCAGGCAAAGCGGGATAGCATCGAAGCCGAAATTAAAAATTTACAAGCGGTACAACAA…	MDSPRQLSSPTLTNVIPLAAGIIVALVGIAAKIQPLQSGIMGFTAGVSGAATASLATKKEREILLLAEQELSKTKINNTLSELQEQKKIIDKDITRLEERRSQSEKIAGELEIRQAKRDSIEAEIKNLQAVQQNLESRVAEINKANPTLENLEIRQKEISRLQSIIKQLEGELFAYKSKIAEMEQKKAGLEEKEALYLKREIEIKEISEQIQQGQVKLKDLNRQAVELELLRNTYDALEREKQTYESQKEHLYAEVIRLGAEKDRILAEIKELEGRAQESDRLRAEIADLKAKRRIAEDLLRDIQREIEQHEIIKDNLINDIARKDAEINRKKNNVSELEQRIRELKQEISDLEDSARVALQTLEEPIKDLIPVQRQGINEDDFLNQFSNSLKVKGLDF…	hypothetical protein	slr6012_Derived by automated computational analysis using gene prediction method: Protein Homology.
NC_000911.1:2295152-2297341:+	NC_000911.1	HRIBO	CDS	2295152	2297341	+	slr0337	SGL_RS12655		2190	730	Yes	0.132004	1.10997	0.620989	0.135442	1.09335	0.614396	3.84	17.36	29.09	15.64	29.09	15.64	3.94	17.1	ATG	TAG	ATTGCCTTATTTTCT	ATGGCCCACCCGTTGTATGTCGCTTTTGTTTGGCATCAACACCAGCCTTGCTATCAGTCCTATGGCATGGTGGGCAATGGCCATGGATATTATCAATTACCCTGGGTGCGGTTACATGGCACTAGGGATTACGGAGGGTTGATTAAGTTATGGGCCCGTTACCCTTCCCTGCATCAGACAGTTAGCTTCACTCCTTGTTTGCTAGCCCAATTGGAGGATTATGCCCAGGGTTTGGCCATCGATCGCCATTTAGCCCTCACCCTGAGCCCAGTGGAAAAGTTAAGCCTAGAGCAAAAGGTGGAAATTCTGACCACTTTTTTTGAGGCTAATCCCCGCACACAAATTTTTCCCCAGCATCGGTATCAACAGTTATACGAGCAACGTCAAAGGCAAGGGATA…	MAHPLYVAFVWHQHQPCYQSYGMVGNGHGYYQLPWVRLHGTRDYGGLIKLWARYPSLHQTVSFTPCLLAQLEDYAQGLAIDRHLALTLSPVEKLSLEQKVEILTTFFEANPRTQIFPQHRYQQLYEQRQRQGIDWCISHWQPQDFSDLLAWHNLIWFDALTIAEDRDVRDWYFRQKSFTLGDRQRIISKQRQIIQGIIPLHRQLQESGQLEIITSPYGHPILPLLADTNIARTIQAALALPDPRFCWSEDGIRQLQQGKQYYRSTFGRESRGLWPPGLAVSPAMLQTVAQLRFEWLCADESVLAQSLSTSAERSVWLNSVYRVPTEDGELAMVFRDQQLSDLISFHYGRYSPAQAAEDLMARLLARRPQAENGQPRLVTIALEGDRTWNGYENNGFGFL…	hypothetical protein	hypothetical protein
NC_000911.1:1544714-1546903:-	NC_000911.1	HRIBO	CDS	1544714	1546903	-	sll1987	SGL_RS09095	cpx, katG	2190	730	Yes	0.589141	4.74464	2.66689	0.337425	1.35948	0.848453	28.32	168.15	48.07	35.44	48.07	35.44	16.22	48.18	ATG	TAG	CGTAAGGAAAAACCC	ATGGCTAATGATCAGGTACCGGCCAGTAAATGTCCTGTAATGCACGGAGCAAATACAACCGGGCAGAACGGCAATCTCAACTGGTGGCCCAATGCGCTGAATCTAGACATATTGCATCAGCATGACCGTAAAACAAATCCTATGGACGATGGGTTTAACTATGCCGAAGCGTTTCAACAACTGGATTTAGCTGCTGTTAAACAAGACCTACACCATTTGATGACCGATAGCCAAAGTTGGTGGCCCGCCGACTGGGGTCATTATGGTGGATTAATGATTCGTATGGCCTGGCACGCTGCTGGCACTTATCGCATTGCCGATGGTCGGGGTGGGGCCGCCACTGGCAACCAACGCTTCGCCCCCCTGAATAGCTGGCCAGATAACGTCAATTTAGACAAA…	MANDQVPASKCPVMHGANTTGQNGNLNWWPNALNLDILHQHDRKTNPMDDGFNYAEAFQQLDLAAVKQDLHHLMTDSQSWWPADWGHYGGLMIRMAWHAAGTYRIADGRGGAATGNQRFAPLNSWPDNVNLDKARRLLWPIKKKYGNKLSWGDLIILAGTMAYESMGLKVYGFAGGREDIWHPEKDIYWGAEKEWLASSDHRYGSEDRESLENPLAAVQMGLIYVNPEGVDGHPDPLCTAQDVRTTFARMAMNDEETVALTAGGHTVGKCHGNSKAELIGPEPEGADVVEQGLGWHNQNGKGVGRETMSSGIEGAWTTHPTQWDNGYFYMLFNHEWELKKSPAGAWQWEPVNIKEEDKPVDVEDPNIRHNPIMTDADMAMIKDPIYRQISERFYREPDY…	catalase peroxidase	catalase peroxidase
NC_000911.1:3004454-3006640:-	NC_000911.1	HRIBO	CDS	3004454	3006640	-	sll0290	SGL_RS15845	ppk	2187	729	Yes	0.526392	5.63253	3.07946	0.34987	2.63174	1.49081	18.25	72.04	34.67	12.79	34.67	12.79	12.13	33.66	ATG	TGA	TGGTGTCCTGCCCCC	ATGATCCAAGCTATGCCCTCTGCTCCCACCGTTGACTTTAAAGATCCTGCTTACTATTTCAATCGAGAATTGAGTTGGTTAGCCTTTAATCAGCGGGTGCTCCATGAAGGTTTAGACGACCGTACCCCCTTGTTGGAACGGTTAAAGTTTTTGGCGATTTTTTGCTCCAACCTAGATGAATTTTTTATGGTCAGGGTGGCGGGGCTCAAGCAACAGGTAGAAGCGAATGTCACCAAGTTGACTGCGGATGGTCGTACTCCATCCCAACAGCTTAAAGAAATTAGCAAAAGTCTGCGGCCTTTGGTATATCAACAAAACCAGGTGTTTGAGTATGTGCTCAAGGAAAAATTAGCGGATGAGGGCATTTTCCTCAACGATTATGTAGATCTAAGCCAAGAA…	MIQAMPSAPTVDFKDPAYYFNRELSWLAFNQRVLHEGLDDRTPLLERLKFLAIFCSNLDEFFMVRVAGLKQQVEANVTKLTADGRTPSQQLKEISKSLRPLVYQQNQVFEYVLKEKLADEGIFLNDYVDLSQEERQYLHQFYDDHIFPVLTPLAVDPSHPFPYISNLSLNLGVVVRDPDTDEELFARVKVPPTLPRFVALPEDVCQPDPNKPWLWTGVPLEQVIAHNLASLFPGMIIQECHLFRVTRNADIAVEEDEADDLLLAIEEELRKRRVGKSAVRLEINASTPKNIRDRLMTDLGLEEIDVYDIDGLLGLKDLFFFLSLPAPHLKDEPWASVIPPRLKHVYEFVDGDEDGRVQQEGIDIFTLIRQGDILVHHPYQSFTASVQQFITQAAYDPHV…	polyphosphate kinase	polyphosphate kinase
NC_000911.1:102930-105110:-	NC_000911.1	HRIBO	CDS	102930	105110	-	sll0710	SGL_RS02320		2181	727	Yes	0.513391	1.81964	1.16651	0.255179	0.879402	0.567291	10.16	34.1	19.79	18.74	19.79	18.74	5.05	16.48	ATG	TAA	TTTTATTTACATATT	ATGTGGAACTTTTCGCAACTTAATCTAAAAACAAACTCAGACTTTGTAGGTATTAAATCTGAACCTGATGGATATGCTTTTTATTTACCAAAAGGTTTTGACAATTTTATTGATAAATATCAAAATGCAGCTACTTCTGAAGATACCGACAAATTCAATAAAGTCCGTGATTCTTTCTTTTTGATGTATCGAACACTAAGGAAGTTTGATCGTGATAATGAGAATAATTCAAGAGTCACAAGAAAAGATGCTAAAAACAAGAAAAACCAAGACCAGGTCAATTTAAGCACGGGTGGTATTAGTTTAGACTATAAAGAGGCAAGCGAGTGTATTTTATACAGTAAACTTTCGATGATTGAACGAATATTAGAGGCTTATGATGATTTGGCGCTCAATTCT…	MWNFSQLNLKTNSDFVGIKSEPDGYAFYLPKGFDNFIDKYQNAATSEDTDKFNKVRDSFFLMYRTLRKFDRDNENNSRVTRKDAKNKKNQDQVNLSTGGISLDYKEASECILYSKLSMIERILEAYDDLALNSIEKKARRSEEIDYSKIYKYLDRAIYLNNGAIYIDVMNLPRSMISHESTDIVDLYCFILDEIIQQLQEDVLDHIYDRSQDIQFLSQRFRDHYLTINHSLFDQDTFEETLSICKEALDNIDRNTHYKDADYWGLYEAIEIFLYGGLNPNLDDGDFWGIQGEQGFDYVWEDMCQTYFFKKNFNPIQNDFNKIGFADTDIPIVGYKNNRIRNSKHHRPESEQNRVGWWKNKSSNQWLYQKKQSEVDHPNNYKPLYWRELFCIEWDLKARI…	unknown protein	unknown protein
NC_000911.1:2128767-2130941:+	NC_000911.1	HRIBO	CDS	2128767	2130941	+	slr0288	SGL_RS11925	glnN	2175	725	Yes	1.6361	10.1657	5.90091	0.187967	0.572746	0.380356	157.72	793.74	96.4	78.08	96.4	78.08	18.12	44.72	ATG	TAG	ATAGAGATTTAGTCC	ATGACTGGAAACGCCGCCCGCACCCAATCAGTTCACCAAATCATCAATCGACCTCTATCTTCTGGCAAGAAGTTATCCCGCCTGGAAGATATGTGGGCTGAGAACGTTTTTAATTTGAGCAAAATGCAGGCCAGTCTTCCTAAAGGCGTTTTCAAATCAATTAAAAATACTATTACCACTGGCGAAAAATTGGACCCTTCCGTTGCTGATGCAGTGGCCACTGCTATGCGGGACTGGGCCATGGGGAAAGGGGCAATGTACTATGCCCACGTTTTCTATCCCATGACCAACCTCTCGGCGGAAAAGCACGATGGCTTTATTTCTGTACAGGGGGATGGCAATGTCATTTCAGAGTTTTCCGGCAAAGTTCTAGTACAAGGGGAACCGGACGGCTCTTCT…	MTGNAARTQSVHQIINRPLSSGKKLSRLEDMWAENVFNLSKMQASLPKGVFKSIKNTITTGEKLDPSVADAVATAMRDWAMGKGAMYYAHVFYPMTNLSAEKHDGFISVQGDGNVISEFSGKVLVQGEPDGSSFPNGGIRDTFEARGYTGWDVTSPAYIMETDNGSTLCIPTVFVSWTGEALDKKVPLLRSIAAMDKAARKVLSLLGNEDIAHVNSSCGAEQEYFLVDANFASQRPDLLLAGRTLFGKLPAKGQEFDDHYFGAIPERVQVFMQDVEETLYKLGIPAKTRHNEVAPGQFEIAPFFEAANVASDHQQLLMTVLKNTAKKHGFVCLLHEKPFAGINGSGKHVNWSVGNSTQGNLLDPGDSPHDNAQFLVFCGAVIRGVHKYGPLMRAAIATA…	glutamate--ammonia ligase	glutamate--ammonia ligase
NC_000911.1:2513806-2515974:+	NC_000911.1	HRIBO	CDS	2513806	2515974	+	slr0220	SGL_RS13565	glyS	2169	723	Yes	0.451262	3.63064	2.04095	0.0982029	0.729793	0.413998	24.86	77.26	55.09	21.28	55.09	21.28	5.41	15.53	ATG	TAA	TTGCTCCCTTGCCCT	ATGCCCCTGCAAACCTTTCTATTTGAAATTGGAACTGAAGAATTACCCGCCGATTTTGTTCGCAGTGCGATCACCCAGTGGCAAGGGTTAATTCCCCCAGGTTTGGCGGCGGAGTTTTTACAACCGGAGTCGGTGGAAATTTACGGCACGCCCCGGCGCTTGGCGGTGTTGATCAAAGGCTTACCAGAATGCCAGCCCGATCGCCTGGAGGAAATTAAGGGTCCTCCGGCCAGTGCCGCTTTCAAAGACGGGCAACCCACCCCGGCCGCCTTGGGCTTTGCCAAAAAACAGGGGGTCAACCCGGAGGATTTTGAGATCCGCTCCACCCCCAAAGGGGACTTTATTTTTGTCAATAAGCAATTACAGGGCCAAGCTAGCCGGGATTTGTTGCCCAAGCTG…	MPLQTFLFEIGTEELPADFVRSAITQWQGLIPPGLAAEFLQPESVEIYGTPRRLAVLIKGLPECQPDRLEEIKGPPASAAFKDGQPTPAALGFAKKQGVNPEDFEIRSTPKGDFIFVNKQLQGQASRDLLPKLALSWLKALDGRRFMRWGDGDWRFPRPIRWLVCLLDDQVLPLQIDNGSTTLVGDRLSRGHRILHPADVSLEHGQNYLAQLKTAGVVVDPQERRAMIEQQITTQAATLEGEAIIYEDLLDEVEQLVEYPTAVLGKFDQEFLSLPREVTTTVMVTHQRYFPVVDKDGRLLPHFITIANGDPSKGDIIAAGNGRVIRARLADAKFFYQADCDDSLDSYLPQLETVTFQEELGTMRDKVDRIMEMAAAIADQLGVTEQQRGEIDSTAMLCK…	glycyl-tRNA synthetase beta chain	glycyl-tRNA synthetase beta chain
NC_005230.1:24925-25509:-	NC_005230.1	HRIBO	CDS	24925	25509	-	sll7027	SGL_RS00735		585	195		3.23377	1.83946	2.53661	11.6057	15.9341	13.7699	420.39	377.31	130	205.12	130	205.12	1508.74	3268.4	GTG	TAA	GGCGAACCCTCATTG	GTGGTACTCGGGCTAAATCCTGGTGTTGGCTATCCTGAGCTTCAGTCCCGGGATGGTGTCTGGGCCAATCGTATACGGCAGACATCTTTCAGCAAATGCTTTGATCGTAGTCCCCCTGGCGATCAAGCTTGGCTCAAGCTCCATGTGAAAGAAAGTCCCTATTGGCGCAGTCTAATGAGTTTTGGTCAACGTTGCTGTGGCAACAATTTTGAGTTCAGCCAAATTCTCAATTTTGAACTTTATCCGTGGCATTCCTCTGCCCTAACATCAGCACTTAATTGTCCACCTTCTATAATTGACCTCTATGTTTTCCAGCCCCTTGCGGAAGTTCAAACTCGACACATCTTTGCGTTTGGGAAGCCGTGGGACAAAGTTTTTCAGGGTCTTGGTTTGACAGAA…	VVLGLNPGVGYPELQSRDGVWANRIRQTSFSKCFDRSPPGDQAWLKLHVKESPYWRSLMSFGQRCCGNNFEFSQILNFELYPWHSSALTSALNCPPSIIDLYVFQPLAEVQTRHIFAFGKPWDKVFQGLGLTEVRRYGDGFQPLPGVSTPGWTVVIFRSALMTVPIIVSWQQGYAGPPGKPRLQALRAIIENEG	unknown protein	ORF_ID:sll7027
NC_000911.1:3061357-3063522:+	NC_000911.1	HRIBO	CDS	3061357	3063522	+	slr0798	SGL_RS16100	ziaA	2166	722	Yes	0.380035	1.59298	0.986509	0.273205	1.99649	1.13485	4.34	9.08	11.42	5.7	11.42	5.7	3.12	11.38	ATG	TAA	ATCACGTTGGCCGCC	ATGACCCAATCTTCACCGCTCAAAACTCAGCAAATGCAAGTCGGCGGCATGGACTGCACTAGTTGCAAGTTAAAAATTGAAGGTAGCTTGGAAAGATTGAAGGGAGTAGCAGAGGCCTCTGTCACGGTGGCCACGGGACGATTAACTGTTACCTATGATCCCAAGCAGGTCAGTGAAATAACCATTCAAGAACGGATCGCCGCCCTGGGTTACACCCTTGCAGAGCCAAAATCATCTGTAACGCTTAATGGTCATAAACATCCCCACTCCCATAGGGAAGAAGGCCATAGCCATAGTCATGGTGCTGGTGAATTTAATCTGAAACAAGAACTACTGCCCGTCCTGACGGCGATCGCCCTCTTTACCATTGCTATTTTGTTCGAGCAACCGTTACACAAC…	MTQSSPLKTQQMQVGGMDCTSCKLKIEGSLERLKGVAEASVTVATGRLTVTYDPKQVSEITIQERIAALGYTLAEPKSSVTLNGHKHPHSHREEGHSHSHGAGEFNLKQELLPVLTAIALFTIAILFEQPLHNTPGQIAEFAVIIPAYLLSGWTVLKTAGRNILRGQIFDENFLMTIATLGALAIHQLPEAVAVMLFFRVGELFQEYSVGRSRRSIKALLEARPDTANLKRNGTVQQVSPETVQVDDLILVKPGEKVPLDGEILGGTSQVDTSALTGESVPGTVKPGDTILAGMINQSGVLTIRVTKLFSESSIAKVLDLVENASSKKASTEKFITQFARYYTPVIVFLSLAVALLPPLFIPGADRADWVYRALVLLVISCPCGLVISIPLGYFGGIGG…	zinc-transporting P-type ATPase (zinc efflux pu mp) involved in zinc tolerance	zinc-transporting P-type ATPase (zinc efflux pump) involved in zinc tolerance
NC_000911.1:3140713-3142875:-	NC_000911.1	HRIBO	CDS	3140713	3142875	-	sll0045	SGL_RS16460	spsA	2163	721	Yes	0.426913	2.63537	1.53114	0.174863	1.87637	1.02562	6.25	16.84	14.64	6.39	14.64	6.39	2.56	11.99	ATG	TAA	TAATTTGTAAAACTT	ATGAGCTATTCATCAAAATACATTTTACTAATTAGTGTCCATGGTTTAATTCGGGGAGAAAACCTTGAGTTGGGCAGAGATGCCGACACCGGCGGGCAAACCAAATATGTGCTGGAACTGGCCCGGGCCTTGGTAAAAAATCCCCAGGTGGCCAGGGTGGATTTGCTGACCCGTTTAATTAAAGATCCCAAAGTAGATGCAGATTATGCCCAGCCTAGAGAACTTATTGGCGATCGGGCCCAGATTGTTCGCATTGAGTGCGGCCCGGAGGAATATATTGCCAAGGAAATGCTCTGGGACTATTTGGATAATTTTGCTGACCATGCCCTGGACTATCTCAAAGAACAGCCCGAACTGCCCGATGTCATCCATAGCCATTACGCCGATGCGGGTTACGTG…	MSYSSKYILLISVHGLIRGENLELGRDADTGGQTKYVLELARALVKNPQVARVDLLTRLIKDPKVDADYAQPRELIGDRAQIVRIECGPEEYIAKEMLWDYLDNFADHALDYLKEQPELPDVIHSHYADAGYVGTRLSHQLGIPLVHTGHSLGRSKRTRLLLSGIKADEIESRYNMARRINAEEETLGSAARVITSTHQEIAEQYAQYDYYQPDQMLVIPPGTDLEKFYPPKGNEWETPIVQELQRFLRHPRKPIILALSRPDPRKNIHKLIAAYGQSPQLQAQANLVIVAGNRDDITDLDQGPREVLTDLLLTIDRYDLYGKVAYPKQNQAEDVYALFRLTALSQGVFINPALTEPFGLTLIEAAACGVPIVATEDGGPVDIIKNCQNGYLINPLDEV…	sucrose phosphate synthase	sucrose phosphate synthase
NC_000911.1:96325-98481:-	NC_000911.1	HRIBO	CDS	96325	98481	-	sll1043	SGL_RS02295	pnp	2157	719	Yes	0.683258	5.3614	3.02233	0.108953	0.750145	0.429549	66.85	276.38	97.84	51.55	97.84	51.55	10.66	38.67	ATG	TAA	AGGAAAACACGTTAA	ATGCAAGAGTTTGACAAGTCCATATCCTTCGACGGACGGGATATAAGACTCAAAATGGGAACCCTAGCCCCCCAAGCAGGAGGTTCAGTCCTCATTCAATCCGGCGATACAGCGGTGTTGGTCACGGCGACCAGAGCTAAAGGAAGGGATGGCATTGATTTTCTACCCTTAACGGTGGACTACGAAGGACGACTCTATGCCGCAGGCCGTATTCCGGGCGGTTTTTTGCGGCGGGAAGGCCGACCCCCAGAAAAGGCCACATTAATCAGCCGCCTCATTGACCGTCCTTTGCGTCCCCTATTCCCCCATTGGCTGCGGGATGAACTGCAAATAGTAGCCACCACCCTCTCCATGGATGAGGAAGTGCCCCCCGATGTGTTAGCGGTGACCGGGGCTTCC…	MQEFDKSISFDGRDIRLKMGTLAPQAGGSVLIQSGDTAVLVTATRAKGRDGIDFLPLTVDYEGRLYAAGRIPGGFLRREGRPPEKATLISRLIDRPLRPLFPHWLRDELQIVATTLSMDEEVPPDVLAVTGASVAVILAQIPFKGPMAAVRVGLVGDDFIINPTYREVHNGDLDLVVAGTPAGIVMVEAGANQLPEQDIIEAIDFGYEAVQDLINAQRELMTDLGITLATSEPPPVNTAVEEFIANRASKKIITVLGQFDLGKDGRDAALDEIKATEVETAIAELPETDPVKQSVEEDPKLVGNLYKALTKKLMRKQIVDDGVRVDGRKLEQVRPISCEVGFLPRRVHGSGLFNRGLTQVLSLATLGSPGDAQDLADDLHPEDEKRYLHHYNFPPYSVG…	polyribonucleotide nucleotidyltransferase	polyribonucleotide nucleotidyltransferase
NC_000911.1:1293398-1295551:+	NC_000911.1	HRIBO	CDS	1293398	1295551	+	slr1816	SGL_RS07930		2154	718	Yes	0.829431	3.12043	1.97493	0.677534	2.27348	1.47551	55.97	87.06	67.48	27.9	67.48	27.9	45.72	63.43	ATG	TAA	TAAATTATCAAACAA	ATGAAAATTGAAAAGCAAGTTAATGATTTAAGAATAATTGAACTTGAAAAAGAACTGGAAAATAATCCTTTTATCCCTATTTTATATTGGGAGTTAGGATTGAATTATCTTATCTCTGTAGGGGAAGAAAAAGCGGAAGAAATTTGGTCGCTGGGTTTGTTGCAATGCTTTACATCTTTTGATGAAGGGTTGCTTTCACTAGTTGGCTTTATTGAACAACACATAGAGCTTAATAAAAATGATAAACAAACAGTGTTGATATTATGGCAACAGATAATCAAGATAGTCCCCAATTACCTGGCAGGACATCTAAATTTACTTGTTGTTGCCTGTGAGCTTAAGGTATTCTCGGCTGAGAAGCTGGCTTATTTAGGCACAGTTGCGTTAATTAATTCTATT…	MKIEKQVNDLRIIELEKELENNPFIPILYWELGLNYLISVGEEKAEEIWSLGLLQCFTSFDEGLLSLVGFIEQHIELNKNDKQTVLILWQQIIKIVPNYLAGHLNLLVVACELKVFSAEKLAYLGTVALINSIDSGCISQQEEELLLRATLSILEFPTALSLDFLRSSIPLLVNLPWCDAVMAFANSMVYDKQLFSYGVEIAEICLQYSPNNLFILNDLIRFYGLRKDQDALLRTARNLLNIFRQQDFEPDFGFYLSSRLLSAFMTGNDWEQVQSIASIFKDYFILLQNEKSVVLNNFLRDRFWGLGFSLLYLFDEPESNRRCLNFNASIFQQNLTENQNKTICQEENLPKKKQVSLKRIGYIAHTLRQHSVGWLCRWLFKYHDREKFEIFVYLIGQPE…	hypothetical protein	hypothetical protein
NC_000911.1:785665-787812:+	NC_000911.1	HRIBO	CDS	785665	787812	+	slr1135	SGL_RS05530		2148	716		1.17375	2.42279	1.79827	0.548983	1.56801	1.0585	6.35	13.18	5.41	5.44	5.41	5.44	2.97	8.53	ATG	TAA	AACATTAGGTAAGCT	ATGATTGAAGATAATCAGTCCCACAATGAAAATATTAAAGAATATCTTAATTACTATAAAAAATTAGATTCTCCTGGTTTCGCCATTCTTTTAAAAGGTGAATGGGGATGTGGAAAAACCCATTTTATCAAGAATTATTTTCAATTGGAAGACAAAGAAAATAATGAAAGTTTTAATTTTAAAAAGAAATATTTTTCATTAAAAAACAATCAGCATAAGGAAAATTCAAAAGCAATATATATTAGTTTGTATGGAATTAAGGATATAGAATCTATTGATATTCTCATTATACAAAAACTTATACCCATCTTGGCAGATAGGAAAATTCAATTAACTGGCTCTGTTATAAATATTCTTTTAAAATCTTCATTGAAAATTGATTTAAAAGACTTAAAAAAT…	MIEDNQSHNENIKEYLNYYKKLDSPGFAILLKGEWGCGKTHFIKNYFQLEDKENNESFNFKKKYFSLKNNQHKENSKAIYISLYGIKDIESIDILIIQKLIPILADRKIQLTGSVINILLKSSLKIDLKDLKNTKILNEFTNLDNKILILDDLERCKIDINDLLGYINFFVEHQALKVILIADEDKIEGNIIQSYETKTFDKIKEKVIGKRFTVNTSFNKAFEQFLNLVCKDEQEKTYLSKKRDFIKELFETSDSNNLRTLKSIIYDFDRIYSYLPEKALNNIDFLDDLLKSLTILSIETKLGNLPEDQIKILSDIYGEYSSNIASNYTKISEKVKENYKYEHFFTFCHRLQYKYVFSFEYFLPNYLWWGEFFEHGIIDKQALYHTFINSKYYVSQDSE…	unknown protein	unknown protein
NC_000911.1:2260429-2262576:+	NC_000911.1	HRIBO	CDS	2260429	2262576	+	slr0993		nlpD	2148	716		2.39157	8.57362	5.48259	0.509841	0.950207	0.730024	383.99	1201.85	160.56	140.18	160.56	140.18	81.86	133.2	ATG	TAA	TGTCCATCTCCGCCT	ATGGAGATTAATTCCTATGATGGAAGCACTAAACAGGAGGGTACTGTGCCCCTGGGCGAAGGATACCGTCGGGTTCGCCGCTCTGCTGCAATGGTGGGTTTAGCCGTTTCCATGGGAGCAACGAGTATGTTGTTTTCCCAAACCGCCACCGCCGCCGCCAGTTCTGGCAACTCCCCCTTGGTTGCGGTGAGTAATTTATCCCTAGACCAATCCCATGGCTCCTCCACTGAGCCGATGCTGGCTTCCCCTTCCCTGAAGCACCAAGTCAAAGAAGGAGAGTCCCTTTGGCAAATTAGCCAAGCTTTTCAAGTGGACGCCAAGGCCATTGCCCTGGCCAACAGCATCAGCACTGATACGGAACTACAAGCGGGACAAGTACTGAATATTCCCAGACCTAGT…	MEINSYDGSTKQEGTVPLGEGYRRVRRSAAMVGLAVSMGATSMLFSQTATAAASSGNSPLVAVSNLSLDQSHGSSTEPMLASPSLKHQVKEGESLWQISQAFQVDAKAIALANSISTDTELQAGQVLNIPRPSSSAKAVQDQVPAATIPPLAPLEQTDSMVVSSSLAPGQSSSTANTTAVKPKAQTLVADVSRPMQGTVIEPLEEKLTSQRIKSTAEDAGIKLDTKASLPSPVEVAAAAHGDRPIPIAVVGPEEFTAIEVQPSSSPANPQSLPVPALPAVAPAPTRAQRQDESLASGEDISLDNLRQNGMAQPVQPVETALNLDQPVAIAVIPPETEPEIITRSPLPSAPVVLETGPAVAALPSPSNVAPASAEQISYQVKPGDTLSQIARSHDIQPEK…	putative peptidase	putative peptidase
NC_000911.1:2314780-2316924:-	NC_000911.1	HRIBO	CDS	2314780	2316924	-	sll0169	SGL_RS12755		2145	715	Yes	0.729637	2.21288	1.47126	0.805838	3.15563	1.98074	91.73	244.7	125.72	110.58	125.72	110.58	101.31	348.95	GTG	TAG	CCAAGGCTTTTTCCG	GTGTTTATCCCCCTCGACTTTTATCGTATTTTAGGCATTCCTCCCCAGAGTGGTGGGGAAACCATTGAGCAGGCCTACCAAGATCGCCTTTTACAATTACCCCGGCGAGAATTTAGTGACGCCGCAGTTACTCTCCGCAATCAATTACTGGCGATCGCCTATGAAACCCTGAGGGATCCGGAAAAACGTCAGGCATACGACCAAGAATGGTGGGGAGCCATGGATGAAGCCCTGGGGGAGGCCTTACCCCTCACTACCCCGGAGTTGGAATGTAGCCCAGAGCAAGAAATTGGAGCCCTGTTGATCCTGTTGGATTTGGGGGAATACGAACTCGTGGTTAAGTATGGTGAGCCAGTACTCCACGATCCCAACCCTCCGGCGGGAGGCCTGCCCCAGGAC…	VFIPLDFYRILGIPPQSGGETIEQAYQDRLLQLPRREFSDAAVTLRNQLLAIAYETLRDPEKRQAYDQEWWGAMDEALGEALPLTTPELECSPEQEIGALLILLDLGEYELVVKYGEPVLHDPNPPAGGLPQDYLLSVILAHWELSRERWQQQQYEFAATASLKALARLQQDNDFPALEAEIRQELYRLRPYRILELLAKEGQGEEQRQQGLALLQAMVQDRGGIEGKGEDYSGLGNDDFLKFIHQLRCHLTVAEQNALFLPESQRPSLVASYLAVHSLMAEGVKEQDPMAIVEAKSLIIQLENCQDLALEKVICELLLGQTEVVLAAIDQGDPKIVAGLESKLATGEDPLTAFYTFTEQWLEEEIVPYFRDLSPETLSPKAYFNNPSVQQYLEQLEPD…	cell division protein Ftn2 homolog	cell division protein Ftn2 homolog
NC_000911.1:1002633-1004777:-	NC_000911.1	HRIBO	CDS	1002633	1004777	-	sll1454	SGL_RS06575	narB	2145	715	Yes	0.343768	3.12223	1.733	0.0110248	0.0748424	0.0429336	60.18	153.52	175.06	49.17	175.06	49.17	1.93	3.68	ATG	TAA	ACTGCCAATATTTTA	ATGGATTCACCAGCTATTCTTCCCACCACCAGAACCCTTTGTCCTTACTGTGGAGTTGGTTGTGGTTTGGAGGCTGTTGCTAGTCCCCAAAAGTCGGTAGTTGATGCCGGTCATGCCCATAAAATTAGAGGCGATCGCCAGCATCCTTCCAGCCAAGGCATGGTCTGCGTCAAAGGAGCTACCGTAATGGAATCCATGGATAAACAGCGATTACTTTACCCCATGTTTCGGTCAAGTTTAGATCAGCCGTGGCAACAAATTAGTTGGGAAGCAGCCCTAGAAATTGTTGTTGATAAAATTCAGCAAGTTAAACAAACTTTGGGGGTAAGTGGTTTATGTATGTACGCCTCTGGGCAAATGCAGACAGAGGATTACTACGTGGCCCAAAAATTATTTAAA…	MDSPAILPTTRTLCPYCGVGCGLEAVASPQKSVVDAGHAHKIRGDRQHPSSQGMVCVKGATVMESMDKQRLLYPMFRSSLDQPWQQISWEAALEIVVDKIQQVKQTLGVSGLCMYASGQMQTEDYYVAQKLFKGCLGTNNFDTNSRLCMSSAVSAYSLSFGSDGPPCCYEDLEITDCAFLIGTNTADCHPIIFNRLRKHHKQNPHVKLIVVDPRCTATAEVADLHLAINPGSDITLLHGIAYLLKKWNLIDQKFIDNHTQDFEQYCQVIDHYPPEKVTQICGISLEQLETAAHYWGNAKTVLSLWSMGMNQSFQGTAKGRCLINLHLLTGQIGKPGSGPFSLTGQPNAMGGREAGGLSHLLPGYRSIKNPQHRQEVEQLWQISPGRINPEPGLSAWEMF…	ferredoxin-nitrate reductase	ferredoxin-nitrate reductase
NC_000911.1:3336407-3338548:+	NC_000911.1	HRIBO	CDS	3336407	3338548	+	slr0659		prlC	2142	714	Yes	0.612105	6.84629	3.7292	0.133731	0.807411	0.470571	40.05	149.66	65.43	21.86	65.43	21.86	8.75	17.65	GTG	TGA	GCCAAAATTTAGGGA	GTGGTTTATCCACAAACCTTTTTCCTGCGACTTAAACCTTTCCGTTTTTCCATCACCATGACCCACACCGCCGTTGCCAATCCGCTCCTTCAAGGCCGGGACTTGCCTGCCTTTGACAAAATTCAACCCACCGATGTGGAGCCCGCAGTGACTACCCTGGTGCAGGAATTAGAAGCCCAATTAACTGAGTTAGAAAAATCTGTGCAGCCCACCTGGGAAGGATTGGTGGAACCTCTGACGGCCCTGGAAGAAAAACTGAGTTGGACCTGGGGCACCGTTTCCCATTTGATGGGGGTGAAAAATAGCCCCGAATTGCGCCATGGCTTTGAACAAGTGCAACCGTTAGTGGTAGGTTTCATTAGTCGGTTGGGGCAGAGTCGTCCCCTTTATGAAGCCTTT…	VVYPQTFFLRLKPFRFSITMTHTAVANPLLQGRDLPAFDKIQPTDVEPAVTTLVQELEAQLTELEKSVQPTWEGLVEPLTALEEKLSWTWGTVSHLMGVKNSPELRHGFEQVQPLVVGFISRLGQSRPLYEAFVALRDSAEWGNLEPAQQRIVESNIREAELGGVGLTGEKRDRFNAIQLELAELATKFSNNVLDASQAFELKLTTKEEIAGLPPSLLALAAQTAQQKGEDNATPEEGPWLITLDYPSYLPFMKYSQREDLREKVYRAFIRRAADGQWDNHPLIERILALRLEKAQLLGFETYAELSLSRKMAPNVAAVEKLLEELRVPSYKAAEQEFADLQKFAGVEELHHWDTAYWSERQREQEFDFDAEALRPYFPLPQVLEGLFALAKRLFGVTI…	oligopeptidase A	oligopeptidase A
NC_000911.1:606465-608594:-	NC_000911.1	HRIBO	CDS	606465	608594	-	sll1929	SGL_RS04705	comE	2130	710	Yes	0.301027	0.716279	0.508653	0.325187	1.97054	1.14787	10.84	13.86	36.01	19.35	36.01	19.35	11.71	38.13	ATG	TGA	TATGGAGTTAAACTG	ATGCGCTTCCATCCCCTGGCCTTAATTTGTCTTAGCTTTATTCTGGGATTGTTGGGGACGGGGCTTGATGTTGATTTTTTCAATCTTAATCAATTGATTGTGCTGGCTGGGCTGTGGTTTTTTGCTACGACGATCGCCATTATTTTTCTACCCTTAGTTTGGCGACGGGGCCCAACCAGATGGCAATGGTTACTGGCGGGAATAATTGCGTTGCTGGCCAGTTATTACGCCCTTTGGCGCATGCCCCAGCCTGGTTTAACTGACATTAGCCGCCTTCTAGATCCTCCGGCCAAAAGTTTTCAGACCATCACGGCGATCGGTACATTGAAGGCTGGAGGGAGAGAAAACGCCCAAGGGCAACAACAATTTTGGCTCAAGGTAGAGCAGCTGCAACGGCCG…	MRFHPLALICLSFILGLLGTGLDVDFFNLNQLIVLAGLWFFATTIAIIFLPLVWRRGPTRWQWLLAGIIALLASYYALWRMPQPGLTDISRLLDPPAKSFQTITAIGTLKAGGRENAQGQQQFWLKVEQLQRPPEKEFRPRSGTVYLTLPMGEQPWQQCQQIRVTGLLYRPSTPQNPGAFNFAQYLARQGIFAGLRGETATLVGEKFCGLNPLRQRIVNAQTAWLPVQGQGQWPGLLISSIVLGAKAVNLPTELRNLFQSVGLSHFLAASGYQVSLLVGTVLLLGKKAGVSSKLAIAVGLITLAFYLGLTGLEPSVIRASLLWVGVMAALASEQKLNTVGALLLIATVMLLVNPVWSQALGFQLSFLATLGIVVMVPPLQQRLDFLPGKIAGVIAVPLA…	competence protein ComE	competence protein ComE
NC_000911.1:1194653-1196776:+	NC_000911.1	HRIBO	CDS	1194653	1196776	+	slr1857	SGL_RS07435	glgX	2124	708	Yes	0.668927	6.16817	3.41855	0.23224	1.2811	0.756672	60.17	198.8	89.95	32.23	89.95	32.23	20.89	41.29	ATG	TAA	TTTTAGCAGGACACC	ATGGAACGCATAGATATTCATCCCACCCACACCGCTAACGGTTACAAACTCCGCTGTGGCCAGCCCTTTCCCTTTGGGGCCACCATTGTGCCGGGGGGAGTTAATTTTTCCATTTACTCTAGCCATAGCACCGCTTGCACCCTAGTACTGTTCGAGAAGCGGGCTCCCCAGCCCTTTGTGGAGATTCCCTTTCCAGAATCTTTTCGCATTGGTAATGTCTATTGCATGGTGGTGTTTGACCTGGATTTTGAGAATCTGGAATACGGCTATCGCATGGAAGGCCCCAATAACTTCCAGCAGGGCCATTGGTTTGACCCCAGTAAAGTCCTTCTTGATCCCTACGCCAAAGTGGTCAGTGGCCGGGATGTTTGGGGCACCCAACCCAATTGGGACGATATT…	MERIDIHPTHTANGYKLRCGQPFPFGATIVPGGVNFSIYSSHSTACTLVLFEKRAPQPFVEIPFPESFRIGNVYCMVVFDLDFENLEYGYRMEGPNNFQQGHWFDPSKVLLDPYAKVVSGRDVWGTQPNWDDIYQHRGRLSFDDFDWENDSPLDVPLEDMVIYEMHVRGFTKDPSSGVKENHRGTFAGILSKIPYLQELGVNTIELMPIFEFDEFEHSRYHPETGEFLVNYWGYSTVNFFAPKAGYAATGKFGMQIDELKNLVKELHKVGISVILDVVFNHTAEGNERGPTISFRGLDNKTYYMLTPEGYYFNFSGTGNTLNCNNPIVRGMVLDCLRYWTAEFHIDGFRFDLASILGRDPWGYPLANPPLLETLAFDPILARSKLIAEAWDAGGLYQVG…	isoamylase	isoamylase
NC_000911.1:200405-202525:+	NC_000911.1	HRIBO	CDS	200405	202525	+	slr1103	SGL_RS02815		2121	707	Yes	0.982135	6.05722	3.51968	0.263617	1.85343	1.05852	45.08	137.62	45.9	22.72	45.9	22.72	12.1	42.11	ATG	TAA	CCCATCCTTGCTGTT	ATGACTAACCTGCCTGAATTTCGACATATATTTGTGATCGAAGATCAAAAAGCCCGTCGTATTATTTCCTTGGACGAACCCACCTATTCCATTGGACGGGAATCCAGCAATGATATTGTCATTTACGACCAGGTAGTATCCCGCCACCACGCCACCCTAATTCGCATCAAACCCACCTCCCAAAATGAAGGTTATTCCTACCGGATTTTAGACGGGGATTTGGAGGGCAATCGCAGTACCAATGGTCTGATTATCAATGGACAGGATAGTGAATCCCACGACCTGCAACACGGGGATGTGATTTTATTTGGTAGTCAGTCCAAGGCTAGTTACTACATCGTTTCCACTTCCTTGGAAATTGCCATGTTCAACCCCCTGGAGGCCATGTCCTTAGAAGAC…	MTNLPEFRHIFVIEDQKARRIISLDEPTYSIGRESSNDIVIYDQVVSRHHATLIRIKPTSQNEGYSYRILDGDLEGNRSTNGLIINGQDSESHDLQHGDVILFGSQSKASYYIVSTSLEIAMFNPLEAMSLEDLSRQSLGEYTSKSTIINEQEQEASRLAPSSADLVRFSSFAELSPHPIVEIDFNGKIVYLNPPASIKFRDINDLGVSHPILEGLLNQAQNVRGNLLLREVKSGDECYEQYVHYLTENQIIRSYLIDITRRQQAEDSLAQHTFYDPMTGLPNHAFFEEQLAIALAKVQRDQSRLAILFLNFYNYERMINAFGLGCGEILLKTVAKRLSQWTEKRGLACRWQGKQFAILLKEPGDNQALTEMVKEMLAMLEESIDVAKQKIHLKGKVGI…	hypothetical protein	hypothetical protein
NC_000911.1:3285051-3287168:-	NC_000911.1	HRIBO	CDS	3285051	3287168	-	sll1336	SGL_RS17085		2118	706	Yes	0.426492	2.51873	1.47261	0.384628	1.45031	0.917469	52.16	170.82	122.3	67.82	122.3	67.82	47.04	98.36	ATG	TAA	ACTTCTTCTTCAACC	ATGGCTGACGATATTCGCATTTTGATGTGCCCCCCCGACCACTACGACGTGGACTATGTAATTAATCCTTGGATGGAGGGCAATATCCACAAATCCTCCCAGGAGCGGGCCGTAGAGCAATGGAAAAAACTACACCAGACCATCAAAGAATGCGCCATCGTGGACTTGGTGAAGCCGGCAAAGGGTTGGCCTGATATGGTCTTTACCGCCAATGCGGGGCTGGTGCTAGGGGAAAATGTCGTACTGAGTCGCTTCTACCACAAAGAACGCCAGGGGGAAGAACCCTATTTCAAAGCTTGGTTTGAGGAAAATGGTTTCACCGTTTACGAACTGCCCCAGGATTTACCCTTTGAAGGGGCCGGGGATGCCCTGTTTGACCGGGAAGGCCGTTGGTTGTGG…	MADDIRILMCPPDHYDVDYVINPWMEGNIHKSSQERAVEQWKKLHQTIKECAIVDLVKPAKGWPDMVFTANAGLVLGENVVLSRFYHKERQGEEPYFKAWFEENGFTVYELPQDLPFEGAGDALFDREGRWLWAGYGFRSELDSHPYIAKWLDTEVVSLRLIDERFYHLDTCFCPLSGGYLLYYPPAFDAYSNRVIEMRIPPEKRIIVEELDAVNFACNAVNVNDIIIMNLVSRTLKEKLAEAGFKVRETPLTEFLKAGGAAKCLTLRVTEPILPDVHATVSIESRVIRMEGHLLDAGILNQALDLVVENSGSFRVLNFNLGVERNSTSSAEVRVSAPSHQIMEEIMTELIDLGAVPPPQELCDINTETVTQGGVAPDDFYVSTIYPTEVRVNCEWVQV…	hypothetical protein	hypothetical protein
NC_000911.1:2378981-2381095:+	NC_000911.1	HRIBO	CDS	2378981	2381095	+	slr0378	SGL_RS12940		2115	705	Yes	0.251118	2.19862	1.22487	0.195046	1.29862	0.746834	7.3	31.88	29.07	14.5	29.07	14.5	5.67	18.83	ATG	TAA	AGATTTTCAGGACCA	ATGCTGGTGCAAATACGGGGTAAATTACGGCGGGGCGTAGGACTGGTATTACTATTCGTTCTCACAGTGGGGTTGGGCATTGGTAACCCAGTGTGGGCCAATGGTAAAACGGAAATTTTTTGGGATAGCTGGGGAGTACCCCATATTTTTGCTGCCAATGAAACCAAGTTAATGGAGGCTTTTGGTTGGGCCCAGGCCCGGGGCCACGGAGATTTACTCCTCACCTTGTATGGGGAAGCAAGGGGCAAAGGAGCGGAATATTGGGGCATTGATTACCTTGACAATGATCAGTATGTCCATACGATGAATATCCCTCGGCGATCGGAGGTGTGGTTAAATGCCCAAACCCCAGCCATGCGCCGTGATCTGGAAAGTTTTGCCCAGGGTATCAATAATTAT…	MLVQIRGKLRRGVGLVLLFVLTVGLGIGNPVWANGKTEIFWDSWGVPHIFAANETKLMEAFGWAQARGHGDLLLTLYGEARGKGAEYWGIDYLDNDQYVHTMNIPRRSEVWLNAQTPAMRRDLESFAQGINNYFQQHPDFSQPSLRQVLPITAQDVVAHVQRLLLFEFVTNPQAVASLAGQIPEANVPIASNAWAIAPKQTESGHGLLLINPHLPWGGQFRLTEAQLVAPGMDLTGAAFVGTPVPAMGFNNDLGWSLTVNYPHNVGKYALTLAEGGYEWDGEVKSFDRRNNQVKILQGNGSYQTLQWEALESVTGIVVAQRGGNAYTLKIPGLDRSGAISQFLHMGKAKTLEQFEAAWQKQQIPMFNVLYSDRQGNIFYLYNTLTPIREGSWQDWDRLQ…	similar to 7-beta-(4-carbaxybutanamido)cephalos poranic acid acylase	similar to 7-beta-(4-carbaxybutanamido)cephalospor anic acid acylase
NC_000911.1:1278431-1280542:+	NC_000911.1	HRIBO	CDS	1278431	1280542	+	slr1805		hik16	2112	704	Yes	0.787117	1.16735	0.977235	0.780499	1.72483	1.25266	35.68	42.55	45.33	36.45	45.33	36.45	35.38	62.87	ATG	TAG	GCCTTAGCCTACGGA	ATGTTGGGCCGTGGACAACAATGGCTTAGTTTGGGGTTGGGGCAGGGTATGGCGCTGGCGCTGTGGTGGCAGGGAACGAACATTATCGCCCTTGCTCTGGGTTTAACCATTGCCCCCATGGTAGTGCAGGGAGATCCACCTCTGGCATTGGCCCTAGGGATGATTAGCACGGCGGTGGTGCTGATGGCCGGTCGGGGACTAAAAATGCTGGAGTTTTCTCCCCAGGGTCAACGACTCCAAGATGGCATGGTCTTTTTGCTGGCGGGGGTGGGGCTGGGGGCCACTCTGACGGCGATCGCCGCGCTTTTGCTATCTCTCTGGCAGGGGGATGGTCGTATTTGGTGGACAGGATCTTTGGCCTGGTTGGGCAGTGCCACCGGAATTTTGCTGGCCGCTCCT…	MLGRGQQWLSLGLGQGMALALWWQGTNIIALALGLTIAPMVVQGDPPLALALGMISTAVVLMAGRGLKMLEFSPQGQRLQDGMVFLLAGVGLGATLTAIAALLLSLWQGDGRIWWTGSLAWLGSATGILLAAPLLFKLRYGRWSWPWSARMERLQLVEALVCAGLLLMLAWLIFAGDDLIPLADRGAIYTQWLEYLPFPIVVWASIRFPIWGGILSTSGLALLAITATVQGNGSFNVQSADQSGAMILLQMFFLVLGTTSLLLSVAVRERRRTEEQLRGSWERERLLAEVALRVRQSLHLGTIFQTTVTEVRHLLQTDRVYIALLQGNSPLAVVAESCGPAYKTSLNSQIAASPNPEEMIVKTIPTEAMVVHHPDQLPKGDPLRRSFLRYQVKSLLAIP…	two-component sensor histidine kinase	two-component sensor histidine kinase
NC_000911.1:2684959-2687055:+	NC_000911.1	HRIBO	CDS	2684959	2687055	+	slr0415		nhaS5	2097	699	Yes	0.163944	1.38801	0.775977	0.130105	1.36199	0.746048	2.81	12.27	17.14	8.84	17.14	8.84	2.23	12.04	ATG	TAG	ATCTCCACCCACTTT	ATGGATGGCCTATTCGCACCAATTCCGAGTAACCCTTTAATTGACTTCACTATTTTATTATTGGTGACCCTGATCCTGCCGCCCATTTTTGAGCGCTTGAAATTACCAGGACTGGTGGGACTTTTGTTTGCCGGCATTGTGTTGGGCAAAAGTGGTTTGGGGGTGCTGAATGAAGATTCGGAAAGCATCAAACTCTTCACCGACATCGGCAAAATTTACCTGATGTTTGTAGCGGGGCTGGAAATTGACATGGTGGATTTCCGCCGGACCAGGAACCGTTCGCTACTGTATGGTTCCCTCACCTTTGCGGTGCCATTGCTGACGGGGTTGGCGGTGGGGTTGACCTTTGGCTATTCCTTCAATGCGTCTGTGTTGCTCGGCTCTCTGTTTGCTTCCCAT…	MDGLFAPIPSNPLIDFTILLLVTLILPPIFERLKLPGLVGLLFAGIVLGKSGLGVLNEDSESIKLFTDIGKIYLMFVAGLEIDMVDFRRTRNRSLLYGSLTFAVPLLTGLAVGLTFGYSFNASVLLGSLFASHTLLGYPIVQRLGIVRNQAVMVTIGATIFTDIAALLVLAICISIHSGSFSPAGLVVQLVAIAVYSALVLIGFDWAGREYFRRTGDEQSNQFLFVLLAVFLASVGSELINVDKIVGAFLAGLAVNDVLGNSPVKEKVEFLGTTLFIPFFFIGIGLLLDLPAFLVTLTTLFPLVVAIVVGLILSKGVAAILAQWKLGYTWVEGLTMWSLSIPQVAATLAAAVAGYQAVNAAGDRLVSETVLNTIIVLMLITSIVGPLMTAKFAPKIPIP…	Na+/H+ antiporter	Na+/H+ antiporter
NC_000911.1:1250442-1252535:+	NC_000911.1	HRIBO	CDS	1250442	1252535	+	slr2132	SGL_RS07720	pta	2094	698	Yes	0.770601	4.20183	2.48622	0.63363	3.15291	1.89327	6.92	13.74	8.98	3.27	8.98	3.27	5.69	10.31	ATG	TAA	GAGGTTATTTAAATT	ATGACGAGTTCCCTTTATTTAAGCACCACCGAAGCCCGCAGCGGTAAATCTCTAGTAGTATTGGGCATTTTAGACTTAATTCTCAAAAAAACCACCCGTATTGCCTATTTTCGTCCCATTATTCAAGACCCAGTTAATGGCAAACATGATAACAACATTATTCTGGTGCTGGAAAATTTTCGTCTCCAACAAACCTATACCGATTCCTTTGGTTTGTATTTCCATGAAGCGGTGAGTTTAGCCTCCGATGGAGCTATTGATCAGGTATTAGACCGAATTTTGGCTAAATATCGCCATTTGGCAGATCAAGTAGATTTTATTCTCTGTGAAGGCTCAGACTATTTGGGGGAGGAATCGGCTTTTGAATTTGATCTCAACACCACGATCGCCAAGATGTTG…	MTSSLYLSTTEARSGKSLVVLGILDLILKKTTRIAYFRPIIQDPVNGKHDNNIILVLENFRLQQTYTDSFGLYFHEAVSLASDGAIDQVLDRILAKYRHLADQVDFILCEGSDYLGEESAFEFDLNTTIAKMLNCPILLLGNAMGNTIADSLQPIDMALNSYDQESCQVVGVIINRVQPELATEIQAQLEQRYGDRPMVLGTIPQDIMLKSLRLREIVSGLNAQVLSGADLLDNLVYHHLVVAMHIAHALHWLHEKNTLIITPGDRGDIILGVMQAHRSLNYPSIAGILLTADYHPEPAIMKLIEGLPDAPPLLLTSTHTHETSARLETLHPALSPTDNYKIRHSIALFQQQIDGEKLLNYLKTIRSKGITPKLFLYNLVQAATAAQRHIVLPEGEEIR…	phosphotransacetylase	phosphotransacetylase
NC_000911.1:1764835-1766925:-	NC_000911.1	HRIBO	CDS	1764835	1766925	-	sll1895	SGL_RS10225		2091	697	Yes	0.957196	5.06345	3.01032	0.177635	1.56684	0.872235	17.89	59.85	18.69	11.82	18.69	11.82	3.32	18.52	ATG	TAG	TCCTGTAACGCTCCT	ATGCTTTATCAATTGGTCGTTGATTCACCCTCGTTTAAAAAGGTCATTCGTTTACAAAATTCTTGTTATTCCATTGGCCGTCATCCGAGCAACACCATTGTTATTCCTTCTCCCCAAATTTCCCGTCGCCACGCCACCCTAATCAAAAAAATTAATCCTAATTTAGATATCTCCTTCCACATCATTGATGGAGATTTAGAAGGTCATCGCAGTCGTAATGGAGTGTGGGTTAACGGTGAATCCCATCTAGATTATGAGTTGGTGCATGGAGACGTCATCGCCCTATCGGAAGATATTCAAATTTTCTATCAGGCCATCCCCACCGACCCCAAAGATACTATCTCCGGCGGCGGCGATCGCCAGCGGTTAACCCCAGATCTATCAGAGCATTTTCCCCAG…	MLYQLVVDSPSFKKVIRLQNSCYSIGRHPSNTIVIPSPQISRRHATLIKKINPNLDISFHIIDGDLEGHRSRNGVWVNGESHLDYELVHGDVIALSEDIQIFYQAIPTDPKDTISGGGDRQRLTPDLSEHFPQEQWDITLIGHEDDLSQLSHEKLSKLAACIEYSPYPMVEIDYFGNLTYLNTATKEKFPSIQKDSMAHPLLKDIIPQREDTPIYYLRTREVQIGDKFYEQHIHYPAESQFIRSYIFDITERKVIEQSIHYQAFYDPLTDLPNRFLFKQELGKVLSNVQNQSSVLGLVLLGFRELQSLNDLLGHSVADEVLKIITERLSAHVRLEDLLCRWRGDTFILLIQSCRNLDEIEVFVRRLLAVLKRPFFIANNPLYLQGYAGIACYPNHGDNV…	hypothetical protein	hypothetical protein
NC_000911.1:487287-489377:+	NC_000911.1	HRIBO	CDS	487287	489377	+	slr1609			2091	697	Yes	0.431526	4.57493	2.50323	0.185806	2.0319	1.10885	12.1	61.67	28.04	13.48	28.04	13.48	5.21	27.39	GTG	TAA	CACAGACAAACACCG	GTGGACAGTGGCCATGGCGCTCAATCCAGGATAAAGCTTGGTCAGACTGGGTATAAACTGTCAACATATTTCTGCAAGAGTGGGCCCAATTGGGAAAATCAACCTCAAATCCATTGGAATAGCCTTTTTTCAACCGTAAAAATCCAACTTTCTCTCTTCCCTTCTTCCTTCCATCTGATTATGGTTACGCCAATTAACTACCATTCCATCCATTGCCTGGCGGATATCTGGGCTATCACCGGAGAAAATTTTGCCGATATTGTGGCCCTCAACGATCGCCATAGTCATCCCCCCGTAACTTTAACCTATGCCCAATTGCGGGAAGAAATTACAGCTTTTGCCGCTGGCCTACAGAGTTTAGGAGTTACCCCCCATCAACACCTGGCCATTTTCGCCGAC…	VDSGHGAQSRIKLGQTGYKLSTYFCKSGPNWENQPQIHWNSLFSTVKIQLSLFPSSFHLIMVTPINYHSIHCLADIWAITGENFADIVALNDRHSHPPVTLTYAQLREEITAFAAGLQSLGVTPHQHLAIFADNSPRWFIADQGSMLAGAVNAVRSAQAERQELLYILEDSNSRTLIAENRQTLSKLALDGETIDLKLIILLTDEEVAEDSAIPQYNFAQVMALGAGKIPTPVPRQEEDLATLIYTSGTTGQPKGVMLSHGNLLHQVRELDSVIIPRPGDQVLSILPCWHSLERSAEYFLLSRGCTMNYTSIRHFKGDVKDIKPHHIVGVPRLWESLYEGVQKTFREKSPGQQKLINFFFGISQKYILAKRIANNLSLNHLHASAIARLVARCQALVLS…	long-chain-fatty-acid CoA ligase	long-chain-fatty-acid CoA ligase
NC_000911.1:3342857-3344944:+	NC_000911.1	HRIBO	CDS	3342857	3344944	+	slr0662	SGL_RS17330	speA	2088	696	Yes	0.474412	4.04499	2.2597	0.192821	0.916617	0.554719	19.56	67.43	41.23	16.67	41.23	16.67	7.95	15.28	ATG	TAA	CCGCTGGAGCAAGCC	ATGGAAGGGCAGTCAATCGAACTAGAACTAAGTGTCATGGCAATGCCGGAGTTAATCGACAGTACTGAAGCAGGCCATACCGCCGGGGTGAAAACTGATTCCAATCCCCAGGCGATCGCCCAAGACCGTCGTTGGACCATTGACGACAGCGAAAACCTCTACCGCATCACTGGTTGGGGGGAACCTTACTTTTCCATTAATGCGGCCGGCCATGTGACCGTTTCTCCCCAGGCTGACCATGGGGGAGCGTTGGATTTGTACGAACTGGTTAAGGGTTTGAGGCAAAGAAATATTGGCTTGCCTTTACTGTTGCGCTTTTCTGATATTCTGGCTGACCGCATCAATCGCCTCAATGCGGCCTTTGCCCGGGGCATTGCCCGTTACCGCTATCCCAACACC…	MEGQSIELELSVMAMPELIDSTEAGHTAGVKTDSNPQAIAQDRRWTIDDSENLYRITGWGEPYFSINAAGHVTVSPQADHGGALDLYELVKGLRQRNIGLPLLLRFSDILADRINRLNAAFARGIARYRYPNTYRGVYPIKCNQHRHIVESLVRYGTPYNFGLEAGSKPELMIALAMLQPQENPEPDQQNQPLLICNGYKDREYIETALLARRLGHRPIIVVEQVAEVALAIEISSNLGIKPILGVRAKLSTQGMGRWGISTGDRAKFGLTIPEMLTAIEQLRRADMLDSLQLLHFHIGSQISSISVIKEAMTEASQIFVQLAKLGANMRYLDVGGGLGVDYDGSKTNFYASKNYNIQNYVNDVISAVQDACVAAEVPCPVLISESGRAIASHQSVLIF…	arginine decarboxylase	arginine decarboxylase
NC_000911.1:3313667-3315754:+	NC_000911.1	HRIBO	CDS	3313667	3315754	+	slr1463	SGL_RS17200	fus	2088	696	Yes	0.686024	6.61627	3.65115	0.114129	1.90345	1.00879	98.76	322.08	143.96	48.68	143.96	48.68	16.43	92.66	ATG	TAA	TACACGTAAATTCCT	ATGGAAAAAGATCTCACTCGTTACCGCAATATTGGTATTTTCGCCCACGTAGATGCGGGTAAAACCACCACCACCGAACGGATTTTGAAGTTAACCGGGAGAATCCATAAACTCGGCGAGGTACACGAAGGCGAATCCACCATGGACTTCATGGAGCAGGAAGCGGAGCGGGGTATCACCATCCAATCGGCGGCCACCAGTTGTTTTTGGAAAGATCATCAACTCAATGTTATCGACACCCCTGGCCACGTGGACTTCACTATTGAAGTTTACCGCTCCCTGAAAGTGTTGGATGGCGGCATTGGGGTATTTTGTGGCTCCGGCGGTGTGGAACCTCAGTCGGAAACCAACTGGCGCTATGCGAACGATTCTAAAGTCGCCCGTTTGATTTACATTAAT…	MEKDLTRYRNIGIFAHVDAGKTTTTERILKLTGRIHKLGEVHEGESTMDFMEQEAERGITIQSAATSCFWKDHQLNVIDTPGHVDFTIEVYRSLKVLDGGIGVFCGSGGVEPQSETNWRYANDSKVARLIYINKLDRTGADFYRVVKQVETVLGAKPLVMTLPIGTENDFVGVVDILTEKAYIWDDSGDPEKYEITDIPADMVDDVATYREMLIETAVEQDDDLMEKYLEGEEISIDDIKRCIRTGTRKLDFFPTYGGSSFKNKGVQLVLDAVVDYLPNPKEVPPQPEVDLEGEETGNYAIVDPEAPLRALAFKIMDDRFGALTFTRIYSGTLSKGDTILNTATGKTERIGRLVEMHADSREEIESAQAGDIVAIVGMKNVQTGHTLCDPKNPATLEPM…	elongation factor EF-G	elongation factor EF-G
NC_000911.1:2586572-2588650:-	NC_000911.1	HRIBO	CDS	2586572	2588650	-	sll0058	SGL_RS13940	dnaK1	2079	693	Yes	0.657831	4.99166	2.82474	0.177108	1.5549	0.866003	65.52	227.32	99.6	45.54	99.6	45.54	17.64	70.81	ATG	TAG	TCGGGGTCAGCAGTT	ATGGGCAAAGTCATTGGCATTGATTTGGGAACCACCAACAGTTGTGCTTCTGTGTTGGAGGGGGGCAAACCTATTGTGATTACCAACACGGAGGGAGGCCGTACCACCCCCAGCATTGTGGGTTTCACCAAAGGTTCCCAGCGGTTAGTGGGGCAATTGGCCAAGCGTCAATCGGTGACCAATGCGGAAAATACGGTGTACAGCATCAAACGCTTTATTGGGCGACGCTGGGATGACACGGTGGAGGAACGTTCCCGGGTGCCCTATAACTGCGTTAAGGGGCGGGACGATACCGTCAGTGTGTCTATTCGCGGACAATCCTATACTCCCCAAGAAATTTCCGCCATGATTTTGCAAAAACTGAAGGCGGACTCTGAGGCTTTTTTGGGGGAGCCGGTT…	MGKVIGIDLGTTNSCASVLEGGKPIVITNTEGGRTTPSIVGFTKGSQRLVGQLAKRQSVTNAENTVYSIKRFIGRRWDDTVEERSRVPYNCVKGRDDTVSVSIRGQSYTPQEISAMILQKLKADSEAFLGEPVTQAVITVPAYFTDAQRQATKDAGTIAGLEVLRIINEPTAAALAYGLDKQETEELILVFDLGGGTFDVSLLQLGNGVFEVLSTSGNNHLGGDDFDNCVVQWMAESFKQKENIDLSTDKMAIQRLREAAEKAKIELSSMLNTTINLPFITADESGPKHLEMELARSQFEELTKQLLEDTRVPLTQALDDGEIRASDVHRVILVGGSTRIPAIQRVIQEFFPDSQLERSVNPDEAVALGAAIQAGVIGGEVEDVLLLDVTPLSLGLETL…	DnaK protein 1, heat shock protein 70, molecula r chaperone	DnaK protein 1, heat shock protein 70, molecular c haperone
NC_000911.1:2671895-2673970:-	NC_000911.1	HRIBO	CDS	2671895	2673970	-	sll0602	SGL_RS14340		2076	692	Yes	1.16396	1.3466	1.25528	1.18671	1.14266	1.16468	189.83	211.16	163.09	156.81	163.09	156.81	193.54	179.18	GTG	TGA	TCGAGGGGTAATGCT	GTGCCGACTGTCCACTGCTCCAACTGCGATTGTCAAGCCCCCAATGACCTAGGCGATCGCCTGTGCAAAACCTGCCGGACTCCTCTGCTGAAAAGGTATCTGTGGTCGGTGGGGGACTGGATCAAGGCCTACCAACCGGGGGAACTGCTACTGGAACGTTATCTGTTGGTGCGGCCCCAGGTGTTGTTGGACACTACGCCGGCCCTGGGGGTCGAGGGGCCAGAGGAAATCCCGAATTATATTTTGCCCTACCAAAAGCTATTGCCCTTTCGTCTCAATGTGCCGGAGGTGTACGACTATTTTCCTAGTTGGGATGAGGAAAAGGATTTATCGGTGTGGCTGTTGGACTATGGCCCGGTGGCGCTGGATCAAGCAGGGGAACCTGTCCATGAACAGTTG…	VPTVHCSNCDCQAPNDLGDRLCKTCRTPLLKRYLWSVGDWIKAYQPGELLLERYLLVRPQVLLDTTPALGVEGPEEIPNYILPYQKLLPFRLNVPEVYDYFPSWDEEKDLSVWLLDYGPVALDQAGEPVHEQLLPSLGEMWEHACPLQQLTWLWQMIRLWQPLQRQGVVSSLLEFDWLRVQGPQVLLQQLKLDEHQFYEMKYLAGVWEPLLTNAHPAIADFCQTLWKKLKQGKIPHADHLLRVLDTGIQSLAEQYDFSYTVFALTDGGPSRDHNEDACFPVSETPIEGQQLANTMTLICDGVGGQEGGEIASQWVIEHLPVRVISKIQKQMNEPEQIRTFIQHLKEDIQEVNEQLNRRNDREERTERERMGTTLVMALADFQQFFLANVGDSRCYWLTA…	hypothetical protein	hypothetical protein
NC_000911.1:1916533-1918608:-	NC_000911.1	HRIBO	CDS	1916533	1918608	-	sll1098	SGL_RS10930	fus	2076	692	Yes	0.080101	1.05995	0.570023	0.028744	0.650947	0.339845	78.39	332.42	978.64	313.62	978.64	313.62	28.13	204.15	ATG	TAA	TTAGGAGTAAACTTT	ATGGCTCGCACAGTGCCCCTAGAACGAATACGTAACATTGGTATCGCCGCCCACATTGATGCGGGTAAGACCACCACGACGGAACGGATTCTGTTCTACTCTGGCGTGGTTCATAAAATCGGTGAGGTTCATGAAGGTACGGCAGTAACGGACTGGATGGCCCAGGAAAGGGAAAGGGGCATCACCATCACCGCCGCCGCTATTAGTACCGATTGGTTGGGGCATCATATCAACATCATTGACACTCCGGGGCACGTGGATTTCACCATTGAGGTGGAGCGCTCCATGCGAGTGTTGGACGGAGTAATTGCTGTATTTTGTTCCGTGGGTGGAGTGCAACCCCAATCAGAAACAGTGTGGCGTCAAGCGGAACGATACCAAGTGCCCCGCATTGCCTTC…	MARTVPLERIRNIGIAAHIDAGKTTTTERILFYSGVVHKIGEVHEGTAVTDWMAQERERGITITAAAISTDWLGHHINIIDTPGHVDFTIEVERSMRVLDGVIAVFCSVGGVQPQSETVWRQAERYQVPRIAFVNKMDRTGANFFRVCQQIGDRLRANAVPVQIPIGSEAEFEGIVDLVRMKAYLYKNDLGTDIQEVPIPDSVKDKTEEYRLRLVESVAEADDALMEKYLEGEELTADELVAGLRRGTIAGTMVPVLCGSAFKNKGVQLLLDAVVDYLPSPLEVPAIEGHLPDGEVATRPAEDKAPLSALAFKVMADPFGRLTFVRVYSGVLEKGSYVLNSTKEKKERISRLIILKADDRIEVDQLNAGDLGAVLGLKDTLTGDTLCDDQEPIILESLF…	elongation factor EF-G	elongation factor EF-G
NC_000911.1:1494758-1496830:+	NC_000911.1	HRIBO	CDS	1494758	1496830	+	slr1729	SGL_RS08870	kdpB	2073	691	Yes	0.389879	4.20722	2.29855	0.175388	1.95925	1.06732	6.78	36.14	17.39	8.59	17.39	8.59	3.05	16.83	ATG	TGA	TTTTTACCTAAGATT	ATGAACTCCACTTCCACTGTGCGACAACCGGGGGGGCCACGGCAGCAGCGGCGACACACCCCAAAAGCCAATCTTTCCGATCTCTATCAAAGGGCTTTCAAGGAAGCCTGGGTGAAGCTCAATCCCAAAATCATGGTCAAAAATCCGGTCATGTTTATGGTTTGGGTCGGCACCTTGATCACTGGGATGTTGACTCTCAATCCCAACCTATTTGGGGTTACTGGCACCTCAGCCATGTTTAACGGGTTAGTGACGGTTATTTTGTTATTTACGGTTTTATTTGCCAACTTTGCCGAAGCCGTGGCCGAGGGTAGGGGAAAGGCCCAGGCCGATGCCCTGCGTTCAACCCAGACTCAGACCTATGCCCAGCGAATTTTAGCCGATGGTTCCCTAGAAATG…	MNSTSTVRQPGGPRQQRRHTPKANLSDLYQRAFKEAWVKLNPKIMVKNPVMFMVWVGTLITGMLTLNPNLFGVTGTSAMFNGLVTVILLFTVLFANFAEAVAEGRGKAQADALRSTQTQTYAQRILADGSLEMVSSTHLRKGDRIVVSVGDIIPADGEVLEGVASVDESAITGESAPVLKEPGSDVASSVTGGTRIISDELIIRVTADPGKGFIDRMIDLVEGAERSKTPNEIALTVLLAVLTLVFLIVVATLPPPANYIDSPVSITLLIALLVALIPTTIGGLLSAIGIAGMDRVAQFNVVATSGRAVEACGDINTLVLDKTGTITLGNRLAETFLPVNGHSLKEVAAIALAASIFDTTPEGKSIVRLAEKMGATLDFDRQQAEGVEFSARTRMSGTD…	potassium-transporting P-type ATPase B chain	potassium-transporting P-type ATPase B chain
NC_005229.1:39663-40259:-	NC_005229.1	HRIBO	CDS	39663	40259	-	MYO_RS16745	SGL_RS00185		597	199		0.131932	0.348261	0.240097	0.52638	0.705638	0.616009	1310.25	2253.79	9931.25	6471.55	9931.25	6471.55	5227.61	4566.57	ATC	TCC	GGGGAGTAAAATCCA	ATCAAAAGGAGGACACCCCTTTATGGTACAAAAAAACAAGAAGCAAATTGTGTGGATACCTTACTAGACGAGTTGCTGGAAGAGTATCAAACCCCGGAAGAAATACTGGGAGAATCAGGACTACTAAAACAACTAACCAAACGCTTGATAGAGCGTGCATTGGCTGGGGAACTGAGTCATCACTTAAAAAATCAGGCAGAGGAAGAGAAGCGCAATAGTCGCAACGGGTACTCAAAGAAAACAGTACAGTCGGAGCAAGGAGAAATGGAATTGGCCATCCCCCGAGACCGGCAGGGAAAATTTGAGCCAGTGCTAGTGCCCAAAAATGAGCGTCGCATCGCGGGATTAGATGAGAAAATCCTTGCTTTGTATGCGCGTGGGATGAGTACTCGAGATATC…	IKRRTPLYGTKKQEANCVDTLLDELLEEYQTPEEILGESGLLKQLTKRLIERALAGELSHHLKNQAEEEKRNSRNGYSKKTVQSEQGEMELAIPRDRQGKFEPVLVPKNERRIAGLDEKILALYARGMSTRDISPQLEELYGAKVSASMISEVTDAVLEEVKAWQARPLEEIYPIVYLDALYVNIKVSGRISKRAVYIS	IS256 family transposase	incomplete_partial in the middle of a contig_missing stop_Derived by automated computational analysis using gene prediction method: Protein Homology.
NC_000911.1:365716-367785:+	NC_000911.1	HRIBO	CDS	365716	367785	+	slr1063	SGL_RS03620		2070	690	Yes	0.513731	1.90851	1.21112	0.183815	2.07045	1.12713	14.03	57.16	27.31	29.95	27.31	29.95	5.02	62.01	ATG	TAA	ATTTGCTAAAATTCT	ATGTCCAAAAATGACAAGCCATTAGTCAGCATTGGTATACCAACTTATAATCGAGCAGAAAGCTTAAAACGAGCAATAAATTCTGCTGTTAATCAGACATACACAAACCTCGAAATTATTATTTCTGATAACTGTTCAATTGACGAAACCCAACAATTGTGTGAGGAACTTTGTAAACTTGACTCCCGTATAACTTACATACGTCAAGCTAAAAACTTTGGTGCTACTAACAATTTTAGTTTTGTTTTAAAAAAAGCGACTGGAGAATACTTCATGTGGCTGGCAGATGATGATTGGATTAGTGAAAACTATATTTATGACTGTCAATTTTTTCTTCAAAATAATCATCAGTATTTACTTTGTAGTGGAATTGCCAAGTATTATTTGGGTGATGATATC…	MSKNDKPLVSIGIPTYNRAESLKRAINSAVNQTYTNLEIIISDNCSIDETQQLCEELCKLDSRITYIRQAKNFGATNNFSFVLKKATGEYFMWLADDDWISENYIYDCQFFLQNNHQYLLCSGIAKYYLGDDIRMGENICLEENSPIERVKEYFNKVQDNGIFYGLYRKEAVLKLRIPSCFGGDWVFIACILLLGKATTLNTCVIHRVFQEKSTEDYAKEINSKYVLEKSYPYAFICFHFFSEIERTLILQNILTKQQKILLFLDILLTLMRRFGHLYSIEYGWLNIFCIRKKLISLLKIIIRNFRQSCLYFIDSLRTFIYNLKYTPQMYQLYASSKQKNSDLKKLAFFSPVKPIKSGISDYSEELIRFLCKKYQIFVFIDDSYTEKQCPNIENTFYLN…	probable glycosyltransferase	plobable glycosyltransferase
NC_000911.1:216264-218327:-	NC_000911.1	HRIBO	CDS	216264	218327	-	sll1031		ccmM	2064	688	Yes	0.401696	3.52736	1.96453	0.212354	3.83963	2.02599	99.5	382.93	247.7	108.56	247.7	108.56	52.6	416.83	GTG	TAG	TTTGAACCCGATGCA	GTGCTGGCAAAGTCCCTGGGCTGGTTGTTGGCTGTATCTAGGAGGAACTATTGCATGGGATCTCGCACCGCCTTGGCTTCCAGGCCTTGGTCCAAACATTTAGCAGACCCCCAGATTGACCCGACGGCCTACGTGCATTCGTTTGCCAATGTGGTGGGGGATGTGCGCATTCAGCCCGGGGTCAGTGTTGCCCCTGGGAGCTCCATTCGAGCGGACGAGGGCACGCCCTTTTGGATTGGCGGTAATGTGCTGATCCAACATGGAGTGGTGATCCATGGCTTAGAAACTGGTCGGGTGCTGGGGGATGATGACCAGGAATATTCTGTTTGGATTGGGCCGGGCACCTGTGTGGCCCATTTGGCTTTGGTCCACGGCCCAGTTTACCTCGGCGCTAATTGC…	VLAKSLGWLLAVSRRNYCMGSRTALASRPWSKHLADPQIDPTAYVHSFANVVGDVRIQPGVSVAPGSSIRADEGTPFWIGGNVLIQHGVVIHGLETGRVLGDDDQEYSVWIGPGTCVAHLALVHGPVYLGANCFIGFRSTVLNARVGDGAVVMMHSLVQDVEIPPNKLVPSGAMITQQHQADSLPDVQAGDRHFVQQIAAMHGQSASPTQGTDPTVCVLPESLPAVTPVTETPYINSIDNMSINSDITNQIRSLLAQGYGIGAEHANERRFKTKSWQSCGTADGFRPDQVIATVEGWLQEFAGEYVRLIGIDQGAKRRVVEVIIQRPGDVPGSPSRGTTTTKALSSGGSGRSAVAHQTGNLAGDSANQLRALLHQGYKIGLEYASARRFKTGSWLTGGT…	carbon dioxide concentrating mechanism protein CcmM, putative carboxysome structural protein	carbon dioxide concentrating mechanism protein Ccm M, putative carboxysome structural protein
NC_000911.1:2935471-2937525:-	NC_000911.1	HRIBO	CDS	2935471	2937525	-	sll0471	SGL_RS15545		2055	685	Yes	0.260986	2.6989	1.47994	0.249732	1.97198	1.11086	9.74	49.12	37.32	18.2	37.32	18.2	9.32	35.89	ATG	TAG	GTAGCGATAACTTTG	ATGATTACCTACTGCCGCCGAACTGTTGCGGCTATTTTTCTGGCAATTTTTTCCTGGCCGATCGCCCCTGGGCAAACTGCTCCTCCCAGGCCAGTGGACAAGACAGTGGAGTGCGAAATTTTGATAGTGGGGGGTGGATTAGCCGGCACAGCAACGGCCTATGAAGGTCTGTTGGCGGGGAAAAATGTTTGCATGACGGAGCTGACGGATTGGGTGGGGGGTCAACTTACTTCCCAGGGCACCGCCGCCCTCGATGAACGGCCAACCCAAACGGATAAGTTGTTTTATCCCCGGGGTTATCTGGAGCTACGGCAACGGATTAAGGATTTCTACGGTGTGCAAAATCCCGGCAAATGCTGGGTAAGCCGCTCTTCTTGTTTCCTACCCAAGGATGGCCAT…	MITYCRRTVAAIFLAIFSWPIAPGQTAPPRPVDKTVECEILIVGGGLAGTATAYEGLLAGKNVCMTELTDWVGGQLTSQGTAALDERPTQTDKLFYPRGYLELRQRIKDFYGVQNPGKCWVSRSSCFLPKDGHDILMAMLEDAEKKGQGTLQWFPNTVIKELVLAPTALGEAGEEIIQAIAIQHQPAPNAPPLNSQFLSQTIEDSYRYEDSEQFTKTIINFTAPQSNQGRTAQWLVVEATETGELIGLADVPYRVGVDPRTYLDPSSSSVEGFAYCTQGFTYTFAMEATTEPQPQPEPDFYQRFTPYYSYDQSRFDFDALFTYRRIWSPDGLGIFEPATPNQPKNRFGVSPTQPGEISMQNWLPGNDYTPGTPRDNFVYTREQLQQTGQLEPGGWLGGL…	hypothetical protein	hypothetical protein
NC_000911.1:2495493-2497538:-	NC_000911.1	HRIBO	CDS	2495493	2497538	-	sll0005	SGL_RS13495		2046	682	Yes	0.413301	3.53164	1.97247	0.348794	1.85046	1.09963	28.96	87.62	70.07	24.81	70.07	24.81	24.44	45.91	ATG	TAG	ATTAAAACCATTAAT	ATGTCTCCAGCCCCCATGCCCGTTACCACCGCCGAACAAGATCGCGATGTAGTGGTGATCGACGCAGTGGTGGAGGAAGTTCGCCCCCCCCGTTTGCCCAAAAGTCATCTGGAGGATTTAGGACCTGTTAGTGATATGTTCCCGGAAAGTTGGGAATATCACCCAGATTTGATCATGGAGTTTTATCGCAAGCGGCCGTTACAAGTATTAGGTCGTTTAATCAATATTTTGTTTCCCCTATTGCGATTTATTCTGGGTATTTGGTGGGAAAAATTGAGGGGTAAAGACCCCACCGTTTCCAGGGCGAAAGCTATTCAATTAAGAGAACTATTAACCAATCTTGGCCCTACTTATATCAAAGTTGGCCAAGCTCTTTCCACCAGGCCCGATTTAGTGCCG…	MSPAPMPVTTAEQDRDVVVIDAVVEEVRPPRLPKSHLEDLGPVSDMFPESWEYHPDLIMEFYRKRPLQVLGRLINILFPLLRFILGIWWEKLRGKDPTVSRAKAIQLRELLTNLGPTYIKVGQALSTRPDLVPPVFLDELTTLQDQLPSFPNEVAYRFIEEELGAPAEEIYAELSPEPIAAASLGQVYKGKLKTGEAVAVKVQRPDLVRRITLDIYIMRSLSLWARRSVKRLRSDLVAITDELASRVFEEMNYYQEAINGEKFAQLYGSLPEIYVPSIYWQYTGRRVLTMEWVEGIKLTNIKAIQAQGIDATHLVEVGVQCSLRQLLEHGFFHADPHPGNLLAMADGRLAYLDFGMMSTIQPYQRYGLIEAVVHLVNRDFDSLAKDYVKLDFLKPDTDL…	hypothetical protein	hypothetical protein
NC_000911.1:2857874-2859919:+	NC_000911.1	HRIBO	CDS	2857874	2859919	+	slr0844	SGL_RS15190	ndhF1	2046	682	Yes	0.189985	1.89607	1.04303	0.0542931	0.732678	0.393485	23.41	84.83	123.22	44.74	123.22	44.74	6.69	32.78	ATG	TAG	AACCAAGGTTTCAAG	ATGGAATTACTCTATCAATTAGCCTGGCTAATTCCCGTCCTGCCCCTATTTGGCGCAACGGTAGTTGGCATTGGCCTCATTTCTTTCAATCAAGCAACCAATAAACTACGGCAAATCAACGCTGTTTTCATCATTTCCTGTTTGGGGGCTGCATTGGTAATGTCTGGGGCTTTGCTCTGGGATCAAATCCAAGGCCATGCCAGCTATGCCCAAATGATCGAATGGGCATCGGCGGGGAGTTTCCATTTGGAAATGGGTTATGTGATCGATCACCTCAGTGCTTTGATGCTGGTGATTGTAACCTCCGTGGCCCTGTTGGTGATGATCTACACCGATGGCTACATGGCCCACGATCCGGGTTATGTGCGTTTCTATGCCTATCTCAGTCTTTTTGCTTCC…	MELLYQLAWLIPVLPLFGATVVGIGLISFNQATNKLRQINAVFIISCLGAALVMSGALLWDQIQGHASYAQMIEWASAGSFHLEMGYVIDHLSALMLVIVTSVALLVMIYTDGYMAHDPGYVRFYAYLSLFASSMLGLVISPNLVQVYIFWELVGMCSYLLIGFWYDRKAAADACQKAFVTNRVGDFGLLLGILGLYWATGSFDFGTIGERLEGLVSSGVLSGAIAAILAILVFLGPVAKSAQFPLHVWLPDAMEGPTPISALIHAATMVAAGVFLVARMYPVFEPIPVVMNTIAFTGCFTAFLGATIALTQNDIKKGLAYSTISQLGYMVMAMGIGAYSAGLFHLMTHAYFKAMLFLCSGSVIHGMEGVVGHDPILAQDMRIMGGLRKYMPITATCFL…	NADH dehydrogenase subunit 5	NADH dehydrogenase subunit 5
NC_000911.1:664903-666945:-	NC_000911.1	HRIBO	CDS	664903	666945	-	sll0985	SGL_RS04955		2043	681	Yes	0.492946	3.10438	1.79866	0.313693	4.1532	2.23345	5.94	18.44	12.05	5.94	12.05	5.94	3.78	24.67	GTG	TAG	TTATTCGTTGTCAGA	GTGCTCCCAACAAATAGAAAAAATTATATTTTTCGCCATCAAAGATTAAATTTAAGTCAATTAATCGCCCTTACTCTGCTCACCTTACTGCTAAGCCTAGGTTTTGCCCAAGCCCAGTCGGCACAAACTCTCCTTAGTCAACTACCGCCCCAAATTGACCTAGTGGATCCCGTCAAGTCTGATTTCCCCCTGCAAAATAAAGCTTTTAATCTAGGCTTTGAATCAGATTTATCCGGTAGAATTGGTAACTTGGATTACACCACCGTTAGGGTAGATGGAGAGCCAATTTTTTTGATTGCTGTGCCCACAGGAAATGCTAGTAAAGAAGGAGATTCTTCCCTTAGTCCAATTGTTTATCGTCAACAACGTATTGAAAGTAAGTTTAAAGAAATTGTCCAG…	VLPTNRKNYIFRHQRLNLSQLIALTLLTLLLSLGFAQAQSAQTLLSQLPPQIDLVDPVKSDFPLQNKAFNLGFESDLSGRIGNLDYTTVRVDGEPIFLIAVPTGNASKEGDSSLSPIVYRQQRIESKFKEIVQRGFDPETLNVASSILNGAIIIQISDDKNLRPQILRTITKADADLYALTPEDLASETVDQVRNALMRARRERQPEALRRQIKVALVIVTIVVTVSLVVLFIYRWLGHRIHLLKMAINCLVKAEEEDPNFDYNYIDASIFKNIAAIPRYSFAFQILDRIAIFLYYLSAYSKTILFGNVGWGDSKKNPPLTFSLDNQKIFENILELFQGKDFYDFLKNRLKQVVFTRRILIFFLFIIWIRGSAFFLQVFPNTRRLGRQLSGTPISLTLI…	unknown protein	unknown protein
NC_000911.1:1069666-1071702:-	NC_000911.1	HRIBO	CDS	1069666	1071702	-	sll1359	SGL_RS06885		2037	679	Yes	0.255389	2.38623	1.32081	0.0670659	0.472579	0.269822	8.53	20.45	33.4	8.57	33.4	8.57	2.24	4.05	ATG	TGA	AGGGGGAATAATGGC	ATGAAAATAGGAAGAATTACGGCCTATGCCCTAGTTGTGATTATTTTTGTGCTGTTTTTTTCCCTGGTAACTCCAGTAAGCTCTAAAACCGTTGCTACTATTACTTTGCCTGGGGTTTGTAATGCCAAATTATCTCCCCTTGCCATCAGTTGGCAGTTACCGGCAGACGTGGAAGGGGAACTCAAGCAAAAGAATTTCAATGTTGTCCAACGGGCGGTGGATACCTTTGCTTGGCAAGAATTCATTGCCCTAAACTGGCCCGCTATAGTTGGCGACGGCGATCGGGGAGTGCCGGATAAAAATTTAGCCATCAATGCTCCCGGCCCAAGGGTGTGGGAAACCTGGAAAGAAACCAGCGAAGTTTATTTGCCCAATGGCGCAGTGCCGCAGCCATGGAAT…	MKIGRITAYALVVIIFVLFFSLVTPVSSKTVATITLPGVCNAKLSPLAISWQLPADVEGELKQKNFNVVQRAVDTFAWQEFIALNWPAIVGDGDRGVPDKNLAINAPGPRVWETWKETSEVYLPNGAVPQPWNSNEPLPNGLKGDGRTKILFRQSKVDEVLNDEFQPTKADGALPGTLTDQWGNVVRYEIRMNKVLFDYVVKNKLYNPEQQALLPEINAPDGSILIKAAWREITPEESGRFHNVPAYVQDLTTGKYQLQQMGLVGFHIMYKTPSAPQWIWSTYEQVDNVPGLNHSGSANTVFSFHGDRCVNCLTNKQTILGVPNQVTRRTPIPHQDPDCSQPTKAVDNVAELNRLVQAGLKDSVWANYELINAQWAIPKSAADKSPDTVFHVLPALLAN…	unknown protein	unknown protein
NC_000911.1:232008-234038:+	NC_000911.1	HRIBO	CDS	232008	234038	+	slr1777	SGL_RS02940	chlD	2031	677	Yes	0.428853	4.5901	2.50947	0.133757	1.85282	0.993288	19.59	66.74	45.68	14.54	45.68	14.54	6.11	26.94	ATG	TAG	TACTGTTAACTCTCC	ATGACCACCCTGACCCCCTTTATTCCCCTCAATTTCCCCATCACGGCGATCGTCGGCCAAGAGGCAATCAAGCTGGCTTTACTCCTAGGGGCGATCGATCCTGGCTTGGGGGGCATTGTTATTGCCGGACGGCGGGGCACAGCCAAATCGGTCATGGCTAGGGCAATTCACACTTTGCTCCCTCCCATTGAAATCATTAAGGGCAACCGTTACCAATGCGATCCAAAAAATCCCGGCAGTTGGGATGATGACACCCTAGAAAAATTTGCCGATGTTCCCCTGGATCAATTGGAAACCCAGGTAATTCCCGCTCCCTTTATTCAAATTCCCCTGGGGGTCACGGAGGATCGCCTGTTGGGATCGGTGGATGTGGAAAAATCCGTTAAGCAAGGGGAAGCG…	MTTLTPFIPLNFPITAIVGQEAIKLALLLGAIDPGLGGIVIAGRRGTAKSVMARAIHTLLPPIEIIKGNRYQCDPKNPGSWDDDTLEKFADVPLDQLETQVIPAPFIQIPLGVTEDRLLGSVDVEKSVKQGEAVFQPGLLAQAHRGVLYIDELNLLDDQIANQLLTVLTEGKNQIEREGMSFQHPCQPLLIATYNPEEGPLRRHLLDRIAIALSADGILGLDQRVAAVDQVLAYADSPISFIDQYDAELDDLKTTIILAREWLKEVSLTPEQVSYLVEEAIRGGLQGHRGELFAMRVAKAIAALDGRSDVQADDLRQAVELVIVPRSVLMDNPPPPEQAPPPPPPPQNQDEGKDEQEDQQDDKEDDKDNEPEAEQDPPSIPEEFIFDPEGVSLDPSVLY…	magnesium protoporphyrin IX chelatase subunit D	magnesium protoporphyrin IX chelatase subunit D
NC_000911.1:2618067-2620094:+	NC_000911.1	HRIBO	CDS	2618067	2620094	+	slr0484	SGL_RS14080	hik26	2028	676	Yes	0.717249	1.65513	1.18619	1.04514	1.40325	1.2242	47.03	79.38	65.57	47.96	65.57	47.96	68.53	67.3	ATG	TGA	CTTTTTTCAGGAGCG	ATGAGCAACTCCCCGTCTGTTCTTACAGAGCTATTGCAGGCTTTACCCAATCTGCGGGCCCAAACCTACTTCAAGTCTTCCCTCACGGCCTTGTCCCACGCCATGGAAGACCAGGTACTAGCGGAAAGTACAGCGGGCAATCCCCTGATCATTGCGGCTTTTCAGCGGGAGAGATTTTATCGTCAAGAAGCCCACCGTTATCGACGTATTGCCGATAAGAGCAGTCAGGTTTACGTGCTCTCCGCTCCGGAGACGGAATTTAAACACAACTCCGGCATTTACGAAACCATTGCCTTTACTCCTGAAGACAGCCTCGCCCAGGAATGGCATTTGATTGTCATTGGCGATCGTTATGCCAGTTGTCTAATTTGTCGAGAACGACCGACCCAGGATAAATGG…	MSNSPSVLTELLQALPNLRAQTYFKSSLTALSHAMEDQVLAESTAGNPLIIAAFQRERFYRQEAHRYRRIADKSSQVYVLSAPETEFKHNSGIYETIAFTPEDSLAQEWHLIVIGDRYASCLICRERPTQDKWDSNRRFEGVWTFDRQVSRVAAQLLLQRILAYRPELQAKIEEATQTWLQPSCTVPPRGIDDNPDPFVQRLITYLQAGQYKLIKANRNLQDKEERERLLNSITGAVRRSLDPEEIMQVAVEKLGQGLGICRCVIYRCSADDTVATINHEFLGSGVGSIKGYPWPLKDNPLFQEVVVLKEAIAIDNIDRDPRLGEPEPSTGEVKTLVKSCAILSWMLVPIFYRERLLGMMEFHHCGPAPTEWEDDALTLVEGVATQIGVALIQAESYAN…	two-component sensor histidine kinase	two-component sensor histidine kinase
NC_000911.1:1808922-1810946:-	NC_000911.1	HRIBO	CDS	1808922	1810946	-	sll1871	SGL_RS10405	hik6	2025	675	Yes	0.53716	2.33057	1.43387	0.535347	1.96373	1.24954	8.89	22.49	16.55	9.65	16.55	9.65	8.86	18.95	ATG	TAA	GAGTAATTTTTAGCC	ATGGTCTCAATTATTAAGTCGGTGCGAAGAAGTTTACTGCTTAAATTTGTACTTTCCTATTTTTGTCTTTCCAGCGTGGTAGTGGCGTCAATTTTCTTAGTTGCTAACTACAGGGCAGTTAAGGGCATAGAAAGCCAAACCTTTAATCGTCTAAATATTTCTAATAACCTCAAAGAATATCAATTAGAGCAATGGATGGAGGGACAAAAAGATACATTATTTTTACTCAGTGATATTAACAGTATTCAGGCAAATACTGAATTGCTAAAAAACACTAGCGTTAGTGACCCTCAATATAAAATAATTCAGAAGAGATTAATTGAAGAGTTGCGAGAGATTGATCTGTTTCTGCCTCATATTGAAGCCATTAATATTCTCAACACCGGTGGTATTGTGGTG…	MVSIIKSVRRSLLLKFVLSYFCLSSVVVASIFLVANYRAVKGIESQTFNRLNISNNLKEYQLEQWMEGQKDTLFLLSDINSIQANTELLKNTSVSDPQYKIIQKRLIEELREIDLFLPHIEAINILNTGGIVVASNNLDEIGVYKGIGNQTTYFANINSNFKTVPNFYFSKVYNRPSMTFATNIKHDITRERLGYLSIDINLNAVDDLIRKRTGLGDTGETFLVGEINNQVSFIASDENKKLTANGSKPNFNSLGINSVMAGNSGQGSYVNYAGTPVLGVYQWIEKYNLALITEISEVEALELARRFTRMLVLVGLVSTALLLIAVYLLSIKITKPILLITKAAIDISSGDREARAPVLGEDELGILAKSFNLMTNELRESNSSLEKKNQELELAQKQL…	two-component system sensory histidine kinase	two-component system sensory histidine kinase
NC_000911.1:93128-95152:+	NC_000911.1	HRIBO	CDS	93128	95152	+	slr1129	SGL_RS02280	rne	2025	675	Yes	0.841643	5.5376	3.18962	0.288634	3.52501	1.90682	44.06	153.89	52.35	27.79	52.35	27.79	15.11	97.96	ATG	TAG	TTGAGGAATATATTT	ATGCCAAAACAAATTGTCATTGCTGAAAAACATCAGGTTGCTGCTGTTTTTTGGAAGGATCAAATTCAAGAATTGGTGGTGTCCACGGGCAGCCAACAGGTGGGAGATATTTATTTAGGCTTAGTTGACAATATTCTGCCCAGCATTGACGCCGCTTTTATTAACATTGGGGACACCGAAAAAAATGGCTTTATCCACGTCAGTGACCTCGGCCCAGTTAGATTAAGGCGCACCGCCGGTTCCATTTCTGAACTTTTATCTCCTCAACAAAGAGTGTTGGTGCAGGTGATGAAGGAACCCACCGGCAATAAGGGCCCCCGCCTAACTGGAAATATCAGTATGCCGGGGCGTTATATGGTGTTGATGCCCTATGGCCGGGGAGTGAATCTTTCCCGTCGG…	MPKQIVIAEKHQVAAVFWKDQIQELVVSTGSQQVGDIYLGLVDNILPSIDAAFINIGDTEKNGFIHVSDLGPVRLRRTAGSISELLSPQQRVLVQVMKEPTGNKGPRLTGNISMPGRYMVLMPYGRGVNLSRRINREEERSRLRALAVLIKPPGMGLLVRTEAEDVPEDAIIEDLENLQKQWELVQQQAMTRSAPMLLDRDDDFIKRVLRDMYSSEVNRIVVDTPAGMKRIKQQLMNWDQGRLPEGVLIDCHRESLSILEYFRVNATIREALKPRVDLPSGGYIIIEPTEALTVIDVNSGSFTHSANSRETVLWTNYEAATEIARQLKLRNIGGVIIIDFIDMDSHKDQLQLLEHFNRCLETDKARPQIAQLTELGLVELTRKRQGQNLYELFGQPCPE…	ribonuclease E	ribonuclease E
NC_000911.1:393996-396017:-	NC_000911.1	HRIBO	CDS	393996	396017	-	sll1021	SGL_RS03780		2022	674	Yes	0.851618	7.91375	4.38268	0.252324	1.54016	0.896243	45.8	146.8	53.78	18.55	53.78	18.55	13.57	28.57	ATG	TAG	CTCCGGAGGCACACC	ATGCAAAGTAAATTTTGGTTTGAATTTCTCCAGACCTTGCCCACCCTGCCAGGGGACACTGTTCCCGTAATGGCCATACAGGCTAGTCCAGGTGAAACTTCAGGAGAGTTAATCATTGCCCAAGCCCCCAATCAGACTTTGGATAATAATAATTCTGCCTTGGGAGGTTTGTCGCCACTGTTATTTTTTCCGGTGGTAATTATTGCGGTCATTTTTCTGATTTTAGTGACCATTTTTCTTTATACCCGCTTTTACGTCATTGCCCCCAATAACGAAGCTTTAGTCAGAACTGGCGGCGTTTTTAAAAAAGAGCAAATGGTGATTCTCCACGGAGGCTGCATTGTCATTCCCGGTTTCCATGAAATTACCAGGGTCTCCCTAAGGGAAATTTCTATCGAT…	MQSKFWFEFLQTLPTLPGDTVPVMAIQASPGETSGELIIAQAPNQTLDNNNSALGGLSPLLFFPVVIIAVIFLILVTIFLYTRFYVIAPNNEALVRTGGVFKKEQMVILHGGCIVIPGFHEITRVSLREISIDVVRAGNLAVRTQDYMRANMRVTFYVCITPNRNEILTAAARLSKKGQISEADIKDALEKRADDAIRAAAKKKKLAELDSDKLGFADEVLNLIQGDLRKVGLTLNNIAISEIEESDTYDENNFFDAQGVRLRTETIQRSIQQKREVELTTRVAIEQGELEAEKKSLAIKREQEDANITQQKEIELLKLAQRKELESQEAQQQREIQEAKDKEEAKKERNKILQEQAVEEERIQKELAIQNSQIASAIALEERNKELKVAQALQKQEAE…	hypothetical protein	hypothetical protein
NC_000911.1:512615-514633:+	NC_000911.1	HRIBO	CDS	512615	514633	+	slr1056	SGL_RS04280		2019	673	Yes	0.912924	2.25983	1.58638	0.341731	1.16924	0.755486	16.67	32.18	18.26	14.24	18.26	14.24	6.24	16.65	ATG	TAA	TAAGCAGTAATTCAT	ATGGAATTAAAAAGTGTTAAATTAAACAAATTTAAAAGATTTGAAAGTGCTGAGCTTAAAACTAATGGTAAGCTTATTGCTCTAATTGGAGCCAATGAAAGTGGAAAGACATCTATTCTAGAAGCAATACAATGTTTGGATGATGATAAAGCTTTCTCCGACGTGTTTTTTACTCGTGACCTTTCCGAACCTGAGCAAGATGAAGTCATTATCGAAGCTACATATATGTTAAGTGAAGAGGACAATGAATCAATCCTCTTTTATGATCCATTACGCGTGGCAAAGAAATTTTTGATTCTGAAAAGAGCTAATGGAAAACGGAATTTTAAAATTGAGCCTGATATTATATTTAATGACCAATATCGAAAAGAAATAATTAATAAAACATTACAGTTTATT…	MELKSVKLNKFKRFESAELKTNGKLIALIGANESGKTSILEAIQCLDDDKAFSDVFFTRDLSEPEQDEVIIEATYMLSEEDNESILFYDPLRVAKKFLILKRANGKRNFKIEPDIIFNDQYRKEIINKTLQFIENIFYEDQDFDNELLNNIVTEGREIILQLQTSLNDKRNKDRHNGEKWQVPHEVPNVLVMEDQKKLELWIELIEEFLDFNQGTNNEKHLKELSDSAKKLLKYENSSLINGSIEIIYKRRPKALLFDDESRKIPSFFSIITQNTNKEKIVAKPDKALANLLKLAKLDLNELFKSLGNLQKSQMLLNRANQTIVDFFNSKWSQSNSQYLKLYLHGNTLRISIETNKGSSFNIDERSQGFRQFVALTCFLEVEHLDVLPILLIDEAELHL…	unknown protein	unknown protein
NC_000911.1:2589851-2591869:+	NC_000911.1	HRIBO	CDS	2589851	2591869	+	slr0063	SGL_RS13950	pilB1	2019	673	Yes	0.329924	3.48008	1.905	0.248732	1.43073	0.839733	79.36	450.67	240.54	129.5	240.54	129.5	59.83	185.28	ATG	TAA	TGGGTAGGTCTTGCT	ATGACATCTTCCTCCTCTTCCAAGAAAAGCCGTGCCGTTGCCCTACGAAATTATTTTTCCCCCTTCGGCAATAAATTGGTGGCGGGGGGCCATGTAGATGCTGAACAATTGCGACAGGCCCTAGTCCAGGTGAAAAAAACTGGGCGGTCTTTGCCCGAGGAACTTAAGGCAGTCACTGGCCGAGAATTGTCCCCAGAACTACTGCGGCAGTACAAAAAAAATCAGTTATTTGAGCTCAAAGTACTTTACGGGGTGGACAGCGTCGATCCGGAGGTTGCCCCGATCGCCACCCAGCAAATGGCCGAGTTGATTGGGCGATTTTTTCCTTTGGATACTTGTCGGCGATTCAAGTTTTTGCCCTTAGCCCAGCAGGAAGGCGACCCCCCCAGTGTGCTAGTG…	MTSSSSSKKSRAVALRNYFSPFGNKLVAGGHVDAEQLRQALVQVKKTGRSLPEELKAVTGRELSPELLRQYKKNQLFELKVLYGVDSVDPEVAPIATQQMAELIGRFFPLDTCRRFKFLPLAQQEGDPPSVLVAMVDPDNLAAQDELNRILRVKGFELRRLVVTQDDFNQLLEQYYAIREEWEAAQEKRDQERALDKLNDLTDIVGSIDMNLGEDKEDVDNALDSNDANQAPVINLVNKILAKALQEGTSDIHVEPQEETLRIRFRKDGVLNQAFDPLPRKITPAVVARFKIMADMDIAERRSPQDGKIRRIYQGRKVDFRVNTLPSRYGEKVCLRILDNSATQLGLDFLITNPETLQTVRELAARPYGLMLVTGPTGSGKSTTLYSVLAERNSPEVNI…	pilus biogenesis protein homologous to general secretion pathway protein E	pilus biogenesis protein homologous to general sec retion pathway protein E
NC_000911.1:3468873-3470885:+	NC_000911.1	HRIBO	CDS	3468873	3470885	+	slr1664	SGL_RS17885		2013	671	Yes	0.747235	1.98473	1.36598	0.508689	2.52648	1.51758	9.46	19.49	12.66	9.82	12.66	9.82	6.44	24.81	ATG	TAA	ATCAGCAAGACTTTT	ATGGACTATTTTTTAGTTTGTGGGTTAGGGTATCTGGGACAACATTGCGTTGTTGCGCTGAAAAAATTTGGCGTTAAGGTAATTGCCATTGAAAAACAGCCACCGCCCCAGTGGGAAATTAAAAATTTAGACCATTACCTAGACCGATTAATTATTGGCGACTGTAGTCAAGCTAATATTTTACTCCAGTTGCCTATTAGTCAAATTCGAGCTGCTTTAATTGTTACCACAGTCGAAAAAATTAATCTTGAAACAGCCATAACCATTCGTACTTTAAATGCTAATACCCGTTTAGTTGTCAGAAGTGTACGGGATAATCTTAATTTTTTATTGAGTAACGAATTAGGGAATTTTATTGCCTATGAACCCAAACATTTGCCAGCCAATGCTTATGCCCTT…	MDYFLVCGLGYLGQHCVVALKKFGVKVIAIEKQPPPQWEIKNLDHYLDRLIIGDCSQANILLQLPISQIRAALIVTTVEKINLETAITIRTLNANTRLVVRSVRDNLNFLLSNELGNFIAYEPKHLPANAYALSALGKETISLLNLGGIKIRINRLQVPGYHHWLSYSCVDEINNRHRRILSHDRQGDSPSQSIEFHCWHPEAKIQPQDTIIYVETEDNYSLNKGYGINPNRKKISLNFLYYRSLIQTKISDWVKNFWGLSLKQQVARVAIIYGLVVFLLLITGTVLFRFFYPGTTLVSSFYVTAILLLGGYSDLFDSFEPISTLPEWLQLFSLALTVTGTAFVGVLYALLTQALLSSKFQFYNKRPPIPEADHVVVIGLGKLGQEITKKLRELKINVL…	hypothetical protein	hypothetical protein
NC_000911.1:817967-819979:-	NC_000911.1	HRIBO	CDS	817967	819979	-	sll1070	SGL_RS05660	tktA	2013	671	Yes	0.930855	6.84609	3.88847	0.171522	1.64257	0.907044	124.93	470.6	134.21	68.74	134.21	68.74	23.02	112.91	ATG	TAG	ATTTTTCCAAACATT	ATGGTCGTTGCTACCCAGTCCTTAGACGAACTTTCTATTAATGCCATTCGCTTTTTAGCCGTTGACGCCATTGAAAAGGCCAAATCTGGCCACCCTGGTTTGCCCATGGGAGCCGCTCCTATGGCCTTTACCCTGTGGAACAAGTTCATGAAGTTCAATCCCAAGAACCCCAAGTGGTTCAATCGGGACCGCTTTGTGTTGTCCGCCGGCCATGGCTCCATGTTGCAGTATGCCCTGCTCTATCTGCTGGGTTATGACAGTGTGACCATCGAAGACATTAAACAGTTCCGTCAATGGGAATCTTCTACCCCCGGTCACCCGGAGAATTTTCTCACTGCTGGAGTAGAAGTCACCACCGGCCCCTTGGGTCAAGGCATTGCCAATGGTGTGGGTTTAGCC…	MVVATQSLDELSINAIRFLAVDAIEKAKSGHPGLPMGAAPMAFTLWNKFMKFNPKNPKWFNRDRFVLSAGHGSMLQYALLYLLGYDSVTIEDIKQFRQWESSTPGHPENFLTAGVEVTTGPLGQGIANGVGLALAEAHLAATYNKPDATIVDHYTYVILGDGCNMEGISGEAASIAGHWGLGKLIALYDDNHISIDGSTDVAFTEDVSKRFEAYGWHVLHVEDGNTDLAAIAKAIEEAKAVTDKPSMIKVTTIIGYGAPNKSDTAGIHGAALGTDEVAATRKNLGWDYAPFEVPQEVLDYTRKAIERGASYEAEWNQAFAQYKTKYPTEAAAFERQLSGALPEGWDKTLASFTPDQKGLATRKYSEECLNALAPVLPELIGGSADLTHSNLTELHCSGD…	transketolase	transketolase
NC_000911.1:1006234-1008246:-	NC_000911.1	HRIBO	CDS	1006234	1008246	-	sll1452	SGL_RS06585	nrtC	2013	671	Yes	0.519509	8.23087	4.37519	0.0452653	0.254091	0.149678	114.77	744.4	220.92	90.44	220.92	90.44	10	22.98	ATG	TAG	ACCCCCGGACTAACT	ATGATGCCCTTCATTGAAATTGATCATGTTGACCGTATTTTTCCCCTCCCCGACGGGGGGCGTTACATTGCCCTCAAAAACATTGAGCTGAAAATTAGTCAGGGAGAATTTATTTCCTTGATTGGTCACTCTGGCTGCGGCAAGTCTACCTTGTTGAACATGATCTCTGGGCTAGATAAGCCCACCTTTGGCGGGGTCATCATGGAGGGGAAAGAAATCACCGAGCCTGGCCCTGAAAGGATGGTGGTGTTTCAAAACTACTCCCTGTTGCCTTGGTTGACGGTGCGACAAAATATCGCCCTGGCTGTGAATCGAGTTCTGCGGGATCTGCCCAAACCAGAACAAGAAAAAATTATTGACGACAATATTGCCCTGGTGGGGTTACAACGGGCAGCCCAT…	MMPFIEIDHVDRIFPLPDGGRYIALKNIELKISQGEFISLIGHSGCGKSTLLNMISGLDKPTFGGVIMEGKEITEPGPERMVVFQNYSLLPWLTVRQNIALAVNRVLRDLPKPEQEKIIDDNIALVGLQRAAHKRPGELSGGMKQRVAIARALSTRPKVLLLDEPFGALDALTRGNLQERLMEIVQESGVTCIMVTHDVDEALLLSDRVVMLTTGPEAHIGQILEVPIPRPRHRLEVVNHPSYYALRGEMVYFLNQQKRAKKVGAVSQFAEAMGGNGLEKINLDLGFIPLTDCAPLVVAKEKGFFQKHGLEQVNLVKEPSWQAIADGIRERRLDGAQMVAGMPLALTLGMGGKTPLPMVTAMVMSRNGNAITLSKKFAEAGVKTLEDLRLKLAETPDQV…	nitrate/nitrite transport system ATP-binding pr otein	nitrate/nitrite transport system ATP-binding prote in
NC_000911.1:2610706-2612715:-	NC_000911.1	HRIBO	CDS	2610706	2612715	-	sll0459	SGL_RS14040	uvrB	2010	670	Yes	0.560526	3.43081	1.99567	0.230921	2.03003	1.13047	8.52	26.28	15.2	7.66	15.2	7.66	3.51	15.55	ATG	TAA	AGCTCCTTTGCCGCC	ATGACTTCTGACCTCTTTTCCCTCCATGCGCCCTTTCGTCCTACCGGAGATCAACCCACGGCGATCGCCAGTTTGATCGAGTCTTTGCAGGGAGAGCACAAGTTTCAAACCCTGCTGGGGGCAACGGGAACGGGGAAAACCTTCACCATGGCTTCGGTTATTGCGGAGTTGGGACGACCAACATTGGTATTAGCCCACAATAAAACCTTGGCGGCCCAATTATGTAATGAATTGCGGCAATTTTTTCCCGAAAACGCGGTTGAATACTTCATTAGTTATTACGACTATTACCAGCCAGAAGCCTATATTCCCGTCACCGATACCTATATCGAAAAAACGGCTTCTATCAACGATGAGATTGATATGTTGCGTCACTCCGCCACCCGTTCTCTGTTTGAA…	MTSDLFSLHAPFRPTGDQPTAIASLIESLQGEHKFQTLLGATGTGKTFTMASVIAELGRPTLVLAHNKTLAAQLCNELRQFFPENAVEYFISYYDYYQPEAYIPVTDTYIEKTASINDEIDMLRHSATRSLFERRDVIVVASISCIYGLGIPSQYLKAAVPLQVGAEYDPRLVIRDLVNVQYSRNDVELQRGRFRLKGDVLEIVPAYEDRVIRIEFFGDEVEALRLIDPVSGEILQSLDRISIYPARHFVTPEETLEKACQQIQTEMEQQVAFLEKNNLLVEAQRLSQRTRYDLEMLREVGYCNGVENYSRYLADRQAGEPPECLVDYFPEDWLLVIDESHVTIPQLRGMYNGDQARKKVLIDHGFRLPSAADNRPLKAEEFWQKVKQCVFVSATPGVW…	excinuclease ABC subunit B	excinuclease ABC subunit B
NC_000911.1:10622-12631:-	NC_000911.1	HRIBO	CDS	10622	12631	-	sll1209	SGL_RS01920	lig	2010	670	Yes	0.421617	2.00222	1.21192	0.300498	1.28107	0.790782	11	27.07	26.09	13.52	26.09	13.52	7.84	17.32	ATG	TAG	AACAGTATTGAAGTT	ATGACCACCCCCGATCGCCTATTGCAACTGCGCCAACAACTCCAAAAAGCCAGCTACGCCTACTATGTACTGGATGCGCCGGTCATGGAGGACAGCGTTTACGACCAGCTTTACCGGGAACTGCAAAGGCTAGAGGCAGAAAATCCGGAGTTAATTACCCCCGACAGTCCGACCCAACGAGTGGGGGAGCAACCGGCCAGTCAGTTCCGCTCTGTTGCCCATAATATTCCCCTCTACAGCCTAGAAAATGCCTTTAATGTGCAGGAATTACAACAGTGGCAAGAACGCTGGCAACGCATTGCCCCAACCATCGAAAAGGCTGAATACGTCTGTGAGCTAAAAATTGACGGCTCGGCGATCGCCCTGACCTATGAGAATGGTTTGTTGGTGCGGGGGGTA…	MTTPDRLLQLRQQLQKASYAYYVLDAPVMEDSVYDQLYRELQRLEAENPELITPDSPTQRVGEQPASQFRSVAHNIPLYSLENAFNVQELQQWQERWQRIAPTIEKAEYVCELKIDGSAIALTYENGLLVRGVTRGDGTTGEEISQNIKTIRSIPVKLNLDNPPPTVEVRGEAFLPLEEFNRINHEREAQGESLFANPRNAAAGTLRQLDPKIVHQRRLQFFAYTLHLPGQEDKIQSQWQALEYLKKAGFMVNPHCQLCKGLDEVVAYFEDWEGARQRLPYMTDGVVVKINQYPLQRELGFTQKFPRWAIALKYPAEETPTVVKAIEVNVGRTGAVTPLAVMEPVQLAGTTVQRATLHNQDRIQELDIRVGDTVIIRKAGEIIPEVVRVMTELRPENTT…	DNA ligase	DNA ligase
NC_000911.1:2239239-2241248:+	NC_000911.1	HRIBO	CDS	2239239	2241248	+	slr1939	SGL_RS12410		2010	670	Yes	0.163413	2.0654	1.11441	0.141058	1.87455	1.00781	5.19	34.74	31.76	16.82	31.76	16.82	4.48	31.53	ATG	TAA	TCCGCTTTTACTTCC	ATGAATGCCCATGAAATTGCCCTGACCCTGCAAAAGGGACTTAAAGCCCTGCAAAATCAAGAATATCAGTCGGCGATCGAGGCTTTAGAAATGGTTTGCCGCCGGGTGCCCCAGCAGGAATCCCCCGAATTTCTCAAAGCTCAGATGGCCTTAGTGAGGGCCTACAGAGCCATAGGGAGATTTGATCAGTCCCGGGAAATCTGCGAATACTTAACCCGGAACCCAAACCCAGAGGTACAAAATTGGGCTAAAACGATGATGCTGATGCTCCTTAAACAGGAGAATGGGGCTGAAGGGGAAGCGGATGAGGATGTACTGTCCACTAATTTGAAAGCCGGTCGAGCGGAAAATAATCGGGTTAAGGTGGCTTTGCCCAGGGTAGCGGATAGTTTGCCTTTT…	MNAHEIALTLQKGLKALQNQEYQSAIEALEMVCRRVPQQESPEFLKAQMALVRAYRAIGRFDQSREICEYLTRNPNPEVQNWAKTMMLMLLKQENGAEGEADEDVLSTNLKAGRAENNRVKVALPRVADSLPFIFGMGLLVPLLTTSVLFTPLAWWLAQGQWQKLLAISLGLGIVVNFLALFYNVPIIDLINRRIYGTQWVNLGAVQKYSPEAGELMLRVARAKTFPIPKLGIIPDNRPVMFTYGVQQNNSRVVLSQGIFRYLSAEEIATLLGHELAHIVRRDCALLTCMSGWGQVFYWLYCELQMARTSQPAIAKILITPLVWICLAMFRINQGSNRYFARTREYYADHFSVNYTGNPNALTRALVKMTRALVKRERQAEKPALFLEGMRNFANYDAY…	unknown protein	unknown protein
NC_000911.1:2845180-2847189:-	NC_000911.1	HRIBO	CDS	2845180	2847189	-	sll0830	SGL_RS15140	fus	2010	670	Yes	0.762204	6.72721	3.74471	0.53016	1.42857	0.979366	43.72	98.89	57.36	14.7	57.36	14.7	30.41	21	ATG	TGA	TTCAGGTATTTTTTT	ATGAACAACCCCACCAATGAATCCCTCCGCAACGTGGCCATTGTTGGCCCCTATGGCAGTGGTAAAACCACCCTGCTTGAAAGTGTTTTGTGGGTTAGTGGCAGTGTCAGCCGTAAGGGGAATATCAAAGACGGCAACACAGTGAGCGATAGCAGCCCTGAGGCCAAGGCCCGCCAAATGAGTGTGGAAGTGAGTGTGGCAGGGATTGATTATGAAAATTTGCGCTTAAATTTCCTCGATTGTCCAGGTTCCATCGAGTTTGCCCAGGAAACCTATGGAGCGTTGGTCGGCGCCGGTACTGCGGTCATCGTTTGTGAGGCGGATGTGAGTCGGGTTTTGACCCTCGCCCCTTTGTTTAAATTTTTGGATGATTGGGCCATTCCCCATCTGGTGTTTATC…	MNNPTNESLRNVAIVGPYGSGKTTLLESVLWVSGSVSRKGNIKDGNTVSDSSPEAKARQMSVEVSVAGIDYENLRLNFLDCPGSIEFAQETYGALVGAGTAVIVCEADVSRVLTLAPLFKFLDDWAIPHLVFINKMDRAKQPFGEVLQALKSVSSRPLIPQQYPIYKGEELQGYIDLITEQAYQYHTGSAADPIALPAELAGAEHQARQEMLEALADFDDRLLEELLEEVEPPQAEIEADFKQELGADLIVPVVLGAAEQDFGVRPLLDVLIKEAPDPSVTAARRSLSTDGSGPVIAQVLKTYFTPQGRLSLARIWQGTLREADSLNGQRLGGIYRLFGNQQTPVQTATVGEIVGLARLENINTGTTLSTADVKPLPFVEPLPPVYGLAIAPEQRKDEV…	elongation factor EF-G	elongation factor EF-G
NC_000911.1:2188230-2190236:-	NC_000911.1	HRIBO	CDS	2188230	2190236	-	sll0147	SGL_RS12160		2007	669	Yes	0.999493	4.47228	2.73589	0.384381	1.72998	1.05718	19.71	43.56	19.72	9.74	19.72	9.74	7.58	16.85	ATG	TAA	GTCCATTTCCAACCC	ATGCGTGAACTGCTCTACTGTGAAGTCCCCACCCCTGCCACCGCTGAAGTTGTCGCTTGGCTTCAGGGAAATTGGTCGCCCTTAGTGGGGCAAAAGTTGCCTACGGAGCAAGGTTTACGGTTGCGGGGTTCCTCCGGCCAAAGCAGTGAACTATCCATTTTTGTGTGGTCTCTACAAAGAACTACCTATCTTAAGTGTGTGCGTTGGGGTGACACTAGCTTCCCCCAAGAAACGGCGATCGCCAAGGAATTAAGGCGGGCATTAGGGCAAAAATTTCCTCCCACCTATCCGGTCCCACCGGCGATCGATCTGGATCGGCAAAATATTTTCCAGGCGTTACAAGATCGATATCCTGAAACGGTTAAATTCTTCCAAAAATTTCCCCAAGGAGAATATGAC…	MRELLYCEVPTPATAEVVAWLQGNWSPLVGQKLPTEQGLRLRGSSGQSSELSIFVWSLQRTTYLKCVRWGDTSFPQETAIAKELRRALGQKFPPTYPVPPAIDLDRQNIFQALQDRYPETVKFFQKFPQGEYDLKRVYWWEQRWRDNVANPQTPRQVVSQTSTVTAIAPATPEFDLIYLGGALGSVHAAVMARLGYRVLLIERLPFGRMNREWNISRDEFQRLIDLNLFTPEEFESVIAREYRDGFNKFFDAYNPPHLKANVLHTPTVLNIALDSAKFLAICGHKLQQAGGIIWDETEFINATIDPNKVVVHCINLENNQTKLAQARLLVDAMGTASPIAWQLNGGKTFNSVCPTVGAVVEGLDPVVWDNAYGDVLNSHGDISRGRQLIWELFPGAGDE…	hypothetical protein	hypothetical protein
NC_000911.1:213031-215037:-	NC_000911.1	HRIBO	CDS	213031	215037	-	sll1033	SGL_RS02865		2007	669	Yes	0.543367	2.9499	1.74663	0.248846	1.44423	0.846535	43.54	119.53	80.13	40.52	80.13	40.52	19.94	58.52	ATG	TAG	CGTCTCGCCTAAATT	ATGCTGATCTGTCTCCAGTGCTCCGCCGAAAATCCTAATCGCAACACTGATTGCCAAAAGTGTGGGGCGTCCCTGAAGGAGCATCCCTGTAATCAGTGCGGAGAAATGGTGCAGTACGGAGAAGCCCATTGTCCCCATTGCGGGGCGATCGCCGGTCAGATATTAACAGTGTTGGTCACGGTGCCAGTGGCGGTGGGCCCGGATGGGAAACCGGAACAGAGTTTTGATCCCCAAGGGATCAGGCTTTATGAAAACTTCATTGATGTGGGTCAACGCTACCAACTCCTCACTCCCGTGGAAGAAAACCCATTTGTGGTGGATGAAGTGGGGGAAGGGGAACAAATCGTGCTCAAAAGCAGGGTGGTGGACTGCCAACCTTTACAGCCTTCTGTACTAAAA…	MLICLQCSAENPNRNTDCQKCGASLKEHPCNQCGEMVQYGEAHCPHCGAIAGQILTVLVTVPVAVGPDGKPEQSFDPQGIRLYENFIDVGQRYQLLTPVEENPFVVDEVGEGEQIVLKSRVVDCQPLQPSVLKVLLSQQGDLLTRLPQMSDGEIMANDTWSSLNLPKAIIPYFRFPVLMPKIPEVYDAWCDGDYGFVLMEDRSEWDVLADVLRDEGDSLPGLEMVFWINQLFQLWQQLSSAGCGKGLLMGQNLLVDEDQNIALEQIYANGGTPVSLEEFGSLLHGYFSPVPSAGEDLLAILQRAAQGEYQDVDDLFADIEDLVITVEEEGENFIIHEVDFEQIPDDVFAAIESGESAFKSEEVAPSINPVTMPDVNVFDSEEVDDVPTAVLPMQLISLV…	probable protein phosphatase	probable protein phosphatase
NC_000911.1:3173335-3175338:+	NC_000911.1	HRIBO	CDS	3173335	3175338	+	slr0043	SGL_RS16580	cmpC	2004	668	Yes	0.730964	9.62109	5.17603	0.260729	2.25781	1.25927	15.84	73.89	21.67	7.68	21.67	7.68	5.65	17.34	ATG	TAA	ATCTTCTGACCCACC	ATGAGTCTTTTTGTTGCTGTTGATAATATCGATAAGGTTTTTTCCCTCACCGATGGAGGTGAATACATCGCCCTCAAGGGGATTAACTTGGAAATTAAAAAGGGGGAATTTGTTTCCCTGATTGGCCACTCCGGCTGTGGTAAGTCAACTTTGCTAAATATGATTGCGGGGTTAGATTTACCAAGTGAAGGCATTGTTACCCTGGAAGGTCAGCGGATCAAGCAGCCCGGCCCGGACAAAATGGTGATTTTCCAAAATTACTCCCTACTGCCTTGGTTAACGGTGAAGCAAAATATTGCCCTCGCTGTGGATGAGGTGATGAAGGGGGCATCGGCGGCGGAACGCAAGGCCATTGTTGAAGAACACATTAATTTAGTGGGCCTAGGCCATGCAGTGGAT…	MSLFVAVDNIDKVFSLTDGGEYIALKGINLEIKKGEFVSLIGHSGCGKSTLLNMIAGLDLPSEGIVTLEGQRIKQPGPDKMVIFQNYSLLPWLTVKQNIALAVDEVMKGASAAERKAIVEEHINLVGLGHAVDKRPGELSGGMKQRVAIARALAIRPKLLLLDEPFGALDALTRGNLQEQLMRICEQYQVTAVMVTHDVDEAVLLSDRIVMLTNGPGSNIGGILEVDIPRPRKRMEVVEHPSYYSLRSEIIYFLNQQKRIKKLRAKKTTAIARHGLEKVNLELGYVPLVACAPLVVAQEKGFFAKHGLDEVSLVRETSWRGIVDGIAGGYLDGAQMPAGMPTWLTAGGYREQSIPVVSALTMTRNGNAITLSKKLYDQGIYTAEDFRQLLLASDGDRHT…	bicarbonate transport system ATP-binding protei n	bicarbonate transport system ATP-binding protein
NC_000911.1:693211-695211:-	NC_000911.1	HRIBO	CDS	693211	695211	-	sll1290	SGL_RS05100	rnb	2001	667	Yes	0.798945	3.30641	2.05268	0.449371	1.84928	1.14932	71.17	153.12	89.08	46.31	89.08	46.31	40.03	85.64	GTG	TAG	AGCAAAGGCATTCCG	GTGGAAAAAGGACAACTAATTGAATTCCGGCATCAAGGAGAACGGCGGTTGGCGGTGGTCGATCGCCCGGACGGCAAAAAAGATTGGGTGGTTATTGATCAACAGGGCCAAAGCCATAAACTGAAGCCCCAGCGGGTGGAGTATGAAATTCCCGGCGGTCCCTACACCGTCGATGATCTGCCTAGTTTTTTAGGGGAAGTGGACCAGTATCTCGACCCCTCTAGTTTGGAGGTGGCCTGGGAACTATTGATTGAAGAGGGGGAAAGCATCACCCCGGCGGATTTGGCCCTATTGCTATTTTCTGAGCAAAGTCCTAGTCAATGCTATGCTGCCCATGCCCTGCTAGCAGAAGATAAACTCTATTTCAAACAAAAAGGCAATCATTACGAACCCCGCCCT…	VEKGQLIEFRHQGERRLAVVDRPDGKKDWVVIDQQGQSHKLKPQRVEYEIPGGPYTVDDLPSFLGEVDQYLDPSSLEVAWELLIEEGESITPADLALLLFSEQSPSQCYAAHALLAEDKLYFKQKGNHYEPRPSSQIEEIKHQMRVQAQKEQEQQGFIDRVNQALAGEKVTWEGSDRLRLEALEKFILFPEQNHRQALDILQTLGKPGRTDETQNLLIELGIWQRHENLFLRRSAYPNQFPAKVSDVAHAYLTNPPPDPDQERFDLTTLKTYTIDDESTSEIDDGLSVETLADGGHRLWIHVADPTRLLSPNDELDLEARKRSTSLYLPTGMISMFPPELATGPMSLLQGQRCVALSFGVTLDEVGAVRDFTIAPSWVKPTYRLTYEDVDEMLVLKIQG…	probable ribonuclease II	probable ribonuclease II
NC_000911.1:124452-126443:-	NC_000911.1	HRIBO	CDS	124452	126443	-	sll0698	SGL_RS02430	dspA, dfr, hik33, nblS	1992	664	Yes	0.342846	1.82353	1.08319	0.150592	1.1705	0.660546	26.91	61.07	78.49	33.49	78.49	33.49	11.82	39.2	ATG	TAG	TTTGGCAAGGAGATT	ATGGGGACTTCTGTGTCCAATCCAACGGCGATTTTGCAGACTATGCAGGGTTTTCTGCGTAAATGGTGGTCTGAGTTCAACCTACAAACCCGGTTGATGGCCGCGGCCACCTTGGTGGTGTCCCTGTTAATGAGTGGGCTAACTTTTTGGGCAGTAAATACGATCCAAGAGGATGCCCAATTGGTGGATACCCGTTTTGGCCGGGATGTGGGTTTGTTGTTGGCGGCCAATGTTGCCCCTATGATTGCGGATAAAAATCTGACGGAGGTGGCCCGGTTTTCCAGTCGCTTTTACGAAAATACTTCTAATATCCGCTACATGATCTATGCGGACCCCTCTGGCAAGATCTTTTTTGGTATTCCCTACTCTGAAGAAACGGTTCAAAACTCCCTCACCCTA…	MGTSVSNPTAILQTMQGFLRKWWSEFNLQTRLMAAATLVVSLLMSGLTFWAVNTIQEDAQLVDTRFGRDVGLLLAANVAPMIADKNLTEVARFSSRFYENTSNIRYMIYADPSGKIFFGIPYSEETVQNSLTLERRIELPQIDPHNFDQPFVRQHHTPNGDVTDVFIPLQYQGKFLGVLAIGINPNPAAVNSSNLTRDVTIAVFISIWVMVILGAVFNALTITQPIKELLLGVKNIAAGNFKQRITLPFGGELGELIVNFNEMAERLERYEAQNIEELTAEKAKLDTLVSTIADGAMLVDTNLQLLLVNPTARRLFAWENKPIIGENLLENLPPEITAQLTQPLRELAADQGSLLFSPGHGPQEEEQDKTYAPEEFRISLTQPFPRTIRLMLTQVLDQN…	drug sensory protein A, low temperature sensor, two-component sensor histidine kinase	drug sensory protein A, low temperature sensor, tw o-component sensor histidine kinase
NC_000911.1:518287-520272:-	NC_000911.1	HRIBO	CDS	518287	520272	-	sll1003	SGL_RS04300	hik13	1986	662	Yes	0.331153	1.23519	0.783171	0.646254	5.25045	2.94835	5.57	13.76	16.82	11.14	16.82	11.14	10.87	58.49	ATG	TAA	TTGGGCGTTAAGGCT	ATGTCTGTTTTCTTGCTCGGTTCTGAACCAGAAAGATTTTTGCAGAAACTAGAAGGTGTAATTCCCGGCTGGCTGTACCGATTTGTCCAGCATAGCGATGATTCCATTGCTTTTACCTATATTAGTCCGCAAATTGAACTTCTCCATGAAGTAACTGCGGCCGCTGTGTTGGCTGATGCTGAAATTTTACTCAAACAAATTCACCCCGATGACCAAATCTTGCAAAGGCAGGCCCTAGCCCACAGTCGAGCCACCCTGGAGCCATTATGTTTGGAATGGCGCATTATTACCCCATCGGGGAAATTAAAGTGGCTGCGTACCAAGTCTCAACCAGAAAAATTGGCTAATCAAGATACGGCTTGGTTTGGGGTAGTGCTGGATATTACGTCGGAAAAACAG…	MSVFLLGSEPERFLQKLEGVIPGWLYRFVQHSDDSIAFTYISPQIELLHEVTAAAVLADAEILLKQIHPDDQILQRQALAHSRATLEPLCLEWRIITPSGKLKWLRTKSQPEKLANQDTAWFGVVLDITSEKQTEQQLIESNHHLQQSEQKFRLAFENANVGMCMVDLEGHLIKVNDKMGKIFGYSRQELEKMTVNDLAVPEDKQVSPTFIQNAITEHQDHATLEKRYIHRQGHIIYGEVSTSLVRGINGEPLYFISHVKDISKRVKYEQEITKSRDEIRQINQELEERVKLRTKEVYEQQQLLRLYFDQSIIGLAIVSTDKTWINVNPKLCQIVGYSPEELRIKTWAEITHPDDLELDLSNYQRLLDGEIDGYEIDKRYIHKDGHNIYVNLGVQAHRR…	two-component sensor histidine kinase	two-component sensor histidine kinase
NC_000911.1:2735806-2737791:-	NC_000911.1	HRIBO	CDS	2735806	2737791	-	sll0182	SGL_RS14635		1986	662	Yes	0.510746	4.65528	2.58301	0.126422	1.05025	0.588337	12.12	46.32	23.73	9.95	23.73	9.95	3	10.45	ATG	TAA	CGGCTTTTGAGAATT	ATGACCCAAGCCCAAGCCAAGCGTTTTCAGTTTGATCGCCAACTGTGGCACCGCTTTGTTGAAACTGCCCAGCCCTATTTTTATCCGGTGGGGCAAAAGCAAACTCGGGTTTTTCTCGGTCTCATCCTGGCCCTCATGGTGGTGGTGGTGGCCTTGACCCTATTTTTATCCATGGGGTTGACCCTCTGGGCCACAGCAATTTTCCCTGACTTTTTTGCTAAATCTGGTGAGGGTTTGGTAGATGGGGTACAAGGTCTGATCAATTCCCCGGCTCCTTGGATCGGTTTAGTGGCCTTGGCCATGGCCGGGGCTGTTTTCATCAGCCAGCGCCAAAAATTACAACAACGGTGGCTCCAGTGGTTGCTGTTGGGCGTATTATTATCTCTACTATTTGTTGTC…	MTQAQAKRFQFDRQLWHRFVETAQPYFYPVGQKQTRVFLGLILALMVVVVALTLFLSMGLTLWATAIFPDFFAKSGEGLVDGVQGLINSPAPWIGLVALAMAGAVFISQRQKLQQRWLQWLLLGVLLSLLFVVNGLNVILSFVFRFIDTALNGKDAEVFWQFLWIYGIVIVVAIPIIVAYRYLRQKLGVLWRQWLTEHFLGRYFKGRSYYHLDSNSAYTLIDNPDQRITQDIQSFTGVTLDFLLDILDSILTLISFTAILYTISQTLMWGLIGYAVFGTVVAIAIGTRLIRINYEQLRLEANFRYGLVRVRDNAESIAFYRGEGLERKQVTDRLLGAIRNFNLLIIWQALISLFQLGYNYFTRLIPYIIIAPLYLAGDLDFGAIAQASLAFGMVLSALS…	ABC transporter ATP-binding protein	ABC transporter ATP-binding protein
NC_000911.1:8492-10471:+	NC_000911.1	HRIBO	CDS	8492	10471	+	slr1312	SGL_RS01915	speA	1980	660	Yes	0.443725	3.39647	1.9201	0.217274	1.65945	0.93836	16.44	67.42	37.05	19.85	37.05	19.85	8.05	32.94	ATG	TGA	TTCGATAGAGGAATT	ATGGGGGAAGAACCTGTGCCGGCGGATAAAGCATTAGGCAAGAAATTCAAGAAAAAAAATGCCTCCTGGAGCATTGAAGAAAGCGAAGCTCTGTACCGGGTTGAGGCCTGGGGGGCACCTTATTTTGCCATTAATGCCGCTGGTAACATAACCGTCTCTCCCAACGGCGATCGGGGCGGTTCGTTAGATTTGTTGGAACTGGTGGAAGCCCTGCGGCAAAGAAAGCTCGGCTTACCCCTATTAATTCGTTTTTCCGATATTTTGGCCGATCGCCTAGAGCGATTGAATAGTTGTTTTGCCAAGGCGATCGCCCGTTACAATTACCCCAACACCTATCAGGCGGTTTATCCGGTCAAATGTAACCAGCAACGACATCTGGTGGAAGCCCTGGTTCGCTTT…	MGEEPVPADKALGKKFKKKNASWSIEESEALYRVEAWGAPYFAINAAGNITVSPNGDRGGSLDLLELVEALRQRKLGLPLLIRFSDILADRLERLNSCFAKAIARYNYPNTYQAVYPVKCNQQRHLVEALVRFGQTSQCGLEAGSKPELMIALATLPPPLDRQDKHTKPLIICNGYKDQDYLETALLAKRLGHRPIIIIEQLRELEWVLHISQQLNIKPMLGVRARLSCQSLKSSEISSGNGDRAKLGLTMPDIVTVIHRLEENNCLDCLKMLHFHLGTQVSDIALIKEAMREASQLYVELVKLGAKMRYLNVGGGLAVDYDGSKTNYPASKNYNMQNYANDIVAAIQDACELGQVSPPILVSESGRAIMAHQSVLVFDVLGSNQTGFSEPHPPDENAH…	arginine decarboxylase	arginine decarboxylase
NC_000911.1:3514232-3516208:-	NC_000911.1	HRIBO	CDS	3514232	3516208	-	sll0430	SGL_RS18085	htpG	1977	659	Yes	1.61045	15.3187	8.46456	0.18697	1.28995	0.738461	47.46	160.08	29.47	10.45	29.47	10.45	5.51	13.48	ATG	TAA	TAAATCTAAAGACCT	ATGGCAGTACTCGAAAAAGGCAATATCACAATCCATACCGAGAATATTTTCCCGATTATTAAAAAGTCTCTCTACACTGACCATGAAATCTTTTTAAGGGAATTAATTTCCAACGCCGTTGATGCCATTAGTAAACGGAAAATGGCTGCTTTTGCCAGCGACGGCTCTGGAGAAGTGCCCGATCCCCAAATTACACTGGTAGTGGATAAGGTGAATAAAACCCTTTCTATTACCGATAACGGCATTGGCATGACCGCCGATGAAGTGAAAAAGTACATCAACCAAGTGGCTTTCTCCAGTGCGGAGGAGTTCATTGAAAAGTTCCAAAAGTCTGCCAATGATTTGATTGGTCACTTTGGTTTGGGTTTCTATTCCGCTTTCATGGTGTCCCAAAAAGTG…	MAVLEKGNITIHTENIFPIIKKSLYTDHEIFLRELISNAVDAISKRKMAAFASDGSGEVPDPQITLVVDKVNKTLSITDNGIGMTADEVKKYINQVAFSSAEEFIEKFQKSANDLIGHFGLGFYSAFMVSQKVEIDTLSYQEGAQAVHWSCDGSPEFELTDSDRQQVGTTVTLTLLDDEQEYLETGRIRQLVKTYSDFMAVPIRFEGETLNKQRAIWKESPQNLTKEDYLEFYRYLYPFQEDPLLWVHLNTDYPFLLNGILYFPKLRPDVDVSKGQIKLFCNQVFVSDHCEEVIPEFLMPLRGVIDSPDIPLNVSRSALTNHRTVRRIADYIAKKVGDRLKSLYDENPAEYLKCWEDIGTFVKFGSLREDKFKQQVEDLLLYRTTYKATAESTEPKVEV…	HtpG, heat shock protein 90, molecular chaperon e	HtpG, heat shock protein 90, molecular chaperone
NC_000911.1:891276-893249:+	NC_000911.1	HRIBO	CDS	891276	893249	+	slr1208	SGL_RS06055		1974	658	Yes	0.411862	2.69574	1.5538	0.205931	1.44125	0.823591	17.5	52.54	42.49	19.49	42.49	19.49	8.75	28.09	ATG	TAG	TTGACCGGAGGCGTT	ATGAAGAGTTTATGGGATGACCAGGAAGCCAACCAATACCAAGGGGATTTACCCCAACGGGTCTATACATCCCGTTTGCTGGGCCGGGAACCATCCCTAGTGCTCCATGGCGGCGGCAATACCTCGGTGAAATGCCAGGTAACTAATTTGGTGGGGGAGAAGGAAGATATTCTCTATGTCAAGGGTAGTGGTTGGGATTTGGCCACCATTGAGGCGGCGGGGTTTGCCCCAGTGAGAATGCCCCATTTGCTCAAGCTGTCTAAGTTGACGCAATTATCCGATCGCCAGATGGTCAATGAATTGAAAACCCAGATGACCCTGGCCAGTGCCCCCAGCCCTTCGGTGGAAACCATTCTCCACGCTATTTTGCCGTTTAAATATGTGGACCATACCCACGCT…	MKSLWDDQEANQYQGDLPQRVYTSRLLGREPSLVLHGGGNTSVKCQVTNLVGEKEDILYVKGSGWDLATIEAAGFAPVRMPHLLKLSKLTQLSDRQMVNELKTQMTLASAPSPSVETILHAILPFKYVDHTHADAVVTITNTANGEERIREIYGDHLVIIPYVMPGFDLARVCAEKFAAEAHGGTVGMVLMNHGIFSFGAIAREAYEGMISLVNEAEEYLKNQGVWQISYGQPQKSTTENRLALAQLRCDASKIAGFPLVMRQYQDEASLSFSQRPDLAHISQQGPATPDHVIRTKRLPQLGRDVADYAKKYQEYFQRNDGKSGEVKTMLDPAPRIILDRELGLLTLGTSAKSTAIAGDIYQHTMAIIQRAKGLGGYQALPESDIFVVEYWDLEQAKLK…	probable oxidoreductase	probable oxidoreductase
NC_000911.1:2653153-2655123:+	NC_000911.1	HRIBO	CDS	2653153	2655123	+	slr0633		thiG	1971	657	Yes	0.479717	3.85038	2.16505	0.131965	1.03093	0.58145	19.63	60.99	40.92	15.84	40.92	15.84	5.4	16.33	ATG	TAG	TGATTTTTTAAGGTT	ATGCAAACAACCAGTGACGTTCTCATTATTGGCGGTGGCATCATCGGTTTGGCGATCGCCGTGGAACTGAAATTAAAGCAAAAGCGGTTGCAGGTCACAGTGCTGAGTCGGGATTTTGCCCAGGCGGCCAGCCATGCGGCGGCGGGAATGTTAGCCCCCCATGCGGAACAAATCGCCCCAGGCCCCATGCTGGATCTATGTTTGGCTTCCCGCTGGCGTTACGGGGAATGGGTGGAAAAACTGGAACAGTTAACAGGCATGGAAACGGGTTATAACCCCTGTGGCATCCTCTCCCCCGTGTTTGAAGCGCCCCATGGCAATAGTTCCACTAATTCTGCCTGGTTAGACCAGGAAACCATTCGATACTATCAACCAGGGCTGGGGGAAGACGTAATTGGT…	MQTTSDVLIIGGGIIGLAIAVELKLKQKRLQVTVLSRDFAQAASHAAAGMLAPHAEQIAPGPMLDLCLASRWRYGEWVEKLEQLTGMETGYNPCGILSPVFEAPHGNSSTNSAWLDQETIRYYQPGLGEDVIGGWWHPDDGQVDNRKLVSALRQAAQSLGVQIQEGVTVQAIAQRHGQVTAVLTDQGSFQADSYVLANGSWAKELLPLPVFPVKGQMMALRMPAGTHQPYPLQRVLFGPQTYLVPRRDGRLIVGATSEQVDWQPHNTPQGIQTLLGRAIRLFPALGDWAIEDFWWGFRPGTPDEQPFLGYGPCDNLILAIGHYRNGILLAPITAALISDLILDQKVSPLIHAFSPQRFLTTTNPPVLSCRPMTAVFPSIANPSLPHAAENSEGSKDLLE…	thiamine biosynthesis protein ThiG	thiamine biosynthesis protein ThiG
NC_005231.1:6652-8619:-	NC_005231.1	HRIBO	CDS	6652	8619	-	MYO_RS17730	SGL_RS01170		1968	656		0.452895	0.869444	0.661169	0.427503	0.655079	0.541291	2483.84	3594.55	5484.36	4134.31	5484.36	4134.31	2344.58	2708.3	ATG	TAG	CAAAAACCCGAATTT	ATGAACCCAGTTAGCCACAACAACATTGTCAATTTCATCTGGGGCATTGCTGACGATGTGTTGCGTGATGTGTATGTGCGGGGCAAGTACCGTGATGTTATCCTGCCGATGACAGTGATCCGTCGTCTAGATGCAGTTCTGGAGCCGAGTAAGGAAAAGGTACTGACCATGAAGGGTTAACTGGATAGTGCGGCGATCGCCAATCAACATGCCGCCCTCTGTCAGGCTTCCGGGGAGGCTTTTTACAATGTCTCCCCCTTTACCCTGCGGGACTTGAAGAACCGTGCCAAGCAACAGCAACTAAAGGCTGATTTTGAGACCTATCTGGATGGGTTCTCCCAGAACGTTCAGGAGATCCTCGATAAGTTCAAGTTCCGTAACCAAATTCCAACATTAATT…	MNPVSHNNIVNFIWGIADDVLRDVYVRGKYRDVILPMTVIRRLDAVLEPSKEKVLTMKG	restriction endonuclease subunit S	internal stop_Derived by automated computational analysis using gene prediction method: Protein Homology.
NC_000911.1:3465779-3467743:+	NC_000911.1	HRIBO	CDS	3465779	3467743	+	slr1661			1965	655	Yes	0.644603	3.25315	1.94888	0.197047	1.29887	0.74796	12.66	49.09	19.64	15.09	19.64	15.09	3.87	19.6	ATG	TAA	TGTTCACCACCGGAG	ATGCCCAGGGCCATGTTAAGTTGCCGTTATACCCTGCAATTGGCGTTGTGCTTTTGCTTACCATTGGGGCTAGTAAATCAGGCTTTGGCCACAGGTTTGGGTACCTTTACTTCTAAGGTGCCAGTAGTAATTGAGCAAGAAGAGAAAGATTTAACCCTAGACCCAGATACCGAAGAGATAAAGGCGATCGCCGCCAAAGAATTTTTCCTTAGCCAAGGACAAGTTCCCACCCCTCCCCTACAACCACTGCCATCGGAAGACGATATTCAGGTCCCCCCTACTAGTCCTCCATTGGAACTAGGGCCAGAGTCCTCCCCTCCCAGCGCCGAAGAAGCGGTGGACACCTGTGGTTATAGACCATCTGCTCCTACCAACATAACGCCCATACCTCTGTTACAA…	MPRAMLSCRYTLQLALCFCLPLGLVNQALATGLGTFTSKVPVVIEQEEKDLTLDPDTEEIKAIAAKEFFLSQGQVPTPPLQPLPSEDDIQVPPTSPPLELGPESSPPSAEEAVDTCGYRPSAPTNITPIPLLQGSVDGTPLRVNLLGMTVFSPKELLALPALQPWQTDPPSGTAPLIIDTNLTAAEFEVLYQGIVEGITQLYINQGYITSQAIAKPIEPVKNGEFLEQPIQVVEGQVESIQVRGRGRLRPAYICDRVARGVHSPINVGQLEESLRLLQINPMLEKVQASLLPTGKVGLSNLSVTVEEAFPFSANLSFDNYSPISLGSERIGLSLDYKNLTGLGDRLSGSYYVSTTGGLDILDFNYQVPLNPTDGTLNLRFVPTWTRITQSPFDVFDITG…	hypothetical protein	hypothetical protein
NC_000911.1:2819894-2821855:-	NC_000911.1	HRIBO	CDS	2819894	2821855	-	sll0542	SGL_RS15030	acs	1962	654	Yes	0.475572	3.37994	1.92776	0.170281	1.15436	0.662322	39.91	181.3	83.92	53.64	83.92	53.64	14.29	61.92	ATG	TAA	CTTTGACGGAGAACC	ATGTCAGATACCATTGAATCCATCCTGCAGGAAGAGCGACTGTTTGATCCCCCTACAGAATTTAGTGAGCGGGCTTACGTGCGTAGTGGGCGGGAGTATGAGCAACTGTACAGCCGGGCGGCCAGCAATCCGGAGAAGTTTTGGGGTGAGCTGGCGGAGCAGGAATTACATTGGTTTAAAAAATGGGACCAGGTTTTGGATTGGCAACCTCCCTTTGCGAAATGGTTTGTGGGGGGTCAGTTAAATATTTCCCATAACTGTTTGGATCGGCACTTAACCACCTGGCGGCGCAATAAGGCGGCCATTATTTGGGAGGGGGAACCGGGAGATTCCCGGATAATTACCTATGCCCAACTCCATCGGGAAGTGTGTCAGTTTGCCAATGCCCTGAAAAGTTTA…	MSDTIESILQEERLFDPPTEFSERAYVRSGREYEQLYSRAASNPEKFWGELAEQELHWFKKWDQVLDWQPPFAKWFVGGQLNISHNCLDRHLTTWRRNKAAIIWEGEPGDSRIITYAQLHREVCQFANALKSLGVQKGDRVAIYLPMIPEAAITMLACSRIGAPHSVVFGGFSAEALRDRLVDAEAKLVITADGGFRKDKAIALKQEVDKALEHGAPSVENVIVVQRTKADVTMTAGRDHWWHELQPQQSAHCPAEPIDSEDMLFILYTSGSTGKPKGVVHTTGGYNLYTHMTTKWIFDLKDTDVYWCTADVGWITGHSYIVYGPLSNGATTVMYEGVPRPSNPGCFWDVIERYGVNIFYTAPTAIRAFIRMGEAVPNARDLSSLRLLGTVGEPINPEA…	acetyl-coenzyme A synthetase	acetyl-coenzyme A synthetase
NC_000911.1:1504818-1506770:-	NC_000911.1	HRIBO	CDS	1504818	1506770	-	sll0254	SGL_RS08895		1953	651	Yes	0.287346	2.96786	1.62761	0.207088	2.37127	1.28918	19.62	78.5	68.28	26.45	68.28	26.45	14.14	62.72	ATG	TAG	CCGTCTGCCTTTTGC	ATGACTGAATTACCCCCCAATCCTAATTCCACCGTTGTTTCCCGTCGTACTGCGCTCAAGCTTTTAGGGGTGGGTACCCTGGGGGGCGCCATTGGTTATTCCCGTTTAGCTAAGCCCCAGCCGGCCCGGTACGATACTGATCGCCTAGATTTGCCGCAATATTTGTCCCAACTAAAGTCGGTGGTGGTGGTGGGAGCTGGTTTAGCTGGTTTAGCTTCAGCCTATGAACTGAGCAAGCGGGGCTTTAAGGTTACCCTTTTGGAAAAATCGCCAAATTTAGGGGGCAAGGTGGCGGGCTGGCCCATCCAGGTGGGGGAAGAAACTTTCCAGATGGAGCACGGTTTCCACGGCTTTTTCCCCCAGTATTACAACCTCAAAAGCATTGTTAATGAATTGGCG…	MTELPPNPNSTVVSRRTALKLLGVGTLGGAIGYSRLAKPQPARYDTDRLDLPQYLSQLKSVVVVGAGLAGLASAYELSKRGFKVTLLEKSPNLGGKVAGWPIQVGEETFQMEHGFHGFFPQYYNLKSIVNELAIADNFRSLDFYSLVFKEGYEPEVFRPSHSAFPWNIVDLTISSPNRLRWGINLTKPAHWQVFRAITGFQIPKSYDQLDSITVSDWVAKGFPKGLYDLYFLPFAKSSLNAPDVLSAGELMQFFHFYFFGNPEGLAFNGTKDDMVTSLVMPMVESIKAHGGQIITEATVSAINCDQGLIQSLQYVQGDDPVSDVPFTVPRNDLLTQANPGGNVYYGAGDRVYWAKPEGKEALSLTCSHQGCTVAKQENGQFICPCHGAVYDADGQVIQG…	probable phytoene dehydrogenase Rieske iron-sul fur component	probable phytoene dehydrogenase Rieske iron-sulfur component
NC_000911.1:1904025-1905977:-	NC_000911.1	HRIBO	CDS	1904025	1905977	-	sll1434	SGL_RS10870	mrcA	1953	651	Yes	0.386316	2.24335	1.31483	0.312482	1.65283	0.982659	68.49	147.59	177.29	65.79	177.29	65.79	55.4	108.74	GTG	TAG	GGAAGTTCTTACACC	GTGTCATCCACTAGCACCCTAAAACCGTCTTCCACCAAGGTCAAAGCCAAAGCCCAGCCTAATTTTTTCCAGCGGGTATTGTGCACCACCGGCACCACTTTTCTGGGGGTGGGTCTAGTTTCTACCGCTGTGGTGGCAGGAGGGGTGGCTGGCTTGGCCTTTAGTTTTCGTAATCTACCCGATGTGCGGGGTCTAACTTCCTACGTGCCCGCCCAAACCAGTTATATCTACGATGCCAAAGGACGGGAATTGCTCAGCCTCCACGGGGAAGAACATCGCAAAATTGTGCCCCTGGCGGAAATTTCTCCCAACCTAAAACGTGCCGTACTGGCGATCGAAGACAGCAATTTTTATAAACACCAAGGCATCAACCCCAACAGCATTGGGCGGGCCCTGTTA…	VSSTSTLKPSSTKVKAKAQPNFFQRVLCTTGTTFLGVGLVSTAVVAGGVAGLAFSFRNLPDVRGLTSYVPAQTSYIYDAKGRELLSLHGEEHRKIVPLAEISPNLKRAVLAIEDSNFYKHQGINPNSIGRALLVNFKSGGVSEGASTLSMQLVKNIYLSQKRVFTRKLAEAVLAIRVEQVFDKDQILDMYLNYIYWGHNNYGIQTAAESYFKKSAADLDLAESAMLAGMIQAPEAYSPFNNFTAAKERQEVVLDRMVSIGWITPAEAEAAKKEPLQNKLGQPTAWQNSKLPYVTDAVIAELETRFGKEALAQGGLRVQSTVDYDTQKLAEKTVKSAYSGLRGRMGRAKDLQIALVAVEPETHFIKAMAGGVDYNKSQLNRVTISRRQPGSAFKPFVYYS…	penicillin-binding protein	penicillin-binding protein
NC_000911.1:1332429-1334378:+	NC_000911.1	HRIBO	CDS	1332429	1334378	+	slr1744	SGL_RS08120	amiA	1950	650	Yes	0.532462	4.32965	2.43105	0.20767	1.68755	0.94761	61.51	211.46	115.52	48.84	115.52	48.84	23.99	82.42	ATG	TAG	AGTTGAGAAGTCCCT	ATGTCAAGATTGCCTGGTTTTGCTCTTACCTTTCTGTCGGTCTTGTTAACCAGTCTGCCAGCCATGGCGGGGCAGTTAGTTAACTGGAATTTCAATGCGTCCCAGAATCGGCTGACTTTCTACACCGATTCCCGGGTTCAGCCCACAGCCCAACTGATCCCCAATCCCACCCGCATTGTGGTGGATTTGCCCGGTACAACCTTGAGGGGCCCCACCGTCAGGCAAGCTGGAGGGGGAAGGGTAAGGGAAATTCGCATCGGTGAACCGGATAGTTTTACCACCAGGGTGGTGATTGAACTGGATGCGGGCTACACCGTTGATCCCCAACAGGTTAAAGTCCGGGGCATTACCCCGACTCAATGGGTGGTGGAATTACCTACCCCAGAATTGGCTCCCGCC…	MSRLPGFALTFLSVLLTSLPAMAGQLVNWNFNASQNRLTFYTDSRVQPTAQLIPNPTRIVVDLPGTTLRGPTVRQAGGGRVREIRIGEPDSFTTRVVIELDAGYTVDPQQVKVRGITPTQWVVELPTPELAPASNNNAPGPNPDGSSLPTQNLSAANPPSTGQQYLQVTGNGLFVRLDKNGDNSGIRIQPNARQSTVNFELNGAVLPESLVGQSLPVGQYGVEEIKFSDNPNNPRLSLALADSGGGWNAYYSRVGGGVVLLPKQISRSGGANPAPGSAAVPVSNNTSNSSPSSSGNRSPNDRLVSQASNRNLANITAIEVTRDDSQLIIRGDRQINARGNFNRLTGNYEIRLDRAQLSPQFQSPELATGGPLYQLNISQETNDSVLILVRPNTGRRFGR…	N-acetylmuramoyl-L-alanine amidase, periplasmic protein	N-acetylmuramoyl-L-alanine amidase, periplasmic pr otein
NC_000911.1:1550952-1552895:+	NC_000911.1	HRIBO	CDS	1550952	1552895	+	slr2089	SGL_RS09110	shc	1944	648	Yes	0.33055	2.48137	1.40596	0.229891	2.14141	1.18565	35.63	119.85	107.79	48.3	107.79	48.3	24.78	103.43	ATG	TAA	TTTACAACTTTGTCC	ATGGTTATTGCCGCCTCTCCCTCCGTTCCTTGTCCTAGCACCGAGCAGGTGCGCCAGGCGATCGCCGCTAGTCGGGACTTCCTGCTATCGGAACAATATGCCGATGGCTACTGGTGGTCTGAGTTGGAATCCAATGTCACCATCACTGCCGAAGTGGTCATACTGCACAAAATTTGGGGCACAGCGGCCCAAAGACCCCTGGAGAAGGCGAAGAATTACCTGTTGCAACAACAACGGGACCATGGCGGTTGGGAACTGTACTATGGTGATGGCGGTGAACTAAGTACCAGTGTGGAAGCCTACACTGCCCTGCGAATTTTGGGGGTTCCAGCCACCGATCCTGCCTTGGTCAAAGCGAAAAATTTCATTGTCGGCCGGGGGGGCATTAGCAAATCCCGC…	MVIAASPSVPCPSTEQVRQAIAASRDFLLSEQYADGYWWSELESNVTITAEVVILHKIWGTAAQRPLEKAKNYLLQQQRDHGGWELYYGDGGELSTSVEAYTALRILGVPATDPALVKAKNFIVGRGGISKSRIFTKMHLALIGCYDWRGTPSIPPWVMLLPNNFFFNIYEMSSWARSSTVPLMIVCDQKPVYDIAQGLRVDELYAEGMENVQYKLPESGTIWDIFIGLDSLFKLQEQAKVVPFREQGLALAEKWILERQEVSGDWGGIIPAMLNSLLALKVLGYDVNDLYVQRGLAAIDNFAVETEDSYAIQACVSPVWDTAWVVRALAEADLGKDHPALVKAGQWLLDKQILTYGDWQIKNPHGEPGAWAFEFDNNFYPDIDDTCVVMMALQGITLP…	squalene-hopene-cyclase	squalene-hopene-cyclase
NC_000911.1:2300515-2302446:+	NC_000911.1	HRIBO	CDS	2300515	2302446	+	slr0168	SGL_RS12680		1932	644	Yes	0.557984	3.02693	1.79246	0.116636	0.63545	0.376043	33.44	75.31	59.93	24.88	59.93	24.88	6.99	15.81	ATG	TAG	CTGTTGAATTAATCT	ATGACTATTCAATACACCCCCCTAGCCGATCGCCTGTTGGCCTACCTCGCCGCCGATCGCCTAAATCTCAGCGCCAAGAGTAGTTCCCTCAACACCAGTATTCTGCTCAGCAGTGACCTATTCAATCAGGAAGGGGGAATTGTAACAGCCAACTATGGCTTTGATGGTTATATGGGAATTCCCGGTATGGATGGCACCGATGCGGAATCCCAACAGATTGCCTTTGACAACAATGTGGCCTGGAATAACCTGGGGGATTTGTCCACCACCACCCAACGGGCCTACACTTCGGCTATTAGCACAGACACAGTGCAGAGTGTTTATGGCGTTAATCTGGAAAAAAACGATAACATTCCCATTGTTTTTGCGTGGCCCATTTTTCCCACCACCCTTAATCCC…	MTIQYTPLADRLLAYLAADRLNLSAKSSSLNTSILLSSDLFNQEGGIVTANYGFDGYMGIPGMDGTDAESQQIAFDNNVAWNNLGDLSTTTQRAYTSAISTDTVQSVYGVNLEKNDNIPIVFAWPIFPTTLNPTDFQVMLNTGEIVTPVIASLIPNSEYNERQTVVITGNFGNRLTPGTEGAIYPVSVGTVLDSTPLEMVGPNGPVSAVGITIDSLNPYVAGNGPKIVAAKLDRFSDLGEGAPLWLATNQNNSGGDLYGDQAQFRLRIYTSAGFSPDGIASLLPTEFERYFQLQAEDITGRTVILTQTGVDYEIPGFGLVQVLGLADLAGVQDSYDLTYIEDHDNYYDIILKGDEAAVRQIKRVALPSEGDYSAVYNPGGPGNDPENGPPGPFTVSSSP…	unknown protein	unknown protein
NC_000911.1:3058411-3060339:+	NC_000911.1	HRIBO	CDS	3058411	3060339	+	slr0797	SGL_RS16085	coaT	1929	643	Yes	0.35568	1.65616	1.00592	0.155493	1.87966	1.01757	7.64	5.78	21.48	3.49	21.48	3.49	3.34	6.56	ATG	TAA	TCCAAGTTAAAAAGC	ATGGTTGTAACTCCCCCTTCTTCTGCCTTTCGATTTTCTAACCTTTTCAAAGATCATCCCGATGCAGTGGCGGCGATCGCCTGTGGCGGGCTGGTCTTTCTGGGCTGGCAGATGCTTAACTTGGGCTGGTTGGGAATTGCCTTTTTTGTCCTAACAGCGGCCTATGTGATTGGTGGATTTGACAATGCCCGTGAGGGATTAACAACCCTCTTTGAAGAAAAAGAATTTGATGTCGATCTGCTGATGATTGTGGCCGCCTTGGGGGCCGCCGGGTTGGGACTTTGGCGACGGGAATATACCCTCATTGTGGATGGGGCAGTTCTGATTCTTATTTTTGCCATCAGTGGGGCATTGGAAGGATACGCGATGCAACGGACGGAGCGGAGTATCCAGGGATTG…	MVVTPPSSAFRFSNLFKDHPDAVAAIACGGLVFLGWQMLNLGWLGIAFFVLTAAYVIGGFDNAREGLTTLFEEKEFDVDLLMIVAALGAAGLGLWRREYTLIVDGAVLILIFAISGALEGYAMQRTERSIQGLMSLTADVARVLRNGQEQTIPISELKMGDQVLVKPGELVPTDGLVIEGFSTLNQASITGESMPVEKAIGDEVFAGTINGNGVLRLKIHQPPESSLIQRVIRLVQQAQTEAPPSQQFIERFECGYAKVIVIAGLLLGTLPPFLLGWSWEETIYRALIFLVVASPCALMASIMPALLSGIANGARQGILFKNGAQLERIGRVRVIAFDKTGTLTTGKPEVVNILATQPSTDKLLQIAAALESLSEHPIGEAIADFTRQQNQAWATARNV…	cobalt-transporting P-type ATPase (cobalt efflu x pump) involved in cobalt tolerance	cobalt-transporting P-type ATPase (cobalt efflux p ump) involved in cobalt tolerance
NC_000911.1:696044-697972:+	NC_000911.1	HRIBO	CDS	696044	697972	+	slr1390		ftsH	1929	643	Yes	0.541059	2.4367	1.48888	0.370748	1.74351	1.05713	66.81	140.89	123.48	57.82	123.48	57.82	45.78	100.81	ATG	TAG	TGGCACCGTTTGGGG	ATGGGTTTACTGGTAGCTGGCACCCTAGCCCTACCGGTATCTACCCTGGCCCAGGAAGGGGGAGAAGGGGCCCAACCCAAGGCCAGTCCCAGTCCCATCCAATCCCCTAACTCCAGCAATGGAGAAGCCACACCCCGCTCCTTTTTTAACTCTGGCTCCCCCCGGTCTGCTGAACCGAAAATGAACTATGGGCAGTTGATCGATGCCATTAAAGCTAATCAAGTGGCCAAAGTGGAAGTGGACACTAACCGCCGCCAGGCGATCGTTACCCTCAAGGATGCTCCCCCAGGGTCCAAGCCCCAAACCGTGCAGTTACTAGACAATAATCCAGAGTTGCTCAACCTCCTGCGGAGCCGTTCCGAAACCATCGATTTAGACATCAACCGCACCCCGGATAAT…	MGLLVAGTLALPVSTLAQEGGEGAQPKASPSPIQSPNSSNGEATPRSFFNSGSPRSAEPKMNYGQLIDAIKANQVAKVEVDTNRRQAIVTLKDAPPGSKPQTVQLLDNNPELLNLLRSRSETIDLDINRTPDNSALYGLLTNLLVVAILIGLVVMVVRRSANASGQAMSFGKSKARFQMEAKTGVGFDDVAGIDEAKEELQEVVTFLKQPEKFTAIGAKIPRGVLLIGPPGTGKTLLAKAIAGEAGVPFFSISGSEFVEMFVGVGASRVRDLFKKAKENAPCLVFIDEIDAVGRQRGVGYGGGNDEREQTLNQLLTEMDGFEGNSGIIVIAATNRPDVLDLALLRPGRFDRQVTVDYPDVQGRELILAIHAQNKKLHEEVQLAAIARRTPGFTGADLAN…	cell division protein FtsH	cell division protein FtsH
NC_000911.1:3250985-3252907:+	NC_000911.1	HRIBO	CDS	3250985	3252907	+	slr0551	SGL_RS16930		1923	641	Yes	1.01388	9.74883	5.38136	0.288743	4.04412	2.16643	145.37	647.42	143.38	66.41	143.38	66.41	41.4	268.57	ATG	TAA	TTTTTTATTTACACT	ATGGCTAAAAATACTCAAACCCAAGCCCTCAAAATTCTTCCCCTCGGTGGCCTGCACGAAATTGGTAAAAATACCTGCGTCTTTGAATATGACGATGAAATTTTACTGCTTGATGCGGGGCTAGCTTTCCCCACCGACGACATGCACGGCGTTAATGTTGTACTGCCGGACATGACCTACCTGAGGGAAAACCGGGAGAAAATCAAGGGCATGGTGGTTACCCACGGCCACGAAGACCACATTGGTGGCATTGCCTATCACCTCAAGCAGTTTGACATTCCCATTATCTACGGCCCTCGGTTAGCCATGGCCCTGTTACGGGACAAGCTGGAGGAAGCCGGTATGTTGGAGCGCACCAATTTGCAGACCGTCTCTCCCCGGGAAATGGTGCGTTTGGGC…	MAKNTQTQALKILPLGGLHEIGKNTCVFEYDDEILLLDAGLAFPTDDMHGVNVVLPDMTYLRENREKIKGMVVTHGHEDHIGGIAYHLKQFDIPIIYGPRLAMALLRDKLEEAGMLERTNLQTVSPREMVRLGKSFVVEFIRNTHSIADSYCLAIHTPLGVVMHSGDFKIDHTPIDGEFFDLQKVAEYGEKGVLCLLSDSTNAEVPGITPSEASVIPNLDRVFSQAEGRLMVTTFASSVHRVNIILSLAQKHQRKVAVVGRSMLNVIAHARKLGYIKCPDNLFVPLKAARNLPDQQQLILTTGSQGEPLAAMTRISNGEHPQIKIRQGDTVVFSANPIPGNTIAVVNTIDRLMMQGANVIYGKHQGIHVSGHASQEEHKMLLALTRPKFFVPVHGEHRM…	hypothetical protein	hypothetical protein
NC_000911.1:566983-568905:-	NC_000911.1	HRIBO	CDS	566983	568905	-	sll1945	SGL_RS04515	dxs	1923	641	Yes	0.214187	1.55049	0.882339	0.18386	0.777984	0.480922	95.84	376.63	447.46	242.91	447.46	242.91	82.27	188.98	ATG	TAG	TAGTCCCAATCCACC	ATGCACATCAGCGAACTGACCCACCCCAATGAGTTAAAGGGTTTATCTATCCGTGAGCTGGAGGAAGTTTCCCGGCAAATCCGAGAAAAACATCTCCAAACTGTGGCCACCAGCGGCGGTCATCTGGGGCCTGGGTTGGGAGTGGTGGAACTGACGGTGGCCCTATATTCCACTCTTGATTTAGACAAAGACCGGGTGATTTGGGATGTGGGACACCAAGCCTATCCCCACAAAATGTTGACGGGACGTTACCATGATTTCCATACCCTGCGGCAAAAAGATGGGGTGGCTGGTTACCTCAAACGCTCTGAAAGTCGTTTTGACCATTTTGGTGCTGGGCACGCTTCCACAAGTATTTCCGCTGGTTTGGGCATGGCTTTAGCTCGAGATGCCAAGGGG…	MHISELTHPNELKGLSIRELEEVSRQIREKHLQTVATSGGHLGPGLGVVELTVALYSTLDLDKDRVIWDVGHQAYPHKMLTGRYHDFHTLRQKDGVAGYLKRSESRFDHFGAGHASTSISAGLGMALARDAKGEDFKVVSIIGDGALTGGMALEAINHAGHLPHTRLMVILNDNEMSISPNVGAISRYLNKVRLSSPMQFLTDNLEEQIKHLPFVGDSLTPEMERVKEGMKRLVVPKVGAVIEELGFKYFGPIDGHSLQELIDTFKQAEKVPGPVFVHVSTTKGKGYDLAEKDQVGYHAQSPFNLSTGKAYPSSKPKPPSYSKVFAHTLTTLAKENPNIVGITAAMATGTGLDKLQAKLPKQYVDVGIAEQHAVTLAAGMACEGIRPVVAIYSTFLQRG…	1-deoxyxylulose-5-phosphate synthase	1-deoxyxylulose-5-phosphate synthase
NC_005230.1:26352-27608:-	NC_005230.1	HRIBO	CDS	26352	27608	-	sll7028	SGL_RS00745		1257	419	Yes	0.941815	1.92341	1.43261	2.2278	5.20223	3.71502	3084.67	4209.91	3275.24	2188.77	3275.24	2188.77	7296.59	11386.5	ATG	TAA	GGAGTTGCTAGCGAT	ATGAGCGATGATTGCCAAGCTCTGCTCAGTGCTACCCGATTGCGGCTACGGATGCAGTCTCCCTTTTTTGCTACCCTCGCTCTGTTTGCCCGTTATTACGTCACTGAAGCAATACCTACCGCTGGTACAGAGGGTAAAAATATCTATTTCAATCCCCATTATCTTGCCCAGCTTACCCCCGCCGAAAGGGACGGGCTATTTCTCCATGAGTTGTTGCACGGAGCATTGTTACACCAAAGCCGTCGGGCCAGTCGTCTGCCGGAGTTGTGGAATATAGCGGCGGATATTGTGGTTAATGGCATGATTGTGGCGGAGGGAAAATTTGTTATTCCCAAGGGGGGTTTACGGGAACCGGAATTAGAAAAATATAGTGTGGAGGAGGTCTATGAGTTACTGATT…	MSDDCQALLSATRLRLRMQSPFFATLALFARYYVTEAIPTAGTEGKNIYFNPHYLAQLTPAERDGLFLHELLHGALLHQSRRASRLPELWNIAADIVVNGMIVAEGKFVIPKGGLREPELEKYSVEEVYELLIKRESPPALPIADLLQEIPNLTTQSDSNNNDNDLNSNDSEPNGGQSSANSSKIHSHSQDDQEIHRNRLESPRHQEEQLAVHWRNAIQQATVVARSQFQGNLPEGLERHLGEIGQPQLDWRTYLWRFLVHTPNDFQGYDRRFIHQGLYLEALVGESVEVFCCIDTSGSVGDEEMGIFLSELRGIFGSYPQIKCWLWYADADCYGPYELDNLNAVPKPQGGGGTDFRPFFTAVDEKWSREKQAVICYLTDGYGSFPDQAPPLDTLWVVS…		ORF_ID:sll7028_hypothetical protein
NC_000911.1:276429-278342:+	NC_000911.1	HRIBO	CDS	276429	278342	+	slr1799	SGL_RS03170		1914	638	Yes	0.244312	2.77647	1.51039	0.207859	2.09331	1.15058	18.9	68.44	77.36	24.65	77.36	24.65	16.08	51.6	ATG	TAA	CCCCTGTAATTGCAG	ATGAATAAGACCTTTAACCTCCCTATTGCCCGCTATTTCCAGTCTGGTCTGCCACTGCAACGGTTGCCCCTTCAGTTTTGGGCGATTTTTCTGATTTTGATGTCGGGGGGAATCGGTCTGGCTTCCACCAATTGGTTGTTGGTTTTGCCCAAAAGTCCCCAATGTAACCGGGTGTTTTGGCCGGTGGCTTCGGCGTCCATGCGGCTTTACTGTGCCCAGTTATCGGCGGAAGAAAAAACCGTTGATGGGCTGTTGCGGGCCATTAATCTTTTGGCAGCCTTGCCCAAGGATCATCCCCTGGCGGTGGAGGTGAACCGTAATATTGAAGCCTGGGCCACGGATTTATTGGATTTGGCCGAGGATTTTTTCCAAAAAGGACTACTGGAAGAGGCGATCGCC…	MNKTFNLPIARYFQSGLPLQRLPLQFWAIFLILMSGGIGLASTNWLLVLPKSPQCNRVFWPVASASMRLYCAQLSAEEKTVDGLLRAINLLAALPKDHPLAVEVNRNIEAWATDLLDLAEDFFQKGLLEEAIAAAEKIPDHVQAYDLVEERIAAWRGLWQEGETIYGEVENDLRNSRWNSAFRNAVRLLNLDNTFWATTKYDQAIRNIQIAQEESSKLDNAYRILRRGGTDNWLKAIEDAAKIPKDSYAYQEAQKLIAQAVDKLTGSIETMIEGQDWQTLNSTLSRLPESYFPAQDLNDWQILATAGLEAQMGTVEGLGLAITTAEKLTDSSRPYYALAQELVKDWRQEETALQQLAQARNTAEIGTVSALNQAIAQAKLITPDNPRHQEAARDIANWT…	hypothetical protein	hypothetical protein
NC_000911.1:2829098-2831011:+	NC_000911.1	HRIBO	CDS	2829098	2831011	+	slr0825	SGL_RS15075		1914	638	Yes	0.247072	2.20074	1.2239	0.12004	1.24579	0.682913	27.21	71.81	110.13	32.63	110.13	32.63	13.22	40.65	GTG	TGA	AGTTTCCCCTCTCCT	GTGATTTCCATGACCACTAAACAGATTGCCCCCTATGGTTCCTGGCGATCGCCAATTACGGCCGATGCGTTGTTGGCGGGGAGTATTGGTTTGGGGGCAGTGCAAAACAGCGGTGAAGATGTCTTTTGGCTAGAAGCGAGGCCGGCAGAAAAAGGGCGTAATGTTCTAGTTCACCGGCAACCCGATGGCACTGTGCGGGATGTCACTCCGGCCCCTTTCAATGTCCGCACCAGGGTACACGAATATGGTGGCGGAGCCTTTTTGGTCACGGCGGATGGGGTTTATTTCAGTAATTTCAGCGATCAACAGGTTTACGTCCAAGGCGTTGGGCAAGAACCGCAACGATTGACCAACAGACCAGACTGTCGTTTTGCTGATTTTGTTTTGGATCAACCCAGA…	VISMTTKQIAPYGSWRSPITADALLAGSIGLGAVQNSGEDVFWLEARPAEKGRNVLVHRQPDGTVRDVTPAPFNVRTRVHEYGGGAFLVTADGVYFSNFSDQQVYVQGVGQEPQRLTNRPDCRFADFVLDQPRQRLIAVGERHHSEAKEPENFLAAISLENGEVTTIATVHDFYSSPRLSPDGQKLAWITWDHPHMPWDATQLWLADIDQAGNLSNLKIIAGQAGNESIHEPQWSPDGSLYFVGDRTDWWNLYRYHKGEVDNVFPLDAEFAYPHWVFGLRSYTFVDTDTILCTFTQDGAWQLGKLKPSRKQLSILGLPYSNYSSLCSDGKTLWFIGSGPTTSSAVVALAVEAQETEILKVASDFTLDPAYLAQPQAISFSGDDGQTAHAWYYPPTNGDF…	probable peptidase	probable peptidase
NC_005231.1:1-1914:+	NC_005231.1	HRIBO	CDS	1	1914	+	MYO_RS18510			1914	638		1.41272	0.96905	1.19089	1.69293	0.761219	1.22708	4510.11	2292.87	3192.5	2366.1	3192.5	2366.1	5404.69	1801.12	GAT	CAT		GATCTGACTACTAGGGAAGCCGTTGAGGGTGGCTTCTGTGACCTTCTGCCCTCCGTAGTCATACTCTCCAGAAAAGGCGACGATCGCCTGGTAGGGGCTTTTCCGTTCCCGCAGGTAGTCTTTGAAGGCGTAGAAGTACTGGATAGCTTGCCCAATACCGTTGGTGATGACCATCGCCCGAGCCTGCCCACCAATCTTGCCGTGGTTGATTACTTGGGTGTGGAAGTGGTCCACCATGATCTCGGTCTTCTCCCGGATGGCATGTTGGTGGGATTCCACATAGCGGCGCAGTTTCTTTTGGGCTTTCTTAGCATCGAAGAGGGGGTCATCCTCCACCGTCTTGGCTAGGCGGTAATAGCTCTCCACGGGGGTGTAACTTTTCAGCACATCGAGGATAAA…	DLTTREAVEGGFCDLLPSVVILSRKGDDRLVGAFPFPQVVFEGVEVLDSLPNTVGDDHRPSLPTNLAVVDYLGVEVVHHDLGLLPDGMLVGFHIAAQFLLGFLSIEEGVILHRLG	type I restriction endonuclease subunit R	Derived by automated computational analysis using gene prediction method: Protein Homology.
NC_000911.1:2014908-2016818:-	NC_000911.1	HRIBO	CDS	2014908	2016818	-	sll0912	SGL_RS11385		1911	637	Yes	0.416689	3.01253	1.71461	0.109911	0.593668	0.351789	15.43	45.67	37.03	15.16	37.03	15.16	4.07	9	ATG	TGA	GGTAAATTTCCCCGT	ATGGCTCTCATCACTGTTCAATCCCTCCGCAAAGATTTTGGTATTAAAGAAATTCTGCGGGACGCTACGTTCAACATCGAGCCAGGCGATCGGGTGGGATTAATTGGGGTTAATGGCTCCGGTAAATCCACCCTGTTGAAAATGATTGCCGGGTTAGAACCCTTTGATGGCGGAGAATATTGGTGCAACAGCAGTGCCAAAGTGGTTTATTTACCCCAACAACCAGAGATGGACGGCGATCGCACCGTGTTGGAGCAGGTTTTTGTGGACAGTGGCGAACAGTGGCAATTAGTTAAACAATACGAACTGCTGTCGGACAAGTTGGCCCACCAGGGCAGTGACGAGCAATTGCTTAATCAACTGTCGGCCCTATCAGCCCAGATGGAAACCAGTGGGGCC…	MALITVQSLRKDFGIKEILRDATFNIEPGDRVGLIGVNGSGKSTLLKMIAGLEPFDGGEYWCNSSAKVVYLPQQPEMDGDRTVLEQVFVDSGEQWQLVKQYELLSDKLAHQGSDEQLLNQLSALSAQMETSGAWELETQAKIILTQLGVDHLDAKVGDLSGGYRKRVAIAAALLSQPDVLLMDEPTNHLDAFSVEWLQSYLQRFRGALLLITHDRYFLDRVTNRILEIDQGELYSYNGNYGYYLTKKAEAEESEQSSQKKHRGVLRRELEWLKRGPKARSTKQKARIDRIQDMQETSFKTGTGKVDISTAGRRIGKKVVELENISKGFENKQLIKDFSYIFTPGDRVGIVGKNGVGKSTLMNMITGRLEPDQGTVDIGSTIHFGYFDQHSDDLSLNPNQ…	ABC transporter ATP binding protein	ABC transporter ATP binding protein
NC_000911.1:2312664-2314574:-	NC_000911.1	HRIBO	CDS	2312664	2314574	-	sll0170	SGL_RS12750	dnaK2	1911	637	Yes	0.982485	8.1427	4.56259	0.159093	1.672	0.915545	302.91	1059.04	308.31	130.06	308.31	130.06	49.05	217.46	ATG	TAG	GAGTTAATTAAAATT	ATGGGAAAAGTTGTTGGGATTGACCTCGGTACTACCAATTCCTGTGTGGCTGTAATGGAAGGGGGTAAACCCACTGTTATCGCCAATGCAGAAGGTTTTCGCACGACCCCATCGGTGGTTGGTTATGCCAAAAATGGCGATCGCCTAGTGGGGCAAATTGCCAAGCGTCAAGCGGTGATGAACCCGGGCAATACTTTTTATTCTGTCAAACGATTCATTGGTCGTAAATTTGATGAAATTACCAATGAAGCCACCGAAGTTGCCTACAGCGTAGTTAAAGACGGCAACGGCAATGTGAAACTAGATTGCCCAGCCCAAGGAAAACAGTTTGCCCCGGAAGAAATTTCTGCCCAAGTGCTGCGGAAATTGGTGGACGATGCCAGCAAGTACCTAGGGGAG…	MGKVVGIDLGTTNSCVAVMEGGKPTVIANAEGFRTTPSVVGYAKNGDRLVGQIAKRQAVMNPGNTFYSVKRFIGRKFDEITNEATEVAYSVVKDGNGNVKLDCPAQGKQFAPEEISAQVLRKLVDDASKYLGETVTQAVITVPAYFNDSQRQATKDAGKIAGIEVLRIINEPTAASLAYGLDKKDNETILVFDLGGGTFDVSILEVGEGVFEVLATSGDTHLGGDDFDKKIVDFLAGEFQKAEGIDLRKDKQALQRLTEAAEKAKIELSGVSQTEINLPFITATQDGPKHLDTTLSRAKFEEICSDLIDRCGIPVENAIRDAKIDKSALDEIVLVGGSTRIPAVQEVVKKILGKDPNQGVNPDEVVAVGAAIQGGVLSGEVKDILLLDVSPLSLGVETL…	DnaK protein 2, heat shock protein 70, molecula r chaperone	DnaK protein 2, heat shock protein 70, molecular c haperone
NC_000911.1:1816855-1818762:-	NC_000911.1	HRIBO	CDS	1816855	1818762	-	sll1868	SGL_RS10435	dnaG	1908	636	Yes	0.314522	1.9837	1.14911	0.218209	4.10326	2.16074	4.18	14.6	13.29	7.36	13.29	7.36	2.9	30.2	ATG	TAA	GTAGGTTGATTTATC	ATGGATAACCTCCGTCTGCATCCAGACACCATCCAAGAAATTAAGCAAAGAATAGACATTGTCGAAATTATCGGCGATTATGTCGTGCTCAAGAAAAGGGGGCGGGATCACCTTGGCCTATGTCCTTTCCACGATGAAAAGTCACCGAGTTTTAGTGTCAGTCCAGCCAAGCAAATGTATTATTGCTTTGGTTGTGGGGCTGGGGGCAATGCCTTTAATTTTTTAATGGAACTGGGTAAGCGTTCCTTTACAGATGTGGCTTTAGATTTAGCCCGTCGCTATCAAATCCAAATTCAAACCCTAGAGCCGGCGCAAAAACAGGAGTTACAACGGCAACTATCTCTGCGGGAACAGCTCTATGAAATTATGGCTGTGGCTGCCGGTTTTTATCACCATACT…	MDNLRLHPDTIQEIKQRIDIVEIIGDYVVLKKRGRDHLGLCPFHDEKSPSFSVSPAKQMYYCFGCGAGGNAFNFLMELGKRSFTDVALDLARRYQIQIQTLEPAQKQELQRQLSLREQLYEIMAVAAGFYHHTLFQPQGQEALTYLDQKRCLSSATIQEFQLGYAPAGWETLYRYLVEQKRYPVAAVEQAGLIKARQSGTGYYDQFRHRLMIPIRDVQGKTIAFGSRTLGNDEPKYLNSPETPLFHKSKTLFGLDQAKTAIQKVDEAILVEGYFDVIALHESGIKQTVAALGIALSRDQVQSLMRFSQSKQIIFNFDADKAGINATQRAIQEIEPLVYSGQVNLRILNLPAGKDADEFIHSSAENKEIYQTLVKQAPLWVDWQIQQLLKQKNLKDPLDF…	DNA primase	DNA primase
NC_000911.1:2521830-2523737:-	NC_000911.1	HRIBO	CDS	2521830	2523737	-	sll0202	SGL_RS13590	gidA	1908	636	Yes	0.424558	4.39453	2.40954	0.37414	2.7395	1.55682	22.82	93.12	53.75	21.19	53.75	21.19	20.11	58.05	ATG	TGA	TTTTAGTGCGCCGCC	ATGACCCTTCGATCGCCAGTGGAATTCCAAGACCAATTTGATGTCATCGTGGTGGGGGCAGGCCATGCGGGTTGTGAGGCGGCCTTGGCCACGGCTCGGTTGGGCTGTCGCACCCTACTGTTAACCCTCAACTTAGACCGCATTGCTTGGCAACCCTGTAACCCTGCAGTGGGAGGGCCGGCTAAATCCCAGTTAACCCATGAAGTGGATGCACTGGGGGGGGAAATTGGCAAAATGGCCGACCGTACCTATCTGCAAAAGCGGGTGTTAAATATTTCCCGGGGGCCGGCGGTGTGGGCATTGCGGGCCCAAACGGATAAGCGGGAATATGCGGCGGTGATGAAAAATATCGTTGAAAATCAACCTAATCTATCCATTCGGGAAGGGATGGTGACGGAT…	MTLRSPVEFQDQFDVIVVGAGHAGCEAALATARLGCRTLLLTLNLDRIAWQPCNPAVGGPAKSQLTHEVDALGGEIGKMADRTYLQKRVLNISRGPAVWALRAQTDKREYAAVMKNIVENQPNLSIREGMVTDLVLGDNDEIQGVQTYFGACFGAQSVVITTGTFLGGKIWIGNKSMPAGRAGEFAAVGLTETLNELGFETGRLKTGTPARVDRRSVDYDKLEPQPPDEQVSWFSFDPEVWVEREQMNCYLTRTTAKTHQLIKDNLHLSPIYGGFIDSKGPRYCPSIEDKIVRFADKESHQIFIEPEGRDIPELYIQGFSTGLPENVQLAMLQTLPGLENCVMLRPAYAVEYDFLPATQCYPSLMTKKVAGLFCAGQINGTTGYEEAAAQGLVAGINAA…	glucose inhibited division protein	glucose inhibited division protein
NC_000911.1:321699-323606:+	NC_000911.1	HRIBO	CDS	321699	323606	+	slr0963	SGL_RS03380	sir	1908	636	Yes	0.948585	5.35091	3.14975	0.703511	2.28156	1.49253	52.95	206.01	55.82	38.5	55.82	38.5	39.27	87.84	ATG	TAA	ACATAGAGAGAGTTA	ATGGTAACCACCCCCACCGCTGCCCCCCGTAAACCGTCCAAGGTAGAAGGCATCAAGGAAAGAAGCAATTATTTACGGGAACCCCTGGCCACCGAACTGTTGAATGATGCTAACTATTTTACGGACGATGCCGTCCAAATTCTGAAATTCCACGGTTCCTACCAACAGGACAATCGGGACAATCGGGTTAAGGGGCAAGAAAAGGATTATCAGTTTATGCTCCGCACCCGCAATCCGGGGGGATTGATTCCGGCCCAACTCTACACCGCCCTAGATGATCTGTCCAAAACCCACGGTAACCAAACTCTCCGGGTGACCACCAGACAAGGTTTGCAAATCCACGGCATTGTCAAAAAAGACCTGAAAATGGCGATCGCCACGGTGGTGAATAATTTGGGG…	MVTTPTAAPRKPSKVEGIKERSNYLREPLATELLNDANYFTDDAVQILKFHGSYQQDNRDNRVKGQEKDYQFMLRTRNPGGLIPAQLYTALDDLSKTHGNQTLRVTTRQGLQIHGIVKKDLKMAIATVVNNLGSTLGACGDINRNVMAPAAPFRDKPEYGYAWDYANKVADLLSPQSGAYYEIWLDGEKVISGEEAPEVKAARQKDLNGTNLNDPKEPIYGQQFMPRKFKISVTVPGDNSIDVYTHDISLVVITDRHGELRGFNVLAGGGLGRTHNKEETFARAADPIGYVSKDDVYDLVKAIVATQRDYGDRHNRRHARMKYLLADWGVEKFRKQVETYMGKPFQSFKPLPAWRYQDYLGWHEQGDGKLFFGLSVENGRIKDEGDFQLKTALRKVVDQ…	ferredoxin-sulfite reductase	ferredoxin-sulfite reductase
NC_000911.1:1197262-1199166:+	NC_000911.1	HRIBO	CDS	1197262	1199166	+	slr1860	SGL_RS07445	icfG	1905	635	Yes	0.433929	3.49616	1.96505	0.109538	0.937195	0.523366	17.47	50.1	40.26	14.33	40.26	14.33	4.41	13.43	ATG	TAG	TGGTAAATTAAACCA	ATGAAAATGAAACTGATTCAACCTTTCATACAATCAATTCGGTTTCGCATTGTTGGACTTCTCCTGCTTTGTCTGATTCCTCCTACCTTAGGAGGGATTTTTCTTATCGACTCCTATACCGGAAGACAATTAAAAAAAATTGCAGAGCAAGATCTTCAAAGCCGGGCAAGATTGATTATCCAATTGATTTCCCGTTCAGATCGAGAGCGTCAACAAAGTACAGCTTTTGTTGCTTCCCAACCGGCAATAGTCGAATTCAACGTTGAAGCATCTCAGTATTTTTTAAACGAGTTCATTAAATTTCACCAATGGAATGGGTTCTTCGTTGTTGCCAACCAAGAGGGGGAACTAGTTGCGGGCAGTGATGGTGCCAACCAAGAAAAAGGATTACCTCTTAAG…	MKMKLIQPFIQSIRFRIVGLLLLCLIPPTLGGIFLIDSYTGRQLKKIAEQDLQSRARLIIQLISRSDRERQQSTAFVASQPAIVEFNVEASQYFLNEFIKFHQWNGFFVVANQEGELVAGSDGANQEKGLPLKHWFEEVKDKNRHLNRLFPGKTYAESKDCLIVPIHSKNDQTQIGIVVECIPLPVIADFVQKILKDAELERILLVNYEGYIYADTDFKNYGVLENKKKSPLVNRLLNDQSGFVYSQGKFSYLSPVHLRGAKTWGLIVENSESDIQAAILNVNRIGYLLVLVIGGIVAYASWMVIHHSTVPILDLTKASQAIAAGDLDYEININQGNRQDEIGILGNSFIYMKNQIKTLIAQEVKDGVNRLELEKGRQIQQNFLPISLPDLQQWQINAV…	carbon metabolisms regulatory protein IcfG	carbon metabolisms regulatory protein IcfG
NC_000911.1:3178231-3180135:-	NC_000911.1	HRIBO	CDS	3178231	3180135	-	sll0026	SGL_RS16595	ndhF4	1905	635	Yes	0.163268	2.4866	1.32493	0.0875527	1.42031	0.753932	13.93	70.52	85.32	28.36	85.32	28.36	7.47	40.28	ATG	TAA	GCAATCCCAAGCTCA	ATGTCCGATTTTCTTTTACAAAGTAGTTGGTTTATTCCTTTTTATGGTCTGATTGGGTCGATCCTTAGCCTGCCTTGGTCATTTCGCCTGATTAAACAAACGGGCCCTAGACCGGCGGCCTACTTCAATGTTTTCATGACTTTGGTTTCTGCCATCCATGGCATGGTTGCCCTCTCAGCCATTTGGCAAACACCGAGTGAGCAAATTGTTTTCCATTGGCTCCAGGTGGCGGATTTAGACCTCACCTTGGCGGTGGAGATTTCCCCGGTTAGTTTGGGGGCCCTATCGGTGGTGACTGGCATCAGTTTTTTAGTCCAGATTTTTGGTCTGGGCTACATGGAGAAGGACTGGTCCTTAGCTCGGTTCTATGGACTACTGGGATTTTTCGAAGCGGCCCTG…	MSDFLLQSSWFIPFYGLIGSILSLPWSFRLIKQTGPRPAAYFNVFMTLVSAIHGMVALSAIWQTPSEQIVFHWLQVADLDLTLAVEISPVSLGALSVVTGISFLVQIFGLGYMEKDWSLARFYGLLGFFEAALGGIALSDSLFLSYGLLEMLTLSTYLLVGFWYAQPLVVTAARDAFLTKRVGDIILLMGVVALSSYGQGLTFSQLDNWASTVPVTGITATLLGLSLIAGPTGKCAQFPLNLWLDEAMEGPNPAGIMRNSVVVSAGAYVLIKLQPVFTLSPIASKTLIVLGTLTVVMTSLIAIAQIDIKRTLSHSTSVYLGLVFIAVGLGQVDIAFLLLFAHAIAKALLFMSIGSIIFTTSGQNITEMGGLWNRMPVTTTSFVVGSAGLLAVFPLGMFW…	NADH dehydrogenase subunit 5 (involved in const itutive, low affinity CO2 uptake)	NADH dehydrogenase subunit 5 (involved in constitu tive, low affinity CO2 uptake)
NC_000911.1:3309530-3311431:-	NC_000911.1	HRIBO	CDS	3309530	3311431	-	sll1365	SGL_RS17190		1902	634	Yes	0.314571	2.03886	1.17671	0.590544	2.78519	1.68787	9.78	27.81	31.09	13.64	31.09	13.64	18.36	37.99	ATG	TAG	GATTAGGAAAAAGTT	ATGGAGCCGGTAACTGTGGGGCAAAAAGTGCTCAAACCAGCGGTGGGCTTGATTAATCAATTGCACTATCCCCAAAAGTTTGCTCTGATTAGTGTCTGTTTTTTGTTGCCCCTGGGTTTAGCCATTTTCTTGCTGCTGTCGGAAATTCAGGGTCAAATTCAGTTTGCCCAACTGGAGCAACAGGGTTTGGCTTACCTAGGGCCTCTGCAACAATTGCAACAAACAGTATTGGTGCAACCCCTAATTTCCCTGGGGCCTAACCATTGGCGATCTCCGGTTGATCAGTTGGCCCAAGTCCAGGAGCGATGGGGAAAAAAGTTAGCTACGGAAACGAATTATGGGGATTTAGAGCAAGTTTTATCCCAGGTTACAGATAGATCACAGGACACTTCAGAGCAA…	MEPVTVGQKVLKPAVGLINQLHYPQKFALISVCFLLPLGLAIFLLLSEIQGQIQFAQLEQQGLAYLGPLQQLQQTVLVQPLISLGPNHWRSPVDQLAQVQERWGKKLATETNYGDLEQVLSQVTDRSQDTSEQILQAIAVLRTQVGNQSNLILDPDLDSYYLMEALLLKLPQLQTDLAQLGTIITAHSGPGLSPAEESQVLVIKAQLAQLKTSLVKNLGVAFTHNARQQLQPRVINSLNGLTTVLEELEQSLTKVITGQIKLNDAQLNQQSQWGLLNSLHFWRVLSPELDQLLSERIQRFQQRQWLLSTFVLATLAIAVYLFWGFYASVMATIASLSSAAEKMVAGSETKAVELQTQDEMAEVVHAFNTVADALCRLTEKLQDENLRLEAEIDITRQLQ…	unknown protein	unknown protein
NC_000911.1:1664798-1666699:-	NC_000911.1	HRIBO	CDS	1664798	1666699	-	sll1228		hik4	1902	634	Yes	0.380065	2.24823	1.31415	0.252195	1.97695	1.11457	24.67	50.72	64.91	22.56	64.91	22.56	16.37	44.6	GTG	TAA	GACTGGGCCACAGCG	GTGCGTTTTGCCATAGAGCAACTGGGGCTGTTGTTTGGCTGTCAGCGGGTCCATGTGATTTACCATGACCCAGCCAAGGACTGTTTACACATGGCGGAAGAATGGTGTGCTGTGGGTATTGCCCCCCGGTTATCAACTTTTCAAGGAGTACCGGTGGCCACCTATCCTTGGCTCTGGGCCAATTTGCAGGATAGTGAAGGCGTTTTGGTGAGGGATGTGGAGCAAATGCCGCCGGAAGCTGAGATGGATAAGGTCTCCCTGCAATTTGACCTGGTGAAATCCATCCTAGTGGTGCCCATGGTTAAGGATGCCCAGGTGTTGGGCTACATCAGCATGGTTCATCTCCACGACAACTATGGTTGGAACCCGGAGGAGTTGAACTTGGCCAAACTGGTGGGA…	VRFAIEQLGLLFGCQRVHVIYHDPAKDCLHMAEEWCAVGIAPRLSTFQGVPVATYPWLWANLQDSEGVLVRDVEQMPPEAEMDKVSLQFDLVKSILVVPMVKDAQVLGYISMVHLHDNYGWNPEELNLAKLVGQFLAIAQARHQAETTLTQAKEAADAANRAKTEFLASISHELRTPLNAIIGFSQLLHRDPSLAPHRPTLDIINRSGEHLLELINDILEMSKIEAGRTTLNEKIIDCHRLLDNLQALFQLRAQEKQLLLKVERSPEVPEWIKTDGGKLRQVLINLLANAIKFTAQGGVTLKVKCLTAPQTDEGQGASIWLHFLVSDTGPGIAAHEMDELFVPFAQTETGLKSCQGNGLGLPISQKFVQLMGGQIQVRSKVDQGSAFFFAIPVQVMAAP…	two-component hybrid sensor and regulator	two-component hybrid sensor and regulator
NC_000911.1:161768-163663:-	NC_000911.1	HRIBO	CDS	161768	163663	-	sll0220	SGL_RS02630	glmS	1896	632	Yes	0.772048	4.7638	2.76792	0.306283	1.26115	0.783715	27.4	89.75	35.49	18.84	35.49	18.84	10.87	23.76	ATG	TAG	CATTGGGGAATCTCC	ATGTGTGGCATCGTTGGTTACATCGGCACCCAAACGGCAGTAAATATCCTCATTGAAGGGCTAGAACGCTTAGAATACAGAGGTTATGACTCCGCCGGCATTGCTACGGTCACCGAAGGAAAAATTGAGTCGGTGCGGGCTAAGGGCAAACTATTTAACCTCAAGGAAAAGCTAGAAAACCACAGCAACTTTTCCCGCCTGGGCATTGGACATACCCGTTGGGCCACCCACGGTAAACCGGAGGAGCATAACGCCCACCCCCACTTGGATAACCAGCAACGCATCGCCGTTGTGCAGAATGGCATCATCGAAAATTATCAAACCCTGAGGGATCAGTTAAAGGAAAAGGGTTACCAGTTTTATTCGGAGACGGATACCGAGGTCATTCCGATTTTGATT…	MCGIVGYIGTQTAVNILIEGLERLEYRGYDSAGIATVTEGKIESVRAKGKLFNLKEKLENHSNFSRLGIGHTRWATHGKPEEHNAHPHLDNQQRIAVVQNGIIENYQTLRDQLKEKGYQFYSETDTEVIPILIADILKDLPSDDPDEALLEAIGKAVHQLEGAFAIAVLDAHCPEQLIVARQQAPLILGFGQGEFFCASDVTALVHHTTTVLSLENGEIARLTPLGVEVYDFNLKRVRKLPRTLDWSATTVEKQGFRHFMLKEIYEQPAVVRTCLATYLNEQWRAADHPSHSPVFLGLDPQLTKNLQHIQVLACGTSWHAGLVGKYLLEQLAGIPTTVHYASEFRYAAPPLTPHTLTIGVTQSGETADTLAALEMEKQRRLTLEDDYKPLILGITNRPE…	L-glutamine:D-fructose-6-P amidotransferase	L-glutamine:D-fructose-6-P amidotransferase
NC_000911.1:1286868-1288763:-	NC_000911.1	HRIBO	CDS	1286868	1288763	-	sll1699	SGL_RS07890		1896	632	Yes	0.320915	1.88088	1.1009	0.128593	1.14476	0.636679	16.97	35.21	52.88	18.72	52.88	18.72	6.8	21.43	ATG	TAG	TCACAGGGGCAGTTT	ATGCGTTGGGGAAACAAAGTAGCAATGAGTAGGGTGGCGGGACAAAGAAAAACGGCGATCGCCAGGGAAAAAAATCCAGGCCAGCAAAATTACCTATCCGGTCGAAGTTGGGGGCAAAAATTAATCAGTGCTTTATTGTGTTGCCTTGCCCTGACGTTTTCATTGGGAGGTTGTTTTTCCCCGGAACTGAAAGACCAGGTGGTTTTTTCCGTGCTCAGTGACCCCAAAACTTTCAATGCGGTTCTGTCCCAAGAGTCCCCCAATGTTTTTGGTTATATCTACGAAGGGCTAATTAGGGAAAATCCTCTCACCGGGGAAAGAACGCCAGCCTTGGCGGAAAGTTGGGAAATATCACCGGACAATTTGACCATTACCTTTACCCTCAAGGAAGGTCTGCGT…	MRWGNKVAMSRVAGQRKTAIAREKNPGQQNYLSGRSWGQKLISALLCCLALTFSLGGCFSPELKDQVVFSVLSDPKTFNAVLSQESPNVFGYIYEGLIRENPLTGERTPALAESWEISPDNLTITFTLKEGLRWSDGKPLTVDDVLFSYNDLYLNPKIPNNYRDSLKVGESQAEPKITKVGDRQVAFNIPEPFAPFLETAQFPILPAHILRETVEKTDENGNPLFLSTWGTNTPPDQIVVNGPYKLTRYVTSQRVIFSKNPYYWEKGPNGESLPYIPRVVWAIVESTDTSLLQFRSGSLDSLGVPPESFSLLKQEEERGNFVIYNGGPTYASSYLTFNLNQGKRQGKPLVDPIKSRWFNNLNFRQAIAYGIDRERMVNNIYRGLGEKQNSFIPVQSPFF…	oligopeptide-binding protein of oligopeptide AB C transporter	oligopeptide-binding protein of oligopeptide ABC t ransporter
NC_000911.1:2801140-2803035:-	NC_000911.1	HRIBO	CDS	2801140	2803035	-	sll0556	SGL_RS14920		1896	632	Yes	0.310434	1.26675	0.78859	0.403666	2.06728	1.23547	21.51	42.55	69.29	33.59	69.29	33.59	27.97	69.44	ATG	TAG	ATTCCTTTGAGCCTT	ATGGAAGGATCATTTTCCCTTACCCTCCAGATTATCCTCACTGTCCTGTTTGGCATTGGGGCCCAAGTATTGGCGGGATTTCTCAAACTACCAAGCATTGTCTTTTTGCTTATTTTTGGTGTCATCCTCGGCAACAGCGGCTTGCATTGGATTCAACCCGCCAATTTTGGGGATGGTTTGGAAGTAATTGTTTCCCTTTCCGTGGCGATTATTTTGTTTGAGGGGGGCTTAAATTTAGGCCTGCGGGAATTGGGCCAGGTTTCCGGTAGTCTGCGTAATTTGGTCACCATCGGCACCCTAATTACCCTAGTGGGAGGGGGATTAGCGGCCCATTGGTTGGCGGAGTTCCCATGGTATTTAGCTTTTTTATACGGCTCCTTGGTGGTGGTAACCGGGCCA…	MEGSFSLTLQIILTVLFGIGAQVLAGFLKLPSIVFLLIFGVILGNSGLHWIQPANFGDGLEVIVSLSVAIILFEGGLNLGLRELGQVSGSLRNLVTIGTLITLVGGGLAAHWLAEFPWYLAFLYGSLVVVTGPTVVGPLIKQVQVQKSVATLLEGEGVLIDPVGAILAVVVLETIFNTNVSVETDIIEIAMGLILRLGVGLAIGVGGGWLLSNFLKRASFLSEDVSNLVVLAGVWGVFGAAQASLSESGLMATVAMGIYLNSSALPDNRLLRRFKGKLTLLCVSVLFILLAAELSLSSFGALGWGSVLTVAVLMLVIRPISIAICTWTSAFNWRQKLFVAWIAPRGIVSASVASLFSLLLTERGINGGDAIKSIVFLTIMMTVFIQGLTAKPLAKLLRI…	Na+/H+ antiporter	Na+/H+ antiporter
NC_000911.1:1248284-1250176:+	NC_000911.1	HRIBO	CDS	1248284	1250176	+	slr1888	SGL_RS07715		1893	631	Yes	0.253955	2.45482	1.35439	0.0949124	0.941117	0.518015	5.94	24.18	23.39	9.85	23.39	9.85	2.22	9.27	ATG	TGA	CCCCGGTCAAGAACT	ATGCCCAACTCTGATCGCCAGGAACAGTTAGCCCAACTACGGAGCCAATATCCCGAAAAGTTTGCGTCCTACAGTGAAATTTTTAGCCATATCCACCGGGGCGATCGCCTGTTTATCAGCACGGCCTGTGGGGAACCGCAGTACTTAGTGCAGGAGTTGGTCAACTATGTGCAAGCCCATCCTAAATCCCTATTTGATGCGGAAGTGCTCCAGGTTTGGACTCTAGGTTTAGCACCCTACACCGACAGTAAATTTGCCAAAAACTTTCGCCATAATTCCTTTTTCATTGGCCACCACACCCGTAGCGCCGTTAACGAAGGTTTAGCAGACTACACCCCCATTTTTCTTTCCCAGGTACCAGGGCTATTTGAGCAGGGATTTGTCCCTATCGATGTGGCT…	MPNSDRQEQLAQLRSQYPEKFASYSEIFSHIHRGDRLFISTACGEPQYLVQELVNYVQAHPKSLFDAEVLQVWTLGLAPYTDSKFAKNFRHNSFFIGHHTRSAVNEGLADYTPIFLSQVPGLFEQGFVPIDVALIQTSYPDDHGYVNLGVSVDIVKAAVEQACLVIAQMNSQVPRIHGDGFIALEKLDYIIAHDEPLLEYQMERDNILASRIGKYVASLIQDGDTIQVGYGSIPDAVLSYLGNKKNLGVHTELISDGLVQLLKSGAVNNSQKTRNRGKVVATFCMGSRSTYDYLNDNPAVEFRTVDYTNNPIIIAHHDNMVAINSALEIDLTGQSTAESLGSNFYSGIGGQADFMRGAVMANGGRTILALESTAENETISRIVPFLREGVGITLNRGDI…	4-hydroxybutyrate coenzyme A transferase.	4-hydroxybutyrate coenzyme A transferase.
NC_000911.1:958137-960029:+	NC_000911.1	HRIBO	CDS	958137	960029	+	slr1841	SGL_RS06365		1893	631	Yes	2.04087	7.29686	4.66887	1.35915	3.61161	2.48538	665.08	3079.86	325.88	422.08	325.88	422.08	442.92	1524.39	ATG	TAA	GAGGAAAAGCTAAAA	ATGCTTAAACTATCTTGGAAGTCCCTGTTAGTGAGCCCTGCTGTGATCGGTGCCGCCCTTGTGGCTGGTGCTGCTAGTGCTGCTCCCGACAACGTTACGAATGCTCAAGTTTTAGACCAATTAGACCAATACACTGCCGAAGGTCAGTCTTCTGCCATTGATCAAGTAACCAGCGTTAGCGAACTCCGCGATGTGCAACCCACTGCCTGGGCCTATGAAGCGCTCAAGAGCTTGGTGGAACGCTACGGTTGTATCGTTGGTTACCCTGACCGTACCTTCCGTGGTGATCGAGCCCTCAGCCGTTGGGAATTTGCCGCTGGTCTTAACGCCTGTATGAACGTTATGGAACGTTTGATTCAGGAAAACGTGGCTGTTCTCCGGGAGGACATCGACAAACTG…	MLKLSWKSLLVSPAVIGAALVAGAASAAPDNVTNAQVLDQLDQYTAEGQSSAIDQVTSVSELRDVQPTAWAYEALKSLVERYGCIVGYPDRTFRGDRALSRWEFAAGLNACMNVMERLIQENVAVLREDIDKLKRLMQEFEAELAALGARVDNLEARTSFLEDHQFSTTTKLTGEVIFAPTAIFGTKKTLNNQTDNNQAVFQNRVRLQFNTSFSGEDLLVTRLAAGNGNRFKSFYPTQNVIDPETGNPIGIVGDYYESPTFTQVHQLSPGDNNNVAVDWLAYYVPLDLGENFRLNNYIAAWGGIWDDFVPTLNPYFDDYTGGKGSLSQFTAQNPIYSIGGGTGIGTSLELGFLSNLLGPTSLSLGYLASTGNNPSSGGSVTNPATGNNYDFSSGGNGLF…	probable porin, major outer membrane protein	probable porin, major outer membrane protein
NC_000911.1:989717-991603:-	NC_000911.1	HRIBO	CDS	989717	991603	-	sll1463	SGL_RS06515	ftsH	1887	629	Yes	0.353321	1.89237	1.12284	0.40236	1.71392	1.05814	48.2	119.73	136.42	63.27	136.42	63.27	54.89	108.44	ATG	TAA	CTCTTCTCCCAACCC	ATGGCCATCAAACCCCAACCCCAATGGCAACGTCGCCTTGCTAGCGTCCTGCTGTGGGGCTCCACCATTTATCTGTTAGTGAACTTGCTTGCCCCGGCATTATTTCGCTCCCAACCGCCCCAGGTGCCCTACAGTCTTTTCATTGACCAGGTGGAAGGGGACAAGGTAGCCAGCGTTTACGTAGGACAAAACGAGATTCGCTATCAACTCAAACCGGAAGCAGAGGATGAGGGGAAAGAAAAAGCCGCCGAGGGGCAAATTTTAAGAACTACTCCCATTTTTGATCTGGAGTTACCCAAGCGCTTGGAGGCCAAGGGCATTGAGTTTGCGGCCGCTCCCCCAGCGAAAAATTCTTGGTTTGGCACCCTTTTGAGTTGGGTTATCCCTCCGCTGATTTTT…	MAIKPQPQWQRRLASVLLWGSTIYLLVNLLAPALFRSQPPQVPYSLFIDQVEGDKVASVYVGQNEIRYQLKPEAEDEGKEKAAEGQILRTTPIFDLELPKRLEAKGIEFAAAPPAKNSWFGTLLSWVIPPLIFVGIWSFFLNRNNNGAPGGALAFTKSKAKVYVEGDSTKVTFDDVAGVEEAKTELSEVVDFLKFPQRYTALGAKIPKGVLLVGPPGTGKTLLAKAAAGEAGVPFFIISGSEFVELFVGAGAARVRDLFEQAKKQAPCIVFIDELDAIGKSRASGAFMGGNDEREQTLNQLLTEMDGFSAAGATVIVLAATNRPETLDPALLRPGRFDRQVLVDRPDLAGRLKILEIYAKKIKLDKEVELKNIATRTPGFAGADLANLVNEAALLAARN…	cell division protein FtsH	cell division protein FtsH
NC_000911.1:331144-333027:+	NC_000911.1	HRIBO	CDS	331144	333027	+	slr0969	SGL_RS03425	cobJ	1884	628	Yes	0.240241	1.85633	1.04828	0.14241	1.55009	0.846248	9.97	32.43	41.5	17.47	41.5	17.47	5.91	27.08	ATG	TAG	CGAGAATTTGCCGCT	ATGCTAGGGGTTGACAATGATAGACGGCAAAAATTGTTGAAAACTTTTCATCCCCTTACGGCGATCGCCGTCACTCCCCAAGCCGTTAAATTGCTTCTGCCCGTGGTGGAAACGTTGACGGGAAAATTGCTTTTATCAAAATCTTTGGCAGAGGAATTAGAGCTTGGCAAAAATTCCCTAGTGGAAACCTATGGCGATTCTTTGGCAACGGCTGTGGCAGAACGCTGGAATAACCATCAAGCCTTTATTTTTGGTTTAGCCACGGGGGCCGTAGTCCGCTTAATTGCTCCTTTATTGCAAAGTAAACAAAGTGATCCCGCTGTGCTGGTGGTGGATGCCATGGGTCAATCGGTGATTAGTTTACTCAGCGGCCACCAAGGGGGAGGCGATCGCCTGGCG…	MLGVDNDRRQKLLKTFHPLTAIAVTPQAVKLLLPVVETLTGKLLLSKSLAEELELGKNSLVETYGDSLATAVAERWNNHQAFIFGLATGAVVRLIAPLLQSKQSDPAVLVVDAMGQSVISLLSGHQGGGDRLAQIVAEQLQAKAILTGGANGLGQIAVDCLGIPFGWRKGKGDWTAVSSALAAQKLVGVTQTAGLTLWQNHLPPGHGFTFSGTKETTATLLITVQESNLEKLNKPMAPWHPRLLWIGVGCVRGTDLALLERALLEVLERENLSPLAIAGLASVHLKADEVGMQQFAQKYDLPFFTFPPEQLAAQAVPNPSEVVLQEVGTPSVAEAAALTAAQMYSQGGKLIAEKVIVKQHNQAVTVAIAKGEREYIGKPGQLWLVGTGPGELSQISPAA…	precorrin methylase	precorrin methylase
NC_000911.1:2529009-2530892:+	NC_000911.1	HRIBO	CDS	2529009	2530892	+	slr0228	SGL_RS13625	ftsH	1884	628	Yes	0.96905	5.01856	2.99381	0.598109	2.21691	1.40751	63.56	145.99	65.59	29.09	65.59	29.09	39.23	64.49	ATG	TAA	AAAGTGAGCTAACAT	ATGAAATTTTCCTGGAGAACTGCCCTACTTTGGTCCCTACCCCTGTTGGTAGTCGGCTTTTTCTTCTGGCAGGGGAGCTTTGGAGGGGCAGATGCCAACCTCGGTTCCAACACTGCCAACACCCGCATGACCTATGGTCGCTTCCTCGAATATGTGGATGCTGGCCGCATCACCAGTGTGGATTTATATGAAAATGGCCGCACGGCGATCGTGCAAGTTAGCGACCCAGAAGTAGACCGGACCCTCCGTTCCCGGGTTGACCTCCCCACCAATGCCCCGGAATTGATTGCCCGTTTACGGGACTCCAACATTCGCCTTGATTCCCACCCTGTCCGCAACAATGGCATGGTTTGGGGTTTTGTGGGCAACTTGATTTTCCCCGTGCTTTTGATTGCTTCC…	MKFSWRTALLWSLPLLVVGFFFWQGSFGGADANLGSNTANTRMTYGRFLEYVDAGRITSVDLYENGRTAIVQVSDPEVDRTLRSRVDLPTNAPELIARLRDSNIRLDSHPVRNNGMVWGFVGNLIFPVLLIASLFFLFRRSSNMPGGPGQAMNFGKSKARFQMDAKTGVMFDDVAGIDEAKEELQEVVTFLKQPERFTAVGAKIPKGVLLVGPPGTGKTLLAKAIAGEAGVPFFSISGSEFVEMFVGVGASRVRDLFKKAKENAPCLIFIDEIDAVGRQRGAGIGGGNDEREQTLNQLLTEMDGFEGNTGIIIIAATNRPDVLDSALMRPGRFDRQVMVDAPDYSGRKEILEVHARNKKLAPEVSIDSIARRTPGFSGADLANLLNEAAILTARRRKSA…	cell division protein FtsH	cell division protein FtsH
NC_000911.1:2228445-2230328:-	NC_000911.1	HRIBO	CDS	2228445	2230328	-	sll1858	SGL_RS12340		1884	628	Yes	0.242385	1.37379	0.808087	0.173335	0.725737	0.449536	18.78	66.67	77.48	48.53	77.48	48.53	13.43	35.22	ATG	TAG	TAATCGGTAGCCCCC	ATGTCTAGTTCCCGTGGCCCCTATAAGAGTCGTCTTTTTACCAATCTCAATCGCCAATCCCAACGGTTACGCGATCGCCTGGGGGAAACAGTACGTCATCTGCGGGTGGCTGCGGAATGGGGCGTACAGGCTTTAATTTATCCCTTTTACTGGTTACTCCATCCAGAAAAGTGGTTAGGGCCAGTGTTGGGGAGCGGGGGCAATCAGCATCAACGGGTTTTACCTGCCGGAAAAGATGGAGACAAGGTAAATTCTGGGGATAGGGGAGATTTGGCGATCGCCGTTGACCAGCCCATTGAAACGGTACTTACCTCCCTCCAAGCTTGGTTTGACCATGCTGAAGTGGAGCAAACTGGTCAGGGTTTAGTTTTAGTCCAAGATTTCTCCGCTTTAGTCAAT…	MSSSRGPYKSRLFTNLNRQSQRLRDRLGETVRHLRVAAEWGVQALIYPFYWLLHPEKWLGPVLGSGGNQHQRVLPAGKDGDKVNSGDRGDLAIAVDQPIETVLTSLQAWFDHAEVEQTGQGLVLVQDFSALVNHQSPGENIVSVHNQDLALPGQPEKPALPPSAHPSLLAKLGEQVKSIFQTDNNAIVIQGLASRCGDRRLVLTTKDNLTLDVFSSEQQQQLQQQIRRELAQWHYQRRRQWALQAQNWRGIPLITGKSDQSGDLERQPRVIAPLDWLWQGIYRWQTRPPLTTLGQSTGAIIPTAVSTPDLNGLKHWLTQTATTLGQQPVIEATVVKSQQLSQQIVEVLPPTVQHLGQGLQHRVQQTLEQLFNSDRHPVNGPDPFELKVILQAAIAYFFG…	unknown protein	unknown protein
NC_000911.1:1157029-1158909:-	NC_000911.1	HRIBO	CDS	1157029	1158909	-	sll0865	SGL_RS07280	uvrC	1881	627	Yes	0.821853	4.12335	2.4726	0.203088	1.44714	0.825112	6.92	18.72	8.42	4.54	8.42	4.54	1.71	6.57	ATG	TAA	TCTTTTGCTTAATCA	ATGGTTGCTACTGTTTCCTCTACGTCTCTTCTTGAACAACCAGAATTATTAGAACGGCGTCTCCAGGAAATTCCCCAAGAGCCGGGGGTTTACTTCATGGGCGATCGCCAAGGAGAAATTCTCTACATCGGCAAGGCAAAAAAATTGAGAACTAGGGTTAGATCCTATTTTCGGGATTCCCAACCCCACACTGCCCGCATTGCTTTGATGGTGCAACAGGTAGCGGAAATTGAGTTTATTGTCACCGATACGGAAGCGGAAGCTTTAGCCTTAGAAGCTAATTTAATCAAACAACACCAACCCCATTTTAATGTTCTGCTTAAAGATGATAAAAAATATCCTTATGTGTGTATCACCTGGTCAGAAACCTATCCCCGTATTTTTATTACCAGAAAACGC…	MVATVSSTSLLEQPELLERRLQEIPQEPGVYFMGDRQGEILYIGKAKKLRTRVRSYFRDSQPHTARIALMVQQVAEIEFIVTDTEAEALALEANLIKQHQPHFNVLLKDDKKYPYVCITWSETYPRIFITRKRRLNQAKDRYYGPYVDSFSLRQTLRLIQRIFPLRQRRQPLFKHRPCLNYDIGRCPGVCQELITPEDYRQTLQKVAMVFQGRTQELHQLLTQQMEKAAADLKFEQAALIRDQINSLGKLNADQKVSLPQDTISRDAIAVASDGQISAIQLFQIRAGRLVGRLGFFADGVESELEKGEVLQRVLEQHYQQVEAVEIPSEVILPCALPDGELLNDWLTSQRGRKVTFNLPQRQTKAELLEMVERNAQYELERLQKQTAKNVTALEDLAEI…	excinuclease ABC subunit C	excinuclease ABC subunit C
NC_000911.1:1854102-1855982:+	NC_000911.1	HRIBO	CDS	1854102	1855982	+	slr1265	SGL_RS10640	rpoC1	1881	627	Yes	0.477357	4.92195	2.69965	0.096842	1.07505	0.585946	122.59	410.54	256.81	83.41	256.81	83.41	24.87	89.67	ATG	TAA	TGTTCCTTGCCCAGC	ATGAAAGCCCAATCAGAACCTCGGTTTGATTACGTCAAAATTGCGATCGCCTCCCCCGAAAGGATCCGCCAGTGGGGAGAACGCACCCTACCGAACGGCACCGTAGTGGGGGAAGTGACCAAACCCGAAACCATTAACTACCGGACGTTAAAGCCGGAAATGGACGGTCTGTTCTGTGAAAAAATCTTTGGTCCTTCCAAGGATTGGGAATGCTGGTGTGGCAAATATAAACGGGTACGGCACCGGGGCATTGTTTGTGAGCGCTGTGGCGTGGAAGTAACGGAATCTAGGGTTCGTCGTCACCGCATGGGCTACATCAAATTAGCCGCCCCCGTCACCCACGTTTGGTATCTCAAAGGCATCCCTAGCTATCTCAGCATTCTTTTGGACATGGCCCTG…	MKAQSEPRFDYVKIAIASPERIRQWGERTLPNGTVVGEVTKPETINYRTLKPEMDGLFCEKIFGPSKDWECWCGKYKRVRHRGIVCERCGVEVTESRVRRHRMGYIKLAAPVTHVWYLKGIPSYLSILLDMALRDVEQIVYFNAYVVLNPGNASNLQYKQLLTEDQWVEIEDQIYAEDSELEGIEVGIGAEAVQRLLAELQLEEVAEKLREEILASKGQKRAKLIKRLRVIDNFIATHSQAEWMTLDVIPVIPPDLRPMVQLDGGRFATSDLNDLYRRVINRNNRLARLQEILAPEIIVRNEKRMLQEAVDALIDNGRRGRTVVGANNRALKSLSDIIEGKQGRFRQNLLGKRVDYSGRSVIVVGPNLKIYQCGLPREMAIELFQPFVIHRLIKLGIVN…	RNA polymerase gamma-subunit	RNA polymerase gamma-subunit
NC_005229.1:77192-77941:-	NC_005229.1	HRIBO	CDS	77192	77941	-	MYO_RS16930			750	250	Yes	0.321735	1.35232	0.83703	0.160456	0.75391	0.457183	3020.99	8854.36	9389.67	6547.51	9389.67	6547.51	1506.63	4936.23	GTG	TAG	ACAACACTTACAATC	GTGAAAAAACTGGACGGAAAAGTTGCAGTCGTCACAGGGGCATCTAAAGGAATCGGTGCCGAGATCGCTAAACATCTAGCAGGCGAAGGTGCAGCCGTGGTCGTCAACTACGCATCTAGCAAAGAAGGAGCCGATCGCGTGGTTGACGAGATTGTCAGCACGGGTGGAAAGGCGATCGCCGTGCAGGCAAATGTTGCTAAAAAGGCAGAGATTCAACAGCTTTTTGCTGAGACGAAACAAGCCTTTGGCAAGCTCGATATCCTGGTCAATAATGCAGGCATCTACGAATTTTCTCCGCTTGAAGGCATCACAGAAGAGCATTTCTACAAGCAATTTGATCTGAATGTGCTGGGTTTGCTTTTGACCTCGCAACAGGCAGTAAAGTCCTTTGGTGAAGAG…	VKKLDGKVAVVTGASKGIGAEIAKHLAGEGAAVVVNYASSKEGADRVVDEIVSTGGKAIAVQANVAKKAEIQQLFAETKQAFGKLDILVNNAGIYEFSPLEGITEEHFYKQFDLNVLGLLLTSQQAVKSFGEEGGSIINISSIVSTLTPANSLVYNATKAAVDAITKSLAKELGSRNIRVNSINPGMVETEGARTAGITESEGRRQVEAITPLGRIGQPHDIAPAVVFLASSDSAWITGETLYITGGLY	3-oxoacyl-ACP reductase	Derived by automated computational analysis using gene prediction method: Protein Homology.
NC_000911.1:454712-456586:-	NC_000911.1	HRIBO	CDS	454712	456586	-	sll1516			1875	625	Yes	0.241419	2.62039	1.4309	0.112611	2.15401	1.13331	6.26	24.16	25.93	9.22	25.93	9.22	2.92	19.86	ATG	TAG	GGCGATGCACCGGTA	ATGGGCAAAACCCCCCTGGGACTGATGAGGGAGGACGTGCATTTATTTTGGCCCCTATTGCTAGAGGCAGGGATCAGCAAGCAACTTTTCCCCACCCAGTTACGACCGGAAACGGAACAATGGTTGGCGATGGAGCAATGGCAAAACCAATACCCAGGCCGGGATAGTTCCTTAAATGCAGCCCAGAGGTCCAGGTTAGTTCGTAACCTATTGGATTTGGGTCAGTTGGCGGGGGCAGCGGGTTGGACCGATCGCCAGGTGCTGGAACGATTAACGGCAGGGGAAATCCGGGTAACCCCAGGGGAGATTAGTGCAGAAGAGGCGATTGCCTTTTGGCAACATTGGCGGCAATGGTGTTTGGCCAGGGGATTTTTAACCTATGGGCTGATTTTTCATTGT…	MGKTPLGLMREDVHLFWPLLLEAGISKQLFPTQLRPETEQWLAMEQWQNQYPGRDSSLNAAQRSRLVRNLLDLGQLAGAAGWTDRQVLERLTAGEIRVTPGEISAEEAIAFWQHWRQWCLARGFLTYGLIFHCYGQYLLKKPQYQQYLCQRYDAIFADDVDDYPAIAVDLFNQLQSHCSWAVFSFNPDGQVRLGLNADPNALAILAQGAKVERLERPTGMAPQLSTQVLNLLKDPRSPDILPPQVQALQTFSRAQLLRQTADQIIAAVHQGEIKPQDIAIIAPGLDEIARYSFLEIFNKAGIDIIALNEQRPLSSAPLIRSLLTLLALVYDLGEWARREQVAEMLVMLSERRSGGQIKLAIDPVRAGLLADTCYAINPQAPALMPIEQYPRWDRFGYQA…	hypothetical protein	hypothetical protein
NC_000911.1:3287390-3289264:+	NC_000911.1	HRIBO	CDS	3287390	3289264	+	slr1428			1875	625	Yes	0.178134	1.66692	0.922526	0.0847167	0.615298	0.350007	15.56	44.24	87.35	26.54	87.35	26.54	7.4	16.33	GTG	TGA	TTTCGTCCCTGGCAG	GTGGGTATTTTAATTTTGCCCATTGCCGGGGTAATAAGCTTTTTGCTGGTGGCGGCCAGTTGGCAAATTAATGCTTGGCATTTGAACTGGATTTGGGCAGTGGTGGTGCTAATTTTCCTGGGCTGGCGTTGGTTGCTAGTGCGGTGGACCGCTCCCTTAGCGGCTCCCAATGGACAAACATCTTTCCCTACCATTTCCCTGGGAGAGTCCACGGCGGACGTTAACGTTGGGAAAATTGAGCAGGCGTTAAACGAGATTCTCCAGGCTTCCCGTCAAGATGTGCCAGCGTGGCAGGATTGGCCCCTATTTTGGCAGAGATGTCAGCAGGTGGTGACGTTAGTGGCCCAGACCTATTACCCAGAAGTGAAATATCCCCTACTCAACATCTACGTACCGGAT…	VGILILPIAGVISFLLVAASWQINAWHLNWIWAVVVLIFLGWRWLLVRWTAPLAAPNGQTSFPTISLGESTADVNVGKIEQALNEILQASRQDVPAWQDWPLFWQRCQQVVTLVAQTYYPEVKYPLLNIYVPDAYGLIRGTVDDMDRWVANLSPTLNQVSLARVYQSYEVYQKLEPSLRKIWQVWYWGQWLLNPVAAAARLASQQSNQQATQQLLVNLSQQLREATLRTLCRQAIALYNPASGNLPDNFASGGNSIPGLVKAKSQTLQNILAQGQSPQEVEQQPVNVLLVGRTGAGKSSLINALFQTNLAVTDLLPSTTEITKYEWRTRDGEMLMLWDSPGYEQGQRKDLRQLVLDYAQRADVILLLNPALDPALQMDADFVRDLQTLGGDRPLILLVT…	hypothetical protein	hypothetical protein
NC_000911.1:1548873-1550738:+	NC_000911.1	HRIBO	CDS	1548873	1550738	+	slr2088	SGL_RS09105	ilvG	1866	622	Yes	0.468113	5.30494	2.88653	0.127479	1.42776	0.777619	137.63	494.58	294.01	93.23	294.01	93.23	37.48	133.11	GTG	TAA	AAAGCGATTTGTCCA	GTGGTTGCATCAATTCCTAATCCCAAAACAAATTTCCTGAAAACTGTTCCTAGCCAACGGCAAACCGGGGCTTATATCCTGATGGATAGCCTGAAACGCCATGGGGTCAAACACATTTTTGGCTATCCCGGCGGGGCAATTTTGCCCATCTATGATGAACTGTACCGCTTTGAAGCGGCGGGGGAAATTGAGCATATTTTGGTGCGCCATGAACAAGGAGCTTCCCATGCGGCGGATGGGTATGCCAGAGCCACAGGTAAAGTGGGAGTTTGTTTCGGTACATCTGGACCAGGGGCGACTAACTTGGTGACCGGCATTGCCAATGCCCATTTGGACTCGGTGCCCATGGTGGTGATTACTGGACAGGTGGGCCGTGCCATGATTGGTAGCGATGCTTTC…	VVASIPNPKTNFLKTVPSQRQTGAYILMDSLKRHGVKHIFGYPGGAILPIYDELYRFEAAGEIEHILVRHEQGASHAADGYARATGKVGVCFGTSGPGATNLVTGIANAHLDSVPMVVITGQVGRAMIGSDAFQEIDIFGITLPIVKHSYVVRSAADMARIVTEAFHLASTGRPGPVLIDIPKDVGLEECEYIPLDPGDVNLPGYRPTVKGNPRQINAALQLLEQARNPLLYVGGGAIAANAHAQVQEFAERFQLPVTTTLMGIGAFDENHPLSVGMLGMHGTAYANFAVSECDLLIAVGARFDDRVTGKLDEFASRAKVIHIDIDPAEVGKNRAPDVPIVGDVRHVLEQLLQRARELDYPTHPHTTQAWLNRIDHWRTDYPLQVPHYEDTIAPQEVVH…	acetohydroxy acid synthase	acetohydroxy acid synthase
NC_000911.1:2182096-2183958:+	NC_000911.1	HRIBO	CDS	2182096	2183958	+	slr0152	SGL_RS12145		1863	621	Yes	0.724461	1.38517	1.05481	0.736874	1.18452	0.960698	35.6	38.66	49.14	27.91	49.14	27.91	36.21	33.06	ATG	TAA	CTAGGCGTATTTTTT	ATGGTAAAGACTGCCAATGTGGCGGTTATGCCGCTGTTTCCCCGCTCCCAATATAGAATCATTGGACAGATCGGACAGGGACAGTTCGGGCGGGTTTACTGTGCTATTCACCGGACTACGGGCAAAATGTATGCCCTGAAGGATTTAGAACATCGGGTATTTCCCACTAATAAATTTCTGCGGGAACTGTCCTATCTGTTGACCCTGCGCCATCCCAACATTGTGGCTTGCCATGGTTTGGAGTACCATCCTGGGGGCCGCTATTTGGTGATGGATTACTGTGAGGGGGGAACTCTGCGGGACATTATTGATGGGGACGGAGATTTATGTTTGGCGGGAAAAATAGATTTATTAAGACAAATATTGCTGGGTTTGGCCCAAGCCCATCAGCATGACATT…	MVKTANVAVMPLFPRSQYRIIGQIGQGQFGRVYCAIHRTTGKMYALKDLEHRVFPTNKFLRELSYLLTLRHPNIVACHGLEYHPGGRYLVMDYCEGGTLRDIIDGDGDLCLAGKIDLLRQILLGLAQAHQHDIVHCDLKPENILLIPRAEGWQVKVSDFGIARLTAKTGNPNFSKGYTGSPAYMAPERFYGKFSVASDIYAVGILLYELIVGDRPFSGFPKALQAAHLNVRLTLPPEFPPLLAPIVQRALEKLPQRRFPNATAMASDLATVQKQILEQDPPRGNGYLYHHLAPAPLAFTATVKHSTPLLFPISHLTGAGLWLYLGNGAELYLWEYGDGNVEHHPLPRWALGLPGTIANLEVNQDQISLLIQGGEPGEWQFYQWRETLLGALSLPKPRIN…	serine/threonine protein kinase	serine/threonine protein kinase
NC_000911.1:3123182-3125035:+	NC_000911.1	HRIBO	CDS	3123182	3125035	+	slr0765	SGL_RS16395		1854	618	Yes	0.66658	2.04237	1.35448	0.501043	2.76898	1.63501	25.57	55.43	38.36	27.14	38.36	27.14	19.22	75.15	ATG	TAG	TAAATATCAAGAACC	ATGCCCTTAATTACCAAACTAAAAAAATATCGACGAAAATATAAACGCTTCTTCTGGCTCGGTTGTGTTGTTTTAGCGCTACTACTGATCATTCCTCACCCCAGCCAAGCCCAATTCGTTATGCCCCAAGGTTTTAGTGGCCAGGGCAGTGGCTATAAACCGCCGGAAGTTTCCCGGTATGGTCCCATCGAAGTGGCTCCGGTACGATCGCCCGTTGACAACGGTTTTCTGTTTGATGTGGCCTCCCCCACTGTGTATAACCGCCAAGAGAATACCAGCCAAATTCCTGTGGAGCAAAGGGCTCAGGACATTGAAAGCAAATTGGAACTGGCTATTTTCAGACGGGATATGAACCCCGATGACCTAAGGGTAGAAACTTCCCGGCTCAACAATGTGGTG…	MPLITKLKKYRRKYKRFFWLGCVVLALLLIIPHPSQAQFVMPQGFSGQGSGYKPPEVSRYGPIEVAPVRSPVDNGFLFDVASPTVYNRQENTSQIPVEQRAQDIESKLELAIFRRDMNPDDLRVETSRLNNVVVVTVSNDDYPLPLVLASVTENDADFNGQPIDVLAEQWREKLDKEIRRGQASTTPEALEQSFKQAFQIFVALLVATAIVASIKHLISRHRQRLLNRKQAIAAEKQANSEVLEENHPDPIEVNYAAPEILGEQQWIFWQRLPQILSIDRKIGFWKFIQWLLFWVIILGWYFGLFAIFRQIPGLATLSGAILGRPLQLLMLWFFVGLTIRISHRIIELLKDNWQNTNSTSFNKFINLGDDQRRDLRISTISGAIKGMVTVVISASGLLT…	hypothetical protein	hypothetical protein
NC_000911.1:742780-744633:-	NC_000911.1	HRIBO	CDS	742780	744633	-	sll1927			1854	618	Yes	0.228968	2.27938	1.25417	0.108497	1.03723	0.572863	21.8	70.41	95.21	30.89	95.21	30.89	10.33	32.04	ATG	TAG	CGTCTCCAAACATCT	ATGAATGACCTGATTTTGGCTGTGCGTCAACTGGAAATTGCTTTCCCCGATGCTGATACCAGGGAAAAATTGTTGGCCGTCAAAGGGGTTGATTTTGAGTTAGAGCGGGGGGAAATCCTCGGCATTGTGGGGGAATCTGGTTCCGGTAAATCCGTCACTTCCCTGGGCATTATGGGGTTGGTGCCCAAGCCAGGCTGGGTGGAACCTAGCAGTGAAATTGATTTTTTTGCCCAGGCCCAGAGTTCCCCTGTCAACCTAGTTGCTCTGCCAGAGGGGGACAAGCGTCAGTACCGGGGCGGCAAAATTGCCATGATTTTCCAGGAGCCAATGAGTTCCCTTAATCCGGTTTATACCATTGGCTTTCAAATTATTGAAGCAATTCGCCTCCACCAAAACGTT…	MNDLILAVRQLEIAFPDADTREKLLAVKGVDFELERGEILGIVGESGSGKSVTSLGIMGLVPKPGWVEPSSEIDFFAQAQSSPVNLVALPEGDKRQYRGGKIAMIFQEPMSSLNPVYTIGFQIIEAIRLHQNVTQEEAQNQAIALLQEVRVLPKDEVLEEEFLAQEQAQPRGKVTQNLASYIQQRKQSFLKRYPHELSGGQLQRVMIAMAISANPRLLIADEPTTALDVTVQAEILRLLRDLCKQHQEMSLIFISHDLGVINEIADRVAVMYRGEIVEQGLKEQILHSPQHPYTKGLLACRPRLEIQLDHLPTVGDFLNADGPPPSYQVITPAQESDRLAQLQAKPPLLEVQNLTVSYGQGGLFGKKSVFKAVNDVSFQVYPGETLGLVGESGCGKSTL…	ABC transporter ATP-binding protein	ABC transporter ATP-binding protein
NC_000911.1:471080-472930:+	NC_000911.1	HRIBO	CDS	471080	472930	+	slr1604	SGL_RS04115	ftsH	1851	617	Yes	0.559653	2.98273	1.77119	0.328094	1.46156	0.894825	55.54	129.57	99.24	43.44	99.24	43.44	32.56	63.49	GTG	TAA	TTGGAGAGTTCTAGC	GTGAGCAAAAATAATAAAAAATGGCGTAACGCGGGCCTATATGCCTTGTTGTTAATTGTCGTTTTAGCGTTGGCATCGGCCTTTTTCGACCGACCGACCCAAACTAGGGAAACCCTCAGCTACAGCGATTTTGTCAATCGGGTAGAAGCCAATCAGATCGAACGGGTCAACCTCAGTGCCGACCGCACCCAAGCCCAAGTACCCAATCCCAGCGGTGGTCCTCCCTACTTAGTCAATCTGCCCAACGACCCCGACTTGATCAATATTCTCACCCAACACAACGTGGATATTGCTGTCCAACCCCAGAGCGACGAAGGTTTCTGGTTCCGCATCGCCAGCACCCTATTTTTGCCCATCTTGCTCTTGGTGGGAATTTTTTTCCTCTTCCGTCGGGCCCAG…	VSKNNKKWRNAGLYALLLIVVLALASAFFDRPTQTRETLSYSDFVNRVEANQIERVNLSADRTQAQVPNPSGGPPYLVNLPNDPDLINILTQHNVDIAVQPQSDEGFWFRIASTLFLPILLLVGIFFLFRRAQSGPGSQAMNFGKSKARVQMEPQTQVTFGDVAGIEQAKLELTEVVDFLKNADRFTELGAKIPKGVLLVGPPGTGKTLLAKAVAGEAGVPFFSISGSEFVEMFVGVGASRVRDLFEQAKANAPCIVFIDEIDAVGRQRGAGLGGGNDEREQTLNQLLTEMDGFEGNTGIIIVAATNRPDVLDSALMRPGRFDRQVVVDRPDYAGRREILNVHARGKTLSQDVDLDKIARRTPGFTGADLSNLLNEAAILAARRNLTEISMDEVNDAID…	cell division protein FtsH	cell division protein FtsH
NC_000911.1:1856070-1857917:-	NC_000911.1	HRIBO	CDS	1856070	1857917	-	sll1178	SGL_RS10645		1848	616	Yes	0.4422	1.99218	1.21719	0.347988	1.50596	0.926973	26.05	53.51	58.91	26.86	58.91	26.86	20.5	40.45	GTG	TAA	TCAGGATAGTTTAAC	GTGACTCATATTCTTGGCATTTCTGCTTACTACCACGACAGTGCGGCGGCCCTGGTCAAAGATGGCGTTATTGTGGCGGCAGTGCAGGAAGAAAGATTTACCCGCAAAAAACACGACGCTTCTTTTCCCACCCAAGGCATTAATTATTGTCTTGGGGAAGCAGGTATTAGTTTAAAAGAAGTGGATTATATTGTTTTCTACGAAAAGCCCTTAGTGACCTTTGAACGGTTACTGGAAACCTATCTGGCTTTTGCCCCCAGGGGATTGCGGTCTTTCATTGCCGCCATGTCCGCTTGGTTGCAGGAAAAACTTTACCTCAAAACTGTCTTAAAAAAAGCCCTAGCAGAATTGGGCGACTGTAAGACCAAAGATTTGCCTCCTTTGTTATTTAACGAACAT…	VTHILGISAYYHDSAAALVKDGVIVAAVQEERFTRKKHDASFPTQGINYCLGEAGISLKEVDYIVFYEKPLVTFERLLETYLAFAPRGLRSFIAAMSAWLQEKLYLKTVLKKALAELGDCKTKDLPPLLFNEHHQSHAASAFFPSPFDEAAVLCMDGVGEWATTSLWSGQGNQLTPHWEIHFPHSLGLLYSAFTYYTGFKVNSGEYKLMGLAPYGEPKYVDLILDNLLDLKADGTFRLNMAYFNYATGLTMTNKKFADLFGAPRRSPESPLTQREMDIAASIQVVTEKVVLRLGNTVYEELGLENLCLAGGVALNCVANGRLLREGKFKNIWIQPAAGDAGGAIGAALSVWHQYLQNERMVRKPDAMAGSYLGPRFTNEEIETYLKGPAVQAVYDYYSD…	probable carbamoyl transferase	probable carbamoyl transferase
NC_000911.1:3133291-3135138:-	NC_000911.1	HRIBO	CDS	3133291	3135138	-	sll0739	SGL_RS16430	modB	1848	616	Yes	0.54372	0.508557	0.526139	0.674957	0.871463	0.77321	34.76	14.56	63.93	28.63	63.93	28.63	43.15	24.95	ATG	TAA	CGACATTGCCCCACG	ATGGCCACCGACCTTACTCCCCTCTGGATTTCCCTCAAAACTGCCGGATTAGCAACCGTGGTCACATTCATCCTTGGTATTGCGGCAGCCTATGGGATGTTAGGCGATCGCCAGCCGGGAAAGTCTTTGGTTGAGGCCGTTTTTATTGCGCCGTTAATTTTGCCGCCCACGGTGGTGGGTTTTTTGCTGTTGTTATTGTTTGGCAAAAATGGCCCGTTGGGAAAAATCCTGGCCCAGTTTGATGTCACCATCGTTTTCACTTGGTATGCCGCTGTGATCACCGCCACGGTAGTGTCCTTTCCCCTGATGTATAAAACAACATTGGGGGCCTTTGAGCAAGTCGATCGCCATCTGTTGCAAGTTGCCCAAACCCTGGGAGCTTCGAGGGGAGAAGTTTTT…	MATDLTPLWISLKTAGLATVVTFILGIAAAYGMLGDRQPGKSLVEAVFIAPLILPPTVVGFLLLLLFGKNGPLGKILAQFDVTIVFTWYAAVITATVVSFPLMYKTTLGAFEQVDRHLLQVAQTLGASRGEVFRRILLPLSLPGILAGTTLAFARSLGEFGATLMVAGNIPGQTQTIPMAIYFAVEAGAMGEAWLWVGIILVISLAGIMAANIWQRRYEDKIHNPQPQEHRLTVLFQNNGWENSSSHYPKLGEVEPGIQVNIQKQLAQFSLDVTFTTQGETVGLLGASGSGKTMTLRCIAGIETPTQGRIILNGRTLFDSQRNINVPSHERKVGLVLQNYALFPHLTVAQNIAFGLRHLSPQRRSLRVEEQLTLVNLEKMGDRYPHQLSGGQQQRVALA…	ATP-binding protein of molybdate ABC transporte r	ATP-binding protein of molybdate ABC transporter
NC_000911.1:938393-940240:-	NC_000911.1	HRIBO	CDS	938393	940240	-	sll1732	SGL_RS06295	ndhF3	1848	616	Yes	0.105771	2.67277	1.38927	0.190064	5.12827	2.65917	87.46	285.88	826.88	106.96	826.88	106.96	157.16	548.52	ATG	TAA	TTTCCCACAACCCCC	ATGTTAGAAAGTTTAAGTCGAATTATCTGGCTAGTACCTTGCTACGCTCTTTTGGGTGCCCTGTTAGCGGTCCCCTGGTCACCGGGCTTAACTCGACAAACGGGGCCAAGGCCGGCAGGCTATATAAGCACATTAATGACTTTTGTTGCATTTTTGCATAGTCTGTTGGTGCTTATACATATTTGGCAGCAACCCGCCATCGATCTTTCCTTCCCCTGGCTACATGCCGCTGACTTAGAAATTAACTTTGATTTAAAAATATCCACTGTTAACATCGCCGCCCTGGTTTTGATTACTGGGTTAAATTTGGGGGCACAGATTTATGCCATCGGATATCTAGAAAGGGATTGGGGCTGGGCCAGATTTTTTTCCCTAATGGCTCTGTTTGAGGCGGGATTA…	MLESLSRIIWLVPCYALLGALLAVPWSPGLTRQTGPRPAGYISTLMTFVAFLHSLLVLIHIWQQPAIDLSFPWLHAADLEINFDLKISTVNIAALVLITGLNLGAQIYAIGYLERDWGWARFFSLMALFEAGLCTLVLCNSLFFSYVVLEILTLGTYLLIGYWFNQSLVVTGARDAFLTKRVGDLILLMGVVALLPLAGSWNYDDLAQWAASADLNPTAATLLCLALIAGPLAKCAQFPLHLWLDEAMEGPIPATILRNTLVVATGAWVLVKVQPILALSPVALTVMIAIGSVTAIGASLIAIAQIDIKRFLSYVVSAYMGLVFIAVGTGQGETALQLIFTYTFAMAILVMCVGGIILNNVTQDLTQYGGLWSRRPISGLSYLVGVASLIALPPFGTFW…	NADH dehydrogenase subunit 5 (involved in low C O2-inducible, high affinity CO2 uptake)	NADH dehydrogenase subunit 5 (involved in low CO2- inducible, high affinity CO2 uptake)
NC_000911.1:1078657-1080501:+	NC_000911.1	HRIBO	CDS	1078657	1080501	+	slr1443	SGL_RS06920	pknA	1845	615	Yes	0.292507	1.84358	1.06804	0.368156	2.71061	1.53939	4.06	16.5	13.88	8.95	13.88	8.95	5.11	24.26	ATG	TGA	GCTTCCTTTCCCCCA	ATGACCCCATCCTTGTCCCTGGGCCAACGCCTCGATGACCGTTACCTGATTCAACTGCATTTAGGACAAAATTCCCTGGGTCAGCAGTATCTGGCCCAAGATACCCACCGCTTTGATGAACCCTGCACCATCACGGTTTTAACTGCGCCCCCCGGGGACAAAGCCGGCAATTTGTTTAAGCAACAGGCGGAAATACTCTACGCCCTCGACCATCCCCAAATTGCTAATTTCCGGGAGTTTTTTGCCCTGGGGTCAGAGCTTTATCTAGTACAGGATTTTATCGAAGGACAATCCTATTTCGATTTGCTCAAAGACCGCCGCCTTCAGGGGAAAGCTTTTACGGAATTGGAAGTACGCCAATGGTGCCGTCAACTGCTACCGGTTTTACACTATCTCCAC…	MTPSLSLGQRLDDRYLIQLHLGQNSLGQQYLAQDTHRFDEPCTITVLTAPPGDKAGNLFKQQAEILYALDHPQIANFREFFALGSELYLVQDFIEGQSYFDLLKDRRLQGKAFTELEVRQWCRQLLPVLHYLHIQKICHGQISPSSIMRRTVDGLPVLVDFTHSQYYSGTPGEDRRDLHGLGLGAIALLTGEVNPNPPWENLLSSVALSQEFRQLLLKLLAWPPLVDWPTLTDNLNNLPQHFLPTVAEFNLTSTIPEQTDNGVGKSSTGEPPFPTVHQSPESSSSAKVKNMVRVDGLKGLVKKSFILLGLMAIAMALGWGAGQLWLDNQQRAALEKLAQEEPGDDVPEKTDLEIKNEIRARRLNLGISPQRFQTLMDDGLAFQLGIDPQQRLEKNPNTN…	serine/threonine kinase	serine/threonine kinase
NC_000911.1:698970-700814:+	NC_000911.1	HRIBO	CDS	698970	700814	+	slr1392	SGL_RS05125	feoB	1845	615	Yes	0.267033	1.70166	0.984345	0.12967	1.74724	0.938454	4.86	12.32	18.2	7.24	18.2	7.24	2.36	12.65	ATG	TGA	GAGAGTAGGGCGGAG	ATGGTGAGTCATTGCCAAAGGGGGTCAGTCCAGTCCAGTCGTCCAGATGTGAAAAAAAGGGTTGCTTTTATTGGGCAGCCCAATACAGGTAAATCCACTTTCTTCAACCGGATCACCAAAGCCAATGCGGCGATCGCCAACTGGCCGGGGTTGACAGTGGACTTATTCCGGGCGGTGGTGCCGTTACAGGGGGAACTAATCGAGTTTGTTGATCTGCCGGGCATCTATGACCTCAATGGCTTTTCCGAAGATGAACGGGTGGTGCAACGTTTCCTTGCTAACTATGCCGTCAATTTAGTGGTGGTGGTGGTGAACGCTGCCCAAATTGACCGACAAATTCGTCTGCTCCTCCAGGTACAAACCCTAGGCATTCCGGCGATCACCCTCTTAAACCTGGCC…	MVSHCQRGSVQSSRPDVKKRVAFIGQPNTGKSTFFNRITKANAAIANWPGLTVDLFRAVVPLQGELIEFVDLPGIYDLNGFSEDERVVQRFLANYAVNLVVVVVNAAQIDRQIRLLLQVQTLGIPAITLLNLADEAKRYGVQIDVAALQERLGLPLYPISAKYGTGCSRAMDAIGRAVKDQPEAYQIPNLVNVLSDHPVAIADMETALAGVVQMPSPNARTLTNVIDGVMLHPVFGLPIFFASMFGVFWVIWHVGLPSADPVDAVTGWVQSNILEPLFSPLPTILQGLLLDGIWTGFAALLSFVPLVAIFFIVMGILEGSGYLSRAAYLMDALMGRLGLDGRSFVLQMMGFGCNVPAIMGTRVMRSRGMRLLSMLVIPFSLCSARLQVFVFILAAVMPG…	ferrous iron transport protein B	ferrous iron transport protein B
NC_000911.1:44948-46789:+	NC_000911.1	HRIBO	CDS	44948	46789	+	slr1494	SGL_RS02045		1842	614	Yes	0.402553	1.19305	0.797802	0.331915	1.40734	0.869625	4.73	6.18	11.75	5.18	11.75	5.18	3.9	7.29	ATG	TAG	AATTTTTTTGCTTCT	ATGCCACCTATCTATCAACTGCTTTGGCAGATGATCCGCTATGCCCAGAAACTTTATTGGTTGGATACCATATTGTGGCTATTTATTCTGGGAATACCCATAGTACCGGGACTGCTAATTCGTCAGTTTTTTGACACCTTAACCAGCCAAACCCAAATTAAGGAATCTCCCTGGGTCTGGATTGGCCTATTTTTAGCGGTGGGACTAGGCAGAATGGCGGCAATTTTTACTGGGCGGATCACAAAAACCCAACACCGCTTTTTGATGAGTGGATTGGTGCGCCACAACCTGTTCCAGGGATTATTGCATCGCCCTGGGGCAGAACTAGCCAGCGGAGCAGTGGACGGCCAGAAGGTTTCCCCTGGGGAAATGCTGAGCTATTTTCGCGATGATGCTCTA…	MPPIYQLLWQMIRYAQKLYWLDTILWLFILGIPIVPGLLIRQFFDTLTSQTQIKESPWVWIGLFLAVGLGRMAAIFTGRITKTQHRFLMSGLVRHNLFQGLLHRPGAELASGAVDGQKVSPGEMLSYFRDDALQIEDTVVGTNEIFAAGVFAVVSVALLLSVNREMTLLVFVPLCLITALAHHAEHRLKRYRRASRHGTQQVTGFIGEMFTAVQAIKVAGAETEMLEELRKRGDLRRRLMVRDQVFNAILNSGFENTVSIGTGLILLLAAQSLGPQGNFTVGDFTLFVYYLSFVSDFLAFFGVFLASVKQSEVSFERMAVLVNGGECPSPSTVNPTSFPLTYPHHLYLKPILGSQPALPPLSTPAQTDPLQELRVEGLVYHYPGSDNGIADISFSLQRG…	MDR (multidrug resistance) family ABC transport er	MDR (multidrug resistance) family ABC transporter
NC_000911.1:3196783-3198624:+	NC_000911.1	HRIBO	CDS	3196783	3198624	+	slr0535	SGL_RS16670		1842	614	Yes	0.593011	3.7724	2.1827	0.430432	1.44357	0.937002	54.64	139.39	92.14	36.95	92.14	36.95	39.66	53.34	ATG	TAG	TTCCCCGCATTTACT	ATGATCAAACGTTTTTTCCTCACCATTCTGTTCTTTGCTGGTCTGTGGTTTGCCCTCAATCTCTATCTCCAACACCATGGTTTGGCCCACCGTGGTAATTACGACAGCTTGATCATTAACTTCAGAAACGATATCCCCACCCAGACCCTGACGGCGGATATCCAAGCCATCGATGGCAAGTTAGAAAAAACGGTGGATTTTAATAGTATTTTCTCGATCAAAGATTATGTTTACACCGTTAAAGGCGATGGGGAAGATTTAAAACGGCTGCGGCGATCGCCTTTGATGAAGGAGGTGGACTACGTTGAACCCAACTATGTTTACCAAGCCCTAGAAGTGCCCAACGATCCTGAATACAGTAAGCAATGGAATCTCCGGGCGATCGCCATGGAATCGGCC…	MIKRFFLTILFFAGLWFALNLYLQHHGLAHRGNYDSLIINFRNDIPTQTLTADIQAIDGKLEKTVDFNSIFSIKDYVYTVKGDGEDLKRLRRSPLMKEVDYVEPNYVYQALEVPNDPEYSKQWNLRAIAMESAWDGSKGEGVTVAVIDTGVTRVPDLRQTQFVTGYNFVDDNRDTTDYNGHGTHVAGTIAQATNNEYGVAGIAPKAKIMPLKVLGDNGGGTVADIAEAIIYAADNGASVINMSLGGGGESKTLADAIDYAYSKGVVIIAAAGNEGQNAAAYPGRYPKVISVAATDATGNKADYSNYGAGVDIAAPGGSTDGKDGKILQETIDPDTREPVLMGFQGTSMAAPHVAGTAALIQSVQLQQAKVGLSTRAAENLTIAEVSEPEMVLKILKASA…	protease	protease
NC_000911.1:202554-204395:+	NC_000911.1	HRIBO	CDS	202554	204395	+	slr1104	SGL_RS02820		1842	614	Yes	0.33554	2.77677	1.55615	0.0893302	1.08631	0.587819	47.14	171.16	140.49	61.64	140.49	61.64	12.55	66.96	ATG	TAG	GATCCCAGATTCTCT	ATGAAGCAACACATACTAGTTCTAGAAGATGCCAATCAAAGAAGAACAATAATCTTAGACGAGCAACAGTATTCCATTGGTCGCCATTCTGGTACTAGCATCCAGATTCACTCCCGGCAGGCTTCCCGGCACCATGCCACCCTGATGCGGAAGACTAATAGTAAAACTAACGAAGAGTGTTTTTGGATTATTGATGGGGATCTAGAGGGCAATAAAAGTCAAAACGGCGTCTTTGTGAATGGGGAAAAACGCCTCATTCACGAGCTAAAAAATGGTGACCTGATTAATTTTGGCTGTAGCATCAATGCCAGTTACCACGTTACTGGAGAGGGGTTTGGGGAGTCTTCCTCCCAGCCAGTGGAAATATTGCCCCAGACTTCTCCCTATAATGAGGCGGTT…	MKQHILVLEDANQRRTIILDEQQYSIGRHSGTSIQIHSRQASRHHATLMRKTNSKTNEECFWIIDGDLEGNKSQNGVFVNGEKRLIHELKNGDLINFGCSINASYHVTGEGFGESSSQPVEILPQTSPYNEAVSAQIASSYNTREGVDLLAGSNDETFHEQSYLDTATDLPNQTLFLEYLNIALSNARRHHAQVGVLLCQINNWSDLKRKRGDAVANAFLQEAGQKLKSNLRNGDIVSRWDKDEFIFLVSKVQDTSSLLGIAQRLMKPVLAPVTAGGRPFQPEITYGVALYPVDGEQVNDLIGHIRENLQQLLPQPTNPGSGEADDHIETAVDVRIGAPQPVPGLSDSDQKRLAIVEKRLLRALEQHELELYYQPQINWRKKTIEAMEAFIRWQHPQKG…	hypothetical protein	hypothetical protein
NC_000911.1:434320-436158:-	NC_000911.1	HRIBO	CDS	434320	436158	-	sll0640	SGL_RS03935	Sac1	1839	613	Yes	0.908522	0.672417	0.790469	1.40255	1.10955	1.25605	156.72	70.16	172.5	104.34	172.5	104.34	241.94	115.77	ATG	TAA	TCTTTTGGGATAACT	ATGGCCTTTTTGCAAACCTGGCTGGCAGACTATCAAATTCCCCTCACTCTGGCAGTTATTGTTTTTGCGCTGGTGATGTTTGTGTTGGAGTGGTTACCCATCGACACCACCGCCATTCTGGTGGCTGTAATTTTAATGGTGTTGGGTTTGGTCACCCCCACGGAGGGGATTGCGGGGTTTAGCAATTCCGCCACCGTCACCATCATGGCCATGTTTATTTTAAGCTACGGCATTACCCGCACCGGCATTATCCAAATTATTCGCGATAGCCTGATCAAATTTGGCGGCGATAGTTTACGCAGACAACTTTTACTGATGGGGTTTATCGTCGGCCCCAGCTCTGCCTTTCTCAACAACACGGCGATCGTGGCGATCTTTTTGCCCATCATTGAAGAGTGG…	MAFLQTWLADYQIPLTLAVIVFALVMFVLEWLPIDTTAILVAVILMVLGLVTPTEGIAGFSNSATVTIMAMFILSYGITRTGIIQIIRDSLIKFGGDSLRRQLLLMGFIVGPSSAFLNNTAIVAIFLPIIEEWARQRQISVSKLLIPLSYATILGGMITLLGTSTNILASGLAEKLTGQGFSIFQFTPLGLLTFSVGLIYIVLAAPILLPARRNISDGNVAAEYQIKDYVSEIIIPPRSSLIGQTLRQSEIQRKFDIDVLEIIHNDTHFPQPLADRVLTMGDILLVRAGREDLLRIKDERGIEILADVQFVSAETNNAGPLESSEEKVAEVLILSNSRLIGSTLKDLRFRQRYNATVIAIRRGEELIRQRLGKVRLKFGDLLLLQGPRESFLGLQTTRE…	probable sodium/sulfate symporter	probable sodium/sulfate symporter
NC_000911.1:2080885-2082720:+	NC_000911.1	HRIBO	CDS	2080885	2082720	+	slr0442	SGL_RS11695		1836	612	Yes	0.525983	4.11274	2.31936	0.238095	2.33311	1.2856	77.43	120.75	147.21	29.36	147.21	29.36	35.05	68.5	ATG	TAG	AGTTGAAGATCAATT	ATGAATACTCGCTTTTTCCTCAATTTCCTCACTGCCCCCAAACGTAATGCCGGCTTTGCCATGCCCATGGTGATTATGGGCGGTTTGGTGATTACGGTGGCGGCCGCCGCTATTGCTATGAAGGGGATGAATGATCAAAATCAGGTCACAGCGAAGGCAGCTAAGTCCTCTAGTGACGCAGCAGCGGAGACCGGCTTAGCGCGTGTTCAAGGTTTGCTTGCAAGCAGTAAATATGCAGCTCTTTTCGACGATTCTGATTGGGCAACCTTAATACAGTCGGATGGAACACCAAACAGCGAAACTACCCTTGGAGCTGTTCTTGAAGAGCATCTAAATTCGGTATCAAGCAACAGTGGGTCTATCTGTAGTGAGGGGAGCTCTTCTGGCGTTGATTCGGCT…	MNTRFFLNFLTAPKRNAGFAMPMVIMGGLVITVAAAAIAMKGMNDQNQVTAKAAKSSSDAAAETGLARVQGLLASSKYAALFDDSDWATLIQSDGTPNSETTLGAVLEEHLNSVSSNSGSICSEGSSSGVDSAKLASQKQVLGKLRELATEASAGQVEPINSNSSFRIVSYKVGVEEENKGKIPQGQVIGRLVVEGVSSKGATDAVTRLMVDIPISGKPGTSTFGGSDTVPALWISEGGVDKGTAGDTVDTTGTPAVPKTGEIRGNIVLAGCGSTDLTDAYIDDLNSIQNAAGGFAAVRASTPMPSIPLSALASARSQNRVYTLNVGNNDSISLPRSGEQPVDGYYYYESSSLDRKFELNFDNTGGKKYRLYVTGDIGRNAEINGTCNTADGCQPTDIQ…	unknown protein	unknown protein
NC_000911.1:1281361-1283193:-	NC_000911.1	HRIBO	CDS	1281361	1283193	-	sll1703	SGL_RS07865	sppA	1833	611	Yes	0.188794	1.14535	0.667071	0.0747097	0.792636	0.433673	3.74	11.82	19.81	10.32	19.81	10.32	1.48	8.18	ATG	TAA	GCGCAACCAGGCCGC	ATGAAGAACTTTTTCCAACAAATGGTGGCTAGTTTCTTCGGAACATTGGCCGCCATTGTGGTTTTGCTTAGCCTTGGGGCCACTGGCTTGGTGTTGCTGTTCATACTGGTTTCGGCTGAGGCAGATCCAGTGCTAGAGGAAAAAACAGCCCTCATTCTCGACCTAGCGATCCCCATCCAAGATACCAGCCCTACTCTCAGTCTACAACAGAGTTTACTGGGTAATCAGGAAGAAATATTACCCCTGCGGACGGTGGTTAATGCCATTGAAAAGGCCGCCGAAGATGACCGCATTGTGGCCCTATTAATTGATGGTCGCCGCAGTAACCAAGTGGACGGTTACGCCAATTTAAGTGAAGTGCAACAGGCCCTAATTAAATTCAAACAATCGGGCAAAAAA…	MKNFFQQMVASFFGTLAAIVVLLSLGATGLVLLFILVSAEADPVLEEKTALILDLAIPIQDTSPTLSLQQSLLGNQEEILPLRTVVNAIEKAAEDDRIVALLIDGRRSNQVDGYANLSEVQQALIKFKQSGKKIVAYGLNYSELGYYLAATADTILINPMGGVEINGLGAQPIFFTGALAKAGIGVQTLRVGSYKGAVEPYTRENLSPENRQQQQLLLNQIWQIYLTSVANNRSLTVPQLQAIASDQGLLFADIALREKLVDKVTYWDEVLAELKQAGVWINDPEKIEEQEEDKEFRKISLAEYHRLQNWETENHDQDPKIAIVYLEGSIVNGRGTWENIGGDRYGELLRTIRQDDDIKAVVLRINSPGGSASAADIIWREVELLQAQKPVIISMGNVA…	protease IV	protease IV
NC_000911.1:947511-949343:-	NC_000911.1	HRIBO	CDS	947511	949343	-	sll1725	SGL_RS06320		1833	611	Yes	3.33972	1.20676	2.27324	3.31903	0.931398	2.12522	153.36	37.82	45.92	31.34	45.92	31.34	152.41	29.19	ATG	TAA	AAAAGTGATAGATAA	ATGAACCGTGCCTCCCCCATGACCCAAGCTGTGCCAGGCCTCTGGGCAGTGATCACCACCTTTTGGCCCCAAATTCGTGCCCAGTGGCGACTCTTGCTGGTAGCGATGGTGACTTTGCTGGCGGATGTGGGGTTGCGACTGTTGGAACCCTGGCCCCTCAAGCTGCTCATTGACGGGGTACTGATTCCCACTCAAACCCAGCCGAGTCTTTCTCTCTGGGGCTTTACTAACCTCAATGCCGCTTGGCTGTTGATGTTAATCGCCGTTGGGGTGATTATCATTGCCGTCAGTCGGGCGATCGCTACCTATTGGAATACCGTCAGTTTGGCGATCGTTGGTAGTCGCGTCATGGCCCAGGTGCGGGATCAACTCTATGGGCATTTGCAAAGGCTTTCCCTG…	MNRASPMTQAVPGLWAVITTFWPQIRAQWRLLLVAMVTLLADVGLRLLEPWPLKLLIDGVLIPTQTQPSLSLWGFTNLNAAWLLMLIAVGVIIIAVSRAIATYWNTVSLAIVGSRVMAQVRDQLYGHLQRLSLRYHYQARSGDLIIRVSSDANRLQEILLTAALPLVVSLLTLGGMVGVMAWLDLKLTLLSLATFPLFWLAANRLSAKIRHASLTQRHQEGAVASTAAESLSAIKLVQALSLEQAFADLFSRQNQRSLQENIETKRLAANLERLVDVLIAFGTALVMGYGGHLVIEDALTAGTVLVFLTYLRNAYKPVQNFAKYTGRLAKAAASGERILNILAETPDIQDKPGAIPAPFFQGRIEFKYVSFGYHPDQAILDGLNLTVRPGEKIALVGAS…	ATP-binding protein of ABC transporter	ATP-binding protein of ABC transporter
NC_000911.1:2105813-2107645:+	NC_000911.1	HRIBO	CDS	2105813	2107645	+	slr0280			1833	611	Yes	0.249736	2.31405	1.28189	0.0686088	1.04907	0.55884	11.83	44.8	47.37	19.36	47.37	19.36	3.25	20.31	ATG	TAA	TGGCAGAATGGCTCC	ATGGCCCTAGGGGATTTGCTGAAAATGGTTAATTGGACTAGAAATTGGTTTGGTTTTTCGTGCTTATTTGTTCTTACTCTGGCGGTAATGCTGGGGCTAAAACTGTTTTTGCCCAGTCCAGTGGTGGCCCAATCCTCTTCAGATTTTATTCAACAGGGCAATCAAATTAGCATTGACGGTAAATCCTATCCTGTGGCCTGGGGTCAATGGCAGGAGGGAGGCCAGACCCGCACCGGCCTTGGGGATACTGGGGCCATGCAGTTTCTAGGGCTAGATCTGCTTGATAACACCAGCCCCAATCAGCAACCTGTGCAATGGTTCAGTGGCGATCGCCAAACTTTAAACGCCCGTTTTGTCGCTCCCAATCGTTACCTGGATGTAACTTCCCTCTTGCAAGGC…	MALGDLLKMVNWTRNWFGFSCLFVLTLAVMLGLKLFLPSPVVAQSSSDFIQQGNQISIDGKSYPVAWGQWQEGGQTRTGLGDTGAMQFLGLDLLDNTSPNQQPVQWFSGDRQTLNARFVAPNRYLDVTSLLQGFGPLQAQGNTLVMPNTNAQILTVRDGRQSWGERVVLELSQPAFWQVSQAREEAVVTINASSTIGSQGNANAPGLQAIDQDDLGGKTSGGQQIRYRLERSGASSKVHFQLPVGYKLQVSTLTSPFRLVIDARADAPPVKTINWTEGITWQQRFVNISGGQFPVTTVTINPRSPGISLRPLMANPTMAQGTAPLVTIARDQRAAVAINAGFFNRNNQLPLGAVWSQQNWRSGPILNRGAIAWNDQGQTTFGRLSLSEIITTGSGQRLT…	hypothetical protein	hypothetical protein
NC_000911.1:2051479-2053305:-	NC_000911.1	HRIBO	CDS	2051479	2053305	-	sll1531	SGL_RS11590		1827	609	Yes	0.470178	3.132	1.80109	0.0650381	0.385265	0.225151	14.82	40.81	31.52	13.03	31.52	13.03	2.05	5.02	ATG	TAA	AGTGTTTAATCCCCA	ATGTTAGTTCCCCTTCTTGGTTTGGCGATCGGGTTTCTCCTGTTAACTTTTAGTCTTTTGGTTTACAAGGGAGTGACCATTGTCCAACGCTATACTTTCTTAGGCAAATTTGAAAATAATGTGCTTTTTATTTGGGGGAATATTTCCATTTCCCTAGCTGCGATGCTGGGTATTGCTGGTTATTGGAATGTTTTTCAGGGGGACGATCTACGTTTGGGGAGAATTGTTTTGTTCCTCGTCGGAATAATAGCTACGAGCTGGTCAATACTCGAAACACTGGATATTAATCACCCTCTGAAGAAATTTGCTGTTGCGGAAAAGATCAAAAAAATAGGGGTGTTAAATATTATTGGCTACATTCTTAGTGGCGCGGCAGTTCTAACCTTAATTTCTATTTTT…	MLVPLLGLAIGFLLLTFSLLVYKGVTIVQRYTFLGKFENNVLFIWGNISISLAAMLGIAGYWNVFQGDDLRLGRIVLFLVGIIATSWSILETLDINHPLKKFAVAEKIKKIGVLNIIGYILSGAAVLTLISIFGIAFFDYNYGGDAFMYHIPFAARIWGIIPPEQYTFEYFTENRFLGFPLLANWLQGLFWVVFNRIEATNLVSYFSLIILIVYLVKVPKIPFYLASLSLLAVPMIHMHAARSYIDLPGNVGVSICILTLYLLYIHKVKLNLKTISILFLSAFVAANIKLQLIPVVFLLILCSLPLFVINYWQTDKTRQANMLKLAQVFALGTLASLIIFYNPIKNIVLYQNPAYPVKITIVGQVLNHTEESPNFMHEKIRRLPPPVRWGQSLLEINAF…	unknown protein	unknown protein
NC_005229.1:85552-86997:-	NC_005229.1	HRIBO	CDS	85552	86997	-	MYO_RS16965	SGL_RS00400		1446	482	Yes	1.48046	1.39833	1.43939	1.60429	1.62482	1.61456	1510.94	1710.94	1020.59	1223.56	1020.59	1223.56	1637.32	1988.07	ATG	TAA	ATTTAGAAACAAAAA	ATGAAGCCTAAGTTTATGACAACCTCGCCTAATCAGACCCTCTACCAAACGGTAGCGGATCAAATTCATGGACTGATTAGCGAAGGGACTTTCCAGCCAGGCGATCGCCTACCATCGGTGCGAAAATTACATCAGCAGTGGTCAGTAAGTATTTCAACAGTCTTGGAAGCTTATCGCCTACTTGAGGATCGAGGATTAATCGAAGCTCGTCCCCAGTCAGGCTACTTTGTCAAAACCATATTGAATTTCCTACCCGACGAGCCTAGTCCCAGCACACCTCAGTCTGCCGATAATCCTGTTGATACGTCTTTAGCCTTCCGTGTAAATAATTCAATGTTGAAACCTGGAATCATTGGCTTAGGGGCGGCGATCGCTGGTAGCAATCTTTTACCTATAGCT…	MKPKFMTTSPNQTLYQTVADQIHGLISEGTFQPGDRLPSVRKLHQQWSVSISTVLEAYRLLEDRGLIEARPQSGYFVKTILNFLPDEPSPSTPQSADNPVDTSLAFRVNNSMLKPGIIGLGAAIAGSNLLPIATLNRLMGQVIRAKPEVTHRYSSPQGCEELRHEVARRLIDTGCSITPDQIVITNGTTEALYLSLKAVTKPGDTVVIESPTYHLLLETLEALHLRILELPTHPQHGISLIHLEDALKNDQISACVLIANFSNPLGSCMSDSKKKQLIGLINHYNVPLIEDDIYGDLNFTGNRPKSIKSFDTQGLVLYCSSISKTLSPGLRIGWAVPGRYQTKVEQLKMTTNYMTAVAPQLTIAAFLANGGYDRHLRKLRRTYQAQMMDMTQAICNYFP…	PLP-dependent aminotransferase family protein	Derived by automated computational analysis using gene prediction method: Protein Homology.
NC_000911.1:622300-624123:-	NC_000911.1	HRIBO	CDS	622300	624123	-	sll1833	SGL_RS04790	ftsI	1824	608	Yes	0.745708	4.05525	2.40048	0.38802	1.62121	1.00461	39.09	126.97	52.42	31.31	52.42	31.31	20.34	50.76	ATG	TAA	TAAACAATTCGAGCC	ATGGACTCCTCCCACCCAAAACTAAATTCTTCAACTGCCAATTCATCTCCCTTTACCAAGCATATTTCCCGTCAGGAAAGGCACAGACAAAAAACCCAACAACAGGGGGTGCCGGTAGTGCGCTTGCTTTTGGTCTGGGGGTTTTTATTTGTAGCCATGGGAGGGCTTGCTTATCGTCTTTACCGGCTCCAGGTGGTGGAAGCTAACCAACTGCAACGCATGGCCAAGGCTCAACAGAGCACCAGCATGCAACCCTACGTGCCCCGCCGTTCCATTGTGGACAGCCAGGGTAATGTTTTAGCCACCGATCGCCTAACTTATACTCTGTTTGTCCATCCCCGTTACTTTGAAGCCACCAAGGAAATTACCGATCCCACTGACTACATTGCCAGGGAACTA…	MDSSHPKLNSSTANSSPFTKHISRQERHRQKTQQQGVPVVRLLLVWGFLFVAMGGLAYRLYRLQVVEANQLQRMAKAQQSTSMQPYVPRRSIVDSQGNVLATDRLTYTLFVHPRYFEATKEITDPTDYIARELSAILGDITPAQLKEKFKEKESGIKLATGLNESQAVRIGSLRMGGVDLEKQYSRYYPQDEMAADVVGYVDGEHQGQAGLELSQREILEREVETYAIRRTGKGVVLPDSLPDNLLQSNDWQVQLTIDMRLQRAARELLKAQVAQQKAKRGTVLVMDAQDGAILAMVNEPTFNPNEYYKAKVEYFKNWSVSDLYEPGSTFKPVIVALAMNEGVLKPEDRINDSGSVRVGPWTISNASKSGAGMINITQVLRYSSNVAMVAIARRLKPER…	penicillin-binding protein	penicillin-binding protein
NC_000911.1:1192485-1194308:+	NC_000911.1	HRIBO	CDS	1192485	1194308	+	slr1855	SGL_RS07425		1824	608	Yes	0.475979	8.26991	4.37294	0.0592105	0.535348	0.297279	62.22	314.67	130.72	38.05	130.72	38.05	7.74	20.37	ATG	TAA	CCGTGGCATCAACAT	ATGAGTCCCAAAATTAACTTTCCTTTTTCCGATCTGATTGCAGGTTATGTGACAAGTTACGACCAAGAAGCGGATATTTTTGGTCTGAAAACCTCCGACGGCCAAGAGTTTCAGGTCAAACTTAGTCCCATGGCCTACGCCAAAGTGATCCAAAACTTTGATGAAGGTTATCCCGATGCCACCGGCACTATGCGGACTTGGTTAACCCCAGGGCGATTTCTCTACGTTTACGGCGTTTTTTACCCTGATACGGCTATTTTTGACGGGAAACAGGTGGTCTTTGCAGGCAAAAAGCCAGCGGAATACGTGTTTGAGAAACAGGATTGGTGGATTAAACAGGTAAACTCCCTCGGTAAGTTTTTTATCAAAGCCCAATTTGGCGACGGGGAGATTGATTAC…	MSPKINFPFSDLIAGYVTSYDQEADIFGLKTSDGQEFQVKLSPMAYAKVIQNFDEGYPDATGTMRTWLTPGRFLYVYGVFYPDTAIFDGKQVVFAGKKPAEYVFEKQDWWIKQVNSLGKFFIKAQFGDGEIDYRHYRTDLSMSGERSTVNFRQETDTISRLVYGFATAFMMTGDDQFLEAAEKGTEYLREHMRFVDKDEDIIYWYHAIDVQGEKEQKIFASEFGDDYDAIPAYEQIYALAGPIQTYRCTGDRRILHDAEQTIKLFDKFFLDKSEYGGYFSHLDPLMLDPRSESLGPNKARKNWNSVGDHAPAYLINLWLATGEQKYADMLEYTFDTIEKYFPDYDHSPFVQERFYEDWSHDTTWGWQQNRAVVGHNLKIAWNLMRMNSLKSKEKYVELA…	unknown protein	unknown protein
NC_000911.1:36721-38538:+	NC_000911.1	HRIBO	CDS	36721	38538	+	slr1488			1818	606	Yes	0.184848	1.95951	1.07218	0.172727	1.51822	0.845473	1.22	4.84	6.6	2.47	6.6	2.47	1.14	3.75	ATG	TAG	CCATCATCTTGATTT	ATGCTCCTTTCGCCCCAGTCTAATCGACAAGTTTTAATGGCTTATCTAAGTCCCCAGTGGGGGCAAGTGCTGGCTTTGGCGATCGCCTTGGGGGGAAGCATTATCCTACAAGTGCTTAATCCCCAGATTTTGCGCTATTTCATCGACACAGCCATGGCCGGAGGGCCCCAAACCATACTGGTGTGGCTAGCATTGGGCTTTATGGCGATCGCCGTTGTACGTCAAGGATTGGAAATCGTTGCCACCTATTGCAGTGAAACCGTTGCCTGGACTGCGACCAATAATCTCCGCTTGAACCTAGCTCGTCACACCCTCAATCTCGATCTAACTTTTCACAAAAATCATTGCCCCGGGGAACTAGTGGAACGCATTGATGGAGACGTGGACGCCCTGGCCCGC…	MLLSPQSNRQVLMAYLSPQWGQVLALAIALGGSIILQVLNPQILRYFIDTAMAGGPQTILVWLALGFMAIAVVRQGLEIVATYCSETVAWTATNNLRLNLARHTLNLDLTFHKNHCPGELVERIDGDVDALARFFSQFVLQVLGNGLLVVGVLVVLWFEQWQAGLGLTLFALVALGILSRLQSLAVGPWQVYRGISADFYGFITEYLAGLEDIRGNGAVDYVMNRFYTLIRNWLRAFHQARLQSTLLWGSTVGLFTVGNAIALALGAYLWRVQGITIGTVYLLFYYASLLQDPIERIREELEQFQQAVASLYRIQDLIRQSPSPRLGRSQALPSGSLSVEGKNVWFSYPTTASLKPGDGNHELPEHRQGHHHEDADYALQNLTWHLPAGKVLGLLGHTG…	multidrug resistance family ABC transporter	multidrug resistance family ABC transporter
NC_000911.1:1393938-1395755:-	NC_000911.1	HRIBO	CDS	1393938	1395755	-	sll1151	SGL_RS08420		1818	606	Yes	0.236639	1.27387	0.755256	0.281176	1.93634	1.10876	7.97	21.21	33.68	16.65	33.68	16.65	9.47	32.24	ATG	TAA	ATCCCATCCCCCCCT	ATGTCAAAGTCCAAGTCCTCCGGGCATCGTTTTTCCCTGCTGATGTTACTGCGTCTACGCCGTGGCTTTACGAATAATTTAGATTTGACCGATGAACATAAGGTGCAAATCTACACCCAGTTATGTGAGTCCGTTAGCCTCAGGGACATAAGCTACTGGATTGAGGTTTTGTTTGCGGCGGGCATTGCCACCCTGGGGTTGGTACTGAACAGTCCAGCGGTAATCATTGGAGCAATGTTGATTTCCCCTTTGATGGGGCCAATTTTGGCCAATGGCATGGGTTTGGCGGCGGGAGACGTGGTGCTCTGGTTGCGGGCGGCGTTTAACTTATTACTGAGCTGTAGTTTAGCCATCGTTTTTGCAGCCATTCTGGTGGTCATAGTCCCTTTTAAGGAAATT…	MSKSKSSGHRFSLLMLLRLRRGFTNNLDLTDEHKVQIYTQLCESVSLRDISYWIEVLFAAGIATLGLVLNSPAVIIGAMLISPLMGPILANGMGLAAGDVVLWLRAAFNLLLSCSLAIVFAAILVVIVPFKEITPEILARTNPTLLDLIVALFSGAVGSVATCKQAKGVAASLPGVAIAVALMPPLCVVGYGIGIYFSLASSQGLTVAKGGGLLFITNLVAIIFTAMIVFFFVHFDVRAVREAIGEWKQENAESQVVSSWLRRLPAYTTFQRVGGLPSRFFLILVTLGIISFPLTKSLEQVRRQVTQQREENQLNSTIKQIWQDNFDGGDDEFRSYIDQVKAKRDNNQVSIQLQVVTDKLYSQEDEDRFVDKLATALDLSPSDITLRFVQIPTSQAVNT…	unknown protein	unknown protein
NC_000911.1:1811746-1813557:+	NC_000911.1	HRIBO	CDS	1811746	1813557	+	slr1983	SGL_RS10415		1812	604	Yes	0.616703	3.00795	1.81233	0.144282	0.989205	0.566743	19.79	52.94	32.09	17.6	32.09	17.6	4.63	17.41	ATG	TAA	TAAGTTCTTTAATAA	ATGATGAATCCTTCTATTAATTCAGTTGATATAGAAAGTGCCACCGCTTTCATTCGTCACGAGCTCAGAACTCCCATTAATGCGATTGTCGGCTATGGGGAAATGGTTCAAGAAGAGTTAGCAGAAGCCAATTCTCCCCTTACAGAAGAAATAGATACATTACTGGTGGAAGCACAGAAGTTACTTGAAATTATCAACCTATTTGTTAAGCATTCTGACGGAGAGGATAAGTCGGATTTTCAGAAGCTTTTTTCCACCATTCCTCACAGCACTAATTTTTCCATTACTAACATCATTCTTAACTGCGATAGTTTGCTCGAAGCAGAGGAATGCACCAATGAACTTGAACTTACTGAAGATATAAGAAAAATAAAATTAGCGGCCTTACGCTTGCAGGGC…	MMNPSINSVDIESATAFIRHELRTPINAIVGYGEMVQEELAEANSPLTEEIDTLLVEAQKLLEIINLFVKHSDGEDKSDFQKLFSTIPHSTNFSITNIILNCDSLLEAEECTNELELTEDIRKIKLAALRLQGLVNNIESIFTNFLESLNPGNGTGLSPDFIFPSSSNTNEISLGNIKTNGVDSRELLKGKILVVDDNPSNLDLFFQHLTRKGHAVTTCLSAKDALGLLQSQNYDLILLDLLMPETNGDQFLEYLKTSVEFQHIPVIIVSALDEFESIIRCIEMGAEDFLPKPFDPVLLKARIGSSLEKKRLRDQEKLYTQQVEGLSEMMAKELEKGRQMQKNFLPAHLLTRSGWEFSAYFSPAQQLAGDFYDLFELPGDRLGIVVADVCDKGVGAALF…	two-component hybrid sensor and regulator	two-component hybrid sensor and regulator
NC_000911.1:2891201-2893012:-	NC_000911.1	HRIBO	CDS	2891201	2893012	-	sll0078	SGL_RS15335	thrS	1812	604	Yes	0.470971	3.10558	1.78827	0.155417	1.5408	0.84811	36.91	115.31	78.37	37.13	78.37	37.13	12.18	57.21	ATG	TAG	TTGTAAACACAATCC	ATGGCCAAAACCGTAGTTTCCCCCGATACCATTGCCCTTCCCCGTACCAGTGAGTCGGAGCAACTAAAAAAAATCCGCCACACCACTTCCCACGTCATGGCCATGGCGGTGCAGAAACTTTTTCCCAAAGCCCAAGTGACCATTGGTCCCTGGACGGAAACGGGGTTTTACTACGATTTTGATGTGGCAGAACCGTTTACAGAGGCAGATTTAAAGGCCATCAAAAAAGAGATGGTGAAAATCATCAATAAAAAATTGCCAGTAATTCGAGAAGAAATTAGTCGGGAAGAGGCTAAACAAAGAATTGAATCCATCCAAGAACCCTACAAATTAGAAATCCTCGACAGCATCCACGAACCCATCACCGTTTACCATCTGGGGGATCAATGGTGGGATCTT…	MAKTVVSPDTIALPRTSESEQLKKIRHTTSHVMAMAVQKLFPKAQVTIGPWTETGFYYDFDVAEPFTEADLKAIKKEMVKIINKKLPVIREEISREEAKQRIESIQEPYKLEILDSIHEPITVYHLGDQWWDLCAGPHLESTADINPKAIALESVAGAYWRGDANKAQLQRIYGTAWETPEQLAEYQRRKEEALKRDHRKLGKELGLFIFADPVGPGLPLWTPKGTIIRTILEDFLKQEQIKRGYLPVVTPHIARVDLFKQSGHWQKYQEDMFPMMAESPEEAAQEMGFVLKPMNCPFHIQIYKSELRSYRDLPLRLAEFGTVYRYEQSGELGGLTRVRGFTVDDSHLFVTPDQLDEEFLSVVDLILTVFKSLQLKNFKARLSFRDPESDKYIGSDEAW…	threonyl-tRNA synthetase	threonyl-tRNA synthetase
NC_000911.1:1585209-1587020:-	NC_000911.1	HRIBO	CDS	1585209	1587020	-	sll1425	SGL_RS09270	proS	1812	604	Yes	0.482772	3.26091	1.87184	0.235078	1.54101	0.888046	51.28	156.23	106.22	47.91	106.22	47.91	24.97	73.83	ATG	TAA	TTACCTAGGCTCATT	ATGCGACTGTCCCAGATGCTCTTTGTCACCCTCAGAGACGATCCAGCGGATGCGGAAATCCCCAGTCATAAACTTCTGGTGCGGGCCGGTTTTATCCGTCGTTTGGGCAGTGGTCTATACGCCTACTTACCTCTGATATGGCGGGTGCTAGAAAAAGTGAAGCGCATTGTCCAGGAAGAAATGAATCGCACCGGGGCCCAGGAGTGCCTATTGCCCCAGCTACAGCCGTCGGAATTGTGGAAAATGTCAGGACGGTGGGATACCTACACAGAGTCCGAAGGAATTATGTTTGCCCTCCGGGATCGACTAGAACGGGAACTTGGTTTGGGCCCCACCCATGAAGAAGTAATCACGGCGATCGCCAAGGAAATGATCCGTTCCTATCGTCAATTGCCGGTG…	MRLSQMLFVTLRDDPADAEIPSHKLLVRAGFIRRLGSGLYAYLPLIWRVLEKVKRIVQEEMNRTGAQECLLPQLQPSELWKMSGRWDTYTESEGIMFALRDRLERELGLGPTHEEVITAIAKEMIRSYRQLPVNLYQIQTKFRDEIRPRFGLMRGREFIMKDAYSFHSDEASLKATYGAMDQAYRNIFSRCGLDFRPVDADSGAIGGSGSQEFMVLADAGEDEILYTEDGLYSANVEKAVSLAPDAKPSPFSGYKKQSAPNTATIAKMCQCLDCDASNVVKNVLYQAVYNSGKAVLVLVSIRGDQEVNEVKLTNELTKLAPHYESTNILSLTVPDEKEQQKWAAKPLPLGYISPGISDDYIATNKQVADKFLRLVDQTAVDLTNFATGADAVDYHVTGA…	proline-tRNA ligase	proline-tRNA ligase
NC_000911.1:3564838-3566649:+	NC_000911.1	HRIBO	CDS	3564838	3566649	+	slr0604	SGL_RS18350	lepA	1812	604	Yes	0.10572	0.905373	0.505547	0.0540763	0.386574	0.220325	78.22	258.14	739.88	285.12	739.88	285.12	40.01	110.22	ATG	TAG	ATTGCCCTGCCCCCC	ATGACCGACGTCCCCGTTAGCCGCATCCGCAATTTCTCCATCATTGCCCACATTGACCACGGTAAATCCACCTTGGCCGATCGCCTGTTGCAGGTGACAGATACGGTGCAACAACGGGAAATGAAAGAGCAGTTCCTGGACAATATGGATTTGGAGCGGGAGCGGGGCATCACCATCAAGCTCCAGGCCGCCCGCATGAATTACAAGGCTAAGGACGGTCAGGATTACGTACTTAACCTGATTGACACCCCGGGCCATGTGGACTTTTCCTATGAAGTTTCCCGTTCCTTAGCCGCCTGTGAAGGGGCGTTGTTGGTGGTGGATGCCTCCCAGGGGGTGGAAGCCCAGACGTTGGCAAACGTTTACCTAGCGTTGGATAACAATCTAGAAATTATTCCC…	MTDVPVSRIRNFSIIAHIDHGKSTLADRLLQVTDTVQQREMKEQFLDNMDLERERGITIKLQAARMNYKAKDGQDYVLNLIDTPGHVDFSYEVSRSLAACEGALLVVDASQGVEAQTLANVYLALDNNLEIIPVLNKIDLPSAEPDRVAAEIEEVVGLDCSDIIQASAKAGIGVDDILEAIVQQVPPPADTVDQPLRALIFDSYYDAYRGVVVYFRVMDGQVKKGDKVRLMASDKEYVIDELGVLSPTQVQVEALHAGEVGYFAAAIKAVADARVGDTITMANSPAAEPLPGYTEANPMVFCGLFPIDADQYPDLKDALEKLKLNDAALSYEPETSSAMGFGFRCGFLGLLHMEIVQERLEREYNLDLITTAPSVIYRVTTTDEEVIEVDNPSLLPPIQ…	GTP-binding protein	GTP-binding protein
NC_000911.1:813799-815604:+	NC_000911.1	HRIBO	CDS	813799	815604	+	slr1149	SGL_RS05640		1806	602	Yes	0.416392	1.14189	0.779139	0.344324	1.07774	0.71103	8.84	15.13	21.23	13.25	21.23	13.25	7.31	14.28	ATG	TAA	ATCATTTCTTTCTCC	ATGACCCCGTCCCCTGCTGCTCCCCCGTCTGATAATGATTGGCGCTTGTTATTGCGTCTGCTTCCTTACGTCAAGCGCTATCCCAAGGAACTGGCGGCGGCGTTAGTTTTACTGATTCCTGTGGCTTTTTCTGGAGCAGTGCAACCCCTAATCATTGGGCAAGCAGTTTCCCTGTTGCGGGAGGAACCAGCCTGGGGCTTTTTGGATGCCATGCCATTGGATAGGGCCTTACATACCCTAGTGATTATCTTGGCAGTCACCATTGTCATTCGGTTGCTATTTTTGGGGTTACAGGGCTTTATTGTGCAAAAAATGGGGCAGGAAATTACCGCCGATGTGCGTCAGGATTTATTTGAACATGTCACTTCTTTGTCGGTAAACTTCTTTCACCGTACCCCT…	MTPSPAAPPSDNDWRLLLRLLPYVKRYPKELAAALVLLIPVAFSGAVQPLIIGQAVSLLREEPAWGFLDAMPLDRALHTLVIILAVTIVIRLLFLGLQGFIVQKMGQEITADVRQDLFEHVTSLSVNFFHRTPVGRLVTRITSDVEALGEVFASGAIGVVSDIVSILAIIVTIFWVQWQLALLLVGMLVPVTVLIIYFQQQYRKANYQAREELSRLNSQLQENVAGINVVQLFRREELNSRSFRRVNEKYRRAVDKTIFHDSAVSATLEWISLVAIAGVLGLGGWLILRDNLEFGVLAAFILYGQRLFNPLRQFADKFTMFQSGFTAIERIGELMEEPVEIKDQAVITPIEINGALRGSHGEICFENVWFGYKPDEYVLKNLNFTIKPGEKVALVGPTG…	ATP-binding protein of ABC transporter	ATP-binding protein of ABC transporter
NC_000911.1:3333244-3335046:+	NC_000911.1	HRIBO	CDS	3333244	3335046	+	slr0657	SGL_RS17290	lysC	1803	601	Yes	0.383947	2.79004	1.587	0.270356	1.05015	0.660253	26.5	74.55	69.02	26.72	69.02	26.72	18.66	28.06	ATG	TAG	TATCCCGAAATCACC	ATGGCATTAATCGTTCAAAAATTTGGCGGCACTTCCGTTGGCACTGTGGAGCGTATTCAAGCGGTGGCCCAACGCATTAAACGAACTGTGCAGGGAGGCAACTCCCTGGTGGTGGTGGTGTCGGCCATGGGAAAAAGCACCGATGTGTTAGTGGATTTAGCCCAACAGATTTCCCCCAATCCCTGTCGCCGGGAGATGGATATGTTACTTTCCACCGGGGAACAGGTATCCATTGCTTTGCTGAGTTTAGCCTTGCAGGAAATAGACCAGCCCGCCATTTCCCTCACCGGAGCCCAGGTGGGCATCGTCACCGAGGCCGAACATAGCCGGGCCCGCATTCTAGAAATTCGTCCCGATCGCCTGGAGCACCATTTAAGGGAAGGGAAAGTGGTGGTAGTG…	MALIVQKFGGTSVGTVERIQAVAQRIKRTVQGGNSLVVVVSAMGKSTDVLVDLAQQISPNPCRREMDMLLSTGEQVSIALLSLALQEIDQPAISLTGAQVGIVTEAEHSRARILEIRPDRLEHHLREGKVVVVAGFQGISSVEHLEITTLGRGGSDTSAVALAAALKADFCEIYTDVPGILTTDPRLVPEAQLMAEITCDEMLELASLGAKVLHPRAVEIARNYGIPLVVRSSWSDEPGTKVVAPPVQNRSLVGLEIAKAVDGVEYDADQAKVALLRVPDRPGVASKLFRDIAQQQVDIDLIIQSIHDGNSNDIAFTVVKDLLNTAEAVTSAIAPALRSYPEADQEAEIIVEKGIAKIAIAGAGMIGRPGIAAKMFKTLADVGVNIEMISTSEVKVSCV…	aspartate kinase	aspartate kinase
NC_000911.1:773827-775626:-	NC_000911.1	HRIBO	CDS	773827	775626	-	sll1913	SGL_RS05480		1800	600	Yes	0.409919	1.8208	1.11536	0.237227	0.806116	0.521672	13.72	29.77	33.47	16.35	33.47	16.35	7.94	13.18	ATG	TAG	TTTCCCAGAAACATT	ATGGCCATTGCAACAAAATCTATTGCCCGATTGACCACAGATATTTTGGTGGTGGGAGGTGGCACTGGGGGCACGGCGGCGGCGATCCAGGCGGCCCGACGAGGAGTAAAAACCATCCTTGTTAGCGAAGGGCCCTGGTTGGGAGGTATGTTAACTTCCGCTGGAGTGTCTGCTCCCGACGGCAATGAATTGGCCGCTTGGCAAACGGGGCTATGGGGAGAGTTTTTAAGGACTTTGACGGTCCAACAACCCGGGGGTTTAGACCATAGCTGGGTGAGTTTATTTACTTTTGATCCCCGTCTAGGGTCCAAAATCTTCGCTGATTGGGCGGCAGAGTTGCCTAATTTAACTTGGATTGCCAATCAATGCCCCATGGAAGTGGTAAAAAATGGCGATCGC…	MAIATKSIARLTTDILVVGGGTGGTAAAIQAARRGVKTILVSEGPWLGGMLTSAGVSAPDGNELAAWQTGLWGEFLRTLTVQQPGGLDHSWVSLFTFDPRLGSKIFADWAAELPNLTWIANQCPMEVVKNGDRLVGVRFPDYEIRARVILDGTELGDLLALGDIGHRWGWDWQDKFDEPSCPIAPNEMTEEYPIQSPTWVFLLRKTTNNQTNIIAEPTIDVAQDFTHTWQNYGEKDFLTYGQLPGEHYMINWPIAGNDYGKDLNRLLGGEKEKQTYLKEAYQYSYAYAYYLQKHHSENLELATGIFPQTGDISTAFALHPYYRESRRLKGQQVITERDILPQGQVASLPIYNQKVTSIGVGNYANDHHYPGYEFPLTPKSLIWGGRWTGTPFTIPFPAL…	hypothetical protein	hypothetical protein
NC_000911.1:1472149-1473948:+	NC_000911.1	HRIBO	CDS	1472149	1473948	+	slr1720	SGL_RS08775	aspS	1800	600	Yes	0.772141	6.23544	3.50379	0.23676	2.71329	1.47503	34.7	125.27	44.94	20.09	44.94	20.09	10.64	54.51	ATG	TAG	TTGATTAACACCTCT	ATGCGTACTCATTATTGCGGCGACCTACGGACAACCCATCTGGGGGAGACAGTGACCCTCTACGGTTGGGTCGATCGCCGTCGGGATCATGGTGGCGTAATTTTCCTTGACCTGCGCGATCGCCAGGGCATAGTGCAAATCGCCAGTAGTCCTGACCAAACCCCCGCTTCCTATCCAGTGGCGGAAGGATTACGTAATGAATACGTGGTGCAAGTTACCGGTGTGGTCAGTAAACGTCCCCCGGAATCATTGAACGAAAAAATTCCCACCGGGGAAATTGAGATCTATGCCGACAGCATTATCTTGCTCAACGGCGTCAATCAACAATTACCTTTTGTGGTGTCTAGTCACGAAGCAGAACAGGTGCGGGAAGATGTGCGCCTTAAATACCGTTATCTA…	MRTHYCGDLRTTHLGETVTLYGWVDRRRDHGGVIFLDLRDRQGIVQIASSPDQTPASYPVAEGLRNEYVVQVTGVVSKRPPESLNEKIPTGEIEIYADSIILLNGVNQQLPFVVSSHEAEQVREDVRLKYRYLDLRRARLSQNLQLRHQVVKAMRRFLEDQENFLEIETPILTRSTPEGARDYLVPSRVNPGEWYALPQSPQLFKQLLMVAGMDRYYQIARCFRDEDLRADRQPEFTQLDMEMSFMGQEEILDLNEALICHIFKVVKNIDLPRPFPRLTYQESMAKYGNDRPDTRFGLELVDVSDLLGNTGFKVFSAAVSSGGSIKAIRVPGGNETISNVRIKPGGDLFKEATEAGAKGIAYIRVRDNGEIDTIGAIKENLDEAQVKTLLQLTQAEAGD…	aspartyl-tRNA synthetase	aspartyl-tRNA synthetase
NC_000911.1:2788450-2790246:+	NC_000911.1	HRIBO	CDS	2788450	2790246	+	slr0914	SGL_RS14850		1797	599	Yes	0.366327	2.60373	1.48503	0.297872	2.16935	1.23361	3.96	30.75	10.81	11.81	10.81	11.81	3.22	25.62	ATG	TAA	TTACGATCAATTTGT	ATGATTAACTTTTCCGAAAACAGGACTACCAATTATTTCAAGCACTTCAATATTCAGTTTATTTTTCCTTATCTTTTTATTATTTCCCTTGTATTTTTTTCTCGTTTTCTTTTCATTAATGATTTTGGACTTTACGAAGATGATTGGGCATTTAGTGGTACAGCTATCTCAAATAATTTAGCTCAAAACTGGATTAGGCTTAGGGCTTCCTTTGGTAGTTTTTGGCAGGGTCGTCCACTCCATATGACTTTTCTTACCTTTATCCCCTTTATCGGGGCAAAACTCGGAGGAATTAGGGCCCTATATTTAATTGGATTTACGATTTTAAGTTTAAATGCTTGTCTTTGGTATTCTTTATTAAAAAAAATTACAAAAAATAAAAATGTGGCAATCATTGCT…	MINFSENRTTNYFKHFNIQFIFPYLFIISLVFFSRFLFINDFGLYEDDWAFSGTAISNNLAQNWIRLRASFGSFWQGRPLHMTFLTFIPFIGAKLGGIRALYLIGFTILSLNACLWYSLLKKITKNKNVAIIASLLFVLYPADTTFGLLQHLIGIQTALLFLLIAFHVYVSSSEKHKLNYFRKPISYVFATLSLLDYESLFLIFLTAPLLNHPKSTKKEKLYHFLTLTIILAIYLFLRKLAGESRISGITGLQLIQKVVYQVFWGPLIAFYSFFKRPIEVISSPRVENIIIFCIGLILFFIVLRYLFNKQFLQNDIPADLNTFQEFWKLSGTGLLMTILGYSSALLLSVHDINGRASRVHFSAALGITLILACIWGIAFYITRVHKFWHTLLILLLSVY…	unknown protein	unknown protein
NC_000911.1:2076547-2078340:-	NC_000911.1	HRIBO	CDS	2076547	2078340	-	sll1521	SGL_RS11685		1794	598	Yes	0.817865	6.61153	3.7147	0.202436	0.924386	0.563411	14.1	69.95	17.24	10.58	17.24	10.58	3.49	9.78	GTG	TAG	CAGGGTTAGTTAACA	GTGGGAATCCATGCAAAACTGGAGACAGTCCAACTACCGTTGTTGGTCAGTTGTCTTTTCCCTCCCCTCACCATGCCTGCCAAAGACGTTCAAATCTGCCCGATCGCCGTTGACACCACTGTGTTTCGCTCCCGCACCTGGGACAGGTTGAAGTTTGAAATTGAGTATGGTTTGCAACGGGGCACCACTGCCAATAGTTACCTGATCAGTGCTGATAAGATTGCCCTCTTTGACCCGCCGGGGGAATCCTTCACCGATAATTTTGTCGGCACCCTAATTCAACGGTTAGACCTCAACAGCCTGGATTACGTCATTTTGGGCCACGTCAACGCCAACCGGGCCCATACCCTGAAGCTTTTGTTGAGCCTAGCTCCCCAGGCAACCATTATCTGCTCTAAC…	VGIHAKLETVQLPLLVSCLFPPLTMPAKDVQICPIAVDTTVFRSRTWDRLKFEIEYGLQRGTTANSYLISADKIALFDPPGESFTDNFVGTLIQRLDLNSLDYVILGHVNANRAHTLKLLLSLAPQATIICSNPAAQNLEKLLADAEVNNPIQVMKGNDHLDLGRGHELTFIPTPSPRYPGQLCTYDPRTEILFTDKLFGAHVCGDQVFDEGWTIYQEDRRYYFDCLLAPAAAQVSAALNKLEAYPAQTYAPSHGPLVRYGLRELTRNYQQWLSEQQAQALNVALIYASAYGNTSTLAQAIARGITKAGVAVTAINAETSNAEEIKEAIGKSAGFIFGSPTLGGHAPTPIQTALGITLANASKTQLCGVFGSFGWSGEAIDMLENKFRDAGFSFGFDTI…	flavoprotein	flavoprotein
NC_000911.1:1576765-1578552:+	NC_000911.1	HRIBO	CDS	1576765	1578552	+	slr2105	SGL_RS09230		1788	596	Yes	0.306567	2.29907	1.30282	0.223412	1.88795	1.05568	8.59	27.29	28.02	11.87	28.02	11.87	6.26	22.41	ATG	TAA	CGCATCACATCACCT	ATGGCTCGGCTTACTGCTCTATTTCGGACTTACGGGAAATATGCCTTCTTACCGGCGATCGCCTTTGGCTTGGCGGGGGGCATTGCCCTAGGGGTAACCGGGGTAATGAGTAAGTTATATCTAGGTTTGATGGCCATAGCAGTGATTTTTTTCTTCCTCTGGTGGACCTGGCTTTGGCAAAGATCCCAAGGTTTTCTCGGCCGGCGATCGACCCAATCTAGCGCTAACGTGATTGCCTCCACCCTAGCGGTGTTGGCGATTTTAACCCTCATTAACTACATTGCTTTTCGTTATCCTGTCGCCTGGGATTTGACCGAAAATCAACGGTTTACCCTCGCCCCCCAAAGTCAGAGCTTAGTGGCAGAGCTGGAACAACCCCTCAAAGTCTGGATTTTCGAC…	MARLTALFRTYGKYAFLPAIAFGLAGGIALGVTGVMSKLYLGLMAIAVIFFFLWWTWLWQRSQGFLGRRSTQSSANVIASTLAVLAILTLINYIAFRYPVAWDLTENQRFTLAPQSQSLVAELEQPLKVWIFDDAPSEKDRRLLQNYQRFSDQFSFEFVHPDRRPKLVQDFNVQNKGDVFIEYGDKKQLVQNLLSFQQREDLSEIQLTNAIAKAQRQEIPQVYLVQGHGELPLNNEPRGISTAVTALENLGVTVQPLNVVTDGGIPEDADAVVIAGPTRKFLAPEIATLKQYTDQGGNLLVMVSPEADAGLEDLLEPWGVSFDPRLVIDLSGAGGVFGLDPTVPIFNRYGNHPITQKLQGAIAIFPLVRPVATKEQPHIQATTLVEASDLMYATQLISE…	hypothetical protein	hypothetical protein
NC_000911.1:2670115-2671902:-	NC_000911.1	HRIBO	CDS	2670115	2671902	-	sll0603	SGL_RS14335	menD	1788	596	Yes	0.428288	3.42242	1.92535	0.163832	0.682511	0.423172	15.11	38.16	35.28	11.15	35.28	11.15	5.78	7.61	ATG	TAA	ATTTGAGCGTGGGCC	ATGGTTGATTTCACTAACCCCAATACCCTGGCCGCCTCTGTGTTGGTGGAAACCTTATTTCGATTGGGACTCCAACAAGCGGTGATTTGTCCTGGTTCCCGTTCCAGTCCTTTGACGGTGGCTTTGGCCCGCCATGGGGGCATTGATTGCGTTGTTAGTTTAGATGAACGTTCCGCTAGCTTTTTTGCCTTGGGCCATGGCAAACGCACAGGGCAACCAGTGGCATTGGTGTGTACTTCCGGAACAGCGGCGGCCAATTTTTTGCCTGCCATTATTGAAGCCCATTACAGTCAGGTACCTTTGTTGGTTCTAACCGGCGATCGCCCCCCCAGATTACGTCATTGCCGGGCCGGGCAAACCATTGACCAAACCAAGCTCTATGGCCACTATCCCCAGTGG…	MVDFTNPNTLAASVLVETLFRLGLQQAVICPGSRSSPLTVALARHGGIDCVVSLDERSASFFALGHGKRTGQPVALVCTSGTAAANFLPAIIEAHYSQVPLLVLTGDRPPRLRHCRAGQTIDQTKLYGHYPQWQTELALPEPNMDYCHYLRQTALHSWQKCFWPGLGVVHLNCPFDEPLVPLEHARESLQHLAEEFSKEHFYRGLTTFTTMNRGEAISLPVNFSIFSFPSPQLDFSPLGLILVGVMPGGETPSLLTDILAIARGLGYPVLCDALCSLRNYDDGQTALITNYDFLIRCPRWAEQLVPEQIIQIGELPTSKALRHWLGTIDCPRYILNFHGENLDPLQGQTIYLSASVAQVAEYIHNQGFIPDAEQKNYAHSWLEKQRQSQTIIISALADA…	menaquinone biosynthesis protein MenD	menaquinone biosynthesis protein MenD
NC_000911.1:164037-165821:-	NC_000911.1	HRIBO	CDS	164037	165821	-	sll0219	SGL_RS02635		1785	595	Yes	1.23069	9.32972	5.28021	0.294377	2.93406	1.61422	36.33	103.28	29.52	11.07	29.52	11.07	8.69	32.48	ATG	TAG	TTCGAGGTTAAATCC	ATGATTTCTCCAATTGGTGGTCTTTCCCAAGCTTTGCATAGTCCGTCAGATTCAATTTTCGTTGCTTCCCTGCCTCGGGATATTCAGGTTGCGGAAATTGCCCCTCAAACCAAAGTGTTACGGTCTCGCCTCTGGGATCGACTTAAATTTGAGGTGGAATATGGTCGCCGTCGGGGCACTACTTCTAATTCCTATCTGATTCAGGCCGACCATACGGCATTGATTGATCCTCCGGGAGAGTCATTTTGTGATTTGTATCTAGCGGAATTACCCAAATATTTGGATTTAGCCCAGCTTGACTACATTGTTGCAAGCCATGTTAATCCCAATCGCATGGTTACCCTGGAGCAATTACTGCGTCGGGCAACCAAGGCCAAGCTTATTTGTTCTCGTCCTGCG…	MISPIGGLSQALHSPSDSIFVASLPRDIQVAEIAPQTKVLRSRLWDRLKFEVEYGRRRGTTSNSYLIQADHTALIDPPGESFCDLYLAELPKYLDLAQLDYIVASHVNPNRMVTLEQLLRRATKAKLICSRPAAKVLKATFPHWEERFQTVRSQDMLDLGRGHKLQLMTLPTPRWPDGLCAYDAGSQILFSDKLFGTHVCGDAIFDEDWRQLGGDRRFYFDCLHAPQTRQVETALDQFDPLTLKMIAPGHGPLVRFSLSRLYSDYRQWCQQQPSQTLKVALIYASAYGNTATMARAIAQGLVKAGVAVETINCEIAEPNEIVEAIQACDGFIVGSPTLGSHAPVQIQTALGIVLSSATKTKLAGVFGSYGWSGEAIDLIENKLKDGGYRFGFEAIRIQF…	flavoprotein	flavoprotein
NC_005230.1:27605-28630:-	NC_005230.1	HRIBO	CDS	27605	28630	-	sll7029	SGL_RS00750		1026	342	Yes	5.45054	8.685	7.06777	3.84353	5.79774	4.82064	2612.66	3555.03	479.34	409.33	479.34	409.33	1842.36	2373.19	ATG	TGA	TAAGGACAATTTTCC	ATGACCCCAGTTCAGCTAAAAAACTACCTGGAACAACTAGTTGGCAACCAAATTAAAACCAGCACCATGATTTGGGGGCCCCCTGGTATTGGTAAGTCCAGCATTGTGGCACAAATTGCTGAAGAAGGAAAACTGAGGTTCATTGACCTGCGGCTGAGTCAACTAGCACCGACGGATCTACGGGGTTTGCCCGTTGCCATTCCCACTAGCAAAACTAAGCCCCAGACAGGGACTTCTGCTTGGTATCCACCGGAATTTTTACCTAAAGATGGAGCTGGTATTCTCTTCCTCGATGAATTAAATATGGCCCCACCAGCTATGCAAGGGGTAGCCCAACAGTTAATTTTAGATCGTCGGGTGGGTAGCTATGAAGTACCAACGGATTGGTTTATCTGGGCG…	MTPVQLKNYLEQLVGNQIKTSTMIWGPPGIGKSSIVAQIAEEGKLRFIDLRLSQLAPTDLRGLPVAIPTSKTKPQTGTSAWYPPEFLPKDGAGILFLDELNMAPPAMQGVAQQLILDRRVGSYEVPTDWFIWAAGNRKEDRASVFEMPAPLANRFLHLDVQPDFESFKQYALEQKYHEQVIAFLSFRPGLIHKLDLQRPAWPSPRSWAIANGLHQVNLDVSPAVGEGCAAEFSAFVQLYKDLPDLEAIFRGQGQNIGFPTEPSSGYASTIGLAVRAKDATAGVNAFHWLTDKADSEWVQLFVTDMAGQLRRAGHLGALSIMAKKEPKLKQFMQGYQELLAI		ORF_ID:sll7029_hypothetical protein
NC_000911.1:761482-763263:+	NC_000911.1	HRIBO	CDS	761482	763263	+	slr2019	SGL_RS05425		1782	594	Yes	0.208518	1.67333	0.940925	0.208518	1.788	0.998259	17.92	37.65	85.94	22.5	85.94	22.5	17.92	40.23	GTG	TAG	GTCTTTGCCGACTCT	GTGACTAAACCCATTGCCCCCCTCCTCAGCCTTTTAAATTACAGCCGGGTCCACCGTGCCAAAATTTACTGGGCGGTAACCTGCTCATTGCTGAACAAAATTTTTGATCTGGCTCCCCCGGCCCTAATTGGTTTAGCCGTGGATGTGGTGATCAAACAGCAGGATTCTTTCCTGTCCCGTTGGGGCATTGTTTCCGTACAAAGCCAACTGTTGGTGCTGACGGTGGCTTCGGCGGTTATTTGGGCCCTGGAATCAATTTTTGAGTATGCCTACGAGCGGCTTTGGCGTAACCTCGCCCAGGATATCCAACACGATCTGCGCCTGGATGCCTATGCCCATTTGCAACAGCTAGACCTGGCCTATTTCGAGGAAAGGAGTACGGGGCGGCTGATGGCCATT…	VTKPIAPLLSLLNYSRVHRAKIYWAVTCSLLNKIFDLAPPALIGLAVDVVIKQQDSFLSRWGIVSVQSQLLVLTVASAVIWALESIFEYAYERLWRNLAQDIQHDLRLDAYAHLQQLDLAYFEERSTGRLMAILNDDINQLERFLDVGANEILQVLTTVVVIGGAFFVITPDIAWMAVVPMPFVLLGSIYFQSLLTSRYALVREKVSNLNSRLSNNLSGIMTIKSFATEAEEVERLRQDSDAYRDSNQRAIALSAAFVPLIRVIIFAGFSTILYFGGLDAVRGNLAVGSYSMLVFLTQRLLWPLTGLGKTLDLYQRAMASTQRVMQLLATPIQAHPGELSLHPSQVQGELVFQNISFAYPHRSAVLKNVSLRVPAGQTIGIVGATGSGKSTLVKLLLRL…	ATP-binding protein of ABC transporter	ATP-binding protein of ABC transporter
NC_000911.1:1159029-1160804:+	NC_000911.1	HRIBO	CDS	1159029	1160804	+	slr0891	SGL_RS07285	amiA	1776	592	Yes	0.463984	2.23324	1.34861	0.323398	1.02332	0.673361	9.34	30.64	20.13	13.72	20.13	13.72	6.51	14.04	ATG	TGA	CGGGAATTTTTTGCA	ATGATGGCAATGGAATCTTGGTTGGGAACAATGATTGGTGTGGGGGCAGCGGTGGTTTTCACTATGCCGGCTGTAGCCCAAAGTCAGCCCTTATTTTTGGCCTATCCACCCCAAAATCACCAAACCAGTAGCCCGACGATTTTTTTCATTGGTTCTGCCGCTCCAAATGTGACCGTTACCCTCAATGGCCAGCCCATTGAACGCAGTGCCCAAGGCAATTTTGCCCCTGTAATCCCTCTCAAGATGGGGGAAAATCAGTTTGTTTTTCAAGCAGAGTCCCAACGGATTGAGCGTACCATTACCCGCATTGGCACTGGCCCCACATTGTCCCCCCAAGGTGGTTTTGCCGCCGGCTCCCTCACCCCCGCTGTGCCCATTAGTCGTCCTGCTGGCGAACCA…	MMAMESWLGTMIGVGAAVVFTMPAVAQSQPLFLAYPPQNHQTSSPTIFFIGSAAPNVTVTLNGQPIERSAQGNFAPVIPLKMGENQFVFQAESQRIERTITRIGTGPTLSPQGGFAAGSLTPAVPISRPAGEPICFTAIAPTDAMATVTLAGQTIPLTPQGNVVQLPPNNTILHGENQPQVTAADQYKGCQSFNVTNLPAQLGTPQFNLQWRGQNFSTPGPGSVTLLNGDRPQVIVVTSQTGVARTGPGTDYSRLTPLPQGSQASVTGQDGDWLRLDYGGWIKADETRTLPSQAPPRSLIRSVGYQVFGDRTEMRFPLQLPVPVTVHQTEMGLTLSLYNTTAQTDTIRLDNDPIIRNLTWQQISPDRIDYYFTFKTDQQWGYDLRYEGTTLILSLRHPP…	N-acetylmuramoyl-L-alanine amidase	N-acetylmuramoyl-L-alanine amidase
NC_000911.1:1102283-1104058:-	NC_000911.1	HRIBO	CDS	1102283	1104058	-	sll1275	SGL_RS07035	pykF	1776	592	Yes	0.814884	6.91913	3.86701	0.212403	1.53215	0.872275	52.56	171.11	64.5	24.73	64.5	24.73	13.7	37.89	ATG	TAG	TAATTTCAGCCCATT	ATGCAAACGTCTCCCCTTCCCCGTCGTACCAAAATCGTCGCTACCATTGGCCCCGCGACCCAAAGCAAGGAAGTGCTGAGACAACTGATCCAAGCCGGTGCTACCACTTTCCGCCTCAATTTTTCCCACGGAGACCACGCTTACCACCAACAAAGTATCCGTTTGATTCGCCAGATTGCCTTTGAACTGAACCAACCAGTGGGCATTCTCCAGGATTTACAGGGGCCAAAGATTCGGGTGGGCAAATTTCTCAATGATGCCGGCTCTGTGCAACTCAAAAACGGTGATCCCTATACCCTCACCAGTCGCCCGGTGGAATGTACGGAAACCATTAGTTCCATTAGCTACGAATATTTAGCCGACGAAGTACCTTCTGGGGCAAGAATTTTGCTCGACGAC…	MQTSPLPRRTKIVATIGPATQSKEVLRQLIQAGATTFRLNFSHGDHAYHQQSIRLIRQIAFELNQPVGILQDLQGPKIRVGKFLNDAGSVQLKNGDPYTLTSRPVECTETISSISYEYLADEVPSGARILLDDGKLEMLVEEVDTVARDLHCRVIVGGTLSSNKGVNFPGVCLSVKAMTDKDKEDLMFGLDQGVDWVALSFVRNPQDIDEIKGLIAAAGKSVPVIAKIEKHEAIKDMQAVLEKCDGVMVARGDLGVELPAEDVPILQKKLIATANRLGIPVITATQMLDSMVNSPRPTRAEVSDVANAILDGTDAVMLSNETAIGKFPVEAVAIMAKIAERIEQEDINPSQAEASRTSIPNAISSAVSQIAETLNAAAIMSLTKTGSTARHVSKFRPKT…	pyruvate kinase 2	pyruvate kinase 2
NC_000911.1:506252-508027:-	NC_000911.1	HRIBO	CDS	506252	508027	-	sll1009	SGL_RS04265	frpC	1776	592	Yes	3.2186	11.0616	7.14012	0.558376	1.8315	1.19494	740.47	895.44	230.06	80.95	230.06	80.95	128.46	148.26	ATG	TAG	TAGAGGTTAAGTACT	ATGGCTCTCATTAACGGAACGAATGGCAACGACAACAATACATTCGCCGGTCTTTTTGATTTCAGGCCAGCCTTGATTGGATCGATTGACTTATCATTGTCTCCTCCGTTTGTCGATAGTGATATAGATGATGTCATCAACGGCAAAGCAGGAAATGATATTCTTGTCGGGTTAGGAGGGGATGACATCCTGGATGGTGGCACAGGCGCTGATATTATGTTCGGCGGTTCAGGTGACGACACTTACTACGTTGATAATACGGGCGACAAGGTCGGTGAGGCGAGTGCTGGTGGTGGCATGGACTCCGTTATATCGTCTGTGGATTATTCTCTAAATACTGGGCCGTTCTACTTGCCTGCCATCAATGGGTTGGTAAACAATGGAGCGGCTTTGGCCACG…	MALINGTNGNDNNTFAGLFDFRPALIGSIDLSLSPPFVDSDIDDVINGKAGNDILVGLGGDDILDGGTGADIMFGGSGDDTYYVDNTGDKVGEASAGGGMDSVISSVDYSLNTGPFYLPAINGLVNNGAALATLGATKYAAYLFLSEPLTRPELTPTFIENLTLTGTAIIGEGNDLDNIIDGNGENNVLSGLGGNDTIRGLGGNDTISGGEGNDLLNGNMGEDSLNGNVGDDTVRGGQGNDIVRGGQDNDSLYGDLGNDSVFGDLGNDTLYGGDGNDVLDGGTDPGGADTDTADYGTVQDPVVLPRSITLKGAGDLTLTVEKGPLGSLGIDTLLNIEEVIADGSVDNNTIDFSGADLGITINVDLGMQSILISGASSPQSLVKVVNFDNVIGTIGNDII…	unknown protein	unknown protein
NC_000911.1:611057-612832:+	NC_000911.1	HRIBO	CDS	611057	612832	+	slr1908	SGL_RS04720		1776	592	Yes	0.601048	3.68426	2.14265	0.27372	2.07093	1.17233	165.15	643.53	274.77	174.67	274.77	174.67	75.21	361.73	ATG	TAG	GAGGATCCCTTTGTT	ATGAATAAGTTGACCAGTCATTTACTGAAATTATTTCCGTTGGCCCTAGGTAGCTCCTTGGCTATTGTTCCCGGCGCCATGGCCCAGTCCACAGGTGAATTGGCCACCCCTGGAGATTTCCCTAGAATTAGTAATCAGGGTGACAGTCTGGAACTGATGCGTCGTCGTCAGAATGCCGGTACCTTCAATGCGGCTACCCCAGATATCACCGACATGTCCCAGGTAACTAGTGTGTCCGAGTTGCGGGATGTGCAACCCACCGCCTGGGCCTATGAAGCATTAAAAAGTTTAGTAGAACGCTACGGTTGTATTGTTGGTTATCCTGACCGGACTTTCCGCGGCGATCGGGCCCTTTCCCGTTGGGAATTCGCCGCTGGTTTGAATGCTTGTATGAACGTG…	MNKLTSHLLKLFPLALGSSLAIVPGAMAQSTGELATPGDFPRISNQGDSLELMRRRQNAGTFNAATPDITDMSQVTSVSELRDVQPTAWAYEALKSLVERYGCIVGYPDRTFRGDRALSRWEFAAGLNACMNVMERLIQENVAVLREDIDKLKRLMQEFEAELAALGARIDNLETRTSFLEDHQFSTTTKLNGVAVFALVDQWGGDKAVDWRQQDNIDNFGAAAPAPVEENATLSSRVRLNFDTSFTGKDLLRTRLQAGSVPNLSGPTGTNMARLSFDGSSPDNNVDINKLFYRFPMGNLTTWIGGTGLALDDVFKTYNPYLESGDSGALSRFSRYSPFVNRGPEGTGGALRYKFNDVFTVSAAYLADTGQASTPSDDVFTSGGNTFRSGNGFFNGSYS…	probable porin, major outer membrane protein	probable porin, major outer membrane protein
NC_000911.1:1138702-1140474:+	NC_000911.1	HRIBO	CDS	1138702	1140474	+	slr0880	SGL_RS07175		1773	591	Yes	0.234656	1.94258	1.08862	0.202844	1.25598	0.729413	6.27	24.36	26.72	12.54	26.72	12.54	5.42	15.75	ATG	TGA	GGGCAAGAAATCATT	ATGCAAGCTGTTGATTACACTACCCTGATGGCCATTGTTGCTGAACTCCAAGGTGATTGGCTACCCGCCCGCATCGAACAGATTTATCAGCATGATCGCCATGGTTTATCCCTCGCTCTGCGCACGTTAGAAAGACGGGGTTGGCTAACCCTAGCTTGGCATCCCCAGGGGGCAAGAATTTGTTTAGATCCTCCTCCGCCCCAGGAACCGGACACGTTTACTTTTAGCGATCAACTGCGGCATCAGCTTAAAGGACTGGCCTTAATTTCTCTCAAACCCCTACAGCCCTGGGAACGGGTCATTGACCTGGCGATCGCCAAACGGCCAGGGGATGAACCTCTATACCATTTGTTTTTGGAGGTGATGGGCAAATATAGCAACCTGATTTTGACCGATGCC…	MQAVDYTTLMAIVAELQGDWLPARIEQIYQHDRHGLSLALRTLERRGWLTLAWHPQGARICLDPPPPQEPDTFTFSDQLRHQLKGLALISLKPLQPWERVIDLAIAKRPGDEPLYHLFLEVMGKYSNLILTDAQRQIITVAHQVNSQQSRVRTVQTGQPYQSPPALLATPPSLTESFSSWQERVQLIPGLLSKQLLKSYRGVSPMVVKNLLGQADLDSQVSNQDLTDEQWQNIFIAWQNWLQRLEKLDFLGKSLPQGYIVLAETTVVNDVKPTQEEGDRPLLPINKLVSEYYRRELGRENFQQLQHQIQQKLNNLIAKLQQKADTFKQRLNAAANAQQYQRQADLLMAYLHQGQPGLSSITLPDFDDQSPVTISLQPDKTLIQNAQRLYKQQQKLNRAE…	similar to fibronectin binding protein	similar to fibronectin binding protein
NC_000911.1:266702-268471:-	NC_000911.1	HRIBO	CDS	266702	268471	-	sll1665	SGL_RS03120		1770	590	Yes	0.658449	3.97913	2.31879	0.351191	1.63672	0.993956	47.81	131.55	72.61	33.06	72.61	33.06	25.5	54.11	ATG	TAG	CTTTGGAGACATTAC	ATGGAAACTTTATCTTTGGTGTTGGCGGTAATCATTGGGCTAGTCGTTGGTTTTGCCGGCACCTATTTCACCCTGGTTACCAAACTTCAGAAAAAGTTGGATAGCACCAAAAGCAAACTGGGCCGTGCCAAAAGTGCCAGTGAAGATACCGAAACTCTCCAATTTCAGTTGGAAGCCCAAAAAGCCGAAACCCAAGCCCTCCAAGCTAGATTGGAATCTCTGGAGTCCAGCCATCGTAACCAGTTAGACGAGCTTCAAACAGCCCAAGCGGCGGCCCTGGCCCAGTTGACGGCAGAAAAAACAGCTTTGGAAGATGAGCTCCAGTCCCTCAGGGAAAGTGGGCCGGCAGAAGAACAACGGCCCCTCGACCAGAGTGATGAAGTTGCCGCCCTGCAAGCT…	METLSLVLAVIIGLVVGFAGTYFTLVTKLQKKLDSTKSKLGRAKSASEDTETLQFQLEAQKAETQALQARLESLESSHRNQLDELQTAQAAALAQLTAEKTALEDELQSLRESGPAEEQRPLDQSDEVAALQAQLLAMEQEHQARVQALQNQYQAEIESLQQAQPSVEEQEEPLAEEESFDADVAPPAIAEFTEVPGEEFIPAAEPVAEFMEATVTEETPEIAEITPEQEENWVDAPPTAELETEPLDYQGPVGEPMVEEETFSPFDAPPTETTEVEAEADLENWVDAPPEASLPDMDFGGGEENFEPMDLATELPDINDEGITNPGQQLAELSSVETPEAAETEQSSDQFLAELTEEQSAPELPLFSETPAETETLGELEDLGDDLSFTSDSGDDLNL…	unknown protein	unknown protein
NC_000911.1:442164-443933:+	NC_000911.1	HRIBO	CDS	442164	443933	+	slr0692	SGL_RS03965	ycf45	1770	590	Yes	0.242485	2.3787	1.31059	0.17809	1.52657	0.85233	18.15	102.95	74.85	43.28	74.85	43.28	13.33	66.07	ATG	TAG	GCCCTTACCATCATA	ATGTCGGAACTTAGCCTGGCCCATCAGGATTACCCCGTTGACGACCTCGAACAATTATTAAGTATTCTGCCCAAACCCATCCAAGCCATCATCGCCGAACACCCCCAGCGGCAACAGTTAGTGGAAGTAGTCATGGACCTAGGGCGCTTACCGGAAGCACGTTTTCCCGGCACTGCAGTCTATTTGGGCCATGAACCGATCGCCAAGGAGGATTTACAGTACGCCATTGACCGGGTAGGGCTATTTAGCAGTGATAACCGGGCTGGCATTGAAAGGACCCTGCACCGCATCAGTGCCATCCGCAACCGCACCAACGAAATTATCGGCTTGACCTGTCGGGTAGGCCGGGCGGTGTTCGGCACCATTAACCTCATCCAAGACCTGGTGGAAACAGGGGAA…	MSELSLAHQDYPVDDLEQLLSILPKPIQAIIAEHPQRQQLVEVVMDLGRLPEARFPGTAVYLGHEPIAKEDLQYAIDRVGLFSSDNRAGIERTLHRISAIRNRTNEIIGLTCRVGRAVFGTINLIQDLVETGESLLLLGRPGVGKTTALREIARVLADDLHKRVVIIDTSNEIAGDGDIPHPAIGRARRMQVARPELQHQVMIEAVENHMPEVIVIDEIGTELEALAARTIAERGVQLVGTAHGNRLENLIKNPTLSDLVGGIQAVTLGDEEARRRGSQKTVLERKAPPTFSMAVEMLERQKWTIHSDVALTIDNLLRGRPPVEQLRYMNEQGELQIETVEAQPQERTPQPPPYFSLGLVDDRQLRPRPTGLRSTGRMKPQAPLHANADQVRDFERLLE…	hypothetical protein YCF45	hypothetical protein YCF45
NC_005230.1:28850-29353:-	NC_005230.1	HRIBO	CDS	28850	29353	-	sll7030	SGL_RS00755		504	168	Yes	4.12571	2.22114	3.17343	5.8694	9.27599	7.5727	1805.41	1510.91	437.6	680.24	437.6	680.24	2568.45	6309.9	ATG	TAG	AAATAATAGAGATTG	ATGGTGTTAAAAATTGAACTTCTTGATAGTCGTATCCATCAGCGCTCAGACTTTTACTGTGGAGAAGCATCTCTGGATACCTATATCCAAAAACAAGCTTCCCAAGACCTAAAAAGAAAAATTGCAACAATATTTGTCCTAGTTGATAATCTAGATAAAAAAGTGTTGGGCTACTACACTCTTTCAGCTTATACTGTCAACATTGCTTACTTAGAAACCGACTTTGCTAAAGGATTGCCCCGTTATCCCATGCTACCTGCAACCCTGTTAGGACGTTTAGCTGTTGACCAAAACTACAAAGGCCAGGGACTAGGTGAACTATTATTAATTGATGCCTTAAAAAGAGCTTGGGAAACCTCTCAATTAATTGCTTCCCTTGCCGTCATAGTGGAAGCCCTC…	MVLKIELLDSRIHQRSDFYCGEASLDTYIQKQASQDLKRKIATIFVLVDNLDKKVLGYYTLSAYTVNIAYLETDFAKGLPRYPMLPATLLGRLAVDQNYKGQGLGELLLIDALKRAWETSQLIASLAVIVEALNDQASNFYIKYGFVPFNQQPSKLYLAMKSVERLF		ORF_ID:sll7030_hypothetical protein
NC_000911.1:61834-63591:+	NC_000911.1	HRIBO	CDS	61834	63591	+	slr1114	SGL_RS02125		1758	586	Yes	0.653408	7.84315	4.24828	0.482905	3.52511	2.00401	29.24	126.51	44.75	16.13	44.75	16.13	21.61	56.86	ATG	TGA	TTCGCCGTCACTGCC	ATGATTAATTTTTTCTCTACCCATATCGATCGCCTGGGGGATTGGTATCCCCAACTGTACCGGGAACTCAAAAGCCGTTTCACTGCTACTAAGGTCCGTTGGTTGCTGTTGGTTAGCGTAATTTTCCAGGGTGTGATGGTATTTTTTCGCACCGGAGAAATTCCCGTACTGTATCCCCTCAACCCCGCTGGCGAGCAATTTAGTCGCTACTGTCTGGGCACCCCACCGGATTGGGAATATAGCCGAGGCATTTTTGTTTGCACCCAGGATTTATTGGGACAACTACAAATTAATTGGCGGCTTTGGTGGCTGGATGGCTTCGCTTTTTTGAGCTTGGCCGGGCTGGCTTTATTGCTGGTGGCGGGGGTTTATTTGCTGGTGGCCGATTTACAAAAGGAA…	MINFFSTHIDRLGDWYPQLYRELKSRFTATKVRWLLLVSVIFQGVMVFFRTGEIPVLYPLNPAGEQFSRYCLGTPPDWEYSRGIFVCTQDLLGQLQINWRLWWLDGFAFLSLAGLALLLVAGVYLLVADLQKECQRGTLNFIRLSPQGEGNFIWGKMLGVPSLLYGFLLTLLPLHIVAAGGAGISLLLLAGYYAVVLAGATFFFHIALWIGLSSNAKSYSLSKSAAIAGLCGVGTLIATTLIMQDNDWEPFFLSWLSLFYPGKALIYLVRSTFLPITTVGYLGPNELDQLRWYGWDLFRSAPLGMGFMVANFAVGTYWIAQVLRRRFRRPLSTAWSKVQSVGVTLSLVAIANGFLLQSYVKGDYLDSLLLNLASWQLTLCCFFLGLTLALCPQINYLRD…	hypothetical protein	hypothetical protein
NC_000911.1:271600-273357:+	NC_000911.1	HRIBO	CDS	271600	273357	+	slr1798		pleD	1758	586	Yes	0.299521	1.48961	0.894564	0.22401	1.66786	0.945935	22.53	62.34	75.22	41.85	75.22	41.85	16.85	69.8	ATG	TGA	CCTATACTTACTCTA	ATGTCGGGTGCTATACCACAAGGCCCTCGACGAATTGACACACTGAAGCGTCGGGAAATTTTAGGCTGTGGGGGCAGTGCAATTATGGCCAGACAGGATTACTGGGCTCCGATTCATCGTCATGAACTGGTTCGCTGGATTAAGGGCAGTGGCAGTGCGAGTTTTTGGCAGAATCCCCTCCTACATAATATTCTTTTAAATCTTCTGGTAGCTCTGTTTTATGTTGTAGGAATTAGGCTGAGCGACCAGTTAGTTAGCACTCTATTGCCGGGAAGAATTTCCCCTGTTTGGTTTCCTTCTGCCCTCACCTTTGGTGTGTTTTTTCACTTTGGTCATTGGGTTACCCCCGGCATTATTCTTGGCTCAGTGTTGGGTTTAGTTTCAGTACTTTCTACCTTT…	MSGAIPQGPRRIDTLKRREILGCGGSAIMARQDYWAPIHRHELVRWIKGSGSASFWQNPLLHNILLNLLVALFYVVGIRLSDQLVSTLLPGRISPVWFPSALTFGVFFHFGHWVTPGIILGSVLGLVSVLSTFDPPPSIAQFLVLETAFAFANTLQPFIGDLWLKNKLISVAQKESVTIIKDSDSIQEPLAILNPFQRVSTTLAFVQGAIIGPFLSAVIGVTTLLLMGIIARENFFYSWITWWSNSVLAIIVFTPVLINIRFYHFRRHHFFNTKLVISLVLTFLVWFLSFYHSFPVAYMFLPLILFVVFHFGDFFASIFVAFFAFFAIFATAQGQGLFNQDSGNNSIIFLQLFTAVISMTALFFSAIIQEKKIAQQSLSRAVKNLENEVQKRTDKLAAA…	unknown protein	unknown protein
NC_000911.1:1220473-1222230:-	NC_000911.1	HRIBO	CDS	1220473	1222230	-	sll1770	SGL_RS07550		1758	586	Yes	0.372656	2.22952	1.30109	0.190736	1.83648	1.01361	30.01	67.22	80.53	30.15	80.53	30.15	15.36	55.37	GTG	TAA	TTTCTTTGTATCAGT	GTGTCTGCCCTATCCACTAAGCTTGAGCCCACAAATTCCTATTCTGAATCTCTGCCCCCCCAACGGCGATCGCCCCTAGAAGCGGAGGGTCGGTATCGCTGGAATCGGGGTAACTATTCCATCACCCGGCGGCGCATCGATATTTGGGGCTTTGTGTTGACATTGCTGTACCAATTCTGGTTAAACGGCAAAAAGTGGAGCTATGCCGGAGGTTACACGGAAGAAAAACTCCAGCAACGGCGGCGGCGTCAAGCCAAATGGATTCGAGAAAATTTGCTTAGCCTTGGTCCTACCTTCATTAAAGTGGGACAGTTATTTTCCACCCGTTCCGATTTGTTTCCAGCGGAATATGTGGAGGAACTGTCCAAGCTTCAAGATGAGGTGCCCGCCTTTAGCTAC…	VSALSTKLEPTNSYSESLPPQRRSPLEAEGRYRWNRGNYSITRRRIDIWGFVLTLLYQFWLNGKKWSYAGGYTEEKLQQRRRRQAKWIRENLLSLGPTFIKVGQLFSTRSDLFPAEYVEELSKLQDEVPAFSYEQAAGIIEEELGKPIAKLYRSFDPVPLAAASLGQVHKAQLHTGEDVVVKVQRPGLKKLFTIDLAILKKIAQYFQNHPKWGRGRDWNGIYEECCKILWQETDYLREGRSADTFRRNFRGEDWVKVPRVYWRYTSTQILTLEYLPGIKISHYDALEAAGLERKELAQLGARAYLFQLLNHGFFHADPHPGNLAVSPEAGELIFYDFGMMGEITPDTKNKLMDTLFGVAEKNAERIVNSLVALGALKETEDMGPIRRSVQFLLDNFMDK…	hypothetical protein	hypothetical protein
NC_000911.1:2078366-2080120:-	NC_000911.1	HRIBO	CDS	2078366	2080120	-	sll1520	SGL_RS11690	recN	1755	585	Yes	0.838879	2.51613	1.6775	0.2662	1.71712	0.991661	4.79	10.14	5.71	4.03	5.71	4.03	1.52	6.92	ATG	TAA	ATTGGCTAATTTTTC	ATGCTACTATCCCTGCGGATCAATAACTTTGCTTTGATTGATTGCTTAGAAATTAACTTTGGGCAAGGCTTGAATGTATTGACGGGGGAAACCGGCGCCGGGAAATCAATTTTGCTTGATGCGATTGATTTATTACTAGGAGGAAAGGCCGGAGCGAGGGTTTTGCGCCAGGGGTGTTCCAGCGGTGTGATTGAAGGAATTTTTTCCACCAGTACCGAGCTTAATGATTGGTTAGCAACCCAAGCCATTGAACCATTGGAAGACAACACCATTGCCTGCACGAGGGAATTTAGCAAAAAAGGAAGCTCATTAAATTCCCGTTCCCGCCTGAATGGAGTGTTGGTAAATCGCCAAATTTTGGCAGAATTGCGGAGCCAATTGGTGGAAATTACAGCCCAG…	MLLSLRINNFALIDCLEINFGQGLNVLTGETGAGKSILLDAIDLLLGGKAGARVLRQGCSSGVIEGIFSTSTELNDWLATQAIEPLEDNTIACTREFSKKGSSLNSRSRLNGVLVNRQILAELRSQLVEITAQGQTQQLLDPGQQRQLLDLFGGQNLLEKRQAVEITYKEFTQAKQALTARQQSEQNRLQRLDFLTYQLQELTEAELTDGDEWELLIQEQEKLSHVVELQQLSYQATQLLYQSERDTPAIADLLGDAEGQLQTMAEFDSSLNPLLELVQTALTQVIEAGRQVQRYGDNLEADPERLGEVEARLQVLKRICRKYGPSLTEAIAYQEKIQAEYDQLTDGEQSLAQLQESLTKAEQELIKHCGQLTLIRQKTAQKLEKRLVQELKPLAMEKV…	DNA repair protein RecN	DNA repair protein RecN
NC_000911.1:3208698-3210452:-	NC_000911.1	HRIBO	CDS	3208698	3210452	-	sll0502	SGL_RS16720	argS	1755	585	Yes	0.404127	2.29402	1.34907	0.209516	1.78094	0.995228	14.1	39.48	34.89	17.21	34.89	17.21	7.31	30.65	ATG	TAG	CTAACATCATCGTCC	ATGGTATCGATTCTGACCCAACTTAATGATCACTTTGCCCAAGCTCTGGAAGGTCAGTTTCCATCTGATGTTACCCTACCCACTCCCCTAGTGGTACCGGCTTCCAATCCTAAATTTGGTGATTTTCAATGCAACATTGCCCTGCCCTTAGCTAAGCAGTTGGGTCAACCGCCCCGGGCGATCGCCATGGAGATTGTGGATAAAGTTAATTTAAGCGAAATTTGTGAACCGTTAACCATTGCTGGGCCAGGTTTTATTAACATCAAGTTATTGCCTGATTATCTGGGGGAACAATTAATTAAACTTCAGCAAAATCAACAGTTAGGAGTGTCATTAGTTAAAGGCGAAGAACGGATAGTGGTAGATTTTTCAAGTCCCAATATTGCGAAGGAAATGCAT…	MVSILTQLNDHFAQALEGQFPSDVTLPTPLVVPASNPKFGDFQCNIALPLAKQLGQPPRAIAMEIVDKVNLSEICEPLTIAGPGFINIKLLPDYLGEQLIKLQQNQQLGVSLVKGEERIVVDFSSPNIAKEMHVGHLRSTIIGDCLARVLEFRGYDVLRLNHVGDWGTQFGMLITYLKEVYPEALVTADALDIGDLVTFYKQAKQRFDQDEQFRETSRQAVVALQAGDAKSIKAWQLLCEQSRREFQLIYDCLDITIEERGESFYNPFLPGVVELLQEKDLLVEDNGAQCVFLDGFTNKDGDRLPLIVQKSDGGYNYATTDLAALNYRLNTDGAEKIIYVTDAGQANHFAQFFQVAEKAGILTDPTQVVHVPFGLVKGEDGKKLKTRAGDTIRLKDLLT…	arginyl-tRNA-synthetase	arginyl-tRNA-synthetase
NC_000911.1:3154910-3156664:+	NC_000911.1	HRIBO	CDS	3154910	3156664	+	slr0031	SGL_RS16505		1755	585	Yes	0.277469	2.11389	1.19568	0.263561	1.89179	1.07768	11.97	55.87	43.14	26.43	43.14	26.43	11.37	50	ATG	TAA	ACTTCTCCAGCCACC	ATGCTCCCTACTCTCCCCCATCTGCACTACCAAGTGGCGATGCCAACGCCCCAGACCCACTACTTCACCGTGGATTTGCATATTCAAGGCTTCACTGCTTCTGTACTAGAACTGAAATTTCCCGTCTGGACACCAGGGTCCTATCTGGTAAGGGAATATGAGCGCCATTTGCAGGACTTCCAAGCTCAAGGTCTCAGCAACGGCGAATATTTAGAGCACCAAAAGTTGGGTAAGGCCCATTGGGCCATTGCCTGTGGAGAGGAAGAAAATATTGCCATTTCCTATCGCATTTATGCCGATGAACTAACCGTAAGAACCAATCATTTGGATTATAGTCATGGTTTCTTCACCGGGGCAGCATTGTTTTTCTACTTGCCAGGACATACCCACAGGCCTCTA…	MLPTLPHLHYQVAMPTPQTHYFTVDLHIQGFTASVLELKFPVWTPGSYLVREYERHLQDFQAQGLSNGEYLEHQKLGKAHWAIACGEEENIAISYRIYADELTVRTNHLDYSHGFFTGAALFFYLPGHTHRPLALTVVPPEPAWAIATALPCKATDSTTGAKTFYAQDFDTLVDSPVEVGIHRDYAFETQGKEHHFVVWGESNLNGEQLVRDTEKIIAVEAGLFGNLPYDHYWFILHTSNQGYGGLEHKDSCVLNYDRFGFRDPEKYQRFLQLVAHEFFHLWNIKRIRPIALEKFDYDQENYTPSLWFSEGTTSYYDLLIPLRAEIYDRQTYLKNLGKEITRYLKTLGRLVQPLAESSFDAWIKLYRRDANSDNSQMSYYLKGELVTLMLDLLIRERHQ…	hypothetical protein	hypothetical protein
NC_000911.1:2184030-2185784:-	NC_000911.1	HRIBO	CDS	2184030	2185784	-	sll0149	SGL_RS12150		1755	585	Yes	0.278109	1.85243	1.06527	0.130267	1.44188	0.786075	43.36	134.19	155.91	72.44	155.91	72.44	20.31	104.45	ATG	TAG	CAGCGGGGTCTGATT	ATGGGTATGCCATGGACCTTGGTGCGGTCATTAACTCTAGGCATTGCTTTTTCCGCTGAAAATGCCCCAACCCAGCCACTGTGCTACATATTTTTGTCTGTCCATTGTTCATCTATGACATCTTCCTTGCCCTCGTCCACCCAGCATCGGTTGCAGCAACTACCACAGATTCCGAGTGTCTGGGAAGGCGATCGCCGCCCGTTTCAGGGGGGATCCTTGGGGGAAAGGGAAGATGGGGAAGCAGGGGAATGCATTCTCTGGGTGGATGGCACTGAGGGGCTGGTGCGTTCCATGGATGTGATTCCTGAAACTTCAGGCATGGAAACCGTAGTCCGTACTCTGATCCGGGCCATGGAGATGCCCCGATCGCCAGCGCCCCCCTGTCGGCCCCAAAAAATT…	MGMPWTLVRSLTLGIAFSAENAPTQPLCYIFLSVHCSSMTSSLPSSTQHRLQQLPQIPSVWEGDRRPFQGGSLGEREDGEAGECILWVDGTEGLVRSMDVIPETSGMETVVRTLIRAMEMPRSPAPPCRPQKIVVRNRELQFLLRGILQGLNINVEYQAQLPLIDELFRTFDTIDDHRPAPIPPAFDVPLKKLAREIWHLSPWEVLTDLDIIAIQIPTLEGVPPLYACVMGMLGEEYGIILYRSLESLKTFRAMAMGEDDNQCLEQVFLSQDCWFINYEAGDQGETLPRANPPFFPASQDNQATAIFGSIHPLEGIRPFIDEEEALAIYCALEGLAHFVKAHHGDFEAENVELITKEVKVKHPLKPKNTKEQLLVQLSTQPELTAEFLGQLGFDEEEEE…	hypothetical protein	hypothetical protein
NC_000911.1:1848799-1850550:-	NC_000911.1	HRIBO	CDS	1848799	1850550	-	sll1181	SGL_RS10625	hlyD	1752	584	Yes	1.16027	7.76219	4.46123	0.601331	3.11064	1.85599	61.03	366.22	52.6	47.18	52.6	47.18	31.63	146.76	ATG	TAG	ATCGCCCCCAGAATT	ATGAATAGCCCCACCCAGGAACATGCTCCCCAAAGGAACGGCCACAGCTCCAAAACCATGGATGCGGGCACCTTGGCCGACGTAAAAGAACAGGAAAAGGCTGCCAAAACTCCCGTTGCTCTCTCATCCAACTCATCCCTATTCCAACCGGAACAAGCCATTGTCATGCGTCAGTCCCCCATGTGGGCCCGGGGTATTGCCATTGCGATTATGGGGGTGACTGTGGTGGCTGTGACCTGGGCTTCCATCGCTACCATTGAACAGGTGGTCCCCGCCACCGGACAACTGAAACCCCTCGATACAGTTAAGGACATCAATGCTCCCCTCAATGGGGTGGTTAAGGAAGTTTTAGTCGAAAACAACCGCAAGGTCAAAAAAGGTGAAGTGCTGGTAATCATG…	MNSPTQEHAPQRNGHSSKTMDAGTLADVKEQEKAAKTPVALSSNSSLFQPEQAIVMRQSPMWARGIAIAIMGVTVVAVTWASIATIEQVVPATGQLKPLDTVKDINAPLNGVVKEVLVENNRKVKKGEVLVIMDSSSTRAELTAAQNIRSKVLQENAFYRTLLQNGLEGSTLQRAISQLNLPWEVVALANNRAELINENKLYRQQLGLRNASGEGQLSAEQLSRLEMARFELGSRVTAAELEIRQIEKQLQQASLQLRAERSQLQEDQKILAGLLGRNEAALVEAEKSLAIEAGIVNSMTPLLEEGALARLQVEKQQQSLNDRTQQLIEQKVNTVVEVDRQKQQIESRQAEIQRLETEQSRLQSLISQAQARLANTSAVTDKDIYDRLADNNKRLAEID…	similar to hemolysin secretion protein	similar to hemolysin secretion protein
NC_000911.1:1327367-1329115:+	NC_000911.1	HRIBO	CDS	1327367	1329115	+	slr1740	SGL_RS08095		1749	583	Yes	0.41099	2.71859	1.56479	0.206926	1.3949	0.800915	14.36	46.95	34.94	17.27	34.94	17.27	7.23	24.09	GTG	TAG	TTATCCCTGTTGCCT	GTGTTGCTAAATCTTCCCGCCACCGTTAAGTCTCGTTCTTGCCAAAAACTAATTGGGGGGCTGTTGCCCTTATTATTGTTTGCCTGTGGTAGCCCCAATGTCGGCAATGGTAACTCTCAGCAGAATGGTCAAGAAACCCTGAAAATTCTCTCTTGGCAGGCTCCCACGATTTTAAATCCCCATTTGGCTACGGGCTTTAAGGATGCGGAAGCTAGTCGTATTGCCCTGGAACCCCTGGCAAGTTTTGACCAAGAAGGCAACCTAGTCCCGTTTTTGGCGGCGGAAATTCCCAGCGTAGAAAATGGCGGCGTGGCGGCGGATGGTTTGTCCGTCACCTGGAAGTTAAAGCCTGATGTGCTCTGGTCTGATGGGCAACCCTTCTCGGCGGAGGATGTGGCG…	VLLNLPATVKSRSCQKLIGGLLPLLLFACGSPNVGNGNSQQNGQETLKILSWQAPTILNPHLATGFKDAEASRIALEPLASFDQEGNLVPFLAAEIPSVENGGVAADGLSVTWKLKPDVLWSDGQPFSAEDVAFTYKFLSDPKTGATSTGTYEAIAKVEALDKNTVKITFKEPNPAWFLPFVGSEGMILPQHIYKDFVGEKARQAPANLLPIGTGPYRVTSFKPGDVVLYEVNPHYRDRKNIGFQQVEIKGGGDATSAARAVLQTGDADFALNLQVEDNILQSLAQGGKGEIVADLGSLSERVIFNLSDPDPARTNGDRSSVKFPHPFLQDPLVRKAITLGIDRDLIAKQLYGVTGQPTANVLVLPQQYASQNTSFQFNPTEAQQLLDQAGWKDSNGNG…	oligopeptide binding protein of ABC transporter	oligopeptide binding protein of ABC transporter
NC_000911.1:3429461-3431203:-	NC_000911.1	HRIBO	CDS	3429461	3431203	-	sll0727	SGL_RS17735		1743	581	Yes	0.149888	1.68038	0.915134	0.14877	2.29747	1.22312	1.34	5.31	8.94	3.16	8.94	3.16	1.33	7.26	ATG	TAA	CTGTGTTAATTGCCT	ATGCCACGGTCTTTTTTATTACTTTTACTTTGGATGGTGATCGCCGCTGGGCTACGCAGTTGGAATTTGGCCAGTAAACCCCCTTGGACCGATGAATTTGCCACCTTGGTCTTTAGCCTAGGCAACTCTTTTGAGAGCATACCCTTGGGCAAAGTGTTAACCGTTGCCGATCTCCTAACCATTCTGCAACCCCTACCCCAATCAGAACCAAATACCGTCATTAATGGTTTATTAAACGGCGATAACCATCCCCCCTTTTATTTTGTCCTAGCCCATCTTTGGTATCGATTATTTCCCCCCGACGGCAACTATTTATCCTTGGCGATCGGGCGATCATTACCGGTTATTTTTGGTACCATAGCCATACCTTTAGGCTATGGCTGTGCCAAATGGATCTGG…	MPRSFLLLLLWMVIAAGLRSWNLASKPPWTDEFATLVFSLGNSFESIPLGKVLTVADLLTILQPLPQSEPNTVINGLLNGDNHPPFYFVLAHLWYRLFPPDGNYLSLAIGRSLPVIFGTIAIPLGYGCAKWIWGKDQEKLAQFTALLMAISPYGIFISQEARHYTFAIIWGLISITCCLKSLNFLLKNKPLPFSLVIIWILANSLGISVHFFAVLPILAQGLALALWLGIWSRQGRINFLSALQSLTPVILGTASAGLSWIVIISQREFGHGMTEWIQFTNMSWVDMLIGPPAQLAAAGITMFCLLPVESEHLWIVLLSGLGMLAYFIWLTPVIWQGLGYGIKTEKDTRVIVLVTTFIFLIVIYLTISYGAGLDITRGARYSFNFWSLLMLIAGVGLGK…	hypothetical protein	hypothetical protein
NC_000911.1:2946344-2948086:+	NC_000911.1	HRIBO	CDS	2946344	2948086	+	slr0615	SGL_RS15595		1743	581	Yes	0.179716	1.8837	1.03171	0.0971218	0.945185	0.521153	26.35	50.86	146.62	27	146.62	27	14.24	25.52	ATG	TGA	CTTTAGGTTTCGTCC	ATGGCCGCCCCCAGCGTCAAGCAGTTACTTCGTTATTTAACTCCCCATTGGCGGGCGATCGGAGCTGGAACCTTTGCGCTATTTTTGGCCAATGCCCTGGGGGTTTACATTCCCATTTTGATGCGGGATAGTATTGACGATTTAATGCCCCCCTTTGAGGCATCGGACGTAGCTCGCATTGTGGTGCTAATTGTTGTTCTCGCTTCCCTAATGTGGTTTATCCGCATGGCCTCCCGCATTCTAATTTTTGGGGTGGGAAGACAGGTGGAATACGAGCTCAAACAGAAAATTTTTGACCATCTGCTCAAGTTAGAGCCCCTCTATTTCACCGAAAATACCATTGGGGATTTGATTAACCGGGCCACCAGCGATGTGGATAATATTCGTCGCTTGGTGGGT…	MAAPSVKQLLRYLTPHWRAIGAGTFALFLANALGVYIPILMRDSIDDLMPPFEASDVARIVVLIVVLASLMWFIRMASRILIFGVGRQVEYELKQKIFDHLLKLEPLYFTENTIGDLINRATSDVDNIRRLVGFAVLSLINTVFAYALTIPAMFALHIPLTLLAVSVYPLMLMSVNLFSGKLRDYQLEVQEELSALSELVQEDMSGISLIKIYSQEDNERQAFQTRNQKLLQANLKLARIRNFLFPLIEGLAYLSLLILLAFGTGLIQDGSITIGDFIALIILVERLVFPTALLGFTITAYQRGEVSIQRVEAIFHTTPKILTVPQPLPFSPAQATGKITARGLNYCYPGSDLPALEQVDFTVYPGEMVAIVGPIGSGKSTLVNVLPRLLDIAPGQVFI…	ATP-binding protein of ABC transporter	ATP-binding protein of ABC transporter
NC_000911.1:3022532-3024271:-	NC_000911.1	HRIBO	CDS	3022532	3024271	-	sll0284	SGL_RS15925		1740	580	Yes	1.06561	2.22466	1.64514	1.42674	2.9009	2.16382	38.33	68.92	35.97	30.98	35.97	30.98	51.32	89.87	ATG	TAG	CCCGCCCCAGAATTT	ATGTCAGACCATGCCCTCGGCTCCGTTACCCAAGGTTCCCTCAGTAAAGGCTTGGAAGTGCGTCTCCATGCGGATGTTTCCGTGGAAGAAATGCGGGTGGGGAAATTTTTAGTTATTCAGGGTAGGCGATCGCGCTTTTTTTGTTTGCTCACCGATGTTTCTTTAGGAACGGCAAATCCAAGGATTTTGGCTAATCCCCCTAACATTAACGATGATTTTTTAATTGATGTATTGGCCGGCAGTGGCACCTACGGCACGTTAGAATTAGCACCCATGTTAATGTTAACGGAGTCAGAAAAGGACTCGAGTTATGGGGAAAGTTCAGTTGAACAGATGAACGGTCAAGGCGATCGCCAGAGTAATGGCAATGGTTTGGCTTCCTATCAAGCTAATAGTAAT…	MSDHALGSVTQGSLSKGLEVRLHADVSVEEMRVGKFLVIQGRRSRFFCLLTDVSLGTANPRILANPPNINDDFLIDVLAGSGTYGTLELAPMLMLTESEKDSSYGESSVEQMNGQGDRQSNGNGLASYQANSNADVELLPVKTIPAHFSQVFEASERDFRLVFGWEDDPFRRNFAIGEPLDMAVPVCLDLDRFVERSNGVFGKSGTGKSFLTRLLISGIIHKQAAVNLMFDMHSEYGWEAMREGKTVSTVKGLRQLFPGEVEIFTLDAESTKRRGVRGAQELYLSFDQIEIEDIRLVGFELGLSEAALDNANILFSEFGSSWISRLLVMSNEEIKVFCEEKQGHPGSIMSLQRKLKRLENLKYLKQVSTHNYIDQLLQCLEAGKHVVIEFGSQSNLLSY…	hypothetical protein	hypothetical protein
NC_000911.1:166416-168152:-	NC_000911.1	HRIBO	CDS	166416	168152	-	sll0217	SGL_RS02645		1737	579	Yes	0.332659	3.33986	1.83626	0.354137	5.79124	3.07269	34.54	100.63	103.83	30.13	103.83	30.13	36.77	174.49	ATG	TAA	ACCACAAAGTTTTCT	ATGGTTACCCTAATTGATTCTCCAACCTCTGCTGCTGTCCAGCCCCGCTTAACACTCCAAACCGCGGACATTGCAGCCCACACCACAGCGATTCGTTGCCTTGACTGGGATCGGGATCGCTTTGATATTGAGTTTGAGTTACGCCATGGCACAACCTACAACTCATTTTTAATCCGAGGGGAAAAAACGGCCCTCATCGACACGTCCCATCGCAAGTTTGAGGCCGTCTACTTGCAACTGTTGCAGGATCTAGTTGATCTCAGAAGTCTCGACTATTTGATCGTCAATCATACAGAACCAGACCACAGTGGACTGATTCCAGACCTCTTAGAACTGGCCCCCCAGGTGACGGTGGTGGGCTCCAAGGTGGCCATCCAATTCTTGGAAAAGCTCGTACAC…	MVTLIDSPTSAAVQPRLTLQTADIAAHTTAIRCLDWDRDRFDIEFELRHGTTYNSFLIRGEKTALIDTSHRKFEAVYLQLLQDLVDLRSLDYLIVNHTEPDHSGLIPDLLELAPQVTVVGSKVAIQFLEKLVHRPFESQIVKSGHSLDLGQGHELQFISAPNLHWPDTILTYDSGTQVLYTCDVFGMHYCDDSLFDETPERLEPDFQYYYNCLMGSNARSVLMALKRIAPLQVVLVATGHGPLLQHHISHWLGQYDAWSQNQVKAETFVALFYVDGYGVSDRLVQTIADGISKTGVAIELVDLSVADTHEVRTLAQCAAGLVVGMPPQSSTSTTLDPLLGTILAAVHPKQVIGLFESGGGQDEPIYPLRNRFQELGLQEAFEPILLKTEPTAATDQLCR…	flavoprotein	flavoprotein
NC_000911.1:1590631-1592364:+	NC_000911.1	HRIBO	CDS	1590631	1592364	+	slr1506			1734	578	Yes	0.913462	8.3004	4.60693	0.192521	1.72024	0.95638	42.75	209.17	46.8	25.2	46.8	25.2	9.01	43.35	ATG	TAA	CTCGATATAGCTTCC	ATGGTCACTTTTCCCTTAAACCTCCGTCGTTGGCTGCAGTCCGTTTGTTTGGGAGCCCTCACGGCGATCGCCGTTCAATTGCCGGGCAAAACTGCGGAAAATATCTTTTTCACCTACGGGCCAATCAAGTTGACGGTGCGGGTGGAATCCCTAGAAAGATTTGTGCAGGATGGCACTGTGGATTCCAATCTCAGCTTTTTATTTAATCTGGTGGGAGCTTCCGAAGAAAAATTAGCAAAATTAAGGGAAATTATGGGGCTCCGGGCAGAGGTGGACCCCGTTGTGCTGAGTAACTTTTTTAACACCAGCCTGGGGGAAGATTCCCTGGCTAGGGCAGCGGTGATTCTCAATGCCCCCTGGGGAGCTAACTCCAAATATGGTATTCGGGCCGCAATTGTG…	MVTFPLNLRRWLQSVCLGALTAIAVQLPGKTAENIFFTYGPIKLTVRVESLERFVQDGTVDSNLSFLFNLVGASEEKLAKLREIMGLRAEVDPVVLSNFFNTSLGEDSLARAAVILNAPWGANSKYGIRAAIVQAAEDPEGGLSLINFIKKYPTDIHFQGEVVEERARAVELLVKASEHFIDKMIALSEIEAASEGDINFSALPDPTEMGPYGVAPKETWWLNDQSRNRRFYVDVYRPQRWKEGKTPVLVFSHGLASRPEDFDNAAEKMASYGFVVALPQHPGSDILQAQALLNRTSRQGYYPTEFIDRPKDISYVIDELERRNASEFGDRLNLTQVGVGGHSFGGYGALAVAGATIDWDFLKSECRIGQGVPNTALLLQCDALTLPRSDYDFRDPRVV…	hypothetical protein	hypothetical protein
NC_000911.1:3171428-3173158:+	NC_000911.1	HRIBO	CDS	3171428	3173158	+	slr0042	SGL_RS16575		1731	577	Yes	0.402078	3.29171	1.84689	0.267339	2.25717	1.26226	13.16	61.95	32.73	18.82	32.73	18.82	8.75	42.48	ATG	TAG	GAGGAATTCATCGCA	ATGAAACAATATCGATTCACTTGGCTCGCAGGATTTGCTACCGTTACTAGCCTAACCACATTCCCTGGTTCCGCTGGGGCTCAGATGCTGTATGAGGATGTCGATCCCATGGTAATTACTCCGGTGCAGGAACTGACTACCTTGCTGGACCAGCCCATGGGCCAAGTGACATCGGTTTCGGAGTTGCGGGATGTGCAACCAACGGATTGGGCCTATGAAGCCTTAAAAAGTTTAGTAGAGCGTTACGGTTGCATTGTGGGTTACCCCGATCGCACTTTCCGCGGCGATCGTGCCCTCAGTCGTTGGGAATTTGCCGCTGGTCTCAATGCCTGTATGAACGTGATGGAGCGGTTAATACAGGAAAATGTGGCCGTCATTCGGGCCGATATTGACAAGCTC…	MKQYRFTWLAGFATVTSLTTFPGSAGAQMLYEDVDPMVITPVQELTTLLDQPMGQVTSVSELRDVQPTDWAYEALKSLVERYGCIVGYPDRTFRGDRALSRWEFAAGLNACMNVMERLIQENVAVIRADIDKLQRLAREFEAELAALGARVDNLETRTAYLEDNQFSTTTKLNGEVIFSISGATGGEPDSDNAQIVFNDRVRLNLTTSFTGKDALITGLQAYNFTAGKPITGTGSVAETLFPNDASILGEGMTSFNYEPQFAGFNPQNLQPSCGNNSVCLYKLLYVTPVADNFTVFVGPKAEVTDAFPTIVPFASEGQGTLSRAFAINPVLRVSGGTTETGLASAAGFIYKPNDVVDWRALYGSVNAAIPQNEGFPGTPLGAGLFNGSFVAATQLTLYP…	probable porin, major outer membrane protein	probable porin, major outer membrane protein
NC_005230.1:29337-29639:-	NC_005230.1	HRIBO	CDS	29337	29639	-	sll7031	SGL_RS00760		303	101	Yes	28.8433	14.7739	21.8086	15.5507	9.27312	12.4119	6033.16	7940.23	209.17	537.45	209.17	537.45	3252.75	4983.84	ATG	TGA	TGCCAGTTTTGTCCC	ATGACCCAGATCACCAAGTCCAAAGCCCTGGCTAGGCTGGAAGCCCGGATTAGTCCAGAAACAAAAGCGTTGATGCAAAAGGCGGCGGCCCTGGAGGGCAGATCATTAACTGATTTTGTCGTCGCCAGTGCCCAAGCGGCCGCATTGAAGGTGATTGAACAGCATCAAACTCTCCAATTAACCATTGCCGACAGTCAAGCTTTTGTTGATGCGCTACTACGGCCATCGGAGCCAAATAGTAAGTTAAAAAAAGCCGCCTTGCGTCACCAACAAATAATAGAGATTGATGGTGTTAAAAATTGA	MTQITKSKALARLEARISPETKALMQKAAALEGRSLTDFVVASAQAAALKVIEQHQTLQLTIADSQAFVDALLRPSEPNSKLKKAALRHQQIIEIDGVKN		ORF_ID:sll7031_hypothetical protein
NC_005230.1:30699-31040:-	NC_005230.1	HRIBO	CDS	30699	31040	-	sll7033	SGL_RS00775		342	114	Yes	1.55156	3.94173	2.74665	0.57246	2.11839	1.34542	2564.72	2420.22	1652.99	614	1652.99	614	946.27	1300.69	ATG	TAG	CGAGAATGAAGCCCT	ATGAGTCGATTGTACGGTGACGAAAATTTTCCTATGCCTGTGGTGCAGGCTTTACGTGAACTAGGGCATGATGTACTGACTTGTTTGGATGCGGGGCAAGCCGATAAAGCTATTCCCGACGAGGATGTATTGGCTTTTGCTGTCGCTGAACAAAGGGCAGTGTTGACAATTAATCGTAAGGATTTTATTCGGCTTCATCTACAAAATGAATGCCATTGCGGTATCATTGTTTGTACTTTTAATGCAGATTTCTTAGCACAAGCAAAACAAATTGATGCGGCTTTGGAGCAGATAAGTGAACCCAGCAATCAGCTTATACGAATTAACCGCTTACAGGGATAG	MSRLYGDENFPMPVVQALRELGHDVLTCLDAGQADKAIPDEDVLAFAVAEQRAVLTINRKDFIRLHLQNECHCGIIVCTFNADFLAQAKQIDAALEQISEPSNQLIRINRLQG		ORF_ID:sll7033_hypothetical protein
NC_000911.1:1040531-1042258:+	NC_000911.1	HRIBO	CDS	1040531	1042258	+	slr1233	SGL_RS06730	frdA	1728	576	Yes	0.384306	4.38528	2.3848	0.167132	2.3746	1.27087	46.77	110.86	121.7	25.28	121.7	25.28	20.34	60.03	ATG	TAA	TTTGAAGGTTTTTCC	ATGCTCGAACAGGACGTTGTCATTGTCGGTGGGGGTTTAGCCGGTTGTCGGGCCGCCCTAGAAATTAAGCGTCTGGCCCCTGATACCAAAGTGGCGATCGTGGCCAAAACCCATCCCATCCGTTCCCATTCTGTGGCCGCCCAGGGGGGCATTGCAGCCAGTCTGAAAAACGTTGACGCTGAAGATTCCTGGGAAGCCCATGCCTTTGATACGGTGAAGGGATCGGATTATCTAGCGGATCAGGATGCGGTGGAAATTCTCACCAAAGAAGCCCCGGAAGTAATTATTGAGCTAGAACATTTGGGAGTACTTTTTTCCCGTTTACCAGACGGTAAAATTGCCCAGCGGGCCTTTGGCGGCCACTCCCACAATCGCACTTGCTACGCCGCCGATAAAACA…	MLEQDVVIVGGGLAGCRAALEIKRLAPDTKVAIVAKTHPIRSHSVAAQGGIAASLKNVDAEDSWEAHAFDTVKGSDYLADQDAVEILTKEAPEVIIELEHLGVLFSRLPDGKIAQRAFGGHSHNRTCYAADKTGHAILHELVNNLRRNKVEIYDEWYVMKLIYEEGEAKGLVMYEIATGRIEIVRAKAVMVATGGYGRVYNTTSNDYASTGDGLAMAAIAGIPLEDMEFVQFHPTGLYPVGVLISEAVRGEGAYLINSEGRRFMEDYAPSRMELAPRDITSRAITLEIRAGRGVNADGSAGGPYVYLDLRHMGREKIMSRIPFCWEEAHRLVGIDAVEQPMPVRPTVHYCMGGIPVNTDGRVRKNANELTEGFFAAGECACVSVHGGNRLGSNSLLECV…	succinate dehydrogenase flavoprotein subunit	succinate dehydrogenase flavoprotein subunit
NC_005231.1:15590-17317:-	NC_005231.1	HRIBO	CDS	15590	17317	-	sll8019			1728	576		0.92587	1.03911	0.982488	0.436825	0.695554	0.56619	5477.07	6785.09	5915.59	6529.74	5915.59	6529.74	2584.08	4541.79	GTG	TAG	GAGAGTATCTAAGCA	GTGCTAACGACCAAGCATCTGCCCCAAAGCTATACAGGGCAAAGGTTTTGTAGATTTTTCAAGCATCGATTTAACTTTATAAAAAGTTCTTATAGCTCTACCCCAGAGTGGATAACTATAAGTGATTACCCGATAGAGCACCGCAATTTATGGAGTGTTTACCAAGATCCGGAAAGGTTGATAGGGCTATCATTCGGGACAACAACGCACTACGCAGTGCTAGACATTGACTGTAGTAGTCCCTACCATCCGGGGAATAGTGAGTCGCAATACCGAGAGCTGTTAGGAGCCTACGAAGAAGTGGGTATAAACAGTGTAGTGACACTCCAATCCTCCAACAGCGGTGGGTTGCACGTTTACTTCGTCTTTCCGAAAGCTCTGCCCACATTTAAGCTAGCC…	VLTTKHLPQSYTGQRFCRFFKHRFNFIKSSYSSTPEWITISDYPIEHRNLWSVYQDPERLIGLSFGTTTHYAVLDIDCSSPYHPGNSESQYRELLGAYEEVGINSVVTLQSSNSGGLHVYFVFPKALPTFKLAHMLRLTAIKAGYEVKDGKLEIFPNTKTYSKHSKTSYKAVRLPLQRGSWLLDKDFVPYSNDIEVFLEQGEGAAEEQDIELIETAIESASHIKQFRRVKGEGDACSFAQDLREQIGEGWTSFGQTNDLLRIIGTYGRVFKGLEGQALADYIVRTAETSPGYQQYCQHKHNIQRRSKDWGRCIEKYYYPYGSEPTRSGTFKDMQRTGNRQARQVKENVVNRTRQEEAVARIKQGMDYVRQTMAVLPVKVGAMKDLLLEAIYHLFGKRTS…	hypothetical protein	sll8019_Derived by automated computational analysis using gene prediction method: Protein Homology.
[truncated: 3,302 more rows]

## Sheet: Table S2
Type	Identifier	TMHMM_PredHel	Genome	Peng et al. 2025	Translated by Manual inspection?	flanking genes	orientation	genomic location	Proteomics	Comment	Start	Stop	Strand	Locus_tag	Codon_count	Start_codon	Stop_codon	15nt_window	Nucleotide_Seq	Amino_Acid_Seq	RIBO-WT-1_TE	RIBO-WT-2_TE	RIBO-WT-avg_TE	TIS-WT-1_TE	TIS-WT-2_TE	TIS-WT-avg_TE	RIBO-WT-1_rpkm	RIBO-WT-2_rpkm	RNA-WT-1_rpkm	RNA-WT-2_rpkm	RNATIS-WT-1_rpkm	RNATIS-WT-2_rpkm	TIS-WT-1_rpkm	TIS-WT-2_rpkm	RIBO-WTdi-1_TE	RIBO-WTdi-2_TE	RIBO-WTdi-avg_TE	RIBO-WTmono-1_TE	RIBO-WTmono-2_TE	RIBO-WTmono-avg_TE	RIBO-WTtri-1_TE	TTS-WTdi-1_TE	TTS-WTdi-2_TE	TTS-WTdi-avg_TE	TTS-WTmono-1_TE	TTS-WTmono-2_TE	TTS-WTmono-avg_TE	TTS-WTtri-1_TE	TTS-WTtri-2_TE
[truncated: 2,711 more rows]
[truncated: 23 more columns]

[truncated: 1 more sheets: Table S3]
