# Supplementary material for: A revised genome annotation of the model cyanobacterium Synechocystis based on start and stop codon-enriched ribosome profiling and proteogenomics
Source: Research Square preprint supplement (doi:10.21203/rs.3.rs-8767029/v1), 2026-02-16
Supplement: Supplementary file 3 [file d5c2a143b30d08902703c4e7.xlsx]

## Sheet: Index
Supporting Tables	Description
Supporting Table S6	List of identified proteins from Student's t-test: Slr0489L-3xFLAG and control Co-IP
Supporting Table S7	List of identified proteins from Student's t-test: Slr0489S-3xFLAG and control Co-IP
Supporting Table S8	List of identified proteins from Student's t-test: Slr1079L-3xFLAG and control Co-IP
Supporting Table S9	List of identified proteins from Student's t-test: Slr1079S-3xFLAG and control Co-IP
Numbers are displayed correctly with decimal symbol defined as "." (dot) and digit grouping symbol defined as "," (comma).

## Sheet: Table S6
Supporting Table S6 - List of identified proteins from Student's t-test: Slr0489-3xFLAG and control Co-IP
Protein identity					Protein identification						Student's t-test		Label-free protein quantification (Log2 LFQ intensities; imputed values in italic)
Protein IDs	Protein name	Protein description	Sequence lengths	Mol. weight [kDa]	Number of proteins	Peptide counts	Sequence coverage [%]	MS2 counts	Q-value	Score	Log2 t-test Difference (Slr0489 IP/sfGFP IP)	-Log10 t-test p-value	Slr0489 IP Replicate 1	Slr0489 IP Replicate 2	Slr0489 IP Replicate 3	sfGFP IP Replicate 1	sfGFP IP Replicate 2	sfGFP IP Replicate 3
slr0489-3xFLAG	Slr0489-3xFLAG	Slr0489 3xFLAG fusion protein	155	18.055	1	10	38.7	44	0	184.05	10.5973	3.14721	30.5492	30.1885	31.2672	19.1913	18.7998	22.2218
chr1_116115;chr1_17047;chr1_71049;chr1_253927	Slr0489S	chr1_116115 Hypothetical protein [2622596 - 2622937]	114;100;110;140	12.952	4	14;1;1;1	69.3	71	0	275.51	8.7602	2.32411	31.0698	30.5467	31.1382	23.4239	19.1108	23.9394
slr2018	Slr2018	Slr2018 pilin operon protein	799	84.853	1	15	27.2	41	0	285.91	4.83569	3.11487	27.2266	27.2907	28.3915	23.5013	22.2847	22.6156
sll7086	Sll7086	CRISPR3 type III-Bv system Cmr5 protein	131	14.549	1	3	26.7	8	0	27.204	4.69166	3.46444	23.3801	24.1622	24.2672	18.9919	18.8924	19.8502
slr1330	AtpC	ATP synthase epsilon chain	136	14.58	1	2	30.9	8	0	39.176	3.3795	0.900573	23.8826	24.3529	19.036	18.6211	18.6276	19.8842
ssl0467	Ssl0467	Ssl0467 protein	71	8.254	1	2	12.7	2	0	11.89	3.01887	1.00789	23.6116	23.7994	19.8107	18.8287	18.8772	20.4592
slr0729	Slr0729	Thylakoid-associated protein slr0729	101	10.946	1	4	54.5	10	0	45.34	2.99802	0.854531	23.7103	23.9815	23.7963	23.872	18.3005	20.3215
slr0869	Slr0869	Slr0869 protein	812	92.531	1	7	8.3	10	0	51.583	2.97629	3.04794	22.2547	22.2155	22.709	19.0185	19.2362	19.9956
slr0442	Slr0442	minor pilin PilX2	611	62.907	1	4	6.4	10	0	29.749	2.81223	2.4753	21.9576	22.2121	22.3635	19.1564	18.7399	20.2002
slr0552	Slr0552	Slr0552 protein	244	26.721	1	5	23	9	0	43.054	2.18378	0.926555	22.6583	22.0566	19.4153	18.7873	18.661	20.1305
slr0476	Slr0476	Slr0476 protein	136	14.394	1	2	19.1	4	0	18.003	1.76693	0.873823	22.5113	22.6401	22.6211	22.5104	19.2597	20.7015
slr2032	Ycf23	Ycf23 protein	248	25.366	1	4	21.4	10	0	40.092	1.73864	1.29462	23.1573	23.348	22.2393	21.6515	21.7558	20.1213
slr0036	AspC	Aminotransferase	389	42.455	1	1	1.8	6	0	11.381	1.70667	0.203706	18.3991	17.1205	27.3763	19.0327	19.0533	19.6899
smr0005	PsaM	Photosystem I reaction center subunit XII	31	3.38	1	1	22.6	5	0	8.421	1.66016	0.266689	18.3651	26.1741	19.2937	19.0874	19.4773	20.2878
sll1908	Sll1908	D-3-phosphoglycerate dehydrogenase	526	56.211	1	7	15	13	0	71.878	1.60413	0.350115	23.9443	23.7173	19.6706	18.9173	23.3185	20.284
sml0008	PsaJ	Photosystem I reaction center subunit IX	40	4.5324	1	1	22.5	6	0	9.3739	1.54614	0.186456	18.2729	17.3114	27.2311	19.3038	19.0469	19.8264
sml0007	PsbY	Photosystem II protein Y	39	4.2019	1	3	89.7	12	0	32.096	1.4613	0.355499	24.4331	24.2585	24.7486	24.8337	24.6102	19.6124
sll0051	Sll0051	Sll0051 protein	159	17.799	1	4	31.4	11	0	39.199	1.40983	0.503396	23.9315	23.7163	23.7016	23.6936	23.495	19.9312
sll1638	Sll1638	Sll1638 protein	149	16.477	1	4	26.2	4	0	35.09	1.36359	0.285548	18.2375	24.4376	19.4579	18.9205	19.1019	20.0198
slr1051;chr1_22344	FabI	Enoyl-[acyl-carrier-protein] reductase [NADH] FabI	258;315	27.625	2	3;2	11.6	7	0	20.688	1.31395	1.1301	21.0699	20.708	19.7739	18.7006	18.9445	19.9648
sll1262	NdhN	NAD(P)H-quinone oxidoreductase subunit N	161	17.629	1	4	34.2	12	0	44.259	1.30572	0.547174	23.4211	23.64	24.4301	23.5509	23.5182	20.5049
ssr2998	Ssr2998	Ssr2998 protein	65	7.2203	1	4	43.1	12	0	28.411	1.30151	0.506266	23.7669	23.8084	23.793	23.9761	23.2051	20.2825
ssl2084	AcpP	Acyl carrier protein	77	8.5895	1	2	20.8	13	0	16.569	1.29261	0.382837	24.7504	24.8057	24.218	25.2967	24.0172	20.5823
slr0006;chr1_109609	Slr0006	Slr0006 protein	217;249	23.373	2	6;6	40.6	25	0	49.492	1.2195	3.1442	24.774	24.4727	24.3926	23.3574	23.4091	23.2143
sll0408	Sll0408	peptidyl-prolyl cis-trans isomerase	402	43.909	1	4	13.4	11	0	25.758	1.21419	0.362622	22.689	22.7329	20.0853	22.6293	18.886	20.3494
sll1743	RplK	50S ribosomal protein L11	141	14.977	1	4	29.8	8	0	25.471	1.19342	0.2764	23.4094	23.3059	19.6536	23.3343	19.397	20.0573
sll0078	ThrS	Threonine--tRNA ligase	603	68.872	1	3	5.5	3	0	18.093	1.14222	0.341928	18.307	22.8622	19.8382	18.8259	18.8697	19.8852
sll0230	Sll0230	hypothetical protein	101	10.944	1	2	16.8	7	0	13.857	1.13396	0.343973	22.1244	22.6391	19.5372	22.0377	18.6802	20.1809
slr1734	OpcA	Putative OxPP cycle protein OpcA	475	52.033	1	3	7.8	8	0	28.397	1.12884	0.427152	21.466	22.157	19.9984	18.4858	21.7154	20.0337
sll1212	RfbD	GDP-mannose 4,6-dehydratase	362	41.333	1	7	22.9	18	0	50.699	1.12286	0.535988	22.8588	22.5595	22.7843	22.8926	22.1134	19.8281
slr0043	CmpC	Bicarbonate transport ATP-binding protein CmpC	667	74.096	1	4	6.4	5	0	34.514	1.09205	0.507844	18.9093	21.9001	19.9652	18.5697	19.162	19.7667
sll0550	Dfa1	Diflavin flavoprotein A 1	573	63.505	1	2	2.6	3	0	13.747	1.07157	0.656507	21.1278	20.9924	20.9348	18.5664	21.0825	20.1915
sll1316	PetC2	Cytochrome b6-f complex iron-sulfur subunit 2	180	18.996	1	4	23.9	17	0	41.494	1.0665	0.346716	24.4059	23.96	23.5375	24.1389	24.1646	20.4004
sll1745	RplJ	50S ribosomal protein L10	173	18.675	1	3	18.5	4	0	21.734	1.06047	0.317056	18.8276	23.1152	19.6092	19.0636	19.1108	20.1962
sll0329	Gnd	6-phosphogluconate dehydrogenase, decarboxylating	482	52.873	1	7	16.8	18	0	58.078	1.05407	1.33593	24.2619	24.2016	24.2994	23.6126	23.5222	22.466
sll1398	Psb28	Photosystem II reaction center Psb28 protein	112	12.59	1	2	16.1	11	0	18.625	1.04768	0.445622	23.4072	23.1857	23.1211	23.4912	22.871	20.2088
sll1261	Tsf	Elongation factor Ts	218	24.231	1	6	33	12	0	49.564	0.995537	0.349236	23.576	23.4074	23.233	23.9187	23.2249	20.0862
slr0040	CmpA	Bicarbonate-binding protein CmpA	452	49.46	1	15	40.5	65	0	191.42	0.985871	1.41264	26.8682	27.0578	26.8089	26.1832	26.2975	25.2967
ssl1426	RpmI	50S ribosomal protein L35	67	7.8913	1	1	19.4	5	0	8.3602	0.982919	0.331213	18.7901	22.6835	20.0247	19.2638	18.9524	20.3332
sll1502	GltB	Ferredoxin-dependent glutamate synthase 1	1550	169.07	1	5	3.5	8	0	34.827	0.969835	0.488911	21.6787	21.2945	19.7224	21.0192	18.8614	19.9054
sll1981	IlvB	Acetolactate synthase	550	60.173	1	3	5.6	8	0	21.478	0.964347	0.435312	21.1792	21.2303	19.1776	18.8859	18.9112	20.897
chr1_280681	Sml0011	chr1_280681 Hypothetical protein [811257 - 810925]	111	12.88	1	1	6.3	5	0.0072993	6.11	0.955891	0.167854	18.5411	17.4642	24.0471	18.6446	18.1509	20.3893
slr0165	ClpP3	Probable ATP-dependent Clp protease proteolytic subunit 3	202	22.397	1	5	29.7	13	0	41.586	0.937991	0.716007	22.3951	22.583	22.3537	22.1062	22.095	20.3167
sll0180	Sll0180	Sll0180 protein	501	53.966	1	4	8.6	7	0	27.952	0.928733	0.402214	18.5437	21.0167	21.3192	18.9552	18.9169	20.2214
slr0549;chr1_143957	Slr0549	aspartate beta-semialdehyde dehydrogenese;chr1_143957 Hypothetical protein [3248307 - 3249323]	269;339	29.512	2	3;3	10.4	6	0	20.291	0.90596	0.327028	21.689	21.5224	19.8375	21.9374	18.6137	19.78
slr1842	CysK	Cysteine synthase	312	33.173	1	2	10.6	1	0	12.404	0.904247	0.159259	17.7513	17.99	24.1371	18.4778	18.8377	19.8502
sll0057	GrpE	Protein GrpE	249	27.567	1	5	25.7	13	0	37.837	0.874001	0.450337	22.662	22.4644	22.7389	22.5552	22.603	20.0851
slr0623	TrxA	Thioredoxin	107	11.748	1	6	62.6	36	0	77.62	0.868537	0.649575	25.6542	25.7355	25.3263	25.6516	24.8416	23.6172
slr0032	IlvE	Probable branched-chain-amino-acid aminotransferase	305	33.951	1	4	17	5	0	23.776	0.856542	0.317831	21.7897	21.7606	19.4062	21.5076	18.8413	20.038
slr1793;chr1_11522	Slr1793	transaldolase;chr1_11522 Hypothetical protein [260445 - 261635]	378;397	41.577	2	10;10	26.2	31	0	72.634	0.842806	0.892885	24.2891	24.4752	24.2258	24.0737	23.7473	22.6406
slr0228	FtsH2	ATP-dependent zinc metalloprotease FtsH 2	627	68.495	1	6	10.7	13	0	34.355	0.82561	0.355018	21.9009	21.6208	19.7127	19.392	21.5964	19.7692
slr1516	SodB	Superoxide dismutase [Fe]	199	21.677	1	5	42.2	14	0	53.94	0.823812	0.56008	26.4035	26.7781	25.3366	26.1688	25.4014	24.4765
sll0272	Sll0272	hypothetical protein	141	15.78	1	1	17	4	0	12.802	0.820449	0.281125	18.4702	21.9248	18.8697	18.9843	18.1557	19.6633
slr1963	Slr1963	Orange carotenoid-binding protein	317	34.658	1	11	37.5	44	0	117.01	0.816116	0.904246	26.7976	26.43	26.0685	26.1747	25.7427	24.9304
sll0199	PetE	Plastocyanin	126	13.146	1	4	44.4	34	0	66.525	0.813314	0.907363	26.0378	26.4407	26.3578	26.2431	25.2383	24.9149
ssr0390;chr1_7007	PsaK1	Photosystem I reaction center subunit PsaK 1	86;95	8.6442	2	1;1	19.8	5	0	36.195	0.809891	0.13977	18.5995	17.589	24.3643	19.2091	18.8156	20.0984
slr0489	Slr0489	Slr0489 protein	151	17.517	1	10	37.1	2	0	16.336	0.807206	0.141585	18.2782	17.8095	24.3317	18.9979	19.2386	19.7613
slr1517	LeuB	3-isopropylmalate dehydrogenase	362	38.667	1	2	6.1	4	0	12.518	0.79084	0.704423	20.3719	20.8249	19.5214	19.1089	19.1058	20.131
sll1852	Ndk	Nucleoside diphosphate kinase	149	16.692	1	6	48.3	23	0	41.116	0.784481	0.464315	22.351	22.8743	22.6877	22.8683	22.2161	20.4753
slr6071;slr6012	Slr6012	Slr6012 protein	730;730	84.206	2	5;5	6.3	5	0	30.124	0.781195	0.229194	18.1737	22.5676	19.457	19.0125	18.987	19.8553
sll1089	Sll1089	Sll1089 protein	213	23.491	1	2	11.7	1	0	12.401	0.755345	0.135762	23.9895	17.162	19.5008	18.8506	19.2002	20.3355
slr0193	Slr0193	RNA-binding protein	151	16.616	1	2	17.9	9	0	13.642	0.732454	0.284882	22.0151	21.7721	19.9996	21.8702	19.0424	20.6768
slr0597	Slr0597	phosphoribosyl aminoimidazole carboxy formyl formyltransferase/inosinemonophosphate cyclohydrolase (PUR-H(J))	553	59.326	1	4	8	13	0	33.324	0.715124	0.50815	22.0579	22.4378	22.0475	22.1409	21.9932	20.2637
sll5034	Sll5034	Sll5034 protein	207	23.2	1	3	14	6	0	21.368	0.71322	0.82519	20.3187	20.3306	19.5231	18.903	19.2169	19.9128
slr1234	Slr1234	Uncharacterized HIT-like protein slr1234	114	12.456	1	2	18.4	8	0	13.729	0.705229	0.375686	21.0609	20.7985	19.6579	20.8483	18.5839	19.9695
slr0898	NirA	Ferredoxin--nitrite reductase	502	55.926	1	6	12.9	19	0	42.914	0.688435	0.374344	22.4967	22.3076	22.3751	22.4175	22.5284	20.1681
sll1687	Sll1687	Sll1687 protein	970	109.82	1	10	10.7	23	0	95.681	0.684071	0.15666	24.1328	23.6912	19.257	20.7253	21.8849	22.4187
sll0617	Sll0617	Protein sll0617	267	28.905	1	8	34.1	35	0	85.645	0.676112	0.71907	24.5917	24.2502	24.24	24.3051	23.8493	22.8991
sll1070;chr1_280351	TktA	Transketolase	670;676	71.724	2	16;15	31.8	60	0	187.93	0.66315	0.745011	26.5541	26.7571	26.2819	26.3515	26.1442	25.1079
slr0783	TpiA	Triosephosphate isomerase	242	26.158	1	3	14.9	10	0	21.287	0.648849	0.316943	21.6141	21.7845	21.5887	22.2665	21.3453	19.4288
slr1626	FolB	Probable dihydroneopterin aldolase	118	13.146	1	2	17.8	3	0	23.996	0.644976	0.236803	18.3732	21.9508	19.8244	19.1447	19.139	19.9299
sll1356	GlgP	Glycogen phosphorylase	849	96.648	1	8	9.2	9	0	53.568	0.638236	0.440484	21.9751	22.1864	21.9207	22.0438	21.9667	20.1571
slr1855	Slr1855	Slr1855 protein	607	70.003	1	6	11	14	0	42.688	0.62836	0.35969	22.5431	22.4329	21.8291	22.1882	22.4692	20.2625
sll0872	Sll0872	Sll0872 protein	130	13.929	1	3	28.5	15	0	37.143	0.62122	0.211386	22.7857	23.1017	23.0011	23.9281	22.9562	20.1406
slr0009	CbbL	Ribulose bisphosphate carboxylase large chain	470	52.49	1	32	54	209	0	323.31	0.606632	1.79762	29.5933	29.5551	29.694	29.0971	29.2022	28.7233
slr0394	Slr0394	phosphoglycerate kinase	400	41.67	1	17	51	73	0	254.51	0.606368	0.643439	27.0244	27.0776	26.7222	27.0522	26.3239	25.629
ssl0707	GlnB	Nitrogen regulatory protein P-II	112	12.397	1	10	82.1	39	0	140.81	0.591185	0.58163	26.3112	26.6749	25.9543	26.4863	25.5605	25.12
slr1176	GlgC	Glucose-1-phosphate adenylyltransferase	439	49.366	1	10	27.3	34	0	93.159	0.585133	0.569565	23.9952	24.0503	23.7826	23.8977	23.7097	22.4653
sll0542	AcsA	Acetyl-coenzyme A synthetase	653	73.051	1	3	5.7	7	0	22.539	0.58044	0.29706	18.6878	21.1631	19.5001	19.0272	18.7721	19.8104
sll1099	Tuf	Elongation factor Tu	399	43.733	1	31	75.9	169	0	323.31	0.565287	1.19565	28.3336	28.4677	28.3307	28.0514	28.0072	27.3777
slr0201	HdrB	Heterodisulfide reductase subunit B	301	32.571	1	1	5	2	0	7.2896	0.562561	0.377344	18.5489	20.2376	20.3719	19.089	18.8183	19.5634
sll0587;chr1_185846	Sll0587	pyruvate kinase;chr1_185846 Hypothetical protein [2959529 - 2958039]	473;497	51.993	2	19;18	61.1	112	0	323.31	0.557237	0.62429	28.7362	28.4581	29.6013	28.3035	28.0574	28.763
sll0018	FbaA	Fructose-bisphosphate aldolase class 2	359	38.972	1	16	39.8	65	0	197.41	0.54803	0.460735	26.8221	27.0467	26.0058	26.4699	26.4932	25.2674
slr0550	DapA	4-hydroxy-tetrahydrodipicolinate synthase	301	31.821	1	4	15.6	9	0	29.685	0.534938	0.245616	21.4122	20.7833	19.1126	20.7927	18.9916	19.9191
slr1349	Pgi	Glucose-6-phosphate isomerase	531	58.356	1	3	5.8	11	0	20.674	0.527801	0.206895	21.681	21.2841	19.6279	21.6508	19.0171	20.3417
sll1341	BfrA	Bacterioferritin	156	18.331	1	2	10.9	4	0	11.919	0.526626	0.186251	18.743	21.9288	19.7461	19.5127	18.748	20.5772
slr1994	PhaB	Acetoacetyl-CoA reductase	240	25.333	1	2	10	4	0	12.839	0.525231	0.225888	20.976	20.7345	19.0135	20.9408	18.6456	19.562
sll1234	AhcY	Adenosylhomocysteinase	425	46.213	1	8	22.4	30	0	99.928	0.518553	0.786057	24.6977	24.6328	23.9575	24.0962	24.1081	23.528
slr1986	ApcB	Allophycocyanin beta chain	161	17.215	1	14	92.5	120	0	288.07	0.5177	0.738953	30.8341	30.8804	30.7487	30.6981	30.54	29.672
slr1843	Zwf	Glucose-6-phosphate 1-dehydrogenase	509	57.885	1	7	13.4	16	0	49.639	0.50838	0.273332	22.1751	22.2374	22.3044	22.4758	22.4752	20.2406
slr1722	GuaB	IMP dehydrogenase subunit	387	40.234	1	8	25.6	29	0	67.234	0.499191	0.918821	24.454	24.4144	24.3851	24.3771	23.8747	23.5041
sll1873	Sll1873	Sll1873 protein	121	12.906	1	5	71.9	25	0	70.694	0.492322	0.334441	24.7127	24.8185	23.5173	24.738	23.3727	23.4608
sll0017	HemL	Glutamate-1-semialdehyde 2,1-aminomutase	433	45.891	1	4	10.4	8	0	29.009	0.490125	0.105047	18.782	17.6975	23.0783	19.1612	18.8699	20.0563
sll1665	Sll1665	Sll1665 protein	589	63.607	1	4	7.8	18	0	35.372	0.488977	1.67668	23.5577	23.192	23.5315	22.8275	23.0376	22.9491
sll0837	Sll0837	Sll0837 protein	294	32.906	1	3	10.9	7	0	25.835	0.487632	0.263404	21.2945	20.9852	19.872	21.1823	19.1235	20.383
sll1694	HofG	General secretion pathway protein G	168	17.573	1	3	17.3	21	0	27.321	0.485102	0.50713	24.9324	25.0609	24.8218	25.0945	24.5834	23.6819
sll1393	GlgA2	Probable glycogen synthase 2	491	56.224	1	4	8.6	8	0	26.754	0.480683	0.246593	18.3098	20.4387	19.6917	18.7777	18.3488	19.8717
ssr1480;sll0517;chr1_175592	Ssr1480	RNA-binding protein Rbp1	83;101;140	9.3904	3	3;3;3	14.5	16	0	18.853	0.478129	0.3662	23.3133	23.6154	24.294	23.8125	23.6315	22.3443
sll2001	Sll2001	leucine aminopeptidase	508	53.885	1	4	9.8	15	0	38.128	0.472785	0.375404	21.9693	21.4337	21.726	21.7621	21.7213	20.2272
sll1342	Sll1342	NAD(P)-dependent glyceraldehyde-3-phosphate dehydrogenase	337	36.492	1	19	57.3	82	0	246.13	0.469308	1.65723	27.0983	27.2251	27.094	26.8311	26.7469	26.4314
slr1463	FusA	Elongation factor G 1	695	76.749	1	19	32.8	68	0	156.39	0.469226	0.800544	25.1591	25.1097	25.1717	24.9306	24.9648	24.1375
slr0585	ArgG	Argininosuccinate synthase	400	44.484	1	7	23	14	0	50.107	0.463177	0.80522	23.1952	23.2199	22.819	22.8597	22.8342	22.1506
ssl3441	Ssl3441	initiation factor IF-1	67	7.736	1	2	17.9	5	0	11.649	0.448936	0.152143	21.2558	17.7594	19.7978	18.8978	18.573	19.9954
chr1_16981	Chr1_16981	chr1_16981 Hypothetical protein [383370 - 383753]	128	14.686	1	3	39.1	10	0	108.99	0.438456	0.0351601	27.7221	28.2786	19.3259	29.2398	18.8388	25.9326
slr0452	IlvD	Dihydroxy-acid dehydratase	561	58.646	1	7	13.4	25	0	51.536	0.435589	0.447096	23.527	23.3757	23.1263	23.4663	23.1294	22.1266
ssr1528	Ssr1528	Ssr1528 protein	94	10.118	1	6	56.4	31	0	76.122	0.42698	0.251438	25.3977	25.5722	24.3139	25.5932	24.7079	23.7018
ssl1911	Ssl1911	Ssl1911 protein	65	7.4753	1	2	40	4	0	15.271	0.426751	0.138199	18.3129	21.9904	19.4663	19.1379	19.1524	20.199
ssr3383	Ssr3383	phycobilisome small core linker polypeptide	67	7.8051	1	7	79.1	30	0	66.347	0.40953	0.216016	26.7585	26.8728	25.4772	27.1048	25.6038	25.1713
slr2094	Slr2094	D-fructose 1,6-bisphosphatase class 2/sedoheptulose 1,7-bisphosphatase	345	37.074	1	18	52.2	81	0	323.01	0.409314	0.687164	28.2704	28.1612	28.1816	28.0765	28.0513	27.2574
sll1028	CcmK2	Carboxysome shell protein CcmK2	103	11.135	1	7	85.4	43	0	82.66	0.406572	0.454261	25.6976	26.2101	25.711	26.0716	25.4576	24.8698
sll1194	PsbU	Photosystem II 12 kDa extrinsic protein	131	14.245	1	6	48.1	29	0	71.267	0.406192	0.3175	26.1052	26.1231	25.4294	26.2489	25.5676	24.6227
ssl3364	Ssl3364	Ssl3364 protein	74	8.2948	1	3	35.1	13	0	42.087	0.40532	0.296124	24.0696	24.3293	22.9101	23.8104	23.5929	22.6898
slr1894	Slr1894	Protein slr1894	156	17.755	1	6	32.7	25	0	59.202	0.402698	0.381014	25.4685	24.9453	24.7268	25.098	24.9577	23.8767
slr1852	Slr1852	Slr1852 protein	188	21.834	1	6	32.4	28	0	57.451	0.402269	0.282285	24.775	24.6714	23.9013	24.775	24.2856	23.0803
slr0012	CbbS	Ribulose bisphosphate carboxylase small subunit	113	13.239	1	6	62.8	46	0	120.27	0.402084	1.62649	29.0087	28.9794	28.715	28.5834	28.5392	28.3743
sll0928	ApcD	Allophycocyanin subunit alpha-B	161	17.923	1	8	60.2	32	0	132.24	0.400599	0.332415	26.4382	26.2265	25.9852	26.536	26.0036	24.9084
slr0752	Eno	Enolase	432	46.528	1	6	18.5	23	0	58.061	0.400482	1.00408	23.5616	24.1558	23.7957	23.5581	23.4438	23.3098
sll1091	ChlP	Geranylgeranyl diphosphate reductase	407	44.882	1	8	18.9	12	0	53.571	0.395252	0.103109	23.1427	22.5764	19.3965	22.0409	22.0526	19.8363
slr0645	Slr0645	Slr0645 protein	206	22.785	1	2	7.8	4	0	12.566	0.393037	0.265026	20.6837	20.6251	19.4717	19.1354	20.6614	19.8045
slr1198	Slr1198	Rehydrin	211	23.559	1	13	59.2	73	0	148.77	0.391062	0.94976	27.7218	27.3954	27.4155	27.4294	27.0427	26.8874
slr0039	Slr0039	Uncharacterized protein slr0039	357	38.418	1	2	5.3	2	0	12.459	0.38648	0.183352	18.4655	20.5518	19.6131	18.5224	18.7376	20.2109
sll0006	AspC	Aspartate aminotransferase	394	43.979	1	2	6.3	3	0	12.895	0.361659	0.157492	18.45	20.8325	19.2846	18.8111	18.5184	20.1526
sll0521	NdhG	NAD(P)H-quinone oxidoreductase chain 6	198	21.522	1	1	6.1	5	0	10.363	0.361024	0.130244	18.4929	21.6066	19.5479	19.057	19.0884	20.419
slr1274	PilM	Membrane protein	367	40.879	1	2	4.4	2	0	11.922	0.356943	0.15589	18.5134	20.732	19.6795	18.7943	18.6404	20.4194
slr2025	Slr2025	Slr2025 protein	153	16.888	1	2	14.4	4	0	16.238	0.354043	0.11223	21.7823	18.3425	19.1067	18.7999	19.054	20.3154
sll0421	PurB	Adenylosuccinate lyase	431	48.42	1	4	8.8	11	0	26.351	0.337149	0.53265	21.5616	21.7884	21.6559	21.5433	21.6577	20.7934
slr0044	CmpD	Bicarbonate transport ATP-binding protein CmpD	282	31.34	1	3	10.6	4	0	22.505	0.324348	0.080848	22.1923	17.5912	19.4255	18.7659	19.1491	20.321
slr2067	ApcA	Allophycocyanin alpha chain	161	17.412	1	14	81.4	118	0	323.31	0.321217	0.392593	31.4814	31.5491	31.2606	31.6622	31.1576	30.5076
sll1525	Sll1525	phosphoribulokinase	332	37.914	1	11	37	58	0	127.7	0.31605	0.708125	25.6492	25.5216	25.0395	25.2066	25.1301	24.9254
sll1578;chr1_284463	CpcA	C-phycocyanin alpha subunit	162;174	17.586	2	15;14	93.8	177	0	323.31	0.313614	0.812003	33.0736	33.0189	32.9118	32.9697	32.7185	32.3752
sll0529	Sll0529	Sll0529 protein	731	78.316	1	15	28.7	48	0	139.9	0.307422	0.331487	25.6568	25.6658	25.3437	25.7313	25.485	24.5277
sll1471	CpcL	Photosystem I-associated linker protein CpcL	249	28.522	1	10	44.6	37	0	87.722	0.29924	1.02146	24.9974	24.7361	25.0671	24.7949	24.6373	24.4707
slr1106	Phb	Prohibitin	282	30.569	1	8	29.4	25	0	56.307	0.289389	0.407466	22.8248	22.5553	23.1216	22.1358	23.0077	22.4901
sll0427	PsbO	Photosystem II manganese-stabilizing polypeptide	274	29.911	1	10	48.5	42	0	192.98	0.283611	0.291608	26.6782	26.7045	26.4404	26.9612	26.3782	25.6328
slr0335	ApcE	Phycobiliprotein ApcE	896	100.29	1	43	55.9	200	0	323.31	0.282144	0.743246	28.1792	28.0809	27.8805	27.9915	27.8224	27.4802
slr1459	ApcF	Allophycocyanin subunit beta-18	169	18.892	1	10	58	58	0	137.07	0.279936	0.854993	26.2224	26.3303	26.183	26.161	26.0544	25.6806
sll1559	Sll1559	Soluble hydrogenase 42 kD subunit	384	40.768	1	10	28.6	39	0	98.121	0.276092	0.200805	25.8185	25.7471	24.6519	25.7053	25.2494	24.4346
slr1020	SqdB	Sulfolipid biosynthesis protein SqdB	383	43.202	1	5	12.5	16	0	32.658	0.273532	0.24285	23.3903	23.4221	22.6761	23.495	22.9606	22.2124
slr0899	CynS	Cyanate hydratase	149	16.532	1	3	24.2	12	0	24.371	0.271112	0.422854	22.3804	22.0978	22.3533	22.386	22.1191	21.513
slr1841	Slr1841	Slr1841 protein	630	67.6	1	1	2.5	4	0	11.089	0.257362	0.113442	18.4037	20.7172	19.7954	18.8103	19.0107	20.3233
sll1577	CpcB	C-phycocyanin beta subunit	172	18.126	1	17	83.7	237	0	323.31	0.257222	0.397954	32.2783	32.5726	32.0909	32.3618	32.213	31.5953
slr2051	CpcG	Phycobilisome rod-core linker polypeptide CpcG	249	28.901	1	24	82.3	121	0	323.31	0.252213	0.675226	29.0598	29.0638	29.1808	29.1103	28.8934	28.5441
slr1854	Slr1854	Slr1854 protein	198	22.293	1	5	27.3	13	0	39.557	0.247194	0.415288	22.6052	22.8866	22.7185	22.7853	22.6686	22.0149
slr1273	Slr1273	Slr1273 protein	146	15.714	1	2	15.8	6	0	12.988	0.239174	0.101865	18.1535	20.9001	19.6767	19.0435	19.0624	19.9069
sll1327	AtpG	ATP synthase gamma chain	314	34.605	1	8	34.7	36	0	146.81	0.233074	0.484227	24.8119	25.1679	25.5099	24.9124	25.036	24.8421
slr1718	ComB	Probable 2-phosphosulfolactate phosphatase	241	26.045	1	2	9.5	5	0	13.146	0.230219	0.137632	18.5048	20.1659	19.4849	19.1922	18.4675	19.8052
slr2075	GroES	Co-chaperonin GroES	103	10.859	1	9	76.7	43	0	105.08	0.227189	0.721522	26.6071	26.5114	26.3231	26.4118	26.3243	26.024
ssl0352	Ssl0352	Ssl0352 protein	58	6.5774	1	5	82.8	27	0	58.657	0.226641	0.338695	24.7234	24.9055	24.4442	24.9479	24.2293	24.2159
slr2024;chr1_34160	Slr2024	CheY subfamily	180;203	20.233	2	2;2	11.1	4	0	11.766	0.218569	0.115053	18.2613	19.634	20.0177	18.5173	18.7927	19.9473
sll0520	NdhI	NAD(P)H-quinone oxidoreductase subunit I	193	22.15	1	10	45.1	49	0	77.167	0.217591	0.475547	24.7098	24.5435	25.0316	24.6606	24.7013	24.2703
slr1619	Slr1619	Rhamnosyl O-methyltransferase	249	27.752	1	1	4.8	3	0	10.047	0.215449	0.0987776	18.4423	20.8425	20.094	19.3156	19.1842	20.2327
sll1734	Sll1734	Sll1734 protein	431	50.038	1	9	20.9	32	0	83.018	0.208531	0.639755	25.3944	25.5153	25.0446	25.0743	25.1919	25.0625
slr0875	MscL	Large-conductance mechanosensitive channel	145	15.805	1	1	9	2	0	10.998	0.20601	0.0576782	21.196	17.2398	19.511	18.508	18.8068	20.0138
sll1338	Sll1338	Sll1338 protein	187	20.183	1	1	7.5	4	0	6.6241	0.203835	0.102074	18.4673	20.6449	20.1386	19.2277	19.292	20.1195
slr0876	Slr0876	Slr0876 protein	409	45.252	1	2	5.4	2	0	11.573	0.200293	0.103328	18.4135	20.3945	19.454	18.9108	18.738	20.0123
sll1663	Sll1663	Sll1663 protein	220	24.104	1	2	10	9	0	17.531	0.19967	0.0953104	21.8088	21.3682	19.5298	21.1314	20.7771	20.1992
sll1526	Sll1526	Uncharacterized protein sll1526	506	57.726	1	4	8.9	9	0	22.961	0.196953	0.105929	21.2139	20.4388	19.3814	20.5975	19.3306	20.515
slr0665	AcnB	Aconitate hydratase B	868	93.551	1	4	5.3	13	0	29.835	0.17767	0.062736	21.9503	21.8208	19.0939	21.2818	20.8598	20.1905
slr0149	Slr0149	Slr0149 protein	156	18.386	1	1	5.8	1	0.0073126	6.1153	0.171988	0.104465	18.6097	19.2759	19.8413	18.5247	18.6711	20.0151
slr1281	NdhJ	NAD(P)H-quinone oxidoreductase subunit J	179	20.593	1	4	17.3	23	0	33.813	0.171213	0.61206	23.9062	23.9339	23.9636	23.8053	23.9548	23.5299
slr0261;chr1_66945	Slr0261	NADH dehydrogenase subunit 7;chr1_66945 Hypothetical protein [1509984 - 1511171]	384;396	44.347	2	16;16	34.6	49	0	139.24	0.163328	0.569225	26.0912	25.7758	25.941	25.951	25.692	25.675
slr1329	AtpD	ATP synthase subunit beta	483	51.732	1	22	71	121	0	323.31	0.160429	0.569867	28.8486	28.8307	29.0842	28.8547	28.5711	28.8566
sll0554	FtrC	Ferredoxin-thioredoxin reductase, catalytic chain	118	13.39	1	1	6.8	6	0	7.6627	0.158382	0.037484	18.0267	17.8217	21.8902	18.9405	18.2183	20.1047
sll1317	PetA	Cytochrome f	328	35.23	1	7	27.4	25	0	89.21	0.156437	0.156882	24.305	23.9308	23.7054	23.9937	24.2914	23.1868
sll1027	GltD	NADH-glutamate synthase small subunit	494	54.144	1	3	5.9	4	0	19.17	0.155659	0.0433284	21.2556	17.4658	19.4044	18.6749	18.6606	20.3232
sll1746	RplL	50S ribosomal protein L7/L12	128	13.259	1	7	59.4	31	0	108.08	0.142754	0.377152	27.4385	27.4381	27.2882	27.5446	27.1293	27.0627
slr1275	Slr1275	Slr1275 protein	284	30.034	1	1	2.5	2	0.0037383	6.2867	0.141669	0.0733238	18.3772	20.4285	19.8929	18.8795	19.5438	19.8503
slr0506	Por	Light-dependent protochlorophyllide reductase	322	36.061	1	4	13	11	0	29.426	0.134541	0.0744157	21.7118	20.9024	19.8766	21.3871	20.4192	20.281
sll0947	Hpf	Ribosome hibernation promotion factor	191	21.895	1	8	64.9	25	0	87.771	0.132329	0.3651	23.9855	23.8858	23.832	23.962	23.8584	23.4859
sll1712	Hup	DNA-binding protein HU	100	10.891	1	7	50	35	0	58.634	0.125774	0.099938	25.6328	25.4382	24.5983	25.609	25.1782	24.5048
slr2023	FabD	Malonyl CoA-acyl carrier protein transacylase	293	31.49	1	1	3.4	4	0	8.4915	0.119884	0.0460813	18.3206	20.8809	19.2606	19.0362	18.7487	20.3176
slr1848	HisD	Histidinol dehydrogenase	434	46.533	1	2	5.1	2	0	14.266	0.11883	0.0689551	18.4898	19.8229	20.0749	19.0611	18.935	20.035
slr1643	PetH	Ferredoxin--NADP reductase	413	46.359	1	17	48.7	58	0	175.4	0.118383	0.464057	26.4328	26.2708	26.1625	26.3251	26.0947	26.0911
sll0301	Sll0301	Sll0301 protein	169	18.611	1	2	13	1	0	10.987	0.11743	0.0822237	18.8126	19.8162	19.5924	18.7786	19.0053	20.085
sll1841	OdhB	Dihydrolipoamide acetyltransferase component of pyruvate dehydrogenase complex	433	44.898	1	3	12.5	7	0	26.153	0.117348	0.0388083	22.4407	22.0546	19.3738	21.4393	21.6037	20.4739
sll1326	AtpA	ATP synthase subunit alpha	503	53.965	1	20	45.9	108	0	323.31	0.116231	0.787865	28.1264	28.1857	28.2663	27.9677	28.1214	28.1406
sll1735	Sll1735	Uncharacterized protein sll1735	133	14.105	1	4	42.1	19	0	44.003	0.112871	0.301955	25.9044	26.136	26.0453	26.1726	25.7087	25.8657
sll0830;chr1_190785	Sll0830	Elongation factor G-like protein	669;676	73.369	2	2;2	2.4	2	0	11.409	0.107865	0.0570059	18.7408	20.3301	19.9784	19.0589	19.212	20.4548
slr0073	Slr0073	Sensory transduction histidine kinase	315	35	1	1	2.5	2	0	6.4635	0.106173	0.0518615	18.623	19.7625	20.1099	19.1065	18.6291	20.4412
sll0185	Sll0185	Sll0185 protein	419	46.993	1	1	2.4	6	0	8.1181	0.105121	0.0390278	18.3511	20.5813	19.4936	18.6318	18.8131	20.6657
slr1665	DapF	Diaminopimelate epimerase	279	30.096	1	1	3.9	1	0	9.9048	0.0992292	0.0518101	18.6389	20.1941	19.779	18.8776	19.0722	20.3644
sll1931	GlyA	Serine hydroxymethyltransferase	427	46.259	1	5	13.1	14	0	36.426	0.0983715	0.0278117	22.358	22.4438	19.2503	22.0486	21.5217	20.1867
sll1823	Sll1823	adenylosuccinate synthetase	443	48.679	1	1	2	0	0.0089606	5.9525	0.0982151	0.0442558	18.1058	19.702	19.7227	18.8502	18.2858	20.0998
sll1830	Sll1830	Sll1830 protein	358	39.648	1	5	13.1	16	0	38.938	0.0979582	0.314493	22.3372	22.5213	22.542	22.213	22.3137	22.5799
ssr2831	PsaE	Photosystem I reaction center subunit IV	74	8.145	1	7	86.5	33	0	237.94	0.0938123	0.168162	28.1548	28.3204	28.7577	28.3392	28.1175	28.4948
ssl0242	Ssl0242	Ssl0242 protein	78	8.9765	1	1	14.1	3	0	6.8035	0.0934124	0.0440792	18.2418	20.4384	19.7572	18.9958	19.143	20.0183
sll0244	GalE	UDP-glucose 4-epimerase	338	37.13	1	7	27.5	21	0	51.964	0.0889956	0.115291	23.2616	23.2653	23.8585	23.1858	23.1636	23.769
ssl3093	CpcD	Phycobilisome 8.9 kDa linker polypeptide, phycocyanin-associated, rod	83	9.3222	1	8	96.4	72	0	170.51	0.0884406	0.247427	27.426	27.6501	27.5541	27.6944	27.4014	27.2691
slr1756	Slr1756	glutamate--ammonia ligase	473	52.999	1	16	40.8	96	0	258.92	0.0860004	0.200948	27.2814	27.324	26.9053	27.1857	27.1776	26.8894
sll1363	Sll1363	ketol-acid reductoisomerase	367	39.951	1	13	36.8	46	0	123.33	0.082585	0.548457	25.4531	25.5219	25.6167	25.4254	25.5379	25.3806
sll1029	CcmK1	Carboxysome shell protein CcmK1	111	12.102	1	10	70.3	36	0	113.53	0.0816784	0.0304524	26.3372	26.9458	24.2737	26.2116	26.1326	24.9675
sll1580	CpcC1	Phycobilisome 32.1 kDa linker polypeptide, phycocyanin-associated, rod 1	291	32.52	1	17	65.3	103	0	293.39	0.0809453	0.19151	29.4718	29.4592	29.051	29.4081	29.2074	29.1237
slr1410	Slr1410	Uncharacterized WD repeat-containing protein slr1410	334	35.989	1	2	6.3	2	0	13.043	0.0774689	0.0206276	21.5106	17.5045	19.6272	19.7008	18.5532	20.1559
sll1306	Sll1306	Sll1306 protein	335	38.27	1	2	5.7	7	0	15.386	0.077329	0.0347146	21.8016	21.3163	19.5326	21.3359	20.795	20.2877
sll1621	Sll1621	Peroxiredoxin sll1621	189	21.167	1	11	45	41	0	89.643	0.0743688	0.0700749	26.1009	26.1129	25.6951	26.566	25.6995	25.4203
sll1213	Fcl	GDP-L-fucose synthase	312	34.719	1	6	21.8	25	0	49.284	0.0710341	0.0739721	23.4356	23.3669	22.98	23.7392	23.1477	22.6825
sll1325	AtpH	ATP synthase subunit delta	185	20.093	1	5	30.3	17	0	47.929	0.0707506	0.193479	23.8141	23.5023	23.6712	23.5364	23.7994	23.4396
sll1805	RplP	50S ribosomal protein L16	139	16.035	1	3	26.6	14	0	24.778	0.0683333	0.114173	23.0125	23.2435	23.5904	23.19	22.9878	23.4635
sll0504	LysA	Diaminopimelate decarboxylase	469	50.847	1	3	7.9	3	0	19.804	0.0674051	0.0208721	21.1222	17.6615	19.7947	19.157	19.0097	20.2096
sll1789	RpoC2	DNA-directed RNA polymerase subunit beta	1317	144.78	1	11	8.1	41	0	86.502	0.0643883	0.104887	23.9144	23.7869	24.1922	23.5358	24.0171	24.1475
slr1280	NdhK1	NAD(P)H-quinone oxidoreductase subunit K 1	248	27.345	1	12	50.8	55	0	132.13	0.0571677	0.139686	26.486	26.3797	26.8688	26.4996	26.5795	26.484
sll0945	GlgA1	Glycogen synthase 1	477	54.346	1	2	4.6	4	0	15.305	0.0549132	0.0182637	17.8902	20.9211	19.1435	19.1467	18.505	20.1384
ssl1046	Ssl1046	Ssl1046 protein	84	9.1387	1	1	13.1	1	0	7.7048	0.0498352	0.0167867	17.9494	21.0638	19.2162	19.2368	18.7522	20.0909
slr1128	Slr1128	Uncharacterized protein slr1128	321	35.727	1	7	23.1	23	0	64.648	0.0481892	0.0691783	23.0116	22.9363	23.3813	23.2417	23.2825	22.6604
slr0808	RimM	Ribosome maturation factor RimM	185	20.715	1	4	16.2	14	0	31.325	0.0463359	0.0490605	23.9249	23.2283	24.2347	23.7937	23.5092	23.9459
sll0258	PsbV	Cytochrome c-550	160	17.884	1	7	54.4	33	0	79.384	0.0379264	0.0354779	26.2338	26.4526	25.961	26.8429	25.827	25.8637
sll1031	CcmM	Carboxysome assembly protein CcmM	687	73.12	1	12	21	44	0	103.6	0.0341187	0.060017	24.8105	24.9079	24.2898	24.7016	24.5499	24.6544
sll0039	Sll0039	CheY subfamily	119	13.181	1	3	33.6	5	0	17.607	0.0313778	0.0119827	20.2924	17.8193	19.1465	18.61	18.5274	20.0267
sll1106	Sll1106	Sll1106 protein	171	18.031	1	4	31	18	0	41.443	0.0273565	0.042631	24.3287	24.2643	23.7009	23.9527	24.2471	24.0121
sll0041	PixJ1	Photoreceptor for positive phototaxis PixJ1	1000	108.33	1	5	5.4	6	0	37.182	0.0269356	0.00613299	22.1862	17.3124	19.3366	19.4257	19.2046	20.1241
slr2034	Ycf48	Photosystem II assembly lipoprotein Ycf48	342	37.29	1	5	14.9	18	0	39.885	0.0250085	0.0915005	21.8228	21.8207	22.038	21.8837	21.9741	21.7486
sll1579	CpcC2	Phycobilisome 32.1 kDa linker polypeptide, phycocyanin-associated, rod 2	273	30.797	1	17	53.8	82	0	217.54	0.0234947	0.0626166	28.8899	28.8586	28.549	28.8734	28.6258	28.7279
sll0144	PyrH	Uridylate kinase	260	27.651	1	1	4.2	3	0	7.9762	0.0232042	0.0131731	18.6153	19.9466	19.6046	18.8884	18.9973	20.2112
slr0453	Slr0453	hypothetical protein	821	92.447	1	13	16.4	31	0	104.21	0.0211207	0.0320244	23.7141	23.7733	24.3338	23.8114	23.8225	24.124
sll0851	PsbC	Photosystem II CP43 reaction center protein	460	50.302	1	11	25.2	52	0	145.95	0.0206413	0.210232	26.8862	26.9243	26.9117	26.8277	26.8796	26.953
sll0320	Rnd	Ribonuclease D	217	24.403	1	1	5.1	5	0	7.7048	0.018837	0.00839959	18.4005	20.357	19.6147	18.9925	18.9497	20.3734
sll1450	NrtA	Nitrate/nitrite binding protein NrtA	446	48.966	1	11	27.1	40	0	100.39	-0.00943438	0.00962353	24.4204	24.1929	24.2516	24.7875	24.3975	23.7082
sll1932;chr1_290236	DnaK3	Chaperone protein dnaK3	771;794	86.029	2	2;2	1.9	4	0	6.5562	-0.0114752	0.00235123	18.3055	17.7375	22.5209	19.0223	19.0148	20.5613
sll1218	Ycf39	Ycf39 protein	219	23.534	1	2	9.1	2	0	11.06	-0.0116997	0.00332421	21.0164	17.3188	19.2302	18.7278	18.8152	20.0577
slr1645	Slr1645	photosystem II 11 kD protein	135	14.917	1	4	49.6	15	0	32.147	-0.0121651	0.0291486	23.4852	23.6867	23.8864	23.8262	23.5533	23.7152
sll1282	RibH	6,7-dimethyl-8-ribityllumazine synthase	164	17.617	1	3	19.5	11	0	18.969	-0.0163244	0.0357814	23.3063	23.1406	23.5901	23.2228	23.3585	23.5047
sll1783	Sll1783	Uncharacterized protein sll1783	147	16.822	1	1	8.8	3	0	10.705	-0.0253309	0.0129398	18.6892	20.1282	19.1021	18.9518	18.7483	20.2954
sll0359;chr1_221462	Sll0359	hypothetical protein;chr1_221462 Hypothetical protein [2146473 - 2146003]	128;157	14.082	2	7;6	57	27	0	101.97	-0.0280279	0.0798613	24.8433	24.9007	24.798	24.7536	24.7566	25.1158
slr1838	CcmK3	Carboxysome shell protein CcmK3	103	11.003	1	1	10.7	1	0	7.7567	-0.034249	0.0213752	18.4106	19.5598	19.7499	18.968	18.9164	19.9386
sll0726	Pgm	Phosphoglucomutase	567	61.124	1	5	8.5	11	0	39.145	-0.0353457	0.0123673	22.2665	22.0012	19.7711	22.2392	21.4458	20.4598
slr0559	NatB	Periplasmic binding protein of ABC transporter for natural amino acids	454	46.672	1	3	12.1	11	0	26.976	-0.0363013	0.01298	21.8266	22.199	19.6683	21.3694	22.0464	20.387
slr2097	GlbN	Group 1 truncated hemoglobin GlbN	124	13.867	1	1	10.5	3	0	9.0418	-0.0402222	0.023699	18.5507	19.9401	19.7117	19.3674	18.84	20.1157
ssr2799	RpmA	50S ribosomal protein L27	87	9.4485	1	4	41.4	15	0	30.259	-0.0406119	0.066301	23.4055	23.6938	23.747	23.3298	23.667	23.9714
slr0906	PsbB	Photosystem II CP47 reaction center protein	507	55.902	1	13	32.1	54	0	164.54	-0.0448316	0.225971	26.852	26.7764	26.7313	26.7174	26.9562	26.8207
sll1762	Sll1762	periplasmic protein, putative polar amino acid transport system substrate-binding protein	299	32.831	1	5	20.1	10	0	37.951	-0.0459353	0.0270008	21.4291	21.7451	20.0844	21.4031	21.377	20.6164
slr0927;sll0849	PsbD	Photosystem II D2 protein	352;352	39.492	2	5;5	18.5	25	0	56.615	-0.0461661	0.147838	25.873	25.959	25.585	25.8923	25.8011	25.8621
slr1624	Slr1624	Slr1624 protein	458	51.008	1	1	3.1	2	0	8.532	-0.0474962	0.0214814	18.5463	20.6504	19.122	19.41	18.8586	20.1926
sll0807	Rpe	Ribulose-phosphate 3-epimerase	230	24.971	1	5	23	12	0	49.54	-0.0493577	0.00904062	24.0856	23.5871	19.1876	23.3788	23.0805	20.5492
sll0416	GroEL2	Chaperonin GroEL 2	552	57.774	1	30	62.3	136	0	323.31	-0.0511144	0.548954	28.1433	28.1298	28.0194	28.1273	28.1478	28.1707
sll1324	AtpF	ATP synthase subunit b	179	19.804	1	9	45.8	37	0	88.461	-0.0533733	0.204984	25.5009	25.3728	25.2723	25.3325	25.3904	25.5832
slr0038	Slr0038	Slr0038 protein	132	15.24	1	2	14.4	2	0	11.917	-0.0539875	0.0214185	18.0029	20.331	19.4146	18.8632	18.7493	20.2979
sll1130	Sll1130	Sll1130 protein	115	12.933	1	6	62.6	23	0	49.726	-0.0563958	0.064154	24.4508	24.4262	24.1384	24.8295	24.5074	23.8478
sll1470	LeuC	3-isopropylmalate dehydratase large subunit	468	50.458	1	2	4.5	5	0	14.314	-0.0596015	0.0402009	20.9314	20.9498	19.5053	20.5509	20.7812	20.2332
slr2076	GroEL1	Chaperonin GroEL 1	541	57.652	1	41	63.6	196	0	323.31	-0.0616824	0.526272	28.9061	28.8947	28.7886	28.9941	28.9035	28.8768
sll0822	Sll0822	Sll0822 protein	129	13.962	1	2	24.8	11	0	16.462	-0.0651391	0.0725807	21.4156	22.405	22.2373	21.9482	22.1011	22.204
slr0245	Slr0245	Uncharacterized protein slr0245	304	33.649	1	2	6.6	3	0	16.81	-0.0660992	0.039753	18.3026	19.8332	19.6815	19.2713	18.8787	19.8657
slr1623	NdhM	NAD(P)H-quinone oxidoreductase subunit M	121	14.078	1	4	43.8	21	0	33.285	-0.0706075	0.0943178	22.9476	23.0606	23.5171	23.1194	23.643	22.9748
sll0735	Sll0735	Sll0735 protein	529	62.075	1	2	3.2	3	0	12.826	-0.0707442	0.0336289	18.2893	20.2234	19.2457	19.1596	18.6575	20.1536
slr1289	Slr1289	isocitrate dehydrogenase (NADP+)	475	52.258	1	3	6.1	8	0	24.043	-0.0776488	0.0252144	22.1977	22.1872	19.9454	22.3861	22.0612	20.1158
slr1887	HemC	Porphobilinogen deaminase	320	34.894	1	3	7.8	5	0	17.45	-0.0831159	0.0252811	22.3795	21.5053	19.118	21.868	21.2626	20.1214
sll1463	FtsH4	ATP-dependent zinc metalloprotease FtsH 4	628	68.198	1	6	8.6	15	0	38.954	-0.0855204	1.0671	22.8588	22.7883	22.8048	22.8876	22.9626	22.8583
slr0738	TrpE	Anthranilate synthase component 1	508	57.146	1	1	1.8	2	0	6.5152	-0.0868988	0.0491882	18.4626	19.6341	19.6972	18.8862	18.9089	20.2595
slr1022	ArgD	Acetylornithine aminotransferase	429	46.567	1	1	2.8	4	0	9.9799	-0.0870736	0.0529348	18.6224	19.9375	19.5534	18.8474	19.2892	20.2379
slr1719	Slr1719	DrgA protein homolog	201	22.758	1	6	36.3	20	0	68.766	-0.0880203	0.264642	24.0332	23.8279	24.2648	24.1254	24.2039	24.0607
slr1295	FutA1	Iron uptake protein A1	360	39.37	1	1	2.2	1	0.0018939	6.4155	-0.0881392	0.0459259	18.6408	18.6381	19.8878	18.3313	19.0231	20.0768
sll1815;chr1_279789	Adk1	Adenylate kinase 1	187;194	20.453	2	4;4	29.4	13	0	37.364	-0.0886676	0.0217394	22.7683	23.0607	19.4796	22.8206	22.3292	20.4248
sll0588	Sll0588	Sll0588 protein	153	16.516	1	1	5.2	6	0	7.2606	-0.0930672	0.0172894	18.1683	16.9096	22.6995	19.2475	18.8535	19.9556
sll1787	RpoB	DNA-directed RNA polymerase subunit beta	1102	123.36	1	11	11.7	35	0	84.93	-0.0953089	0.608684	23.2621	23.1359	23.2093	23.2548	23.2223	23.4161
slr1220	Slr1220	Slr1220 protein	317	36.009	1	3	9.5	10	0	22.939	-0.105548	0.0503353	21.3402	21.4311	19.3224	21.0917	20.9285	20.3902
sll0577	Sll0577	Sll0577 protein	169	17.839	1	1	8.9	3	0	8.9135	-0.10684	0.060549	18.3091	20.0953	19.6829	19.05	19.3374	20.0203
sll1784	Sll1784	Sll1784 protein	267	29.757	1	3	13.1	10	0	30.711	-0.109053	0.029355	22.9957	22.7369	19.9187	23.0696	22.4035	20.5054
sll1626	LexA	Transcription regulator LexA	203	22.744	1	2	8.4	3	0	12.698	-0.115597	0.0262362	18.017	21.4136	19.7474	18.5438	18.9422	22.0387
slr1655	PsaL	Photosystem I reaction center subunit XI	157	16.624	1	4	30.6	35	0	85.757	-0.130891	0.255254	27.7363	28.0551	27.9984	27.8509	27.9156	28.4159
sll0819	PsaF	Photosystem I reaction center subunit III	165	18.249	1	10	46.1	64	0	137.44	-0.135529	0.654585	28.8521	28.9192	28.9518	29.0307	28.8958	29.2032
slr0628	RpsN	30S ribosomal protein S14	100	11.854	1	3	25	9	0	19.042	-0.140017	0.497454	23.3159	23.1719	23.3926	23.2291	23.5731	23.4983
slr0338	Slr0338	probable oxidoreductase	356	39.042	1	2	6.7	2	0	12.136	-0.147596	0.0536908	17.9933	20.5111	19.3642	19.0984	18.5986	20.6144
sll0576	Sll0576	HrEpiB	312	34.951	1	5	17	17	0	44.998	-0.151078	0.250816	22.4449	22.2671	22.4373	22.9815	22.2062	22.4149
slr0821	Slr0821	hypothetical protein	91	9.7249	1	2	24.2	6	0	18.074	-0.152885	0.0378984	18.3009	17.5745	21.8608	18.9742	19.139	20.0817
slr1469	RnpA	Ribonuclease P protein component	124	14.498	1	2	16.9	2	0	11.227	-0.154729	0.0585082	20.4139	17.5593	19.7034	19.1625	18.9704	20.0079
slr1835	PsaB	Photosystem I P700 chlorophyll a apoprotein A2	731	81.291	1	9	11.4	50	0	142.62	-0.158068	0.272074	27.7708	27.6292	27.1683	27.5723	27.5015	27.9687
ssr1604	RpmB	50S ribosomal protein L28	78	8.9934	1	6	53.8	14	0	39.489	-0.158973	0.245498	23.566	24.1555	24.0519	24.0826	23.7716	24.3962
slr1102	Slr1102	Slr1102 protein	853	96.638	1	32	36.8	142	0	323.31	-0.159916	0.265946	27.6318	27.5095	27.9971	27.6197	27.7526	28.2458
sll1769	Sll1769	Thylakoid protein sll1769	105	11.558	1	1	8.6	3	0	6.8418	-0.16128	0.0710365	18.3476	20.6636	18.9404	19.3385	18.8904	20.2066
slr1857	GlgX	1,4-alpha-glucan branching enzyme	707	79.894	1	2	2.4	4	0	12.49	-0.164825	0.0741026	18.2497	20.3729	19.2721	19.2618	18.7445	20.383
sll0170	DnaK2	Chaperone protein DnaK2	636	67.613	1	19	33.3	75	0	197.65	-0.170319	0.346832	25.773	25.6555	25.6412	26.1246	25.9863	25.4697
slr1970	Slr1970	Slr1970 protein	173	19.451	1	1	4.6	1	0	6.4751	-0.177292	0.107674	18.6831	18.8108	19.6726	18.9376	18.5405	20.2204
slr0737	PsaD	Photosystem I reaction center subunit II	141	15.644	1	10	55.3	53	0	120.82	-0.18023	1.09581	29.0072	28.96	29.2041	29.2241	29.2116	29.2763
sll0227	Sll0227	Probable peptidyl-prolyl cis-trans isomerase sll0227	246	26.58	1	4	26	14	0	30.342	-0.18055	0.0468206	22.2301	22.4492	19.3241	22.2599	22.4716	19.8135
sll1435	Sll1435	glutamyl-tRNA(Gln) amidotransferase subunit B	519	57.605	1	1	2.5	2	0	8.2522	-0.181163	0.116441	18.2332	19.1988	19.7528	18.9409	18.8457	19.9417
sll0080	ArgC	N-acetyl-gamma-glutamyl-phosphate reductase	351	38.209	1	1	2.6	4	0	7.1292	-0.182486	0.0956016	18.8456	18.2323	19.9199	18.8605	18.5739	20.1109
sll1098	FusB	Elongation factor G 2	691	75.43	1	2	2.5	3	0	11.732	-0.187765	0.0650221	20.5522	17.4511	19.5169	19.075	18.8124	20.1961
sll1239	Sll1239	Sll1239 protein	178	20.608	1	1	6.2	2	0.0018975	6.4438	-0.188265	0.059445	20.8279	17.3501	19.9366	19.3623	19.0945	20.2226
sll0934	CcmA	Carboxysome formation protein	351	37.633	1	2	6	7	0	13.924	-0.190391	0.0522859	21.3625	17.1672	19.4458	19.111	19.2992	20.1364
sll1533	PilT	Twitching mobility protein	428	47.898	1	2	4.7	4	0	10.743	-0.196731	0.0797042	20.1087	17.7184	19.4647	18.9618	18.6462	20.2738
slr0670	Slr0670	Slr0670 protein	291	32.676	1	2	8.6	5	0	16.159	-0.196871	0.0659964	20.3039	17.2616	19.7982	18.7773	18.9842	20.1928
slr1702	Slr1702	Slr1702 protein	251	27.287	1	1	5.2	2	0	6.7365	-0.199464	0.125024	18.6049	18.244	19.9176	19.0936	18.6391	19.6322
sll1418;chr1_246215	Sll1418	Sll1418 protein	188;205	20.747	2	4;4	28.7	13	0	33.459	-0.203586	0.106247	21.2866	21.6693	19.9529	21.7213	21.5283	20.2699
slr0146;chr1_97004	Slr0146	Slr0146 protein	170;188	19.69	2	1;1	7.6	2	0	8.469	-0.203712	0.100324	18.1663	19.757	19.6896	19.0086	18.7923	20.4233
sll1867;slr1311;slr1181	PsbA2	Photosystem II protein D1 2	360;360;360	39.721	3	5;5;2	15	30	0	80.174	-0.204868	0.332316	25.8812	25.8243	25.1143	25.7016	25.8214	25.9115
sll1757	Sll1757	Sll1757 protein	292	31.717	1	1	3.8	3	0	9.4272	-0.205316	0.16686	18.8516	19.4502	19.1895	19.2069	18.718	20.1823
chr1_309173	Chr1_309173	chr1_309173 Hypothetical protein [179192 - 179139]	18	1.9663	1	1	55.6	4	0.007286	6.0995	-0.214607	0.111499	18.291	20.2305	19.8871	19.4205	19.2374	20.3945
ssl0563	PsaC	Photosystem I iron-sulfur center	81	8.8282	1	6	65.4	19	0	69.358	-0.215849	0.447986	27.8836	28.0182	28.3624	28.0035	28.4679	28.4404
sll0172	Sll0172	Sll0172 protein	152	16.347	1	1	11.8	3	0	9.1702	-0.216341	0.122715	18.2448	19.827	19.5841	19.0042	19.0342	20.2664
sll1891	Sll1891	Sll1891 protein	252	26.435	1	1	5.2	3	0	6.7507	-0.220759	0.0875273	19.4405	17.2901	19.5329	18.3736	18.5512	20.0009
slr1934	PdhA	Pyruvate dehydrogenase E1 component subunit alpha	342	38.158	1	1	2.3	4	0.0055249	6.1979	-0.227724	0.0775077	17.9416	17.8139	20.6163	18.9475	18.2153	19.8922
sll1824	Sll1824	50S ribosomal protein L25	118	13.442	1	5	42.4	16	0	36.403	-0.229122	0.502819	23.334	23.8198	23.8846	23.7824	23.8431	24.1004
slr1046	TatA	Sec-independent protein translocase protein TatA	126	13.673	1	1	13.5	2	0	6.7266	-0.229148	0.161807	18.5276	20.1365	19.5182	19.4342	19.3126	20.123
sll1536	MoeB	Molybdopterin biosynthesis MoeB protein	392	42.759	1	4	14.8	5	0	33.742	-0.230228	0.0475146	22.3905	17.4499	19.5798	21.3765	18.4867	20.2476
slr2136	IspG	4-hydroxy-3-methylbut-2-en-1-yl diphosphate synthase (ferredoxin)	403	44.175	1	1	2.2	1	0.0090253	6.0126	-0.23687	0.139366	18.0557	19.954	19.4352	19.1323	19.093	19.9302
slr1853	Slr1853	Slr1853 protein	113	12.111	1	2	18.6	2	0	16.463	-0.239483	0.151829	18.3117	19.1722	19.9683	19.0996	18.9972	20.0739
sll0067	Gst	Glutathione S-transferase	184	20.377	1	1	6	1	0.0037594	6.3207	-0.242406	0.160413	18.2337	20.0911	18.9923	19.0645	19.3078	19.6721
sll0086	Sll0086	Putative arsenical pump-driving ATPase	396	44.626	1	1	2.5	2	0	7.5458	-0.244499	0.143662	18.284	19.7467	19.8689	19.3196	19.0397	20.2738
sll1740	RplS	50S ribosomal protein L19	122	13.786	1	7	45.9	32	0	59.491	-0.246873	0.639366	25.2562	25.4702	25.5717	25.6167	25.4618	25.9603
sll1812	RpsE	30S ribosomal protein S5	173	18.241	1	12	76.3	58	0	146.84	-0.247088	0.637504	26.746	26.4674	26.8454	26.8264	26.7754	27.1983
slr1884	TrpS	Tryptophan--tRNA ligase	337	37.763	1	15	35.6	74	0	167.43	-0.247365	0.369024	27.1372	26.6742	26.8847	26.7862	27.0344	27.6176
sll0927;chr1_302301	Sll0927	S-adenosylmethionine synthetase;chr1_302301 Hypothetical protein [341047 - 339740]	409;436	43.898	2	4;4	8.8	11	0	28.697	-0.253711	0.104317	22.1954	21.6991	19.3571	21.3256	21.4035	21.2835
slr1834	Slr1834	P700 apoprotein subunit Ia	751	82.935	1	14	14.5	63	0	131.14	-0.253904	1.51093	28.5347	28.5354	28.3029	28.7134	28.699	28.7224
slr2101	Slr2101	Slr2101 protein	143	15.348	1	1	6.3	2	0	7.0398	-0.2548	0.0899738	20.2883	17.0986	19.5221	18.9648	18.8804	19.8281
slr0148	Slr0148	hypothetical protein	160	17.823	1	1	5	2	0	6.499	-0.261587	0.0780805	20.7653	17.2169	19.1848	19.3405	18.2966	20.3146
slr1409	Slr1409	WD repeat-containing protein slr1409	326	35.759	1	6	23.3	15	0	47.603	-0.262414	0.0920244	22.0166	21.8881	19.7257	22.2141	22.1174	20.0862
ssr3451	PsbE	Cytochrome b559 subunit alpha	81	9.4485	1	3	46.9	12	0	44.457	-0.263592	0.271408	24.7616	24.8753	23.721	24.5198	24.671	24.9579
slr1356	Rps1A	30S ribosomal protein S1 homolog A	328	36.57	1	12	30.5	53	0	109.75	-0.268462	0.702288	25.5963	25.5591	25.8577	25.7603	25.8275	26.2307
slr1600	Slr1600	Slr1600 protein	149	17.13	1	1	7.4	4	0	10.124	-0.269414	0.159174	18.4875	19.6034	19.6786	19.0475	18.9952	20.535
sll1244	RplI	50S ribosomal protein L9	152	16.641	1	7	46.7	36	0	104.16	-0.276453	0.398228	26.0999	26.1376	26.9291	26.548	26.5535	26.8945
sll1744	RplA	50S ribosomal protein L1	238	25.852	1	20	79	117	0	323.31	-0.279868	0.330816	28.1423	28.1908	29.0748	28.5121	28.6521	29.0833
sll1260	RpsB	30S ribosomal protein S2	269	30.15	1	11	29.7	45	0	93.379	-0.283945	1.14435	25.6441	25.4383	25.6051	25.8006	25.7041	26.0347
ssl2296	Ssl2296	Putative pterin-4-alpha-carbinolamine dehydratase	96	10.734	1	4	77.1	39	0	177.83	-0.285597	0.29476	28.1801	28.2594	28.7633	28.499	28.2006	29.3599
slr1161	Slr1161	Slr1161 protein	199	22.952	1	1	5	3	0	7.3978	-0.296379	0.107534	20.058	17.1095	19.4262	18.6706	18.7891	20.0232
sll0058	DnaK1	Chaperone protein dnaK1	692	75.178	1	1	1.3	1	0.0072595	6.0893	-0.296464	0.194393	19.6737	18.0143	19.1197	18.745	19.1073	19.8448
slr1590	Slr1590	Slr1590 protein	295	32.604	1	2	6.4	4	0	11.493	-0.297421	0.195456	18.1228	19.6517	19.7277	19.2927	19.1236	19.9782
sll0145	Frr	Ribosome-recycling factor	182	20.186	1	3	15.9	12	0	32.207	-0.304346	0.100734	22.8177	22.8987	19.6845	22.5705	21.9686	21.7749
sll1806	RplN	50S ribosomal protein L14	122	13.294	1	7	53.3	39	0	67.411	-0.306404	0.406807	24.7473	25.0809	25.498	25.209	25.1535	25.8829
ssr2857	Ssr2857	Ssr2857 protein	64	6.6855	1	1	17.2	3	0	9.5269	-0.308736	0.101023	18.3015	17.3595	20.871	18.9272	18.7429	19.7883
sll1750;chr1_292135	UreC	Urease subunit alpha	569;587	61.037	2	1;1	2.5	2	0	7.4332	-0.309502	0.180973	18.0528	18.755	19.6411	19.323	18.2473	19.8071
sll1275	Pyk2	Pyruvate kinase 2	591	62.985	1	1	2	2	0	7.8618	-0.312882	0.304138	18.441	19.4343	19.4201	18.8976	19.6065	19.7299
slr1604	FtsH3	ATP-dependent zinc metalloprotease FtsH 3	616	67.25	1	3	5.4	3	0	13.975	-0.314833	0.159504	18.0206	19.8761	19.7667	18.828	19.4593	20.3205
sll1810	RplF	50S ribosomal protein L6	179	19.666	1	8	50.3	47	0	133.32	-0.322274	0.897858	25.1745	25.1299	25.413	25.3768	25.4658	25.8417
slr1761	YtfC	Peptidyl-prolyl cis-trans isomerase	201	21.555	1	4	24.9	14	0	39.118	-0.323796	0.0919517	22.7881	22.9597	19.5764	23.1254	22.1373	21.0328
sll0319	Sll0319	Sll0319 protein	297	32.315	1	1	3.7	2	0	10.006	-0.324181	0.195467	18.2554	19.7489	19.8181	19.1713	19.2632	20.3604
slr1720	AspS	Aspartate--tRNA(Asp/Asn) ligase	599	67.209	1	3	5.5	5	0	21.255	-0.328781	0.166983	21.0309	21.4565	19.5961	21.4655	21.5484	20.0558
slr0925	Ssb	Single-stranded DNA-binding protein 1	121	13.656	1	2	16.5	7	0	13.921	-0.333117	0.0911096	18.282	17.1945	21.3468	19.0385	18.7504	20.0338
slr0447	AmiC	Negative aliphatic amidase regulator	446	48.359	1	5	18.8	21	0	64.787	-0.334469	0.304105	23.7867	23.9409	23.2289	24.5937	24.1126	23.2536
sll1096	RpsL	30S ribosomal protein S12	126	14.176	1	6	48.4	26	0	109.8	-0.334806	1.18578	26.3099	26.1789	26.441	26.4467	26.6647	26.8229
slr0164	ClpR	Putative ATP-dependent Clp protease proteolytic subunit-like	225	24.881	1	3	13.3	11	0	30.523	-0.336489	0.120692	21.9281	21.6941	19.3978	21.8472	22.0697	20.1125
sll0534;slr0542	ClpP2	ATP-dependent Clp protease proteolytic subunit 2	226;198	24.823	2	2;1	12.8	1	0	12.334	-0.347787	0.084875	17.9818	17.7538	21.9718	19.5369	18.7723	20.4416
sll1803	RplV	50S ribosomal protein L22	121	13.502	1	6	64.5	22	0	71.165	-0.348407	0.636877	25.2602	25.4366	25.8598	25.6201	25.7864	26.1953
sll0533	Tig	Trigger factor	471	52.61	1	4	8.5	11	0	34.663	-0.352269	0.119661	22.9472	22.6594	19.6303	22.2544	22.2636	21.7757
sll1825	Sll1825	hypothetical protein	196	20.301	1	2	10.2	4	0	13.468	-0.352376	0.242064	18.3218	19.4716	19.1905	18.7223	19.0784	20.2404
ssr1600	Ssr1600	similar to anti-sigma f factor antagonist	116	12.661	1	1	9.5	5	0	10.201	-0.355309	0.105212	18.1019	17.8689	21.2977	19.1412	18.7574	20.4358
ssr1399	RpsR	30S ribosomal protein S18	71	8.3808	1	11	71.8	55	0	87.781	-0.35979	0.335992	28.2795	28.6371	29.6616	29.07	29.0597	29.5278
slr1900	Slr1900	Slr1900 protein	247	27.406	1	1	4.5	2	0	7.85	-0.362727	0.206124	17.7572	19.4643	19.4977	19.0585	18.771	19.9778
slr1678	RplU	50S ribosomal protein L21	124	13.669	1	10	69.4	42	0	153.66	-0.363748	0.629938	26.3336	26.4538	26.7064	26.5499	26.7114	27.3238
slr1735	Slr1735	ABC transporter	252	28.017	1	2	7.1	2	0	13.73	-0.365138	0.175746	19.6385	17.6263	19.8518	19.1148	19.0079	20.0893
sll1742	NusG	Transcription termination/antitermination protein NusG	205	23.416	1	2	10.2	2	0	11.851	-0.366536	0.148023	19.6954	17.6339	20.0515	19.2453	18.7239	20.5113
sml0006	RpmJ	50S ribosomal protein L36	38	4.4555	1	1	26.3	4	0	7.7862	-0.375781	0.461398	18.3233	19.3588	19.1249	19.0179	19.3497	19.5667
slr0823	Ycf3	Photosystem I assembly protein Ycf3	173	19.878	1	3	16.2	7	0	19.561	-0.376115	0.165998	18.3903	20.9159	19.8995	20.7843	19.2925	20.2573
sll1808	Sll1808	50S ribosomal protein L5	200	22.508	1	12	55.5	64	0	117.8	-0.377761	0.528756	26.6907	26.6968	27.2775	26.9835	27.0564	27.7585
slr0659	PrlC	oligopeptidase A	713	80.296	1	1	1.4	2	0.0055147	6.194	-0.378318	0.211607	18.4345	17.8328	19.7557	19.0775	18.3516	19.7289
slr5119;sll6076;sll6017;slr5077;sll1201;slr5124;slr5082	Slr5119	Slr5119 protein	256;256;256;260;264;276;276	29.502	7	1;1;1;1;1;1;1	4.3	1	0	8.9338	-0.382955	0.228529	19.1837	17.8016	19.3132	18.8407	18.5832	20.0236
slr0879	GcvH	Glycine cleavage system H protein	132	14.58	1	1	7.6	2	0.009009	6.011	-0.39041	0.152817	19.3915	16.9873	19.6591	18.9943	18.358	19.8569
sll1654	Sll1654	hypothetical protein	136	14.554	1	1	12.5	1	0	12.364	-0.392316	0.147409	20.4547	17.6162	19.3955	19.1417	18.8789	20.6228
slr0886	FabG	3-oxoacyl-[acyl-carrier-protein] reductase	247	25.723	1	3	13	13	0	24.383	-0.395009	0.115775	22.3116	22.2873	18.9619	22.4405	21.7411	20.5641
slr0161	PilT	Twitching motility protein	369	40.615	1	2	7	2	0	16.452	-0.397419	0.200362	18.9429	17.4716	19.7243	18.5384	18.9517	19.841
slr0417	GyrA	DNA gyrase subunit A	860	95.072	1	1	0.9	2	0	6.5585	-0.401409	0.281786	18.2926	19.2287	19.535	19.1799	18.8157	20.2649
sll1811	RplR	50S ribosomal protein L18	120	13.204	1	5	39.2	30	0	106.78	-0.401845	0.487108	26.1854	26.0826	26.915	26.3402	26.8664	27.182
slr0483;chr1_115955	Slr0483	Slr0483 protein	149;162	16.885	2	4;4	21.5	16	0	31.419	-0.402127	0.119988	23.1613	23.242	19.8173	23.2846	22.4824	21.66
slr2049	CpcS2	Chromophore lyase CpcS/CpeS 2	192	21.946	1	1	5.7	3	0	7.8409	-0.404179	0.228025	18.1236	20.2154	18.9026	18.9546	19.4086	20.0909
slr1044	McpA	Methyl-accepting chemotaxis protein	869	93.209	1	3	3.7	14	0	22.28	-0.40542	0.200314	20.9348	21.4078	18.9867	21.064	21.1175	20.3641
sll0395	Sll0395	Sll0395 protein	212	23.752	1	10	40.6	35	0	93.333	-0.406464	1.40416	24.6943	24.6968	24.8332	24.9212	25.1626	25.3599
slr1886	RsfS	Ribosomal silencing factor RsfS	154	17.09	1	1	5.2	2	0	6.74	-0.408027	0.134702	20.0425	17.1901	19.8593	18.8285	18.7882	20.6992
ssl1498	Ssl1498	Ssl1498 protein	61	6.3993	1	1	14.8	5	0	6.9009	-0.413649	0.142606	18.6662	17.219	20.7106	18.7265	19.1505	19.9598
sll1323	AtpF2	ATP synthase subunit b	143	16.245	1	4	24.5	14	0	49.912	-0.414199	2.26981	23.8	23.6751	23.5871	24.1826	24.0882	24.034
sll0757	PurF	Amidophosphoribosyltransferase	495	53.67	1	2	6.1	2	0	10.637	-0.417328	0.158685	19.9958	17.3595	19.5318	18.9527	18.6985	20.4878
slr1251	Slr1251	peptidyl-prolyl cis-trans isomerase	170	18.404	1	4	28.8	9	0	48.158	-0.42466	0.0921228	22.7358	17.9476	22.345	22.2396	21.7718	20.291
slr1239	PntA	proton-translocating NAD(P)(+) transhydrogenase	530	56.049	1	1	2.1	2	0.0073394	6.1481	-0.425741	0.221285	17.6072	19.7633	19.4532	19.018	19.0525	20.0304
sll1767	RpsF	30S ribosomal protein S6	113	13.237	1	11	66.4	61	0	209.81	-0.426363	0.45869	28.2171	28.7674	29.4779	28.9771	29.2132	29.5512
slr1573	Slr1573	hypothetical protein	262	29.113	1	1	3.4	1	0.0089445	5.9388	-0.427341	0.532709	18.7154	18.7075	19.2766	19.305	18.8205	19.856
smr0010	PetG	Cytochrome b6-f complex subunit 5	38	4.175	1	1	21.1	5	0	7.3968	-0.428498	0.170372	18.3054	17.5137	20.4202	18.8008	18.7721	19.9519
slr1124	Slr1124	phosphoglycerate mutase	443	49.344	1	3	9.5	11	0	22.468	-0.429362	0.190213	21.6981	21.2486	19.1928	21.4145	21.6393	20.3738
sll1804	RpsC	30S ribosomal protein S3	240	27.147	1	16	64.2	61	0	130.99	-0.43186	1.65683	25.7961	25.751	26.0489	26.2734	26.1822	26.4359
slr0877	GatA	Glutamyl-tRNA(Gln) amidotransferase subunit A	483	51.47	1	1	2.7	1	0.0037106	6.261	-0.436199	0.277713	17.9819	19.5587	19.8134	19.4513	19.1547	20.0566
sll1837	Sll1837	Sll1837 protein	145	15.467	1	1	8.3	2	0	10.143	-0.446207	0.306409	19.672	17.9925	19.3663	19.3818	18.9922	19.9954
sll1802	RplB	50S ribosomal protein L2	276	30.433	1	17	48.6	93	0	188.92	-0.449916	0.583981	27.5058	27.7482	28.3706	28	28.211	28.7633
slr1703	SerS	Serine--tRNA ligase	430	48.037	1	1	1.9	3	0.0072727	6.0962	-0.45143	0.288157	18.2554	19.931	19.7475	19.2889	19.5656	20.4337
sll1821	RplM	50S ribosomal protein L13	151	16.99	1	10	77.5	56	0	111.14	-0.453193	0.992601	27.1882	27.3657	27.6228	27.6193	27.7316	28.1853
sll0767	RplT	50S ribosomal protein L20	117	13.553	1	5	36.8	29	0	99.359	-0.455241	0.429694	26.3769	26.5402	27.7169	27.0315	27.3703	27.598
slr0343	PetD	Cytochrome b6-f complex subunit 4	160	17.444	1	1	8.8	6	0	6.9015	-0.458885	0.123392	18.0608	17.4387	21.5448	18.8632	19.1728	20.385
sll1030	CcmL	Carboxysome shell vertex protein CcmL	100	10.638	1	1	10	2	0	6.7704	-0.460717	0.273187	18.1665	19.3197	19.3984	18.7455	19.017	20.5042
slr0244	Slr0244	Slr0244 protein	284	31.204	1	7	28.5	14	0	48.19	-0.461035	0.12123	23.2121	23.0855	19.0105	22.1594	22.5159	22.0159
sll1883	ArgJ	Arginine biosynthesis bifunctional protein ArgJ	413	43.32	1	4	11.4	8	0	29.046	-0.462557	0.363414	20.5728	20.7097	19.1453	20.9511	20.3523	20.512
ssl3044	Ssl3044	Hydrogenase component	99	10.818	1	1	12.1	5	0	12.209	-0.465605	0.227663	18.2764	17.525	20.0234	19.0695	18.5474	19.6046
sll0601	Nit1	Deaminated glutathione amidase	272	30.191	1	2	9.2	5	0	12.383	-0.470043	0.272093	18.5672	18.0174	19.849	18.9276	18.7791	20.137
ssl1784	RpsO	30S ribosomal protein S15	89	10.373	1	9	69.7	68	0	112.39	-0.474765	0.525231	28.6515	29.0401	29.8702	29.4392	29.5513	29.9956
sll0480	DapL	LL-diaminopimelate aminotransferase	412	45.087	1	7	21.4	15	0	52.556	-0.476559	0.107613	22.1703	17.4484	19.331	18.627	21.4544	20.298
sll1801	RplW	50S ribosomal protein L23	101	11.526	1	10	80.2	56	0	99.007	-0.482145	0.998082	26.7369	26.856	27.4001	27.4803	27.3092	27.6499
slr1944	Slr1944	Slr1944 protein	538	58.685	1	1	1.5	3	0	6.836	-0.488717	0.254062	17.8712	19.8927	19.4896	19.0968	19.1515	20.4714
slr0557	ValS	Valine--tRNA ligase	910	102.74	1	2	2	4	0	13.141	-0.507423	0.250323	19.6084	17.5449	19.4035	18.7984	19.002	20.2786
slr0398	Slr0398	unknown protein	157	17.633	1	1	6.4	2	0.0055351	6.2148	-0.517972	0.380875	18.6135	19.1289	19.5315	19.4653	18.8138	20.5488
slr1783	Slr1783	two-component response regulator NarL subfamily	282	31.395	1	1	3.2	0	0.0018868	6.3871	-0.519464	0.40837	18.1756	19.7156	18.8392	19.515	18.8648	19.909
slr0924;chr1_123830	Slr0924	periplasmic protein, function unknown;chr1_123830 Hypothetical protein [2798553 - 2799470]	242;306	26.113	2	4;4	25.2	10	0	40.082	-0.531108	0.090051	22.9634	17.7111	19.9924	23.5248	18.6444	20.0911
FLAG	3xFLAG peptide	Cleaved 3xFLAG peptide	19	2.3242	1	5	100	201	0	323.31	-0.532967	0.0659096	34.4139	33.0784	25.7079	33.1647	30.8274	30.8071
slr1417	Slr1417	Uncharacterized protein slr1417	118	12.929	1	1	8.5	1	0.009058	6.024	-0.535299	0.348475	18.3097	19.2699	19.357	18.7031	19.2971	20.5423
ssl3436	RpmC	50S ribosomal protein L29	73	8.5455	1	10	94.5	49	0	174.2	-0.535364	0.788186	26.5986	27.0443	27.4432	27.355	27.3796	27.9576
sll1799	RplC	50S ribosomal protein L3	213	22.741	1	15	52.6	85	0	203.47	-0.536954	0.63558	26.9543	27.1336	28.0831	27.7301	27.8307	28.221
sll1822	RpsI	30S ribosomal protein S9	137	15.086	1	12	75.9	55	0	279.48	-0.54098	2.03642	27.5896	27.6952	27.6276	28.0125	28.3878	28.135
slr2001	CphB	Cyanophycinase	271	29.389	1	1	4.8	3	0	8.2212	-0.542656	0.320212	18.1897	20.3508	19.2183	19.2559	19.8182	20.3126
ssr0482	RpsP	30S ribosomal protein S16	82	9.5561	1	9	79.3	72	0	98.466	-0.557665	0.531619	27.7589	28.2641	29.1406	28.574	28.9113	29.3514
slr1784	BvdR	Biliverdin reductase	328	36.64	1	7	26.2	25	0	68.135	-0.558061	0.713352	23.2535	23.1099	23.9563	23.5829	23.9843	24.4266
sll1058	DapB	4-hydroxy-tetrahydrodipicolinate reductase	275	29.09	1	2	8	5	0	10.923	-0.561191	0.161888	21.2478	17.4932	19.657	21.1972	18.726	20.1584
slr0469	RpsD	30S ribosomal protein S4	202	23.183	1	21	72.8	127	0	305.23	-0.567027	0.677034	28.1359	28.4458	29.2112	28.788	29.2064	29.4996
slr1367	GlgP	Alpha-1,4 glucan phosphorylase	855	98.304	1	2	3.3	3	0	13.63	-0.570359	0.251821	19.2515	16.9849	19.6351	19.1163	18.6289	19.8373
sll1185	HemF	Oxygen-dependent coproporphyrinogen-III oxidase	340	38.937	1	2	7.1	8	0	14.365	-0.572006	0.168796	18.603	21.8553	19.1287	21.9563	19.3191	20.0277
slr0731	Slr0731	Slr0731 protein	402	44.716	1	1	2.5	2	0	7.1675	-0.572039	0.311179	19.4208	17.4027	19.2874	19.0404	18.781	20.0056
sll0518	Sll0518	Sll0518 protein	385	43.118	1	11	28.6	33	0	98.53	-0.573634	0.747325	24.7399	23.9568	24.7068	24.7713	24.8276	25.5254
slr0942	Slr0942	Aldo/keto reductase slr0942	327	36.014	1	1	4	3	0	10.702	-0.585313	0.489015	18.1787	19.2875	19.3555	19.4754	18.9374	20.1649
sll1800	RplD	50S ribosomal protein L4	210	23.356	1	9	47.6	43	0	166.4	-0.592201	0.654995	27.0344	27.7457	28.2766	27.9798	28.2098	28.6437
slr0528;chr1_141269	MurE	UDP-N-acetylmuramoyl-L-alanyl-D-glutamate--2,6-diaminopimelate ligase	505;560	54.6	2	1;1	2.4	1	0	6.8478	-0.595447	0.461083	18.3733	17.8662	19.3419	19.0409	18.5583	19.7685
sll0379	Sll0379	acyl-[acyl-carrier-protein]--UDP-N-acetylglucosamine o-acyltransferase	295	32.073	1	1	3.1	2	0.0055453	6.2285	-0.596926	0.286307	18.2389	18.433	19.5483	18.8349	18.3898	20.7862
sll0158	GlgB	1,4-alpha-glucan branching enzyme GlgB	770	89.526	1	19	31.4	72	0	210.54	-0.605088	2.30946	26.6161	26.4746	26.4677	26.9738	27.0969	27.303
sll1809	RpsH	30S ribosomal protein S8	133	14.666	1	13	88.7	137	0	216.31	-0.609189	0.646902	28.9153	29.1977	30.1829	29.7592	29.9806	30.3836
sll0019	Dxr	1-deoxy-D-xylulose 5-phosphate reductoisomerase	394	42.532	1	1	2.8	3	0.0037244	6.2704	-0.628336	0.394722	18.3052	19.5607	19.4213	19.0321	19.3463	20.7938
sll1785	Sll1785	Sll1785 protein	268	30.011	1	2	9.7	6	0	13.075	-0.631688	0.598926	20.2989	20.1214	19.2454	20.9061	20.8157	19.8389
slr1140	Slr1140	3-amino-5-hydroxybenzoic acid synthase	378	41.559	1	11	38.6	45	0	144.97	-0.632992	0.612622	24.6749	24.1893	24.9148	25.0612	24.6097	26.0071
ssl2233	RpsT	30S ribosomal protein S20	97	10.702	1	8	55.7	57	0	129.85	-0.633233	1.14497	26.2854	26.714	26.9669	27.0953	27.1482	27.6225
slr1513	Slr1513	Membrane-associated protein slr1513	110	12.007	1	7	55.5	52	0	97.786	-0.634909	0.919418	27.4863	27.2127	26.6638	28.0615	27.8611	27.3449
slr0708	Slr0708	Slr0708 protein	402	44.68	1	2	9.2	3	0	10.965	-0.640334	0.32599	18.3451	17.3632	19.7024	18.3826	19.0526	19.8965
sll1817	RpsK	30S ribosomal protein S11	130	13.762	1	10	60.8	61	0	182.84	-0.645889	0.744222	26.086	26.5007	27.0819	26.7201	27.2162	27.6699
sll1816	RpsM	30S ribosomal protein S13	127	14.572	1	20	82.7	99	0	234.44	-0.646556	0.658594	27.8281	28.3439	29.1574	28.6585	29.2405	29.3701
ssl3432	RpsS	30S ribosomal protein S19	92	10.29	1	5	57.6	44	0	65.912	-0.652158	0.868493	26.6404	26.9144	27.6013	27.4309	27.5856	28.0962
sll1961	Sll1961	hypothetical protein	343	38.078	1	1	3.2	2	0.0037523	6.2936	-0.657941	0.422324	18.7861	17.499	19.3633	18.7087	18.98	19.9335
slr0884	Slr0884	glyceraldehyde 3-phosphate dehydrogenase 1 (NAD+)	354	37.919	1	2	5.1	2	0	12.298	-0.666318	0.558006	18.1158	18.9888	19.1278	18.9034	19.0745	20.2533
sll1813	RplO	50S ribosomal protein L15	147	15.194	1	7	57.1	39	0	114.58	-0.668111	1.31962	24.978	24.6912	25.4052	25.5743	25.5822	25.9223
slr1437	Slr1437	Slr1437 protein	112	12.671	1	1	11.6	3	0	6.5028	-0.675242	0.408134	18.7543	17.6028	19.4904	18.9179	18.7923	20.163
slr0606	Slr0606	Slr0606 protein	317	34.766	1	1	3.2	4	0	8.5106	-0.679849	0.291444	18.2191	17.8054	20.2101	18.7682	18.9189	20.5872
slr0426	FolE	GTP cyclohydrolase 1	234	26.639	1	1	7.3	2	0.0089286	5.938	-0.679875	0.302593	19.9004	17.3351	19.7406	19.1631	19.4308	20.4218
slr1909;chr1_27317	Slr1909	NarL subfamily	213;233	24.046	2	1;1	4.7	5	0	7.1654	-0.684522	0.247383	20.0962	16.8424	19.8412	19.1807	19.3982	20.2545
sll1583	Lig	DNA ligase	562	61.468	1	5	10.3	14	0	40.119	-0.690119	0.455802	22.2132	21.7084	20.0577	22.0771	22.0569	21.9156
sll1214	AcsF1	Magnesium-protoporphyrin IX monomethyl ester [oxidative] cyclase 1	358	42.153	1	1	3.4	1	0	7.8158	-0.693174	0.286372	18.3272	17.6539	20.2844	18.8451	18.8997	20.6003
sll1771	Sll1771	Sll1771 protein	254	28.472	1	1	3.9	1	0.0037453	6.2919	-0.704152	0.521874	18.78	18.1154	19.3718	18.7937	19.2213	20.3646
ssr1853	Ssr1853	Ssr1853 protein	95	10.902	1	4	53.7	29	0	76.401	-0.708896	0.980975	24.2961	24.0312	24.0755	24.4084	24.6336	25.4874
ssl1918	Ssl1918	Ssl1918 protein	97	11.332	1	1	7.2	4	0.0055556	6.2326	-0.725942	0.281802	20.0121	16.9061	19.4561	19.0672	19.165	20.3199
slr1470	Slr1470	Slr1470 protein	131	14.902	1	1	6.9	4	0.0090416	6.0131	-0.729972	0.411774	18.0801	17.7936	19.4112	18.5682	18.6187	20.2879
sll0020;slr1641	ClpC	ATP-dependent Clp protease regulatory subunit	821;872	91.173	2	4;2	5.1	10	0	28.982	-0.734622	0.326277	22.077	21.6508	19.1296	21.7302	21.8406	21.4904
sll1101	RpsJ	30S ribosomal protein S10	105	12.037	1	10	72.4	35	0	107.31	-0.738757	1.92539	25.6495	25.687	25.4719	26.0396	26.4312	26.5539
sll1097	RpsG	30S ribosomal protein S7	156	17.384	1	10	71.8	89	0	172.31	-0.741381	0.84713	27.6977	28.2316	28.6856	28.5148	28.8284	29.4958
sll1298	Sll1298	Putative carboxymethylenebutenolidase	246	26.941	1	2	11	3	0	14.913	-0.742057	0.493453	17.8623	19.9026	19.3971	19.5421	19.5876	20.2585
ssl2874	Ssl2874	Putative regulatory protein ssl2874	89	9.8693	1	2	15.7	9	0	17.774	-0.742147	0.458972	21.1939	21.4048	19.3341	20.9231	21.6611	21.5751
sll1796	PetJ	Cytochrome c6	120	12.463	1	1	7.5	3	0	12.797	-0.742163	0.357902	17.8204	17.6419	20.1146	18.8127	19.07	19.9207
slr1796	Slr1796	Thylakoid membrane protein slr1796	201	22.968	1	1	3.5	0	0.0089767	5.9915	-0.743497	0.475236	18.9568	17.5556	19.1364	18.9549	18.7228	20.2015
slr0376	Slr0376	Slr0376 protein	116	12.857	1	7	51.7	31	0	130.38	-0.743903	1.50185	24.6325	25.078	25.3944	25.7622	25.6832	25.8912
slr0543	TrpB	Tryptophan synthase beta chain	412	45.07	1	3	9.5	2	0	18.809	-0.748987	0.267491	21.4404	18.1177	19.1353	21.0929	19.2859	20.5616
slr1846	Slr1846	Uncharacterized monothiol glutaredoxin ycf64-like	107	11.94	1	1	10.3	2	0	7.4206	-0.749011	0.387321	18.4092	17.5096	20.0132	18.7538	19.4366	19.9886
sll1336	Sll1336	Sll1336 protein	705	78.327	1	2	2.7	4	0	15.52	-0.758259	0.40162	19.9783	17.4762	19.5569	19.573	19.5462	20.1669
slr0434	Efp	Elongation factor P	187	20.406	1	4	23	24	0	35.928	-0.761271	1.38428	24.0674	24.8361	24.4754	25.3444	24.9638	25.3547
sll1967	Sll1967	Uncharacterized RNA methyltransferase sll1967	463	51.522	1	9	21.6	40	0	72.269	-0.76137	0.876567	23.8655	23.4636	24.6223	24.4368	24.6287	25.17
sll0755	Sll0755	Putative peroxiredoxin sll0755	200	22.509	1	1	3.5	3	0.0037665	6.3584	-0.768951	0.504087	18.6133	17.8066	19.4011	18.566	19.3254	20.2365
sll1425;chr1_246784	ProS	Proline--tRNA ligase	603;618	66.929	2	2;2	4	3	0	15.789	-0.774525	0.3507	19.977	17.2099	19.1288	19.1681	19.098	20.3733
sll1958	Sll1958	histidinol phosphate aminotransferase	367	40.686	1	2	6	5	0	13.866	-0.776398	0.467148	18.3053	17.7538	19.8594	19.3826	18.8337	20.0314
sll1043	Pnp	Polyribonucleotide nucleotidyltransferase	718	77.83	1	38	54	155	0	323.31	-0.781991	2.07435	27.5014	27.1166	27.4413	28.0603	27.9953	28.3498
sll1226;chr1_242478	HoxH	Hydrogenase large subunit	474;502	52.917	2	2;2	4	3	0	11.247	-0.81278	0.895362	18.3754	18.3873	19.1907	19.3268	18.9802	20.0847
slr1165	Sat	Sulfate adenylyltransferase	390	43.695	1	5	14.4	11	0	30.169	-0.832204	0.339039	22.3743	21.8757	19.2308	22.2229	22.317	21.4375
slr0536	HemE	Uroporphyrinogen decarboxylase	350	39.152	1	3	8.3	7	0	25.692	-0.847241	0.308935	18.5253	21.7327	19.6586	21.5609	21.283	19.6144
sll1807	Sll1807	50S ribosomal protein L24	105	11.707	1	10	72.4	50	0	145.4	-0.847617	1.37661	26.0887	26.1009	26.855	27.0334	27.0888	27.4651
ssl2717	Ssl2717	Ssl2717 protein	70	7.9208	1	1	20	1	0.007326	6.1264	-0.873367	0.574169	19.011	17.5848	19.3855	19.1576	19.1168	20.3271
sll0923	EpsB	Exopolysaccharide export protein	756	83.64	1	1	1.1	3	0	6.4854	-0.88888	0.6556	18.0653	18.2475	19.2617	19.1985	18.6972	20.3454
sll0430	HtpG	Heat shock protein	658	75.029	1	2	3.6	2	0	10.729	-0.90269	0.778504	18.6793	18.3594	19.5313	19.0082	19.876	20.3939
sll0712	CysM	Cysteine synthase	325	34.734	1	1	3.1	5	0	7.5918	-0.909011	0.477473	18.0567	17.5728	19.7409	18.7729	18.9624	20.362
ssl0020	PetF	Ferredoxin-1	97	10.363	1	1	7.2	5	0	6.6205	-0.912507	0.383575	18.1148	17.4414	20.5801	19.4457	19.2139	20.2142
slr0013	Slr0013	Slr0013 protein	175	18.69	1	2	14.3	8	0	15.866	-0.928328	0.487451	18.2539	17.5127	19.6982	18.9634	18.8232	20.4632
slr0809	RfbB	UDP-glucuronate decarboxylase	328	36.942	1	1	2.4	3	0.0018904	6.4092	-0.929289	0.418505	18.1442	17.4977	20.213	18.9854	19.169	20.4884
ssl3437	RpsQ	30S ribosomal protein S17	81	9.2887	1	12	74.1	114	0	247.02	-0.946445	0.944121	28.1905	28.6828	29.6585	29.4949	29.7484	30.1279
sll1530	Sll1530	Sll1530 protein	386	43.745	1	2	6.5	4	0	17.368	-0.954384	0.557517	18.7977	16.9586	19.3644	19.0713	19.1448	19.7677
sll0422	Sll0422	Isoaspartyl peptidase/L-asparaginase	329	34.894	1	2	7	5	0	15.209	-0.970907	0.749248	18.4011	18.0614	19.1425	18.5037	20.0663	19.9478
slr0041;chr1_140658	CmpB	Bicarbonate transport system permease protein CmpB	280;288	31.023	2	1;1	3.2	1	0	7.1541	-0.984882	0.394292	18.2108	17.1067	20.4767	19.4654	19.0281	20.2555
slr1870	Slr1870	Slr1870 protein	249	27.693	1	5	22.1	19	0	47.053	-1.01937	0.924511	23.6728	23.2982	24.6966	24.7186	24.5084	25.4988
sll0596	Sll0596	Sll0596 protein	244	26.325	1	9	52.9	33	0	91.802	-1.02883	1.4242	25.0523	24.6603	25.6489	25.8021	26.294	26.3518
sll0098	RlmN	Probable dual-specificity RNA methyltransferase RlmN	350	38.856	1	2	6.3	5	0	14.771	-1.03104	0.334812	20.811	17.6281	19.7736	21.1512	18.7272	21.4274
sll0289	MinD	Septum site-determining protein MinD	266	29.047	1	1	4.9	3	0	6.4725	-1.04724	0.636915	18.7763	17.4331	19.3955	18.9045	19.3745	20.4676
sll1443;chr1_232675	Sll1443	CTP synthetase;chr1_232675 Hypothetical protein [1892131 - 1890464]	546;556	60.807	2	1;1	1.5	0	0.0037313	6.2717	-1.08859	0.728367	18.0192	17.9025	19.3888	18.5769	20.2173	19.7822
slr0613	Slr0613	Slr0613 protein	173	18.297	1	1	5.8	5	0.0037175	6.2657	-1.08863	0.900106	18.2329	17.657	19.5076	19.3361	19.515	19.8125
slr0058;chr1_114476	Slr0058	Slr0058 protein	142;148	16.485	2	1;1	7	2	0	8.5106	-1.11589	0.566916	18.2447	17.3454	19.4895	18.3107	19.7151	20.4015
slr1265	RpoC1	DNA-directed RNA polymerase subunit gamma	626	70.977	1	6	10.4	16	0	49.423	-1.11672	0.387317	23.0854	22.5997	19.2415	22.5205	22.8371	22.9191
sll0065	IlvH	Acetolactate synthase small subunit	172	18.871	1	1	5.8	1	0	7.5427	-1.12078	0.542969	17.9581	17.145	19.6054	18.7849	18.8194	20.4665
slr0710	GdhA	NADP-specific glutamate dehydrogenase	428	47.312	1	2	4.9	5	0	12.172	-1.14321	0.532918	18.4625	17.4638	19.8748	18.4807	20.5076	20.2425
sll0224	Sll0224	Sll0224 protein	298	32.829	1	3	13.4	6	0	25.667	-1.15063	0.553239	18.5618	17.2377	20.0131	19.796	18.9485	20.52
sll1270	GlnH/glnP	Glutamine-binding periplasmic protein/glutamine transport system permease protein	530	57.68	1	1	2.8	1	0	12.564	-1.19258	0.709661	17.9592	17.5017	19.738	18.8892	19.9284	19.959
sll0470	Sll0470	Sll0470 protein	186	20.719	1	1	7.5	3	0	6.8531	-1.20177	1.17673	18.4363	18.22	19.2291	19.4011	19.524	20.5657
sll1994	HemB	Delta-aminolevulinic acid dehydratase	327	36.163	1	10	24.5	26	0	77.18	-1.20569	0.299509	24.0469	23.7339	19.0071	23.5359	23.639	23.2301
sll1021	Sll1021	Flotillin family inner membrane protein sll1021	673	74.423	1	35	47.5	117	0	323.31	-1.21598	0.523032	26.4307	26.4596	26.6881	28.2737	29.1796	25.773
slr1615	RfbE	Perosamine synthetase	378	41.944	1	2	4	6	0	12.473	-1.23931	1.38389	20.3666	19.7743	19.4228	21.0429	20.5768	21.662
ssl2598	PsbH	Photosystem II reaction center protein H	64	7.1164	1	1	21.9	11	0	9.5544	-1.25602	0.288384	24.5271	24.8906	19.4419	24.1527	24.1617	24.3134
slr1338	Slr1338	Slr1338 protein	200	22.438	1	1	4	3	0	6.5822	-1.25881	0.855222	18.9656	17.5177	19.514	20.5574	19.4087	19.8077
sll0629	Sll0629	alternative photosystem I reaction center subunit X	128	13.718	1	2	8.6	10	0	14.279	-1.31052	0.288122	18.8649	22.7972	19.2486	18.9256	23.0374	22.8793
slr1751	Prc	Carboxyl-terminal protease	423	46.832	1	7	18.2	15	0	64.171	-1.3224	0.410948	18.2692	22.2708	19.8532	22.442	21.8613	20.0571
slr0952	Fbp	Fructose-1,6-bisphosphatase class 1	347	38.262	1	2	6.1	3	0	12.289	-1.32894	0.884678	18.3431	17.2068	19.0637	18.6608	19.8219	20.1178
slr1826	Slr1826	hypothetical protein	130	14.322	1	1	7.7	3	0	8.0201	-1.34994	0.712284	18.7629	17.1181	19.237	19.0974	19.1873	20.8832
slr1116	Slr1116	Slr1116 protein	173	20.103	1	2	9.8	7	0	15.262	-1.35281	0.707933	22.01	21.9167	19.3647	22.365	22.3358	22.6492
slr1030	ChlI	Magnesium-chelatase subunit ChlI	357	39.463	1	4	11.2	4	0	22.499	-1.3744	1.04755	18.5826	17.3144	19.3669	19.8581	19.5113	20.0178
slr2072	IlvA	L-threonine dehydratase	508	56.545	1	7	18.3	26	0	64.367	-1.37516	0.834178	21.6524	22.0835	19.6966	22.5573	22.1332	22.8676
sll1553	PheT	Phenylalanine--tRNA ligase beta subunit	810	87.887	1	2	2.2	1	0	11.139	-1.41384	0.680857	17.5273	17.1425	19.6034	18.6485	19.3246	20.5417
smr0006	PsbF	Cytochrome b559 subunit beta	44	4.9328	1	1	38.6	12	0	35.688	-1.43351	0.39578	24.2497	24.0926	19.6094	23.9006	23.9311	24.4205
slr0513	FutA2	Iron uptake protein A2	346	38.155	1	2	8.4	4	0	12.846	-1.44507	0.986472	18.034	18.0213	19.2754	20.4469	18.7958	20.4232
ssl1690	NdhO	NAD(P)H-quinone oxidoreductase subunit O	72	8.2885	1	3	54.2	15	0	59.717	-1.45146	0.319903	24.9328	25.2971	19.5598	24.8639	24.841	24.4392
slr1847	Slr1847	Nucleoid-associated protein slr1847	114	12.135	1	4	33.3	12	0	34.385	-1.45279	0.466715	23.1308	23.2227	19.1392	23.2411	23.3665	23.2435
slr1512	Slr1512	Slr1512 protein	374	39.647	1	6	14.7	21	0	79.744	-1.4546	0.400315	24.4651	24.3167	20.0854	25.102	24.8082	23.3207
sll1818	RpoA	DNA-directed RNA polymerase subunit alpha	314	35.003	1	6	19.4	22	0	48.765	-1.5069	0.58963	22.8143	22.981	19.4876	23.1064	23.2693	23.4279
slr1839	CcmK4	Carboxysome shell protein CcmK4	112	11.903	1	4	30.4	9	0	25.968	-1.59345	0.480914	18.0727	22.551	19.4688	22.312	22.0627	20.4982
sll1479	Pgl	6-phosphogluconolactonase	240	26.482	1	2	8.8	9	0	15.468	-1.60332	0.891739	18.3193	17.9806	19.3817	21.3961	18.8888	20.2067
slr0435	AccB	Biotin carboxyl carrier protein of acetyl-CoA carboxylase	154	16.313	1	1	5.2	2	0	7.7949	-1.62572	1.15314	18.592	17.5428	19.116	20.4759	19.0938	20.5582
slr0695	Slr0695	Slr0695 protein	173	19.049	1	1	5.2	2	0	6.6579	-1.64759	1.03551	18.3544	17.0137	19.1011	19.3775	19.3691	20.6653
sll0274	Sll0274	Sll0274 protein	196	21.473	1	2	11.7	5	0	13.227	-1.66526	0.854262	18.3601	17.1934	19.595	21.0291	19.0119	20.1033
sll0370	Sll0370	carbamoyl-phosphate synthase, pyrimidine-specific, large chain	1105	121.62	1	2	1.6	5	0	12.023	-1.66715	0.787009	18.454	17.4196	20.1823	19.5357	21.4075	20.1141
slr1992	Gpx2	Hydroperoxy fatty acid reductase Gpx2	154	16.646	1	2	14.9	1	0	11.786	-1.70669	0.747177	18.2682	16.8452	19.9955	19.1484	20.9464	20.1341
slr1096	LpdA	Dihydrolipoyl dehydrogenase	474	50.832	1	3	9.7	4	0	19.035	-1.7841	0.894472	18.8774	17.2504	19.1496	21.5637	19.1263	19.9397
slr1744	AmiA	N-acetylmuramoyl-L-alanine amidase	649	70.011	1	3	4.8	8	0	20.656	-1.79224	0.763765	18.2048	17.1883	20.0617	21.4085	19.0676	20.3555
ssl3445	RpmE	50S ribosomal protein L31	81	9.3036	1	2	25.9	5	0	13.778	-1.89495	0.630639	18.5735	21.976	19.1063	22.3224	22.8968	20.1214
sll1307;chr1_264450	Sll1307	Sll1307 protein	175;190	17.849	2	2;2	17.1	4	0	12.003	-1.93252	0.910445	18.3739	17.0519	19.2805	21.4699	18.8705	20.1637
slr1122	Slr1122	Slr1122 protein	250	28.176	1	3	11.6	6	0	28.857	-2.04897	0.934259	18.5904	17.4326	19.1976	18.8981	21.9628	20.5066
ssl0601	RpsU	30S ribosomal protein S21	60	7.3414	1	6	60	17	0	66.25	-2.18078	0.569497	24.7601	24.5403	19.5762	24.913	24.9999	25.5061
sll0754	RbfA	Ribosome-binding factor A	133	14.749	1	3	27.8	10	0	27.855	-2.20672	0.989129	18.2759	21.8082	19.3686	22.0799	21.8982	22.0947
slr0321	Era	GTPase Era	315	34.791	1	2	6.3	8	0	12.578	-2.27803	1.35936	18.4212	17.2997	19.8781	20.7635	20.4268	21.2428
sll1819	RplQ	50S ribosomal protein L17	116	13.228	1	3	35.3	6	0	24.201	-2.36984	0.533964	18.0341	17.2105	19.7287	19.0385	18.7333	24.3111
slr1622	Ppa	Inorganic pyrophosphatase	169	19.088	1	3	19.5	5	0	30.013	-2.71724	1.54299	18.5799	17.6413	19.7618	22.1512	21.624	20.3594
slr0650	Slr0650	Slr0650 protein	201	22.501	1	7	30.8	25	0	61.382	-2.72168	0.542462	23.9082	17.7382	24.7363	24.6658	24.6401	25.2419
slr1984	Rps1b	30S ribosomal protein S1 homolog B	305	33.795	1	3	9.8	5	0	24.229	-3.08039	1.75374	18.02	17.5585	19.2707	21.6708	22.2205	20.199
sll0519	NdhA	NAD(P)H-quinone oxidoreductase subunit 1	372	40.548	1	2	7.5	5	0	67.55	-3.67707	0.85877	18.0679	17.5695	19.7974	24.1177	18.4116	23.9367
sfGFPFLAG	sfGFP-3xFLAG	sfGFP-3xFLAG fusion protein	241;249	27.187	2	26;11	81.3	179	0	323.31	-9.29407	1.39208	18.6342	27.002	28.7026	34.1225	33.8575	34.241

## Sheet: Table S7
Supporting Table 7 - List of identified proteins from Student's t-test: Slr0489S-3xFLAG and control Co-IP
Protein identity					Protein identification						Student's t-test		Label-free protein quantification (Log2 LFQ intensities; imputed values in italic)
Protein IDs	Protein name	Protein description	Sequence lengths	Mol. weight [kDa]	Number of proteins	Peptide counts	Sequence coverage [%]	MS2 counts	Q-value	Score	Log2 t-test Difference (Slr0489S IP/sfGFP IP)	-Log10 t-test p-value	Slr0489S IP Replicate 1	Slr0489S IP Replicate 2	Slr0489S IP Replicate 3	sfGFP IP Replicate 1	sfGFP IP Replicate 2	sfGFP IP Replicate 3
sll7086	Sll7086	CRISPR3 type III-Bv system Cmr5 protein	131	14.549	1	3	26.7	11	0	16.603	8.28182	4.0495	27.1532	26.8342	26.0527	18.1366	17.8718	19.1862
chr1_116115-3xFLAG; chr1_116115; chr1_17047; chr1_71049; chr1_253927	Slr0489S-3xFLAG fusion of nested protein	Chr1_116115-3xFLAG fusion protein [2622596 - 2622937]; chr1_116115 Hypothetical protein [2622596 - 2622937]	116;114;100;110;140	13.286	5	15;13;1;1;1	90.5	98	0	308.08	8.2559	1.35668	30.865	31.0999	30.7213	26.2044	17.0235	24.6906
slr0489L	Slr0489L	Slr0489L protein	151	17.517	1	5	23.2	13	0	31.497	6.39494	3.41569	25.2303	25.2155	24.1844	18.1491	17.8959	19.4003
smr0005	PsaM	Photosystem I reaction center subunit XII	31	3.38	1	2	100	8	0	13.274	5.94496	0.952607	27.3126	27.1233	26.9455	26.9909	17.7734	18.7822
slr2018	Slr2018	Slr2018 pilin operon protein	799	84.853	1	16	27.4	38	0	274.92	4.66279	2.96632	27.451	27.5549	26.3371	23.235	22.0693	22.0503
sll1324	AtpF	ATP synthase subunit b	179	19.804	1	27	60.9	105	0	253.07	4.50057	3.40622	30.5427	30.6845	29.3986	25.6061	25.7462	25.7717
slr1330	AtpC	ATP synthase epsilon chain	136	14.58	1	2	30.9	9	0	41.999	4.1268	1.3241	23.7581	19.594	23.3867	18.2147	17.038	19.1056
slr0442	Slr0442	minor pilin PilX2	611	62.907	1	5	7.7	10	0	14.445	4.10599	2.99944	21.8896	21.6269	22.5902	17.6025	17.4977	18.6885
slr0043	CmpC	Bicarbonate transport ATP-binding protein CmpC	667	74.096	1	9	13.5	11	0	43.201	4.08438	2.17727	21.6031	22.0054	23.4746	18.6905	17.1906	18.9489
slr0869	Slr0869	Slr0869 protein	812	92.531	1	8	11	14	0	26.525	3.99967	2.723	22.4119	22.4927	22.3039	18.1915	17.5799	19.438
slr0343	PetD	Cytochrome b6-f complex subunit 4	160	17.444	1	2	24.4	7	0	6.0831	3.87891	0.963987	23.1931	23.5635	24.5049	23.49	17.4395	18.6953
slr6071;slr6012	Slr6012	Slr6012 protein	730;730	84.206	2	8;8	11.5	13	0	12.155	3.54266	2.29193	21.6211	21.579	21.5159	18.3832	16.7946	18.9102
slr0731	Slr0731	Slr0731 protein	402	44.716	1	2	5.7	5	0	8.867	3.38296	2.27363	21.4116	21.7784	20.715	17.4357	17.3428	18.9775
sll0017	HemL	Glutamate-1-semialdehyde 2,1-aminomutase	433	45.891	1	5	15.5	8	0	13.483	3.37969	1.44906	19.6241	22.5002	22.8438	18.3778	17.6024	18.8488
slr1780	Slr1780	hypothetical protein YCF54	106	12.184	1	2	15.1	6	0	7.7931	3.27193	1.61462	19.4242	21.6735	22.2724	18.0015	17.2203	18.3325
chr1_16981	Slr1079S	Slr1079S hypothetical protein [383370 - 383753]	128	14.686	1	3	39.1	12	0	90.117	3.22942	0.415107	28.2776	27.1054	27.2899	29.1626	18.0451	25.7769
sll0230	Sll0230	hypothetical protein	101	10.944	1	3	26.7	7	0	9.0034	2.94552	0.936447	21.8874	21.909	22.9451	21.9723	17.0861	18.8466
sll1819	RplQ	50S ribosomal protein L17	116	13.228	1	3	35.3	7	0	10.573	2.79044	0.617175	23.3101	22.9112	22.6271	18.1675	18.1078	24.2017
ssl0467	Ssl0467	Ssl0467 protein	71	8.254	1	2	12.7	4	0	2.1105	2.74661	0.813931	19.1996	19.53	23.9697	17.9489	17.8173	18.6932
slr0924;chr1_123830	Slr0924	periplasmic protein, function unknown;chr1_123830 Hypothetical p	242;306	26.113	2	4;4	25.2	11	0	18.126	2.73775	0.739508	22.1066	22.3944	22.7197	22.8917	17.1824	18.9333
slr0172	GuaB	IMP dehydrogenase	155	17.27	1	1	8.4	3	0	21.433	2.65904	0.960283	19.4296	19.7948	22.9691	17.2964	17.5644	19.3555
sll0179	GltX	Glutamate--tRNA ligase	483	54.008	1	5	11.4	5	0	16.735	2.63963	1.02579	19.4758	19.3997	22.382	17.4953	16.7269	19.1164
sll1981	IlvB	Acetolactate synthase	550	60.173	1	2	4.2	9	0	9.0936	2.63918	1.07195	20.3779	21.0975	21.2932	17.2296	17.0926	20.5289
sll1721	PdhB	Pyruvate dehydrogenase E1 component subunit beta	324	35.709	1	2	7.7	2	0	5.5935	2.56336	0.80526	19.8649	19.3307	23.747	18.4596	17.5664	19.2265
sll1743	RplK	50S ribosomal protein L11	141	14.977	1	4	29.8	7	0	8.0765	2.53588	0.507158	22.8421	19.5018	23.8284	22.9947	17.3591	18.2109
slr0542	ClpP1	ATP-dependent Clp protease proteolytic subunit 1	198	21.741	1	2	24.2	2	0	6.4559	2.41116	0.799504	19.1098	19.6229	23.1945	17.9307	17.4822	19.2808
sll1027	GltD	NADH-glutamate synthase small subunit	494	54.144	1	3	6.9	3	0	6.4492	2.37004	1.74867	20.7592	19.7287	20.8242	17.8646	17.3257	19.0117
slr1848	HisD	Histidinol dehydrogenase	434	46.533	1	2	5.5	2	0	4.2904	2.36374	0.712397	19.3183	19.4444	23.8174	18.591	17.881	19.0169
sll1638	Sll1638	Sll1638 protein	149	16.477	1	3	26.2	2	0	13.727	2.35885	0.878569	19.3178	19.4406	23.0163	17.9921	17.8705	18.8355
sll1908	Sll1908	D-3-phosphoglycerate dehydrogenase	526	56.211	1	4	8.7	8	0	25.779	2.31488	0.784847	22.1856	22.3173	22.2888	18.076	22.5939	19.1771
slr0476	Slr0476	Slr0476 protein	136	14.394	1	2	23.5	5	0	13.792	2.30938	1.06928	19.2329	19.5067	22.2336	17.7687	17.5965	18.6799
sll1526	Sll1526	Uncharacterized protein sll1526	506	57.726	1	3	5.7	7	0	4.8203	2.29911	1.9154	19.4837	19.5181	20.7378	17.2245	17.3466	18.2711
slr1890	BfrB	Bacterioferritin	176	20.226	1	2	12.5	6	0	3.1046	2.26362	1.23118	19.5048	19.9142	21.922	18.3858	17.3522	18.8122
sll0680	PstS	Phosphate-binding protein	383	40.023	1	2	4.7	2	0	6.9851	2.21534	1.54989	19.488	19.9774	21.4689	18.445	17.5411	18.3022
slr1944	Slr1944	Slr1944 protein	538	58.685	1	2	3.9	3	0	7.2172	2.21342	1.51651	19.7628	19.9166	21.3548	18.1331	17.36	18.9007
slr1734	OpcA	Putative OxPP cycle protein OpcA	475	52.033	1	5	13.3	9	0	30.273	2.16859	1.02235	21.8609	21.8836	21.857	18.344	21.6402	19.1115
sll0402	AspC	Aspartate aminotransferase	389	42.352	1	2	4.6	2	0	8.0753	2.16113	1.39118	19.8535	19.5528	21.1284	18.1151	17.0365	18.8997
slr0044	CmpD	Bicarbonate transport ATP-binding protein CmpD	282	31.34	1	4	14.9	4	0	33.607	2.14926	0.838738	19.2468	19.4954	22.7071	18.1413	17.731	19.1292
slr0073	Slr0073	Sensory transduction histidine kinase	315	35	1	2	6	5	0	2.7125	2.14641	1.14181	19.306	19.3855	21.4624	17.5028	17.2526	18.9594
slr0708	Slr0708	Slr0708 protein	402	44.68	1	3	13.4	5	0	7.3558	2.13643	1.22838	19.1523	19.8495	21.2963	17.862	17.1197	18.9071
sll1098	FusB	Elongation factor G 2	691	75.43	1	3	4.3	3	0	7.8249	2.12783	1.54175	19.1559	19.8237	20.8699	18.1216	17.039	18.3053
sll5034	Sll5034	Sll5034 protein	207	23.2	1	3	16.9	5	0	10.185	2.12101	1.01079	19.0775	19.355	21.7281	18.5308	16.9136	18.3532
slr1604	FtsH3	ATP-dependent zinc metalloprotease FtsH 3	616	67.25	1	3	6.5	4	0	7.8778	2.11881	1.24239	19.3086	19.7246	21.4673	17.8509	17.383	18.9102
slr1410	Slr1410	Uncharacterized WD repeat-containing protein slr1410	334	35.989	1	2	6.3	3	0	5.0293	2.06299	1.29553	19.0163	19.5934	21.2854	17.6519	17.544	18.5103
sll0601	Nit1	Deaminated glutathione amidase	272	30.191	1	2	9.2	7	0	6.4372	2.06227	1.08068	18.9321	20.1155	21.4194	17.8337	17.32	19.1264
slr0729	Slr0729	Thylakoid-associated protein slr0729	101	10.946	1	4	54.5	8	0	28.862	2.05305	0.33456	19.1721	23.2019	23.9999	24.0722	17.3478	18.7948
sll0362	AlaS	Alanine--tRNA ligase	877	96.14	1	3	3.9	4	0	3.017	2.04002	1.29615	19.3426	19.5721	21.2803	17.8448	17.417	18.8132
ssl1972	Ssl1972	UPF0367 protein ssl1972	93	9.9234	1	2	20.4	4	0	3.8926	2.0323	0.753606	19.397	19.3177	22.1678	18.2659	16.8554	19.6644
sll1553	PheT	Phenylalanine--tRNA ligase beta subunit	810	87.887	1	3	3.3	2	0	3.5472	2.02167	2.07071	19.4386	20.006	20.4241	17.9096	17.4162	18.4778
sll0006	AspC	Aspartate aminotransferase	394	43.979	1	4	11.9	4	0	13.007	2.01546	0.96897	19.1665	19.31	21.6437	18.1666	17.0055	18.9018
slr0557	ValS	Valine--tRNA ligase	910	102.74	1	5	6.2	6	0	8.2985	2.00776	1.09487	19.3941	19.3829	21.491	17.686	17.4797	19.0791
slr1619	Slr1619	Rhamnosyl O-methyltransferase	249	27.752	1	2	7.6	3	0	6.687	1.98012	1.02521	19.3825	19.4012	21.8637	18.304	17.5485	18.8546
sll1536	MoeB	Molybdopterin biosynthesis MoeB protein	392	42.759	1	3	12	3	0	10.434	1.96831	0.893066	19.4173	19.3625	21.9493	18.3844	17.2329	19.2068
sll1298	Sll1298	Putative carboxymethylenebutenolidase	246	26.941	1	3	18.7	5	0	12.763	1.96466	1.57559	19.5767	19.3764	20.9441	17.9708	17.5097	18.5227
sll0534	ClpP2	ATP-dependent Clp protease proteolytic subunit 2	226	24.823	1	2	16.4	3	0	3.7502	1.9534	1.10312	19.0851	19.5631	21.301	17.7689	17.3419	18.9781
sll0172	Sll0172	Sll0172 protein	152	16.347	1	2	17.1	4	0	4.9056	1.94217	1.24848	19.2933	19.6521	21.2831	18.3604	17.3598	18.6819
slr0884	Slr0884	glyceraldehyde 3-phosphate dehydrogenase 1 (NAD+)	354	37.919	1	2	5.1	2	0	4.1535	1.918	1.33529	19.385	19.3486	20.5958	17.7533	16.993	18.829
slr0552	Slr0552	Slr0552 protein	244	26.721	1	3	13.9	5	0	14.293	1.90195	1.28896	19.3094	19.3941	21.2161	18.4716	17.4772	18.2648
ssl1633	Ssl1633	high light-inducible polypeptide HliC, CAB/ELIP/HLIP superfamily	47	5.1499	1	1	27.7	1	0	15.502	1.89861	0.918584	19.3227	19.6052	21.5587	18.4647	17.0304	19.2956
sll1218	Ycf39	Ycf39 protein	219	23.534	1	2	9.1	2	0	4.8862	1.89564	1.47354	19.8943	19.6214	21.0029	18.1241	17.6363	19.0712
slr2032	Ycf23	Ycf23 protein	248	25.366	1	3	16.5	7	0	27.028	1.88954	0.998486	21.3475	22.0878	22.8391	20.8145	21.131	18.6603
slr0151	Slr0151	Slr0151 protein	320	34.915	1	2	8.1	3	0	10.564	1.8817	1.16317	19.1254	19.4036	21.3432	17.8877	17.6698	18.6696
ssl2595	Ssl2595	Ssl2595 protein	89	10.356	1	2	31.5	4	0	10.097	1.88114	1.3158	19.359	19.7538	21.2997	17.9058	17.9838	18.8795
sll0542	AcsA	Acetyl-coenzyme A synthetase	653	73.051	1	4	7.4	8	0	13.542	1.87628	1.09339	19.6128	19.3754	21.5734	17.982	17.83	19.1208
sll1261	Tsf	Elongation factor Ts	218	24.231	1	8	43.1	18	0	43.068	1.85459	0.506433	23.763	23.8331	23.9682	23.9107	23.2713	18.8185
slr1924	Slr1924	D-alanyl-D-alanine carboxypeptidase	400	44.315	1	3	8.2	3	0	15.09	1.85201	1.03917	19.3446	19.4716	21.1823	18.122	17.1364	19.1841
sll0058	DnaK1	Chaperone protein dnaK1	692	75.178	1	2	2.9	0	0.0080257	1.4372	1.84666	1.31557	19.5583	19.8998	20.5199	17.8639	17.2875	19.2865
sll0039	Sll0039	CheY subfamily	119	13.181	1	4	41.2	5	0	9.9631	1.84328	1.26536	19.4364	19.3692	21.2292	18.1004	17.6683	18.7362
sll1435	Sll1435	glutamyl-tRNA(Gln) amidotransferase subunit B	519	57.605	1	4	8.9	5	0	18.21	1.83809	1.01536	19.26	19.5272	21.4859	18.2356	17.432	19.0913
slr1720	AspS	Aspartate--tRNA(Asp/Asn) ligase	599	67.209	1	3	6.2	6	0	7.9445	1.83577	1.12504	18.9947	19.7065	21.3851	18.0794	17.7492	18.7504
sll1733	NdhD3	NADH dehydrogenase subunit 4	502	54.346	1	1	2.6	1	0	10.667	1.81576	1.06711	19.6012	19.3754	21.3608	17.9919	17.6322	19.2661
sll1305	Sll1305	Sll1305 protein	295	32.885	1	1	3.7	1	0	2.8966	1.8054	1.36588	19.563	19.4896	20.9594	18.0365	17.618	18.9415
slr1517	LeuB	3-isopropylmalate dehydrogenase	362	38.667	1	2	6.1	3	0	4.0927	1.80381	1.60174	19.5708	19.4939	20.6274	17.9422	17.5521	18.7865
slr1256;chr1_62230	UreA	Urease subunit gamma	100;125	11.056	2	1;1	9	1	0.0033223	1.8016	1.80132	1.19282	19.3391	19.3171	21.0913	17.641	17.7971	18.9055
slr0670	Slr0670	Slr0670 protein	291	32.676	1	2	8.6	3	0	16.977	1.79451	0.826357	19.2673	19.6641	22.2554	18.7142	17.9155	19.1737
slr1406	Slr1406	Slr1406 protein	181	18.752	1	1	13.3	1	0	5.4972	1.7942	1.12975	19.1844	19.686	21.4659	18.1227	17.96	18.871
sll1239	Sll1239	Sll1239 protein	178	20.608	1	1	6.2	2	0	5.7714	1.7751	1.50646	19.6311	19.4397	20.8059	17.9391	17.7595	18.8528
slr1763	Slr1763	Slr1763 protein	400	45.355	1	2	6	2	0	5.3366	1.77089	1.05347	19.4088	19.8046	20.661	17.937	17.1228	19.5018
slr1239	PntA	proton-translocating NAD(P)(+) transhydrogenase	530	56.049	1	1	2.1	3	0	2.2324	1.7697	1.80206	19.7978	19.6399	19.6937	17.83	17.2454	18.747
sll1316	PetC2	Cytochrome b6-f complex iron-sulfur subunit 2	180	18.996	1	7	33.3	23	0	46.4	1.76723	0.379374	23.7537	23.6271	24.2831	24.088	24.0458	18.2284
sll0807	Rpe	Ribulose-phosphate 3-epimerase	230	24.971	1	5	30	10	0	26.366	1.71453	0.530302	23.0983	22.649	23.6012	22.9568	22.6344	18.6137
sll0041	PixJ1	Photoreceptor for positive phototaxis PixJ1	1000	108.33	1	5	5.8	7	0	20.92	1.70452	0.488801	22.1104	19.1828	21.6946	21.5753	17.4443	18.8547
slr1161	Slr1161	Slr1161 protein	199	22.952	1	2	5.5	3	0	4.3787	1.70156	1.17504	19.237	19.2414	20.7819	18.5549	17.1619	18.4388
slr1909;chr1_27317	Slr1909	NarL subfamily	213;233	24.046	2	2;2	10.3	7	0	3.6284	1.68785	1.4586	19.326	19.1964	20.0699	17.6245	17.1725	18.7318
sll0923	EpsB	Exopolysaccharide export protein	756	83.64	1	2	2.4	3	0	4.6519	1.68753	2.09071	19.3697	19.6458	20.152	17.8346	17.7227	18.5475
sll1393	GlgA2	Probable glycogen synthase 2	491	56.224	1	3	5.9	10	0	9.4558	1.67972	1.12346	19.0898	20.446	20.0983	18.1098	17.252	19.2331
sll1654	Sll1654	hypothetical protein	136	14.554	1	1	12.5	1	0	13.414	1.67858	1.35447	19.2228	19.571	20.0017	17.6264	17.178	18.9553
sll1958	Sll1958	histidinol phosphate aminotransferase	367	40.686	1	3	9	5	0	8.7196	1.66445	1.20282	19.1715	19.1827	20.9741	17.7895	17.9342	18.6112
slr0001	Slr0001	Slr0001 protein	160	17.451	1	2	21.2	4	0	6.6955	1.66106	1.27018	19.5915	19.5046	21.2008	18.4121	17.9857	18.916
ssr2998	Ssr2998	Ssr2998 protein	65	7.2203	1	5	44.6	12	0	18.268	1.65309	0.445817	23.2627	23.5328	24.0336	23.8899	23.1498	18.8301
slr1233	FrdA	succinate dehydrogenase	575	63.701	1	3	5	3	0	9.3849	1.64168	1.1546	20.1375	19.2306	20.6989	18.2493	17.5635	19.3292
slr1945	GpmI	2,3-bisphosphoglycerate-independent phosphoglycerate mutase	532	57.981	1	1	2.1	1	0	2.5898	1.63052	1.33542	19.8471	19.6361	19.1973	18.0444	16.9453	18.7992
sll0830;chr1_190785	Sll0830	Elongation factor G-like protein	669;676	73.369	2	4;4	6.1	4	0	6.4505	1.62313	1.17618	19.7394	19.3596	20.978	18.517	17.6126	19.0781
sll1069	FabF	3-oxoacyl-[acyl-carrier-protein] synthase 2	416	44.004	1	3	8.4	2	0	3.9683	1.61909	0.976144	19.7754	19.3501	21.1962	18.3043	17.6569	19.5033
sll1771	Sll1771	Sll1771 protein	254	28.472	1	2	9.4	2	0	5.4275	1.59809	1.34085	19.3563	19.5765	20.3668	17.8397	17.5785	19.087
sll1212	RfbD	GDP-mannose 4,6-dehydratase	362	41.333	1	7	20.4	19	0	26.219	1.59672	0.509691	22.4697	22.9762	23.3291	23.0755	22.2357	18.6735
slr1139	Slr1139	Thioredoxin-like protein slr1139	109	12.171	1	1	7.3	0	0.006483	1.5478	1.57707	1.80258	19.2726	19.4297	19.8341	17.8362	17.3774	18.5916
sll0173	Sll0173	Virginiamycin B lyase	352	38.545	1	2	7.4	1	0	3.6338	1.57236	1.36917	19.4267	19.2711	20.3667	18.2563	17.3407	18.7504
slr1853	Slr1853	Slr1853 protein	113	12.111	1	2	18.6	4	0	13.069	1.56592	1.02966	18.9755	19.7516	21.1467	18.2312	17.9248	19.0202
slr1900	Slr1900	Slr1900 protein	247	27.406	1	2	8.1	5	0	4.9268	1.56241	1.12362	19.2536	19.8116	20.4886	17.913	17.5855	19.3681
sll0887	Sll0887	Sll0887 protein	446	47.599	1	2	5.6	1	0.008	1.4027	1.56012	1.0554	19.3127	19.5188	20.3173	18.0685	17.1229	19.277
sll1823	Sll1823	adenylosuccinate synthetase	443	48.679	1	2	3.8	1	0	3.2799	1.55966	1.34505	19.331	19.0995	20.6749	17.871	17.9562	18.5992
sll1425;chr1_246784	ProS	Proline--tRNA ligase	603;618	66.929	2	2;2	3.3	2	0	4.1271	1.55759	1.5163	19.5559	19.2758	20.5107	17.9395	17.9219	18.8082
sll1852	Ndk	Nucleoside diphosphate kinase	149	16.692	1	6	48.3	22	0	19.819	1.5498	0.435463	22.758	22.1008	23.3299	22.9481	22.3572	18.2339
slr7083	Slr7083	Chromosome partition protein Smc	377	42.55	1	2	7.2	4	0	5.8326	1.54822	0.499352	19.1459	21.9072	17.753	17.8513	17.1548	19.1553
slr0940	CrtQ	Zeta-carotene desaturase	489	54.369	1	2	4.7	2	0.0065253	1.6149	1.54699	1.4997	19.7567	19.1441	19.7311	17.6157	17.5136	18.8617
sll0853	CpcS1	Chromophore lyase CpcS/CpeS 1	186	21.213	1	2	8.6	2	0	2.6815	1.52285	0.951641	19.453	19.7534	20.9111	18.0626	17.7759	19.7104
sll0051	Sll0051	Sll0051 protein	159	17.799	1	5	49.1	12	0	34.479	1.50753	0.456554	22.3996	22.7026	23.6349	23.0654	22.4724	18.6766
ssl1911	Ssl1911	Ssl1911 protein	65	7.4753	1	2	40	2	0	8.4695	1.50743	0.854937	18.857	19.4191	21.1314	18.0718	17.6495	19.164
slr0875	MscL	Large-conductance mechanosensitive channel	145	15.805	1	1	9	1	0	15.502	1.50345	0.625975	18.9156	18.4762	21.5753	17.9831	17.4175	19.0562
sml0007	PsbY	Photosystem II protein Y	39	4.2019	1	2	25.6	8	0	6.7329	1.49927	0.332414	23.8401	23.9647	24.2114	24.4387	24.2838	18.7959
slr2136	IspG	4-hydroxy-3-methylbut-2-en-1-yl diphosphate synthase (ferredoxin)	403	44.175	1	2	4.5	2	0	4.383	1.49495	0.933357	19.0798	19.4333	21.1009	18.3114	17.6921	19.1256
sll0934	CcmA	Carboxysome formation protein	351	37.633	1	4	15.4	9	0	12.164	1.49318	0.740476	21.8277	21.7755	22.9178	21.539	21.5154	18.9871
sll1214	AcsF1	Magnesium-protoporphyrin IX monomethyl ester [oxidative] cyclase 1	358	42.153	1	2	8.1	3	0	9.5638	1.48877	0.573085	19.4864	21.3011	21.0668	20.8985	17.4157	19.0738
slr1970	Slr1970	Slr1970 protein	173	19.451	1	1	4.6	1	0	2.5869	1.4784	1.51675	19.5742	19.9398	19.6626	18.1141	17.566	19.0612
slr7073	Slr7073	Slr7073 protein	114	12.421	1	1	9.6	1	0	5.9618	1.46882	1.26557	19.0402	19.5766	19.5759	17.9248	17.0398	18.8218
sll0997	Sll0997	hypothetical protein	363	40.674	1	1	3.3	1	0	2.6384	1.45597	1.30894	19.8191	19.2373	19.2056	18.0447	17.0938	18.7556
sll0057	GrpE	Protein GrpE	249	27.567	1	7	37.3	12	0	40.125	1.45268	0.412682	22.7752	22.9416	23.4742	23.049	23.1356	18.6483
slr1349	Pgi	Glucose-6-phosphate isomerase	531	58.356	1	4	8.5	12	0	19.455	1.44962	0.442609	19.3708	21.4588	22.1339	21.5365	17.6097	19.4684
sll0080	ArgC	N-acetyl-gamma-glutamyl-phosphate reductase	351	38.209	1	2	6	6	0	5.6865	1.43556	0.816174	20.0266	19.7946	21.802	18.2051	19.9745	19.137
slr1841	Slr1841	Slr1841 protein	630	67.6	1	2	3.7	5	0	15.615	1.43356	0.849466	19.1237	19.1318	21.0771	17.9322	17.8794	19.2204
slr0193	Slr0193	RNA-binding protein	151	16.616	1	2	17.9	8	0	5.2389	1.41915	0.378408	18.8301	21.956	21.6978	21.7937	17.8139	18.6188
slr0280	Slr0280	Slr0280 protein	610	65.405	1	2	3.9	2	0	3.4759	1.41566	1.36048	19.345	20.113	18.8735	17.8952	17.5429	18.6465
sll1390	Sll1390	Sll1390 protein	249	27.394	1	2	7.2	4	0	5.1248	1.40743	1.59293	19.3143	19.5044	20.2825	18.3573	17.7847	18.7368
sll0180	Sll0180	Sll0180 protein	501	53.966	1	7	20.8	11	0	24.059	1.40408	0.430239	21.649	19.1254	21.7527	21.5099	17.7611	19.0438
sll1308	Sll1308	Sll1308 protein	248	25.861	1	2	9.7	1	0	2.6451	1.39136	1.94248	19.4457	19.298	20.0538	18.2493	17.8209	18.5533
sll0108	Sll0108	Putative ammonium transporter sll0108	507	53.58	1	1	1.6	1	0.0064516	1.5054	1.37739	1.37325	19.4977	19.8379	19.6926	18.15	17.5906	19.1555
slr0965	DnaN	Beta sliding clamp	391	42.087	1	3	8.4	2	0	4.3697	1.37102	1.43347	19.4192	19.1848	20.4632	18.2398	18.0025	18.7119
slr1843	Zwf	Glucose-6-phosphate 1-dehydrogenase	509	57.885	1	11	21.4	21	0	40.724	1.36423	0.415238	22.688	22.699	22.7702	22.6535	22.8493	18.5617
sll0430	HtpG	Heat shock protein	658	75.029	1	2	3.6	4	0	3.5398	1.35839	1.25382	19.1107	19.4677	20.3881	18.3313	17.6964	18.8637
sll0504	LysA	Diaminopimelate decarboxylase	469	50.847	1	2	6.8	3	0	12.155	1.34336	1.17504	19.1187	19.5087	20.4523	17.9927	17.9799	19.077
sll1530	Sll1530	Sll1530 protein	386	43.745	1	3	8.8	3	0	8.7207	1.33647	1.57136	19.1912	19.7115	19.4271	18.1468	17.4626	18.711
sll0401	Sll0401	citrate synthase	394	44.422	1	2	4.1	2	0	3.7275	1.31665	0.466475	19.5798	21.3355	17.6069	17.784	17.4616	19.3267
sll0550	Dfa1	Diflavin flavoprotein A 1	573	63.505	1	2	2.6	5	0	4.4324	1.3153	0.584841	20.6008	19.7023	21.7219	18.2091	20.9369	18.933
slr0149	Slr0149	Slr0149 protein	156	18.386	1	1	5.8	1	0.0032841	1.7101	1.31468	1.6534	19.436	19.9113	19.3659	17.8879	17.9887	18.8925
slr1301	Slr1301	Slr1301 protein	535	61.692	1	1	2.8	2	0	3.0143	1.30803	1.45215	18.7912	19.0373	19.1559	17.3685	17.2021	18.4898
slr1855	Slr1855	Slr1855 protein	607	70.003	1	7	11.5	16	0	26.703	1.29282	0.402386	22.1535	22.4403	22.9561	22.4027	22.7197	18.549
slr0038	Slr0038	Slr0038 protein	132	15.24	1	1	9.1	1	0	4.7168	1.2875	1.38615	19.2933	19.1705	19.6971	18.0093	17.4508	18.8383
slr0426	FolE	GTP cyclohydrolase 1	234	26.639	1	4	18.8	5	0	12.132	1.26897	0.51944	19.6864	19.8294	21.7536	17.8077	20.6995	18.9552
sll1091	ChlP	Geranylgeranyl diphosphate reductase	407	44.882	1	7	16	13	0	22.157	1.25988	0.697538	21.8196	22.2637	22.2893	21.6392	21.707	19.2469
slr1887	HemC	Porphobilinogen deaminase	320	34.894	1	8	23.8	9	0	21.733	1.25914	0.263146	19.2824	20.0145	23.2168	22.4513	17.5371	18.7478
sll1089	Sll1089	Sll1089 protein	213	23.491	1	2	9.9	2	0	4.461	1.25205	1.51599	19.0899	19.1799	19.8981	18.1978	17.6191	18.5948
slr0033	GatC	Glutamyl-tRNA(Gln) amidotransferase subunit C	104	11.616	1	1	8.7	1	0.0033167	1.8004	1.25075	1.2133	19.4016	19.2389	19.3743	17.4795	17.7441	19.0389
slr0228	FtsH2	ATP-dependent zinc metalloprotease FtsH 2	627	68.495	1	5	10.7	18	0	20.652	1.24845	0.418184	22.4452	22.2614	22.9041	22.5621	22.529	18.7742
sll0408	Sll0408	peptidyl-prolyl cis-trans isomerase	402	43.909	1	7	19.7	15	0	16.94	1.24713	0.44858	22.0278	22.1904	22.7448	22.3633	22.1332	18.7251
sll0945	GlgA1	Glycogen synthase 1	477	54.346	1	3	7.3	6	0	7.5419	1.20825	0.673869	20.0696	20.9656	20.7388	18.5294	20.9164	18.7034
slr0417	GyrA	DNA gyrase subunit A	860	95.072	1	1	1.2	1	0	1.9329	1.20269	0.513503	19.6811	20.8764	17.8016	18.2629	17.3717	19.1165
sll1679	HhoA	Putative serine protease HhoA	394	41.336	1	1	2.3	1	0	3.2501	1.20174	1.40378	19.594	19.7064	18.8812	18.2456	17.641	18.6899
slr0898	NirA	Ferredoxin--nitrite reductase	502	55.926	1	6	12.9	18	0	21.193	1.19883	0.376798	22.1854	22.0981	22.9862	22.513	22.5452	18.615
slr0404	Slr0404	Slr0404 protein	333	34.864	1	1	3.9	2	0	4.4819	1.19111	1.22942	18.9403	19.6445	19.089	17.8091	17.478	18.8133
slr1898	ArgB	Acetylglutamate kinase	297	31.525	1	1	4	1	0	4.6921	1.19052	0.863953	19.1322	19.2594	19.6725	17.9172	17.2356	19.3397
sll0872	Sll0872	Sll0872 protein	130	13.929	1	3	28.5	15	0	28.639	1.18727	0.306222	22.561	23.1604	23.041	23.766	22.7875	18.6471
ssr1789	HliA	High light inducible protein	57	6.4724	1	1	15.8	2	0	2.5556	1.17392	1.08445	19.7354	19.7938	18.7571	17.7471	18.0143	19.0031
sll1356	GlgP	Glycogen phosphorylase	849	96.648	1	8	9	10	0	18.095	1.16662	0.535306	22.0435	21.8092	22.4268	21.9373	21.8022	19.0402
slr1234	Slr1234	Uncharacterized HIT-like protein slr1234	114	12.456	1	2	18.4	7	0	5.4256	1.16586	0.490625	19.7	20.3519	21.1268	20.7336	17.4721	19.4754
slr0040	CmpA	Bicarbonate-binding protein CmpA	452	49.46	1	16	44.5	71	0	198.48	1.16159	1.27782	26.7656	27.1979	27.7598	26.3136	26.4682	25.4567
sll1172	ThrC	Threonine synthase	382	40.414	1	3	11.3	3	0	5.629	1.15094	0.54873	19.3392	19.4227	20.5843	19.9004	17.0527	18.9402
slr0399	Ycf39	Ycf39 gene product	326	36.519	1	1	2.8	2	0.0033333	1.8411	1.13094	1.05432	19.005	19.0133	19.3276	17.7653	17.2618	18.9259
slr1994	PhaB	Acetoacetyl-CoA reductase	240	25.333	1	2	10	4	0	5.7714	1.12739	0.396682	19.5154	19.648	21.1145	20.7974	17.0369	19.0615
ssl2717	Ssl2717	Ssl2717 protein	70	7.9208	1	1	20	1	0	3.6382	1.12634	0.985836	19.5638	19.5008	18.6406	18.5471	17.2184	18.5608
slr2004	Slr2004	Slr2004 protein	474	53.481	1	1	2.7	2	0	4.523	1.11366	1.05991	19.0988	19.1038	19.2124	17.3842	17.6971	18.9927
sll1074	LeuS	Leucine--tRNA ligase	869	98.294	1	2	2.5	3	0	3.0511	1.1056	1.18069	18.8935	19.5036	18.7888	17.7546	17.4233	18.6912
sll0726	Pgm	Phosphoglucomutase	567	61.124	1	6	12.5	14	0	27.237	1.10235	0.454106	21.355	21.7206	22.4786	21.9445	21.5237	18.779
sll1815;chr1_279789	Adk1	Adenylate kinase 1	187;194	20.453	2	6;6	46	15	0	21.492	1.09348	0.365319	21.9158	22.2496	22.654	22.635	22.1739	18.73
slr0605	Slr0605	Slr0605 protein	319	36.538	1	1	3.8	1	0	5.0773	1.09061	0.990217	19.1641	19.4471	19.6979	18.0239	17.6998	19.3136
slr0146;chr1_97004	Slr0146	Slr0146 protein	170;188	19.69	2	1;1	7.6	1	0	4.7094	1.08888	1.29701	19.3407	19.7722	19.3857	18.8043	17.6735	18.7542
sll0185	Sll0185	Sll0185 protein	419	46.993	1	2	4.5	7	0	5.9328	1.07809	0.434665	19.2781	20.9528	20.8849	18.173	21.0971	18.6114
sll1502	GltB	Ferredoxin-dependent glutamate synthase 1	1550	169.07	1	11	8.8	10	0	32.028	1.05492	0.346644	21.3099	19.5164	23.348	20.9297	20.9547	19.1251
sll0301	Sll0301	Sll0301 protein	169	18.611	1	1	7.7	1	0	4.4853	1.04696	0.964341	19.0419	19.8207	19.033	18.0007	17.6533	19.1008
sll1750;chr1_292135	UreC	Urease subunit alpha	569;587	61.037	2	2;2	4.4	4	0	3.3449	1.04584	0.461303	21.0017	19.543	20.4836	18.0961	21.0147	18.7799
sll2001	Sll2001	leucine aminopeptidase	508	53.885	1	5	11.8	18	0	30.437	1.03972	0.534447	21.705	21.9749	22.3438	21.8532	21.7572	19.2942
slr0006;chr1_109609	Slr0006	Slr0006 protein	217;249	23.373	2	5;5	40.6	24	0	22.248	1.03718	2.45894	23.585	24.0444	23.9895	22.8682	22.9633	22.6759
slr0597	Slr0597	phosphoribosyl aminoimidazole carboxy formyl formyltransferase/i	553	59.326	1	8	16.8	15	0	29.976	1.0364	0.347923	21.7724	22.3647	22.864	22.5546	22.4284	18.9089
sll1463	FtsH4	ATP-dependent zinc metalloprotease FtsH 4	628	68.198	1	5	8.8	8	0	8.4654	1.03164	0.386073	21.503	21.7592	22.3953	21.8365	22.0551	18.671
sll1185	HemF	Oxygen-dependent coproporphyrinogen-III oxidase	340	38.937	1	4	10.6	10	0	11.928	1.03065	0.250558	19.4253	19.3838	22.3181	21.9556	17.8566	18.2231
slr0398	Slr0398	unknown protein	157	17.633	1	1	6.4	1	0.0064309	1.4992	1.02919	0.93187	18.8355	19.6738	18.8598	18.0909	17.339	18.8516
slr1220	Slr1220	Slr1220 protein	317	36.009	1	3	9.5	12	0	10.208	1.02306	0.667226	20.7768	21.2353	21.7151	20.9389	20.7771	18.942
slr1838	CcmK3	Carboxysome shell protein CcmK3	103	11.003	1	1	10.7	2	0	3.9934	1.01987	1.22731	19.0542	19.5456	19.2309	18.3154	17.6012	18.8544
sll1533	PilT	Twitching mobility protein	428	47.898	1	2	3.7	3	0	3.2353	1.00959	0.75384	19.3352	19.4788	19.7282	17.3274	19.3332	18.8528
slr1839	CcmK4	Carboxysome shell protein CcmK4	112	11.903	1	2	13.4	7	0	5.0612	1.00711	0.249054	19.7376	18.8522	22.3229	21.507	17.3094	19.075
slr0677	Slr0677	Putative biopolymer transport protein ExbB-like 2	227	25.074	1	2	10.6	3	0	5.3504	1.00494	1.08075	19.3126	19.2738	19.8421	18.4428	17.7986	19.1724
ssl5113	Ssl5113	Uncharacterized protein	96	10.544	1	2	16.7	2	0	2.7881	1.00347	0.962492	19.3558	19.5438	19.0435	17.9177	17.7759	19.2391
sll2005	GyrB	DNA gyrase subunit B	1078	122.82	1	1	1	2	0	2.7728	0.991782	0.939544	19.5066	19.348	18.9042	18.1437	17.5303	19.1093
sll1362	IleS	Isoleucine--tRNA ligase	988	112.34	1	1	1.2	1	0	4.5071	0.987119	0.595778	19.6026	19.377	17.983	17.9589	17.085	18.9573
slr1573	Slr1573	hypothetical protein	262	29.113	1	1	3.4	1	0.0033113	1.7665	0.984376	1.43146	19.4417	19.2636	18.9157	17.9616	17.9239	18.7824
slr0823	Ycf3	Photosystem I assembly protein Ycf3	173	19.878	1	2	12.1	3	0	7.4754	0.984014	0.370961	19.659	18.9676	21.0542	20.58	17.3835	18.7653
slr0886	FabG	3-oxoacyl-[acyl-carrier-protein] reductase	247	25.723	1	3	13	13	0	14.312	0.981813	0.459242	21.7805	21.7937	22.4022	22.1882	21.5996	19.2431
sll1071	Sll1071	Sll1071 protein	275	30.532	1	1	3.3	1	0.0032895	1.7104	0.977925	1.16614	19.692	19.3808	18.8404	18.3335	17.7931	18.8528
sll5080	Sll5080	Non-heme chloroperoxidase	274	30.078	1	1	4.4	1	0	4.1866	0.976374	0.935273	19.4651	19.1401	18.5722	17.9595	17.4379	18.8508
chr1_11522;slr1793	Chr1_11522	Hypothetical protein [260445 - 261635];slr1793 transaldolase	397;378	43.719	2	13;12	30	33	0	46.336	0.970867	0.677611	23.8891	24.1327	25.2736	24.1096	23.7763	22.497
sll1226;chr1_242478	HoxH	Hydrogenase large subunit	474;502	52.917	2	2;2	4	2	0	2.4323	0.967314	0.616781	19.4023	19.4038	17.6233	18.3541	17.1001	18.0732
sll1484	Sll1484	type 2 NADH dehydrogenase	487	52.818	1	1	2.7	3	0	5.2505	0.961908	0.691062	19.3843	19.7052	18.5967	17.9927	17.4966	19.3112
slr1470	Slr1470	Slr1470 protein	131	14.902	1	1	6.9	6	0	2.56	0.951604	1.9387	19.0118	19.3902	19.4823	18.3626	18.0567	18.6103
slr0695	Slr0695	Slr0695 protein	173	19.049	1	2	5.2	3	0	4.25	0.938882	0.30825	19.5856	19.6592	21.6072	21.3089	17.7144	19.0121
sll1058	DapB	4-hydroxy-tetrahydrodipicolinate reductase	275	29.09	1	2	8	3	0	2.5239	0.933463	0.280653	19.378	19.2345	21.6866	21.0418	17.3097	19.1473
sll0370	Sll0370	carbamoyl-phosphate synthase, pyrimidine-specific, large chain	1105	121.62	1	7	6.3	8	0	10.652	0.932884	0.263954	19.2133	19.6473	21.7839	17.4866	21.4676	18.8916
slr1434	PntB	NAD(P) transhydrogenase subunit beta	480	49.943	1	1	2.1	1	0	2.1028	0.918758	0.737496	19.3012	19.4647	18.2256	18.1096	17.3383	18.7874
sll1620	Sll1620	Sll1620 protein	158	17.177	1	1	6.3	1	0.0032787	1.697	0.917934	0.572821	19.042	19.6829	18.1272	17.9341	17.1299	19.0343
sll1314;chr1_265240	DctP	C4-dicarboxylase binding protein	369;374	41.164	2	2;2	8.1	2	0	4.9552	0.910013	0.827476	19.1071	19.3874	18.2022	17.6944	17.561	18.7113
slr2144	Slr2144	Slr2144 protein	301	33.503	1	2	6.6	2	0.001675	1.886	0.907503	0.784799	18.8591	19.1209	19.8144	18.2794	17.6181	19.1744
slr0585	ArgG	Argininosuccinate synthase	400	44.484	1	11	31.5	15	0	38.357	0.904354	0.529225	22.4408	23.0829	24.3284	22.9298	22.8463	21.363
slr0506	Por	Light-dependent protochlorophyllide reductase	322	36.061	1	4	13	12	0	14.773	0.903392	0.539576	20.8897	21.5278	20.6227	21.254	20.202	18.874
slr1409	Slr1409	WD repeat-containing protein slr1409	326	35.759	1	7	26.4	18	0	32.369	0.900283	0.265	21.5066	22.1246	22.7059	22.6409	22.4032	18.5921
sll0495	Sll0495	asparaginyl-tRNA synthetase	513	58.045	1	1	1.8	1	0.0032733	1.6635	0.878854	0.69116	19.6222	19.3083	18.7161	18.1123	17.5794	19.3184
slr1295	FutA1	Iron uptake protein A1	360	39.37	1	2	5	3	0	2.5999	0.872327	0.616423	19.5884	19.4968	20.3366	17.8463	19.8123	19.1462
chr1_143957;slr0549	Chr1_143957	Hypothetical protein [3248307 - 3249323];slr0549 aspartate beta-semialdehyde dehydrogenese	339;269	36.694	2	4;3	11.8	6	0	8.8632	0.864483	0.409198	20.7388	20.9791	22.24	21.5785	20.7967	18.9892
sll0224	Sll0224	Sll0224 protein	298	32.829	1	3	13.4	6	0	15.231	0.860444	0.419935	19.4922	19.1413	20.8498	20.0555	17.6581	19.1883
slr5051	Slr5051	Phosphomannomutase	130	14.283	1	1	8.5	1	0	3.8025	0.853856	1.20883	18.9107	19.2797	19.7906	18.4433	18.1211	18.8551
slr0502	CobW	CobW protein	352	38.955	1	1	3.4	1	0	3.2532	0.845748	0.705272	19.3096	19.7	18.3911	17.8384	17.969	19.056
sll1479	Pgl	6-phosphogluconolactonase	240	26.482	1	2	8.8	8	0	6.7932	0.83319	0.304151	19.4579	20.0744	21.1188	21.2561	17.819	19.0764
slr0929	Slr0929	Slr0929 protein	195	21.699	1	2	8.2	3	0	3.1031	0.824336	0.453287	19.1432	19.7314	17.423	17.3951	17.7917	18.6378
sll1515	Sll1515	Sll1515 protein	149	16.68	1	1	8.1	1	0	2.3041	0.818851	1.40251	19.4837	19.6541	19.2197	18.5561	18.2604	19.0844
slr0783	TpiA	Triosephosphate isomerase	242	26.158	1	3	14.9	10	0	14.851	0.810712	0.339189	21.2758	21.3844	22.0504	22.1396	21.2197	18.919
slr2123	Slr2123	D-isomer specific 2-hydroxyacid dehydrogenase family	318	34.328	1	1	3.5	1	0	3.8807	0.807781	0.626244	19.3723	19.4128	17.9583	18.4191	17.4488	18.452
slr1783	Slr1783	two-component response regulator NarL subfamily	282	31.395	1	1	3.2	0	0.0033389	1.8746	0.805654	0.403812	19.8451	20.0021	18.0154	19.3236	17.4337	18.6883
slr0148	Slr0148	hypothetical protein	160	17.823	1	3	20	3	0	9.6337	0.798609	0.331302	19.7597	19.5801	20.967	20.8742	17.784	19.2527
sll0329	Gnd	6-phosphogluconate dehydrogenase, decarboxylating	482	52.873	1	7	19.9	18	0	29.514	0.797386	0.444668	23.431	22.6065	24.8026	23.3024	23.1836	21.9619
FLAG	3xFLAG peptide	Cleaved 3xFLAG peptide	19	2.3242	1	5	100	184	0	323.31	0.796462	0.374019	31.8439	31.6932	32.6919	32.9492	30.5466	30.3438
sll1009	FrpC	Iron-regulated protein	591	60.483	1	1	1.9	1	0	2.3447	0.78743	0.383024	19.8412	19.6023	17.8677	19.0276	17.122	18.7994
slr1934	PdhA	Pyruvate dehydrogenase E1 component subunit alpha	342	38.158	1	2	5.6	5	0	12.365	0.78084	0.508181	19.5777	19.464	17.7985	17.7691	17.8666	18.862
slr0513	FutA2	Iron uptake protein A2	346	38.155	1	2	8.4	4	0	6.6689	0.770368	0.366045	19.3532	19.1126	20.6167	20.3192	17.771	18.6812
slr1744	AmiA	N-acetylmuramoyl-L-alanine amidase	649	70.011	1	3	4.8	10	0	7.7948	0.756742	0.242139	19.2317	19.5641	21.5929	21.2577	17.9169	18.9438
sll1341	BfrA	Bacterioferritin	156	18.331	1	1	5.1	4	0	3.941	0.756397	0.38078	19.6224	19.6976	17.5662	17.7186	17.7786	19.1199
slr1963	Slr1963	Orange carotenoid-binding protein	317	34.658	1	14	47.9	49	0	131.35	0.740936	0.691778	26.0715	26.2967	26.8847	26.3077	25.8499	24.8726
sll0199	PetE	Plastocyanin	126	13.146	1	5	66.7	39	0	62.913	0.73315	0.905119	26.2406	25.842	26.0945	26.0011	25.2027	24.7738
slr0710	GdhA	NADP-specific glutamate dehydrogenase	428	47.312	1	2	4.9	5	0	4.9205	0.708209	0.363508	19.3357	19.4841	20.4416	17.8766	20.4041	18.8561
slr0543	TrpB	Tryptophan synthase beta chain	412	45.07	1	3	9.5	4	0	18.131	0.706753	0.202312	19.2183	19.1307	21.8603	21.1963	17.7263	19.1665
slr0431	Slr0431	Slr0431 protein	250	27.011	1	1	5.6	1	0	4.8067	0.704479	0.90385	19.077	19.346	18.6748	18.4504	17.746	18.788
sll1694	HofG	General secretion pathway protein G	168	17.573	1	3	17.3	22	0	17.288	0.704025	0.615656	24.4723	25.1751	25.5059	24.9989	24.4615	23.5808
slr0645	Slr0645	Slr0645 protein	206	22.785	1	2	7.8	3	0	4.3782	0.702168	0.450868	19.7847	19.7543	20.6923	18.7786	20.5663	18.7798
slr1251	Slr1251	peptidyl-prolyl cis-trans isomerase	170	18.404	1	4	28.8	6	0	24.943	0.700248	0.145339	19.2621	22.4713	23.4579	22.5141	22.0623	18.5141
slr1908	Slr1908	Slr1908 protein	591	64.51	1	1	2.7	1	0	2.5945	0.688139	0.515682	19.1631	19.1144	17.8921	18.4362	17.2109	18.4581
sll0258	PsbV	Cytochrome c-550	160	17.884	1	7	54.4	33	0	60.635	0.683081	0.687842	26.051	26.5743	26.5134	26.5034	25.4991	25.087
sll1499	Sll1499	ferredoxin-dependent glutamate synthase	1546	168.35	1	6	5.6	7	0	12.168	0.678757	0.164161	19.3758	19.4984	21.8781	21.9625	17.3818	19.3717
sll0519	NdhA	NAD(P)H-quinone oxidoreductase subunit 1	372	40.548	1	2	7.5	5	0	51.991	0.666896	0.0843127	18.9577	24.3477	24.4447	23.9875	17.6454	24.1165
slr1516	SodB	Superoxide dismutase [Fe]	199	21.677	1	5	42.2	18	0	34.62	0.665717	0.49504	23.9946	24.1812	25.1538	24.5709	23.7967	22.9649
slr0623	TrxA	Thioredoxin	107	11.748	1	6	62.6	41	0	66.612	0.664494	0.460494	25.0362	25.1771	25.6586	25.59	24.7456	23.5429
slr1176	GlgC	Glucose-1-phosphate adenylyltransferase	439	49.366	1	11	30.8	34	0	80.886	0.657701	0.352384	23.2469	23.5228	24.732	23.8456	23.7607	21.9223
sll1070;chr1_280351	TktA	Transketolase	670;676	71.724	2	19;18	39.3	58	0	162.5	0.650579	0.601406	26.1776	26.1754	27.0595	26.3186	26.0787	25.0634
sll1028	CcmK2	Carboxysome shell protein CcmK2	103	11.135	1	6	85.4	41	0	58.464	0.649282	0.734979	25.721	25.9376	26.3606	26.0188	25.2665	24.7861
sll0422	Sll0422	Isoaspartyl peptidase/L-asparaginase	329	34.894	1	2	7	5	0	5.7677	0.637012	0.503414	19.5966	19.4087	20.0562	18.1565	19.9536	19.0403
sll1358	Sll1358	Sll1358 protein	394	43.15	1	1	3	1	0	3.9692	0.635089	0.492255	19.3275	19.3986	17.8176	17.9929	17.9834	18.662
slr0876	Slr0876	Slr0876 protein	409	45.252	1	2	4.9	2	0	2.757	0.625953	0.504521	18.7325	19.3379	19.7057	18.484	17.9163	19.4979
slr0738	TrpE	Anthranilate synthase component 1	508	57.146	1	1	1.8	2	0	2.6458	0.625376	0.270555	19.4917	19.7685	17.6615	19.2983	17.11	18.6372
slr1761	YtfC	Peptidyl-prolyl cis-trans isomerase	201	21.555	1	3	19.4	16	0	23.426	0.621614	0.397955	21.9526	22.7116	22.6787	22.8667	21.8649	20.7464
slr1289	Slr1289	isocitrate dehydrogenase (NADP+)	475	52.258	1	5	10.1	11	0	13.532	0.614747	0.177876	20.7166	21.5339	22.7648	22.5598	21.8588	18.7525
sll1709	Gdh	Glucose dehydrogenase	248	27.44	1	1	3.2	1	0.0064412	1.501	0.613245	0.290544	19.5435	19.4342	17.4618	18.1681	17.3144	19.1171
sll1757	Sll1757	Sll1757 protein	292	31.717	1	2	8.2	4	0	9.597	0.600878	0.400087	19.7917	20.0579	21.312	20.4599	19.9106	18.9884
sll0470	Sll0470	Sll0470 protein	186	20.719	1	1	7.5	4	0	2.6547	0.589966	0.436614	19.3245	19.7312	18.1625	17.8644	19.0297	18.5541
slr0394	Slr0394	phosphoglycerate kinase	400	41.67	1	17	53	72	0	153.38	0.588714	0.474915	26.1957	26.5482	27.1575	26.8049	26.1095	25.2208
ssl2781	Ssl2781	Ssl2781 protein	82	9.655	1	1	11	1	0.0080128	1.4185	0.584806	0.337282	19.4306	18.8457	17.5233	17.6867	17.4702	18.8882
sll0289	MinD	Septum site-determining protein MinD	266	29.047	1	1	4.9	2	0	2.9558	0.581875	0.370016	19.121	18.9962	17.5169	18.1119	17.1908	18.5859
slr0452	IlvD	Dihydroxy-acid dehydratase	561	58.646	1	8	13.5	29	0	35.588	0.581067	0.594566	23.4024	23.7096	24.1618	23.729	23.346	22.4555
sll1184	PbsA1	Heme oxygenase 1	240	27.05	1	1	4.6	1	0	2.1126	0.563688	0.338954	19.2919	19.1385	17.5385	17.5497	17.861	18.8672
sll1099	Tuf	Elongation factor Tu	399	43.733	1	33	79.7	186	0	323.31	0.563552	0.960022	28.0115	28.2218	28.5715	27.953	27.8973	27.2637
slr0536	HemE	Uroporphyrinogen decarboxylase	350	39.152	1	5	17.7	8	0	14.779	0.560077	0.166693	19.1567	21.6581	22.4581	21.4503	21.173	18.9693
ssl3044	Ssl3044	Hydrogenase component	99	10.818	1	1	12.1	4	0	4.3224	0.546382	0.315845	19.9574	19.9231	18.0762	18.1871	19.3608	18.7696
slr1030	ChlI	Magnesium-chelatase subunit ChlI	357	39.463	1	2	5.6	2	0	4.1618	0.546261	0.373334	19.4285	19.2205	18.005	18.8654	17.5019	18.648
slr0009	CbbL	Ribulose bisphosphate carboxylase large chain	470	52.49	1	35	65.5	217	0	323.31	0.545646	1.10062	29.3372	29.7345	29.9575	29.2056	29.3385	28.8482
sll1525	Sll1525	phosphoribulokinase	332	37.914	1	12	39.5	60	0	89.245	0.542768	1.39758	25.3073	25.4735	25.8327	25.1282	25.0423	24.8147
sll0018	FbaA	Fructose-bisphosphate aldolase class 2	359	38.972	1	15	41.5	73	0	166.41	0.536235	0.439532	26.1234	26.4648	27.2436	26.4559	26.5024	25.2648
sll0086	Sll0086	Putative arsenical pump-driving ATPase	396	44.626	1	1	2.5	1	0	2.1178	0.534871	0.240983	19.5749	19.4546	17.4324	17.9174	17.6055	19.3344
ssl3441	Ssl3441	initiation factor IF-1	67	7.736	1	2	17.9	5	0	5.2741	0.520219	0.295269	19.4176	19.527	17.6087	18.8079	17.6467	18.5381
chr1_98563	Chr1_98563	Hypothetical protein [2216136 - 2216393]	86	9.7377	1	1	16.3	2	0	2.458	0.520164	0.359323	19.741	19.325	17.9415	18.2242	18.2185	19.0042
slr1894	Slr1894	Protein slr1894	156	17.755	1	9	54.5	30	0	47.282	0.503319	0.392292	24.1416	24.5716	25.3235	24.7063	24.4674	23.353
sll1663	Sll1663	Sll1663 protein	220	24.104	1	2	10	9	0	8.4376	0.50265	0.207856	19.3739	20.8672	21.7611	20.958	20.6049	18.9312
slr2094	Slr2094	D-fructose 1,6-bisphosphatase class 2/sedoheptulose 1,7-bisphosphatase	345	37.074	1	20	54.8	89	0	257.22	0.501768	0.573173	27.7354	28.0472	28.6569	27.9401	27.9096	27.0846
slr1722	GuaB	IMP dehydrogenase subunit	387	40.234	1	10	33.1	32	0	57.501	0.498693	0.602566	24.0561	24.0746	24.8747	24.2415	23.8998	23.368
ssr1480;sll0517;chr1_175592	Ssr1480	RNA-binding protein	83;101;140	9.3904	3	4;3;3	48.2	17	0	24.346	0.493632	0.53446	23.9455	23.8856	24.1005	23.9199	23.8504	22.6803
slr1096	LpdA	Dihydrolipoyl dehydrogenase	474	50.832	1	3	10.5	7	0	13.596	0.4917	0.126026	19.0779	19.3067	21.7466	21.6936	17.7745	19.1881
slr2101	Slr2101	Slr2101 protein	143	15.348	1	1	6.3	3	0.0016779	1.9153	0.488605	0.18414	19.3052	19.5859	17.3775	18.0337	17.1254	19.6436
sll0928	ApcD	Allophycocyanin subunit alpha-B	161	17.923	1	8	64.6	34	0	125.24	0.488307	0.332479	25.6402	26.1826	26.885	26.5004	25.9049	24.8376
sll1745	RplJ	50S ribosomal protein L10	173	18.675	1	3	14.5	4	0	5.1879	0.487332	0.0960899	22.1887	19.2452	22.1994	17.6761	22.3467	22.1486
slr0245	Slr0245	Uncharacterized protein slr0245	304	33.649	1	2	6.6	3	0	7.3849	0.482829	0.162302	19.5088	19.3776	18.1579	17.9746	17.089	20.5321
slr0879	GcvH	Glycine cleavage system H protein	132	14.58	1	1	7.6	2	0	2.1716	0.482185	0.229415	19.5147	19.524	17.9607	19.3662	17.2659	18.9207
sll1559	Sll1559	Soluble hydrogenase 42 kD subunit	384	40.768	1	13	37.2	45	0	71.878	0.479316	0.491688	25.1702	25.4927	26.0315	25.5816	25.2468	24.4281
slr1718	ComB	Probable 2-phosphosulfolactate phosphatase	241	26.045	1	2	9.5	4	0	5.8417	0.478174	0.23091	19.2634	19.8665	17.9034	19.5273	17.5609	18.5106
ssl0352	Ssl0352	Ssl0352 protein	58	6.5774	1	5	82.8	26	0	36.154	0.472633	0.820031	24.6507	24.8586	24.864	24.8333	24.0747	24.0474
sll1029	CcmK1	Carboxysome shell protein CcmK1	111	12.102	1	11	70.3	41	0	98.853	0.470149	0.383509	26.004	26.4363	27.0274	26.5228	26.3533	25.1811
slr0528;chr1_141269	MurE	UDP-N-acetylmuramoyl-L-alanyl-D-glutamate--2,6-diaminopimelate ligase	505;560	54.6	2	1;1	2.4	1	0	2.4685	0.469801	0.449294	19.4017	18.8754	18.0446	17.8848	18.4279	18.5997
sll1234	AhcY	Adenosylhomocysteinase	425	46.213	1	9	27.3	26	0	89.91	0.458553	0.531402	23.8125	23.7828	24.8947	23.815	23.8011	23.4981
sll1633	FtsZ	Cell division protein FtsZ	430	44.773	1	1	3.3	1	0	2.7111	0.458047	0.276859	19.413	19.3462	17.7646	17.6168	18.6471	18.8857
sll0576	Sll0576	HrEpiB	312	34.951	1	6	20.2	24	0	32.495	0.454497	0.652378	22.8725	22.5793	23.1334	22.8953	21.9575	22.3688
slr1852	Slr1852	Slr1852 protein	188	21.834	1	7	38.8	28	0	28.182	0.451927	0.324127	23.8684	24.4227	24.9355	24.6396	24.2066	23.0247
slr1044	McpA	Methyl-accepting chemotaxis protein	869	93.209	1	4	5.2	15	0	19.577	0.437234	0.618256	21.4603	22.0395	21.4688	21.3915	21.5454	20.7199
ssr1528	Ssr1528	Ssr1528 protein	94	10.118	1	7	56.4	32	0	68.649	0.436762	0.287852	24.4643	25.1429	25.254	25.4564	24.5783	23.5162
ssl0707	GlnB	Nitrogen regulatory protein P-II	112	12.397	1	10	82.1	42	0	86.153	0.43664	0.468292	25.9247	26.1006	26.4682	26.412	25.632	25.1394
slr1273	Slr1273	Slr1273 protein	146	15.714	1	2	15.8	6	0	5.535	0.434727	0.17962	19.3679	19.8927	17.3167	17.8622	18.0341	19.3767
slr1020	SqdB	Sulfolipid biosynthesis protein SqdB	383	43.202	1	7	23	16	0	22.922	0.433384	0.34518	22.7346	23.1297	23.775	23.4373	22.9112	21.9908
slr0012	CbbS	Ribulose bisphosphate carboxylase small subunit	113	13.239	1	6	62.8	48	0	94.864	0.414797	1.26627	28.7575	28.7823	29.1998	28.5763	28.527	28.3919
slr0013	Slr0013	Slr0013 protein	175	18.69	1	3	23.4	10	0	14.622	0.41251	0.148313	19.5607	19.6342	17.5099	18.0773	17.4161	19.9738
slr0261;chr1_66945	Slr0261	NADH dehydrogenase subunit 7;chr1_66945 Hypothetical protein [15	384;396	44.347	2	16;16	40.4	51	0	59.079	0.404737	2.08784	25.4362	25.5432	25.4606	25.2175	24.9558	25.0525
sll1317	PetA	Cytochrome f	328	35.23	1	7	22.6	24	0	42.383	0.403975	0.373426	23.5232	24.0407	24.5267	23.868	24.0719	22.9389
slr0039	Slr0039	Uncharacterized protein slr0039	357	38.418	1	1	2.5	2	0.0033058	1.7665	0.398218	0.376713	19.5225	19.0102	18.2006	18.3358	18.2514	18.9513
slr0032	IlvE	Probable branched-chain-amino-acid aminotransferase	305	33.951	1	6	26.9	9	0	14.421	0.393838	0.446793	21.0087	21.639	22.2987	21.2574	21.3759	21.1316
sll1194	PsbU	Photosystem II 12 kDa extrinsic protein	131	14.245	1	6	48.1	32	0	52.604	0.38732	0.284164	25.3666	25.6823	26.2076	26.165	25.46	24.4695
slr1022	ArgD	Acetylornithine aminotransferase	429	46.567	1	3	7.2	7	0	9.5875	0.385418	0.214475	19.3238	19.4043	17.3305	17.9984	18.5676	18.3364
slr1826	Slr1826	hypothetical protein	130	14.322	1	1	7.7	3	0	4.803	0.381493	0.192384	19.4312	19.806	17.892	17.7024	19.2617	19.0206
slr0483;chr1_115955	Slr0483	Slr0483 protein	149;162	16.885	2	4;4	21.5	16	0	18.798	0.377321	0.294785	21.895	22.8152	22.921	22.898	22.096	21.5052
slr0164	ClpR	Putative ATP-dependent Clp protease proteolytic subunit-like	225	24.881	1	4	19.6	11	0	26.474	0.370146	0.123708	21.7134	20.0474	22.6082	21.8025	21.9597	19.4964
sll0227	Sll0227	Probable peptidyl-prolyl cis-trans isomerase sll0227	246	26.58	1	4	26	14	0	13.061	0.369101	0.0865685	19.4272	22.0807	22.368	22.0199	22.2011	18.5476
sll1470	LeuC	3-isopropylmalate dehydratase large subunit	468	50.458	1	3	6.8	8	0	9.677	0.367418	0.179438	19.2727	20.9232	20.9432	20.3562	20.7405	18.9402
sll1418;chr1_246215	Sll1418	Sll1418 protein	188;205	20.747	2	3;3	18.6	13	0	21.774	0.365178	0.189692	20.503	21.0473	21.4391	21.4098	21.2181	19.266
sll0144	PyrH	Uridylate kinase	260	27.651	1	1	4.2	3	0	3.9952	0.35482	0.118413	19.8054	19.9606	17.569	19.9426	17.3114	19.0165
sll0065	IlvH	Acetolactate synthase small subunit	172	18.871	1	1	4.1	1	0	2.9631	0.346339	0.204599	19.3812	19.1246	17.5004	18.3892	17.8006	18.7775
sll1471	CpcL	Photosystem I-associated linker protein CpcL	249	28.522	1	12	54.2	41	0	61.944	0.342867	0.817124	24.6894	25.1895	25.2249	24.8245	24.727	24.5238
sll0274	Sll0274	Sll0274 protein	196	21.473	1	2	11.7	4	0	3.6951	0.340092	0.141428	19.4596	19.116	20.7188	20.9003	18.4974	18.8764
slr1986	ApcB	Allophycocyanin beta chain	161	17.215	1	14	92.5	124	0	239.56	0.338904	0.388708	30.277	30.5598	30.9815	30.6653	30.4688	29.6674
sll0689	NhaS3	High-affinity Na(+)/H(+) antiporter NhaS3	461	47.871	1	1	1.5	3	0	2.9245	0.332602	0.159334	19.7414	20.0243	18.0247	18.0113	19.5769	19.2044
slr1463	FusA	Elongation factor G 1	695	76.749	1	23	38.1	62	0	119.27	0.327747	0.317723	24.3582	24.7122	25.4405	24.7487	24.8229	23.9562
sll1342	Sll1342	NAD(P)-dependent glyceraldehyde-3-phosphate dehydrogenase	337	36.492	1	18	57.3	82	0	250.07	0.323795	0.844103	26.7242	26.9804	27.2325	26.8021	26.7017	26.4619
sll0145	Frr	Ribosome-recycling factor	182	20.186	1	4	18.1	13	0	19.486	0.32235	0.278509	21.7314	22.1755	22.7573	22.5254	21.887	21.2847
slr1751	Prc	Carboxyl-terminal protease	423	46.832	1	12	32.6	21	0	48.428	0.311581	0.0673087	21.2288	19.9425	23.2808	22.8412	22.0419	18.6343
sll0529	Sll0529	Sll0529 protein	731	78.316	1	18	37.3	50	0	114.04	0.304394	0.237514	25.0772	25.3145	26.1019	25.6928	25.481	24.4066
slr2024;chr1_34160	Slr2024	CheY subfamily	180;203	20.233	2	2;2	11.1	4	0	2.4416	0.301507	0.114694	19.4721	19.6604	17.3537	17.3288	19.2516	19.0013
sll0617	Sll0617	Protein sll0617	267	28.905	1	8	34.1	34	0	67.904	0.297339	0.217333	23.651	23.585	24.4464	24.2987	23.7466	22.745
sll1784	Sll1784	Sll1784 protein	267	29.757	1	3	13.1	10	0	31.355	0.296832	0.0610017	19.5304	22.3059	22.9794	22.9441	22.2793	18.7018
slr0535	Slr0535	Serine proteinase	613	65.878	1	1	2	1	0	3.9827	0.295651	0.184459	19.5647	19.2625	17.6875	18.3448	18.366	18.917
sll0837	Sll0837	Sll0837 protein	294	32.906	1	2	6.8	6	0	9.8846	0.295232	0.147629	19.352	20.5168	21.0873	20.6235	20.5039	18.9431
sll0781	Sll0781	Sll0781 protein	155	18.634	1	2	23.2	2	0.0065147	1.6125	0.293912	0.124866	19.2729	19.751	17.1711	18.7707	17.762	18.7805
sll0927;chr1_302301	Sll0927	S-adenosylmethionine synthetase;chr1_302301 Hypothetical protein	409;436	43.898	2	5;5	12	9	0	12.699	0.292721	0.287635	21.4358	21.5563	22.6323	21.7357	21.74	21.2706
slr0659	PrlC	oligopeptidase A	713	80.296	1	1	1.4	3	0	1.9475	0.291345	0.198518	19.6709	19.0985	17.8594	18.7583	18.2213	18.7751
slr0752	Eno	Enolase	432	46.528	1	5	15.5	24	0	34.3	0.288654	0.451487	23.3991	23.7452	24.2481	23.6825	23.5721	23.2718
sll0319	Sll0319	Sll0319 protein	297	32.315	1	1	3.7	2	0	3.8025	0.284303	0.123634	19.6907	19.7311	17.3881	18.1541	19.2699	18.533
sll0587;chr1_185846	Sll0587	pyruvate kinase;chr1_185846 Hypothetical protein [2959529 - 2958	473;497	51.993	2	17;17	55.4	105	0	323.31	0.279879	0.297017	28.6043	28.5969	27.5757	27.8804	27.744	28.3129
sll1577	CpcB	C-phycocyanin beta subunit	172	18.126	1	16	83.7	220	0	323.31	0.273958	0.42903	31.9655	32.2434	32.3316	32.2313	32.0719	31.4153
slr0244	Slr0244	Slr0244 protein	284	31.204	1	5	19.4	10	0	13.857	0.273401	0.921489	21.9984	21.9364	22.2442	21.8306	21.9363	21.5919
sll1841	OdhB	Dihydrolipoamide acetyltransferase component of pyruvate dehydrogenase complex	433	44.898	1	4	14.1	8	0	12.473	0.270037	0.0733802	22.1622	19.4621	22.1241	22.0115	21.8069	19.1199
ssr2799	RpmA	50S ribosomal protein L27	87	9.4485	1	3	31	12	0	12.333	0.265441	0.236121	24.1731	23.606	22.9165	22.8625	23.3017	23.7351
slr0165	ClpP3	Probable ATP-dependent Clp protease proteolytic subunit 3	202	22.397	1	5	29.7	9	0	29.193	0.265169	0.0621608	21.8595	19.1773	23.12	22.1121	21.9631	19.2861
slr1643	PetH	Ferredoxin--NADP reductase	413	46.359	1	17	52.5	64	0	153.38	0.264329	1.74644	26.1567	26.2233	26.1394	26.0352	25.8485	25.8426
ssl1690	NdhO	NAD(P)H-quinone oxidoreductase subunit O	72	8.2885	1	4	65.3	18	0	44.355	0.263039	0.743394	24.877	25.1732	25.0756	24.9012	24.9301	24.5054
slr1281	NdhJ	NAD(P)H-quinone oxidoreductase subunit J	179	20.593	1	4	17.3	28	0	19.771	0.261026	0.620822	23.9027	23.9101	24.2863	23.8163	23.9899	23.5099
slr2067	ApcA	Allophycocyanin alpha chain	161	17.412	1	12	80.1	100	0	323.31	0.256868	0.251093	30.8682	31.1368	31.5901	31.521	30.9811	30.3224
slr1857	GlgX	1,4-alpha-glucan branching enzyme	707	79.894	1	3	3.7	5	0	6.8205	0.256677	0.0668513	19.3869	19.9564	17.4747	17.8533	17.3159	20.8788
sll0421	PurB	Adenylosuccinate lyase	431	48.42	1	5	13.2	12	0	29.894	0.255414	0.267795	21.2238	21.4072	22.0041	21.5299	21.6456	20.6934
slr0899	CynS	Cyanate hydratase	149	16.532	1	3	24.2	12	0	11.111	0.242111	0.256079	21.7298	21.9425	22.6337	22.2407	21.9722	21.3668
sll1830	Sll1830	Sll1830 protein	358	39.648	1	5	13.1	18	0	15.658	0.241165	0.9499	22.5923	22.7684	22.5153	22.2728	22.3126	22.5672
sll0757	PurF	Amidophosphoribosyltransferase	495	53.67	1	2	6.1	2	0	5.7333	0.238623	0.121494	19.4729	19.3147	17.6424	18.8379	17.7599	19.1163
slr0665	AcnB	Aconitate hydratase B	868	93.551	1	4	5.3	15	0	25.321	0.237896	0.0880793	19.3462	20.7262	21.7768	21.2129	20.8302	19.0923
slr1846	Slr1846	Uncharacterized monothiol glutaredoxin ycf64-like	107	11.94	1	1	10.3	3	0	5.0517	0.236198	0.112568	19.529	19.7088	17.7152	17.9343	19.3062	19.0039
sll1883	ArgJ	Arginine biosynthesis bifunctional protein ArgJ	413	43.32	1	4	11.4	8	0	17.58	0.23314	0.0849519	19.7518	21.2706	21.9317	21.8329	21.0544	19.3674
slr1367	GlgP	Alpha-1,4 glucan phosphorylase	855	98.304	1	5	6	7	0	6.7095	0.227138	0.085291	19.5751	20.9877	21.6383	21.1947	21.2607	19.0644
sll1712	Hup	DNA-binding protein HU	100	10.891	1	8	52	35	0	31.836	0.221909	0.207123	24.7385	25.4749	25.5774	25.5488	25.1242	24.4521
sll1583	Lig	DNA ligase	562	61.468	1	5	10.1	19	0	22.049	0.221503	1.19467	22.2809	22.2827	22.0214	21.9776	21.9587	21.9842
sll0915	PqqE	Protease	524	59.588	1	1	2.1	1	0	3.7661	0.220889	0.127803	19.2769	19.4738	17.6657	18.1433	18.5303	19.0801
slr1046	TatA	Sec-independent protein translocase protein TatA	126	13.673	1	2	19.8	3	0	6.2867	0.219181	0.119179	19.3983	20.5439	20.8484	20.6568	20.4318	19.0444
sll0244	GalE	UDP-glucose 4-epimerase	338	37.13	1	7	27.5	20	0	19.811	0.21468	0.475716	23.4449	23.3472	23.0773	22.9809	22.8538	23.3907
sll1325	AtpH	ATP synthase subunit delta	185	20.093	1	5	30.3	19	0	25.802	0.21118	0.765695	23.7387	23.9214	23.859	23.4493	23.8432	23.5931
sll1578;chr1_284463	CpcA	C-phycocyanin alpha subunit	162;174	17.586	2	15;14	93.8	183	0	323.31	0.210178	0.362861	32.569	32.6955	33.0472	32.8928	32.5704	32.218
sll1837	Sll1837	Sll1837 protein	145	15.467	1	1	8.3	2	0	5.8882	0.20834	0.125574	19.3432	19.2342	17.985	17.9315	18.6094	19.3966
slr1459	ApcF	Allophycocyanin subunit beta-18	169	18.892	1	9	58	61	0	109.41	0.205979	0.338601	25.8005	25.9447	26.4939	26.0948	25.9011	25.6252
slr2049	CpcS2	Chromophore lyase CpcS/CpeS 2	192	21.946	1	1	5.7	3	0	3.8182	0.200979	0.0849731	19.2756	19.6728	17.397	19.2121	17.6896	18.8408
sll1734	Sll1734	Sll1734 protein	431	50.038	1	11	27.1	42	0	70.326	0.200841	0.927139	25.2787	25.5031	25.5866	25.2014	25.3389	25.2256
sll1621	Sll1621	Peroxiredoxin sll1621	189	21.167	1	10	38.6	37	0	33.676	0.200765	0.209477	25.4105	25.6314	25.7535	26.0925	25.1958	24.9049
sll0020;slr1641;slr0156	ClpC	ATP-dependent Clp protease regulatory subunit	821;872;898	91.173	3	4;2;2	5.2	10	0	13.77	0.199115	0.79595	21.6454	21.7438	21.7868	21.5975	21.6667	21.3145
sll0902	ArgF	Ornithine carbamoyltransferase	308	33.616	1	1	2.6	1	0	3.369	0.197915	0.0951807	19.0742	19.5963	17.5537	18.3765	17.9125	19.3413
sll0554	FtrC	Ferredoxin-thioredoxin reductase, catalytic chain	118	13.39	1	1	6.8	6	0	3.3061	0.194627	0.0750911	19.3593	19.5606	18.0732	18.325	17.7516	20.3327
sll1994	HemB	Delta-aminolevulinic acid dehydratase	327	36.163	1	11	27.5	28	0	37.005	0.191877	0.310118	23.5024	24.1475	24.0033	23.8578	23.8469	23.3729
sll1338	Sll1338	Sll1338 protein	187	20.183	1	1	7.5	5	0	2.7451	0.190049	0.0801837	19.1145	19.8844	17.1707	18.161	18.9178	18.5207
ssl3364	Ssl3364	Ssl3364 protein	74	8.2948	1	2	27	12	0	24.787	0.185834	0.127306	22.5931	23.6358	23.9369	23.6526	23.4363	22.5193
slr1198	Slr1198	Rehydrin	211	23.559	1	14	59.2	83	0	101.15	0.184252	0.400451	27.0379	27.2859	27.3906	27.3686	26.9784	26.8147
sll0533	Tig	Trigger factor	471	52.61	1	5	10	12	0	16.1	0.176167	0.191233	21.737	22.1534	22.7573	22.3573	22.0674	21.6945
sll0755	Sll0755	Putative peroxiredoxin sll0755	200	22.509	1	1	3.5	2	0	3.5293	0.174113	0.135181	19.3433	19.219	18.1636	18.1918	19.1951	18.8167
ssr2857	Ssr2857	Ssr2857 protein	64	6.6855	1	1	17.2	2	0	8.2951	0.173152	0.0538129	19.3156	19.6456	17.8452	20.4194	17.0914	18.7762
slr0335	ApcE	Phycobiliprotein ApcE	896	100.29	1	44	58	211	0	323.31	0.172985	0.389342	27.6791	27.9537	28.0855	27.9528	27.7847	27.4619
sll1398	Psb28	Photosystem II reaction center Psb28 protein	112	12.59	1	3	36.6	11	0	32.809	0.166044	0.0297299	19.5414	22.9005	23.2289	23.4865	22.8676	18.8185
sll1867;slr1311;slr1181	PsbA2	Photosystem II protein D1 2	360;360;360	39.721	3	6;6;3	20.3	36	0	65.293	0.165263	1.05925	25.7131	25.6818	25.8479	25.5156	25.545	25.6864
chr1_89481	Chr1_89481	Hypothetical protein [2012718 - 2013482]	255	28.702	1	1	4.7	2	0	4.2888	0.165138	0.0709288	19.2734	19.4639	17.4365	19.46	17.7472	18.4712
sll1336	Sll1336	Sll1336 protein	705	78.327	1	3	4.8	5	0	8.5238	0.160156	0.080935	19.0524	19.22	17.7778	17.7513	19.5386	18.2799
slr2051	CpcG	Phycobilisome rod-core linker polypeptide CpcG	249	28.901	1	23	79.5	122	0	281.9	0.158603	0.241836	28.6161	28.953	29.1884	29.0831	28.7996	28.3991
sll1891	Sll1891	Sll1891 protein	252	26.435	1	1	5.2	4	0	3.3424	0.156394	0.0656869	19.1322	19.6888	17.5012	17.7039	19.4559	18.6934
sll0427	PsbO	Photosystem II manganese-stabilizing polypeptide	274	29.911	1	10	36.9	45	0	96.992	0.156113	0.126094	26.1025	26.6327	26.9792	27.0361	26.4698	25.7402
ssl3093	CpcD	Phycobilisome 8.9 kDa linker polypeptide, phycocyanin-associated, rod	83	9.3222	1	9	96.4	75	0	202.47	0.155408	0.434995	27.551	27.6674	27.8958	27.7567	27.5307	27.3606
sll0103	Sll0103	Uncharacterized protein sll0103	420	45.849	1	1	2.1	2	0	2.6646	0.146924	0.0579746	19.3896	19.3393	17.238	19.2619	17.5219	18.7423
sll1687	Sll1687	Sll1687 protein	970	109.82	1	5	5.2	11	0	13.93	0.145342	0.0265794	21.4464	22.0671	17.4297	17.9382	21.1497	21.4194
sll1873	Sll1873	Sll1873 protein	121	12.906	1	5	71.9	24	0	29.588	0.13828	0.0956266	23.2933	24.2116	23.9792	24.5624	23.1977	23.3092
slr0520	PurQ	Phosphoribosylformylglycinamidine synthase subunit PurQ	224	24.428	1	1	4.5	0	0	2.0681	0.1357	0.0516887	19.1722	19.828	17.3827	17.5989	19.161	19.216
ssr2831	PsaE	Photosystem I reaction center subunit IV	74	8.145	1	6	83.8	37	0	224.66	0.133802	0.243354	28.4651	28.5804	27.966	28.2451	27.9997	28.3654
sll1363	Sll1363	ketol-acid reductoisomerase	367	39.951	1	12	43.1	48	0	99.62	0.128262	0.473782	25.316	25.1695	25.5126	25.2065	25.3115	25.0953
sll0520	NdhI	NAD(P)H-quinone oxidoreductase subunit I	193	22.15	1	12	46.1	56	0	36.474	0.123866	0.301055	25.1093	25.3075	25.0928	25.1972	25.1994	24.7413
sll1746	RplL	50S ribosomal protein L7/L12	128	13.259	1	7	59.4	32	0	78.041	0.12313	0.301667	27.2325	27.2813	27.3342	27.4778	27.0637	26.937
sll0320	Rnd	Ribonuclease D	217	24.403	1	1	5.1	6	0	3.712	0.121185	0.0543646	19.0832	19.3673	17.7898	18.0148	18.045	19.8169
sll1262	NdhN	NAD(P)H-quinone oxidoreductase subunit N	161	17.629	1	5	35.4	15	0	39.406	0.104532	0.188144	23.7675	24.1312	23.6069	23.4876	23.9896	23.7148
sll0019	Dxr	1-deoxy-D-xylulose 5-phosphate reductoisomerase	394	42.532	1	1	2.8	4	0	2.1039	0.104305	0.0484423	19.2836	19.9237	17.5771	18.3645	19.1229	18.984
slr1165	Sat	Sulfate adenylyltransferase	390	43.695	1	7	19.7	10	0	17.088	0.0983359	0.121167	21.8484	22.0102	22.4649	22.1473	22.3237	21.5575
slr1329	AtpD	ATP synthase subunit beta	483	51.732	1	20	65	128	0	245.25	0.0899385	0.329172	28.6514	28.8495	28.5478	28.686	28.4573	28.6356
sll0170	DnaK2	Chaperone protein DnaK2	636	67.613	1	23	40.7	89	0	143.01	0.0891482	0.115978	25.7572	25.949	26.3926	26.2165	26.076	25.5388
ssl1046	Ssl1046	Ssl1046 protein	84	9.1387	1	1	13.1	3	0	4.472	0.0868861	0.0301674	19.5144	19.442	17.4982	18.0641	17.9798	20.15
slr1756	Slr1756	glutamate--ammonia ligase	473	52.999	1	16	40.8	97	0	133.76	0.0843487	0.204215	26.9853	27.1575	27.425	27.2056	27.1947	26.9146
ssl0020	PetF	Ferredoxin-1	97	10.363	1	1	7.2	4	0	2.1367	0.083559	0.0339432	19.2483	19.2068	17.0834	18.5752	17.6304	19.0823
slr1600	Slr1600	Slr1600 protein	149	17.13	1	1	7.4	5	0	5.4118	0.0801856	0.0322226	19.1762	19.6417	17.1745	17.8634	19.0212	18.8672
slr0952	Fbp	Fructose-1,6-bisphosphatase class 1	347	38.262	1	2	6.1	3	0	4.9225	0.0799694	0.0307059	19.9472	19.1894	17.4613	18.0693	19.6915	18.5972
slr0927;sll0849	PsbD	Photosystem II D2 protein	352;352	39.492	2	5;5	18.5	25	0	34.664	0.0775553	0.273904	25.559	25.929	25.7471	25.7252	25.5941	25.6832
sll1783	Sll1783	Uncharacterized protein sll1783	147	16.822	1	1	8.8	2	0	4.3575	0.0714874	0.0337634	19.1997	19.1817	17.4516	17.7043	19.017	18.8972
sll1805	RplP	50S ribosomal protein L16	139	16.035	1	3	26.6	14	0	12.264	0.0712827	0.107894	23.5176	23.0935	22.8095	23.0513	22.869	23.2864
sll1213	Fcl	GDP-L-fucose synthase	312	34.719	1	6	21.8	24	0	28.413	0.0688883	0.0717044	23.1846	23.147	23.7229	23.8135	23.1739	22.8604
slr0844	NdhF	NAD(P)H-quinone oxidoreductase chain 5	681	74.399	1	1	1	1	0.0032949	1.7403	0.0653795	0.032369	19.0537	19.6376	17.6796	18.0123	19.1212	19.0414
sll0359;chr1_221462	Sll0359	hypothetical protein;chr1_221462 Hypothetical protein [2146473 -	128;157	14.082	2	9;8	69.5	33	0	69.118	0.0639235	0.142756	25.2489	25.6327	25.5764	25.3546	25.2652	25.6464
slr1984	Rps1b	30S ribosomal protein S1 homolog B	305	33.795	1	2	6.2	5	0	8.3377	0.0620073	0.015378	21.6814	19.0162	21.9155	21.5136	22.0026	18.911
sll1450	NrtA	Nitrate/nitrite binding protein NrtA	446	48.966	1	10	26.2	39	0	81.994	0.0619577	0.052064	23.5709	24.2405	24.4257	24.4733	24.169	23.409
slr1622	Ppa	Inorganic pyrophosphatase	169	19.088	1	4	23.7	6	0	29.202	0.0527668	0.00841633	19.2219	23.1983	23.8521	23.779	23.2166	19.1184
sll0947	Hpf	Ribosome hibernation promotion factor	191	21.895	1	7	58.1	31	0	55.447	0.049312	0.101605	24.1474	24.42	24.0098	24.2964	24.2397	23.8931
slr1322	Slr1322	Metalloprotease slr1322	489	53.129	1	1	2	2	0	3.2147	0.0479628	0.018749	19.7594	19.4869	17.5154	19.2862	17.9284	19.4033
ssl2874	Ssl2874	Putative regulatory protein ssl2874	89	9.8693	1	2	15.7	9	0	10.175	0.0476227	0.0614839	21.3669	21.0313	21.4162	20.7442	21.4832	21.444
ssr3383	Ssr3383	phycobilisome small core linker polypeptide	67	7.8051	1	7	79.1	28	0	40.307	0.0468934	0.0208956	24.9136	26.2951	26.5411	26.9409	25.555	25.1133
slr1854	Slr1854	Slr1854 protein	198	22.293	1	5	23.2	13	0	21.464	0.0443255	0.0278679	21.9816	22.1139	22.9955	22.8122	22.681	21.4647
slr0118	ThiC	Phosphomethylpyrimidine synthase	459	51.137	1	2	4.4	2	0	6.6276	0.0415484	0.0247429	19.22	19.3934	17.8474	18.2254	19.0286	19.0822
slr1280	NdhK1	NAD(P)H-quinone oxidoreductase subunit K 1	248	27.345	1	12	50.8	58	0	78.535	0.0365073	0.108759	26.1329	26.4	26.4931	26.2738	26.4132	26.2294
smr0006	PsbF	Cytochrome b559 subunit beta	44	4.9328	1	1	38.6	14	0	27.036	0.0354385	0.0628441	23.8522	24.2096	23.9435	23.7867	23.8185	24.2939
slr1645	Slr1645	photosystem II 11 kD protein	135	14.917	1	4	49.6	14	0	12.227	0.0304546	0.0931076	23.2521	23.4247	23.4345	23.4995	23.1541	23.3664
sll0851	PsbC	Photosystem II CP43 reaction center protein	460	50.302	1	12	25.4	54	0	89.753	0.02598	0.22173	26.6431	26.6798	26.7888	26.6516	26.6897	26.6925
slr0550	DapA	4-hydroxy-tetrahydrodipicolinate synthase	301	31.821	1	4	15.6	10	0	16.373	0.0185935	0.00796106	19.3557	19.1094	21.2701	20.362	20.1103	19.2071
sll0712	CysM	Cysteine synthase	325	34.734	1	1	3.1	5	0	7.3939	0.0159251	0.00594249	19.0245	19.1375	17.2331	17.3418	19.5086	18.4969
slr1469	RnpA	Ribonuclease P protein component	124	14.498	1	2	16.9	2	0	2.275	0.0147285	0.0039601	19.437	19.6651	17.648	18.0362	17.7038	20.9659
sll1787	RpoB	DNA-directed RNA polymerase subunit beta	1102	123.36	1	15	17	38	0	50.136	0.0135708	0.0556532	23.2781	23.5047	23.309	23.3347	23.2809	23.4354
slr2075	GroES	Co-chaperonin GroES	103	10.859	1	8	68	47	0	73.02	0.0094471	0.0181755	25.9854	26.2538	26.3925	26.3751	26.2691	25.9592
slr0942	Slr0942	Aldo/keto reductase slr0942	327	36.014	1	1	4	4	0	7.1247	0.00666364	0.00261286	18.997	19.3465	17.6539	19.708	17.4572	18.8121
sll1580	CpcC1	Phycobilisome 32.1 kDa linker polypeptide, phycocyanin-associated, rod 1	291	32.52	1	17	63.6	107	0	209.1	0.00368182	0.00522763	28.7628	29.2675	29.4765	29.335	29.1397	29.021
sll1106	Sll1106	Sll1106 protein	171	18.031	1	5	42.7	18	0	48.386	0.00321706	0.00462703	23.5713	24.2297	24.1553	23.8834	24.1663	23.8969
slr1274	PilM	Membrane protein	367	40.879	1	1	2.5	2	0	2.0779	-0.00482305	0.00168862	19.529	19.8385	17.4978	18.2057	20.0876	18.5865
slr1106	Phb	Prohibitin	282	30.569	1	6	19.5	21	0	19.249	-0.00741132	0.00790297	22.2848	22.811	22.0925	22.1044	22.8351	22.271
slr0453	Slr0453	hypothetical protein	821	92.447	1	16	22.7	42	0	51.626	-0.0104739	0.014547	24.5265	24.5031	23.928	24.2655	24.1327	24.5908
chr1_309173	Chr1_309173	Hypothetical protein [179192 - 179139]	18	1.9663	1	1	55.6	4	0.0016722	1.886	-0.0138283	0.00397528	19.2115	19.5105	17.2157	17.8276	17.7302	20.4214
sll1327	AtpG	ATP synthase gamma chain	314	34.605	1	9	36.9	38	0	112.55	-0.0211004	0.100433	25.2257	25.1747	25.0123	25.1171	25.2374	25.1216
ssr1600	Ssr1600	similar to anti-sigma f factor antagonist	116	12.661	1	1	9.5	5	0	5.794	-0.0342388	0.0134846	18.9734	19.094	17.5158	18.1976	17.6289	19.8594
slr2034	Ycf48	Photosystem II assembly lipoprotein Ycf48	342	37.29	1	6	17.5	16	0	25.876	-0.0384502	0.0962222	21.7325	21.895	22.1441	22.0068	22.0699	21.8103
slr1417	Slr1417	Uncharacterized protein slr1417	118	12.929	1	1	8.5	1	0	2.0217	-0.0433617	0.0181722	19.2773	19.3392	17.5771	17.9535	19.8027	18.5675
sml0006	RpmJ	50S ribosomal protein L36	38	4.4555	1	1	26.3	6	0	3.3943	-0.0436764	0.0216816	19.051	19.7156	17.6938	18.2961	19.3744	18.921
sll0735	Sll0735	Sll0735 protein	529	62.075	1	3	5.5	5	0	4.7148	-0.0450789	0.011047	21.1298	21.3499	17.7752	20.8392	20.7967	18.7541
sll1326	AtpA	ATP synthase subunit alpha	503	53.965	1	20	45.9	117	0	267.96	-0.0459131	0.203958	27.9647	27.9913	27.8104	27.8564	27.9623	28.0853
slr1623	NdhM	NAD(P)H-quinone oxidoreductase subunit M	121	14.078	1	6	57.9	24	0	23.873	-0.0479329	0.0521406	23.4715	24.0056	24.0653	23.7099	24.3972	23.5791
sll1789	RpoC2	DNA-directed RNA polymerase subunit beta	1317	144.78	1	12	9	44	0	40.672	-0.050951	0.0943823	23.879	23.9815	23.8379	23.5745	24.127	24.1497
slr1655	PsaL	Photosystem I reaction center subunit XI	157	16.624	1	4	30.6	35	0	55.665	-0.0538146	0.0802314	27.8364	28.0796	27.5523	27.6377	27.7601	28.232
slr1835	PsaB	Photosystem I P700 chlorophyll a apoprotein A2	731	81.291	1	9	11.4	53	0	84.742	-0.0544135	0.137309	27.6029	27.662	27.3935	27.5118	27.4612	27.8487
ssl1918	Ssl1918	Ssl1918 protein	97	11.332	1	1	7.2	4	0	2.0487	-0.0639566	0.0264742	19.3111	19.366	17.6335	19.8168	17.8189	18.8667
slr0906	PsbB	Photosystem II CP47 reaction center protein	507	55.902	1	14	37.3	59	0	125.93	-0.0682659	0.264773	26.5487	26.7737	26.7724	26.6792	26.9067	26.7137
slr2001	CphB	Cyanophycinase	271	29.389	1	1	4.8	5	0	7.157	-0.0738627	0.0363752	19.598	19.2486	17.7745	18.1872	19.549	19.1065
smr0010	PetG	Cytochrome b6-f complex subunit 5	38	4.175	1	1	21.1	5	0	2.356	-0.0898908	0.030466	19.0891	19.5454	18.0006	18.2105	17.9686	20.7257
sll1031	CcmM	Carboxysome assembly protein CcmM	687	73.12	1	12	21	43	0	52.148	-0.093708	0.420077	24.249	24.4589	24.5476	24.5791	24.4627	24.4948
sll1323	AtpF2	ATP synthase subunit b	143	16.245	1	5	34.3	14	0	44.572	-0.0979182	0.571816	23.7108	23.8011	23.8334	24.0084	23.8462	23.7845
ssl3445	RpmE	50S ribosomal protein L31	81	9.3036	1	4	69.1	8	0	8.2416	-0.10124	0.0197669	19.0348	23.1615	22.2778	22.5966	22.8923	19.2889
slr0041;chr1_140658	CmpB	Bicarbonate transport system permease protein CmpB	280;288	31.023	2	1;1	3.2	2	0	3.0029	-0.107079	0.0444145	19.2524	19.4879	17.9449	17.6838	19.8575	19.4652
sll0588	Sll0588	Sll0588 protein	153	16.516	1	1	5.2	6	0	3.369	-0.112899	0.0271545	19.4639	19.5816	17.623	18.0882	17.4581	21.4609
sll1306	Sll1306	Sll1306 protein	335	38.27	1	2	5.7	5	0	7.4506	-0.115858	0.0350501	19.3367	19.1245	21.6474	21.1791	20.6394	18.6376
slr1703	SerS	Serine--tRNA ligase	430	48.037	1	1	1.9	1	0.0064935	1.598	-0.116135	0.039947	19.498	19.7361	17.1425	19.9048	18.0491	18.7712
slr2097	GlbN	Group 1 truncated hemoglobin GlbN	124	13.867	1	1	10.5	2	0	7.5437	-0.117586	0.0391416	19.2222	19.4945	17.4084	19.9798	17.3328	19.1652
slr0737	PsaD	Photosystem I reaction center subunit II	141	15.644	1	10	55.3	54	0	80.878	-0.120309	0.340778	29.0776	29.2058	28.7255	29.0982	29.0952	29.1764
sll1270	GlnH/glnP	Glutamine-binding periplasmic protein/glutamine transport system permease protein	530	57.68	1	1	2.8	2	0	8.5246	-0.12336	0.0492885	19.6189	19.4745	17.3823	18.2013	19.7981	18.8465
sll1579	CpcC2	Phycobilisome 32.1 kDa linker polypeptide, phycocyanin-associated, rod 2	273	30.797	1	15	51.3	84	0	148.53	-0.125014	0.178567	28.0062	28.7269	28.8057	28.772	28.5023	28.6395
slr0821	Slr0821	hypothetical protein	91	9.7249	1	1	9.9	5	0	2.9607	-0.126704	0.0380554	19.6272	19.1236	17.8654	17.9663	18.0299	21.0002
slr0877	GatA	Glutamyl-tRNA(Gln) amidotransferase subunit A	483	51.47	1	2	4.3	5	0	3.2253	-0.12886	0.0853771	19.276	19.0634	17.8262	18.2856	19.2137	19.0528
sll1735	Sll1735	Uncharacterized protein sll1735	133	14.105	1	5	53.4	17	0	42.957	-0.144242	0.291469	24.9587	25.2743	25.4303	25.606	25.1068	25.3832
slr0613	Slr0613	Slr0613 protein	173	18.297	1	1	5.8	5	0	2.5706	-0.145271	0.0818194	19.0122	19.0918	17.255	18.2319	18.7288	18.8341
sll1818	RpoA	DNA-directed RNA polymerase subunit alpha	314	35.003	1	6	19.4	25	0	29.554	-0.150611	0.562194	23.1143	22.9026	22.9046	22.9328	23.2288	23.2118
slr1665	DapF	Diaminopimelate epimerase	279	30.096	1	1	3.9	2	0	5.6828	-0.152365	0.0453182	19.487	19.1182	17.9628	17.38	20.9801	18.665
slr0808	RimM	Ribosome maturation factor RimM	185	20.715	1	4	16.2	15	0	17.323	-0.15634	0.244784	23.8379	23.5506	23.0802	23.657	23.4291	23.8517
slr0342	PetB	Cytochrome b6	222	25.054	1	1	5.4	1	0	6.7075	-0.160611	0.046374	19.2881	20.2938	17.3872	18.0728	20.7671	18.6111
slr1590	Slr1590	Slr1590 protein	295	32.604	1	2	6.8	2	0	7.0086	-0.16529	0.067527	19.1489	19.6879	17.1261	18.1879	19.3918	18.879
sll1443;chr1_232675	Sll1443	CTP synthetase;chr1_232675 Hypothetical protein [1892131 - 18904	546;556	60.807	2	1;1	1.5	0	0.0033003	1.7561	-0.165615	0.0693195	19.4036	19.093	17.8284	17.7266	20.0869	19.0083
slr1265	RpoC1	DNA-directed RNA polymerase subunit gamma	626	70.977	1	8	11.7	23	0	26.582	-0.170321	0.25548	28.6822	29.3151	28.5313	28.7918	29.0945	29.1533
slr1128	Slr1128	Uncharacterized protein slr1128	321	35.727	1	6	20.9	22	0	35.598	-0.173181	0.321101	22.5641	22.6619	22.5381	23.0206	22.935	22.3281
sll1163	Sll1163	Sll1163 protein	135	14.769	1	1	5.9	2	0.0095541	1.3707	-0.179164	0.0728073	19.3543	19.2496	17.5405	17.7666	19.9511	18.9643
sll0272	Sll0272	hypothetical protein	141	15.78	1	1	17	4	0	5.4577	-0.179784	0.0469553	19.6829	19.3201	17.5985	21.136	17.2022	18.8026
sll1824	Sll1824	50S ribosomal protein L25	118	13.442	1	5	42.4	15	0	11.845	-0.180335	0.5383	23.9189	23.7809	23.4531	23.8275	23.8652	24.0011
slr1471	YidC	Membrane protein insertase YidC	384	42.626	1	2	4.7	1	0	3.8031	-0.181625	0.0568608	19.2645	20.0244	17.4747	18.0161	20.6737	18.6186
sll1762	Sll1762	periplasmic protein, putative polar amino acid transport system	299	32.831	1	4	20.1	7	0	24.793	-0.182983	0.0636619	19.2999	19.9925	21.43	21.1415	21.2609	18.8689
slr1719	Slr1719	DrgA protein homolog	201	22.758	1	6	36.3	24	0	48.188	-0.184138	0.175118	23.3399	23.9557	24.6756	24.0273	24.3647	24.1316
sll0819	PsaF	Photosystem I reaction center subunit III	165	18.249	1	10	57.6	64	0	139.14	-0.185259	0.34443	28.9005	29.0484	28.3471	28.9707	28.831	29.05
sll0577	Sll0577	Sll0577 protein	169	17.839	1	1	8.9	2	0	8.661	-0.185431	0.0731403	19.0211	19.7729	17.107	18.2332	19.5868	18.6373
slr1624	Slr1624	Slr1624 protein	458	51.008	1	1	3.1	2	0	7.6512	-0.188185	0.0771765	19.0759	20.0325	17.3751	18.2902	19.32	19.4379
slr0606	Slr0606	Slr0606 protein	317	34.766	1	1	3.2	4	0	4.9535	-0.193165	0.0740733	19.2808	19.7143	17.5755	17.9337	20.1568	19.0596
slr1338	Slr1338	Slr1338 protein	200	22.438	1	1	4	4	0	2.0624	-0.193867	0.066257	19.3526	19.6008	17.6062	20.4257	17.641	19.0745
slr1834	Slr1834	P700 apoprotein subunit Ia	751	82.935	1	16	20.2	67	0	91.942	-0.197171	0.795586	28.2189	28.6081	28.4304	28.6457	28.5752	28.628
ssl1498	Ssl1498	Ssl1498 protein	61	6.3993	1	1	14.8	6	0	3.4392	-0.202314	0.0860894	19.4029	19.3369	17.5882	18.6769	18.1505	20.1075
sll0416	GroEL2	Chaperonin GroEL 2	552	57.774	1	33	67.6	138	0	267.99	-0.209209	1.22875	27.726	27.9903	27.8009	28.0194	28.0642	28.0612
ssr3451	PsbE	Cytochrome b559 subunit alpha	81	9.4485	1	2	25.9	12	0	33.29	-0.210728	0.72302	24.0161	24.168	24.0335	24.0906	24.2431	24.516
ssl0563	PsaC	Photosystem I iron-sulfur center	81	8.8282	1	6	65.4	20	0	36.326	-0.212381	0.572821	27.8946	28.174	27.8601	27.9258	28.3058	28.3342
slr1116	Slr1116	Slr1116 protein	173	20.103	1	2	9.8	7	0	6.1102	-0.21856	0.595715	22.1046	22.2232	21.782	22.172	22.1435	22.4499
sll1260	RpsB	30S ribosomal protein S2	269	30.15	1	11	29.7	42	0	44.266	-0.220455	0.286126	25.6528	25.833	24.881	25.5996	25.5413	25.8873
slr1992	Gpx2	Hydroperoxy fatty acid reductase Gpx2	154	16.646	1	3	22.7	3	0	7.813	-0.221754	0.052765	19.4444	19.2088	22.3038	21.8633	21.2931	18.4659
slr2072	IlvA	L-threonine dehydratase	508	56.545	1	7	18.3	33	0	37.984	-0.227681	0.359931	22.4876	22.3163	21.9822	22.5077	22.1036	22.858
slr1513	Slr1513	Membrane-associated protein slr1513	110	12.007	1	8	60.9	48	0	66.393	-0.228188	0.345093	27.0476	27.5569	27.4314	27.9227	27.6505	27.1472
slr1886	RsfS	Ribosomal silencing factor RsfS	154	17.09	1	1	5.2	3	0	2.2935	-0.23403	0.0789727	19.0598	19.1344	18.0905	18.4082	17.6532	20.9254
sll1812	RpsE	30S ribosomal protein S5	173	18.241	1	12	76.3	64	0	105.86	-0.239317	0.445913	26.7761	26.7275	26.2192	26.6755	26.6585	27.1068
sll1825	Sll1825	hypothetical protein	196	20.301	1	1	6.1	4	0	4.1866	-0.239989	0.0741915	19.946	19.8676	17.3362	18.0423	20.6189	19.2085
slr0058;chr1_114476	Slr0058	Slr0058 protein	142;148	16.485	2	1;1	7	3	0	3.708	-0.242254	0.138225	19.2835	19.4291	17.6373	18.5613	19.5847	18.9306
slr0435	AccB	Biotin carboxyl carrier protein of acetyl-CoA carboxylase	154	16.313	1	1	5.2	3	0	2.3404	-0.247142	0.0928622	19.3051	19.5034	17.5541	20.3442	17.8626	18.8973
sll1282	RibH	6,7-dimethyl-8-ribityllumazine synthase	164	17.617	1	3	19.5	11	0	5.4976	-0.248709	1.43599	22.9312	23.006	22.9761	23.1173	23.1703	23.3719
sll1796	PetJ	Cytochrome c6	120	12.463	1	1	7.5	3	0	10.176	-0.261775	0.124969	19.6475	18.9474	17.4561	18.1281	19.2564	19.4518
slr2076	GroEL1	Chaperonin GroEL 1	541	57.652	1	37	59	203	0	280.37	-0.262459	1.66196	28.5137	28.6159	28.3747	28.7977	28.7493	28.7446
slr1626	FolB	Probable dihydroneopterin aldolase	118	13.146	1	2	17.8	3	0	12.483	-0.267978	0.0754189	19.7272	19.72	17.7235	17.735	21.3237	18.916
slr2025	Slr2025	Slr2025 protein	153	16.888	1	1	7.8	4	0	6.2256	-0.269995	0.0965744	19.1876	19.6587	17.8102	17.8972	20.7296	18.8397
sll0629	Sll0629	alternative photosystem I reaction center subunit X	128	13.718	1	2	8.6	9	0	5.6763	-0.285212	0.0543117	22.1137	19.5192	21.3409	18.0004	23.0006	22.8285
sll0078	ThrS	Threonine--tRNA ligase	603	68.872	1	3	5.5	5	0	3.5568	-0.288495	0.0813352	19.4524	19.2673	17.6189	18.4909	17.5014	21.2119
sll1769	Sll1769	Thylakoid protein sll1769	105	11.558	1	1	8.6	4	0	2.5603	-0.306359	0.130144	18.6977	19.6182	17.6913	18.1734	20.2891	18.4638
ssl0242	Ssl0242	Ssl0242 protein	78	8.9765	1	1	14.1	2	0	2.3506	-0.31031	0.0948483	18.966	19.9673	17.6559	17.8645	21.0412	18.6144
sll1810	RplF	50S ribosomal protein L6	179	19.666	1	9	57.5	49	0	122.36	-0.310439	0.817717	25.4304	25.3838	25.1005	25.403	25.5571	25.8859
sll1804	RpsC	30S ribosomal protein S3	240	27.147	1	15	63.8	66	0	73.177	-0.313958	0.701367	26.0665	25.9433	25.4919	26.1095	25.987	26.3471
sll1130	Sll1130	Sll1130 protein	115	12.933	1	5	49.6	27	0	21.224	-0.318038	0.320928	23.4791	23.5237	24.2677	24.5156	24.2465	23.4626
sll1806	RplN	50S ribosomal protein L14	122	13.294	1	8	53.3	42	0	41.152	-0.32585	0.357859	25.6388	25.2848	24.5457	25.3166	25.2492	25.8811
slr0676	CysC	Probable adenylyl-sulfate kinase	177	19.674	1	2	10.7	2	0.0065359	1.6201	-0.329622	0.107558	19.0369	19.8262	17.148	20.0641	17.5035	19.4324
slr1678	RplU	50S ribosomal protein L21	124	13.669	1	10	69.4	43	0	123.32	-0.331519	0.400144	26.7385	26.3656	25.8702	26.321	26.516	27.1318
slr1124	Slr1124	phosphoglycerate mutase	443	49.344	1	4	11.3	11	0	19.706	-0.350134	0.120312	19.2487	19.6223	21.5856	21.0748	21.4642	18.968
slr0447	AmiC	Negative aliphatic amidase regulator	446	48.359	1	5	18.8	23	0	55.446	-0.354066	0.332221	23.6244	23.3585	23.6603	24.5966	23.9896	23.1191
slr1051;chr1_22344	FabI	Enoyl-[acyl-carrier-protein] reductase [NADH] FabI	258;315	27.625	2	2;2	8.9	7	0	5.1842	-0.356517	0.0812362	19.0763	20.1611	17.1209	21.5215	17.1837	18.7225
slr0628	RpsN	30S ribosomal protein S14	100	11.854	1	3	25	10	0	5.2486	-0.361235	0.67148	23.0458	23.2545	22.7184	23.0199	23.4179	23.6645
slr1884	TrpS	Tryptophan--tRNA ligase	337	37.763	1	14	33.5	69	0	90.512	-0.369681	0.320427	26.9001	27.1325	25.7891	26.6634	26.8473	27.42
sll0480	DapL	LL-diaminopimelate aminotransferase	412	45.087	1	8	23.3	17	0	31.178	-0.383818	0.0720846	19.3121	19.9564	23.5573	22.7198	22.5658	18.6916
sll0822	Sll0822	Sll0822 protein	129	13.962	1	2	24.8	9	0	9.2813	-0.389422	1.16201	21.2339	21.6139	21.69	21.7787	21.9057	22.0217
slr1512	Slr1512	Slr1512 protein	374	39.647	1	6	14.7	23	0	59.477	-0.391115	0.259232	23.5055	23.8704	24.2145	24.8947	24.7406	23.1285
sll1931	GlyA	Serine hydroxymethyltransferase	427	46.259	1	8	22.7	17	0	22.642	-0.394342	0.0856069	19.7161	19.6832	23.2103	22.72	22.0547	19.0178
slr0925	Ssb	Single-stranded DNA-binding protein 1	121	13.656	1	2	16.5	6	0	4.3795	-0.403158	0.10339	19.5863	19.4909	17.5653	18.4775	17.6575	21.7169
slr1140	Slr1140	3-amino-5-hydroxybenzoic acid synthase	378	41.559	1	11	38.6	43	0	98.621	-0.403517	0.257391	25.0564	25.0191	23.7613	24.8699	24.3095	25.868
slr0650	Slr0650	Slr0650 protein	201	22.501	1	8	31.3	27	0	25.218	-0.406014	0.590056	24.4788	24.4546	23.7272	24.4414	24.444	24.9932
slr0809	RfbB	UDP-glucuronate decarboxylase	328	36.942	1	1	2.4	3	0	3.3173	-0.41177	0.15443	18.9634	19.6234	17.7595	17.841	20.7163	19.0243
sll1932;chr1_290236	DnaK3	Chaperone protein dnaK3	771;794	86.029	2	1;1	1.9	7	0	2.4073	-0.415461	0.0896544	19.6095	19.8104	17.6474	18.5621	17.3955	22.3562
sll1740	RplS	50S ribosomal protein L19	122	13.786	1	6	45.1	31	0	25.687	-0.420642	1.03815	25.5072	25.3458	25.0496	25.6624	25.5226	25.9795
ssl0601	RpsU	30S ribosomal protein S21	60	7.3414	1	6	60	17	0	31.847	-0.42651	0.744609	24.4347	24.5446	24.0169	24.4464	24.6765	25.1529
sll1096	RpsL	30S ribosomal protein S12	126	14.176	1	6	48.4	28	0	90.726	-0.428009	0.856413	26.1869	26.6722	25.9721	26.5066	26.7437	26.865
sll1811	RplR	50S ribosomal protein L18	120	13.204	1	5	39.2	30	0	88.753	-0.428667	0.715326	26.3487	26.2239	25.8876	26.148	26.6352	26.963
sll1244	RplI	50S ribosomal protein L9	152	16.641	1	7	46.7	36	0	71.523	-0.429722	1.59332	26.2033	26.0467	26.0992	26.3817	26.4894	26.7672
ssl2296	Ssl2296	Putative pterin-4-alpha-carbinolamine dehydratase	96	10.734	1	4	77.1	41	0	157.73	-0.430882	0.413765	28.6009	28.4599	27.7129	28.4209	28.2688	29.3766
ssr1604	RpmB	50S ribosomal protein L28	78	8.9934	1	8	56.4	19	0	21.024	-0.433404	0.7127	24.0985	23.957	23.3391	24.2149	23.9788	24.5012
slr1356	Rps1A	30S ribosomal protein S1 homolog A	328	36.57	1	11	25.6	56	0	56.701	-0.437206	0.778041	25.6175	25.7602	25.1356	25.7785	25.7508	26.2956
sll1808	Sll1808	50S ribosomal protein L5	200	22.508	1	13	59	66	0	70.92	-0.447055	0.578427	27.089	26.8514	26.2073	26.9147	26.9687	27.6055
sll0518	Sll0518	Sll0518 protein	385	43.118	1	11	28.6	36	0	50.88	-0.454112	0.421873	24.7838	25.0747	23.7924	24.669	24.8624	25.4818
sll1785	Sll1785	Sll1785 protein	268	30.011	1	4	18.7	8	0	11.814	-0.466195	0.184347	19.4053	20.0234	21.4069	21.5068	21.506	19.2214
sll1744	RplA	50S ribosomal protein L1	238	25.852	1	19	71.8	120	0	262.24	-0.47993	0.853322	28.5305	28.2577	27.8578	28.4321	28.6307	29.023
sll0395	Sll0395	Sll0395 protein	212	23.752	1	10	40.6	38	0	41.106	-0.485704	1.0507	24.2482	24.5307	24.8232	24.7846	25.0055	25.2691
slr0559	NatB	Periplasmic binding protein of ABC transporter for natural amino acids	454	46.672	1	3	12.1	9	0	19.788	-0.491434	0.155089	19.3393	19.632	21.7357	21.3259	21.9233	18.9321
sll1307;chr1_264450	Sll1307	Sll1307 protein	175;190	17.849	2	2;2	17.1	3	0	3.582	-0.499354	0.139099	19.3394	19.4494	17.4214	21.3382	17.3643	19.0058
slr1102	Slr1102	Slr1102 protein	853	96.638	1	33	36.9	142	0	224.19	-0.504447	0.893359	27.4416	27.4402	26.8351	27.5382	27.6137	28.0784
ssr1853	Ssr1853	Ssr1853 protein	95	10.902	1	4	53.7	30	0	57.792	-0.513547	0.650389	24.1533	24.4983	23.8946	24.306	24.47	25.3108
sll0521	NdhG	NAD(P)H-quinone oxidoreductase chain 6	198	21.522	1	1	6.1	5	0	4.5347	-0.52262	0.190774	19.2116	18.8809	17.4457	18.1535	18.1209	20.8317
sll1967	Sll1967	Uncharacterized RNA methyltransferase sll1967	463	51.522	1	9	21.6	41	0	37.815	-0.545719	0.756156	24.3786	24.1532	23.5158	24.2701	24.4499	24.9647
sll1813	RplO	50S ribosomal protein L15	147	15.194	1	7	57.1	39	0	87.064	-0.558258	1.59043	25.0872	25.2328	24.8516	25.6131	25.4146	25.8187
slr0163;chr1_98110	Slr0163	a part of pilC, pilin biogenesis protein, required for twitching	247;301	26.764	2	1;1	2.8	5	0.0079872	1.3906	-0.558905	0.0851138	19.8357	19.9369	17.4719	17.7294	17.195	23.9968
ssl2084	AcpP	Acyl carrier protein	77	8.5895	1	2	20.8	14	0	10.428	-0.580608	0.0649036	24.5216	24.7535	17.1114	25.1223	23.9193	19.0867
slr0376	Slr0376	Slr0376 protein	116	12.857	1	7	51.7	35	0	96.598	-0.585623	1.09017	25.62	25.3064	24.8084	25.7509	25.7323	26.0085
ssl3436	RpmC	50S ribosomal protein L29	73	8.5455	1	10	94.5	50	0	123.53	-0.587814	1.2984	27.0633	26.687	26.71	27.2278	27.2407	27.7553
sll1821	RplM	50S ribosomal protein L13	151	16.99	1	10	77.5	59	0	102.34	-0.589391	1.20272	27.3392	26.9591	26.7823	27.4488	27.4609	27.939
sll0158	GlgB	1,4-alpha-glucan branching enzyme GlgB	770	89.526	1	20	31.8	80	0	121.3	-0.590087	1.4567	26.5793	26.6983	26.1504	26.9136	27.0671	27.2175
slr1870	Slr1870	Slr1870 protein	249	27.693	1	6	28.5	23	0	32.3	-0.62938	0.586109	24.3081	24.7583	23.5116	24.5712	24.4543	25.4407
sll1807	Sll1807	50S ribosomal protein L24	105	11.707	1	9	72.4	53	0	97.59	-0.677943	0.959752	26.7283	26.8465	25.918	26.966	27.0809	27.4798
sll1626	LexA	Transcription regulator LexA	203	22.744	1	2	8.4	3	0	5.2303	-0.686119	0.261957	19.165	19.3622	17.7281	17.9092	21.053	19.3514
slr1784	BvdR	Biliverdin reductase	328	36.64	1	7	26.2	26	0	33.526	-0.692603	0.926035	23.6697	22.8303	23.0417	23.46	23.8611	24.2984
sll1043	Pnp	Polyribonucleotide nucleotidyltransferase	718	77.83	1	38	54	171	0	244.39	-0.693752	1.44962	27.5185	27.6197	26.9714	27.9842	27.9554	28.2513
sll1803	RplV	50S ribosomal protein L22	121	13.502	1	6	64.5	18	0	40.874	-0.695759	1.08673	25.1586	24.8287	24.3624	25.2102	25.3734	25.8533
sll0767	RplT	50S ribosomal protein L20	117	13.553	1	5	36.8	31	0	65.735	-0.700047	1.44308	26.6886	26.4139	26.2041	26.8051	27.1932	27.4084
slr0434	Efp	Elongation factor P	187	20.406	1	4	23	26	0	19.045	-0.705016	2.26762	24.5458	24.2981	24.2079	25.1226	24.8969	25.1474
sll1101	RpsJ	30S ribosomal protein S10	105	12.037	1	10	72.4	35	0	58.161	-0.709396	1.40877	25.4792	25.6488	25.103	25.7962	26.1888	26.3742
sll1802	RplB	50S ribosomal protein L2	276	30.433	1	17	48.6	96	0	108	-0.716412	1.05908	27.8121	27.5836	27.0523	27.8714	28.0971	28.6287
ssl1426	RpmI	50S ribosomal protein L35	67	7.8913	1	1	19.4	5	0	4.8408	-0.730572	0.152378	19.6984	19.4324	17.5996	18.4397	17.5533	22.9292
slr2023	FabD	Malonyl CoA-acyl carrier protein transacylase	293	31.49	1	3	9.6	3	0	5.2151	-0.750726	0.306648	18.8822	18.9118	17.6124	20.9133	17.8404	18.9048
sll1799	RplC	50S ribosomal protein L3	213	22.741	1	14	51.6	92	0	135.58	-0.758358	1.46935	27.3361	27.1263	26.718	27.5901	27.7483	28.1172
sll1809	RpsH	30S ribosomal protein S8	133	14.666	1	13	88.7	130	0	148.38	-0.764884	1.12536	29.7627	29.1237	28.8609	29.728	29.9836	30.3304
ssl3432	RpsS	30S ribosomal protein S19	92	10.29	1	5	57.6	47	0	46.564	-0.76601	0.882308	27.3476	26.7699	26.1357	27.258	27.3766	27.9166
sll1801	RplW	50S ribosomal protein L23	101	11.526	1	9	80.2	56	0	65.652	-0.790904	1.70805	26.7934	26.5035	26.1732	27.2548	27.1066	27.4815
ssr0482	RpsP	30S ribosomal protein S16	82	9.5561	1	8	78	69	0	53.039	-0.811518	1.2478	28.4371	27.8674	27.7301	28.4651	28.7946	29.2095
sll0596	Sll0596	Sll0596 protein	244	26.325	1	9	52.9	34	0	47.566	-0.81654	0.996107	25.7424	25.7518	24.7213	25.8796	26.3228	26.4626
sll1800	RplD	50S ribosomal protein L4	210	23.356	1	9	43.8	44	0	122.53	-0.825457	1.50041	27.5824	27.2746	26.8891	27.914	27.9208	28.3877
slr0469	RpsD	30S ribosomal protein S4	202	23.183	1	21	72.8	127	0	171.56	-0.836074	1.41475	28.5204	28.1032	27.9969	28.6328	29.0913	29.4046
ssl1784	RpsO	30S ribosomal protein S15	89	10.373	1	8	69.7	68	0	84.067	-0.839825	1.20287	29.0499	28.5973	28.1596	29.1608	29.3268	29.8387
ssr1399	RpsR	30S ribosomal protein S18	71	8.3808	1	10	71.8	51	0	38.752	-0.858594	1.68715	28.6231	28.2732	28.0924	29.0294	29.0059	29.5292
ssl3437	RpsQ	30S ribosomal protein S17	81	9.2887	1	13	74.1	110	0	207.05	-0.882423	0.931258	29.3611	28.7581	27.9765	29.2936	29.5134	29.9359
sll1767	RpsF	30S ribosomal protein S6	113	13.237	1	9	62.8	60	0	130.43	-0.89032	1.13967	28.6637	27.9954	27.5727	28.6702	28.9265	29.306
sll1097	RpsG	30S ribosomal protein S7	156	17.384	1	10	71.8	92	0	108.93	-0.896576	1.01292	28.4217	27.9029	27.4828	28.3707	28.6936	29.4328
sll1665	Sll1665	Sll1665 protein	589	63.607	1	4	7.8	12	0	24.866	-0.905113	0.31653	23.3213	19.5852	22.7978	22.6778	22.9388	22.8029
sll1817	RpsK	30S ribosomal protein S11	130	13.762	1	10	60.8	56	0	111.15	-0.905547	1.15216	26.6995	26.1919	25.7754	26.697	27.1057	27.5808
sll1822	RpsI	30S ribosomal protein S9	137	15.086	1	13	81.8	62	0	220.88	-0.935644	2.83447	27.3043	27.2077	27.0278	27.9496	28.2525	28.1447
sll1816	RpsM	30S ribosomal protein S13	127	14.572	1	20	82.7	103	0	146.58	-0.948586	1.45774	28.3674	27.752	27.6812	28.5091	28.9044	29.2329
ssl2233	RpsT	30S ribosomal protein S20	97	10.702	1	7	48.5	56	0	109.53	-0.954907	1.61609	26.5245	26.4868	25.8376	27.015	27.1676	27.531
slr1122	Slr1122	Slr1122 protein	250	28.176	1	3	11.6	7	0	16.141	-0.989123	0.281401	19.0393	19.3631	16.9739	18.0017	21.8324	18.5095
slr1615	RfbE	Perosamine synthetase	378	41.944	1	2	4	7	0	3.535	-1.03674	0.987488	19.2864	20.7003	19.8991	20.9054	20.5789	21.5118
sll0098	RlmN	Probable dual-specificity RNA methyltransferase RlmN	350	38.856	1	2	6.3	5	0	3.7924	-1.08181	0.306334	19.4907	19.6064	17.5687	21.2336	17.4144	21.2632
slr1847	Slr1847	Nucleoid-associated protein slr1847	114	12.135	1	5	46.5	14	0	14.443	-1.20211	0.386693	19.3063	23.2216	23.2422	23.0867	23.2134	23.0763
sll1021	Sll1021	Flotillin family inner membrane protein sll1021	673	74.423	1	36	49.2	123	0	323.31	-1.26507	0.536334	26.7689	26.3193	26.1522	28.1992	29.1334	25.7029
ssr0390;chr1_7007	PsaK1	Photosystem I reaction center subunit PsaK 1	86;95	8.6442	2	1;1	19.8	6	0	19.092	-1.38569	0.220236	19.0201	19.6752	17.6805	18.1745	17.4375	24.9208
ssl2598	PsbH	Photosystem II reaction center protein H	64	7.1164	1	1	21.9	12	0	7.4239	-1.45585	0.340068	24.2183	19.1034	24.5862	24.039	24.0494	24.1871
chr1_280681	Chr1_280681	Hypothetical protein [811257 - 810925]	111	12.88	1	1	6.3	5	0.0033278	1.8018	-1.8438	0.278186	19.2988	18.9277	17.7794	18.0686	17.7106	25.7581
sml0008	PsaJ	Photosystem I reaction center subunit IX	40	4.5324	1	1	22.5	6	0	4.1913	-2.10454	0.261401	19.145	19.766	17.3868	17.4456	18.0467	27.1191
slr0036	AspC	Aminotransferase	389	42.455	1	1	1.8	6	0	5.5856	-2.34209	0.271236	19.6457	19.3451	18.1689	18.1758	17.7596	28.2507
slr0321	Era	GTPase Era	315	34.791	1	3	12.4	10	0	4.3746	-3.17502	0.996763	22.3677	19.9437	17.2578	22.9878	22.6522	23.4543
sll0754	RbfA	Ribosome-binding factor A	133	14.749	1	3	27.8	9	0	12.294	-3.33689	2.41826	18.9837	19.5032	17.6728	22.1519	21.8583	22.1603
sfGFPFLAG	sfGFP-3xFLAG	sfGFP-3xFLAG fusion protein	241;249	27.187	2	26;11	81.3	168	0	323.31	-13.3089	3.61635	19.3196	19.7912	22.7272	33.8933	33.7428	34.1286

## Sheet: Table S8
Supporting Table S8 - List of identified proteins from Student's t-test: Slr1079-3xFLAG and control Co-IP
Protein identity					Protein identification						Student's t-test		Label-free protein quantification (Log2 LFQ intensities; imputed values in italic)
Protein IDs	Protein name	Protein description	Sequence lengths	Mol. weight [kDa]	Number of proteins	Peptide counts	Sequence coverage [%]	MS2 counts	Q-value	Score	Log2 t-test Difference (Slr1079 IP/sfGFP IP)	-Log10 t-test p-value	Slr1079 IP Replicate 1	Slr1079 IP Replicate 2	Slr1079 IP Replicate 3	sfGFP IP Replicate 1	sfGFP IP Replicate 2	sfGFP IP Replicate 3
slr1079-3xFLAG	Slr1079-3xFLAG	Slr1079-3xFLAG fusion protein	168	19.575	1	1	49.4	59	0	300.14	12.1242	5.37297	32.0744	32.4372	32.0496	19.7803	19.6896	20.7185
chr1_16981; chr1_17047	Slr1079S	Hypothetical protein Slr1079S [383370 - 383753]	128;100	14.686	2	15;2	64.8	69	0	323.31	6.72353	1.15378	31.7378	32.3617	32.4021	29.5316	20.2601	26.5392
smr0005	PsaM	Photosystem I reaction center subunit XII	31	3.38	1	2	100	8	0	36.611	4.78854	0.779176	27.7979	19.2112	27.5219	19.9239	19.614	20.6276
slr0043	CmpC	Bicarbonate transport ATP-binding protein CmpC	667	74.096	1	10	16.6	20	0	99.276	4.50407	3.1743	24.7144	24.4365	24.8918	19.8373	19.6206	21.0726
sml0008	PsaJ	Photosystem I reaction center subunit IX	40	4.5324	1	2	87.5	7	0	15.603	4.14891	0.654903	18.4641	26.7354	27.3089	19.7464	19.8417	20.4736
sll0017	HemL	Glutamate-1-semialdehyde 2,1-aminomutase	433	45.891	1	6	17.8	11	0	46.697	3.65556	3.07561	24.0043	23.9345	24.0211	20.4425	19.5808	20.9699
slr2018	Slr2018	Slr2018 pilin operon protein	799	84.853	1	14	25.7	33	0	254.11	3.63827	3.08919	26.3607	27.0505	27.4526	23.7674	22.9367	23.2449
slr0044	CmpD	Bicarbonate transport ATP-binding protein CmpD	282	31.34	1	5	17.4	8	0	42.752	3.50436	3.52961	23.4705	23.1886	23.6152	19.9142	19.457	20.3899
slr0536	HemE	Uroporphyrinogen decarboxylase	350	39.152	1	4	14.6	13	0	36.453	3.43619	4.03481	23.7984	23.7123	23.6442	19.9899	20.1621	20.6942
sll1435	Sll1435	glutamyl-tRNA(Gln) amidotransferase subunit B	519	57.605	1	5	10.4	12	0	50.472	3.23262	4.0803	23.3676	23.1704	22.8198	20.018	19.653	19.9889
slr0442	Slr0442	minor pilin PilX2	611	62.907	1	4	8.7	9	0	33.959	2.81937	3.15706	23.4192	23.2995	22.8604	20.2651	20.0143	20.8416
sll7086	Sll7086	CRISPR3 type III-Bv system Cmr5 protein	131	14.549	1	2	16	6	0	30.317	2.79087	3.06766	22.9113	23.1632	23.2274	20.1142	19.9238	20.8912
sll1908	Sll1908	D-3-phosphoglycerate dehydrogenase	526	56.211	1	9	19.2	14	0	74.677	2.60169	0.905321	24.4663	24.0736	23.9332	19.9107	24.192	20.5654
sll1499	Sll1499	ferredoxin-dependent glutamate synthase	1546	168.35	1	7	6.6	14	0	53.008	2.60059	3.1532	22.8066	23.1203	22.9146	19.8271	20.6071	20.6055
slr0552	Slr0552	Slr0552 protein	244	26.721	1	5	20.9	11	0	40.728	2.58791	3.26987	22.9508	22.9079	22.5737	20.192	19.8472	20.6294
slr1720	AspS	Aspartate--tRNA(Asp/Asn) ligase	599	67.209	1	5	9.7	7	0	35.822	2.58609	2.85951	22.9256	22.4718	22.3636	19.4851	20.0794	20.4383
slr0924;chr1_123830	Slr0924	periplasmic protein, function unknown;chr1_123830 Hypothetical protein [2798553 - 2799470]	242;306	26.113	2	4;4	25.2	15	0	64.357	2.57972	0.869336	24.2419	24.6118	24.2649	24.4658	19.8913	21.0224
slr0670	Slr0670	Slr0670 protein	291	32.676	1	2	8.6	6	0	19.099	2.54398	2.78492	22.7302	22.8593	22.3473	19.6428	19.9979	20.6641
sll1091	ChlP	Geranylgeranyl diphosphate reductase	407	44.882	1	10	23.8	24	0	75.246	2.46195	1.10798	25.171	24.4303	23.9477	23.0992	22.9732	20.0908
slr1330	AtpC	ATP synthase epsilon chain	136	14.58	1	3	45.6	9	0	60.38	2.44931	0.629064	23.8818	19.0823	24.5878	20.0293	19.5907	20.5839
sll1981	IlvB	Acetolactate synthase	550	60.173	1	5	10.9	9	0	34.865	2.43792	3.17922	22.5746	22.4331	22.6672	19.7293	20.06	20.5717
slr1992	Gpx2	Hydroperoxy fatty acid reductase Gpx2	154	16.646	1	3	22.7	4	0	22.097	2.42097	1.65686	22.3549	23.9396	22.2415	20.5647	19.711	20.9974
sll0230	Sll0230	hypothetical protein	101	10.944	1	3	26.7	12	0	22.974	2.38721	1.14029	23.5083	23.4947	23.5011	23.0789	20.0186	20.245
slr1619	Slr1619	Rhamnosyl O-methyltransferase	249	27.752	1	3	11.2	6	0	20.066	2.26441	2.66271	22.2554	22.6114	22.0967	19.7671	19.7771	20.6261
sll0179	GltX	Glutamate--tRNA ligase	483	54.008	1	5	12.2	9	0	42.375	2.21312	2.06159	22.746	22.6037	22.0313	19.8827	19.8001	21.059
slr1780	Slr1780	hypothetical protein YCF54	106	12.184	1	2	15.1	7	0	15.26	2.18559	0.990806	23.2968	23.2265	23.223	23.1081	19.7729	20.3086
slr1349	Pgi	Glucose-6-phosphate isomerase	531	58.356	1	8	14.7	17	0	72.014	2.17648	1.07029	23.7598	23.3044	23.0903	22.969	19.7813	20.8748
slr2032	Ycf23	Ycf23 protein	248	25.366	1	3	16.5	10	0	45.626	2.16842	2.58699	23.5927	23.949	23.663	21.7664	21.9655	20.9674
slr0876	Slr0876	Slr0876 protein	409	45.252	1	5	12.7	10	0	33.242	2.15004	2.26208	22.7177	22.6906	22.5843	20.3659	19.9222	21.2544
sll1098	FusB	Elongation factor G 2	691	75.43	1	4	5.2	7	0	26.687	2.10035	2.02912	22.4853	22.1848	21.9925	20.1687	19.3634	20.8294
sll1027	GltD	NADH-glutamate synthase small subunit	494	54.144	1	5	10.9	10	0	29.773	2.01668	2.284	22.3662	22.2905	21.9167	19.8965	19.7823	20.8445
sll0180	Sll0180	Sll0180 protein	501	53.966	1	5	11.2	11	0	39.65	1.93642	1.08521	23.2731	22.7404	22.298	22.4021	19.8807	20.2194
sll0807	Rpe	Ribulose-phosphate 3-epimerase	230	24.971	1	6	30.9	17	0	59.326	1.93075	0.770557	25.0657	25.1361	24.3113	24.1303	23.9272	20.6634
ssr2998	Ssr2998	Ssr2998 protein	65	7.2203	1	6	69.2	18	0	54.953	1.89481	0.598571	25.0318	25.3697	24.9988	24.9481	24.3296	20.438
sll1425;chr1_246784	ProS	Proline--tRNA ligase	603;618	66.929	2	4;4	7.3	7	0	31.386	1.88527	2.11817	22.1457	21.7647	21.7712	20.0073	19.3903	20.6281
sll1316	PetC2	Cytochrome b6-f complex iron-sulfur subunit 2	180	18.996	1	6	33.3	27	0	62.693	1.86877	0.601382	25.6088	25.7104	25.0602	24.9542	24.9812	20.8377
slr1622	Ppa	Inorganic pyrophosphatase	169	19.088	1	5	34.3	14	0	63.983	1.85613	0.56463	25.491	25.973	24.7315	25.0694	24.8414	20.7164
slr1251	Slr1251	peptidyl-prolyl cis-trans isomerase	170	18.404	1	6	34.1	14	0	65.617	1.84804	0.701303	24.2116	25.4339	25.0076	24.5918	23.7191	20.798
sll0402	AspC	Aspartate aminotransferase	389	42.352	1	7	17	10	0	47.532	1.84685	1.30661	22.9565	22.7265	22.1563	19.9292	21.9724	20.3972
sll1261	Tsf	Elongation factor Ts	218	24.231	1	8	43.1	24	0	73.171	1.84287	0.600151	24.8547	25.1969	24.9862	24.8283	24.2314	20.4496
sll1239	Sll1239	Sll1239 protein	178	20.608	1	2	11.2	5	0	11.472	1.83867	1.77282	21.8495	21.812	22.1317	19.9189	19.4057	20.9526
sll1638	Sll1638	Sll1638 protein	149	16.477	1	5	40.3	5	0	47.847	1.8235	0.58017	24.7121	25.237	25.0912	24.605	24.5589	20.4058
sll1931	GlyA	Serine hydroxymethyltransferase	427	46.259	1	11	30.9	23	0	80.664	1.82114	0.894025	24.1424	24.328	24.3005	23.6385	23.1038	20.5652
sll0830;chr1_190785	Sll0830	Elongation factor G-like protein	669;676	73.369	2	5;5	7.3	9	0	30.445	1.77029	1.36058	22.7629	22.489	22.4916	21.9636	19.9388	20.5302
chr1_11522;slr1793	Chr1_11522	Hypothetical protein [260445 - 261635];slr1793 transaldolase	397;378	43.719	2	14;13	31	41	0	111.86	1.75609	1.15552	26.0176	25.7998	25.5758	24.8588	24.6243	22.6418
sll0173	Sll0173	Virginiamycin B lyase	352	38.545	1	4	13.6	6	0	24.854	1.75179	3.22071	21.9492	22.1434	21.7853	20.0811	20.0443	20.497
slr1351	Slr1351	UDP-N-acetylmuramoylalanyl-D-glutamyl-2 6-diaminopimelate--D-alanyl-D-alanine ligase	454	48.239	1	2	4	5	0	13.173	1.7432	1.6894	21.2351	21.5898	21.7717	19.6578	19.0991	20.6101
sll1479	Pgl	6-phosphogluconolactonase	240	26.482	1	3	17.1	11	0	21.695	1.73929	2.26086	22.0736	22.3211	22.1614	19.9225	20.4188	20.9968
sll1212	RfbD	GDP-mannose 4,6-dehydratase	362	41.333	1	10	29.8	28	0	80.935	1.72924	0.753014	24.4234	24.5658	24.4388	24.2135	23.3251	20.7016
sll1743	RplK	50S ribosomal protein L11	141	14.977	1	5	35.5	13	0	36.583	1.71188	0.583606	24.4629	24.051	24.1691	23.9842	19.9179	23.6454
sll1852	Ndk	Nucleoside diphosphate kinase	149	16.692	1	6	48.3	29	0	46.652	1.70508	0.886062	23.9007	24.5095	24.201	23.6991	23.0113	20.7856
slr0244	Slr0244	Slr0244 protein	284	31.204	1	6	25	10	0	49.841	1.70072	0.858219	23.7236	23.1874	23.2175	22.7555	19.8783	22.3925
slr0148	Slr0148	hypothetical protein	160	17.823	1	4	26.2	8	0	31.235	1.6986	1.64817	22.7689	23.7057	23.7609	22.3902	21.4661	21.2834
slr0165	ClpP3	Probable ATP-dependent Clp protease proteolytic subunit 3	202	22.397	1	8	36.6	14	0	61.519	1.69489	0.92383	23.4131	24.1641	23.9348	23.2565	22.6462	20.5246
slr1516	SodB	Superoxide dismutase [Fe]	199	21.677	1	6	50.3	21	0	89.851	1.69229	1.30038	26.8471	27.6424	26.8883	26.3525	25.5052	24.4432
slr0036	AspC	Aminotransferase	389	42.455	1	1	1.8	6	0	10.242	1.69084	0.239594	18.5954	19.3368	27.2004	20.2873	19.2504	20.5224
slr1944	Slr1944	Slr1944 protein	538	58.685	1	3	5.2	4	0	20.013	1.68871	2.04294	22.0841	21.9444	21.808	20.002	19.8242	20.9441
sll0370	Sll0370	carbamoyl-phosphate synthase, pyrimidine-specific, large chain	1105	121.62	1	5	3.9	10	0	32.862	1.68471	1.02798	22.8222	22.4401	22.3071	19.8175	22.3097	20.388
ssl2084	AcpP	Acyl carrier protein	77	8.5895	1	2	20.8	16	0	20.859	1.68009	0.504439	25.4196	26.0084	25.6989	25.9991	24.8792	21.2084
ssl2781	Ssl2781	Ssl2781 protein	82	9.655	1	3	35.4	6	0	19.387	1.66804	1.09748	22.1153	22.683	22.3155	22.0426	19.7114	20.3557
sll0006	AspC	Aspartate aminotransferase	394	43.979	1	4	11.9	10	0	29.834	1.64784	3.44988	22.0069	21.6994	21.7118	19.9455	20.2556	20.2735
sll1336	Sll1336	Sll1336 protein	705	78.327	1	6	9.8	8	0	45.721	1.64743	0.570254	23.02	19.1778	22.6416	19.9893	19.2704	20.6374
sll0329	Gnd	6-phosphogluconate dehydrogenase, decarboxylating	482	52.873	1	8	23.7	24	0	77.935	1.64723	1.62692	25.7801	25.4216	25.5312	24.4543	24.3033	23.0336
sll0408	Sll0408	peptidyl-prolyl cis-trans isomerase	402	43.909	1	9	22.1	23	0	66.01	1.64635	0.7338	23.817	24.3735	23.7912	23.526	23.1803	20.3365
sll1502	GltB	Ferredoxin-dependent glutamate synthase 1	1550	169.07	1	10	7.7	18	0	81.814	1.63737	1.4512	23.3331	23.0969	23.3406	22.1138	22.1608	20.5839
slr1410	Slr1410	Uncharacterized WD repeat-containing protein slr1410	334	35.989	1	4	12	8	0	25.564	1.63727	0.945688	22.6076	22.7582	22.5709	22.5534	19.826	20.6455
slr1517	LeuB	3-isopropylmalate dehydrogenase	362	38.667	1	4	11.3	9	0	30.544	1.63135	0.976824	22.5798	22.3749	21.7635	21.8732	19.2998	20.6512
sll0726	Pgm	Phosphoglucomutase	567	61.124	1	7	13.8	24	0	65.08	1.57668	1.0966	23.797	23.8616	23.8127	23.2804	22.485	20.976
sll0041	PixJ1	Photoreceptor for positive phototaxis PixJ1	1000	108.33	1	9	9.7	17	0	67.697	1.57342	1.02981	22.8539	22.4475	22.5141	22.2897	19.8461	20.9595
slr0040	CmpA	Bicarbonate-binding protein CmpA	452	49.46	1	17	45.4	91	0	248.92	1.55225	1.87444	28.9702	29.0807	28.6274	27.658	27.7035	26.66
sll5034	Sll5034	Sll5034 protein	207	23.2	1	4	20.3	11	0	31.818	1.5351	0.558546	22.4673	18.9599	22.4583	19.4328	19.3885	20.4588
chr1_143957;slr0549	Chr1_143957	Hypothetical protein [3248307 - 3249323];slr0549 aspartate beta-semialdehyde dehydrogenese	339;269	36.694	2	7;4	24.8	13	0	45.675	1.50895	0.889225	23.8576	23.7562	23.5917	23.15	22.8682	20.6605
slr0543	TrpB	Tryptophan synthase beta chain	412	45.07	1	2	5.8	6	0	16.97	1.49746	1.23566	22.2431	22.0683	22.2913	21.6953	19.7383	20.6768
sll0078	ThrS	Threonine--tRNA ligase	603	68.872	1	6	10.9	9	0	42.663	1.48626	2.33409	22.1293	21.7806	21.9125	20.0576	20.4213	20.8847
slr0708	Slr0708	Slr0708 protein	402	44.68	1	5	18.9	15	0	42.746	1.48295	1.35263	22.5357	21.9758	21.8367	19.8413	21.4542	20.6038
slr0426	FolE	GTP cyclohydrolase 1	234	26.639	1	6	40.2	14	0	42.633	1.4754	1.03661	23.6165	23.1695	23.5818	22.6179	22.6487	20.6749
slr0597	Slr0597	phosphoribosyl aminoimidazole carboxy formyl formyltransferase/inosinemonophosphate cyclohydrolase (PUR-H(J))	553	59.326	1	10	22.6	27	0	83.465	1.47363	0.764977	24.2032	24.2777	23.9952	23.6989	23.4293	20.9269
sml0007	PsbY	Photosystem II protein Y	39	4.2019	1	3	89.7	7	0	45.52	1.47028	0.412753	25.1872	25.1564	25.1492	25.2826	25.1328	20.6666
slr0729	Slr0729	Thylakoid-associated protein slr0729	101	10.946	1	5	64.4	13	0	51.022	1.46512	0.482979	25.2428	24.9121	24.682	24.8367	24.7412	20.8637
slr0665	AcnB	Aconitate hydratase B	868	93.551	1	5	6.6	16	0	44.505	1.45624	1.41684	22.9779	23.0319	22.9148	22.2226	21.7252	20.6081
slr0886	FabG	3-oxoacyl-[acyl-carrier-protein] reductase	247	25.723	1	4	19	17	0	48.561	1.4497	0.889276	23.5752	23.4811	23.4087	23.11	22.4324	20.5735
slr0869	Slr0869	Slr0869 protein	812	92.531	1	5	7.4	8	0	40.464	1.42543	1.52247	21.6413	21.1359	22.2147	20.1941	19.743	20.7785
sll0480	DapL	LL-diaminopimelate aminotransferase	412	45.087	1	10	27.7	31	0	86.476	1.41147	0.939358	25.4204	24.1902	24.1948	23.9852	23.5036	22.0823
slr1994	PhaB	Acetoacetyl-CoA reductase	240	25.333	1	5	24.2	8	0	41.136	1.40609	0.870823	22.2055	22.6925	21.4705	22.0083	19.8174	20.3244
sll0934	CcmA	Carboxysome formation protein	351	37.633	1	4	15.4	12	0	31.859	1.403	1.24905	23.2346	23.2367	22.6248	22.134	22.0968	20.6564
sll0887	Sll0887	Sll0887 protein	446	47.599	1	3	9	3	0	19.499	1.38334	2.06219	21.3928	21.7749	21.2451	20.4258	19.6203	20.2167
sll1341	BfrA	Bacterioferritin	156	18.331	1	2	14.7	6	0	18.75	1.3792	0.999467	22.7016	21.9813	22.0778	21.4994	19.6613	21.4624
slr0164	ClpR	Putative ATP-dependent Clp protease proteolytic subunit-like	225	24.881	1	3	13.3	12	0	34.843	1.37009	0.829029	23.2406	22.7758	23.1271	22.3774	22.4833	20.1725
slr0585	ArgG	Argininosuccinate synthase	400	44.484	1	11	32	27	0	94.01	1.3535	1.64592	25.0045	24.9913	24.7626	23.9599	23.9051	22.833
slr0898	NirA	Ferredoxin--nitrite reductase	502	55.926	1	6	12.9	25	0	48.67	1.34115	0.650532	23.8163	24.0137	23.8468	23.4239	23.5373	20.6921
sll0199	PetE	Plastocyanin	126	13.146	1	5	66.7	40	0	91.896	1.33116	1.40462	26.8232	27.4075	27.4454	26.6591	25.6689	25.3546
sll0057	GrpE	Protein GrpE	249	27.567	1	9	52.2	24	0	93.23	1.32687	0.511644	24.6722	24.5022	24.1952	24.2351	24.2799	20.874
slr0193	Slr0193	RNA-binding protein	151	16.616	1	2	17.9	9	0	13.488	1.31597	0.860934	22.1827	22.6149	22.6025	22.4851	20.1379	20.8292
sll0258	PsbV	Cytochrome c-550	160	17.884	1	7	54.4	36	0	94.386	1.30065	1.19472	27.7681	28.4821	28.1249	27.654	26.7864	26.0328
sll1029	CcmK1	Carboxysome shell protein CcmK1	111	12.102	1	10	70.3	51	0	194.88	1.29989	1.37639	27.8887	27.961	27.8525	27.0806	26.9993	25.7227
sll1398	Psb28	Photosystem II reaction center Psb28 protein	112	12.59	1	3	36.6	13	0	42.188	1.29987	0.509107	24.0111	24.282	24.181	24.2696	23.6484	20.6564
slr1963	Slr1963	Orange carotenoid-binding protein	317	34.658	1	14	47.9	55	0	183.64	1.29495	1.51231	27.7967	27.9812	27.5542	27.0381	26.6433	25.7658
slr0394	Slr0394	phosphoglycerate kinase	400	41.67	1	20	56.2	94	0	301.73	1.29046	1.28741	28.2937	28.5391	28.1027	27.7445	27.1315	26.1881
sll1470	LeuC	3-isopropylmalate dehydratase large subunit	468	50.458	1	5	12.4	11	0	38.539	1.28807	0.962292	22.7626	22.6914	22.2436	21.7345	22.0205	20.0783
chr1_280681	Chr1_280681	Hypothetical protein [811257 - 810925]	111	12.88	1	1	6.3	5	0.0029586	6.0988	1.28409	0.228726	18.9202	19.2605	25.5951	19.9442	19.3806	20.5987
slr1854	Slr1854	Slr1854 protein	198	22.293	1	7	41.9	20	0	51.815	1.27956	0.571327	24.4001	24.2788	23.698	24.0189	23.6031	20.9162
sll1356	GlgP	Glycogen phosphorylase	849	96.648	1	9	10.2	15	0	59.154	1.26062	0.672893	23.7835	23.0864	23.1832	22.8862	22.9382	20.4467
slr0013	Slr0013	Slr0013 protein	175	18.69	1	3	21.1	10	0	25.508	1.24191	0.541032	22.1808	19.2399	22.1807	19.6084	19.8054	20.4618
slr0623	TrxA	Thioredoxin	107	11.748	1	8	73.8	44	0	94.345	1.24136	0.878634	26.4966	27.1317	26.8135	26.6158	25.6686	24.4333
sll0227	Sll0227	Probable peptidyl-prolyl cis-trans isomerase sll0227	246	26.58	1	5	32.1	16	0	38.113	1.24083	0.64129	24.0709	23.3277	23.5071	23.0249	23.4354	20.7229
slr0006;chr1_109609	Slr0006	Slr0006 protein	217;249	23.373	2	6;6	40.6	27	0	55.361	1.21193	3.65221	25.0787	24.9302	24.8991	23.7812	23.8788	23.6122
slr1289	Slr1289	isocitrate dehydrogenase (NADP+)	475	52.258	1	5	10.5	14	0	43.358	1.21182	0.748701	23.6969	23.898	23.9038	23.536	23.1715	21.1558
slr1367	GlgP	Alpha-1,4 glucan phosphorylase	855	98.304	1	7	8.9	11	0	43.507	1.20576	1.10453	22.7123	22.2667	21.5165	20.344	21.643	20.8913
sll1070;chr1_280351	TktA	Transketolase	670;676	71.724	2	21;20	43.9	82	0	296.06	1.18284	1.31297	28.0288	27.7559	27.6536	27.1407	26.923	25.8261
slr1176	GlgC	Glucose-1-phosphate adenylyltransferase	439	49.366	1	14	39.9	42	0	138.59	1.17558	1.20881	25.2618	25.4151	25.4174	24.6732	24.6127	23.2816
sll0145	Frr	Ribosome-recycling factor	182	20.186	1	6	22.5	17	0	52.448	1.16924	1.46873	24.0547	24.4633	24.1659	23.6807	23.0206	22.475
slr1839	CcmK4	Carboxysome shell protein CcmK4	112	11.903	1	3	30.4	10	0	23.085	1.16695	1.04192	23.2946	23.4394	23.5503	22.7868	22.7772	21.2194
sll1883	ArgJ	Arginine biosynthesis bifunctional protein ArgJ	413	43.32	1	6	14.8	14	0	48.83	1.1567	0.694168	22.7394	22.6558	23.0401	22.7748	21.9597	20.2307
sll0051	Sll0051	Sll0051 protein	159	17.799	1	3	19.5	12	0	23.448	1.15542	1.06129	22.9166	23.6793	22.8568	22.5889	22.2563	21.1412
slr1887	HemC	Porphobilinogen deaminase	320	34.894	1	8	23.1	14	0	63.159	1.15111	0.616207	23.8902	23.7979	23.5407	23.5068	23.3391	20.9297
slr1855	Slr1855	Slr1855 protein	607	70.003	1	10	16.5	27	0	75.149	1.1477	1.00868	24.7434	24.1626	23.6684	23.3672	23.58	22.1841
sll0018	FbaA	Fructose-bisphosphate aldolase class 2	359	38.972	1	18	44	89	0	285.58	1.13786	1.21992	28.3962	28.4856	28.0898	27.6224	27.5924	26.3431
sll0872	Sll0872	Sll0872 protein	130	13.929	1	3	28.5	16	0	38.698	1.13735	0.381895	23.2494	24.2519	24.4493	24.5135	23.4972	20.528
slr1852	Slr1852	Slr1852 protein	188	21.834	1	9	44.1	34	0	79.143	1.11091	0.920438	26.2085	26.5729	26.0327	25.9136	25.4564	24.1114
sll1958	Sll1958	histidinol phosphate aminotransferase	367	40.686	1	3	9	7	0	22.142	1.10863	1.3141	21.6868	21.504	21.3548	20.3662	19.7639	21.0897
slr1909;chr1_27317	Slr1909	NarL subfamily	213;233	24.046	2	2;2	10.3	8	0	13.453	1.10392	1.92256	21.1337	21.1003	21.2653	20.1616	19.5931	20.4329
sll1262	NdhN	NAD(P)H-quinone oxidoreductase subunit N	161	17.629	1	5	35.4	13	0	66.424	1.10037	0.367182	24.5151	24.1977	24.5633	24.4365	24.7037	20.8347
slr1751	Prc	Carboxyl-terminal protease	423	46.832	1	11	30.5	24	0	90.851	1.09685	0.680059	23.3696	23.7162	23.7756	23.6082	22.8069	21.1557
slr1722	GuaB	IMP dehydrogenase subunit	387	40.234	1	12	39.5	43	0	118.49	1.09522	1.64374	25.9078	25.7895	25.6035	25.0926	24.809	24.1135
sll0617	Sll0617	Protein sll0617	267	28.905	1	10	40.8	43	0	107.27	1.0797	0.955946	25.3703	25.4886	25.2704	25.057	24.5437	23.2895
slr1020	SqdB	Sulfolipid biosynthesis protein SqdB	383	43.202	1	8	26.9	22	0	82.73	1.07327	1.26232	25.0591	24.6727	24.6829	24.3369	23.8218	23.0362
sll1234	AhcY	Adenosylhomocysteinase	425	46.213	1	10	32	36	0	117.5	1.06671	2.47453	25.8077	25.7499	25.4857	24.7684	24.738	24.3366
slr1604	FtsH3	ATP-dependent zinc metalloprotease FtsH 3	616	67.25	1	5	9.9	9	0	34.052	1.06311	1.0157	23.2062	22.4334	22.0852	21.89	21.859	20.7865
slr0452	IlvD	Dihydroxy-acid dehydratase	561	58.646	1	9	15.5	31	0	76.492	1.06191	1.06877	25.1209	25.2283	24.6465	24.5566	24.1465	23.1069
slr1124	Slr1124	phosphoglycerate mutase	443	49.344	1	3	9.5	12	0	33.571	1.05445	0.882796	22.7589	23.2044	22.1547	22.0275	22.2019	20.7252
slr1079;slr1082;slr0489	Slr1079	Slr1079 protein	164;136;151	19.037	3	1;0;0	48.2	2	0	18.828	1.04786	0.176308	18.5361	19.2626	25.5859	19.7529	19.8699	20.6184
sll0928	ApcD	Allophycocyanin subunit alpha-B	161	17.923	1	12	72	40	0	165.87	1.04384	0.96814	27.6558	27.7451	27.4784	27.3372	26.7706	25.6399
sll1194	PsbU	Photosystem II 12 kDa extrinsic protein	131	14.245	1	8	48.1	33	0	118.53	1.04065	0.857136	26.5764	27.5828	27.3182	26.907	26.19	25.2584
sll1028	CcmK2	Carboxysome shell protein CcmK2	103	11.135	1	6	85.4	48	0	94.156	1.03793	1.07499	26.8836	27.4093	27.3787	26.9411	26.1295	25.4872
slr1234	Slr1234	Uncharacterized HIT-like protein slr1234	114	12.456	1	3	20.2	10	0	22.147	1.03335	1.25445	21.6474	22.0223	22.0569	21.5251	20.267	20.8345
ssl1972	Ssl1972	UPF0367 protein ssl1972	93	9.9234	1	2	20.4	5	0	13.626	1.03173	0.243332	22.7406	22.8129	17.89	20.1545	19.4299	20.7639
ssl0707	GlnB	Nitrogen regulatory protein P-II	112	12.397	1	10	82.1	55	0	179.67	1.02002	1.09249	27.351	27.6511	27.5124	27.2845	26.3607	25.8093
sll1526	Sll1526	Uncharacterized protein sll1526	506	57.726	1	5	12.1	10	0	32.526	1.00731	0.712076	22.8304	22.5593	22.4276	22.1736	22.292	20.3298
slr1843	Zwf	Glucose-6-phosphate 1-dehydrogenase	509	57.885	1	12	23.2	29	0	98.866	1.00433	0.455566	23.6078	23.7862	23.9939	23.8589	23.6067	20.9093
ssr1528	Ssr1528	Ssr1528 protein	94	10.118	1	8	56.4	39	0	112.91	1.00413	0.760088	26.6022	27.004	26.2361	26.5525	25.6805	24.5968
slr0783	TpiA	Triosephosphate isomerase	242	26.158	1	4	14.9	13	0	32.458	0.986843	0.595217	22.8079	23.0301	22.8853	23.1374	22.0382	20.5871
sll0550	Dfa1	Diflavin flavoprotein A 1	573	63.505	1	4	6.1	10	0	27.434	0.982599	0.845863	23.0905	22.7989	22.5414	22.4677	22.2077	20.8075
sll1393	GlgA2	Probable glycogen synthase 2	491	56.224	1	3	5.9	10	0	22.408	0.982462	1.2093	21.1348	20.9986	21.0605	20.0438	19.4444	20.7582
slr0032	IlvE	Probable branched-chain-amino-acid aminotransferase	305	33.951	1	6	26.9	15	0	48.355	0.981281	2.26903	23.8783	23.7194	23.2924	22.5833	22.713	22.6499
sll2001	Sll2001	leucine aminopeptidase	508	53.885	1	5	11.6	18	0	47.456	0.972005	0.701779	23.0922	23.0605	22.6126	22.608	22.5152	20.7261
sll1815;chr1_279789	Adk1	Adenylate kinase 1	187;194	20.453	2	6;6	47.6	18	0	58.803	0.971363	1.33285	23.7074	24.4782	24.2676	23.5865	23.2333	22.7194
slr2025	Slr2025	Slr2025 protein	153	16.888	1	3	25.5	7	0	24.429	0.96984	0.577452	23.0502	23.5861	22.8343	23.165	22.5991	20.797
slr1295	FutA1	Iron uptake protein A1	360	39.37	1	4	10.3	5	0	24.605	0.967683	0.965845	21.2927	21.6485	21.4514	19.5981	21.0989	20.7925
slr1220	Slr1220	Slr1220 protein	317	36.009	1	3	9.5	12	0	25.156	0.967159	1.48218	22.4665	22.4144	22.2217	21.7863	21.5894	20.8253
sll0680	PstS	Phosphate-binding protein	383	40.023	1	3	11.7	6	0	25.684	0.966513	0.331716	18.8851	21.9774	22.6342	19.9569	19.7993	20.841
slr1761	YtfC	Peptidyl-prolyl cis-trans isomerase	201	21.555	1	5	24.9	20	0	48.899	0.961488	0.563308	23.205	24.6791	23.5674	23.8929	22.908	21.7662
sll1099	Tuf	Elongation factor Tu	399	43.733	1	35	82	211	0	323.31	0.960794	1.65201	29.8632	29.4942	29.4471	28.9051	28.835	28.1821
sll1559	Sll1559	Soluble hydrogenase 42 kD subunit	384	40.768	1	13	37.2	55	0	137.48	0.958516	1.23021	26.9369	26.864	26.6769	26.3508	26.0825	25.169
sll1663	Sll1663	Sll1663 protein	220	24.104	1	3	14.5	11	0	35.94	0.954082	1.0987	21.8697	22.5752	22.0819	21.7347	21.3793	20.5506
slr1051;chr1_22344	FabI	Enoyl-[acyl-carrier-protein] reductase [NADH] FabI	258;315	27.625	2	6;6	26.7	15	0	45.872	0.915167	0.7352	22.7216	22.5257	22.4023	22.4743	21.8646	20.5653
slr1463	FusA	Elongation factor G 1	695	76.749	1	24	37.6	89	0	229.68	0.904025	1.27916	26.7385	26.6594	26.3994	26.0053	26.0153	25.0646
sll1721	PdhB	Pyruvate dehydrogenase E1 component subunit beta	324	35.709	1	4	14.2	4	0	29.896	0.901237	0.123016	26.163	18.6378	17.8279	19.948	19.3737	20.6033
sll1317	PetA	Cytochrome f	328	35.23	1	8	27.4	31	0	90.641	0.888694	1.07015	25.8977	26.0946	25.6359	25.2958	25.4101	24.2563
ssr1480;sll0517;chr1_175592	Ssr1480	RNA-binding protein	83;101;140	9.3904	3	4;2;2	80.7	18	0	101.15	0.888033	0.806023	26.0228	26.5921	26.4213	26.0406	25.8278	24.5037
sll0224	Sll0224	Sll0224 protein	298	32.829	1	3	13.4	11	0	26.912	0.8752	0.897666	21.2876	21.3946	21.1032	20.961	19.5069	20.6919
sll0927;chr1_302301	Sll0927	S-adenosylmethionine synthetase;chr1_302301 Hypothetical protein [341047 - 339740]	409;436	43.898	2	7;7	13.9	16	0	49.257	0.874357	2.4009	23.7341	23.5005	23.3343	22.6148	22.8182	22.5128
slr0506	Por	Light-dependent protochlorophyllide reductase	322	36.061	1	4	13	14	0	37.394	0.872566	0.609288	22.5893	22.2177	22.246	22.5447	21.5304	20.3603
slr0118	ThiC	Phosphomethylpyrimidine synthase	459	51.137	1	2	4.4	5	0	13.733	0.861128	0.694418	21.2623	21.1689	20.8255	19.7136	19.6379	21.3217
slr1409	Slr1409	WD repeat-containing protein slr1409	326	35.759	1	7	26.4	22	0	68.211	0.851096	0.370909	23.7395	23.7617	23.6468	23.738	23.9093	20.9475
slr1894	Slr1894	Protein slr1894	156	17.755	1	7	43.6	36	0	68.578	0.847668	0.900195	26.0204	26.4086	26.0954	25.8444	25.6479	24.4891
slr1924	Slr1924	D-alanyl-D-alanine carboxypeptidase	400	44.315	1	2	4.8	4	0	14.176	0.846963	1.51821	21.1932	20.9637	20.5492	20.0079	19.7768	20.3805
sll1762	Sll1762	periplasmic protein, putative polar amino acid transport system substrate-binding protein	299	32.831	1	7	25.8	15	0	60.393	0.830868	0.638944	22.8212	22.9289	22.5497	22.5862	22.4333	20.7877
sll1213	Fcl	GDP-L-fucose synthase	312	34.719	1	7	25.3	28	0	59.653	0.827544	1.10709	24.9875	24.96	24.7998	24.7001	24.0644	23.5002
slr1165	Sat	Sulfate adenylyltransferase	390	43.695	1	9	23.1	23	0	58.828	0.820366	1.17684	24.1749	24.0335	23.742	23.5063	23.4219	22.5612
sll1785	Sll1785	Sll1785 protein	268	30.011	1	5	22	13	0	38.422	0.814969	0.701636	22.781	23.0122	22.8669	22.5961	22.5982	21.0208
sll1757	Sll1757	Sll1757 protein	292	31.717	1	3	11.6	6	0	22.099	0.810943	0.698349	22.1183	21.7513	21.2486	21.5463	21.1457	19.9934
slr0645	Slr0645	Slr0645 protein	206	22.785	1	2	7.8	5	0	11.846	0.80861	0.900517	21.4622	21.5382	21.1275	19.9285	21.3021	20.4715
slr1986	ApcB	Allophycocyanin beta chain	161	17.215	1	14	92.5	127	0	319.55	0.798635	1.08539	31.7588	31.9406	31.6321	31.3894	31.2295	30.3167
sll1525	Sll1525	phosphoribulokinase	332	37.914	1	12	39.5	67	0	140.56	0.794957	2.75058	26.6514	26.6626	26.5312	25.9828	25.8359	25.6417
sll0529	Sll0529	Sll0529 protein	731	78.316	1	18	37.2	62	0	216.08	0.791929	0.871878	27.3958	26.9877	26.8075	26.8005	26.4928	25.522
sll0837	Sll0837	Sll0837 protein	294	32.906	1	6	21.8	12	0	51.992	0.791106	0.603473	22.8791	22.8111	22.4625	22.6567	22.3259	20.7967
slr2067	ApcA	Allophycocyanin alpha chain	161	17.412	1	12	80.1	116	0	323.31	0.770545	0.965461	32.51	32.5643	32.298	32.2706	31.7744	31.0158
ssl3364	Ssl3364	Ssl3364 protein	74	8.2948	1	3	35.1	14	0	49.211	0.770345	0.832126	24.4266	25.2023	24.6716	24.4634	24.2449	23.2812
slr2094	Slr2094	D-fructose 1,6-bisphosphatase class 2/sedoheptulose 1,7-bisphosphatase	345	37.074	1	20	54.8	102	0	319.49	0.762377	1.21809	29.2674	29.2038	28.9862	28.7229	28.6169	27.8304
sll1712	Hup	DNA-binding protein HU	100	10.891	1	9	52	40	0	73.97	0.76181	0.960982	26.6213	26.9099	26.3507	26.3535	26.0171	25.2258
slr1590	Slr1590	Slr1590 protein	295	32.604	1	4	13.6	6	0	30.027	0.760863	1.27574	22.4557	21.9807	22.1489	21.7106	21.6417	20.9504
slr0821	Slr0821	hypothetical protein	91	9.7249	1	3	24.2	9	0	29.849	0.756089	0.110475	17.8708	24.335	24.0172	23.807	19.3789	20.7688
sll1069	FabF	3-oxoacyl-[acyl-carrier-protein] synthase 2	416	44.004	1	5	13	7	0	32.824	0.74807	0.208942	22.3947	22.4263	18.3028	20.5013	19.8601	20.5183
sll1784	Sll1784	Sll1784 protein	267	29.757	1	4	17.2	14	0	43.242	0.747658	0.901175	23.3822	24.1656	23.8933	23.6436	22.9797	22.5748
sll0576	Sll0576	HrEpiB	312	34.951	1	7	22.4	26	0	63.943	0.747119	1.42554	23.9537	24.0225	24.3494	23.7808	23.1087	23.1948
sll0421	PurB	Adenylosuccinate lyase	431	48.42	1	9	23.7	25	0	73.019	0.741975	0.987045	23.6054	23.6427	23.2657	23.1026	23.0853	22.0999
slr0343	PetD	Cytochrome b6-f complex subunit 4	160	17.444	1	2	24.4	8	0	17.109	0.740538	0.0921886	25.4749	24.1911	17.6059	24.6452	19.7437	20.6614
slr0009	CbbL	Ribulose bisphosphate carboxylase large chain	470	52.49	1	34	64.9	217	0	323.31	0.738798	1.46685	30.9401	30.3726	30.4247	29.9246	30.0434	29.5531
sll1694	HofG	General secretion pathway protein G	168	17.573	1	3	17.3	21	0	28.847	0.731696	0.759227	25.8244	25.9535	25.6711	25.7527	25.2349	24.2663
slr1734	OpcA	Putative OxPP cycle protein OpcA	475	52.033	1	6	17.3	9	0	56.841	0.72939	0.198401	22.9392	19.43	22.7501	19.7918	22.5958	20.5435
sll0427	PsbO	Photosystem II manganese-stabilizing polypeptide	274	29.911	1	13	51.8	48	0	185.87	0.725206	0.784096	28.1277	28.4196	27.9776	28.092	27.5602	26.6971
slr0012	CbbS	Ribulose bisphosphate carboxylase small subunit	113	13.239	1	6	62.8	50	0	115.21	0.724764	1.38505	30.4225	29.8149	29.6892	29.363	29.3196	29.0698
sll1418;chr1_246215	Sll1418	Sll1418 protein	188;205	20.747	2	4;4	28.7	15	0	38.877	0.717239	0.387169	22.1316	22.6456	22.314	22.5072	22.3131	20.1192
sll0274	Sll0274	Sll0274 protein	196	21.473	1	3	16.8	6	0	22.711	0.709395	0.502589	21.3232	21.6567	21.5587	21.658	19.6244	21.1281
slr1666	DegT	Pleiotropic regulatory protein	385	41.596	1	1	3.1	1	0	9.3637	0.704235	0.116382	18.3535	19.1669	25.2104	20.1799	19.521	20.9172
sll0588	Sll0588	Sll0588 protein	153	16.516	1	1	5.2	6	0	7.3378	0.703207	0.16164	19.0879	19.6525	24.1158	19.9481	19.7975	21.001
sll0504	LysA	Diaminopimelate decarboxylase	469	50.847	1	4	11.3	7	0	28.037	0.634539	0.193715	18.4327	21.8642	22.2265	19.6246	20.1807	20.8145
ssl0352	Ssl0352	Ssl0352 protein	58	6.5774	1	5	82.8	26	0	58.363	0.634424	1.10042	25.5336	25.6878	25.6329	25.5162	24.7583	24.6765
slr1198	Slr1198	Rehydrin	211	23.559	1	14	59.2	82	0	158.93	0.62767	1.33817	28.3356	28.6686	28.2939	28.1575	27.724	27.5336
sll1621	Sll1621	Peroxiredoxin sll1621	189	21.167	1	13	47.6	47	0	116.23	0.619494	0.749023	26.902	27.3539	27.2719	27.2428	26.3598	26.0667
sll1342	Sll1342	NAD(P)-dependent glyceraldehyde-3-phosphate dehydrogenase	337	36.492	1	16	50.4	88	0	237.76	0.616981	1.93481	27.948	27.8766	27.8868	27.4796	27.3619	27.0189
slr0483;chr1_115955	Slr0483	Slr0483 protein	149;162	16.885	2	4;4	21.5	19	0	50.163	0.604694	0.540178	23.9094	24.1684	23.3542	23.9096	23.2883	22.42
slr1030	ChlI	Magnesium-chelatase subunit ChlI	357	39.463	1	4	15.1	6	0	25.75	0.589714	0.274928	21.604	19.4217	21.7277	20.0469	19.7747	21.1626
slr0752	Eno	Enolase	432	46.528	1	13	38.7	37	0	156.4	0.577969	1.69378	25.9568	25.9056	25.7275	25.4596	25.3844	25.0121
slr0899	CynS	Cyanate hydratase	149	16.532	1	3	24.2	14	0	25.636	0.566737	0.819908	23.4472	23.3181	22.905	23.0437	22.8022	22.1242
ssr3383	Ssr3383	phycobilisome small core linker polypeptide	67	7.8051	1	7	79.1	30	0	68.344	0.552605	0.372972	26.8013	27.5767	26.9835	27.6775	26.2745	25.7517
slr1022	ArgD	Acetylornithine aminotransferase	429	46.567	1	4	14.2	9	0	31.77	0.544694	0.096938	23.3905	23.9507	18.1553	20.1765	22.8402	20.8457
slr1744	AmiA	N-acetylmuramoyl-L-alanine amidase	649	70.011	1	3	4.8	13	0	21.602	0.540807	0.498514	22.0795	22.154	22.5565	22.2445	22.0964	20.8267
slr0550	DapA	4-hydroxy-tetrahydrodipicolinate synthase	301	31.821	1	4	15.6	14	0	36.405	0.540031	0.9139	21.7813	21.4923	21.3543	21.456	20.9393	20.6126
sll1533	PilT	Twitching mobility protein	428	47.898	1	3	6.5	10	0	21.124	0.501413	0.81569	20.9393	21.0256	21.3352	20.2365	20.4614	21.0979
slr0355	BioU	(S)-8-amino-7-oxononanoate synthase BioU	331	35.387	1	1	2.1	3	0.0043415	5.8508	0.499032	0.097957	18.3904	19.285	24.1947	19.7563	19.9523	20.6643
ssr0390;chr1_7007	PsaK1	Photosystem I reaction center subunit PsaK 1	86;95	8.6442	2	1;1	19.8	5	0	31.535	0.486708	0.0853021	18.4291	19.0034	24.7332	20.3838	19.8354	20.4864
sll1873	Sll1873	Sll1873 protein	121	12.906	1	5	71.9	26	0	73.413	0.486318	0.364912	24.5003	25.5552	24.9183	25.4339	24.0331	24.0478
slr1459	ApcF	Allophycocyanin subunit beta-18	169	18.892	1	10	58	67	0	139.68	0.473436	1.29859	27.0272	27.1419	27.0975	26.8882	26.6476	26.3104
sll1463	FtsH4	ATP-dependent zinc metalloprotease FtsH 4	628	68.198	1	4	7.5	11	0	25.297	0.462472	0.341106	22.5567	22.4462	21.7031	22.1996	22.3286	20.7904
sll0533	Tig	Trigger factor	471	52.61	1	6	11.5	17	0	48.93	0.458946	0.868231	23.1859	23.3681	23.2874	23.1578	22.9506	22.3562
slr2075	GroES	Co-chaperonin GroES	103	10.859	1	9	79.6	49	0	137.54	0.449969	1.26437	27.6417	27.8332	27.6648	27.4363	27.4009	26.9525
sll0058	DnaK1	Chaperone protein dnaK1	692	75.178	1	3	4.5	4	0	22.745	0.447673	0.213674	21.7999	19.2594	21.0272	20.0416	19.8436	20.8583
sll1185	HemF	Oxygen-dependent coproporphyrinogen-III oxidase	340	38.937	1	4	10.6	14	0	27.886	0.437471	0.0710493	23.7114	23.5231	17.6769	22.8345	19.9771	20.7873
slr0757	KaiB1	Circadian clockcillator protein KaiB1	105	11.935	1	2	10.5	5	0	12.798	0.431751	0.0729808	24.475	19.2031	17.7107	19.9728	19.5299	20.5909
sll0020;slr1641	ClpC	ATP-dependent Clp protease regulatory subunit	821;872	91.173	2	3;0	7.2	11	0	41.562	0.429868	0.849297	23.1367	22.8048	22.4712	22.3876	22.6023	22.1333
sll1471	CpcL	Photosystem I-associated linker protein CpcL	249	28.522	1	13	53.8	48	0	116.58	0.42817	1.2921	25.9254	25.9029	25.64	25.5817	25.4458	25.1563
slr0163;chr1_98110	Slr0163	a part of pilC, pilin biogenesis protein, required for twitching motility;chr1_98110 Hypothetical protein [2204467 - 2205369]	247;301	26.764	2	1;1	2.8	5	0.0029155	5.9034	0.395239	0.0949286	18.8598	19.0722	23.4135	19.8779	20.0212	20.2607
slr0335	ApcE	Phycobiliprotein ApcE	896	100.29	1	46	57.5	227	0	323.31	0.392286	0.929133	29.123	28.8261	28.7601	28.7539	28.5766	28.2019
slr1046	TatA	Sec-independent protein translocase protein TatA	126	13.673	1	2	19.8	6	0	13.2	0.389203	0.563047	21.6024	21.5812	21.221	21.4968	21.1952	20.545
ssl2595	Ssl2595	Ssl2595 protein	89	10.356	1	2	31.5	6	0	21.131	0.388725	0.0926458	21.7077	22.2813	17.7497	19.9386	19.5528	21.0811
slr1274	PilM	Membrane protein	367	40.879	1	3	6.3	6	0	18.752	0.372217	0.145977	21.6747	19.318	21.6386	21.4729	19.6106	20.4312
slr0877	GatA	Glutamyl-tRNA(Gln) amidotransferase subunit A	483	51.47	1	3	7.9	7	0	16.248	0.369363	0.883053	21.6248	21.4476	21.1602	21.1644	21.1983	20.7619
sll1819	RplQ	50S ribosomal protein L17	116	13.228	1	3	35.3	5	0	23.451	0.354752	0.0558547	22.8189	19.1117	23.5207	20.1663	19.3624	24.8584
slr0513	FutA2	Iron uptake protein A2	346	38.155	1	2	8.4	7	0	13.861	0.347521	0.395566	20.6958	21.3469	20.8564	21.1633	20.0709	20.6223
sll1734	Sll1734	Sll1734 protein	431	50.038	1	12	23.2	40	0	106.84	0.339858	1.4374	26.4755	26.2289	26.117	25.8999	25.9926	25.9092
slr1342	Slr1342	Slr1342 protein	445	48.519	1	3	6.1	5	0	19.918	0.337387	0.0915954	21.6966	21.4094	17.733	20.0364	19.3675	20.4229
slr0557	ValS	Valine--tRNA ligase	910	102.74	1	6	7	12	0	41.542	0.337123	0.105867	22.3827	18.8449	21.5248	19.7472	21.1677	20.8261
sll1578;chr1_284463	CpcA	C-phycocyanin alpha subunit	162;174	17.586	2	15;14	93.8	190	0	323.31	0.336791	0.703766	33.7415	33.7435	33.5193	33.6719	33.3597	32.9625
sll1218	Ycf39	Ycf39 protein	219	23.534	1	5	20.1	5	0	34.484	0.327262	0.116775	18.6873	21.5566	21.5031	20.2084	19.6295	20.9272
sll1746	RplL	50S ribosomal protein L7/L12	128	13.259	1	9	61.7	35	0	113.15	0.313755	0.903695	28.2852	28.3515	28.3545	28.3072	27.9891	27.7536
slr1044	McpA	Methyl-accepting chemotaxis protein	869	93.209	1	5	6.7	17	0	44.103	0.311841	0.481123	22.6937	22.5529	22.2543	22.3728	22.4989	21.6937
sll0170	DnaK2	Chaperone protein DnaK2	636	67.613	1	28	47.6	105	0	291.76	0.311577	0.589659	27.4512	27.1026	27.0411	27.1593	27.0003	26.5005
slr6071;slr6012	Slr6012	Slr6012 protein	730;730	84.206	2	5;5	6	10	0	31.811	0.30916	0.100332	21.3398	18.5987	21.4783	19.5596	19.5932	21.3366
slr1281	NdhJ	NAD(P)H-quinone oxidoreductase subunit J	179	20.593	1	5	25.7	27	0	43.99	0.308556	0.563624	25.1628	24.5407	24.6835	24.5886	24.688	24.1847
sll1932;chr1_290236	DnaK3	Chaperone protein dnaK3	771;794	86.029	2	1;1	1.9	6	0	8.5786	0.308093	0.0654814	18.9442	18.9033	23.7898	19.9307	20.0844	20.698
sll0853	CpcS1	Chromophore lyase CpcS/CpeS 1	186	21.213	1	3	14.5	5	0	23.087	0.302962	0.144274	21.8167	19.4857	20.821	20.902	19.6369	20.6756
FLAG	3xFLAG peptide	Cleaved 3xFLAG peptide	19	2.3242	1	5	100	197	0	314.27	0.290728	0.0666464	30.3623	34.559	31.1673	33.3576	31.0542	30.8047
sll1307;chr1_264450	Sll1307	Sll1307 protein	175;190	17.849	2	2;2	17.1	6	0	14.372	0.290389	0.0745241	22.2393	18.8752	22.285	22.0576	19.4069	21.0638
ssl1690	NdhO	NAD(P)H-quinone oxidoreductase subunit O	72	8.2885	1	4	65.3	20	0	88.606	0.284959	0.481685	25.9463	25.7441	25.5136	25.6591	25.6893	25.0007
slr2034	Ycf48	Photosystem II assembly lipoprotein Ycf48	342	37.29	1	5	14.9	20	0	44.556	0.279397	0.609666	23.4205	22.8367	23.1529	22.9196	23.0223	22.6301
slr0261;chr1_66945	Slr0261	NADH dehydrogenase subunit 7;chr1_66945 Hypothetical protein [1509984 - 1511171]	384;396	44.347	2	17;17	38.3	54	0	161.9	0.275883	1.71773	26.697	26.5489	26.6611	26.4668	26.2704	26.3422
slr2070	Slr2070	Slr2070 protein	284	31.874	1	2	6	2	0	13.796	0.271648	0.147251	21.4539	19.5344	20.7747	19.9202	19.9239	21.1039
ssl3093	CpcD	Phycobilisome 8.9 kDa linker polypeptide, phycocyanin-associated, rod	83	9.3222	1	9	96.4	74	0	211.18	0.268798	0.829122	28.5207	28.3312	28.6339	28.4405	28.2196	28.0194
slr0228	FtsH2	ATP-dependent zinc metalloprotease FtsH 2	627	68.495	1	9	16.4	23	0	72.278	0.257761	0.394089	23.9101	23.6384	23.123	23.4809	23.4193	22.9981
sll1577	CpcB	C-phycocyanin beta subunit	172	18.126	1	16	83.7	232	0	323.31	0.257702	0.409584	33.0134	32.8994	32.9197	33.0264	32.8683	32.1646
sll1665	Sll1665	Sll1665 protein	589	63.607	1	3	7.8	13	0	30.168	0.253627	0.827026	23.5406	23.6494	23.961	23.36	23.5857	23.4446
sll1450	NrtA	Nitrate/nitrite binding protein NrtA	446	48.966	1	9	25.1	42	0	101.98	0.251394	0.282226	25.1543	25.1334	24.8466	25.3005	24.9444	24.1352
slr2051	CpcG	Phycobilisome rod-core linker polypeptide CpcG	249	28.901	1	25	82.3	130	0	323.31	0.246178	0.481464	29.9038	29.699	29.7012	29.8478	29.5924	29.1252
sll1363	Sll1363	ketol-acid reductoisomerase	367	39.951	1	12	37.1	54	0	127.57	0.2444	0.497699	26.6211	25.9341	26.0693	25.9624	26.0379	25.8909
sll1106	Sll1106	Sll1106 protein	171	18.031	1	5	42.7	22	0	58.462	0.241614	0.474547	25.3394	24.9198	24.7999	24.7528	25.0467	24.5347
sll0567	Fur	Ferric uptake regulation protein	165	19.072	1	2	11.5	4	0	11.545	0.238694	0.155691	20.821	19.4247	20.8425	19.628	19.9941	20.7501
sll0377	Sll0377	transcription-repair coupling factor	1162	130.48	1	2	1.5	1	0	10.243	0.235149	0.0584147	18.5011	19.4222	22.9344	20.1856	19.404	20.5627
slr1096	LpdA	Dihydrolipoyl dehydrogenase	474	50.832	1	5	13.7	11	0	41.081	0.233741	0.0408132	23.1773	23.1986	18.1045	23.0233	19.711	21.0449
sll1130	Sll1130	Sll1130 protein	115	12.933	1	5	49.6	26	0	45.314	0.226524	0.267623	25.3207	25.0723	24.8144	25.3118	24.9463	24.2696
slr1512	Slr1512	Slr1512 protein	374	39.647	1	6	14.7	28	0	97.753	0.225541	0.160546	25.5106	25.5076	25.082	25.7918	25.4915	24.1403
sll1735	Sll1735	Uncharacterized protein sll1735	133	14.105	1	5	68.4	21	0	59.537	0.221207	0.806869	26.7465	26.827	26.8229	26.8242	26.4306	26.478
ssr1600	Ssr1600	similar to anti-sigma f factor antagonist	116	12.661	1	1	9.5	4	0	10.682	0.219554	0.0687591	18.8075	19.8169	22.2932	19.6514	19.6916	20.916
sll0689	NhaS3	High-affinity Na(+)/H(+) antiporter NhaS3	461	47.871	1	2	3.7	5	0	12.385	0.215626	0.0784363	18.5319	21.4121	21.3528	20.0582	20.0007	20.591
slr1643	PetH	Ferredoxin--NADP reductase	413	46.359	1	23	64.4	75	0	258.91	0.197575	0.833989	27.3413	27.2608	27.2407	27.2926	26.9555	27.002
slr1122	Slr1122	Slr1122 protein	250	28.176	1	3	11.6	6	0	28.368	0.193516	0.0541869	18.7446	19.7762	22.5684	19.891	19.5511	21.0666
sll0947	Hpf	Ribosome hibernation promotion factor	191	21.895	1	8	64.9	33	0	81.297	0.186279	0.395339	24.7566	24.8534	24.5806	24.7717	24.6768	24.1834
slr1847	Slr1847	Nucleoid-associated protein slr1847	114	12.135	1	3	26.3	12	0	26.513	0.181826	0.308155	23.5687	24.1996	24.327	23.8282	23.9526	23.769
sll0430	HtpG	Heat shock protein	658	75.029	1	2	3.6	4	0	17.603	0.181139	0.0801469	21.3107	19.1938	21.136	20.2282	19.7177	21.1512
slr0676	CysC	Probable adenylyl-sulfate kinase	177	19.674	1	2	13.6	2	0	18.74	0.174874	0.032712	23.7114	18.8637	17.9295	19.8532	19.7226	20.4042
slr1783	Slr1783	two-component response regulator NarL subfamily	282	31.395	1	2	6.4	3	0	16.147	0.170698	0.0653179	18.6413	21.1707	21.0685	19.9098	19.5958	20.8629
sll1031	CcmM	Carboxysome assembly protein CcmM	687	73.12	1	15	26.9	49	0	122.62	0.156115	0.585577	25.2714	25.6534	25.3915	25.3501	25.219	25.2788
sll1580	CpcC1	Phycobilisome 32.1 kDa linker polypeptide, phycocyanin-associated, rod 1	291	32.52	1	17	63.6	107	0	236.59	0.153821	0.521774	30.3048	30.0854	30.1658	30.248	29.9769	29.8696
slr1471	YidC	Membrane protein insertase YidC	384	42.626	1	4	8.3	3	0	25.081	0.147317	0.0444444	18.5083	19.6077	22.2859	19.8869	19.7904	20.2826
sll0520	NdhI	NAD(P)H-quinone oxidoreductase subunit I	193	22.15	1	13	49.7	55	0	98.066	0.146778	0.479044	26.3685	26.4291	26.3117	26.3558	26.3475	25.9657
slr0447	AmiC	Negative aliphatic amidase regulator	446	48.359	1	5	18.8	22	0	67.765	0.142055	0.12391	24.6714	24.71	24.7808	25.244	24.6845	23.8075
sll1867;slr1311;slr1181	PsbA2	Photosystem II protein D1 2	360;360;360	39.721	3	6;6;3	20.3	33	0	99.007	0.123994	0.496291	26.2467	26.6223	26.4342	26.3096	26.2906	26.331
slr1853	Slr1853	Slr1853 protein	113	12.111	1	3	29.2	6	0	30.53	0.118871	0.0269284	19.0431	22.975	18.3737	19.749	19.5537	20.7325
sll1325	AtpH	ATP synthase subunit delta	185	20.093	1	5	30.3	19	0	41.923	0.0932713	0.348684	24.5548	24.4814	24.3926	24.2244	24.5695	24.3551
sll0272	Sll0272	hypothetical protein	141	15.78	1	1	17	4	0	10.953	0.0859928	0.0225152	18.644	19.2092	22.5956	20.0649	19.504	20.622
slr1106	Phb	Prohibitin	282	30.569	1	7	26.6	21	0	51.418	0.0802822	0.0592483	22.7218	23.2412	24.0817	23.001	23.7706	23.0323
sll1327	AtpG	ATP synthase gamma chain	314	34.605	1	8	34.7	32	0	136.69	0.0737336	0.197387	25.9477	25.522	25.5197	25.5813	25.6268	25.5601
slr1329	AtpD	ATP synthase subunit beta	483	51.732	1	20	65	143	0	323.31	0.0724252	0.248978	29.4697	29.2068	29.357	29.4117	29.114	29.2906
slr1513	Slr1513	Membrane-associated protein slr1513	110	12.007	1	8	55.5	49	0	118.06	0.0715548	0.0933541	28.5273	28.3064	28.5686	28.759	28.5395	27.8891
sll1214	AcsF1	Magnesium-protoporphyrin IX monomethyl ester [oxidative] cyclase 1	358	42.153	1	3	11.2	4	0	28.571	0.0599734	0.0197919	19.1362	19.1066	22.0367	19.9323	19.6222	20.5452
slr0542	ClpP1	ATP-dependent Clp protease proteolytic subunit 1	198	21.741	1	4	24.2	8	0	36.558	0.0576413	0.0117505	18.269	19.4489	23.5134	20.0851	19.9955	20.9778
sll0851	PsbC	Photosystem II CP43 reaction center protein	460	50.302	1	11	25.2	59	0	158.49	0.0574557	0.19915	27.7439	27.6164	27.3731	27.4963	27.4994	27.5652
ssl1426	RpmI	50S ribosomal protein L35	67	7.8913	1	1	19.4	4	0	8.4043	0.0537599	0.011423	18.6048	19.1856	23.469	19.9863	20.2955	20.8163
sll1620	Sll1620	Sll1620 protein	158	17.177	1	3	17.1	5	0	16.269	0.0514011	0.0325487	20.228	19.238	21.0194	19.9611	19.9887	20.3813
slr1280	NdhK1	NAD(P)H-quinone oxidoreductase subunit K 1	248	27.345	1	12	50.8	59	0	131.48	0.0379124	0.114293	27.5345	27.2144	27.2076	27.2608	27.382	27.1999
slr1623	NdhM	NAD(P)H-quinone oxidoreductase subunit M	121	14.078	1	7	57.9	29	0	61.64	0.0338637	0.0436264	24.941	24.6146	24.5496	24.4937	25.134	24.3759
sll1536	MoeB	Molybdopterin biosynthesis MoeB protein	392	42.759	1	2	5.6	2	0	20.205	0.0252654	0.0066997	22.1523	19.6827	18.0525	20.1999	19.2737	20.3382
smr0010	PetG	Cytochrome b6-f complex subunit 5	38	4.175	1	1	21.1	4	0.0043478	5.8509	0.0205612	0.00624676	18.5132	19.3885	22.0257	19.8605	19.6183	20.3871
sll0822	Sll0822	Sll0822 protein	129	13.962	1	2	24.8	11	0	17.934	0.0166912	0.0315602	22.3872	22.9681	22.7194	22.5595	22.7114	22.7537
chr1_196227	Chr1_196227	Hypothetical protein [2732855 - 2731563]	431	49.668	1	1	1.6	2	0.0086331	5.7619	0.0163091	0.0025478	18.792	24.2902	17.5963	20.3458	19.5421	20.7416
slr0049	Slr0049	Slr0049 protein	398	44.058	1	2	5.5	2	0	22.943	0.00895246	0.00238601	22.3219	19.3661	18.4327	19.9581	19.4522	20.6836
sll0301	Sll0301	Sll0301 protein	169	18.611	1	2	13	3	0	12.598	0.00749842	0.00409858	20.5575	19.2733	20.2011	19.6455	19.4471	20.9167
smr0006	PsbF	Cytochrome b559 subunit beta	44	4.9328	1	2	97.7	15	0	48.176	0.00725683	0.00894327	25.5472	24.9046	24.8641	24.8957	25.0087	25.3897
slr1719	Slr1719	DrgA protein homolog	201	22.758	1	6	32.8	26	0	68.924	0.00201925	0.00893683	24.9226	24.8724	24.7698	24.7886	24.9712	24.799
sll0080	ArgC	N-acetyl-gamma-glutamyl-phosphate reductase	351	38.209	1	2	6.6	6	0	17.366	0.00182851	0.000436551	22.7142	19.6564	18.1224	20.1806	19.8004	20.5064
slr0906	PsbB	Photosystem II CP47 reaction center protein	507	55.902	1	14	37.9	60	0	202.2	-0.00233078	0.00291291	27.9875	27.3177	27.1826	27.4623	27.6518	27.3806
slr1835	PsaB	Photosystem I P700 chlorophyll a apoprotein A2	731	81.291	1	9	11.4	51	0	133.57	-0.00567945	0.0121199	28.444	28.3818	28.1511	28.2724	28.1476	28.5739
sll1994	HemB	Delta-aminolevulinic acid dehydratase	327	36.163	1	10	24.5	35	0	85.206	-0.00711314	0.0136846	24.0125	24.162	23.9895	24.1549	24.2861	23.7443
slr1645	Slr1645	photosystem II 11 kD protein	135	14.917	1	4	49.6	16	0	41.043	-0.0125777	0.0329799	24.0133	24.0097	24.2652	24.2608	23.9281	24.137
sll1579	CpcC2	Phycobilisome 32.1 kDa linker polypeptide, phycocyanin-associated, rod 2	273	30.797	1	17	59.3	88	0	223.81	-0.0144857	0.0333435	29.5213	29.2393	29.1018	29.4465	29.1734	29.2859
slr0476	Slr0476	Slr0476 protein	136	14.394	1	1	10.3	4	0	13.05	-0.0215549	0.00696065	19.0985	18.8673	21.9371	19.5187	20.3349	20.1141
sll1830	Sll1830	Sll1830 protein	358	39.648	1	5	13.1	15	0	39.658	-0.023241	0.0739728	23.071	23.0513	22.8662	22.9318	22.9291	23.1972
slr1756	Slr1756	glutamate--ammonia ligase	473	52.999	1	18	44	107	0	264.68	-0.0236937	0.0410114	28.0523	27.4908	27.5924	27.8364	27.8223	27.548
sll0359;chr1_221462	Sll0359	hypothetical protein;chr1_221462 Hypothetical protein [2146473 - 2146003]	128;157	14.082	2	10;9	70.3	35	0	130.24	-0.0290432	0.0415511	25.8237	26.5704	26.2063	26.1916	26.0763	26.4196
slr0041;chr1_140658	CmpB	Bicarbonate transport system permease protein CmpB	280;288	31.023	2	2;1	5.7	4	0	13.645	-0.031606	0.0170297	19.1935	19.7174	20.9164	19.9097	19.4099	20.6025
sll0542	AcsA	Acetyl-coenzyme A synthetase	653	73.051	1	5	8.9	11	0	39.799	-0.0445379	0.0088479	22.4258	22.2711	17.7426	21.9304	19.785	20.8576
slr0172	GuaB	IMP dehydrogenase	155	17.27	1	1	8.4	4	0	27.473	-0.0514266	0.0147542	18.9232	18.9811	22.3119	19.7681	19.9289	20.6735
ssl1046	Ssl1046	Ssl1046 protein	84	9.1387	1	1	13.1	2	0	8.9749	-0.0514952	0.0202544	19.2172	19.316	21.6545	20.0195	19.6693	20.6533
slr1626	FolB	Probable dihydroneopterin aldolase	118	13.146	1	2	17.8	4	0	22.355	-0.0627225	0.0155301	18.3175	19.4124	22.7303	20.1834	19.9254	20.5396
slr1923	Slr1923	Slr1923 protein	398	44.567	1	3	7.3	3	0	18.546	-0.065787	0.0260076	18.8624	19.4653	21.423	20.3047	19.2866	20.3568
sll1294;chr1_286222	PilJ	PilJ protein	953;958	103.18	2	4;4	4.5	3	0	28.819	-0.0777874	0.0214114	22.0395	18.9809	18.3279	19.711	19.2559	20.6148
sll1326	AtpA	ATP synthase subunit alpha	503	53.965	1	22	55.3	121	0	323.31	-0.0791728	0.422075	28.9161	28.7105	28.8751	28.823	28.9224	28.9939
slr1273	Slr1273	Slr1273 protein	146	15.714	1	2	15.8	7	0	13.396	-0.0823835	0.0257426	18.7283	18.9111	21.9892	19.8679	19.7101	20.2977
slr0927;sll0849	PsbD	Photosystem II D2 protein	352;352	39.492	2	6;6	21.9	27	0	62.042	-0.0935904	0.172733	26.7856	26.3686	26.0829	26.5455	26.4994	26.473
slr1834	Slr1834	P700 apoprotein subunit Ia	751	82.935	1	16	21.6	67	0	146.79	-0.0954221	0.581878	29.1826	29.2019	28.9997	29.225	29.2826	29.1629
sll1747	AroC	Chorismate synthase	362	39.287	1	3	8	6	0	20.117	-0.0958544	0.0186245	18.3837	19.2519	23.7042	19.7756	21.3719	20.4799
ssr1789	HliA	High light inducible protein	57	6.4724	1	2	43.9	5	0	11.153	-0.110118	0.0576768	20.8973	18.9582	20.6681	20.3841	19.8134	20.6566
ssr2831	PsaE	Photosystem I reaction center subunit IV	74	8.145	1	6	83.8	35	0	202.46	-0.114299	0.609522	28.902	28.8748	28.7597	29.0418	28.8164	29.0212
ssl0242	Ssl0242	Ssl0242 protein	78	8.9765	1	1	14.1	4	0	7.0065	-0.120282	0.0535952	18.7544	19.4175	21.193	19.3907	20.1208	20.2143
slr0925	Ssb	Single-stranded DNA-binding protein 1	121	13.656	1	3	25.6	7	0	19.04	-0.122332	0.0267968	22.7545	19.2371	17.8128	19.7886	19.4772	20.9055
sll1805	RplP	50S ribosomal protein L16	139	16.035	1	3	26.6	14	0	23.894	-0.127532	0.329442	23.8819	23.4488	23.5662	23.6671	23.6664	23.946
sll1787	RpoB	DNA-directed RNA polymerase subunit beta	1102	123.36	1	10	11.1	34	0	82.956	-0.128562	0.314018	24.0765	23.6342	23.5473	23.8716	23.8274	23.9448
slr1128	Slr1128	Uncharacterized protein slr1128	321	35.727	1	6	20.9	23	0	58.145	-0.134004	0.2048	23.5037	23.1364	23.5588	23.7522	23.7455	23.1034
ssl0020	PetF	Ferredoxin-1	97	10.363	1	2	17.5	6	0	11.597	-0.136014	0.0395465	18.5545	19.1906	22.0256	19.6653	19.5043	21.0091
slr2058	TopA	DNA topoisomerase 1	898	99.339	1	2	3.1	5	0	10.243	-0.142202	0.14073	26.2496	25.2658	25.7897	25.4695	25.953	26.3093
sll0416	GroEL2	Chaperonin GroEL 2	552	57.774	1	35	68.5	140	0	323.31	-0.146175	1.39524	28.7165	28.5759	28.7007	28.8336	28.8278	28.7702
ssr0330	FtrV	Ferredoxin-thioredoxin reductase, variable chain	75	8.5576	1	1	17.3	3	0	7.6162	-0.153307	0.0406953	18.6183	19.2567	22.7024	20.4085	20.0014	20.6274
sll0534	ClpP2	ATP-dependent Clp protease proteolytic subunit 2	226	24.823	1	2	15.9	3	0	13.17	-0.153599	0.0590489	18.7811	18.9456	21.4277	19.5352	19.6523	20.4276
slr2076	GroEL1	Chaperonin GroEL 1	541	57.652	1	43	69.5	216	0	323.31	-0.163958	1.45496	29.4372	29.3071	29.4091	29.6169	29.5114	29.5169
sll0226	Ycf4	Photosystem I assembly protein Ycf4	188	20.453	1	2	15.4	5	0	10.254	-0.167235	0.0690454	19.0106	19.6378	21.7074	20.289	19.887	20.6814
slr0583	Slr0583	Slr0583 protein	310	35.232	1	2	4.8	1	0	10.283	-0.175788	0.0447898	18.1888	19.6855	22.736	20.3632	20.2413	20.5332
slr0884	Slr0884	glyceraldehyde 3-phosphate dehydrogenase 1 (NAD+)	354	37.919	1	3	11.9	6	0	20.786	-0.179563	0.054279	22.1103	19.4234	18.2694	19.9757	20.2384	20.1277
sll0244	GalE	UDP-glucose 4-epimerase	338	37.13	1	7	27.5	20	0	53.6	-0.180789	0.50794	23.286	23.2723	23.4624	23.3886	23.3671	23.8073
slr1890	BfrB	Bacterioferritin	176	20.226	1	2	12.5	5	0	12.012	-0.184542	0.0371694	18.8571	23.1518	17.6772	19.5692	20.2893	20.3812
sll7087	Sll7087	CRISPR-associated RAMP Cmr4	268	29.929	1	1	5.6	3	0.0029283	5.9817	-0.185232	0.0841558	18.8096	19.1255	20.6691	19.9498	18.7144	20.4957
slr1841	Slr1841	Slr1841 protein	630	67.6	1	1	2.5	5	0	11.65	-0.18571	0.0793028	18.615	19.4573	21.2031	19.5138	19.7536	20.5652
sll1323	AtpF2	ATP synthase subunit b	143	16.245	1	5	34.3	14	0	70.794	-0.190966	0.328877	24.9183	24.2213	24.2444	24.7783	24.6406	24.538
slr0875	MscL	Large-conductance mechanosensitive channel	145	15.805	1	1	9	3	0	9.3063	-0.194668	0.0615404	18.5628	19.2318	21.9308	19.3938	20.2142	20.7014
slr1940	Slr1940	Slr1940 protein	482	51.261	1	2	4.8	2	0	13.507	-0.203461	0.0674066	21.1963	20.8484	18.0118	19.9158	19.9214	20.8297
sll1324	AtpF	ATP synthase subunit b	179	19.804	1	10	51.4	33	0	99.262	-0.211117	1.83952	26.1145	26.0355	26.1309	26.2295	26.3111	26.3737
sll1226;chr1_242478	HoxH	Hydrogenase large subunit	474;502	52.917	2	2;2	4	4	0	12.339	-0.219695	0.0678296	21.3032	20.8397	17.9456	20.0086	19.676	21.0629
sll0521	NdhG	NAD(P)H-quinone oxidoreductase chain 6	198	21.522	1	1	6.1	6	0	11.884	-0.230101	0.0755343	18.7502	19.7301	21.9351	20.0692	19.6748	21.3617
sll1583	Lig	DNA ligase	562	61.468	1	6	12.3	20	0	51.657	-0.236148	0.602199	22.8758	22.983	22.4134	23.0084	23.0131	22.9591
ssl0563	PsaC	Photosystem I iron-sulfur center	81	8.8282	1	6	65.4	23	0	73.013	-0.240128	0.661907	28.4724	28.4479	28.8034	28.581	28.9064	28.9567
slr1256;chr1_62230	UreA	Urease subunit gamma	100;125	11.056	2	2;2	28	3	0	10.84	-0.242054	0.0561737	18.4977	22.8279	18.2622	20.0774	19.9338	20.3027
sll0587;chr1_185846	Sll0587	pyruvate kinase;chr1_185846 Hypothetical protein [2959529 - 2958039]	473;497	51.993	2	18;17	56	101	0	323.31	-0.24593	0.217445	27.7314	28.3935	29.1074	28.6145	28.3519	29.0038
slr0342	PetB	Cytochrome b6	222	25.054	1	1	5.4	1	0	9.0156	-0.246101	0.0806866	19.0713	18.863	22.003	20.1914	19.613	20.8712
slr1116	Slr1116	Slr1116 protein	173	20.103	1	2	9.8	6	0	15.036	-0.251884	0.0621179	18.3245	18.9779	22.4919	19.9133	19.3857	21.2509
sll0554	FtrC	Ferredoxin-thioredoxin reductase, catalytic chain	118	13.39	1	1	6.8	6	0	7.9335	-0.263185	0.0775515	18.653	19.6794	22.584	20.3478	20.3785	20.9796
sll0067	Gst	Glutathione S-transferase	184	20.377	1	1	6	3	0	6.9319	-0.272348	0.154764	19.0582	19.6008	21.0791	19.9862	19.8654	20.7036
sll1594	RbcR	Rubisco operon transcriptional regulator	316	35.696	1	1	2.5	1	0.0015083	6.2118	-0.27618	0.181681	18.9785	19.5131	20.4229	19.2998	19.7874	20.6557
slr1763	Slr1763	Slr1763 protein	400	45.355	1	2	4.5	3	0	13.601	-0.281307	0.0758435	22.1505	19.4749	17.7722	19.8801	19.7332	20.6282
slr0606	Slr0606	Slr0606 protein	317	34.766	1	1	3.2	4	0	8.2839	-0.287572	0.106318	18.678	19.4116	21.6606	19.6003	20.0976	20.9149
ssl1633	Ssl1633	high light-inducible polypeptide HliC, CAB/ELIP/HLIP superfamily	47	5.1499	1	1	27.7	3	0	21.446	-0.291482	0.0928445	18.3619	19.5664	22.0804	20.1394	19.99	20.7537
slr2130	AroB	3-dehydroquinate synthase	361	38.854	1	1	2.8	2	0	6.7134	-0.294686	0.0880286	21.8598	19.2903	18.1803	19.3372	19.9113	20.9659
slr0001	Slr0001	Slr0001 protein	160	17.451	1	2	7.5	7	0	13.669	-0.295931	0.147733	18.4922	18.9805	20.7208	19.4382	19.3258	20.3173
sll1789	RpoC2	DNA-directed RNA polymerase subunit beta	1317	144.78	1	18	15.3	51	0	132.49	-0.300966	0.684105	24.8504	24.5995	24.5362	24.6208	25.0659	25.2022
slr0151	Slr0151	Slr0151 protein	320	34.915	1	3	10.3	4	0	24.864	-0.301989	0.0943305	21.8068	19.5381	17.9598	19.9606	19.7073	20.5429
sll0401	Sll0401	citrate synthase	394	44.422	1	2	4.6	2	0	13.998	-0.303794	0.113084	19.1123	18.5882	21.6197	19.7145	19.9069	20.6102
sll1771	Sll1771	Sll1771 protein	254	28.472	1	1	3.9	2	0	7.1159	-0.306873	0.192565	18.9671	19.6029	20.8217	19.6812	20.0036	20.6276
chr1_116115	Chr1_116115	Hypothetical protein [2622596 - 2622937]	114	12.952	1	1	17.5	1	0	15.253	-0.314337	0.0785582	18.8936	22.5478	18.1362	19.8881	19.7332	20.8993
sll1837	Sll1837	Sll1837 protein	145	15.467	1	1	8.3	4	0	9.5836	-0.31938	0.1603	18.6997	19.4742	20.9817	19.8979	19.5449	20.6709
slr1406	Slr1406	Slr1406 protein	181	18.752	1	1	13.3	3	0	8.2641	-0.325002	0.117308	18.4122	19.627	21.7066	19.7276	20.221	20.7721
slr1265	RpoC1	DNA-directed RNA polymerase subunit gamma	626	70.977	1	8	13.4	18	0	66.037	-0.35601	0.753828	23.4298	22.9655	22.7407	23.3328	23.3162	23.5551
slr0710	GdhA	NADP-specific glutamate dehydrogenase	428	47.312	1	3	7.2	7	0	19.364	-0.36193	0.212293	21.1792	19.1187	20.6464	20.3062	21.1183	20.6057
sll1818	RpoA	DNA-directed RNA polymerase subunit alpha	314	35.003	1	7	22.3	26	0	61.107	-0.363688	1.03673	23.8072	23.3992	23.4232	23.7146	23.9668	24.0392
sll1338	Sll1338	Sll1338 protein	187	20.183	1	1	7.5	5	0	7.4937	-0.363948	0.213818	19.1294	19.2462	20.9834	19.9807	19.7757	20.6945
sll1298	Sll1298	Putative carboxymethylenebutenolidase	246	26.941	1	3	18.7	5	0	21.707	-0.364054	0.132962	18.6841	18.9565	21.6167	19.8772	19.6192	20.8531
chr1_89481	Chr1_89481	Hypothetical protein [2012718 - 2013482]	255	28.702	1	1	4.7	2	0	9.4245	-0.368008	0.14994	18.6213	19.2751	21.4341	19.9439	19.6854	20.8053
slr2101	Slr2101	Slr2101 protein	143	15.348	1	1	6.3	4	0	6.5475	-0.369431	0.198001	19.0042	19.1085	21.1335	19.9031	19.9617	20.4897
slr1655	PsaL	Photosystem I reaction center subunit XI	157	16.624	1	4	30.6	35	0	75.267	-0.378593	0.861889	28.1532	27.9912	28.4571	28.4153	28.4394	28.8826
ssl3044	Ssl3044	Hydrogenase component	99	10.818	1	1	12.1	5	0	11.289	-0.392299	0.159826	18.0893	19.3464	21.2277	19.7967	19.8381	20.2055
slr1161	Slr1161	Slr1161 protein	199	22.952	1	2	11.1	3	0	18.057	-0.394446	0.116447	18.2455	19.3334	22.1131	19.6796	20.0574	21.1382
slr1848	HisD	Histidinol dehydrogenase	434	46.533	1	2	5.1	3	0	17.832	-0.397182	0.127602	21.6808	19.1266	17.9338	19.6546	19.7314	20.5467
slr1703	SerS	Serine--tRNA ligase	430	48.037	1	1	1.9	4	0.0015015	6.1975	-0.400379	0.25911	18.8383	19.4664	20.7456	20.2039	19.5997	20.4478
slr0628	RpsN	30S ribosomal protein S14	100	11.854	1	3	25	12	0	18.332	-0.404104	1.22872	23.5116	23.7356	23.7419	23.8056	24.1425	24.2534
sll1030	CcmL	Carboxysome shell vertex protein CcmL	100	10.638	1	1	10	4	0	8.2342	-0.404508	0.157558	18.3759	19.5469	21.3544	20.0305	19.5152	20.9452
slr1624	Slr1624	Slr1624 protein	458	51.008	1	2	6.8	3	0	13.363	-0.410088	0.133961	18.9206	21.8105	18.3472	19.9494	19.5853	20.774
sll1275	Pyk2	Pyruvate kinase 2	591	62.985	1	3	5.9	3	0	24.119	-0.418791	0.120142	19.018	22.2154	18.0373	20.147	19.9202	20.46
slr0038	Slr0038	Slr0038 protein	132	15.24	1	1	9.1	2	0	7.3913	-0.419793	0.209507	18.8118	19.0984	21.2081	20.2925	19.771	20.3142
slr0559	NatB	Periplasmic binding protein of ABC transporter for natural amino acids	454	46.672	1	4	14.3	12	0	50.035	-0.437205	0.0881471	22.8712	22.8891	17.8918	21.8935	22.5261	20.5441
ssr2857	Ssr2857	Ssr2857 protein	64	6.6855	1	1	17.2	4	0	10.918	-0.44071	0.139758	18.436	19.2081	21.8612	19.5919	19.9065	21.329
slr2023	FabD	Malonyl CoA-acyl carrier protein transacylase	293	31.49	1	2	5.8	4	0	13.516	-0.442109	0.116048	18.3797	22.1153	17.9278	19.5767	19.4663	20.7061
sll1306	Sll1306	Sll1306 protein	335	38.27	1	3	9.3	7	0	23.471	-0.447706	0.101037	22.9021	22.7199	18.297	22.5167	21.9748	20.7706
slr0659	PrlC	oligopeptidase A	713	80.296	1	4	6.6	9	0	26.987	-0.448082	0.134366	21.6529	19.1957	17.878	20.0033	19.1059	20.9617
slr1838	CcmK3	Carboxysome shell protein CcmK3	103	11.003	1	1	10.7	2	0	8.9736	-0.448757	0.243416	18.7813	19.1504	20.7296	19.4619	19.7255	20.8201
sll1945	Dxs	1-deoxy-D-xylulose-5-phosphate synthase	640	69.327	1	2	3.8	2	0	10.735	-0.452492	0.14527	21.6561	19.3256	17.6809	19.8243	20.1444	20.0514
sll1654	Sll1654	hypothetical protein	136	14.554	1	1	12.5	2	0	19.787	-0.460319	0.188591	18.4771	19.5728	21.5395	20.2535	19.9085	20.8083
slr1600	Slr1600	Slr1600 protein	149	17.13	1	2	12.1	5	0	15.863	-0.465952	0.26628	20.6892	19.3709	21.6917	21.3658	21.0849	20.6991
sll0945	GlgA1	Glycogen synthase 1	477	54.346	1	1	1.9	3	0	6.958	-0.466993	0.4732	19.1161	19.2771	20.2312	19.9592	19.6041	20.462
sll0519	NdhA	NAD(P)H-quinone oxidoreductase subunit 1	372	40.548	1	2	7.5	4	0	62.454	-0.467285	0.0607728	18.1899	24.9646	24.5329	24.5869	19.9862	24.5162
slr1984	Rps1b	30S ribosomal protein S1 homolog B	305	33.795	1	3	9.8	7	0	23.983	-0.4803	0.135945	22.4099	19.2035	22.3708	22.3138	22.7891	20.3222
slr0661	ProC	Pyrroline-5-carboxylate reductase	267	27.883	1	1	3.4	1	0.0015291	6.4096	-0.481371	0.143582	21.7195	18.939	17.7919	19.6817	19.397	20.8159
slr0453	Slr0453	hypothetical protein	821	92.447	1	14	20.3	38	0	103.83	-0.485817	0.862378	23.7837	24.3054	24.6275	24.6881	24.5894	24.8964
slr1407	Slr1407	Slr1407 protein	289	32.018	1	1	3.8	1	0	7.0297	-0.49219	0.273389	19.0131	19.6531	21.0031	20.1346	19.8086	21.2028
ssl2296	Ssl2296	Putative pterin-4-alpha-carbinolamine dehydratase	96	10.734	1	4	77.1	42	0	280.54	-0.494065	0.439646	28.3789	29.6911	29.1512	29.3975	29.1625	30.1433
sll1553	PheT	Phenylalanine--tRNA ligase beta subunit	810	87.887	1	3	3.6	3	0	19.149	-0.494777	0.138927	22.4933	19.3659	18.1279	20.4718	20.1234	20.8762
sll0039	Sll0039	CheY subfamily	119	13.181	1	3	32.8	7	0	20.291	-0.496712	0.231157	18.6389	19.1474	20.7025	19.7706	19.1358	21.0725
slr0161	PilT	Twitching motility protein	369	40.615	1	2	7	3	0	14.597	-0.516655	0.32119	19.0578	18.8158	20.6639	19.9991	19.5	20.5884
sll1089	Sll1089	Sll1089 protein	213	23.491	1	3	15	4	0	20.688	-0.525848	0.144804	18.7385	21.9862	17.7579	20.1825	19.2051	20.6726
sll0172	Sll0172	Sll0172 protein	152	16.347	1	2	17.1	5	0	16.803	-0.531422	0.150343	22.1081	19.5047	17.6446	20.0318	20.0418	20.7781
sll1308	Sll1308	Sll1308 protein	248	25.861	1	2	9.7	1	0	12.264	-0.536826	0.294309	18.6694	19.034	20.7965	20.0632	19.4373	20.6098
slr1239	PntA	proton-translocating NAD(P)(+) transhydrogenase	530	56.049	1	1	2.1	3	0	6.9831	-0.53842	0.468394	18.6509	19.3834	20.0419	19.4368	19.8117	20.443
sll1796	PetJ	Cytochrome c6	120	12.463	1	1	7.5	5	0	15.162	-0.541411	0.173169	18.1475	19.1618	22.039	20.1973	20.0452	20.73
slr1665	DapF	Diaminopimelate epimerase	279	30.096	1	1	3.9	4	0	10.736	-0.546691	0.371748	18.627	19.2268	20.6885	19.9513	20.1824	20.0486
slr0737	PsaD	Photosystem I reaction center subunit II	141	15.644	1	11	57.4	57	0	134.37	-0.553934	2.21053	29.2519	29.2443	29.5578	29.8917	29.8827	29.9415
slr0942	Slr0942	Aldo/keto reductase slr0942	327	36.014	1	1	4	5	0	13.012	-0.557965	0.316701	18.4908	19.1038	20.6026	19.9058	19.3679	20.5974
ssl3441	Ssl3441	initiation factor IF-1	67	7.736	1	2	17.9	4	0	10.844	-0.558488	0.163855	18.6871	21.8599	17.9964	19.7814	19.4273	21.0102
sll0577	Sll0577	Sll0577 protein	169	17.839	1	1	8.9	4	0	11.312	-0.559366	0.260283	18.6029	18.6094	21.0201	19.5871	19.7788	20.5445
slr0067	Mrp	Iron-sulfur cluster carrier protein	353	37.131	1	2	7.4	2	0	10.435	-0.5609	0.276149	18.0134	19.7726	20.5936	19.7763	19.6808	20.6052
sll0395	Sll0395	Sll0395 protein	212	23.752	1	9	35.8	38	0	80.387	-0.561559	0.931617	24.6777	25.1529	25.5847	25.5203	25.6996	25.88
slr1857	GlgX	1,4-alpha-glucan branching enzyme	707	79.894	1	2	2.4	3	0	11.23	-0.567183	0.305979	18.8159	19.1139	20.9147	19.6928	19.9353	20.918
sll1745	RplJ	50S ribosomal protein L10	173	18.675	1	3	18.5	4	0	19.577	-0.576322	0.112378	18.717	23.6094	23.0722	20.3224	23.4707	23.3344
sll1824	Sll1824	50S ribosomal protein L25	118	13.442	1	5	42.4	17	0	43.574	-0.584037	1.72216	23.8143	24.1831	24.2531	24.5409	24.6768	24.785
sll1260	RpsB	30S ribosomal protein S2	269	30.15	1	12	37.2	41	0	100.35	-0.584965	1.58341	26.0622	26.0402	26.4547	26.7361	26.6118	26.9642
slr2024;chr1_34160	Slr2024	CheY subfamily	180;203	20.233	2	2;2	11.1	5	0	11.57	-0.590858	0.406467	18.5871	19.3513	20.6504	20.2474	19.8556	20.2584
slr0477	PurN	Phosphoribosylglycinamide formyltransferase	217	23.538	1	2	10.6	2	0	15.183	-0.591154	0.25755	20.9887	19.1668	18.2646	19.3348	20.0095	20.8493
sll0470	Sll0470	Sll0470 protein	186	20.719	1	1	7.5	6	0	7.8482	-0.591409	0.662614	18.5675	19.04	19.7761	19.6889	19.3895	20.0795
slr1945	GpmI	2,3-bisphosphoglycerate-independent phosphoglycerate mutase	532	57.981	1	2	3.6	3	0	12.718	-0.599825	0.309869	18.2697	19.9258	20.8928	19.9639	20.2904	20.6336
ssl1498	Ssl1498	Ssl1498 protein	61	6.3993	1	1	14.8	5	0	6.9716	-0.601831	0.309231	18.4527	19.4391	21.1042	19.9338	20.3256	20.5421
slr2072	IlvA	L-threonine dehydratase	508	56.545	1	7	18.3	27	0	64.222	-0.601913	0.827365	21.8451	22.6271	22.875	23.1923	22.7874	23.1732
sll0819	PsaF	Photosystem I reaction center subunit III	165	18.249	1	10	57.6	68	0	183.07	-0.60512	2.36161	29.0122	29.2816	29.025	29.8137	29.6213	29.6991
ssr1604	RpmB	50S ribosomal protein L28	78	8.9934	1	7	53.8	16	0	43.266	-0.609402	1.85684	23.966	24.1307	24.1672	24.716	24.4601	24.9161
sll1172	ThrC	Threonine synthase	382	40.414	1	1	2.4	2	0	7.3029	-0.612119	0.619125	19.0502	19.5777	20.3576	19.9414	20.1632	20.7172
sll1058	DapB	4-hydroxy-tetrahydrodipicolinate reductase	275	29.09	1	2	8	5	0	13.066	-0.612642	0.162678	19.022	22.2919	17.5828	20.0918	19.9035	20.7394
slr0637	Slr0637	Slr0637 protein	261	29.017	1	2	9.6	2	0	11.166	-0.617188	0.247569	21.0158	19.7455	17.6346	20.0243	20.0991	20.1241
ssr2799	RpmA	50S ribosomal protein L27	87	9.4485	1	3	31	13	0	24.269	-0.621863	1.71999	23.2614	23.4732	23.7444	23.9724	24.1062	24.266
slr0370	GabD	Probable succinate-semialdehyde dehydrogenase [NADP(+)]	454	48.748	1	2	4.2	1	0	11.229	-0.632232	0.202139	21.6477	18.9385	17.6441	19.9405	19.6661	20.5205
sll0019	Dxr	1-deoxy-D-xylulose 5-phosphate reductoisomerase	394	42.532	1	1	2.8	3	0	6.9229	-0.637278	0.633763	18.9635	19.5289	20.0985	19.9243	19.7895	20.7889
ssr0692	Ssr0692	Ssr0692 protein	51	5.8506	1	2	21.6	1	0	10.691	-0.637433	0.137204	18.012	22.675	17.4711	19.8418	19.3256	20.9029
sll0319	Sll0319	Sll0319 protein	297	32.315	1	1	3.7	1	0	7.328	-0.641254	0.48758	18.684	19.1345	20.1641	19.6869	19.5197	20.6998
sml0006	RpmJ	50S ribosomal protein L36	38	4.4555	1	1	26.3	6	0	8.0669	-0.649125	0.568243	18.7312	19.2225	20.1689	19.8773	19.6236	20.5691
sll1823	Sll1823	adenylosuccinate synthetase	443	48.679	1	2	4.3	1	0	15.553	-0.654593	0.220985	21.5283	19.1074	17.569	20.0066	19.9514	20.2105
slr1826	Slr1826	hypothetical protein	130	14.322	1	1	7.7	4	0	8.1381	-0.667786	0.355244	18.4846	19.2318	20.4759	19.6835	19.4111	21.101
sll1810	RplF	50S ribosomal protein L6	179	19.666	1	9	62.6	49	0	148.71	-0.670661	2.16289	25.4889	25.5487	25.5612	26.0071	26.157	26.4467
sll0185	Sll0185	Sll0185 protein	419	46.993	1	2	4.5	6	0	14.515	-0.682136	0.383488	18.8187	18.8339	20.8953	20.0976	19.7532	20.7434
slr2049	CpcS2	Chromophore lyase CpcS/CpeS 2	192	21.946	1	1	5.7	4	0	9.1806	-0.68373	0.44615	18.6897	19.5802	20.5008	20.3418	19.5482	20.9319
sll1282	RibH	6,7-dimethyl-8-ribityllumazine synthase	164	17.617	1	2	13.4	11	0	14.584	-0.684003	2.29693	21.6686	21.5098	21.3571	22.0458	22.2087	22.3331
slr0201	HdrB	Heterodisulfide reductase subunit B	301	32.571	1	1	5	1	0	8.0403	-0.686958	0.643681	19.0678	19.1872	20.407	19.8853	20.1893	20.6481
sll1733	NdhD3	NADH dehydrogenase subunit 4	502	54.346	1	1	2.6	2	0	12.74	-0.68954	0.245732	18.5094	21.6167	18.2391	20.3582	19.6702	20.4055
slr0435	AccB	Biotin carboxyl carrier protein of acetyl-CoA carboxylase	154	16.313	1	1	5.2	3	0	6.7018	-0.692142	0.515648	18.8864	19.0816	20.6599	20.2332	19.928	20.5431
sll1783	Sll1783	Uncharacterized protein sll1783	147	16.822	1	1	8.8	4	0	12.63	-0.695235	0.466384	18.5164	19.3692	20.236	20.0704	19.3554	20.7815
sll0048	Sll0048	Sll0048 protein	312	34.866	1	1	2.6	1	0.0029112	5.9031	-0.695971	0.479402	18.7268	19.0116	20.6304	19.8881	19.9911	20.5775
slr0965	DnaN	Beta sliding clamp	391	42.087	1	3	9.2	4	0	24.561	-0.700426	0.310434	20.83	19.417	17.662	19.8689	19.9604	20.181
sll0144	PyrH	Uridylate kinase	260	27.651	1	1	4.2	3	0	8.4392	-0.70324	0.47159	18.6229	19.179	20.4062	19.8979	19.5876	20.8323
slr0940	CrtQ	Zeta-carotene desaturase	489	54.369	1	3	5.9	5	0	20.653	-0.703344	0.223568	21.6358	18.8565	17.7939	19.8818	19.5187	20.9957
sll1804	RpsC	30S ribosomal protein S3	240	27.147	1	15	63.8	63	0	128.09	-0.705957	2.54597	25.978	26.029	26.2756	26.771	26.7192	26.9102
sll0601	Nit1	Deaminated glutathione amidase	272	30.191	1	2	9.2	6	0	12.207	-0.714362	0.325708	18.6427	19.0322	21.2905	20.0782	19.9409	21.0893
slr1437	Slr1437	Slr1437 protein	112	12.671	1	1	11.6	2	0.0086455	5.796	-0.717983	0.368268	18.8897	20.7583	18.1507	19.5788	19.9321	20.4418
sll1812	RpsE	30S ribosomal protein S5	173	18.241	1	13	76.3	59	0	155.95	-0.718562	1.98404	26.767	26.7236	27.0337	27.4815	27.3948	27.8038
sll1380	Sll1380	Sll1380 protein	214	23.884	1	2	10.3	4	0	14.708	-0.719046	0.691847	18.8626	19.1193	20.1081	19.9399	19.6801	20.6271
sll0320	Rnd	Ribonuclease D	217	24.403	1	1	5.1	6	0	9.0554	-0.724226	0.328364	18.5055	19.029	21.0907	19.9474	19.7	21.1506
slr2001	CphB	Cyanophycinase	271	29.389	1	2	11.1	6	0	25.221	-0.726183	0.389394	18.5708	18.9102	20.9996	20.0227	20.0093	20.6272
slr1356	Rps1A	30S ribosomal protein S1 homolog A	328	36.57	1	12	30.5	55	0	108.64	-0.727649	2.12051	25.7435	25.8972	25.9671	26.4033	26.5429	26.8446
slr0434	Efp	Elongation factor P	187	20.406	1	5	28.3	25	0	45.195	-0.727676	1.01217	24.4214	25.3959	25.3737	25.9068	25.5854	25.8819
sll1769	Sll1769	Thylakoid protein sll1769	105	11.558	1	1	8.6	5	0	7.3159	-0.729362	0.312143	18.3175	19.2306	21.2254	20.112	19.7254	21.124
ssl1918	Ssl1918	Ssl1918 protein	97	11.332	1	1	7.2	5	0	7.0566	-0.735678	0.353365	20.8169	19.6814	17.9478	19.7886	20.2849	20.5796
slr0058;chr1_114476	Slr0058	Slr0058 protein	142;148	16.485	2	2;2	15.5	6	0	16.283	-0.740483	0.393076	18.4208	19.3799	21.0485	20.2183	20.0872	20.7651
slr1938	MtnA	Methylthioribose-1-phosphate isomerase	351	38.281	1	1	2.8	2	0.0015198	6.3198	-0.745817	0.32799	18.9358	20.6009	17.6301	19.4598	19.4064	20.5381
slr1884	TrpS	Tryptophan--tRNA ligase	337	37.763	1	16	35.6	71	0	165.78	-0.746361	0.765197	26.287	27.074	27.6411	27.4358	27.6391	28.1662
slr0073	Slr0073	Sensory transduction histidine kinase	315	35	1	1	2.5	4	0	6.7822	-0.747936	0.387741	18.2315	19.363	20.6859	20.1704	19.4894	20.8643
slr0809	RfbB	UDP-glucuronate decarboxylase	328	36.942	1	1	2.4	4	0	6.7822	-0.756356	0.415732	18.7511	19.1922	21.0689	20.1346	20.1049	21.0418
slr0823	Ycf3	Photosystem I assembly protein Ycf3	173	19.878	1	2	12.1	6	0	16.416	-0.764033	0.212097	18.9938	22.3144	17.9171	21.3045	19.7509	20.4621
chr1_309173	Chr1_309173	Hypothetical protein [179192 - 179139]	18	1.9663	1	1	55.6	5	0	7.2674	-0.766031	0.345875	18.6791	18.6517	21.3437	20.2154	20.021	20.7362
slr0156	ClpB1	Chaperone protein ClpB 1	898	101.39	1	1	4.2	2	0.0057803	5.8192	-0.766062	0.822427	18.8842	18.9601	19.8383	19.914	19.5112	20.5555
slr1649	CpcT	Chromophore lyase CpcT/CpeT	196	22.578	1	2	11.7	1	0	10.579	-0.768709	0.247762	18.5575	21.6724	17.8718	20.4539	19.3899	20.5641
slr0404	Slr0404	Slr0404 protein	333	34.864	1	2	8.7	3	0	19.232	-0.770624	0.3908	20.4304	19.6173	17.7869	20.0971	19.5343	20.515
sll0712	CysM	Cysteine synthase	325	34.734	1	1	3.1	5	0	12.369	-0.771652	0.480431	18.3402	19.3308	20.483	19.9174	19.7583	20.7932
ssl0601	RpsU	30S ribosomal protein S21	60	7.3414	1	6	60	18	0	50.579	-0.773462	1.42535	24.8438	24.7411	24.8597	25.1828	25.5385	26.0437
sll0065	IlvH	Acetolactate synthase small subunit	172	18.871	1	1	4.1	1	0.002924	5.9439	-0.779628	0.750978	18.9932	19.3847	20.3638	20.1639	20.0646	20.8519
sll0455	Hom	Homoserine dehydrogenase	433	45.486	1	1	2.8	1	0	9.1479	-0.789387	1.00747	18.7121	19.3945	19.251	19.561	19.6518	20.513
slr2005	Slr2005	Slr2005 protein	261	27.975	1	2	8.8	0	0	12.221	-0.799053	0.439408	18.5367	18.8893	20.7498	19.9606	19.6966	20.9159
sll0902	ArgF	Ornithine carbamoyltransferase	308	33.616	1	2	5.8	3	0	13.504	-0.817438	0.256647	18.7233	21.9552	17.9042	20.3819	19.8543	20.7988
slr0657	LysC	aspartate kinase	600	63.533	1	1	1.8	1	0	7.1968	-0.824763	1.30959	19.1813	19.3736	19.5642	20.0337	19.8279	20.7318
slr1159	PurD	Phosphoribosylamine--glycine ligase	419	44.016	1	1	2.9	2	0	9.1459	-0.830908	0.717737	18.6544	19.0275	20.2375	19.8262	20.005	20.5809
slr1322	Slr1322	Metalloprotease slr1322	489	53.129	1	1	2	3	0	7.0332	-0.839357	0.469474	18.6066	18.8994	20.683	20.0138	19.641	21.0523
slr1540	Slr1540	Slr1540 protein	311	35.092	1	1	4.5	2	0.001506	6.208	-0.839472	0.512086	18.3775	18.8229	20.6306	19.858	19.972	20.5195
slr1934	PdhA	Pyruvate dehydrogenase E1 component subunit alpha	342	38.158	1	2	6.4	4	0	15.595	-0.850897	0.452133	18.0864	19.1917	20.8066	19.9274	20.1585	20.5515
slr1970	Slr1970	Slr1970 protein	173	19.451	1	1	4.6	3	0	7.1741	-0.87146	0.430768	18.5119	20.6261	17.9417	20.0358	19.3475	20.3108
sll1806	RplN	50S ribosomal protein L14	122	13.294	1	6	47.5	40	0	61.697	-0.873663	1.70427	25.1402	24.9919	25.3297	25.8275	25.8064	26.4489
slr0220	GlyS	Glycine--tRNA ligase beta subunit	722	80.05	1	2	2.5	3	0	10.63	-0.87416	0.542623	20.2389	19.0493	18.1134	20.277	19.2986	20.4484
sll1244	RplI	50S ribosomal protein L9	152	16.641	1	7	46.7	38	0	101.21	-0.878932	2.82373	26.2757	26.3438	26.4933	27.149	27.1637	27.4369
slr1900	Slr1900	Slr1900 protein	247	27.406	1	1	4.5	3	0	9.1873	-0.87956	0.580688	18.4019	19.5864	20.5824	20.1199	20.2046	20.885
slr1139	Slr1139	Thioredoxin-like protein slr1139	109	12.171	1	1	7.3	0	0.0029326	6.0024	-0.880081	0.67785	19.0741	18.7001	20.3271	19.9874	19.8603	20.8938
sll1679	HhoA	Putative serine protease HhoA	394	41.336	1	1	2.3	0	0.0015175	6.3055	-0.88215	0.966501	18.7772	19.4676	19.14	19.9357	19.396	20.6995
slr1417	Slr1417	Uncharacterized protein slr1417	118	12.929	1	1	8.5	1	0	6.7497	-0.884202	0.721703	18.8723	18.8157	19.8336	19.911	19.3577	20.9056
sll0289	MinD	Septum site-determining protein MinD	266	29.047	1	1	4.9	4	0	8.8864	-0.884408	1.15005	18.9066	19.163	19.3586	19.7249	19.6563	20.7002
slr1615	RfbE	Perosamine synthetase	378	41.944	1	3	5.8	9	0	17.7	-0.885052	1.27002	20.8936	20.9534	21.4749	21.9302	21.5592	22.4877
slr0039	Slr0039	Uncharacterized protein slr0039	357	38.418	1	1	2.5	2	0.0015314	6.4108	-0.885232	0.802664	18.746	19.3524	19.9103	19.6807	20.0214	20.9624
sll0158	GlgB	1,4-alpha-glucan branching enzyme GlgB	770	89.526	1	19	31.4	81	0	213.51	-0.888433	2.37185	26.6724	26.8877	27.1476	27.6988	27.7591	27.9151
sll0135	Sll0135	putative 5-methylthioadenosine phosphorylase	318	34.483	1	3	12.9	3	0	35.121	-0.891846	0.405841	18.6207	21.0228	18.0564	20.1031	19.7838	20.4885
slr1301	Slr1301	Slr1301 protein	535	61.692	1	1	2.8	1	0	10.351	-0.896295	0.59077	20.0328	19.3329	17.8397	19.836	19.6962	20.3621
sll0923	EpsB	Exopolysaccharide export protein	756	83.64	1	2	2	4	0	12.779	-0.898709	0.457843	20.603	19.2673	17.883	19.6937	19.9954	20.7603
slr0528;chr1_141269	MurE	UDP-N-acetylmuramoyl-L-alanyl-D-glutamate--2,6-diaminopimelate ligase	505;560	54.6	2	1;1	2.4	2	0	8.9993	-0.900422	0.597974	20.1188	19.1789	17.9834	19.8568	19.6131	20.5125
slr1140	Slr1140	3-amino-5-hydroxybenzoic acid synthase	378	41.559	1	11	38.6	38	0	134.28	-0.900717	0.824526	24.3442	25.202	24.9076	25.5192	25.0775	26.5592
slr0245	Slr0245	Uncharacterized protein slr0245	304	33.649	1	2	6.6	2	0	15.269	-0.907007	0.534203	18.7739	18.7037	20.6363	19.8718	19.8854	21.0777
sll0495	Sll0495	asparaginyl-tRNA synthetase	513	58.045	1	1	1.8	1	0.0015337	6.4192	-0.910684	1.02263	19.0113	19.6115	18.449	19.9641	19.4889	20.3508
sll1891	Sll1891	Sll1891 protein	252	26.435	1	1	5.2	5	0	9.6436	-0.910705	0.615933	18.229	19.473	20.222	19.8512	19.9462	20.8587
sll1096	RpsL	30S ribosomal protein S12	126	14.176	1	6	48.4	25	0	113.39	-0.911131	2.06866	26.1993	26.5106	26.7659	27.2243	27.439	27.5458
ssl1911	Ssl1911	Ssl1911 protein	65	7.4753	1	1	16.9	2	0	10.596	-0.913073	0.698502	18.9758	18.9404	20.656	20.2356	20.267	20.8089
ssl3335	SecE	Protein translocase subunit SecE	81	9.1335	1	2	39.5	3	0	11.797	-0.917478	0.765891	18.7097	18.9309	20.2575	20.2731	19.7317	20.6457
sll1362	IleS	Isoleucine--tRNA ligase	988	112.34	1	3	5.6	3	0	20.828	-0.92329	0.575052	20.3854	19.2731	17.9938	19.7953	20.2087	20.4182
slr2144	Slr2144	Slr2144 protein	301	33.503	1	2	6.6	4	0	12.327	-0.927588	0.372071	21.099	19.1633	17.7263	20.6511	19.5216	20.5987
sll1358	Sll1358	Sll1358 protein	394	43.15	1	1	3	3	0	7.4019	-0.933097	0.999252	18.6951	19.4216	19.8395	20.0891	19.8638	20.8026
sll1270	GlnH/glnP	Glutamine-binding periplasmic protein/glutamine transport system permease protein	530	57.68	1	1	2.8	2	0	13.776	-0.934516	0.55569	20.3642	18.9891	18.0905	19.6936	19.7853	20.7684
sll1626	LexA	Transcription regulator LexA	203	22.744	1	2	8.4	3	0	12.749	-0.937889	0.360431	18.9799	20.8273	17.3736	19.8039	19.3771	20.8134
slr1233	FrdA	succinate dehydrogenase	575	63.701	1	4	7.1	6	0	29.01	-0.94323	1.18057	18.7474	19.1804	19.4014	20.0924	19.4751	20.5913
sll0899	GlmU	Bifunctional protein GlmU	456	48.923	1	2	4.8	2	0	14.301	-0.943581	0.422792	20.7671	19.3502	17.629	19.983	19.8312	20.7628
slr0171	Ycf37	Ycf37 gene product	175	20.137	1	2	16	2	0	11.178	-0.949907	0.308814	18.7569	21.5461	17.3509	19.9441	19.9262	20.6335
sll1740	RplS	50S ribosomal protein L19	122	13.786	1	6	45.1	31	0	53.716	-0.950507	2.22097	25.1643	25.5566	25.626	26.3564	26.2409	26.6012
slr0084	HisH	Imidazole glycerol phosphate synthase subunit HisH	210	22.497	1	1	3.3	1	0.002963	6.1038	-0.95668	0.539122	18.3338	19.2414	20.234	19.7607	19.5792	21.3393
sll0136	PepP	Aminopeptidase P	441	49.5	1	2	5.2	3	0	13.384	-0.960744	0.338786	21.3544	19.0484	17.635	20.412	19.4878	21.0202
slr1470	Slr1470	Slr1470 protein	131	14.902	1	1	6.9	5	0	6.657	-0.960888	0.587507	18.4438	19.1296	19.9321	19.6634	19.4235	21.3014
slr1898	ArgB	Acetylglutamate kinase	297	31.525	1	1	4	2	0	8.7149	-0.964552	0.783638	18.6803	19.0321	19.8505	19.8038	19.6084	21.0444
slr0943	Fda	Fructose-bisphosphate aldolase class 1	300	33.149	1	2	8	2	0	13.485	-0.973622	0.92667	18.4892	18.864	19.4697	20.0421	19.168	20.5336
slr2097	GlbN	Group 1 truncated hemoglobin GlbN	124	13.867	1	1	10.5	3	0	12.687	-0.974554	0.357827	18.4111	21.4538	18.0587	20.1873	19.7229	20.9371
sll0422	Sll0422	Isoaspartyl peptidase/L-asparaginase	329	34.894	1	3	11.9	8	0	23.618	-0.97629	0.311046	21.6957	19.3037	17.3537	19.9168	20.6428	20.7224
slr0280	Slr0280	Slr0280 protein	610	65.405	1	1	1.8	2	0	8.6702	-0.980753	2.06395	18.9247	18.9905	19.086	19.6404	19.9742	20.3288
slr2136	IspG	4-hydroxy-3-methylbut-2-en-1-yl diphosphate synthase (ferredoxin)	403	44.175	1	2	4.5	4	0	13.083	-0.985228	0.574919	18.3174	20.3449	18.3621	19.8321	19.453	20.695
sll0753	FolD	Bifunctional protein FolD	294	30.943	1	2	5.4	2	0	12.339	-0.988511	0.914544	19.5053	19.5851	18.1535	19.6779	20.3073	20.2242
ssl2982	RpoZ	DNA-directed RNA polymerase subunit omega	76	8.7367	1	1	14.5	1	0	7.0869	-1.00678	0.526605	20.3829	19.5079	17.7828	20.422	19.5485	20.7234
sll1825	Sll1825	hypothetical protein	196	20.301	1	1	6.1	5	0	7.7008	-1.01245	1.19336	18.7919	19.3993	19.9589	20.2517	20.1202	20.8155
sll1184	PbsA1	Heme oxygenase 1	240	27.05	1	2	10	1	0	12.443	-1.02505	0.91754	18.6801	18.9636	19.6683	19.6561	19.741	20.99
slr1718	ComB	Probable 2-phosphosulfolactate phosphatase	241	26.045	1	2	9.5	4	0	13.483	-1.02869	0.467661	18.3037	18.8101	20.6716	19.7026	19.6333	21.5357
sll0553	Sll0553	hypothetical protein	306	33.806	1	1	3.3	2	0	6.8124	-1.03318	1.20909	18.9005	19.5063	19.387	20.0934	19.8088	20.9911
sll5080	Sll5080	Non-heme chloroperoxidase	274	30.078	1	1	4.4	2	0	7.0686	-1.03811	0.721718	18.9438	19.7915	17.9133	20.0398	19.2261	20.4969
slr0738	TrpE	Anthranilate synthase component 1	508	57.146	1	1	1.8	4	0	7.2622	-1.04373	0.937539	18.8169	19.1179	20.1343	19.8666	20.3161	21.0175
slr1678	RplU	50S ribosomal protein L21	124	13.669	1	10	69.4	41	0	157.93	-1.04681	1.41922	25.7889	26.5266	26.7045	27.0977	27.2961	27.7666
sll0042	Tar	Methyl-accepting chemotaxis protein II	163	17.707	1	1	4.3	1	0.0029369	6.0177	-1.05484	0.402945	20.8805	19.3984	17.2349	20.23	19.6508	20.7977
slr0677	Slr0677	Putative biopolymer transport protein ExbB-like 2	227	25.074	1	1	3.1	1	0.0014859	6.119	-1.05494	0.693079	18.3665	18.9164	20.4087	19.8771	20.0424	20.9369
ssr3402	Ssr3402	Uncharacterized protein ssr3402	96	10.673	1	1	10.4	2	0.0029499	6.0636	-1.05788	1.24498	18.8128	19.4845	19.1658	19.7377	20.0071	20.8919
slr1102	Slr1102	Slr1102 protein	853	96.638	1	31	35.8	141	0	323.31	-1.05807	1.45945	27.0221	27.3185	28.0203	28.3029	28.4056	28.8266
sll0220	GlmS	Glutamine--fructose-6-phosphate aminotransferase [isomerizing]	631	69.606	1	2	3.3	2	0	13.153	-1.06297	0.758338	20.0538	19.3459	17.975	20.0324	19.9322	20.599
slr2123	Slr2123	D-isomer specific 2-hydroxyacid dehydrogenase family	318	34.328	1	1	3.5	1	0	7.4798	-1.06913	1.72485	18.8188	19.158	19.2965	19.9632	19.8767	20.6408
slr1796	Slr1796	Thylakoid membrane protein slr1796	201	22.968	1	1	3.5	0	0.0029197	5.9331	-1.06925	1.29012	18.6489	19.181	19.4293	19.9772	19.7252	20.7646
slr1338	Slr1338	Slr1338 protein	200	22.438	1	1	4	3	0.0015129	6.2316	-1.07658	0.803588	18.4389	19.1415	20.4356	20.4519	20.0447	20.7492
sll0735	Sll0735	Sll0735 protein	529	62.075	1	3	5.5	6	0	18.234	-1.07841	0.379318	21.6777	18.9566	18.2148	21.5616	19.6373	20.8855
slr0879	GcvH	Glycine cleavage system H protein	132	14.58	1	1	7.6	3	0	7.2191	-1.08293	1.25443	18.7488	19.1806	19.1333	19.9575	19.5286	20.8254
sll1841	OdhB	Dihydrolipoamide acetyltransferase component of pyruvate dehydrogenase complex	433	44.898	1	3	13.6	7	0	30.605	-1.085	0.245233	23.136	19.7123	17.4871	20.128	22.1995	21.2628
sll0757	PurF	Amidophosphoribosyltransferase	495	53.67	1	3	8.1	5	0	22.741	-1.08897	0.740045	18.4144	19.1771	20.2748	19.9746	19.9709	21.1877
slr0213	GuaA	GMP synthase [glutamine-hydrolyzing]	542	61.008	1	1	1.8	3	0	7.9367	-1.09239	1.32802	19.2197	18.9437	19.6388	20.3913	19.7771	20.911
sll1043	Pnp	Polyribonucleotide nucleotidyltransferase	718	77.83	1	38	52.6	168	0	323.31	-1.09718	2.27721	27.4649	27.5236	28.0105	28.6834	28.6476	28.9594
slr1628	Slr1628	Slr1628 protein	134	14.545	1	1	6	1	0.0014903	6.1266	-1.10008	1.39732	18.5989	19.3077	19.5426	20.3693	19.8	20.5802
ssl2874	Ssl2874	Putative regulatory protein ssl2874	89	9.8693	1	2	15.7	10	0	18.198	-1.10077	0.534868	22.0311	19.1554	21.4645	21.5481	22.2854	22.1198
sll1056;chr1_313425	PurL	Phosphoribosylformylglycinamidine synthase subunit PurL	768;781	81.831	2	1;1	2.5	1	0	7.8368	-1.10694	1.09591	19.5752	18.8733	18.2661	19.8157	19.6423	20.5775
sll0487	Sll0487	Sll0487 protein	402	45.847	1	1	2	1	0.002907	5.895	-1.1119	0.961276	19.4302	19.5181	18.1485	20.2187	19.5702	20.6438
sll1811	RplR	50S ribosomal protein L18	120	13.204	1	5	39.2	29	0	106.54	-1.11207	1.66756	25.8237	26.0455	26.5456	26.8303	27.3752	27.5455
sll0920	Ppc	Phosphoenolpyruvate carboxylase	1034	118.94	1	1	1.3	2	0	7.5678	-1.11866	0.836468	19.7506	19.2696	17.9645	19.4965	20.2993	20.545
sll1071	Sll1071	Sll1071 protein	275	30.532	1	1	3.3	1	0.0015244	6.3331	-1.12833	0.944111	18.23	19.0104	19.7239	20.2371	19.449	20.6631
slr0731	Slr0731	Slr0731 protein	402	44.716	1	1	2.5	3	0	7.2674	-1.13114	1.14752	18.7332	18.9634	19.5111	20.666	19.3997	20.5353
slr1434	PntB	NAD(P) transhydrogenase subunit beta	480	49.943	1	1	2.1	1	0	6.7996	-1.13321	1.23347	18.5008	19.4838	19.4688	19.923	20.0863	20.8436
sll1101	RpsJ	30S ribosomal protein S10	105	12.037	1	10	72.4	30	0	100.97	-1.14938	1.83381	25.3141	25.9939	25.8303	26.5063	26.9256	27.1545
slr1510	PlsX	Phosphate acyltransferase	348	37.285	1	1	2.9	1	0	7.1896	-1.15139	1.49152	18.7846	19.2324	19.2816	19.7361	20.1774	20.8393
sll1961	Sll1961	hypothetical protein	343	38.078	1	1	3.2	3	0	6.9655	-1.17596	1.73703	18.8163	19.2289	18.8168	20.0411	19.7081	20.6407
sll1641	Gad	Glutamate decarboxylase	467	53.041	1	1	1.9	1	0	6.5747	-1.17597	0.743311	19.7978	19.2861	17.7057	20.0103	19.5331	20.7741
sll1537	Sll1537	Sll1537 protein	139	15.937	1	1	6.5	0	0.0015267	6.3625	-1.18834	0.588	18.582	20.8258	18.0736	20.1491	19.9309	20.9664
sll0936	Sll0936	Uncharacterized protein sll0936	501	55.201	1	1	1.4	1	0.008658	5.8016	-1.19175	0.784157	19.5699	19.4333	17.6895	19.7599	19.7119	20.7962
slr0952	Fbp	Fructose-1,6-bisphosphatase class 1	347	38.262	1	2	6.1	5	0	13.047	-1.20685	0.617899	20.2433	19.0847	17.5325	19.6153	19.9457	20.9201
sll0461	ProA2	Gamma-glutamyl phosphate reductase 2	420	45.772	1	1	3.3	1	0	7.7689	-1.20775	0.889866	19.6084	19.2198	17.7269	19.8159	19.7697	20.5928
sll1813	RplO	50S ribosomal protein L15	147	15.194	1	7	57.1	37	0	113.05	-1.2154	2.62587	24.9343	25.0291	25.4408	26.346	26.2049	26.4995
sll1800	RplD	50S ribosomal protein L4	210	23.356	1	7	40.5	36	0	145.78	-1.21547	1.95037	27.4899	27.2158	27.9385	28.64	28.5445	29.106
sll1390	Sll1390	Sll1390 protein	249	27.394	1	2	7.2	5	0	15.425	-1.22205	0.517128	18.7893	21.1336	17.7571	20.0224	20.3505	20.9733
sll1750;chr1_292135	UreC	Urease subunit alpha	569;587	61.037	2	1;1	2.5	5	0	7.4999	-1.22839	0.935754	18.2753	18.6044	20.1243	19.9034	20.1144	20.6713
sll1808	Sll1808	50S ribosomal protein L5	200	22.508	1	13	57.5	61	0	119.56	-1.23901	1.82272	26.2439	26.6071	27.0519	27.6484	27.7131	28.2584
slr0399	Ycf39	Ycf39 gene product	326	36.519	1	2	6.4	2	0	12.94	-1.24228	0.695406	19.9391	19.261	17.5028	19.7762	19.7741	20.8794
slr0398	Slr0398	unknown protein	157	17.633	1	1	6.4	2	0	6.4964	-1.25344	0.907613	18.6145	18.7979	20.3707	20.072	20.3265	21.145
sll1530	Sll1530	Sll1530 protein	386	43.745	1	2	6.5	3	0	18.631	-1.25666	1.54347	18.3922	19.0198	19.4142	19.9788	19.9614	20.6559
slr1702	Slr1702	Slr1702 protein	251	27.287	1	1	5.2	2	0.0015221	6.3307	-1.25717	1.75096	18.2724	19.1679	19.0909	20.1209	19.8314	20.3503
sll0915	PqqE	Protease	524	59.588	1	2	5	2	0	14.128	-1.26076	1.50452	18.6952	19.1656	19.4749	20.2982	19.8692	20.9506
sll1292	Sll1292	CheY subfamily	121	13.685	1	1	9.1	1	0.0015106	6.2297	-1.26101	0.954896	18.5369	19.66	17.6646	19.8645	19.5085	20.2715
sll0381	Sll0381	Sll0381 protein	294	30.985	1	1	4.1	1	0	7.3965	-1.26317	0.973314	19.2101	19.5593	17.7224	20.2024	19.6536	20.4253
sll0086	Sll0086	Putative arsenical pump-driving ATPase	396	44.626	1	1	2.5	1	0	6.8107	-1.28966	1.64753	18.8821	19.4295	18.2216	20.0961	20.2775	20.0285
slr0613	Slr0613	Slr0613 protein	173	18.297	1	1	5.8	2	0	6.7134	-1.30078	2.27401	18.6805	19.383	19.3244	20.5545	20.3032	20.4325
sll1821	RplM	50S ribosomal protein L13	151	16.99	1	10	77.5	55	0	108.38	-1.30295	1.94624	26.3712	27.088	27.1555	27.9661	28.0872	28.4702
slr1842	CysK	Cysteine synthase	312	33.173	1	1	3.5	1	0.0086083	5.7161	-1.30747	0.555024	18.3236	20.6145	17.4345	19.6438	19.676	20.9751
sll0379	Sll0379	acyl-[acyl-carrier-protein]--UDP-N-acetylglucosamine o-acyltransferase	295	32.073	1	1	3.1	1	0	6.5015	-1.31065	1.05784	18.294	19.5228	19.483	20.4603	19.6595	21.112
sll0314	Sll0314	Sll0314 protein	314	35.444	1	1	2.5	1	0.0015152	6.2705	-1.31417	1.38505	18.3027	19.2511	19.6597	20.2969	20.1175	20.7416
sll1430	Apt	Adenine phosphoribosyltransferase	172	18.997	1	1	8.7	0	0	7.3394	-1.32348	0.592758	18.3054	20.7556	17.8564	19.7691	19.9728	21.146
slr0650	Slr0650	Slr0650 protein	201	22.501	1	7	30.8	26	0	52.978	-1.32579	1.79046	23.7234	24.0115	24.6276	25.2449	25.2533	25.8417
slr1192	AdhA	Aldehyde reductase AdhA	336	35.868	1	1	3	2	0	7.0061	-1.32925	0.907359	18.512	20.1298	17.9223	20.3335	19.8278	20.3906
ssr1853	Ssr1853	Ssr1853 protein	95	10.902	1	4	53.7	28	0	79.899	-1.33346	1.765	24.0889	23.7971	24.3541	24.9863	25.2639	25.9902
sll0596	Sll0596	Sll0596 protein	244	26.325	1	9	52.9	31	0	81.647	-1.33555	2.07038	25.1512	25.6996	25.8612	26.5649	27.0124	27.1414
slr0033	GatC	Glutamyl-tRNA(Gln) amidotransferase subunit C	104	11.616	1	2	21.2	4	0	13.673	-1.33579	0.727795	18.3077	20.0634	17.5801	19.5435	19.6228	20.7924
sll0518	Sll0518	Sll0518 protein	385	43.118	1	11	28.6	32	0	95.197	-1.34025	1.68922	23.991	24.1575	24.9218	25.4187	25.5452	26.1272
slr0212	MetH	Methionine synthase	1195	132.54	1	1	1.1	1	0.0086207	5.7416	-1.34033	1.38987	18.6883	19.1415	18.9811	19.6156	20.1329	21.0834
sll1801	RplW	50S ribosomal protein L23	101	11.526	1	9	80.2	53	0	95.528	-1.34467	2.39749	26.1933	26.8757	26.729	27.9364	27.7923	28.1032
ssl3436	RpmC	50S ribosomal protein L29	73	8.5455	1	10	94.5	43	0	164.06	-1.34793	2.21711	26.3472	26.8104	27.048	27.9352	27.933	28.3813
sll7090	Sll7090	CRISPR-associated protein Cmr2 N-terminal domain-containing protein	979	111.43	1	1	0.9	1	0	6.4618	-1.36495	1.27509	18.6495	19.2937	18.5204	19.8927	19.6116	21.0542
sll1181	HlyD	HlyD family of secretion proteins	583	64.707	1	2	3.3	3	0	15.31	-1.36556	0.994054	18.7643	19.6415	17.7744	20.0509	19.5037	20.7223
ssl2717	Ssl2717	Ssl2717 protein	70	7.9208	1	1	20	1	0	7.258	-1.36649	0.736882	20.0266	19.6302	17.5066	20.2537	19.9465	21.0626
sll1744	RplA	50S ribosomal protein L1	238	25.852	1	19	71.8	107	0	300.86	-1.3777	2.07025	27.7113	27.8353	28.4659	29.142	29.3071	29.6965
ssl2233	RpsT	30S ribosomal protein S20	97	10.702	1	8	55.7	55	0	124.2	-1.38382	1.24399	25.5098	27.2418	26.5619	27.6224	27.7565	28.0862
slr5119;sll6076;sll6017;slr5077;sll1201;slr5124;slr5082	Slr5119	Slr5119 protein	256;256;256;260;264;276;276	29.502	7	1;1;1;1;1;1;1	4.3	2	0	8.8191	-1.38621	0.607497	18.8222	20.4711	17.3492	20.2284	19.45	21.1228
slr0146;chr1_97004	Slr0146	Slr0146 protein	170;188	19.69	2	1;1	7.6	2	0	9.3124	-1.39951	0.918772	18.5268	19.7757	17.8938	19.6236	19.7469	21.0243
sll1822	RpsI	30S ribosomal protein S9	137	15.086	1	12	75.9	56	0	275.54	-1.40042	2.77906	27.1122	27.6113	27.5654	28.686	29.0117	28.7923
slr1779	Slr1779	pyridoxal phosphate biosynthetic protein PdxJ	241	26.387	1	2	7.9	1	0	11.674	-1.40145	1.20443	18.5675	19.466	17.9147	19.8265	19.6604	20.6657
slr0535	Slr0535	Serine proteinase	613	65.878	1	1	2	1	0	9.0546	-1.40202	1.62913	18.2774	19.0866	19.3345	20.1202	20.0263	20.758
slr0376	Slr0376	Slr0376 protein	116	12.857	1	7	51.7	30	0	125.46	-1.40245	1.60447	24.3751	25.2732	25.7104	26.4901	26.4074	26.6686
ssr1399	RpsR	30S ribosomal protein S18	71	8.3808	1	9	69	47	0	67.032	-1.40346	1.80077	27.7665	28.8034	28.669	29.6846	29.6978	30.0669
sll2005	GyrB	DNA gyrase subunit B	1078	122.82	1	1	1	2	0	6.9529	-1.40877	1.04222	19.5922	19.182	17.6849	20.0347	19.9089	20.7418
sll1568	Sll1568	Fibrillin	202	22.728	1	1	4.5	2	0	6.4618	-1.41504	1.47078	18.4713	19.021	19.0133	19.9045	19.784	21.0622
sll1803	RplV	50S ribosomal protein L22	121	13.502	1	6	64.5	17	0	71.536	-1.4325	2.14265	24.7411	24.5403	25.2321	25.9953	26.1681	26.6475
sll1633	FtsZ	Cell division protein FtsZ	430	44.773	1	1	3	1	0	7.6315	-1.43281	1.21142	19.0188	19.6526	17.8116	20.136	20.122	20.5235
sll1074	LeuS	Leucine--tRNA ligase	869	98.294	1	2	2.5	2	0	11.918	-1.43688	1.55397	18.7664	19.7712	18.7516	20.2249	20.3255	21.0495
sll0897	DnaJ1	Chaperone protein DnaJ 1	377	40.794	1	2	6.1	2	0	12.822	-1.43813	1.36929	19.1599	19.2371	17.9304	20.448	19.7186	20.4751
sll1687	Sll1687	Sll1687 protein	970	109.82	1	5	4.8	9	0	30.937	-1.4417	0.620957	18.674	19.505	21.8143	20.5532	21.7035	22.0615
slr1962	Slr1962	Extracytoplasmic solute receptor protein	370	40.342	1	1	2.7	2	0	8.6075	-1.44346	1.60115	18.5353	19.3942	18.5028	20.1695	19.7952	20.798
sll0997	Sll0997	hypothetical protein	363	40.674	1	2	7.2	1	0	17.426	-1.45481	1.0533	18.9942	19.39	17.4932	19.944	19.6508	20.6471
slr0301	PpsA	Phosphoenolpyruvate synthase	818	89.928	1	1	1.3	0	0	6.7854	-1.46216	1.2336	19.013	19.3552	17.7633	19.9173	19.8777	20.723
slr0469	RpsD	30S ribosomal protein S4	202	23.183	1	22	72.8	112	0	264.91	-1.48237	2.04209	27.8469	28.49	28.6629	29.4565	29.8833	30.1071
sll1817	RpsK	30S ribosomal protein S11	130	13.762	1	10	60.8	50	0	139.85	-1.50345	2.03421	25.9215	26.3333	26.6568	27.3956	27.8063	28.2201
slr0502	CobW	CobW protein	352	38.955	1	1	3.4	1	0	7.4464	-1.51429	1.07851	19.0967	18.9339	17.4594	19.8805	19.3829	20.7694
sll1097	RpsG	30S ribosomal protein S7	156	17.384	1	10	71.8	86	0	175.89	-1.52789	1.78095	27.6401	27.868	28.4883	29.1129	29.3821	30.0851
sll1802	RplB	50S ribosomal protein L2	276	30.433	1	17	49.6	89	0	177.93	-1.54782	2.37022	27.0409	27.4057	27.6324	28.6129	28.8182	29.2914
ssl3432	RpsS	30S ribosomal protein S19	92	10.29	1	5	57.6	37	0	59.786	-1.56644	1.7852	26.1122	26.8551	27.3198	28.1057	28.2029	28.6777
slr1846	Slr1846	Uncharacterized monothiol glutaredoxin ycf64-like	107	11.94	1	1	10.3	4	0	9.9428	-1.58251	1.61676	18.453	19.2417	18.0173	19.7499	20.0469	20.6627
sll1484	Sll1484	type 2 NADH dehydrogenase	487	52.818	1	1	2.7	2	0	8.9465	-1.59172	1.56539	19.4125	19.0277	17.8958	20.2845	20.2424	20.5843
ssl2598	PsbH	Photosystem II reaction center protein H	64	7.1164	1	1	21.9	12	0	9.8104	-1.61338	0.35843	24.9941	19.4012	25.0575	24.7286	24.7367	24.8278
sll0098	RlmN	Probable dual-specificity RNA methyltransferase RlmN	350	38.856	1	2	6.3	4	0	12.608	-1.62287	0.799702	18.6251	19.3921	21.2309	21.7375	20.3264	22.0528
sll1799	RplC	50S ribosomal protein L3	213	22.741	1	14	51.6	83	0	200.85	-1.62719	2.36585	26.504	26.9159	27.3247	28.3319	28.4684	28.826
sll1021	Sll1021	Flotillin family inner membrane protein sll1021	673	74.423	1	35	47.5	119	0	323.31	-1.64921	0.66383	25.9391	27.4147	26.8006	28.9232	29.8278	26.351
sll1807	Sll1807	50S ribosomal protein L24	105	11.707	1	9	72.4	43	0	141.2	-1.66433	2.10918	25.6418	26.0612	26.7003	27.6215	27.7089	28.0659
slr1870	Slr1870	Slr1870 protein	249	27.693	1	5	22.1	19	0	45.453	-1.67087	1.59048	23.4585	23.8794	24.1765	25.5243	24.7485	26.2543
sll0755	Sll0755	Putative peroxiredoxin sll0755	200	22.509	1	1	3.5	4	0	9.2615	-1.67386	2.14473	18.6161	18.7192	18.2734	19.8814	19.9357	20.8131
sll0767	RplT	50S ribosomal protein L20	117	13.553	1	5	36.8	28	0	89.37	-1.68198	2.85123	25.9951	26.1324	26.4688	27.5795	27.9338	28.129
sll1816	RpsM	30S ribosomal protein S13	127	14.572	1	20	82.7	85	0	220.75	-1.69652	2.32413	27.6127	27.996	28.4593	29.3884	29.8084	29.9609
sll1049	Sll1049	Sll1049 protein	564	63.949	1	1	1.4	1	0.0014925	6.1272	-1.70742	1.29013	18.935	19.2155	17.5508	19.6649	20.2933	20.8654
slr0743	NusA	Transcription termination/antitermination protein NusA	458	51.33	1	1	2.6	1	0.0029412	6.0433	-1.70802	1.22176	19.4704	19.1142	17.5546	20.0536	20.2117	20.998
sll1809	RpsH	30S ribosomal protein S8	133	14.666	1	13	88.7	120	0	199.56	-1.70814	1.94341	28.4013	29.0866	29.5681	30.4137	30.7161	31.0507
sll1767	RpsF	30S ribosomal protein S6	113	13.237	1	8	61.1	49	0	143.55	-1.73167	2.00095	27.2202	28.1902	28.3191	29.4131	29.6011	29.9103
sll1343	Ape2	Aminopeptidase N	869	97.979	1	1	1.3	1	0	6.8997	-1.75496	1.4351	18.6061	19.1426	17.6243	20.089	19.6694	20.8794
slr1691	NadE	Glutamine-dependent NAD(+) synthetase	558	61.075	1	1	2	1	0	7.6529	-1.77292	1.12709	19.0268	19.0018	17.0928	20.0496	19.5598	20.8307
slr1469	RnpA	Ribonuclease P protein component	124	14.498	1	2	16.9	2	0	11.245	-1.78027	1.32851	18.7589	19.223	18.2737	19.9919	19.9444	21.66
slr0226	Slr0226	Slr0226 protein	482	50.848	1	1	2.3	1	0	8.3833	-1.79165	3.4777	18.2232	18.2056	18.2145	19.951	19.7668	20.3005
sll1967	Sll1967	Uncharacterized RNA methyltransferase sll1967	463	51.522	1	9	21.6	34	0	75.988	-1.80283	1.55335	22.7396	23.4886	24.4504	25.0545	25.2917	25.741
slr0929	Slr0929	Slr0929 protein	195	21.699	1	2	8.2	2	0	11.994	-1.80699	1.26256	18.801	19.0061	17.3742	19.6198	19.9346	21.048
sll1443;chr1_232675	Sll1443	CTP synthetase;chr1_232675 Hypothetical protein [1892131 - 1890464]	546;556	60.807	2	1;1	1.5	0	0.0014993	6.1931	-1.80959	1.49183	18.6983	19.1731	17.6529	19.68	20.8276	20.4455
slr0721	Me	Malic enzyme	463	48.699	1	1	3	1	0	10.505	-1.83451	1.40574	19.6058	18.9558	17.7713	20.4045	20.2557	21.1763
ssl1784	RpsO	30S ribosomal protein S15	89	10.373	1	8	69.7	61	0	113.53	-1.83513	1.98031	27.7036	28.281	28.9685	29.9342	30.0333	30.491
ssl3437	RpsQ	30S ribosomal protein S17	81	9.2887	1	12	74.1	102	0	239.99	-1.8646	1.98305	27.8921	28.3938	29.1665	30.0605	30.3231	30.6626
slr1886	RsfS	Ribosomal silencing factor RsfS	154	17.09	1	1	5.2	2	0	6.8225	-1.88073	1.29045	18.7228	18.9595	17.9093	19.8527	19.7615	21.6195
ssr0482	RpsP	30S ribosomal protein S16	82	9.5561	1	8	78	64	0	84.627	-1.89455	1.92408	27.0812	27.5589	28.3506	29.191	29.5178	29.9655
ssr3451	PsbE	Cytochrome b559 subunit alpha	81	9.4485	1	2	25.9	11	0	35.277	-1.95138	0.466422	24.7714	19.4356	24.9357	24.8234	24.9736	25.1999
sll0629	Sll0629	alternative photosystem I reaction center subunit X	128	13.718	1	2	8.6	8	0	14.485	-2.2694	0.561374	22.5532	19.4773	18.1047	19.8774	23.6423	23.4237
slr0808	RimM	Ribosome maturation factor RimM	185	20.715	1	4	16.2	13	0	29.967	-2.56573	0.691937	18.4821	23.4854	23.5858	24.4805	24.1969	24.5731
slr1784	BvdR	Biliverdin reductase	328	36.64	1	7	26.2	23	0	62.251	-2.67421	0.825408	19.0509	23.0153	23.8953	24.3754	24.601	25.0077
sll0754	RbfA	Ribosome-binding factor A	133	14.749	1	3	27.8	10	0	26.165	-2.70743	1.15705	18.6974	19.415	22.2741	22.8219	22.6155	23.0714
ssl3445	RpmE	50S ribosomal protein L31	81	9.3036	1	3	25.9	6	0	19.102	-2.91458	0.846129	22.441	19.1956	17.9209	23.1801	24.0152	21.1059
sll0450;chr1_162383	Sll0450	cytochrome b subunit of nitric oxide reductase;chr1_162383 Hypothetical protein [3482165 - 3479832]	736;778	81.292	2	2;2	2.7	2	0	12.186	-2.99082	0.824853	19.0757	19.1474	17.9055	20.0067	20.1323	24.962
slr0321	Era	GTPase Era	315	34.791	1	3	12.4	7	0	17.939	-5.56112	3.39082	18.0675	19.4875	18.0162	24.0582	23.8024	24.3939
sfGFPFLAG	sfGFPFLAG	sfGFP-3xFLAG fusion protein	241;249	27.187	2	26;11	81.3	168	0	323.31	-14.03	2.58602	24.6993	19.399	17.7588	34.6548	34.4769	34.8155

## Sheet: Table S9
Supporting Table S9 - List of identified proteins from Student's t-test: Slr1079S-3xFLAG and control Co-IP
Protein identity					Protein identification						Student's t-test		Label-free protein quantification (Log2 LFQ intensities; imputed values in italic)
Protein IDs	Protein name	Protein description	Sequence lengths	Mol. weight [kDa]	Number of proteins	Peptide counts	Sequence coverage [%]	MS2 counts	Q-value	Score	Log2 t-test Difference (Slr1079S1 IP/sfGFP IP)	-Log10 t-test p-value	Slr1079S IP Replicate 1	Slr1079S IP Replicate 2	Slr1079S IP Replicate 3	sfGFP IP Replicate 1	sfGFP IP Replicate 2	sfGFP IP Replicate 3
chr1_16981-3xFLAG; chr1_16981;chr1_17047	Slr1079S-3xFLAG	Chr1_16981-3xFLAG fusion protein [383370 - 383753]; chr1_16981 Hypothetical protein [383370 - 383753]	130;128;100	15.019	3	19;16;3	86.9	136	0	323.31	10.1142	1.38161	34.3803	34.8147	34.1693	29.1478	17.7449	26.1291
slr1079	Slr1079	Slr1079 protein	164	19.037	1	9	37.8	24	0	71.994	8.78161	4.69451	27.095	27.8497	27.4595	18.5889	18.2083	19.2621
ssl5113	Ssl5113	Uncharacterized protein	96	10.544	1	6	42.7	13	0	28.234	6.46626	4.19887	25.0941	25.4232	24.8367	18.5565	18.1349	19.2637
sll1353	Sll1353	histidine kinase	998	111.13	1	11	14.1	26	0	40.927	5.70603	3.90761	23.5487	24.1815	24.7114	18.4951	18.0836	18.7449
slr1958	Slr1958	Slr1958 protein	200	23.031	1	5	20	12	0	22.681	5.64435	4.51647	24.1937	24.601	24.0898	18.5117	18.3601	19.0797
slr0731	Slr0731	Slr0731 protein	402	44.716	1	6	17.2	11	0	39.711	5.17534	3.21287	22.8932	24.4605	24.077	18.6315	18.2212	19.052
slr0058;chr1_114476	Slr0058	Slr0058 protein	142;148	16.485	2	5;5	40.8	16	0	45.275	4.8025	1.55879	25.4338	24.7449	24.4423	22.8173	18.353	19.0432
slr0043	CmpC	Bicarbonate transport ATP-binding protein CmpC	667	74.096	1	9	14.2	15	0	37.875	4.41822	4.1097	23.1303	23.1446	23.2651	19.1407	18.2559	18.8887
sll0272	Sll0272	hypothetical protein	141	15.78	1	2	25.5	4	0	5.1748	4.36595	0.842423	25.2844	25.4751	18.3105	18.6973	17.8044	19.4706
slr0442	Slr0442	minor pilin PilX2	611	62.907	1	6	12.9	13	0	19.421	4.2624	3.96284	23.0829	22.8028	23.3087	18.7951	18.3921	19.2199
slr2018	Slr2018	Slr2018 pilin operon protein	799	84.853	1	16	26.9	38	0	204.95	4.05048	3.08361	26.8544	27.8513	27.0936	23.8533	22.7393	23.0552
slr0114	Slr0114	Slr0114 protein	510	56.722	1	4	7.1	8	0	18.078	3.92091	2.90727	22.6269	22.9176	22.6918	19.1009	17.9021	19.4707
slr0729	Slr0729	Thylakoid-associated protein slr0729	101	10.946	1	4	54.5	11	0	35.978	3.89169	0.889527	24.3962	24.2227	23.9536	24.3097	17.6935	18.8941
slr1330	AtpC	ATP synthase epsilon chain	136	14.58	1	2	30.9	9	0	25.429	3.7719	0.96836	18.5712	23.9113	23.8866	18.5366	17.5519	18.9649
sll1743	RplK	50S ribosomal protein L11	141	14.977	1	3	16.3	6	0	7.6235	3.67179	0.989597	23.5536	23.697	23.8589	23.3566	17.495	19.2425
sll1908	Sll1908	D-3-phosphoglycerate dehydrogenase	526	56.211	1	5	11.2	13	0	33.406	3.39503	0.935578	22.8063	23.8176	24.3103	18.7623	23.5211	18.4657
slr0869	Slr0869	Slr0869 protein	812	92.531	1	5	6.4	9	0	19.558	3.35504	2.22369	21.0605	21.549	22.618	18.744	17.531	18.8872
sll7086	Sll7086	CRISPR3 type III-Bv system Cmr5 protein	131	14.549	1	2	16	4	0	20.014	3.20164	1.48378	22.5318	19.763	22.6594	18.0051	18.2578	19.0864
slr0552	Slr0552	Slr0552 protein	244	26.721	1	4	17.6	10	0	22.181	3.13545	3.30651	21.5909	22.0397	22.1775	19.0548	18.3083	19.0386
sml0008	PsaJ	Photosystem I reaction center subunit IX	40	4.5324	1	2	87.5	7	0	9.2806	3.09098	0.553033	18.7262	20.4181	26.7939	18.8798	18.361	19.4245
psysx_133;slr6001	Slr6001	histidine kinase	981;862	110.36	2	2;1	1.9	2	0	2.5679	2.93254	0.405393	18.9282	27.906	18.5654	18.7458	18.4597	19.3964
slr0924;chr1_123830	Slr0924	periplasmic protein, function unknown;chr1_123830 Hypothetical protein [2798553 - 2799470]	242;306	26.113	2	3;3	16.9	10	0	10.809	2.82418	0.801538	23.0225	23.0853	22.7165	23.2561	17.8203	19.2754
smr0005	PsaM	Photosystem I reaction center subunit XII	31	3.38	1	2	100	10	0	19.052	2.81286	0.414607	27.0166	27.4095	27.5759	27.4835	27.3207	18.7592
sll1435	Sll1435	glutamyl-tRNA(Gln) amidotransferase subunit B	519	57.605	1	3	5.8	6	0	14.241	2.71157	1.80869	21.5881	20.0577	22.0813	18.7223	17.98	18.89
sll1819	RplQ	50S ribosomal protein L17	116	13.228	1	3	35.3	6	0	11.815	2.69923	0.531858	22.8507	22.9422	22.8341	18.4154	17.4976	24.6163
sll1638	Sll1638	Sll1638 protein	149	16.477	1	3	29.5	4	0	26.851	2.63241	0.669029	18.6025	20.2736	24.4699	18.9788	17.7502	18.7198
slr1940	Slr1940	Slr1940 protein	482	51.261	1	3	13.9	4	0	3.6374	2.59331	0.527244	18.7985	19.6406	25.6568	18.8379	18.4919	18.9862
slr1841	Slr1841	Slr1841 protein	630	67.6	1	3	6.2	11	0	22.484	2.57943	0.89095	22.3247	20.0041	23.0257	18.8552	17.6863	21.0748
sll0180	Sll0180	Sll0180 protein	501	53.966	1	3	6.6	9	0	16.337	2.57857	1.70839	21.9219	20.0053	21.6534	18.603	18.051	19.191
slr0013	Slr0013	Slr0013 protein	175	18.69	1	3	21.1	9	0	10.986	2.55334	1.42183	21.8445	19.6243	21.4673	18.5923	17.5271	19.1568
slr0809	RfbB	UDP-glucuronate decarboxylase	328	36.942	1	2	7.6	4	0	5.5789	2.52393	1.46932	21.8087	19.7603	21.9847	18.5546	18.1078	19.3196
slr1349	Pgi	Glucose-6-phosphate isomerase	531	58.356	1	6	11.1	15	0	17.607	2.51306	0.847496	22.4898	21.9571	22.6093	22.4348	17.8235	19.2587
slr1853	Slr1853	Slr1853 protein	113	12.111	1	3	29.2	6	0	16.719	2.49469	1.96114	22.3121	20.6297	21.0535	18.7748	18.4695	19.2669
sll0807	Rpe	Ribulose-phosphate 3-epimerase	230	24.971	1	3	13.5	11	0	24.257	2.48494	0.750519	25.0061	23.9063	23.6299	23.3715	22.9324	18.7836
sll1069	FabF	3-oxoacyl-[acyl-carrier-protein] synthase 2	416	44.004	1	5	13	6	0	12.745	2.431	2.24425	21.343	20.1364	21.3316	18.6703	18.0962	18.7515
sll0041	PixJ1	Photoreceptor for positive phototaxis PixJ1	1000	108.33	1	11	11.9	22	0	40.863	2.4157	0.978798	22.4463	23.8804	24.1575	22.4382	21.7352	19.0636
slr2032	Ycf23	Ycf23 protein	248	25.366	1	3	16.5	9	0	28.274	2.41545	1.21698	23.2377	22.8565	23.4812	21.6023	21.777	18.9498
ssl1911	Ssl1911	Ssl1911 protein	65	7.4753	1	2	40	5	0	8.8424	2.31201	1.34287	19.4174	21.3737	21.4518	18.4326	17.6521	19.2223
sll1316	PetC2	Cytochrome b6-f complex iron-sulfur subunit 2	180	18.996	1	5	33.3	25	0	38.631	2.29065	0.542808	25.0028	24.8348	24.7449	24.5046	24.3604	18.8455
sll1261	Tsf	Elongation factor Ts	218	24.231	1	7	35.8	22	0	44.227	2.28036	0.645811	24.7908	24.4714	24.0365	24.059	23.3819	19.0168
sll1981	IlvB	Acetolactate synthase	550	60.173	1	5	11.3	10	0	11.147	2.27838	1.15418	21.8286	21.7525	21.9806	19.1942	18.1969	21.3355
sll1583	Lig	DNA ligase	562	61.468	1	11	27	31	0	52.353	2.27522	2.84288	24.8745	25.2223	25.0666	23.1216	22.9754	22.2406
slr1051;chr1_22344	FabI	Enoyl-[acyl-carrier-protein] reductase [NADH] FabI	258;315	27.625	2	2;2	8.9	7	0	5.8314	2.24553	0.805688	21.2611	21.1307	22.0414	21.6061	17.328	18.7625
sll1098	FusB	Elongation factor G 2	691	75.43	1	2	2.5	5	0	4.0179	2.23547	1.66986	21.3032	20.1309	20.9958	18.7674	17.6322	19.3239
slr1517	LeuB	3-isopropylmalate dehydrogenase	362	38.667	1	3	10.2	6	0	6.2662	2.20207	1.87585	20.8713	19.8017	20.6632	18.6397	17.4357	18.6546
sll1536	MoeB	Molybdopterin biosynthesis MoeB protein	392	42.759	1	3	8.4	5	0	11.369	2.1738	0.546805	19.1546	22.8721	23.0386	21.7342	17.5358	19.2738
sll0078	ThrS	Threonine--tRNA ligase	603	68.872	1	3	5.5	5	0	7.5301	2.14409	0.728871	18.7236	20.027	23.2073	18.723	18.1006	18.702
ssr2998	Ssr2998	Ssr2998 protein	65	7.2203	1	4	41.5	15	0	16.091	2.13901	0.616008	24.727	24.2844	24.5904	24.2616	23.6137	19.3095
sll1594	RbcR	Rubisco operon transcriptional regulator	316	35.696	1	4	13.6	4	0	8.3905	2.10189	0.918677	18.5346	21.4128	21.668	18.525	17.7661	19.0186
sll5034	Sll5034	Sll5034 protein	207	23.2	1	2	10.6	4	0	6.5521	2.05131	1.34969	21.5879	19.7478	21.2295	18.7981	18.0563	19.5569
sll0057	GrpE	Protein GrpE	249	27.567	1	8	36.9	19	0	35.38	1.99785	0.620097	24.0751	24.0619	24.1873	23.5782	23.5375	19.2151
slr0193	Slr0193	RNA-binding protein	151	16.616	1	4	36.4	12	0	12.97	1.97227	0.990808	23.5121	23.6537	23.2536	22.5834	22.261	19.6583
sll1502	GltB	Ferredoxin-dependent glutamate synthase 1	1550	169.07	1	11	7.6	18	0	41.065	1.95227	1.0471	23.1392	22.2926	22.5547	21.833	21.2289	19.0677
FLAG	3xFLAG peptide	Cleaved 3xFLAG peptide	19	2.3242	1	5	100	221	0	323.31	1.8746	0.761209	34.434	33.3375	31.8598	33.0319	30.6407	30.3349
sll1212	RfbD	GDP-mannose 4,6-dehydratase	362	41.333	1	7	20.4	21	0	23.757	1.87103	0.545276	23.6884	23.3523	23.5922	23.6261	22.6999	18.6937
slr1470	Slr1470	Slr1470 protein	131	14.902	1	2	15.3	5	0	6.2905	1.87087	0.837919	21.6189	20.1792	21.2516	20.9174	17.7067	18.813
sll1089	Sll1089	Sll1089 protein	213	23.491	1	3	15	3	0	11.372	1.86583	0.486104	23.8992	20.0502	18.3044	18.447	18.9296	19.2797
sll0362	AlaS	Alanine--tRNA ligase	877	96.14	1	2	2.6	3	0	3.038	1.86011	0.969855	18.8432	20.0569	21.8511	18.3915	18.0269	18.7525
sml0007	PsbY	Photosystem II protein Y	39	4.2019	1	2	25.6	10	0	14.32	1.84812	0.431217	24.7641	24.8335	24.7729	24.8882	24.6603	19.2776
ssr0330	FtrV	Ferredoxin-thioredoxin reductase, variable chain	75	8.5576	1	1	17.3	1	0	4.7748	1.84601	0.742955	18.7227	20.3274	22.5657	18.6887	18.2772	19.112
slr1909;chr1_27317	Slr1909	NarL subfamily	213;233	24.046	2	2;2	10.3	7	0	3.8571	1.83923	1.68164	20.4213	20.1063	20.6252	18.4819	17.7584	19.3948
slr0148	Slr0148	hypothetical protein	160	17.823	1	2	13.8	3	0	10.51	1.83673	0.935619	21.838	20.0753	18.9856	18.3426	17.856	19.1901
slr0172	GuaB	IMP dehydrogenase	155	17.27	1	1	8.4	4	0	13.705	1.81879	0.76263	18.9401	20.1144	22.2269	18.78	17.6194	19.4256
slr0925	Ssb	Single-stranded DNA-binding protein 1	121	13.656	1	4	34.7	9	0	10.248	1.81573	0.578778	23.0437	19.913	18.5651	19.0919	17.8117	19.1709
sll0726	Pgm	Phosphoglucomutase	567	61.124	1	7	13.6	18	0	33.931	1.79358	0.707492	22.9887	22.7543	22.8643	22.5993	21.8178	18.8094
chr1_98563	Chr1_98563	Hypothetical protein [2216136 - 2216393]	86	9.7377	1	1	16.3	1	0	2.6854	1.78292	1.14334	19.1025	20.2942	21.1498	18.1622	17.8008	19.2347
slr0875	MscL	Large-conductance mechanosensitive channel	145	15.805	1	1	9	4	0	7.6569	1.77965	1.14053	19.1088	20.0485	21.471	18.4289	17.9818	18.8785
slr0151	Slr0151	Slr0151 protein	320	34.915	1	3	15.9	5	0	8.6549	1.76866	1.08937	18.829	20.5426	21.4027	18.5009	18.3071	18.6603
slr6071;slr6012	Slr6012	Slr6012 protein	730;730	84.206	2	6;6	8.9	8	0	17.539	1.75928	0.632177	18.3551	19.7157	22.4459	18.9613	17.7499	18.5277
slr0426	FolE	GTP cyclohydrolase 1	234	26.639	1	3	14.5	5	0	7.3322	1.75202	0.669174	22.7094	21.5692	21.8166	21.5922	18.0171	21.2297
slr1619	Slr1619	Rhamnosyl O-methyltransferase	249	27.752	1	4	19.3	4	0	8.3037	1.7302	0.822015	22.0149	19.8519	18.9262	19.1182	17.9526	18.5316
slr0044	CmpD	Bicarbonate transport ATP-binding protein CmpD	282	31.34	1	4	14.2	9	0	17.892	1.72784	0.764288	22.0138	19.9792	18.7411	18.2945	17.9358	19.3202
slr0645	Slr0645	Slr0645 protein	206	22.785	1	3	12.1	5	0	5.8242	1.7254	1.10326	21.5084	21.3602	21.3207	18.7928	21.1271	19.0933
sll1852	Ndk	Nucleoside diphosphate kinase	149	16.692	1	6	48.3	28	0	15.438	1.71108	0.698547	23.8299	23.1535	23.3884	23.1383	22.5229	19.5773
sll1398	Psb28	Photosystem II reaction center Psb28 protein	112	12.59	1	4	46.4	13	0	33.013	1.69966	0.491209	23.8302	23.6013	23.7992	23.8515	23.2269	19.0533
sll0480	DapL	LL-diaminopimelate aminotransferase	412	45.087	1	8	23.5	19	0	24.776	1.68255	0.647766	22.7863	23.2017	22.8257	22.6259	22.2047	18.9355
sll2005	GyrB	DNA gyrase subunit B	1078	122.82	1	2	1.9	2	0	3.576	1.66309	0.917742	18.7793	20.0102	21.2906	17.9055	17.9488	19.2365
slr1763	Slr1763	Slr1763 protein	400	45.355	1	2	4.5	2	0	6.6066	1.64681	0.78817	18.5551	19.958	21.5623	18.4915	17.6035	19.0399
slr0038	Slr0038	Slr0038 protein	132	15.24	1	2	16.7	3	0	7.5041	1.64376	0.98865	20.9009	20.4129	18.7281	18.2852	17.6929	19.1324
slr0542	ClpP1	ATP-dependent Clp protease proteolytic subunit 1	198	21.741	1	1	14.6	2	0	4.2004	1.63896	0.526928	22.7982	19.9289	18.3373	18.7883	17.9693	19.39
sll0039	Sll0039	CheY subfamily	119	13.181	1	3	33.6	6	0	9.8069	1.62779	0.857086	21.4014	19.8977	18.6717	18.6884	17.5758	18.8232
sll1733	NdhD3	NADH dehydrogenase subunit 4	502	54.346	1	1	2.6	2	0	7.8958	1.62134	0.961342	21.1967	19.9244	18.4951	18.2202	18.0574	18.4745
sll0402	AspC	Aspartate aminotransferase	389	42.352	1	5	15.9	5	0	12.721	1.61924	0.758998	22.0901	20.2322	18.8738	19.2	18.1846	18.9537
sll0145	Frr	Ribosome-recycling factor	182	20.186	1	3	20.9	12	0	18.116	1.61907	0.604769	23.3401	23.0098	22.9961	22.9864	22.3679	19.1345
slr0886	FabG	3-oxoacyl-[acyl-carrier-protein] reductase	247	25.723	1	3	13	15	0	16.767	1.6178	0.618716	22.744	22.608	23.0651	22.6443	22.0397	18.8799
sll1218	Ycf39	Ycf39 protein	219	23.534	1	3	13.2	6	0	7.4492	1.60624	0.644309	21.6973	20.0921	18.1358	18.6489	17.4789	18.9787
sll1091	ChlP	Geranylgeranyl diphosphate reductase	407	44.882	1	9	25.8	17	0	37.761	1.60037	0.647196	23.1706	22.4484	23.248	22.4082	22.4779	19.1798
sll1262	NdhN	NAD(P)H-quinone oxidoreductase subunit N	161	17.629	1	4	34.2	9	0	28.816	1.59035	0.442921	23.9989	23.8842	24.0902	23.9033	23.9795	19.3194
slr0583	Slr0583	Slr0583 protein	310	35.232	1	2	4.8	1	0.0065147	1.8552	1.58906	0.557213	18.827	22.398	18.8827	18.1523	17.8558	19.3324
chr1_143957;slr0549	Chr1_143957	Hypothetical protein [3248307 - 3249323];slr0549 aspartate beta-semialdehyde dehydrogenese	339;269	36.694	2	4;3	11.8	10	0	16.106	1.57391	0.619543	22.665	21.7957	22.1033	22.0311	21.3925	18.4188
sll0837	Sll0837	Sll0837 protein	294	32.906	1	4	14.3	9	0	19.006	1.57386	0.723968	22.3388	22.3714	22.0348	21.6908	21.636	18.6966
sll0872	Sll0872	Sll0872 protein	130	13.929	1	3	28.5	16	0	36.046	1.57303	0.39339	24.051	23.4029	23.3489	24.1687	23.1848	18.7302
slr1887	HemC	Porphobilinogen deaminase	320	34.894	1	7	21.9	10	0	21.803	1.5669	0.66059	22.4871	22.2245	22.6892	22.218	21.6922	18.7899
sll2001	Sll2001	leucine aminopeptidase	508	53.885	1	6	13.6	19	0	34.412	1.54954	0.55555	22.9157	22.5079	22.6282	22.4001	22.3286	18.6745
sll1298	Sll1298	Putative carboxymethylenebutenolidase	246	26.941	1	2	11	4	0	9.9383	1.54949	0.859985	18.723	20.6995	21.2467	18.8584	18.018	19.1444
sll1815;chr1_279789	Adk1	Adenylate kinase 1	187;194	20.453	2	4;4	23	14	0	20.767	1.54508	0.671544	23.2966	22.9888	23.1709	22.906	22.3651	19.5499
slr1624	Slr1624	Slr1624 protein	458	51.008	1	2	6.8	2	0	6.0609	1.53517	0.798467	18.5213	20.2867	21.225	18.2841	17.8967	19.2467
slr1410	Slr1410	Uncharacterized WD repeat-containing protein slr1410	334	35.989	1	3	9.9	3	0	7.8632	1.52817	0.677054	21.7469	20.1078	18.3723	18.5022	18.0185	19.1218
slr1944	Slr1944	Slr1944 protein	538	58.685	1	2	4.5	2	0	9.4641	1.49838	0.886736	21.1261	20.2443	18.6216	18.5238	17.9909	18.9821
slr1251	Slr1251	peptidyl-prolyl cis-trans isomerase	170	18.404	1	4	28.8	11	0	41.222	1.49812	0.414181	23.8724	23.2852	22.6172	23.6713	22.7963	18.8128
slr1855	Slr1855	Slr1855 protein	607	70.003	1	5	8.7	13	0	19.058	1.48585	0.533764	23.2496	22.7369	22.9854	22.6166	22.8261	19.0716
slr1843	Zwf	Glucose-6-phosphate 1-dehydrogenase	509	57.885	1	9	17.3	23	0	30.921	1.48119	0.535195	23.1941	23.3003	23.1511	22.7233	23.1701	19.3086
slr0506	Por	Light-dependent protochlorophyllide reductase	322	36.061	1	5	15.8	13	0	16.156	1.47945	0.833928	22.4531	22.1943	22.8102	22.2412	21.2789	19.4991
slr1751	Prc	Carboxyl-terminal protease	423	46.832	1	10	26	19	0	51.376	1.4686	0.562941	22.6667	22.2756	22.4186	22.4489	21.795	18.7111
sll1931	GlyA	Serine hydroxymethyltransferase	427	46.259	1	7	19.2	17	0	21.187	1.45345	0.528014	23.0808	22.3729	22.7414	22.7302	22.1947	18.91
slr1734	OpcA	Putative OxPP cycle protein OpcA	475	52.033	1	4	10.9	7	0	20.447	1.45125	0.540738	22.2084	20.2344	22.015	18.4975	21.9244	19.6821
sll1721	PdhB	Pyruvate dehydrogenase E1 component subunit beta	324	35.709	1	1	3.7	1	0	2.8272	1.44879	1.0933	20.1719	20.3846	18.5056	18.4302	17.8631	18.4226
slr2136	IspG	4-hydroxy-3-methylbut-2-en-1-yl diphosphate synthase (ferredoxin)	403	44.175	1	1	2.2	1	0.0016863	2.3489	1.44691	1.33299	19.1206	20.0555	20.5279	18.6575	17.8733	18.8325
sll0680	PstS	Phosphate-binding protein	383	40.023	1	2	7.8	2	0	4.4314	1.44521	0.984341	19.0391	20.1077	21.0255	19.0327	17.8542	18.9498
sll0179	GltX	Glutamate--tRNA ligase	483	54.008	1	2	6.2	2	0.0065466	1.9596	1.43766	1.28199	20.9207	20.2258	19.1422	18.6977	18.4805	18.7975
slr1289	Slr1289	isocitrate dehydrogenase (NADP+)	475	52.258	1	6	12.2	12	0	22.814	1.4339	0.447785	23.688	22.9488	23.3446	23.4223	23.0783	19.1791
sll1499	Sll1499	ferredoxin-dependent glutamate synthase	1546	168.35	1	6	3.9	7	0	18.135	1.42938	0.544483	21.5677	20.1472	21.6575	21.7296	18.2132	19.1415
slr1301	Slr1301	Slr1301 protein	535	61.692	1	1	2.8	3	0	3.9184	1.42132	1.21488	19.2243	20.5827	19.8876	18.5225	17.788	19.1201
slr0165	ClpP3	Probable ATP-dependent Clp protease proteolytic subunit 3	202	22.397	1	8	43.1	13	0	22.418	1.41687	0.491823	23.1908	22.7484	22.429	22.6407	22.5762	18.9007
sll0542	AcsA	Acetyl-coenzyme A synthetase	653	73.051	1	2	3.5	4	0	4.4755	1.4155	1.4559	20.158	20.2973	19.0527	18.3086	18.1063	18.8466
slr0040	CmpA	Bicarbonate-binding protein CmpA	452	49.46	1	15	44.5	83	0	163.78	1.39798	1.82092	28.0497	27.9443	27.8283	26.7919	26.9599	25.8765
sll0534	ClpP2	ATP-dependent Clp protease proteolytic subunit 2	226	24.823	1	1	12.8	2	0	3.0168	1.39669	1.08308	18.882	20.0834	20.7756	18.6348	18.0408	18.8753
sll1533	PilT	Twitching mobility protein	428	47.898	1	4	9.1	8	0	11.069	1.38908	0.978406	19.2405	20.3494	21.1824	19.1684	18.1603	19.2764
slr1234	Slr1234	Uncharacterized HIT-like protein slr1234	114	12.456	1	2	18.4	8	0	7.4071	1.38649	0.650006	21.6193	19.9743	20.9765	21.0669	18.2356	19.1081
sll0757	PurF	Amidophosphoribosyltransferase	495	53.67	1	1	2.2	2	0	5.2339	1.38587	0.673198	18.5642	19.8949	21.4578	19.0049	17.7519	19.0025
sll0051	Sll0051	Sll0051 protein	159	17.799	1	4	24.5	12	0	11.68	1.3528	0.536012	23.2176	22.2024	23.0622	22.757	22.3114	19.3553
sll1530	Sll1530	Sll1530 protein	386	43.745	1	3	9.8	3	0	12.992	1.35195	0.90678	20.8947	20.2595	18.6186	18.496	18.3488	18.8722
slr0550	DapA	4-hydroxy-tetrahydrodipicolinate synthase	301	31.821	1	3	12	10	0	12.988	1.34763	0.648915	21.0643	20.3485	20.7868	21.0381	17.8775	19.2412
slr0677	Slr0677	Putative biopolymer transport protein ExbB-like 2	227	25.074	1	2	7.5	2	0	6.1264	1.33839	0.563951	18.1307	20.1096	21.3145	18.5473	17.6319	19.3603
slr0039	Slr0039	Uncharacterized protein slr0039	357	38.418	1	2	5.3	3	0	4.7677	1.33232	0.835284	18.5345	20.3271	20.6598	18.6484	17.8716	19.0044
slr0557	ValS	Valine--tRNA ligase	910	102.74	1	3	4.1	5	0	4.888	1.32712	0.589566	21.7832	20.1241	18.3791	18.7309	18.4214	19.1528
sll0224	Sll0224	Sll0224 protein	298	32.829	1	3	13.4	8	0	16.372	1.32206	0.643559	20.9456	19.9755	20.3978	20.6004	17.5421	19.2103
slr1735	Slr1735	ABC transporter	252	28.017	1	2	7.1	2	0	4.864	1.3199	0.895947	20.9616	19.8563	19.0986	19.1931	17.8174	18.9464
sll0320	Rnd	Ribonuclease D	217	24.403	1	2	9.7	7	0	8.3059	1.30452	0.98682	21.0205	20.0457	19.151	19.1564	18.1677	18.9796
slr0049	Slr0049	Slr0049 protein	398	44.058	1	2	7.5	3	0	6.6845	1.30404	0.803695	18.9995	20.1751	20.9843	18.9942	17.8218	19.4307
ssl1972	Ssl1972	UPF0367 protein ssl1972	93	9.9234	1	1	10.8	3	0	2.6394	1.30077	0.697517	18.7755	19.5969	21.5651	18.7849	18.3032	18.9472
sll0887	Sll0887	Sll0887 protein	446	47.599	1	2	5.6	1	0.0016949	2.3943	1.29904	1.09253	20.5419	19.8415	19.1313	18.8234	17.781	19.0132
sll0430	HtpG	Heat shock protein	658	75.029	1	3	5.2	4	0	7.4506	1.29691	1.08938	20.6598	19.9111	18.9696	18.4892	18.1114	19.0492
ssl2781	Ssl2781	Ssl2781 protein	82	9.655	1	2	24.4	2	0	3.5994	1.28768	0.605161	21.2326	19.951	18.9565	19.3149	17.3884	19.5737
slr0006;chr1_109609	Slr0006	Slr0006 protein	217;249	23.373	2	7;7	49.3	27	0	31.856	1.28752	2.25754	25.0787	25.5137	25.8725	24.2266	24.284	24.0918
slr0937	Slr0937	Slr0937 protein	417	46.1	1	1	2.6	1	0	4.8259	1.27342	0.746277	18.5782	20.4737	20.8697	18.4322	18.2992	19.37
sll1712	Hup	DNA-binding protein HU	100	10.891	1	9	52	44	0	54.081	1.27295	1.6542	26.9466	26.7421	26.6926	26.0341	25.6558	24.8726
slr0164	ClpR	Putative ATP-dependent Clp protease proteolytic subunit-like	225	24.881	1	3	13.3	12	0	20.028	1.27264	0.534384	22.7477	22.0995	22.4604	22.1417	22.2499	19.0981
slr0476	Slr0476	Slr0476 protein	136	14.394	1	2	10.3	6	0	8.2989	1.27095	0.563412	21.3957	20.6075	18.1589	19.1698	18.3703	18.8092
sll1979	Sll1979	Sll1979 protein	142	15.946	1	1	10.6	1	0	3.0514	1.22916	0.636445	21.3178	19.8872	18.6168	18.649	18.0745	19.4108
slr0597	Slr0597	phosphoribosyl aminoimidazole carboxy formyl formyltransferase/inosinemonophosphate cyclohydrolase (PUR-H(J))	553	59.326	1	5	9.4	17	0	20.734	1.22809	0.482577	22.6508	22.5089	22.6327	22.5588	22.3885	19.1609
slr0898	NirA	Ferredoxin--nitrite reductase	502	55.926	1	6	12.9	22	0	18.277	1.2253	0.462169	22.8127	22.9154	23.0664	22.8404	22.8582	19.4201
slr0244	Slr0244	Slr0244 protein	284	31.204	1	7	29.9	19	0	41.986	1.20136	2.03411	22.7354	23.0637	23.561	22.0522	21.947	21.7568
sll1762	Sll1762	periplasmic protein, putative polar amino acid transport system substrate-binding protein	299	32.831	1	7	28.4	13	0	24.679	1.19884	0.60579	22.4459	21.5786	22.1441	21.6591	21.7543	19.1588
ssr1789	HliA	High light inducible protein	57	6.4724	1	1	15.8	3	0.0017036	2.4177	1.19614	1.31145	19.1628	19.9593	19.8284	18.9264	17.7732	18.6624
slr1295	FutA1	Iron uptake protein A1	360	39.37	1	3	7.5	3	0	5.3244	1.19587	0.87053	20.5481	20.1876	18.7592	19.0846	17.9873	18.8354
sll1883	ArgJ	Arginine biosynthesis bifunctional protein ArgJ	413	43.32	1	6	15.5	8	0	22.163	1.17085	0.603606	22.4207	22.0722	22.0931	22.1358	21.6094	19.3283
slr0001	Slr0001	Slr0001 protein	160	17.451	1	2	21.2	5	0	3.3192	1.16914	0.562858	21.3087	19.7389	18.1251	18.5686	18.4192	18.6775
sll1027	GltD	NADH-glutamate synthase small subunit	494	54.144	1	4	9.9	4	0	8.1595	1.15552	0.362199	21.4832	20.2412	18.1474	20.3094	17.1715	18.9242
sll1239	Sll1239	Sll1239 protein	178	20.608	1	2	11.2	5	0	7.0647	1.1528	0.443602	21.692	19.7329	17.9259	18.8046	18.1342	18.9536
sll1687	Sll1687	Sll1687 protein	970	109.82	1	12	12.1	21	0	47.947	1.15214	0.225635	18.88	22.9722	24.4621	18.7737	21.8382	22.2461
slr0923	Slr0923	Probable 30S ribosomal protein PSRP-3	112	12.638	1	1	7.1	2	0	2.7334	1.14072	0.524883	21.1301	19.747	18.0504	18.4699	17.9173	19.1181
slr0149	Slr0149	Slr0149 protein	156	18.386	1	1	5.8	4	0.0033058	2.1494	1.13972	0.833675	18.8378	20.3272	19.7192	18.8238	17.5717	19.0695
slr0343	PetD	Cytochrome b6-f complex subunit 4	160	17.444	1	2	8.8	7	0	5.9702	1.13929	0.490462	21.2203	20.1641	21.8337	18.5897	21.6079	19.6026
sll1425;chr1_246784	ProS	Proline--tRNA ligase	603;618	66.929	2	2;2	4	2	0	4.0802	1.13914	0.670584	20.7998	20.4714	18.7026	18.9032	18.1139	19.5393
slr0654	Slr0654	Slr0654 protein	253	28.428	1	1	4	1	0.0049505	2.1282	1.13261	1.30826	19.3326	20.204	19.1012	18.1748	18.197	18.8682
slr0404	Slr0404	Slr0404 protein	333	34.864	1	1	3.9	2	0	6.1416	1.12176	0.74023	18.8673	20.6947	19.8991	18.4523	18.0704	19.5731
slr1783	Slr1783	two-component response regulator NarL subfamily	282	31.395	1	2	6.4	3	0	4.6489	1.11799	0.629781	20.8182	19.791	18.2008	18.6696	18.0022	18.7843
slr1744	AmiA	N-acetylmuramoyl-L-alanine amidase	649	70.011	1	3	4.8	10	0	8.947	1.11348	0.328108	18.6034	21.9195	21.897	18.8973	21.4068	18.7754
sll1390	Sll1390	Sll1390 protein	249	27.394	1	1	4	4	0	5.4887	1.10772	0.941041	18.8227	19.7168	20.2054	18.019	18.189	19.2137
sll0199	PetE	Plastocyanin	126	13.146	1	5	66.7	38	0	56.784	1.09638	1.13525	27.2309	26.5315	26.6213	26.4408	25.5726	25.0811
slr1604	FtsH3	ATP-dependent zinc metalloprotease FtsH 3	616	67.25	1	3	6.5	8	0	7.2361	1.09628	0.502868	21.6024	21.8557	21.9063	21.6566	21.624	18.795
sll1324	AtpF	ATP synthase subunit b	179	19.804	1	12	51.4	56	0	85.533	1.09279	2.69909	26.9929	27.4059	26.9593	25.9511	26.0054	26.1232
slr0161	PilT	Twitching motility protein	369	40.615	1	1	3.5	1	0	4.4693	1.09185	0.810333	18.9401	19.9227	19.4398	18.3699	17.3674	19.2898
sll0301	Sll0301	Sll0301 protein	169	18.611	1	1	7.7	2	0	3.6052	1.08245	1.27353	19.034	19.8741	19.4556	18.35	17.8354	18.931
slr1934	PdhA	Pyruvate dehydrogenase E1 component subunit alpha	342	38.158	1	1	2.3	4	0	2.4382	1.07214	0.626819	19.25	20.8653	18.7013	18.6189	17.7786	19.2027
slr7073	Slr7073	Slr7073 protein	114	12.421	1	1	9.6	1	0	5.8156	1.06746	0.844658	20.098	20.3493	18.5484	18.5904	18.3159	18.887
sll0370	Sll0370	carbamoyl-phosphate synthase, pyrimidine-specific, large chain	1105	121.62	1	3	2.4	8	0	6.9188	1.06511	0.46412	21.4117	20.1214	21.0756	18.3603	21.4964	19.5567
slr0965	DnaN	Beta sliding clamp	391	42.087	1	2	5.1	3	0	3.2895	1.05798	0.781269	18.5218	20.1103	20.2751	18.2678	18.3323	19.1333
sll0170	DnaK2	Chaperone protein DnaK2	636	67.613	1	28	45.6	110	0	182.77	1.05493	1.8613	27.3518	27.7225	27.6505	26.7949	26.6899	26.0751
slr0623	TrxA	Thioredoxin	107	11.748	1	7	71	44	0	61.967	1.0516	0.735962	26.5728	25.7632	26.2391	26.1232	25.2784	24.0186
sll0017	HemL	Glutamate-1-semialdehyde 2,1-aminomutase	433	45.891	1	4	10.4	9	0	20.249	1.04523	0.378625	23.0911	22.7564	22.8147	23.2535	22.7193	19.5538
sll0533	Tig	Trigger factor	471	52.61	1	5	10.2	14	0	23.268	1.02684	1.65258	23.6319	23.867	23.1397	22.7421	22.6644	22.1516
ssl3451	Ssl3451	Ssl3451 protein	81	9.1165	1	1	12.3	1	0.0016978	2.3995	1.01799	0.576419	19.6028	20.0974	18.4171	18.0601	17.4793	19.5239
ssl2595	Ssl2595	Ssl2595 protein	89	10.356	1	2	31.5	4	0	14.332	1.01743	0.629243	20.2112	20.2377	18.6475	18.699	17.8002	19.545
slr1963	Slr1963	Orange carotenoid-binding protein	317	34.658	1	13	41	55	0	104.64	1.01563	1.27751	27.0348	26.9502	27.2997	26.6371	26.1882	25.4124
sll0329	Gnd	6-phosphogluconate dehydrogenase, decarboxylating	482	52.873	1	6	14.3	18	0	35.546	1.00736	1.41831	23.8313	23.579	24.2608	23.2026	23.0875	22.3591
slr0394	Slr0394	phosphoglycerate kinase	400	41.67	1	18	55.5	85	0	188.19	0.99928	1.02943	27.9266	27.3665	27.3944	27.2802	26.5764	25.8331
slr2070	Slr2070	Slr2070 protein	284	31.874	1	2	6.7	2	0	5.1822	0.998526	0.850148	20.5432	20.0048	18.947	18.8266	18.3532	19.3197
sll1484	Sll1484	type 2 NADH dehydrogenase	487	52.818	1	1	2.7	4	0	5.7267	0.998109	1.06422	19.3082	20.403	19.6687	19.0204	18.1994	19.1658
slr0876	Slr0876	Slr0876 protein	409	45.252	1	2	3.9	2	0.001675	2.3188	0.991579	0.677477	18.7828	20.0817	20.0668	18.4713	17.8791	19.6062
sll0772	Sll0772	Uncharacterized protein sll0772	546	59.145	1	1	1.8	3	0	2.622	0.98658	0.592593	18.3985	19.8058	20.5365	18.9041	17.7999	19.077
slr0929	Slr0929	Slr0929 protein	195	21.699	1	1	4.6	2	0	2.4432	0.983842	0.984461	19.2161	19.8383	19.8373	18.2713	18.1834	19.4855
slr1848	HisD	Histidinol dehydrogenase	434	46.533	1	2	5.1	2	0	7.3786	0.974614	0.536143	20.819	20.0139	18.6295	18.8638	17.9997	19.6751
sll0220	GlmS	Glutamine--fructose-6-phosphate aminotransferase [isomerizing]	631	69.606	1	1	1.6	2	0.0016694	2.2474	0.970802	0.910558	18.8914	19.8889	19.4226	18.7438	17.6251	18.9216
sll1074	LeuS	Leucine--tRNA ligase	869	98.294	1	3	3.6	4	0	4.8182	0.96914	0.661243	19.8925	19.6235	18.7177	18.1592	17.6435	19.5235
slr1793;chr1_11522	Slr1793	transaldolase;chr1_11522 Hypothetical protein [260445 - 261635]	378;397	41.577	2	12;12	28.8	35	0	43.088	0.958892	0.993286	25.1323	25.0534	24.952	24.726	24.3155	23.2194
sll0185	Sll0185	Sll0185 protein	419	46.993	1	2	4.5	7	0	5.1193	0.957892	0.405953	21.2133	19.7529	21.6697	18.9389	21.5426	19.2808
sll0567	Fur	Ferric uptake regulation protein	165	19.072	1	2	11.5	3	0	3.1929	0.948813	0.501384	18.5667	20.2421	20.5405	19.4344	17.7282	19.3402
sll1958	Sll1958	histidinol phosphate aminotransferase	367	40.686	1	2	6	4	0	5.2352	0.937737	0.835159	19.083	20.2516	19.2715	18.8841	17.8555	19.0532
sll1031	CcmM	Carboxysome assembly protein CcmM	687	73.12	1	15	26.9	50	0	83.996	0.929429	3.7336	25.7564	25.9204	25.9074	25.0238	24.8819	24.8903
slr1409	Slr1409	WD repeat-containing protein slr1409	326	35.759	1	7	26.4	17	0	32.023	0.921139	0.301339	22.5686	22.7713	22.6342	23.0219	22.9335	19.2553
sll1393	GlgA2	Probable glycogen synthase 2	491	56.224	1	3	5.9	7	0	9.3038	0.905359	0.51046	20.4637	20.0141	18.3281	18.8416	17.8976	19.3507
slr1103	Slr1103	Slr1103 protein	706	79.83	1	1	1.8	1	0	4.4472	0.904653	0.840127	18.8556	20.1218	19.9924	19.1125	18.1639	18.9795
sll1194	PsbU	Photosystem II 12 kDa extrinsic protein	131	14.245	1	6	48.1	28	0	75.05	0.901946	0.68227	27.0189	26.0058	26.2877	26.3903	25.6204	24.5959
sll0830;chr1_190785	Sll0830	Elongation factor G-like protein	669;676	73.369	2	2;2	2.5	3	0	3.6425	0.896197	0.459748	18.8557	20.2549	20.7095	20.277	18.2018	18.6528
sll0617	Sll0617	Protein sll0617	267	28.905	1	9	40.4	38	0	70.081	0.885877	0.742778	25.2593	24.3878	24.9924	24.7347	24.1598	23.0873
slr1839	CcmK4	Carboxysome shell protein CcmK4	112	11.903	1	3	24.1	9	0	13.628	0.877755	0.222617	22.6914	19.9966	23.1163	22.4099	22.0746	18.6865
slr1898	ArgB	Acetylglutamate kinase	297	31.525	1	1	4	1	0	4.212	0.873849	0.581263	20.0186	19.989	18.0914	18.691	18.0792	18.7072
sll1873	Sll1873	Sll1873 protein	121	12.906	1	5	71.9	24	0	41.786	0.873844	0.851401	24.8169	24.8043	25.2575	24.9883	23.5674	23.7014
slr1434	PntB	NAD(P) transhydrogenase subunit beta	480	49.943	1	1	2.1	1	0	3.8314	0.865054	0.547057	18.9659	20.5771	19.0248	18.6679	17.8572	19.4475
slr0398	Slr0398	unknown protein	157	17.633	1	1	6.4	3	0	2.6195	0.864609	0.533974	18.4853	20.3671	19.1888	18.3695	17.7549	19.323
ssr1528	Ssr1528	Ssr1528 protein	94	10.118	1	6	56.4	33	0	49.112	0.864276	0.686351	26.4282	25.6515	25.9307	26.0421	25.1551	24.2204
slr0146;chr1_97004	Slr0146	Slr0146 protein	170;188	19.69	2	1;1	7.6	2	0	3.936	0.863714	0.796669	18.6598	20.0063	19.8368	19.0973	18.1707	18.6438
slr1124	Slr1124	phosphoglycerate mutase	443	49.344	1	3	9.5	9	0	11.45	0.855588	0.254617	21.9529	20.3084	18.8092	21.2896	17.919	19.2952
slr1908	Slr1908	Slr1908 protein	591	64.51	1	1	2.7	1	0	3.2447	0.855291	0.624962	18.7312	20.6924	19.1971	18.6716	18.396	18.9871
slr1838	CcmK3	Carboxysome shell protein CcmK3	103	11.003	1	1	10.7	1	0	4.1732	0.852678	0.676164	19.4967	20.1017	18.7433	18.5227	17.9114	19.3496
sll0230	Sll0230	hypothetical protein	101	10.944	1	2	16.8	7	0	5.1982	0.833347	0.167708	22.8796	20.1565	18.5623	22.4744	18.3581	18.2658
sll0616	SecA	Protein translocase subunit SecA	932	107.01	1	2	3.6	1	0.0033223	2.2112	0.833203	0.707126	18.7948	20.0168	19.9593	19.0088	18.0439	19.2186
slr1894	Slr1894	Protein slr1894	156	17.755	1	6	41	26	0	34.877	0.832823	0.833814	25.2302	24.8074	25.088	24.7477	24.5561	23.3233
sll0058	DnaK1	Chaperone protein dnaK1	692	75.178	1	1	1.2	1	0.0033113	2.2	0.82826	0.491103	18.4627	20.0479	20.047	18.6768	17.8131	19.5829
sll1663	Sll1663	Sll1663 protein	220	24.104	1	3	15	11	0	13.841	0.826909	0.38953	21.6126	20.3664	21.6847	21.3529	20.9942	18.8359
slr1722	GuaB	IMP dehydrogenase subunit	387	40.234	1	9	29.2	32	0	44.072	0.808084	1.17739	25.2887	24.6947	24.9428	24.5668	24.2895	23.6456
slr0543	TrpB	Tryptophan synthase beta chain	412	45.07	1	2	5.8	3	0	7.4193	0.805183	0.229264	21.2302	20.3461	18.6224	21.3092	17.3569	19.117
slr1573	Slr1573	hypothetical protein	262	29.113	1	1	3.4	1	0.004918	1.9982	0.801094	0.538721	18.7387	20.6067	19.0795	19.1245	18.0611	18.8361
slr0708	Slr0708	Slr0708 protein	402	44.68	1	3	13.4	7	0	3.7926	0.784538	0.236737	21.6636	20.4156	18.5407	21.253	18.1685	18.8448
slr1590	Slr1590	Slr1590 protein	295	32.604	1	2	6.8	5	0	8.7956	0.784152	0.459578	18.2726	19.5776	20.5925	18.9324	18.0956	19.0622
slr1161	Slr1161	Slr1161 protein	199	22.952	1	1	5	2	0	5.4914	0.783955	0.473115	20.4787	19.9746	18.4808	18.5919	18.3517	19.6387
sll1099	Tuf	Elongation factor Tu	399	43.733	1	32	75.9	172	0	323.31	0.782684	1.32875	28.7356	28.7338	29.0101	28.3114	28.296	27.524
slr1030	ChlI	Magnesium-chelatase subunit ChlI	357	39.463	1	1	2.8	3	0	3.0799	0.779836	0.545652	19.0511	20.6554	19.1043	18.5479	18.4048	19.5186
slr1761	YtfC	Peptidyl-prolyl cis-trans isomerase	201	21.555	1	4	19.4	15	0	22.994	0.773638	0.505422	23.6745	23.1668	22.816	23.5278	22.4341	21.3746
slr0452	IlvD	Dihydroxy-acid dehydratase	561	58.646	1	8	15.3	29	0	28.17	0.756962	0.889634	24.2802	23.8812	24.0205	23.831	23.5114	22.5686
sll1694	HofG	General secretion pathway protein G	168	17.573	1	3	17.3	21	0	16.629	0.755709	0.777066	25.7004	25.0627	25.6191	25.3345	24.8205	23.96
sll0018	FbaA	Fructose-bisphosphate aldolase class 2	359	38.972	1	16	41.5	71	0	167.85	0.755018	0.884344	27.3457	26.9698	27.2886	26.8579	26.7943	25.6869
slr0194	RpiA	Ribose-5-phosphate isomerase A	235	24.752	1	1	4.3	0	0	2.4289	0.751306	0.798724	18.6389	19.514	19.6026	18.8182	17.8864	18.7971
slr1516	SodB	Superoxide dismutase [Fe]	199	21.677	1	4	32.2	17	0	47.835	0.750188	0.55792	25.6254	24.8906	24.5761	25.1272	24.3458	23.3685
sll1070;chr1_280351	TktA	Transketolase	670;676	71.724	2	18;17	32.8	65	0	137.72	0.749032	0.848275	27.1693	26.8858	26.8913	26.74	26.5141	25.4452
sll0359;chr1_221462	Sll0359	hypothetical protein;chr1_221462 Hypothetical protein [2146473 - 2146003]	128;157	14.082	2	10;9	70.3	35	0	93.131	0.747761	1.97895	26.489	26.683	26.2093	25.5948	25.6522	25.891
slr1842	CysK	Cysteine synthase	312	33.173	1	1	3.5	1	0	2.5811	0.738997	0.467064	19.6855	20.1827	18.4964	18.5072	18.0311	19.6093
sll1029	CcmK1	Carboxysome shell protein CcmK1	111	12.102	1	9	70.3	34	0	96.956	0.72853	0.839062	27.1084	26.8544	27.1124	26.7758	26.598	25.5157
sll1058	DapB	4-hydroxy-tetrahydrodipicolinate reductase	275	29.09	1	2	8	4	0	3.0518	0.726773	0.22028	21.0344	21.2446	18.5295	21.3657	18.1984	19.0642
slr0823	Ycf3	Photosystem I assembly protein Ycf3	173	19.878	1	2	12.1	3	0	7.1046	0.716508	0.237144	21.6819	19.9896	18.7314	21.0148	18.2508	18.9877
slr2094	Slr2094	D-fructose 1,6-bisphosphatase class 2/sedoheptulose 1,7-bisphosphatase	345	37.074	1	17	47	91	0	262.1	0.710705	1.12181	28.7852	28.3859	28.7717	28.241	28.1662	27.4033
sll0006	AspC	Aspartate aminotransferase	394	43.979	1	3	8.1	4	0	5.9319	0.708779	0.67417	19.2423	20.1729	18.5546	18.585	18.7817	18.4768
sll1380	Sll1380	Sll1380 protein	214	23.884	1	2	10.3	1	0	4.9508	0.697405	0.373549	19.1324	20.7384	18.1545	18.6669	18.2668	18.9992
sll0519	NdhA	NAD(P)H-quinone oxidoreductase subunit 1	372	40.548	1	2	7.5	4	0	62.608	0.693731	0.114014	24.3408	20.4746	24.1261	24.1534	18.6526	24.0542
slr0536	HemE	Uroporphyrinogen decarboxylase	350	39.152	1	5	16.9	9	0	16.204	0.693254	0.202496	22.8304	19.8373	22.2498	22.0333	21.7532	19.0512
sll1358	Sll1358	Sll1358 protein	394	43.15	1	2	5.8	2	0	7.2604	0.691659	0.687618	18.5185	19.9719	19.699	18.6564	18.5557	18.9023
slr0585	ArgG	Argininosuccinate synthase	400	44.484	1	10	28.8	18	0	24.782	0.688713	1.39711	24.2039	24.1118	23.5835	23.4457	23.3525	23.0349
sll0289	MinD	Septum site-determining protein MinD	266	29.047	1	2	7.5	5	0	6.0806	0.687998	0.526042	18.8346	19.8088	18.7238	18.4815	17.614	19.2078
sll0258	PsbV	Cytochrome c-550	160	17.884	1	6	46.9	32	0	57.17	0.68605	0.587097	26.9354	25.7886	26.2772	26.3406	25.6546	24.9478
ssl2982	RpoZ	DNA-directed RNA polymerase subunit omega	76	8.7367	1	1	14.5	1	0	2.8936	0.684761	0.988409	18.8521	19.6885	19.0423	18.7665	18.1076	18.6546
slr0513	FutA2	Iron uptake protein A2	346	38.155	1	2	8.4	4	0	4.4104	0.683394	0.257174	20.8324	19.7594	18.9909	20.6856	17.5346	19.3123
sll0086	Sll0086	Putative arsenical pump-driving ATPase	396	44.626	1	1	2.5	2	0	5.4242	0.672117	0.409413	19.3025	19.9663	18.671	18.6106	17.6378	19.6751
slr1994	PhaB	Acetoacetyl-CoA reductase	240	25.333	1	3	15.8	5	0	7.2989	0.67196	0.179793	22.1209	20.2974	18.3656	21.153	17.9709	19.6442
sll1626	LexA	Transcription regulator LexA	203	22.744	1	3	12.8	4	0	7.7909	0.664725	0.178906	21.6414	21.642	19.0797	18.9506	22.3716	19.0468
ssl3364	Ssl3364	Ssl3364 protein	74	8.2948	1	3	35.1	14	0	29.142	0.641705	0.853455	24.5864	24.2686	24.2028	24.1443	23.9223	23.0661
sll0753	FolD	Bifunctional protein FolD	294	30.943	1	1	3.1	2	0.0017007	2.4177	0.6393	0.813576	18.7762	19.674	18.8178	18.576	18.0291	18.745
slr1020	SqdB	Sulfolipid biosynthesis protein SqdB	383	43.202	1	6	18.8	18	0	20.093	0.632793	0.582963	23.7187	23.0316	23.9945	23.542	23.0918	22.2126
sll1994	HemB	Delta-aminolevulinic acid dehydratase	327	36.163	1	8	24.5	32	0	35.768	0.632455	1.40653	23.8761	24.4192	24.4339	23.6604	23.7553	23.4161
sll1185	HemF	Oxygen-dependent coproporphyrinogen-III oxidase	340	38.937	1	4	13.2	11	0	14.384	0.621028	0.13971	18.9446	20.1625	22.5268	22.3497	18.0914	19.3296
sll0529	Sll0529	Sll0529 protein	731	78.316	1	15	30.4	46	0	104.25	0.61761	0.68602	26.2598	26.1592	26.0869	26.0631	25.8418	24.7482
slr1852	Slr1852	Slr1852 protein	188	21.834	1	7	38.8	28	0	30.299	0.609716	0.520408	25.1856	24.6967	24.9697	25.035	24.605	23.383
slr0665	AcnB	Aconitate hydratase B	868	93.551	1	5	6.6	11	0	20.916	0.60057	0.242975	22.4533	19.9628	21.8058	21.5794	21.2797	19.561
sll1679	HhoA	Putative serine protease HhoA	394	41.336	1	1	2.3	1	0	2.5879	0.600309	0.652594	18.7426	19.9388	18.9479	18.8475	18.2302	18.7507
sll1362	IleS	Isoleucine--tRNA ligase	988	112.34	1	2	2.4	1	0.0049423	2.0631	0.590925	0.338112	18.7271	20.3736	18.496	19.0867	17.7822	18.955
sll1317	PetA	Cytochrome f	328	35.23	1	7	22.6	27	0	39.816	0.580205	0.624624	24.9077	24.1565	24.7916	24.2548	24.5006	23.3598
slr1970	Slr1970	Slr1970 protein	173	19.451	1	1	4.6	1	0.0049261	2.0296	0.579427	0.513479	18.9129	19.9588	18.902	18.9369	17.9873	19.1112
slr0879	GcvH	Glycine cleavage system H protein	132	14.58	1	1	7.6	3	0	3.7072	0.577883	0.376878	19.4161	19.9879	19.1032	19.7358	17.7793	19.2585
sll0020;slr1641;slr0156	ClpC	ATP-dependent Clp protease regulatory subunit	821;872;898	91.173	3	6;2;2	7.6	12	0	25.142	0.573446	0.884118	22.2232	22.5444	23.1873	22.0711	22.2632	21.9002
sll1559	Sll1559	Soluble hydrogenase 42 kD subunit	384	40.768	1	12	34.9	50	0	83.747	0.570391	0.657849	26.3396	25.7595	25.9168	25.9236	25.63	24.7511
sll0822	Sll0822	Sll0822 protein	129	13.962	1	2	24.8	13	0	12.534	0.568787	2.81766	22.9283	22.8021	22.8954	22.1856	22.3341	22.3997
ssl0352	Ssl0352	Ssl0352 protein	58	6.5774	1	5	82.8	27	0	44.521	0.56027	0.892571	25.6694	25.2172	25.5249	25.4273	24.7068	24.5966
sll1028	CcmK2	Carboxysome shell protein CcmK2	103	11.135	1	6	85.4	41	0	65.636	0.553245	0.519086	26.7351	25.9293	26.2845	26.491	25.71	25.0882
slr0606	Slr0606	Slr0606 protein	317	34.766	1	1	3.2	4	0	3.6846	0.543442	0.44414	19.0913	20.0811	18.5193	18.8262	18.1815	19.0537
sll1234	AhcY	Adenosylhomocysteinase	425	46.213	1	6	17.4	24	0	59.906	0.543131	1.01626	24.5509	23.8541	24.3189	23.8013	23.8809	23.4122
sll1621	Sll1621	Peroxiredoxin sll1621	189	21.167	1	10	45	48	0	46.949	0.53904	0.621783	27.0108	26.4231	26.6167	26.8156	25.9774	25.6405
slr0009	CbbL	Ribulose bisphosphate carboxylase large chain	470	52.49	1	31	53.4	204	0	320.94	0.535201	1.5111	29.9103	29.8235	30.0066	29.4856	29.5764	29.0728
sll1771	Sll1771	Sll1771 protein	254	28.472	1	1	3.9	1	0.0033333	2.2286	0.534273	0.310549	19.0794	20.4884	18.4225	18.6277	18.2932	19.4664
sll7090	Sll7090	CRISPR-associated protein Cmr2 N-terminal domain-containing protein	979	111.43	1	1	0.9	1	0	2.947	0.533058	0.557938	19.0625	19.934	18.8822	19.0281	18.2158	19.0357
sll1841	OdhB	Dihydrolipoamide acetyltransferase component of pyruvate dehydrogenase complex	433	44.898	1	3	12.5	8	0	17.973	0.530989	0.130992	18.496	20.4292	22.5366	18.6163	21.7364	19.5163
slr0821	Slr0821	hypothetical protein	91	9.7249	1	3	24.2	8	0	14.083	0.508479	0.0766345	23.8442	19.995	18.3309	23.4848	18.0032	19.1566
slr2101	Slr2101	Slr2101 protein	143	15.348	1	1	6.3	3	0	2.946	0.506563	0.232756	19.0879	20.2324	18.4403	18.5951	17.6615	19.9843
sll0521	NdhG	NAD(P)H-quinone oxidoreductase chain 6	198	21.522	1	1	6.1	5	0	4.7866	0.504885	0.143839	18.9488	20.5538	18.639	18.0064	17.4482	21.1724
sll0927;chr1_302301	Sll0927	S-adenosylmethionine synthetase;chr1_302301 Hypothetical protein [341047 - 339740]	409;436	43.898	2	4;4	8.8	12	0	12.132	0.492144	1.68004	22.499	22.5292	22.1646	21.8273	22.032	21.8571
slr0659	PrlC	oligopeptidase A	713	80.296	1	2	3.5	3	0	5.2104	0.491289	0.365248	20.1612	19.8522	18.5109	18.8742	18.6853	19.4909
slr1900	Slr1900	Slr1900 protein	247	27.406	1	1	4.5	1	0	4.3396	0.491201	0.321879	18.611	20.2071	18.4756	19.0069	18.0481	18.7651
slr1463	FusA	Elongation factor G 1	695	76.749	1	20	32.8	71	0	86.108	0.489539	0.718706	25.8553	25.4272	25.5455	25.3634	25.4426	24.5534
sll0928	ApcD	Allophycocyanin subunit alpha-B	161	17.923	1	7	46.6	33	0	82.381	0.489029	0.388395	26.7747	26.222	26.3376	26.7321	26.1223	25.0129
sll0368	PyrR	Bifunctional protein PyrR	178	19.946	1	1	6.2	1	0	2.6617	0.484719	0.688577	18.9545	19.7348	19.1015	18.5975	18.536	19.2033
slr1198	Slr1198	Rehydrin	211	23.559	1	14	59.2	82	0	105.86	0.479804	1.23169	27.9263	27.7834	28.0419	27.7568	27.3623	27.1931
sll1479	Pgl	6-phosphogluconolactonase	240	26.482	1	2	8.8	7	0	7.8865	0.479612	0.131625	21.4002	19.5588	18.8047	21.6274	18.1972	18.5002
slr1986	ApcB	Allophycocyanin beta chain	161	17.215	1	13	92.5	117	0	236.54	0.475317	0.641435	31.2272	30.9415	31.0119	30.9661	30.8464	29.9421
sll0408	Sll0408	peptidyl-prolyl cis-trans isomerase	402	43.909	1	8	21.9	17	0	16.962	0.46664	0.10068	23.4429	19.882	23.0345	23.0226	22.7308	19.2062
sll0427	PsbO	Photosystem II manganese-stabilizing polypeptide	274	29.911	1	9	36.1	44	0	101.77	0.46612	0.448145	27.4794	26.8701	27.2126	27.3535	26.8606	25.9496
slr1720	AspS	Aspartate--tRNA(Asp/Asn) ligase	599	67.209	1	3	5.5	7	0	15.96	0.460676	0.317481	21.1106	21.1783	21.2503	21.271	21.3517	19.5344
slr0032	IlvE	Probable branched-chain-amino-acid aminotransferase	305	33.951	1	5	23	9	0	12.977	0.445651	0.919516	22.5601	21.8595	21.9274	21.5982	21.6818	21.73
sll0576	Sll0576	HrEpiB	312	34.951	1	5	17	21	0	29.889	0.438447	0.453194	23.9358	22.8944	22.9012	23.2694	22.5492	22.5975
sll0042	Tar	Methyl-accepting chemotaxis protein II	163	17.707	1	1	6.1	1	0	3.314	0.435272	0.349019	18.7912	19.9234	18.6791	18.766	18.0898	19.2321
slr0783	TpiA	Triosephosphate isomerase	242	26.158	1	2	11.6	10	0	8.5133	0.429476	0.177874	21.5578	20.0322	21.1611	21.7409	20.7084	19.0133
ssl1498	Ssl1498	Ssl1498 protein	61	6.3993	1	1	14.8	6	0	2.9905	0.428357	0.177902	19.2212	20.3629	18.904	19.0782	17.6766	20.4482
slr1176	GlgC	Glucose-1-phosphate adenylyltransferase	439	49.366	1	10	27.3	31	0	67.865	0.421638	0.653091	24.1534	23.7356	24.2585	23.6606	24.0336	23.1885
slr1338	Slr1338	Slr1338 protein	200	22.438	1	2	9	5	0	3.6826	0.420532	0.0860461	22.7755	20.0431	18.7063	22.5543	18.4653	19.2437
sll1213	Fcl	GDP-L-fucose synthase	312	34.719	1	7	25.3	25	0	31.605	0.418516	0.452401	24.601	23.7629	23.9556	24.2541	23.6132	23.1967
sll1837	Sll1837	Sll1837 protein	145	15.467	1	1	8.3	2	0	7.0404	0.416277	0.419865	18.901	19.9524	19.0314	18.3837	18.9733	19.279
slr0752	Eno	Enolase	432	46.528	1	9	27.1	25	0	67.374	0.416264	1.55895	25.0658	25.1033	24.8621	24.6973	24.6857	24.3994
slr1702	Slr1702	Slr1702 protein	251	27.287	1	1	5.2	2	0	2.7127	0.408203	0.453286	18.8058	19.9675	19.1412	18.6577	19.2428	18.7894
ssl0707	GlnB	Nitrogen regulatory protein P-II	112	12.397	1	10	82.1	36	0	93.975	0.407624	0.367169	26.6223	26.0845	26.3705	26.7557	25.8471	25.2516
slr1220	Slr1220	Slr1220 protein	317	36.009	1	4	12	9	0	11.182	0.4068	0.222721	21.2942	20.59	21.434	21.4446	21.2771	19.376
sll1470	LeuC	3-isopropylmalate dehydratase large subunit	468	50.458	1	4	9.2	9	0	14.689	0.406324	0.216668	21.1426	19.8158	21.5557	20.7008	21.143	19.4512
slr1890	BfrB	Bacterioferritin	176	20.226	1	1	4.5	6	0.0049342	2.0528	0.405362	0.154023	18.7914	20.2828	18.8009	18.7621	17.4805	20.4164
ssr1480;sll0517;chr1_175592	Ssr1480	RNA-binding protein	83;101;140	9.3904	3	3;3;3	14.5	17	0	7.4552	0.404765	0.375397	23.9289	24.33	24.0393	24.2156	24.0399	22.8284
slr1322	Slr1322	Metalloprotease slr1322	489	53.129	1	1	2	1	0	2.6918	0.399696	0.201904	18.8909	20.3035	18.67	19.6557	17.7831	19.2265
slr7083	Slr7083	Chromosome partition protein Smc	377	42.55	1	1	3.4	1	0.0016807	2.3357	0.383312	0.364276	19.0411	19.7221	18.5193	18.5924	18.3175	19.2227
slr2067	ApcA	Allophycocyanin alpha chain	161	17.412	1	11	78.3	113	0	323.31	0.381932	0.403766	31.945	31.2979	31.7506	31.8596	31.3436	30.6446
sll0144	PyrH	Uridylate kinase	260	27.651	1	1	4.2	1	0	3.2358	0.37981	0.151184	19.0846	20.2154	18.7494	20.3122	17.466	19.1318
sll0550	Dfa1	Diflavin flavoprotein A 1	573	63.505	1	4	6.1	8	0	8.0832	0.378337	0.0974443	19.1452	22.5312	22.6412	21.7946	21.8967	19.4913
sll1342	Sll1342	NAD(P)-dependent glyceraldehyde-3-phosphate dehydrogenase	337	36.492	1	18	54.6	81	0	185.43	0.377389	1.06349	27.4105	27.0493	27.2939	27.0496	26.948	26.6238
sll0504	LysA	Diaminopimelate decarboxylase	469	50.847	1	2	7.2	3	0	8.5842	0.376049	0.170255	18.7284	20.3006	18.5246	19.7341	17.6364	19.0551
sll0577	Sll0577	Sll0577 protein	169	17.839	1	1	8.9	3	0	13.56	0.373275	0.234652	18.9688	20.3198	19.1178	18.3941	19.9508	18.9416
slr0525	ChlM	Magnesium-protoporphyrin O-methyltransferase	230	25.08	1	1	4.8	1	0	3.9817	0.37138	0.266243	18.6715	20.1092	18.2965	18.6168	18.7976	18.5485
sll1306	Sll1306	Sll1306 protein	335	38.27	1	2	5.7	8	0	10.356	0.367156	0.160138	22.131	19.792	21.6591	21.5533	21.008	19.9194
sll1226;chr1_242478	HoxH	Hydrogenase large subunit	474;502	52.917	2	2;2	4	4	0	4.2605	0.363576	0.212057	19.2034	20.3107	18.3576	18.7014	18.4657	19.6139
slr2075	GroES	Co-chaperonin GroES	103	10.859	1	9	79.6	49	0	123.87	0.357118	0.81686	27.0425	26.5958	26.922	26.6991	26.5915	26.1983
sll1106	Sll1106	Sll1106 protein	171	18.031	1	4	32.7	15	0	18.704	0.350883	0.706281	24.2297	24.7092	24.6555	24.1688	24.4782	23.8947
sll1525	Sll1525	phosphoribulokinase	332	37.914	1	12	40.7	60	0	98.113	0.346596	0.80902	26.3515	25.7866	25.8915	25.8165	25.6864	25.487
sll1757	Sll1757	Sll1757 protein	292	31.717	1	1	3.8	3	0	4.5579	0.341407	0.294778	19.3629	19.981	18.6839	18.5971	19.5459	18.8605
sll0520	NdhI	NAD(P)H-quinone oxidoreductase subunit I	193	22.15	1	12	48.2	55	0	40.274	0.334763	1.1169	25.9384	26.0163	26.1325	25.842	25.804	25.4369
slr0657	LysC	aspartate kinase	600	63.533	1	1	1.8	1	0	2.8729	0.334586	0.160154	19.061	20.3248	18.375	19.1636	17.8903	19.7033
slr0261;chr1_66945	Slr0261	NADH dehydrogenase subunit 7;chr1_66945 Hypothetical protein [1509984 - 1511171]	384;396	44.347	2	13;13	32.8	46	0	63.432	0.333785	1.56711	25.9337	25.9873	26.1872	25.8099	25.696	25.601
slr0012	CbbS	Ribulose bisphosphate carboxylase small subunit	113	13.239	1	6	62.8	47	0	109.86	0.333578	1.95057	29.2023	29.1935	29.1196	28.9322	28.8815	28.701
sll0629	Sll0629	alternative photosystem I reaction center subunit X	128	13.718	1	2	8.6	9	0	6.5074	0.330627	0.0641179	23.3287	19.9666	22.7364	18.7532	23.241	23.0456
sll1526	Sll1526	Uncharacterized protein sll1526	506	57.726	1	4	7.7	8	0	6.9866	0.327869	0.14937	21.3297	20.067	21.4917	21.2704	21.3637	19.2707
slr1718	ComB	Probable 2-phosphosulfolactate phosphatase	241	26.045	1	2	9.5	3	0	4.3881	0.32063	0.205854	19.0235	20.1105	19.0797	19.8969	18.2117	19.1433
sll0080	ArgC	N-acetyl-gamma-glutamyl-phosphate reductase	351	38.209	1	1	2.6	4	0	3.2542	0.29522	0.163897	18.7929	20.1173	18.7723	18.1907	19.9131	18.693
slr1240	Slr1240	Slr1240 protein	179	21.06	1	1	5	3	0	5.1376	0.287256	0.181507	19.1959	19.959	18.3251	19.4095	18.1521	19.0566
ssr3383	Ssr3383	phycobilisome small core linker polypeptide	67	7.8051	1	7	79.1	30	0	36.678	0.283838	0.168005	26.3231	26.0886	26.9953	27.3078	25.853	25.3946
slr0335	ApcE	Phycobiliprotein ApcE	896	100.29	1	45	56.8	214	0	323.31	0.282356	0.652126	28.2273	28.3353	28.5928	28.3488	28.1652	27.7943
slr0952	Fbp	Fructose-1,6-bisphosphatase class 1	347	38.262	1	2	6.1	4	0	4.2653	0.279401	0.243475	18.9637	19.9884	18.7169	18.4997	19.0493	19.2818
sll0421	PurB	Adenylosuccinate lyase	431	48.42	1	6	13.7	12	0	18.439	0.278919	0.296596	22.476	21.6881	22.2519	22.0286	22.2755	21.2751
slr0228	FtsH2	ATP-dependent zinc metalloprotease FtsH 2	627	68.495	1	8	16.3	21	0	31.226	0.278259	0.337948	23.1163	22.9276	23.7746	23.3023	23.1206	22.5609
sll1746	RplL	50S ribosomal protein L7/L12	128	13.259	1	7	59.4	32	0	81.458	0.275668	0.772199	27.941	27.7453	27.7048	27.7987	27.4692	27.2962
ssl3441	Ssl3441	initiation factor IF-1	67	7.736	1	2	17.9	6	0	3.7802	0.272348	0.171376	18.4825	19.9613	18.6571	19.1774	18.0048	19.1016
sll0735	Sll0735	Sll0735 protein	529	62.075	1	2	3.2	4	0	4.4667	0.264017	0.0640169	18.556	21.9475	18.8439	21.2023	17.961	19.3921
slr1106	Phb	Prohibitin	282	30.569	1	7	27	23	0	21.718	0.261988	0.416317	23.213	22.7184	23.1804	22.4911	23.1969	22.6378
slr1459	ApcF	Allophycocyanin subunit beta-18	169	18.892	1	9	58	58	0	119.18	0.24762	0.37332	26.9014	26.1029	26.3731	26.4832	26.1828	25.9686
slr0084	HisH	Imidazole glycerol phosphate synthase subunit HisH	210	22.497	1	1	3.3	1	0.0065359	1.932	0.245753	0.0971525	18.7228	20.1566	18.5794	18.5963	17.7869	20.3384
slr1623	NdhM	NAD(P)H-quinone oxidoreductase subunit M	121	14.078	1	6	57.9	23	0	23.377	0.243425	0.473173	24.0582	24.4298	24.2777	23.8593	24.3993	23.7769
slr1854	Slr1854	Slr1854 protein	198	22.293	1	6	40.4	13	0	21.567	0.240888	0.330213	23.0023	22.5744	23.0599	22.9407	22.8493	22.1239
sll1341	BfrA	Bacterioferritin	156	18.331	1	1	5.1	5	0	2.4415	0.238146	0.151425	18.764	20.0946	18.4735	18.7414	18.4157	19.4606
slr0613	Slr0613	Slr0613 protein	173	18.297	1	1	5.8	3	0	3.7377	0.233151	0.155781	19.0537	20.2455	18.4429	18.6651	19.0927	19.2849
sll1463	FtsH4	ATP-dependent zinc metalloprotease FtsH 4	628	68.198	1	5	9.4	8	0	15.891	0.23216	0.0605575	21.7907	19.9984	22.17	22.1538	22.3161	18.7927
sll1830	Sll1830	Sll1830 protein	358	39.648	1	4	10.3	14	0	16.584	0.226311	0.85256	22.3088	22.2892	22.5796	22.0914	22.0807	22.3265
sll1734	Sll1734	Sll1734 protein	431	50.038	1	11	26.9	41	0	64.085	0.22541	1.12296	25.8261	25.9623	26.0872	25.7311	25.8325	25.6358
slr1938	MtnA	Methylthioribose-1-phosphate isomerase	351	38.281	1	1	2.8	1	0.0016722	2.2781	0.217719	0.0903861	19.1328	20.2723	18.8069	20.6007	18.1415	18.8166
sll0470	Sll0470	Sll0470 protein	186	20.719	1	1	7.5	3	0	3.1316	0.216913	0.172566	18.932	20.0816	18.7947	18.5781	19.3936	19.1858
slr1846	Slr1846	Uncharacterized monothiol glutaredoxin ycf64-like	107	11.94	1	1	10.3	3	0	3.5653	0.21366	0.0928408	18.8083	20.4994	18.3254	18.0449	19.6701	19.2772
ssl1690	NdhO	NAD(P)H-quinone oxidoreductase subunit O	72	8.2885	1	4	65.3	17	0	78.467	0.213109	0.491671	25.268	25.255	25.5832	25.2316	25.3788	24.8565
slr1022	ArgD	Acetylornithine aminotransferase	429	46.567	1	1	2.8	4	0	7.1151	0.212255	0.172276	18.9209	20.1322	18.6148	18.9897	18.9315	19.1099
sll0554	FtrC	Ferredoxin-thioredoxin reductase, catalytic chain	118	13.39	1	1	6.8	6	0	3.567	0.203457	0.0777334	18.9153	20.1754	18.9019	18.825	17.8839	20.6734
slr1281	NdhJ	NAD(P)H-quinone oxidoreductase subunit J	179	20.593	1	4	17.3	24	0	24.326	0.202444	0.362795	24.091	24.4111	24.792	24.3429	24.3446	23.9994
ssl0020	PetF	Ferredoxin-1	97	10.363	1	1	7.2	5	0	2.4901	0.20031	0.0949513	18.8384	20.2584	18.0695	19.0511	18.0912	19.423
slr1847	Slr1847	Nucleoid-associated protein slr1847	114	12.135	1	6	48.2	15	0	24.67	0.197182	0.271324	24.5068	23.5176	23.9672	23.7565	23.9088	23.7347
slr1643	PetH	Ferredoxin--NADP reductase	413	46.359	1	18	55.9	67	0	151.4	0.195627	0.610837	26.9733	26.9095	27.2357	27.0495	26.76	26.7222
slr0695	Slr0695	Slr0695 protein	173	19.049	1	1	5.2	2	0	2.4272	0.189487	0.111919	18.8089	19.8	18.5113	17.9751	19.6027	18.9739
sll0319	Sll0319	Sll0319 protein	297	32.315	1	1	3.7	1	0	3.7628	0.185201	0.107234	18.9473	20.255	18.4609	18.5445	19.6338	18.9292
sll0755	Sll0755	Putative peroxiredoxin sll0755	200	22.509	1	1	3.5	4	0	2.8566	0.179703	0.212704	19.0828	19.7956	19.0679	18.8012	19.559	19.0469
sll1327	AtpG	ATP synthase gamma chain	314	34.605	1	8	34.7	30	0	113.49	0.168963	0.509458	24.9909	25.0436	25.4129	24.8856	25.0884	24.9665
sll0643	UreG	Urease accessory protein UreG	206	22.012	1	1	5.3	3	0	2.5851	0.165449	0.102909	18.6616	20.0446	18.1664	18.5243	18.9714	18.8806
sll1214	AcsF1	Magnesium-protoporphyrin IX monomethyl ester [oxidative] cyclase 1	358	42.153	1	1	3.4	2	0	4.328	0.156452	0.0865273	18.4253	19.7905	18.2941	18.7647	17.901	19.3748
sll1450	NrtA	Nitrate/nitrite binding protein NrtA	446	48.966	1	9	25.1	39	0	62.887	0.155053	0.150927	24.7657	24.1544	24.5616	24.813	24.52	23.6835
sll1270	GlnH/glnP	Glutamine-binding periplasmic protein/glutamine transport system permease protein	530	57.68	1	1	2.8	1	0	9.0424	0.137402	0.0630155	18.7956	20.4489	18.7424	18.4324	20.162	18.9802
ssl1046	Ssl1046	Ssl1046 protein	84	9.1387	1	1	13.1	2	0	4.3941	0.137248	0.0514929	19.0457	20.0909	18.3179	18.5759	17.9761	20.4907
sll1735	Sll1735	Uncharacterized protein sll1735	133	14.105	1	5	68.4	23	0	49.181	0.133705	0.411149	26.1818	26.3385	26.1867	26.3498	25.9208	26.0353
slr1165	Sat	Sulfate adenylyltransferase	390	43.695	1	6	16.9	17	0	20.072	0.129262	0.173493	22.802	22.513	22.5713	22.5611	22.9299	22.0075
slr1159	PurD	Phosphoribosylamine--glycine ligase	419	44.016	1	1	2.9	1	0	4.5278	0.127008	0.0666477	18.98	20.0858	18.4829	19.6528	18.1375	19.3773
slr2051	CpcG	Phycobilisome rod-core linker polypeptide CpcG	249	28.901	1	21	78.3	117	0	293.71	0.126694	0.208596	29.1525	28.9536	29.4409	29.363	29.089	28.7149
sll1471	CpcL	Photosystem I-associated linker protein CpcL	249	28.522	1	11	42.2	40	0	51.215	0.123313	0.171632	25.1742	24.6573	25.4581	25.2065	24.9828	24.7303
slr1280	NdhK1	NAD(P)H-quinone oxidoreductase subunit K 1	248	27.345	1	12	50.8	62	0	91.57	0.122117	0.356071	26.7391	27.1685	27.0331	26.8599	26.9708	26.7436
slr1273	Slr1273	Slr1273 protein	146	15.714	1	2	15.8	6	0	5.0842	0.118289	0.0448424	18.7571	20.1527	18.114	19.3899	17.5616	19.7174
sll1363	Sll1363	ketol-acid reductoisomerase	367	39.951	1	13	36.8	50	0	78.267	0.115835	0.746675	25.7322	25.7127	25.7433	25.6904	25.6779	25.4724
slr1756	Slr1756	glutamate--ammonia ligase	473	52.999	1	18	45.9	94	0	203.71	0.106497	0.348588	27.5311	27.5834	27.7605	27.629	27.6202	27.3064
sll1578;chr1_284463	CpcA	C-phycocyanin alpha subunit	162;174	17.586	2	15;14	93.8	191	0	323.31	0.0974795	0.155986	33.0376	32.8146	33.0747	33.2395	32.913	32.482
slr2001	CphB	Cyanophycinase	271	29.389	1	1	4.8	5	0	5.3303	0.0968692	0.0527804	19.0451	19.7356	18.5959	18.056	19.9129	19.117
sll1796	PetJ	Cytochrome c6	120	12.463	1	1	7.5	4	0	11.248	0.0890141	0.0610627	19.0218	20.0627	18.5698	18.8973	19.6203	18.8696
chr1_89481	Chr1_89481	Hypothetical protein [2012718 - 2013482]	255	28.702	1	1	4.7	1	0.0081301	1.8278	0.0878862	0.0459682	19.0697	19.769	18.939	19.8296	17.9714	19.7129
sll0947	Hpf	Ribosome hibernation promotion factor	191	21.895	1	7	58.1	25	0	54.315	0.082187	0.085	23.3892	24.359	24.1893	24.1133	24.0099	23.5677
sll1325	AtpH	ATP synthase subunit delta	185	20.093	1	4	23.8	18	0	18.867	0.0816263	0.26299	23.7973	23.9861	24.0941	23.7347	24.0391	23.8588
sll0601	Nit1	Deaminated glutathione amidase	272	30.191	1	2	9.2	6	0	4.7241	0.0812073	0.0350544	19.1533	19.6471	18.6188	18.8172	17.9405	20.4178
slr0942	Slr0942	Aldo/keto reductase slr0942	327	36.014	1	1	4	4	0	7.2947	0.0773493	0.0313307	18.6186	20.0091	18.1762	20.0776	18.035	18.4593
slr2024;chr1_34160	Slr2024	CheY subfamily	180;203	20.233	2	2;2	11.1	5	0	2.8939	0.0733191	0.0545315	18.7777	20.0409	18.9442	18.7845	19.6155	19.1429
ssr1600	Ssr1600	similar to anti-sigma f factor antagonist	116	12.661	1	1	9.5	5	0	8.286	0.0660559	0.0327241	18.686	19.7658	19.0314	18.9574	18.1275	20.2001
ssl1918	Ssl1918	Ssl1918 protein	97	11.332	1	1	7.2	5	0.0016835	2.347	0.0649204	0.0242996	18.8737	19.7461	18.0859	20.1864	17.5781	18.7464
ssr2857	Ssr2857	Ssr2857 protein	64	6.6855	1	1	17.2	4	0	5.3192	0.0642166	0.0218592	19.2636	19.809	18.7402	20.7889	17.5672	19.264
slr0073	Slr0073	Sensory transduction histidine kinase	315	35	1	1	2.5	3	0	2.6517	0.0600166	0.0311276	18.7098	20.247	18.1941	18.8937	18.6942	19.3829
slr1512	Slr1512	Slr1512 protein	374	39.647	1	6	14.7	28	0	61.676	0.058904	0.0336997	24.8102	24.6189	24.9085	25.3853	25.2201	23.5556
sll1338	Sll1338	Sll1338 protein	187	20.183	1	1	7.5	5	0	3.0495	0.0544529	0.0417611	18.9085	20.0383	18.6628	18.8817	19.2817	19.2828
slr0738	TrpE	Anthranilate synthase component 1	508	57.146	1	1	1.8	2	0	2.8841	0.0509478	0.0321382	18.9882	19.8666	18.5174	19.6679	18.4244	19.1271
slr2049	CpcS2	Chromophore lyase CpcS/CpeS 2	192	21.946	1	1	5.7	2	0	3.9059	0.0507361	0.0291973	18.9484	19.7325	18.4723	19.5817	18.1047	19.3146
sll1356	GlgP	Glycogen phosphorylase	849	96.648	1	6	7.2	12	0	16.393	0.0464827	0.0151079	21.2575	19.5088	21.6303	21.5464	21.5219	19.1889
slr1645	Slr1645	photosystem II 11 kD protein	135	14.917	1	4	49.6	17	0	15.86	0.0366224	0.236994	23.8331	23.7286	23.855	23.8102	23.6758	23.8207
sll1580	CpcC1	Phycobilisome 32.1 kDa linker polypeptide, phycocyanin-associated, rod 1	291	32.52	1	15	59.1	104	0	225.4	0.0359586	0.0676404	29.5389	29.3245	29.8487	29.7346	29.4971	29.3725
slr2023	FabD	Malonyl CoA-acyl carrier protein transacylase	293	31.49	1	1	3.4	3	0	5.4242	0.0279999	0.0102532	18.9226	20.2237	18.9461	20.851	18.1866	18.9708
sll0851	PsbC	Photosystem II CP43 reaction center protein	460	50.302	1	12	29.1	62	0	159.25	0.017568	0.0541766	27.0323	27.3009	27.379	27.1712	27.1928	27.2955
sll1130	Sll1130	Sll1130 protein	115	12.933	1	6	62.6	28	0	26.545	0.0152721	0.0220252	24.9663	24.8011	24.9338	25.2539	24.9266	24.4749
sll1805	RplP	50S ribosomal protein L16	139	16.035	1	3	26.6	14	0	11.085	-0.000361125	0.000454619	22.9595	23.5607	23.7826	23.3643	23.3434	23.5962
sll0923	EpsB	Exopolysaccharide export protein	756	83.64	1	1	1.1	2	0	3.7702	-0.000567754	0.000428572	18.5297	19.9912	19.0217	19.2407	19.2112	19.0925
slr1329	AtpD	ATP synthase subunit beta	483	51.732	1	20	65	127	0	244.76	-0.00988579	0.0369901	28.9589	28.9446	28.9287	29.1037	28.7921	28.9661
smr0010	PetG	Cytochrome b6-f complex subunit 5	38	4.175	1	1	21.1	5	0	3.2946	-0.0192636	0.0057976	18.9721	19.8898	18.4172	18.5141	17.7563	21.0664
sll1275	Pyk2	Pyruvate kinase 2	591	62.985	1	1	2	2	0	7.0937	-0.0307643	0.0148092	18.929	20.0544	18.7578	18.6386	20.3831	18.8117
sll1326	AtpA	ATP synthase subunit alpha	503	53.965	1	21	45.7	121	0	266.71	-0.0327943	0.184094	28.3058	28.3997	28.4857	28.3468	28.4475	28.4953
ssl3093	CpcD	Phycobilisome 8.9 kDa linker polypeptide, phycocyanin-associated, rod	83	9.3222	1	8	96.4	75	0	172	-0.0334638	0.0579757	27.8278	27.6132	28.105	28.132	27.8667	27.6477
slr1857	GlgX	1,4-alpha-glucan branching enzyme	707	79.894	1	2	2.4	3	0	4.2175	-0.035387	0.0100064	18.7606	19.7974	18.5178	18.3191	17.6433	21.2195
slr2076	GroEL1	Chaperonin GroEL 1	541	57.652	1	42	66	205	0	323.31	-0.0405038	0.170569	28.9883	29.2013	29.2813	29.2351	29.1921	29.1652
slr1719	Slr1719	DrgA protein homolog	201	22.758	1	6	36.3	21	0	48.331	-0.0420272	0.0965014	24.5535	24.4034	24.7387	24.4093	24.8298	24.5826
sll1745	RplJ	50S ribosomal protein L10	173	18.675	1	2	13.9	6	0	10.764	-0.0442549	0.00832456	18.9429	22.617	22.353	18.7761	22.6971	22.5724
sll1750;chr1_292135	UreC	Urease subunit alpha	569;587	61.037	2	2;2	4.2	4	0	4.2737	-0.0591818	0.0332236	18.7915	19.7732	18.7219	19.0541	18.3494	20.0607
sll1163	Sll1163	Sll1163 protein	135	14.769	1	1	5.9	1	0.0097403	1.8095	-0.0640596	0.0367953	18.9197	20.0952	19.0497	18.8075	20.3151	19.1343
sll1577	CpcB	C-phycocyanin beta subunit	172	18.126	1	16	83.7	232	0	323.31	-0.0648759	0.0784236	32.5862	32.138	32.2721	32.6976	32.6131	31.8803
sll1867;slr1311;slr1181	PsbA2	Photosystem II protein D1 2	360;360;360	39.721	3	6;6;3	20.3	31	0	63.056	-0.0740859	0.143885	26.2497	25.6421	25.7449	25.9159	25.9192	26.0239
slr1367	GlgP	Alpha-1,4 glucan phosphorylase	855	98.304	1	2	2.2	4	0	6.0379	-0.0761801	0.0352264	18.2671	19.987	18.2971	18.1099	18.9649	19.7049
slr2034	Ycf48	Photosystem II assembly lipoprotein Ycf48	342	37.29	1	5	14.9	16	0	18.699	-0.0830841	0.131063	21.8056	21.7754	22.3722	22.154	22.2347	21.8137
slr1600	Slr1600	Slr1600 protein	149	17.13	1	1	7.4	3	0	4.857	-0.0833855	0.0555796	18.4471	19.7231	18.3942	18.4173	19.3851	19.0121
slr0528;chr1_141269	MurE	UDP-N-acetylmuramoyl-L-alanyl-D-glutamate--2,6-diaminopimelate ligase	505;560	54.6	2	1;1	2.4	1	0	2.865	-0.0915286	0.0503503	18.7019	20.1035	18.2634	18.8667	18.7919	19.6849
slr1513	Slr1513	Membrane-associated protein slr1513	110	12.007	1	8	55.5	51	0	79.248	-0.100342	0.156187	27.8094	27.7392	27.8427	28.2688	27.9711	27.4524
slr1992	Gpx2	Hydroperoxy fatty acid reductase Gpx2	154	16.646	1	2	14.9	3	0	5.6237	-0.100985	0.0515065	18.764	20.1125	18.5076	18.3995	19.9659	19.3215
sll0274	Sll0274	Sll0274 protein	196	21.473	1	2	11.7	5	0	6.3885	-0.106891	0.034193	19.0169	20.1631	18.7743	21.267	17.9998	19.0082
slr0435	AccB	Biotin carboxyl carrier protein of acetyl-CoA carboxylase	154	16.313	1	1	5.2	4	0	2.8259	-0.114848	0.0454775	19.1406	20.5627	18.5894	20.7137	18.5427	19.3808
sll0416	GroEL2	Chaperonin GroEL 2	552	57.774	1	30	61.8	138	0	279.46	-0.118684	0.434348	27.997	28.2982	28.3752	28.3108	28.3775	28.3381
sll1783	Sll1783	Uncharacterized protein sll1783	147	16.822	1	1	8.8	3	0	9.0528	-0.118988	0.0912858	19.0359	19.7471	18.3697	18.6913	19.381	19.4373
slr0927;sll0849	PsbD	Photosystem II D2 protein	352;352	39.492	2	5;5	18.5	24	0	37.202	-0.119703	0.974965	25.885	25.9926	25.8455	26.094	26.0224	25.9658
sll1789	RpoC2	DNA-directed RNA polymerase subunit beta	1317	144.78	1	11	8.1	39	0	42.645	-0.122829	0.236307	23.9062	24.2688	24.2264	23.9197	24.3942	24.4559
slr0906	PsbB	Photosystem II CP47 reaction center protein	507	55.902	1	12	30	57	0	124.62	-0.12495	0.425499	26.7812	27.0168	27.0292	26.9993	27.2568	26.9459
sll1824	Sll1824	50S ribosomal protein L25	118	13.442	1	5	42.4	15	0	13.642	-0.126772	0.182792	23.5869	23.4548	24.2887	23.814	23.8977	23.9989
slr2097	GlbN	Group 1 truncated hemoglobin GlbN	124	13.867	1	1	10.5	4	0	7.5501	-0.133676	0.0467185	18.4044	19.9941	18.2596	20.3494	17.5647	19.1451
sll1891	Sll1891	Sll1891 protein	252	26.435	1	1	5.2	3	0	2.8797	-0.134581	0.0672375	18.56	20.5467	18.5985	19.0019	19.8198	19.2872
sll0689	NhaS3	High-affinity Na(+)/H(+) antiporter NhaS3	461	47.871	1	1	1.5	4	0.0016779	2.3202	-0.146902	0.140815	19.3209	19.8328	18.7972	19.1311	19.9409	19.3195
sll0422	Sll0422	Isoaspartyl peptidase/L-asparaginase	329	34.894	1	3	10.6	7	0	12.101	-0.149016	0.0875687	18.8814	19.9961	18.827	18.749	20.2998	19.1027
ssl3044	Ssl3044	Hydrogenase component	99	10.818	1	1	12.1	4	0	5.1813	-0.155021	0.100093	18.5223	20.129	18.8334	18.8372	19.7248	19.3878
slr0245	Slr0245	Uncharacterized protein slr0245	304	33.649	1	2	6.6	2	0	7.7197	-0.155081	0.0500946	18.7871	20.1664	18.0643	18.5311	18.0791	20.8728
sll1818	RpoA	DNA-directed RNA polymerase subunit alpha	314	35.003	1	6	19.4	25	0	29.611	-0.155177	0.490634	23.4166	23.6461	23.6561	23.5255	23.741	23.9179
ssl0563	PsaC	Photosystem I iron-sulfur center	81	8.8282	1	6	65.4	20	0	42.058	-0.157486	0.380843	28.2444	28.2203	28.6053	28.2719	28.6433	28.6273
sll0945	GlgA1	Glycogen synthase 1	477	54.346	1	1	1.9	2	0	4.3731	-0.172429	0.0881143	19.073	19.9454	18.9096	18.6567	20.688	19.1006
sll0819	PsaF	Photosystem I reaction center subunit III	165	18.249	1	9	46.1	59	0	103.63	-0.174708	0.396025	28.6821	29.0287	29.285	29.2558	29.0448	29.2193
ssr2799	RpmA	50S ribosomal protein L27	87	9.4485	1	4	41.4	13	0	16.398	-0.17564	0.237232	23.274	23.9833	23.8363	23.489	24.0058	24.1257
ssl2874	Ssl2874	Putative regulatory protein ssl2874	89	9.8693	1	2	15.7	9	0	10.43	-0.176796	0.263462	21.2509	21.3593	21.7536	21.2059	21.9407	21.7476
slr1128	Slr1128	Uncharacterized protein slr1128	321	35.727	1	4	13.1	20	0	27.401	-0.203796	0.316063	22.4996	22.4004	22.8015	23.0765	22.9268	22.3096
slr1835	PsaB	Photosystem I P700 chlorophyll a apoprotein A2	731	81.291	1	9	11.4	49	0	132.05	-0.204556	0.470206	27.546	27.5129	27.9152	27.7823	27.6752	28.1303
slr0447	AmiC	Negative aliphatic amidase regulator	446	48.359	1	5	18.8	25	0	47.187	-0.204936	0.178577	24.0964	24.0323	24.3634	25.0261	24.5049	23.5759
sll1579	CpcC2	Phycobilisome 32.1 kDa linker polypeptide, phycocyanin-associated, rod 2	273	30.797	1	15	51.3	88	0	157.7	-0.21266	0.278354	28.1974	28.4374	29.186	28.9659	28.713	28.7799
slr1417	Slr1417	Uncharacterized protein slr1417	118	12.929	1	1	8.5	1	0	2.5708	-0.220982	0.128701	18.8896	19.8624	18.4043	18.6234	20.1667	19.0292
sll0227	Sll0227	Probable peptidyl-prolyl cis-trans isomerase sll0227	246	26.58	1	4	26	12	0	14.166	-0.223949	0.0817798	22.529	20.1419	23.1427	22.3471	22.5898	21.5485
sll1336	Sll1336	Sll1336 protein	705	78.327	1	2	2.7	5	0	8.0522	-0.227685	0.138511	18.8045	20.3043	18.5629	18.9705	19.9025	19.4817
slr0737	PsaD	Photosystem I reaction center subunit II	141	15.644	1	11	57.4	54	0	84.592	-0.230571	0.658244	29.0707	29.2878	29.5886	29.4966	29.4938	29.6483
slr1655	PsaL	Photosystem I reaction center subunit XI	157	16.624	1	4	30.6	36	0	68.751	-0.232014	0.631742	27.9586	27.8312	28.0309	27.9939	28.0422	28.4807
slr1834	Slr1834	P700 apoprotein subunit Ia	751	82.935	1	14	14.5	60	0	82.743	-0.239052	0.891326	28.7122	28.5225	28.9461	28.9864	28.9953	28.9162
sll1323	AtpF2	ATP synthase subunit b	143	16.245	1	7	49.7	16	0	61.242	-0.245074	1.00963	25.4066	25.1406	25.4161	25.6991	25.5345	25.4649
ssr2831	PsaE	Photosystem I reaction center subunit IV	74	8.145	1	6	83.8	34	0	204.06	-0.248585	0.933767	28.2115	28.1268	28.4265	28.5327	28.3407	28.6372
slr1116	Slr1116	Slr1116 protein	173	20.103	1	1	5.2	6	0	4.9706	-0.258309	0.0594189	19.1069	20.2535	18.496	18.3521	17.9166	22.3625
sll0712	CysM	Cysteine synthase	325	34.734	1	1	3.1	4	0	5.5709	-0.261087	0.234118	19.0563	19.6254	18.5081	18.8545	19.8725	19.2461
slr1886	RsfS	Ribosomal silencing factor RsfS	154	17.09	1	1	5.2	3	0	2.7695	-0.269168	0.0841087	18.8479	20.388	18.1981	18.611	18.3645	21.266
sll0172	Sll0172	Sll0172 protein	152	16.347	1	2	17.1	3	0	6.8781	-0.277157	0.11382	18.734	19.6019	18.4489	20.3208	17.6238	19.6718
slr0637	Slr0637	Slr0637 protein	261	29.017	1	1	4.2	1	0	2.5209	-0.277798	0.294144	19.0017	19.8548	18.561	19.3243	19.4694	19.4572
slr1469	RnpA	Ribonuclease P protein component	124	14.498	1	2	16.9	2	0	3.0892	-0.283609	0.0973082	18.7973	20.2191	18.6332	18.8414	18.3525	21.3066
slr0710	GdhA	NADP-specific glutamate dehydrogenase	428	47.312	1	3	14	6	0	4.5942	-0.286512	0.110553	18.6477	20.7158	18.4593	19.1315	20.7418	18.809
chr1_309173	Chr1_309173	Hypothetical protein [179192 - 179139]	18	1.9663	1	1	55.6	4	0	2.5618	-0.301459	0.134435	18.5523	20.0184	18.7248	18.8448	18.593	20.7621
slr0041;chr1_140658	CmpB	Bicarbonate transport system permease protein CmpB	280;288	31.023	2	1;1	3.2	2	0	3.1509	-0.307492	0.17409	18.734	20.1791	18.4643	18.8738	20.2214	19.2047
slr1826	Slr1826	hypothetical protein	130	14.322	1	1	7.7	4	0	5.7539	-0.318207	0.287277	18.6668	19.6376	18.3299	19.0115	19.6256	18.9519
smr0006	PsbF	Cytochrome b559 subunit beta	44	4.9328	1	1	38.6	14	0	33.85	-0.328474	0.517141	24.4284	23.8607	23.6538	24.1413	24.1674	24.6196
sml0006	RpmJ	50S ribosomal protein L36	38	4.4555	1	1	26.3	5	0	4.0108	-0.333788	0.190099	18.1666	20.2631	18.59	19.228	19.7383	19.0548
sll0853	CpcS1	Chromophore lyase CpcS/CpeS 1	186	21.213	1	2	10.8	2	0	4.0344	-0.350321	0.164353	18.66	19.8941	18.1692	18.1676	20.303	19.3037
sll1787	RpoB	DNA-directed RNA polymerase subunit beta	1102	123.36	1	10	10.6	27	0	28.261	-0.353565	0.87815	22.6404	23.0209	23.2389	23.268	23.2384	23.4544
sll1769	Sll1769	Thylakoid protein sll1769	105	11.558	1	1	8.6	4	0	2.9219	-0.354936	0.194512	19.0919	19.8027	18.4805	18.8509	20.653	18.936
sll1030	CcmL	Carboxysome shell vertex protein CcmL	100	10.638	1	1	10	3	0	3.8676	-0.356343	0.159457	18.812	20.4141	18.5378	18.8052	20.7852	19.2426
sll1282	RibH	6,7-dimethyl-8-ribityllumazine synthase	164	17.617	1	4	28.7	11	0	7.2333	-0.360661	1.88985	23.103	23.2204	23.3013	23.6224	23.4459	23.6383
slr0670	Slr0670	Slr0670 protein	291	32.676	1	2	8.6	4	0	7.7681	-0.373636	0.163949	18.7509	19.9921	18.1811	18.5476	20.6805	18.8168
slr2072	IlvA	L-threonine dehydratase	508	56.545	1	8	21.9	27	0	38.564	-0.37475	0.69956	22.5334	22.3226	22.1263	22.7696	22.3023	23.0346
slr0628	RpsN	30S ribosomal protein S14	100	11.854	1	3	25	9	0	6.5068	-0.430949	1.20295	23.0762	23.2832	23.2638	23.3457	23.8723	23.6981
slr1342	Slr1342	Slr1342 protein	445	48.519	1	1	1.8	3	0.0033278	2.2207	-0.431633	0.251729	18.8844	19.9442	18.2251	18.5732	20.1311	19.6443
sll1810	RplF	50S ribosomal protein L6	179	19.666	1	9	57.5	50	0	101	-0.43294	1.02421	25.1622	25.3491	25.6633	25.6658	25.7163	26.0913
slr1140	Slr1140	3-amino-5-hydroxybenzoic acid synthase	378	41.559	1	11	38.6	40	0	102.94	-0.444846	0.423878	25.1429	24.9113	24.7936	25.2115	24.747	26.2238
slr0808	RimM	Ribosome maturation factor RimM	185	20.715	1	4	16.2	18	0	20.944	-0.480743	1.0292	23.1695	23.6333	23.7271	23.9334	23.7898	24.2489
slr1274	PilM	Membrane protein	367	40.879	1	1	2.5	2	0	3.0978	-0.480762	0.281119	18.6686	20.174	18.5085	19.3472	20.4515	18.9946
slr0342	PetB	Cytochrome b6	222	25.054	1	1	5.4	1	0	10.815	-0.493938	0.213846	18.8937	20.2996	18.5654	18.6969	21.131	19.4125
sll1260	RpsB	30S ribosomal protein S2	269	30.15	1	8	24.2	38	0	43.475	-0.497626	1.85551	25.3455	25.4659	25.6154	25.9114	25.8578	26.1505
slr1096	LpdA	Dihydrolipoyl dehydrogenase	474	50.832	1	2	8.2	3	0	4.6978	-0.506405	0.146019	19.0194	20.1046	18.1144	21.8016	17.9215	19.0344
sll0158	GlgB	1,4-alpha-glucan branching enzyme GlgB	770	89.526	1	19	30.3	80	0	152.74	-0.514294	2.10766	26.7568	26.9924	26.753	27.2178	27.3836	27.4437
sll1096	RpsL	30S ribosomal protein S12	126	14.176	1	6	48.4	24	0	90.453	-0.535577	1.59642	26.1827	26.5722	26.5287	26.7985	26.9748	27.117
ssr1604	RpmB	50S ribosomal protein L28	78	8.9934	1	6	53.8	18	0	22.677	-0.540653	0.851557	23.626	23.5532	24.4043	24.4133	24.2002	24.5919
sll1812	RpsE	30S ribosomal protein S5	173	18.241	1	12	76.3	61	0	102.11	-0.546911	1.56849	26.5171	26.5739	26.8502	27.1015	27.0428	27.4376
sll0588	Sll0588	Sll0588 protein	153	16.516	1	1	5.2	6	0	3.4088	-0.557639	0.181532	18.4852	19.8507	18.9034	18.8731	18.2376	21.8016
slr1356	Rps1A	30S ribosomal protein S1 homolog A	328	36.57	1	11	25.6	54	0	59.537	-0.566171	1.32281	25.3994	25.7237	25.8671	26.0482	26.1245	26.5161
slr1622	Ppa	Inorganic pyrophosphatase	169	19.088	1	4	23.7	7	0	25.46	-0.572095	0.136823	19.1488	20.0699	22.5347	22.5999	22.0234	18.8463
sll1806	RplN	50S ribosomal protein L14	122	13.294	1	6	47.5	42	0	37.218	-0.583588	1.08911	24.9891	24.8151	25.3839	25.4869	25.432	26.0199
sll1804	RpsC	30S ribosomal protein S3	240	27.147	1	15	63.8	64	0	82.176	-0.591944	1.59871	25.6391	25.9696	26.1378	26.4808	26.3739	26.6676
ssl0601	RpsU	30S ribosomal protein S21	60	7.3414	1	5	60	24	0	46.621	-0.598396	1.0218	24.5153	24.8086	24.9547	24.9693	25.3005	25.804
sll1740	RplS	50S ribosomal protein L19	122	13.786	1	7	50.8	31	0	29.45	-0.608095	1.14327	25.1711	25.2955	25.878	26.0137	25.868	26.2872
sll1811	RplR	50S ribosomal protein L18	120	13.204	1	5	39.2	30	0	91.188	-0.626148	0.876296	25.8509	26.6446	26.6468	26.6172	27.1146	27.2889
sll0587;chr1_185846	Sll0587	pyruvate kinase;chr1_185846 Hypothetical protein [2959529 - 2958039]	473;497	51.993	2	19;18	57.3	91	0	323.31	-0.633777	0.935562	27.3463	27.5933	28.1646	28.2777	28.0141	28.7137
sll1932;chr1_290236	DnaK3	Chaperone protein dnaK3	771;794	86.029	2	1;1	1.9	6	0	3.9151	-0.634123	0.149948	19.0145	19.9312	18.2744	18.462	17.9635	22.6969
ssl2233	RpsT	30S ribosomal protein S20	97	10.702	1	8	55.7	52	0	103.26	-0.636869	0.874093	27.3572	26.3202	26.5891	27.2467	27.2663	27.664
slr1626	FolB	Probable dihydroneopterin aldolase	118	13.146	1	1	11.9	3	0	11.581	-0.645185	0.269344	18.7562	20.2813	18.4437	18.7231	21.3017	19.3919
slr0483;chr1_115955	Slr0483	Slr0483 protein	149;162	16.885	2	4;4	21.5	16	0	19.374	-0.656286	0.396267	22.4329	20.7523	22.5812	23.2462	22.5664	21.9226
sll1307;chr1_264450	Sll1307	Sll1307 protein	175;190	17.849	2	2;2	17.1	4	0	4.5276	-0.657959	0.238124	18.8576	20.0892	18.4921	21.7078	18.4885	19.2165
slr1665	DapF	Diaminopimelate epimerase	279	30.096	1	1	3.9	2	0	5.9953	-0.667299	0.283976	18.6819	19.8026	18.4523	18.8881	21.344	18.7065
slr0434	Efp	Elongation factor P	187	20.406	1	4	23	27	0	20.631	-0.692305	1.33616	24.8397	24.1982	24.89	25.4242	25.1436	25.437
sll1244	RplI	50S ribosomal protein L9	152	16.641	1	7	46.7	34	0	82.146	-0.694872	2.19647	26.0033	26.3459	26.2616	26.7995	26.8311	27.0648
sll1825	Sll1825	hypothetical protein	196	20.301	1	1	6.1	3	0	4.2495	-0.695321	0.292738	18.7887	20.2079	17.8536	18.8118	20.9828	19.1415
ssl0242	Ssl0242	Ssl0242 protein	78	8.9765	1	1	14.1	2	0	2.4353	-0.715417	0.281586	18.9361	20.4404	18.1177	19.0294	21.4051	19.2059
ssr1853	Ssr1853	Ssr1853 protein	95	10.902	1	5	53.7	25	0	83.907	-0.715687	0.838836	23.7787	24.8025	24.4787	24.7024	24.9431	25.5614
sll1808	Sll1808	50S ribosomal protein L5	200	22.508	1	12	55.5	70	0	71.514	-0.716015	1.38141	26.5865	26.7474	27.0533	27.3002	27.3247	27.9103
sll1813	RplO	50S ribosomal protein L15	147	15.194	1	8	76.9	41	0	95.4	-0.732966	2.25569	25.7511	25.863	26.1568	26.5988	26.5956	26.7754
sll1785	Sll1785	Sll1785 protein	268	30.011	1	3	15.3	7	0	10.51	-0.73357	0.299594	20.6749	20.3879	18.1354	21.0997	21.005	19.2942
sll1822	RpsI	30S ribosomal protein S9	137	15.086	1	11	73.7	53	0	262.75	-0.741778	2.64467	27.5463	27.6006	27.7367	28.2294	28.5393	28.3402
ssl2296	Ssl2296	Putative pterin-4-alpha-carbinolamine dehydratase	96	10.734	1	4	77.1	40	0	157.01	-0.778896	0.784359	28.668	28.2928	27.6082	28.7675	28.5119	29.6263
ssl1426	RpmI	50S ribosomal protein L35	67	7.8913	1	1	19.4	6	0	8.526	-0.779851	0.16557	18.5895	20.0396	18.6654	18.5718	17.7924	23.2698
sll0934	CcmA	Carboxysome formation protein	351	37.633	1	4	14.8	8	0	10.564	-0.784564	0.212369	22.526	19.7259	18.3059	21.703	21.6765	19.5319
slr1678	RplU	50S ribosomal protein L21	124	13.669	1	9	69.4	37	0	108.32	-0.790052	1.32282	26.0038	26.1712	26.3403	26.6737	26.7265	27.4853
slr1122	Slr1122	Slr1122 protein	250	28.176	1	3	11.6	6	0	15.79	-0.791695	0.25679	18.7441	20.1234	18.6077	18.6792	22.1964	18.9747
slr2025	Slr2025	Slr2025 protein	153	16.888	1	1	7.8	2	0	7.0527	-0.833387	0.379036	18.6192	19.7529	17.9177	18.989	21.0935	18.7075
sll1101	RpsJ	30S ribosomal protein S10	105	12.037	1	10	72.4	32	0	70.731	-0.839066	2.13972	25.5746	25.6647	25.8086	26.2254	26.6133	26.7262
sll1821	RplM	50S ribosomal protein L13	151	16.99	1	9	73.5	52	0	72.021	-0.851489	1.71513	26.9159	27.1623	27.4337	27.816	27.8961	28.3543
slr1703	SerS	Serine--tRNA ligase	430	48.037	1	2	11.6	4	0	3.2679	-0.853517	0.19602	18.6194	19.7619	18.789	23.1547	17.9411	18.635
sll0518	Sll0518	Sll0518 protein	385	43.118	1	11	28.6	33	0	54.879	-0.880052	1.21534	23.9561	24.7015	24.5375	24.9393	25.1199	25.776
ssr1399	RpsR	30S ribosomal protein S18	71	8.3808	1	9	69	49	0	41.772	-0.886772	2.68361	28.5863	28.6208	28.6281	29.3911	29.3584	29.7461
sll1800	RplD	50S ribosomal protein L4	210	23.356	1	7	36.7	40	0	136.84	-0.914396	2.14257	27.333	27.2743	27.5777	28.1735	28.1358	28.619
slr0650	Slr0650	Slr0650 protein	201	22.501	1	7	30.8	25	0	27.053	-0.934993	1.9945	24.1269	24.2691	24.0765	24.879	24.9156	25.4829
chr1_116115	Chr1_116115	Hypothetical protein [2622596 - 2622937]	114	12.952	1	2	17.5	5	0	88.843	-0.936574	0.108464	19.0726	20.0042	26.1466	24.8349	18.2913	24.9069
slr0469	RpsD	30S ribosomal protein S4	202	23.183	1	20	72.8	124	0	198.32	-0.958748	1.95497	28.3147	28.4606	28.6228	29.0652	29.4726	29.7366
sll0395	Sll0395	Sll0395 protein	212	23.752	1	11	47.6	34	0	52.999	-0.963708	1.96409	24.4838	24.1602	24.7466	25.207	25.414	25.6607
slr1784	BvdR	Biliverdin reductase	328	36.64	1	7	26.2	28	0	40.619	-0.966513	1.51568	22.9887	23.0678	23.564	23.8037	24.1116	24.6047
sll1744	RplA	50S ribosomal protein L1	238	25.852	1	19	71.8	107	0	253.98	-0.966951	1.69845	27.667	28.1635	28.305	28.7457	28.9598	29.3308
slr0559	NatB	Periplasmic binding protein of ABC transporter for natural amino acids	454	46.672	1	3	12.1	12	0	16.21	-0.969713	0.29232	21.6382	20.1982	18.4144	21.7145	22.2951	19.1503
sll1021	Sll1021	Flotillin family inner membrane protein sll1021	673	74.423	1	35	47.5	122	0	323.31	-0.972082	0.37694	27.6364	26.715	26.7189	28.537	29.4602	25.9895
sll0596	Sll0596	Sll0596 protein	244	26.325	1	9	52.9	35	0	51.87	-0.972716	1.56205	25.3679	26.0102	25.3058	26.1896	26.6337	26.7788
slr0453	Slr0453	hypothetical protein	821	92.447	1	13	17.9	30	0	42.779	-0.991049	1.769	23.1648	22.8967	23.622	24.0988	24.067	24.4909
sll1802	RplB	50S ribosomal protein L2	276	30.433	1	16	48.2	95	0	121.99	-1.00206	1.76549	27.2707	27.5834	27.8482	28.2602	28.5238	28.9244
sll1816	RpsM	30S ribosomal protein S13	127	14.572	1	19	82.7	94	0	164.62	-1.00893	1.95357	28.2924	28.1931	28.5698	28.9948	29.4222	29.6651
sll1784	Sll1784	Sll1784 protein	267	29.757	1	4	17.2	10	0	21.23	-1.024	0.197976	23.5308	19.8836	18.8464	23.4923	22.8219	19.0186
sll1097	RpsG	30S ribosomal protein S7	156	17.384	1	10	71.8	91	0	149.14	-1.02789	1.56169	28.1298	28.0704	28.3345	28.7725	29.0839	29.762
sll1801	RplW	50S ribosomal protein L23	101	11.526	1	9	80.2	50	0	57.883	-1.04245	3.72925	26.4489	26.5904	26.5389	27.5882	27.4442	27.6731
slr0376	Slr0376	Slr0376 protein	116	12.857	1	7	51.7	33	0	108.12	-1.05275	2.22698	24.747	25.4013	25.1052	26.0262	26.1851	26.2004
slr1044	McpA	Methyl-accepting chemotaxis protein	869	93.209	1	5	6	14	0	18.109	-1.05637	0.644131	20.9019	20.3023	18.5844	21.214	21.2714	20.4724
slr0899	CynS	Cyanate hydratase	149	16.532	1	3	24.2	8	0	12.912	-1.06206	0.423077	22.3214	21.8456	19.0142	22.5468	22.2408	21.5798
sll1043	Pnp	Polyribonucleotide nucleotidyltransferase	718	77.83	1	37	52.2	165	0	236.7	-1.06747	3.07856	27.3929	27.5712	27.3937	28.4776	28.3679	28.7147
sll1809	RpsH	30S ribosomal protein S8	133	14.666	1	13	88.7	126	0	172.24	-1.09999	2.15829	29.0596	29.1667	29.4714	30.0483	30.2933	30.6561
slr1884	TrpS	Tryptophan--tRNA ligase	337	37.763	1	14	33.5	63	0	112.93	-1.11027	1.38696	25.6574	26.5115	26.6682	27.0965	27.2946	27.7768
sll1799	RplC	50S ribosomal protein L3	213	22.741	1	13	46.9	79	0	143.41	-1.13742	2.31605	26.7434	27.0305	27.2485	27.955	28.0658	28.4139
ssl1784	RpsO	30S ribosomal protein S15	89	10.373	1	7	62.9	72	0	86.444	-1.14735	2.48228	28.6269	28.6344	28.8065	29.6315	29.6975	30.1809
sll0767	RplT	50S ribosomal protein L20	117	13.553	1	5	36.8	28	0	83.124	-1.15376	1.69251	25.7346	26.4729	26.5889	27.146	27.428	27.6837
ssl3436	RpmC	50S ribosomal protein L29	73	8.5455	1	10	94.5	40	0	136.92	-1.16504	2.28983	26.4032	26.6711	26.6404	27.5186	27.5725	28.1189
sll1817	RpsK	30S ribosomal protein S11	130	13.762	1	11	66.2	51	0	116.34	-1.17274	1.62577	25.9873	26.3955	26.4613	26.9229	27.4991	27.9404
sll1767	RpsF	30S ribosomal protein S6	113	13.237	1	8	61.1	58	0	124.06	-1.20013	2.10604	27.9026	28.2457	28.3944	29.0787	29.3199	29.7446
slr1870	Slr1870	Slr1870 protein	249	27.693	1	5	22.1	17	0	25.695	-1.21657	1.4765	23.7291	24.4618	23.787	24.9852	24.8373	25.8051
sll1807	Sll1807	50S ribosomal protein L24	105	11.707	1	9	72.4	47	0	106.28	-1.22014	2.7869	26.152	26.2205	26.4215	27.3148	27.3784	27.7613
sll1967	Sll1967	Uncharacterized RNA methyltransferase sll1967	463	51.522	1	9	21.6	37	0	36.677	-1.23848	2.15763	23.4827	23.8901	23.9511	24.7491	24.9014	25.3889
ssl3432	RpsS	30S ribosomal protein S19	92	10.29	1	5	57.6	39	0	52.603	-1.25004	2.18297	26.6665	26.4499	27.0307	27.6836	27.9389	28.2748
ssr0482	RpsP	30S ribosomal protein S16	82	9.5561	1	9	79.3	71	0	68.374	-1.29401	1.95415	28.0517	28.2268	28.6839	29.2505	29.5829	30.0111
sll1803	RplV	50S ribosomal protein L22	121	13.502	1	5	58.7	17	0	45.797	-1.33893	2.01721	23.948	24.598	24.5678	25.4582	25.5798	26.0926
sll0602	Sll0602	Sll0602 protein	691	77.763	1	2	3.5	1	0	3.2375	-1.36379	0.530734	18.5277	19.9341	17.8607	19.0217	22.0333	19.3589
sll1172	ThrC	Threonine synthase	382	40.414	1	2	4.2	2	0	3.3492	-1.38906	0.258988	18.3721	20.2876	18.04	24.2748	17.7566	18.8355
ssr0390;chr1_7007	PsaK1	Photosystem I reaction center subunit PsaK 1	86;95	8.6442	2	1;1	19.8	6	0	26.732	-1.39719	0.236818	18.7497	20.1684	18.9982	18.4714	18.375	25.2614
ssl3437	RpsQ	30S ribosomal protein S17	81	9.2887	1	12	74.1	102	0	207.09	-1.40103	2.77954	28.3963	28.6929	28.6949	29.7248	29.9929	30.2695
sll0754	RbfA	Ribosome-binding factor A	133	14.749	1	3	27.8	10	0	17.328	-1.43047	0.536086	18.7634	22.111	22.4356	22.5415	22.3803	22.6796
sll0244	GalE	UDP-glucose 4-epimerase	338	37.13	1	7	27.5	16	0	18.409	-1.46185	0.871466	22.8654	20.5519	22.8112	23.4443	23.3047	23.8651
ssl2598	PsbH	Photosystem II reaction center protein H	64	7.1164	1	1	21.9	11	0	7.1716	-1.48215	0.313148	24.6379	19.127	25.1811	24.4228	24.4275	24.542
slr1102	Slr1102	Slr1102 protein	853	96.638	1	30	36.6	135	0	238.58	-1.5336	2.47072	26.2608	26.5221	26.9075	27.9093	27.9683	28.4136
ssl3445	RpmE	50S ribosomal protein L31	81	9.3036	1	2	25.9	4	0	5.4318	-1.54538	0.30671	18.6982	19.6193	23.189	23.3492	23.7943	18.9991
sll0098	RlmN	Probable dual-specificity RNA methyltransferase RlmN	350	38.856	1	2	6.3	3	0	5.5298	-1.61492	0.678717	18.7711	19.8292	18.3932	21.6044	18.6286	21.6051
chr1_280681	Chr1_280681	Hypothetical protein [811257 - 810925]	111	12.88	1	1	6.3	4	0.0033167	2.2041	-1.66556	0.241883	18.8562	20.2983	18.2862	18.4935	17.8451	26.0988
ssr3451	PsbE	Cytochrome b559 subunit alpha	81	9.4485	1	2	25.9	11	0	27.569	-1.75184	0.49443	24.4657	19.8046	24.3892	24.4573	24.604	24.8537
slr0321	Era	GTPase Era	315	34.791	1	2	6.3	7	0	4.6954	-1.82404	1.81062	18.8717	19.987	18.77	21.0015	20.6602	21.4391
sll1418;chr1_246215	Sll1418	Sll1418 protein	188;205	20.747	2	4;4	27.7	14	0	20.86	-2.03624	1.13496	18.5206	19.5617	18.4193	21.7273	21.5299	19.353
sll1665	Sll1665	Sll1665 protein	589	63.607	1	3	6.3	10	0	17.064	-2.04365	0.916121	18.7913	20.524	22.3894	22.4638	22.7191	22.6527
ssl2084	AcpP	Acyl carrier protein	77	8.5895	1	2	20.8	15	0	12.679	-2.10422	0.290871	18.8833	25.1401	18.8447	25.5991	24.5695	19.0122
slr1984	Rps1b	30S ribosomal protein S1 homolog B	305	33.795	1	2	6.2	5	0	9.0827	-2.16097	0.83781	18.48	20.1094	18.3463	21.9091	22.4545	19.055
slr1615	RfbE	Perosamine synthetase	378	41.944	1	2	4	8	0	4.4693	-2.24446	1.45378	18.3806	20.3922	18.3986	21.2145	20.8981	21.7921
slr0036	AspC	Aminotransferase	389	42.455	1	1	1.8	6	0	5.9046	-2.44684	0.287211	18.7656	20.3852	18.8901	18.5682	18.2219	28.5914
slr1265	RpoC1	DNA-directed RNA polymerase subunit gamma	626	70.977	1	7	11.7	15	0	25.577	-2.5549	0.980466	22.8509	20.0492	18.7195	22.9309	23.0929	23.2605
sfGFPFLAG	sfGFPFLAG	sfGFP-3xFLAG fusion protein	241;249	27.187	2	27;11	81.3	178	0	323.31	-11.4979	1.91732	23.3337	27.1597	18.0631	34.2957	34.1893	34.5653
